# Supplementary material for: A single-cell transcriptomic atlas reveals resident dendritic-like cells in the zebrafish brain parenchyma
Source: eLife. 2025 Dec 11;13:RP91427. doi: 10.7554/eLife.91427 (PMC12698085; doi:10.7554/eLife.91427)
Supplement: Supplementary file 2. [file elife-91427-supp2.xlsx]

## Sheet: Table2_top50_EMBO - Copy
	p_val	avg_log2FC	pct.1	pct.2	p_val_adj	cluster	gene
1	9.44935e-248	2.90354	0.987	0.344	1.35164e-243	MG1	ms4a17a.10
2	4.02912e-232	2.10268	0.947	0.263	5.76326e-228	MG1	slc22a21
3	2.27946e-216	1.92305	0.835	0.177	3.26055e-212	MG1	havcr2
4	2.71012e-214	2.21942	0.904	0.229	3.87656e-210	MG1	havcr1
5	1.54896e-206	1.96177	0.883	0.217	2.21564e-202	MG1	c1qc
6	5.00398e-204	3.00712	1	0.625	7.15769e-200	MG1	lgals3bpb
7	2.006e-196	2.07125	0.896	0.299	2.86938e-192	MG1	ctsh
8	3.83707e-196	2.11821	1	0.85	5.48855e-192	MG1	si:busm1-266f07.2
9	5.63961e-196	1.94227	0.853	0.218	8.0669e-192	MG1	tspan36
10	1.83125e-191	2.37708	0.98	0.49	2.61942e-187	MG1	ifi30
11	4.05708e-191	1.94778	0.769	0.164	5.80324e-187	MG1	si:dkey-192g7.3
12	3.23346e-185	1.87407	1	0.875	4.62514e-181	MG1	cd74b
13	6.38561e-181	1.96333	0.883	0.315	9.13398e-177	MG1	asah1b
14	1.18456e-175	1.89251	0.919	0.412	1.6944e-171	MG1	si:ch211-212k18.7
15	1.19022e-174	1.89213	1	0.952	1.70249e-170	MG1	cd74a
16	1.9147e-173	3.07432	1	0.838	2.73878e-169	MG1	apoc1
17	3.17829e-165	1.66919	1	0.77	4.54623e-161	MG1	zgc:103700
18	1.05128e-161	1.5771	0.688	0.151	1.50376e-157	MG1	si:dkey-26c10.5
19	1.98158e-161	2.26995	1	0.684	2.83445e-157	MG1	ccl34b.1
20	8.36017e-161	1.55983	0.723	0.161	1.19584e-156	MG1	alox5ap
21	1.4822e-159	2.13284	0.929	0.463	2.12014e-155	MG1	sdc4
22	3.65511e-155	1.66628	0.713	0.183	5.22828e-151	MG1	ctsz
23	1.30773e-154	1.49847	0.726	0.167	1.87058e-150	MG1	slco2b1
24	2.4422e-151	1.65413	0.98	0.822	3.49332e-147	MG1	cd63
25	2.09781e-150	1.26412	0.693	0.157	3.00071e-146	MG1	cmklr1
26	5.47033e-149	1.51479	0.787	0.249	7.82476e-145	MG1	si:ch73-158p21.3
27	8.78123e-149	2.53641	0.939	0.509	1.25607e-144	MG1	apoeb
28	2.00437e-148	1.4742	0.741	0.177	2.86705e-144	MG1	mrc1b
29	9.02243e-148	1.69701	0.962	0.564	1.29057e-143	MG1	mhc2b
30	1.25604e-141	1.2565	0.617	0.122	1.79664e-137	MG1	si:zfos-741a10.3
31	1.41207e-138	1.36343	0.995	0.917	2.01982e-134	MG1	mhc1zba
32	1.44477e-135	1.47403	0.67	0.155	2.0666e-131	MG1	marco
33	6.46336e-132	2.10574	0.848	0.321	9.24519e-128	MG1	ch25h
34	1.00152e-121	1.326	0.726	0.254	1.43257e-117	MG1	naga
35	8.38889e-117	1.26006	0.635	0.173	1.19995e-112	MG1	si:dkey-27h10.2
36	7.67422e-114	1.39462	0.947	0.545	1.09772e-109	MG1	psap
37	5.29467e-111	1.26288	0.668	0.202	7.5735e-107	MG1	ctsd
38	9.7387e-111	1.20224	0.957	0.802	1.39302e-106	MG1	zgc:64051
39	7.55617e-110	1.3591	0.774	0.312	1.08083e-105	MG1	scpep1
40	1.50353e-106	1.26651	0.868	0.484	2.15065e-102	MG1	si:ch211-102c2.4
41	3.93505e-106	1.31383	0.914	0.407	5.62869e-102	MG1	fcer1gl
42	4.4809e-102	1.46672	0.934	0.656	6.40948e-98	MG1	npc2
43	4.17026e-100	1.21508	0.721	0.309	5.96514e-96	MG1	atp6ap2
44	3.49287e-98	1.2334	0.657	0.238	4.9962e-94	MG1	si:ch1073-392o20.2
45	6.5524e-88	1.30356	0.83	0.434	9.37256e-84	MG1	ctss2.2
46	1.61187e-78	1.91197	0.368	0.069	2.30562e-74	MG1	hamp
47	5.26457e-65	1.57252	0.898	0.722	7.53044e-61	MG1	hspa5
48	2.03743e-63	1.49756	0.569	0.223	2.91435e-59	MG1	zgc:158343
49	1.81258e-59	1.51328	0.376	0.093	2.59271e-55	MG1	mfap4
50	4.09066e-39	1.25254	0.68	0.439	5.85128e-35	MG1	ccl35.1
51	1.65556e-109	2.08795	0.937	0.286	2.36811e-105	MG2	gng10
52	1.16206e-107	2.83286	0.966	0.381	1.66221e-103	MG2	lgals9l1
53	7.62247e-98	1.13036	0.691	0.127	1.09032e-93	MG2	lta4h
54	2.03826e-90	1.63203	0.829	0.224	2.91552e-86	MG2	lgals2a
55	1.4029e-87	1.76141	1	0.439	2.00671e-83	MG2	fcer1gl
56	1.30312e-85	2.40533	1	0.707	1.86398e-81	MG2	ccl34b.1
57	1.76185e-82	1.17766	0.766	0.174	2.52015e-78	MG2	tgm2l
58	4.02998e-77	1.23504	0.474	0.07	5.76449e-73	MG2	CABZ01073795.1
59	1.71579e-74	0.747643	0.269	0.019	2.45426e-70	MG2	CABZ01000634.1
60	1.27482e-70	1.66752	0.937	0.417	1.8235e-66	MG2	glula
61	2.65734e-70	1.3436	0.886	0.351	3.80105e-66	MG2	ckbb
62	6.86952e-70	2.48439	0.92	0.474	9.82616e-66	MG2	anxa3b
63	1.07187e-69	1.15317	0.726	0.197	1.53321e-65	MG2	caspb
64	1.90487e-69	0.735576	0.48	0.076	2.72473e-65	MG2	rac1a
65	6.24404e-67	1.81749	0.497	0.092	8.93148e-63	MG2	CU459094.3
66	7.25574e-66	1.93473	1	0.85	1.03786e-61	MG2	apoc1
67	3.71706e-65	0.749763	0.543	0.104	5.31689e-61	MG2	lgals9l3
68	2.43774e-55	0.773425	0.554	0.13	3.48695e-51	MG2	cndp2
69	2.675e-52	0.938883	0.651	0.209	3.82632e-48	MG2	pycard
70	2.93974e-51	0.770685	1	0.999	4.205e-47	MG2	tmsb4x
71	3.92036e-48	0.934532	0.251	0.029	5.60768e-44	MG2	si:dkey-79f11.10
72	9.51638e-48	0.702347	0.617	0.172	1.36122e-43	MG2	mpp1
73	3.14728e-46	1.00335	0.994	0.653	4.50187e-42	MG2	lgals3bpb
74	4.62054e-44	1.12396	0.92	0.541	6.60922e-40	MG2	apoeb
75	1.07599e-40	0.990146	1	0.956	1.53909e-36	MG2	cd74a
76	7.03579e-40	0.917037	0.983	0.734	1.0064e-35	MG2	marcksl1a
77	1.91926e-38	0.99156	0.291	0.051	2.74531e-34	MG2	zgc:101699
78	2.32731e-37	1.27428	0.434	0.115	3.32899e-33	MG2	mxc
79	6.73979e-35	0.734109	0.423	0.113	9.64059e-31	MG2	rarres3l
80	1.22837e-34	0.874103	0.789	0.367	1.75706e-30	MG2	ctsba
81	6.96456e-34	0.761637	0.771	0.351	9.96211e-30	MG2	kctd12.2
82	8.42204e-33	0.673915	1	0.999	1.20469e-28	MG2	actb2
83	3.06279e-32	0.705036	0.731	0.288	4.38101e-28	MG2	havcr1
84	9.48327e-31	0.736715	0.726	0.344	1.35649e-26	MG2	atp6v1g1
85	3.01947e-30	0.797612	0.931	0.748	4.31905e-26	MG2	ppiab
86	4.24459e-30	0.748357	0.383	0.109	6.07146e-26	MG2	gbp1
87	1.17707e-29	0.831467	0.994	0.917	1.68369e-25	MG2	RPS17
88	1.42503e-29	0.738936	0.686	0.325	2.03836e-25	MG2	mdh1aa
89	3.91527e-26	0.756616	0.6	0.283	5.6004e-22	MG2	dbi
90	6.33254e-26	0.621065	0.491	0.188	9.05806e-22	MG2	psmb10
91	6.24398e-25	0.713897	0.983	0.889	8.93139e-21	MG2	ybx1
92	5.31357e-23	0.668123	0.777	0.434	7.60053e-19	MG2	atp6v0ca
93	1.15729e-22	0.584854	1	0.937	1.65539e-18	MG2	cfl1
94	1.42934e-21	0.680238	0.606	0.277	2.04453e-17	MG2	clic2
95	2.16515e-20	0.817077	0.623	0.307	3.09702e-16	MG2	BX004816.2
96	2.12431e-18	0.671687	0.469	0.218	3.03861e-14	MG2	sri
97	7.22916e-18	0.599203	0.634	0.339	1.03406e-13	MG2	smox
98	5.72493e-17	0.613891	0.657	0.404	8.18894e-13	MG2	idh2
99	6.33824e-06	0.65621	0.229	0.118	0.0906621	MG2	BX323596.2
100	5.81697e-05	0.978686	0.274	0.171	0.83206	MG2	cxcl11.5
101	5.15517e-125	1.37092	0.896	0.123	7.37396e-121	MG3	scn4bb
102	2.44242e-120	1.82536	0.96	0.175	3.49363e-116	MG3	tgm2l
103	1.3507e-92	1.07137	0.888	0.154	1.93204e-88	MG3	mcamb
104	7.32955e-78	1.61869	0.96	0.296	1.04842e-73	MG3	gng10
105	4.82584e-77	0.916157	0.752	0.134	6.90288e-73	MG3	lta4h
106	1.00041e-73	2.00852	0.992	0.424	1.43099e-69	MG3	glula
107	2.88754e-68	1.36002	0.96	0.33	4.13033e-64	MG3	smox
108	1.37986e-65	1.00732	0.72	0.145	1.97375e-61	MG3	cebpa
109	1.48902e-65	0.992722	0.936	0.231	2.1299e-61	MG3	havcr2
110	2.21675e-65	1.11336	0.88	0.21	3.17084e-61	MG3	slco2b1
111	1.32897e-63	0.900254	0.776	0.173	1.90096e-59	MG3	mpp1
112	8.9349e-63	0.881715	0.76	0.156	1.27805e-58	MG3	si:ch73-86n18.1
113	3.50128e-60	0.934167	0.784	0.178	5.00823e-56	MG3	csf1rb
114	8.91885e-60	1.28991	0.976	0.39	1.27575e-55	MG3	lgals9l1
115	8.21113e-59	1.16588	0.968	0.286	1.17452e-54	MG3	havcr1
116	2.00782e-57	1.81207	1	0.544	2.87199e-53	MG3	apoeb
117	2.84529e-57	0.947523	0.6	0.11	4.06991e-53	MG3	mafbb
118	3.50442e-57	1.44168	0.904	0.317	5.01272e-53	MG3	fosb
119	2.67767e-56	0.987697	0.68	0.141	3.83014e-52	MG3	CR759843.2
120	5.86592e-54	1.02317	0.992	0.321	8.39061e-50	MG3	slc22a21
121	2.3769e-52	1.007	0.832	0.223	3.39992e-48	MG3	mrc1b
122	1.48873e-50	1.29909	0.616	0.137	2.12948e-46	MG3	il1b
123	6.94156e-49	1.64722	1	0.712	9.92921e-45	MG3	ccl34b.1
124	1.21131e-48	1.63721	1	0.659	1.73266e-44	MG3	lgals3bpb
125	2.71033e-46	1.41692	0.936	0.432	3.87686e-42	MG3	egr1
126	1.54036e-45	0.911917	0.536	0.107	2.20332e-41	MG3	ctsla
127	1.78607e-45	0.888242	0.736	0.206	2.55479e-41	MG3	caspb
128	2.98198e-44	1.58722	1	0.852	4.26542e-40	MG3	apoc1
129	1.54784e-43	1.34075	1	0.934	2.21403e-39	MG3	fosab
130	5.58182e-43	0.869797	0.744	0.21	7.98424e-39	MG3	alox5ap
131	8.44112e-42	1.1272	0.984	0.449	1.20742e-37	MG3	fcer1gl
132	9.04819e-42	1.49586	0.984	0.594	1.29425e-37	MG3	tcima
133	5.20258e-41	1.66123	0.776	0.299	7.44177e-37	MG3	si:ch73-335l21.4
134	4.68457e-40	0.861747	0.456	0.089	6.70081e-36	MG3	sgk1
135	3.56735e-39	1.18344	0.88	0.37	5.10273e-35	MG3	ctsba
136	4.60722e-39	0.857333	0.936	0.369	6.59017e-35	MG3	grna
137	5.24797e-36	1.03374	0.888	0.366	7.5067e-32	MG3	ch25h
138	5.8833e-35	1.03641	1	0.974	8.41548e-31	MG3	hsp70l
139	1.88468e-34	1.30222	0.96	0.833	2.69585e-30	MG3	jdp2b
140	5.88219e-32	0.88601	0.848	0.379	8.41388e-28	MG3	txnipa
141	2.53084e-31	0.868056	0.608	0.186	3.62012e-27	MG3	pdk2b
142	8.14516e-31	1.32276	0.968	0.796	1.16508e-26	MG3	socs3a
143	6.25546e-30	1.0471	0.976	0.775	8.94781e-26	MG3	jun
144	7.60662e-30	1.17082	0.376	0.082	1.08805e-25	MG3	fabp11a
145	1.74633e-28	0.901295	0.992	0.924	2.49795e-24	MG3	ubb
146	7.21231e-27	0.91141	0.848	0.436	1.03165e-22	MG3	atp1b1a
147	3.87984e-25	1.04683	0.832	0.482	5.54972e-21	MG3	ddit3
148	4.8171e-22	1.0729	0.728	0.348	6.89039e-18	MG3	pmaip1
149	9.06896e-18	1.31542	0.328	0.098	1.29722e-13	MG3	g0s2
150	6.22943e-17	1.34907	0.552	0.265	8.91058e-13	MG3	hspb1
151	3.67294e-54	1.70328	0.832	0.218	5.25377e-50	MG4	slco2b1
152	2.10873e-44	1.48133	0.621	0.139	3.01633e-40	MG4	scn4bb
153	1.26904e-41	1.87032	0.842	0.308	1.81524e-37	MG4	BX004816.2
154	4.5509e-34	1.44034	0.589	0.149	6.50961e-30	MG4	CR759843.2
155	1.32327e-32	1.28316	0.789	0.36	1.8928e-28	MG4	rnf213a
156	8.34058e-28	1.66353	0.968	0.599	1.19304e-23	MG4	tcima
157	4.04949e-26	1.08048	0.989	0.662	5.79238e-22	MG4	lgals3bpb
158	1.84212e-24	1.01711	0.811	0.401	2.63496e-20	MG4	lgals9l1
159	1.16576e-22	1.07638	0.758	0.335	1.66751e-18	MG4	slc22a21
160	3.19285e-22	1.38336	0.779	0.374	4.56705e-18	MG4	ch25h
161	3.34433e-22	1.48649	0.642	0.269	4.78373e-18	MG4	vmp1
162	2.40413e-18	1.25409	0.947	0.725	3.43887e-14	MG4	CABZ01080568.1
163	8.07336e-17	0.899657	0.505	0.193	1.15481e-12	MG4	csf1rb
164	2.98075e-16	0.792893	0.768	0.436	4.26367e-12	MG4	glula
165	3.09665e-16	0.737858	0.684	0.301	4.42944e-12	MG4	havcr1
166	1.80966e-15	0.835372	0.568	0.237	2.58853e-11	MG4	mrc1b
167	2.03196e-15	1.30346	0.621	0.332	2.90652e-11	MG4	fosb
168	1.43063e-14	0.869997	0.684	0.382	2.04637e-10	MG4	grna
169	5.19294e-14	0.893496	0.358	0.12	7.42798e-10	MG4	acsl4b
170	1.1693e-13	0.678273	0.379	0.138	1.67256e-09	MG4	srgap3
171	2.31167e-13	0.878761	0.474	0.198	3.30661e-09	MG4	tgm2l
172	3.31568e-13	0.737345	0.295	0.087	4.74275e-09	MG4	CABZ01088428.1
173	1.09464e-11	0.576655	0.305	0.104	1.56577e-07	MG4	CU928117.1
174	1.88127e-11	0.70038	1	0.935	2.69098e-07	MG4	fosab
175	1.95839e-11	0.708774	0.168	0.036	2.80128e-07	MG4	ralgps1
176	1.10588e-10	0.691873	0.442	0.209	1.58185e-06	MG4	abcc5
177	2.10406e-10	0.939503	0.989	0.857	3.00964e-06	MG4	btg2
178	2.27113e-10	0.540029	0.337	0.126	3.24862e-06	MG4	nfil3-6
179	4.91042e-10	0.561911	1	0.889	7.02386e-06	MG4	zgc:162730
180	4.97606e-10	0.659617	0.379	0.161	7.11775e-06	MG4	cebpa
181	1.49885e-09	0.89084	0.979	0.777	2.14395e-05	MG4	jun
182	6.10712e-09	0.693648	0.442	0.224	8.73563e-05	MG4	si:dkey-27h10.2
183	1.09583e-08	0.87944	0.589	0.428	0.000156748	MG4	jund
184	3.69218e-08	0.6272	0.379	0.191	0.00052813	MG4	mpp1
185	9.46819e-08	0.836253	0.537	0.349	0.00135433	MG4	smox
186	3.53621e-07	0.590757	0.411	0.218	0.0050582	MG4	cmklr1
187	9.99904e-07	1.21166	0.958	0.887	0.0143026	MG4	zgc:158463
188	1.1087e-06	0.527095	0.979	0.83	0.0158588	MG4	klf6a
189	1.41798e-06	0.946967	0.516	0.358	0.0202827	MG4	pmaip1
190	2.03866e-06	0.564799	0.389	0.231	0.0291611	MG4	tmem131
191	3.96348e-06	0.661625	0.495	0.345	0.0566936	MG4	ccng2
192	7.34719e-06	0.846629	0.589	0.493	0.105094	MG4	ddit3
193	2.36463e-05	0.511246	0.4	0.255	0.338237	MG4	cblb
194	2.50232e-05	0.577327	0.337	0.202	0.357932	MG4	hsph1
195	0.000110216	0.546774	0.505	0.387	1	MG4	ctsba
196	0.000240753	0.548218	0.526	0.433	1	MG4	fkbp5
197	0.000354589	0.715148	0.547	0.449	1	MG4	egr1
198	0.000379338	0.510924	0.674	0.572	1	MG4	ier2a
199	0.00213143	0.559307	0.695	0.571	1	MG4	adgre10
200	0.0081803	0.538959	0.347	0.257	1	MG4	ctsd
201	1.90703e-179	1.67768	0.634	0.045	2.72781e-175	MF	si:dkey-5n18.1
202	1.19247e-151	1.33283	0.436	0.021	1.70572e-147	MF	si:ch211-165i18.2
203	1.51249e-145	1.71923	0.785	0.108	2.16347e-141	MF	rasgef1ba
204	4.6429e-143	1.25256	0.523	0.038	6.64121e-139	MF	NPC2 (1 of many)
205	3.80215e-131	2.41006	0.407	0.022	5.43859e-127	MF	s100a10b
206	9.9468e-119	1.54225	0.599	0.071	1.42279e-114	MF	ahnak
207	3.62829e-117	0.954547	0.221	0.003	5.18991e-113	MF	zgc:174904
208	8.46109e-109	1.05134	0.326	0.016	1.21027e-104	MF	timp2b
209	9.78233e-109	1.85308	0.814	0.166	1.39926e-104	MF	c1qb
210	2.59522e-108	1.02395	0.703	0.106	3.71221e-104	MF	si:ch211-74m13.3
211	2.81489e-104	2.17444	0.669	0.112	4.02642e-100	MF	krt8
212	6.73154e-100	1.55443	0.779	0.16	9.6288e-96	MF	c1qa
213	2.6742e-83	1.06928	0.622	0.118	3.82517e-79	MF	anxa4
214	1.09866e-77	1.76751	0.872	0.267	1.57152e-73	MF	c1qc
215	1.37006e-77	1.18798	0.581	0.104	1.95974e-73	MF	mafbb
216	1.18405e-76	1.30493	0.826	0.214	1.69367e-72	MF	mrc1b
217	3.30446e-75	0.957717	0.57	0.105	4.7267e-71	MF	zgc:152830
218	2.74773e-74	1.76761	0.297	0.024	3.93035e-70	MF	ccl34a.4
219	1.82036e-73	2.02994	0.36	0.039	2.60384e-69	MF	icn
220	2.11201e-73	1.15297	0.89	0.263	3.02102e-69	MF	tspan36
221	6.63741e-72	1.03188	0.657	0.14	9.49415e-68	MF	cebpa
222	9.44999e-70	1.17439	0.558	0.107	1.35173e-65	MF	nfil3-6
223	1.14042e-66	1.45103	0.767	0.228	1.63126e-62	MF	lgals2a
224	6.33897e-66	0.994312	0.669	0.165	9.06727e-62	MF	slc30a1a
225	1.37964e-64	1.1285	0.541	0.105	1.97343e-60	MF	mfap4
226	9.99848e-64	1.7951	0.826	0.296	1.43018e-59	MF	krt18b
227	3.80139e-63	1.05263	0.215	0.013	5.4375e-59	MF	anxa1a
228	1.05145e-61	1.10374	0.628	0.147	1.50399e-57	MF	fgl2a
229	1.61611e-60	0.973729	0.517	0.097	2.31169e-56	MF	si:dkey-102g19.3
230	1.24116e-59	1.1664	0.907	0.427	1.77535e-55	MF	atp6v0ca
231	1.50999e-59	1.29463	0.628	0.17	2.15989e-55	MF	nr4a3
232	2.47613e-59	1.01951	0.709	0.19	3.54186e-55	MF	slc3a2a
233	1.49851e-58	1.46961	0.68	0.193	2.14346e-54	MF	marco
234	2.59465e-56	1.04126	0.61	0.153	3.71139e-52	MF	pfkfb3
235	5.18696e-56	1.18606	0.901	0.361	7.41943e-52	MF	ctsba
236	5.70235e-56	1.16764	0.971	0.441	8.15664e-52	MF	fcer1gl
237	6.02024e-51	1.14128	0.919	0.458	8.61135e-47	MF	ctss2.2
238	7.58181e-50	1.19404	0.744	0.269	1.0845e-45	MF	clic2
239	7.88863e-50	1.56729	0.407	0.079	1.12839e-45	MF	hmox1a
240	3.44382e-45	0.970385	0.477	0.109	4.92604e-41	MF	stoml3b
241	1.69871e-40	1.18386	0.738	0.324	2.42984e-36	MF	slc20a1b
242	8.70939e-40	1.02552	0.907	0.499	1.24579e-35	MF	sdc4
243	9.85164e-40	1.56078	0.878	0.554	1.40918e-35	MF	fthl27
244	1.66234e-38	1.0584	0.779	0.371	2.37782e-34	MF	bzw1b
245	1.86534e-38	1.32619	0.663	0.259	2.66819e-34	MF	vmp1
246	3.13069e-37	1.12492	0.221	0.028	4.47813e-33	MF	cxcl8a
247	8.17056e-30	1.03546	0.709	0.343	1.16872e-25	MF	pmaip1
248	3.36448e-29	1.14031	0.826	0.486	4.81255e-25	MF	lygl1
249	4.90131e-24	1.04086	0.698	0.39	7.01083e-20	MF	ctss2.1
250	1.08157e-07	1.14332	0.413	0.268	0.00154708	MF	hspb1
251	7.24698e-258	0.960415	0.583	0.011	1.03661e-253	DC1	sall3b
252	4.77603e-235	1.11989	0.626	0.018	6.83163e-231	DC1	il12ba
253	1.3707e-228	1.53608	0.904	0.056	1.96066e-224	DC1	cnn3a
254	6.07378e-183	1.35628	0.852	0.066	8.68793e-179	DC1	si:dkeyp-94g1.1
255	4.02716e-166	1.33021	0.817	0.07	5.76046e-162	DC1	dapp1
256	5.27086e-139	1.87066	0.983	0.129	7.53943e-135	DC1	chl1a
257	1.42464e-135	0.941749	0.661	0.05	2.0378e-131	DC1	ank2b
258	3.63859e-135	1.61985	0.896	0.112	5.20464e-131	DC1	spock3
259	1.34971e-129	1.51718	0.904	0.119	1.93062e-125	DC1	zgc:171686
260	3.43137e-126	2.97425	1	0.205	4.90824e-122	DC1	siglec15l
261	4.69637e-126	1.21595	0.835	0.093	6.71769e-122	DC1	si:dkey-23a13.11
262	7.79615e-123	1.16484	0.817	0.099	1.11516e-118	DC1	kazald3
263	4.95979e-111	1.25191	0.8	0.105	7.09448e-107	DC1	rarres3l
264	6.17594e-109	1.30612	0.487	0.033	8.83407e-105	DC1	her9
265	1.10263e-102	1.7354	0.957	0.183	1.5772e-98	DC1	hepacam2
266	4.96041e-102	1.03497	0.783	0.106	7.09537e-98	DC1	bcam
267	1.07817e-92	1.60088	0.93	0.223	1.54222e-88	DC1	def6a
268	9.55755e-91	1.07362	0.817	0.137	1.36711e-86	DC1	si:dkey-238d18.5
269	7.84607e-90	1.03843	0.748	0.11	1.1223e-85	DC1	actn1
270	2.0253e-85	1.72132	0.974	0.226	2.89699e-81	DC1	id2a
271	2.16689e-80	1.26119	0.904	0.203	3.09952e-76	DC1	ehbp1l1b
272	3.44168e-78	0.976415	0.757	0.13	4.92298e-74	DC1	ptprja
273	1.77593e-70	1.25518	0.861	0.214	2.54028e-66	DC1	cyth4a
274	5.20562e-70	1.13547	0.843	0.17	7.44612e-66	DC1	epdl1
275	9.45971e-69	1.09473	0.817	0.177	1.35312e-64	DC1	il12rb2l
276	3.84843e-68	1.59811	0.948	0.292	5.50479e-64	DC1	irf8
277	3.94521e-68	1.80195	0.948	0.301	5.64323e-64	DC1	BX004816.2
278	4.59502e-68	1.14625	0.843	0.2	6.57272e-64	DC1	arhgap12b
279	8.56035e-67	1.28471	0.974	0.303	1.22447e-62	DC1	fybb
280	1.91211e-65	1.33223	0.887	0.225	2.73508e-61	DC1	nck1a
281	5.46411e-65	1.07068	0.809	0.185	7.81586e-61	DC1	irak3
282	2.38308e-57	2.27286	1	0.576	3.40876e-53	DC1	ccl19a.1
283	1.39967e-53	1.03849	0.861	0.236	2.00209e-49	DC1	si:dkey-56m19.5
284	2.19416e-51	0.94428	0.774	0.2	3.13853e-47	DC1	glb1l
285	6.70717e-48	1.83104	0.93	0.421	9.59393e-44	DC1	rgs2
286	2.11925e-46	1.01982	0.896	0.344	3.03138e-42	DC1	fam49ba
287	2.6634e-45	1.26101	1	0.44	3.80973e-41	DC1	mpeg1.1
288	4.32846e-45	1.64778	0.817	0.282	6.19143e-41	DC1	atf3
289	1.15154e-42	1.18378	0.965	0.365	1.64717e-38	DC1	ch25h
290	1.37424e-42	1.01396	0.783	0.254	1.96572e-38	DC1	si:ch211-79k12.1
291	2.3486e-42	0.983248	0.913	0.354	3.35944e-38	DC1	plekho2
292	5.01055e-42	0.956253	0.861	0.312	7.16709e-38	DC1	plxnc1
293	6.5113e-38	1.22815	0.957	0.528	9.31377e-34	DC1	mcl1b
294	3.89746e-35	0.948907	0.983	0.743	5.57492e-31	DC1	rac2
295	3.87618e-32	1.31473	0.626	0.193	5.54449e-28	DC1	plekhf1
296	3.87624e-31	0.999628	1	0.888	5.54458e-27	DC1	zgc:162730
297	1.12024e-30	1.10194	0.983	0.829	1.60239e-26	DC1	klf6a
298	9.41409e-24	0.962225	0.609	0.227	1.34659e-19	DC1	gadd45bb
299	5.04141e-18	1.00219	0.678	0.335	7.21123e-14	DC1	histh1l
300	9.52033e-17	1.01374	0.957	0.797	1.36179e-12	DC1	socs3a
301	9.6774e-91	1.82525	0.846	0.136	1.38426e-86	DC2	chl1a
302	8.35705e-52	1.53994	0.76	0.193	1.19539e-47	DC2	hepacam2
303	6.58583e-49	1.1674	0.51	0.091	9.42037e-45	DC2	pigrl4.2
304	4.19228e-45	1.74838	0.769	0.215	5.99664e-41	DC2	siglec15l
305	3.10139e-42	2.09618	0.99	0.723	4.43622e-38	DC2	CABZ01080568.1
306	4.51471e-39	0.718018	0.298	0.036	6.45784e-35	DC2	nrxn2a
307	3.97994e-38	1.65759	1	0.578	5.6929e-34	DC2	ccl19a.1
308	8.18691e-38	0.923107	0.51	0.107	1.17106e-33	DC2	si:dkey-23a13.11
309	8.3839e-38	1.0175	0.423	0.078	1.19923e-33	DC2	BX927333.1
310	5.53496e-34	1.21158	0.606	0.186	7.91721e-30	DC2	il12rb2l
311	1.58525e-27	1.1927	0.596	0.216	2.26755e-23	DC2	ehbp1l1b
312	4.65738e-25	0.599677	0.212	0.028	6.66191e-21	DC2	ncam1a
313	7.51594e-24	1.11706	0.567	0.196	1.07508e-19	DC2	plekhf1
314	2.47172e-23	0.812412	0.452	0.136	3.53555e-19	DC2	fes
315	1.29197e-22	0.587979	0.298	0.061	1.84803e-18	DC2	mical3a
316	7.44265e-22	0.855172	0.462	0.143	1.0646e-17	DC2	arhgef15
317	3.11566e-19	0.684506	0.288	0.065	4.45664e-15	DC2	ank2b
318	5.26357e-19	1.09708	0.548	0.25	7.52902e-15	DC2	cblb
319	5.96918e-19	0.919358	0.548	0.238	8.53832e-15	DC2	slc15a4
320	2.20764e-18	0.585265	0.279	0.066	3.15781e-14	DC2	tep1
321	3.8406e-18	1.06243	0.615	0.322	5.49359e-14	DC2	plxnc1
322	7.29943e-18	1.00986	0.769	0.449	1.04411e-13	DC2	mpeg1.1
323	7.44753e-18	0.722823	0.26	0.058	1.06529e-13	DC2	si:ch211-113g11.6
324	9.05185e-17	0.860497	0.923	0.584	1.29478e-12	DC2	psap
325	9.17875e-16	0.936605	1	0.889	1.31293e-11	DC2	zgc:162730
326	9.53367e-16	0.753972	0.404	0.145	1.3637e-11	DC2	ptprja
327	1.61788e-15	0.778909	0.442	0.178	2.31422e-11	DC2	CABZ01111959.1
328	4.38646e-13	0.719589	0.981	0.797	6.27439e-09	DC2	socs3a
329	1.31623e-12	0.700947	0.385	0.154	1.88273e-08	DC2	si:dkey-238d18.5
330	1.36489e-12	0.717339	0.375	0.151	1.95233e-08	DC2	cmtm7
331	2.42762e-12	0.709032	0.375	0.14	3.47246e-08	DC2	zgc:171686
332	6.20643e-12	0.568483	0.308	0.106	8.87767e-08	DC2	flt3
333	2.33512e-11	0.692008	0.346	0.14	3.34015e-07	DC2	cadm4
334	1.82671e-10	0.590765	0.404	0.195	2.61293e-06	DC2	2008-03-01
335	2.55622e-10	0.586692	0.904	0.603	3.65641e-06	DC2	mhc2b
336	1.58867e-09	0.566641	0.279	0.106	2.27243e-05	DC2	prkcba
337	4.26803e-09	0.590613	0.279	0.114	6.10499e-05	DC2	cdk6
338	4.54353e-09	0.829935	0.519	0.369	6.49906e-05	DC2	plekho2
339	1.14653e-08	0.574863	0.288	0.122	0.000164	DC2	si:dkey-148a17.5
340	1.58641e-08	0.706049	0.433	0.265	0.00022692	DC2	dock10
341	1.76844e-08	0.974905	0.529	0.371	0.000252957	DC2	BX897691.1
342	2.33469e-07	0.586544	0.375	0.206	0.00333954	DC2	slc12a2
343	1.50206e-06	0.819781	0.471	0.346	0.0214855	DC2	top1l
344	1.60645e-06	0.653573	1	0.829	0.0229787	DC2	klf6a
345	3.37935e-05	0.641612	0.538	0.481	0.483382	DC2	itgae.2
346	9.32548e-05	0.585248	0.587	0.574	1	DC2	tln1
347	0.000154172	0.589807	0.423	0.328	1	DC2	zgc:152863
348	0.00046409	0.571059	0.375	0.27	1	DC2	si:ch211-79k12.1
349	0.00223581	0.601274	0.221	0.137	1	DC2	tiparp
350	0.00358922	0.614098	0.433	0.387	1	DC2	ppp1r15a
351	1.29857e-121	1.5679	0.863	0.097	1.85747e-117	DC3	si:dkey-23a13.11
352	1.51898e-97	1.63779	0.937	0.136	2.17276e-93	DC3	chl1a
353	9.98543e-93	0.936711	0.568	0.049	1.42832e-88	DC3	si:ch211-113g11.6
354	3.2652e-88	0.897933	0.579	0.054	4.67054e-84	DC3	net1
355	2.85735e-84	1.05219	0.663	0.077	4.08716e-80	DC3	crybg1a
356	2.77384e-80	0.938761	0.653	0.075	3.9677e-76	DC3	si:busm1-57f23.1
357	5.86004e-79	1.83614	1	0.21	8.3822e-75	DC3	siglec15l
358	2.07498e-76	1.45974	0.958	0.188	2.96806e-72	DC3	hepacam2
359	1.04681e-70	1.16301	0.737	0.115	1.49735e-66	DC3	grn2
360	6.93735e-70	2.05116	0.874	0.188	9.92318e-66	DC3	plekhf1
361	5.69734e-66	1.09147	0.758	0.129	8.14948e-62	DC3	zgc:171686
362	3.08356e-65	1.69446	0.937	0.232	4.41072e-61	DC3	id2a
363	6.16706e-60	1.16076	0.884	0.208	8.82137e-56	DC3	ehbp1l1b
364	8.22015e-59	1.17393	0.863	0.203	1.17581e-54	DC3	arhgap12b
365	6.89603e-55	1.16869	0.811	0.181	9.86408e-51	DC3	il12rb2l
366	2.32276e-54	2.29698	0.989	0.422	3.32247e-50	DC3	rgs2
367	1.01799e-53	2.72644	1	0.579	1.45613e-49	DC3	ccl19a.1
368	3.12078e-53	1.20576	0.884	0.23	4.46397e-49	DC3	nck1a
369	3.7135e-51	1.98976	1	0.429	5.31179e-47	DC3	grn1
370	2.03999e-49	0.923108	0.684	0.142	2.91799e-45	DC3	cmtm7
371	2.96425e-48	0.899516	0.832	0.202	4.24006e-44	DC3	glb1l
372	6.07569e-44	0.915423	0.863	0.229	8.69067e-40	DC3	slc15a4
373	7.85439e-42	1.22399	0.884	0.358	1.12349e-37	DC3	lcp1
374	9.095e-40	1.36295	1	0.975	1.30095e-35	DC3	actb1
375	1.49615e-39	1.05221	0.916	0.297	2.14009e-35	DC3	irf8
376	1.55283e-38	0.898046	0.768	0.215	2.22117e-34	DC3	srgap2
377	1.11724e-37	0.893947	0.768	0.221	1.5981e-33	DC3	cyth4a
378	1.39037e-37	0.920895	0.821	0.265	1.98879e-33	DC3	gpatch8
379	4.63469e-37	0.927053	0.716	0.201	6.62946e-33	DC3	hcst
380	4.65859e-37	1.1794	1	0.443	6.66364e-33	DC3	mpeg1.1
381	3.17715e-36	0.964083	0.874	0.326	4.54459e-32	DC3	abi3a
382	6.96611e-34	0.998696	0.832	0.312	9.96433e-30	DC3	fybb
383	1.8879e-33	1.34522	1	0.889	2.70046e-29	DC3	zgc:162730
384	2.19445e-33	0.919149	0.874	0.348	3.13895e-29	DC3	fam49ba
385	2.72095e-32	0.952191	0.842	0.316	3.89205e-28	DC3	plxnc1
386	5.47232e-32	0.906378	0.8	0.282	7.82761e-28	DC3	arpc5b
387	1.52274e-31	0.902413	0.768	0.266	2.17812e-27	DC3	rab5aa
388	1.72173e-31	1.657	0.958	0.798	2.46276e-27	DC3	socs3a
389	1.65813e-29	0.976191	0.853	0.362	2.37179e-25	DC3	BX897691.1
390	1.02981e-25	1.05199	0.947	0.531	1.47303e-21	DC3	mcl1b
391	2.93858e-25	0.9576	0.979	0.724	4.20335e-21	DC3	CABZ01080568.1
392	2.77572e-24	1.18239	0.979	0.811	3.97039e-20	DC3	hsp70.1
393	3.04725e-23	1.07538	0.842	0.375	4.35878e-19	DC3	ppp1r15a
394	5.63574e-23	0.904549	1	0.879	8.06136e-19	DC3	hsp70.2
395	5.01593e-19	0.901273	0.979	0.925	7.17479e-15	DC3	ubb
396	1.6866e-17	0.989873	0.958	0.936	2.41251e-13	DC3	fosab
397	5.7372e-17	1.05093	0.916	0.65	8.20649e-13	DC3	junba
398	2.1993e-14	1.09582	0.558	0.231	3.14587e-10	DC3	gadd45bb
399	9.15144e-14	1.00704	0.6	0.292	1.30902e-09	DC3	atf3
400	1.54668e-12	1.00243	0.484	0.209	2.21237e-08	DC3	cited4b
401	1.45539e-96	1.86748	0.975	0.138	2.08179e-92	DC4	chl1a
402	1.31394e-86	1.00215	0.728	0.078	1.87945e-82	DC4	crybg1a
403	6.99217e-76	1.31621	0.852	0.129	1.00016e-71	DC4	zgc:171686
404	1.87429e-72	1.24091	0.84	0.14	2.68098e-68	DC4	cmtm7
405	1.43545e-70	1.55957	0.975	0.191	2.05326e-66	DC4	hepacam2
406	2.22633e-69	1.92363	1	0.213	3.18455e-65	DC4	siglec15l
407	4.56601e-67	2.09257	0.864	0.173	6.53123e-63	DC4	ddit4
408	1.73491e-65	1.75317	0.951	0.231	2.48162e-61	DC4	nck1a
409	7.02275e-63	1.35715	0.926	0.205	1.00453e-58	DC4	arhgap12b
410	6.06901e-55	0.860577	0.691	0.105	8.68111e-51	DC4	si:dkey-23a13.11
411	9.39763e-53	1.20173	0.852	0.178	1.34424e-48	DC4	epdl1
412	4.8997e-50	0.844457	0.63	0.099	7.00853e-46	DC4	flt3
413	4.72119e-49	0.946806	0.704	0.132	6.75319e-45	DC4	cadm4
414	5.21219e-48	1.32293	0.864	0.23	7.45552e-44	DC4	dusp6
415	5.6324e-47	1.12561	0.802	0.184	8.05658e-43	DC4	il12rb2l
416	1.62059e-46	0.912576	0.716	0.141	2.31809e-42	DC4	desi2
417	2.84087e-45	0.894005	0.679	0.133	4.06358e-41	DC4	fes
418	5.72776e-44	1.91485	1	0.975	8.19299e-40	DC4	hsp70l
419	9.25477e-40	0.953173	0.778	0.201	1.3238e-35	DC4	hcst
420	1.78945e-39	1.02865	0.802	0.213	2.55964e-35	DC4	ehbp1l1b
421	2.25722e-39	1.51932	0.938	0.422	3.22872e-35	DC4	fkbp5
422	5.59452e-39	2.05968	0.975	0.425	8.00241e-35	DC4	rgs2
423	1.26298e-38	1.28129	0.852	0.237	1.80656e-34	DC4	id2a
424	9.44552e-38	0.939422	0.84	0.233	1.35109e-33	DC4	slc15a4
425	2.3014e-37	1.10841	0.852	0.266	3.29193e-33	DC4	rab5aa
426	7.41664e-35	1.53341	1	0.89	1.06088e-30	DC4	zgc:162730
427	1.56146e-34	1.80805	1	0.581	2.23352e-30	DC4	ccl19a.1
428	2.74594e-33	0.975325	0.802	0.245	3.9278e-29	DC4	cblb
429	5.606e-32	1.04724	0.802	0.268	8.01882e-28	DC4	gpatch8
430	1.03643e-30	0.864004	0.605	0.146	1.4825e-26	DC4	kdm2ba
431	2.17362e-30	1.12474	0.901	0.31	3.10915e-26	DC4	krt18b
432	6.72242e-29	1.06681	0.753	0.243	9.61575e-25	DC4	ncf1
433	1.11589e-28	1.02975	0.852	0.295	1.59617e-24	DC4	aif1l
434	2.8758e-27	1.21177	0.988	0.925	4.11354e-23	DC4	ubb
435	7.90133e-27	1.02968	1	0.975	1.13021e-22	DC4	actb1
436	2.82429e-26	0.980765	0.605	0.167	4.03987e-22	DC4	pfkfb3
437	2.54574e-25	0.874599	0.84	0.314	3.64143e-21	DC4	fybb
438	2.6471e-25	1.03037	0.975	0.446	3.78641e-21	DC4	mpeg1.1
439	4.30973e-25	1.32423	0.84	0.377	6.16464e-21	DC4	ppp1r15a
440	9.36244e-23	1.04787	0.938	0.534	1.3392e-18	DC4	mcl1b
441	1.33337e-20	1.53203	0.975	0.798	1.90726e-16	DC4	socs3a
442	2.07912e-20	0.948533	0.901	0.434	2.97397e-16	DC4	glula
443	9.65833e-20	0.895057	0.975	0.726	1.38153e-15	DC4	CABZ01080568.1
444	5.12947e-18	1.08066	0.988	0.936	7.3372e-14	DC4	fosab
445	5.76776e-18	1.09907	0.938	0.601	8.2502e-14	DC4	tcima
446	1.75466e-17	1.1616	0.951	0.746	2.50987e-13	DC4	tsc22d3
447	1.37291e-15	1.17305	0.864	0.567	1.96382e-11	DC4	adgre10
448	3.25038e-15	1.35501	0.914	0.836	4.64935e-11	DC4	jdp2b
449	3.08189e-10	1.16435	0.457	0.211	4.40834e-06	DC4	cited4b
450	1.92084e-06	0.999322	0.481	0.271	0.0274757	DC4	hspb1
451	2.64382e-173	0.917204	0.62	0.077	3.78172e-169	Tcells1	zap70
452	5.67367e-125	0.915743	0.603	0.11	8.11561e-121	Tcells1	si:dkey-109a10.2
453	1.06474e-122	1.35948	0.741	0.177	1.523e-118	Tcells1	cxcr4a
454	1.0365e-113	0.787544	0.493	0.078	1.48261e-109	Tcells1	si:dkey-1h24.6
455	1.43577e-110	0.935897	0.741	0.196	2.05372e-106	Tcells1	stk17al
456	2.92909e-105	1.28485	1	0.961	4.18977e-101	Tcells1	slc25a5
457	4.43975e-105	1.35269	1	0.993	6.35062e-101	Tcells1	si:dkey-151g10.6
458	5.43091e-105	0.947636	0.521	0.097	7.76838e-101	Tcells1	si:ch211-196f2.6
459	6.50057e-104	1.39252	0.994	0.792	9.29842e-100	Tcells1	rsl24d1
460	1.80013e-102	1.34599	1	0.955	2.57491e-98	Tcells1	faua
461	2.93438e-100	1.23392	0.997	0.932	4.19734e-96	Tcells1	rack1
462	2.19356e-99	1.2549	1	0.905	3.13766e-95	Tcells1	eef1g
463	4.78758e-99	1.14839	1	0.984	6.84816e-95	Tcells1	eef1a1l1
464	3.11185e-97	1.24491	1	0.895	4.4512e-93	Tcells1	tpt1
465	5.77712e-97	1.22104	0.859	0.401	8.2636e-93	Tcells1	gtpbp4
466	3.84851e-96	1.08178	1	0.979	5.50491e-92	Tcells1	hsp90ab1
467	2.28577e-95	1.16807	1	0.954	3.26956e-91	Tcells1	RPL37A
468	3.05895e-95	1.0516	0.992	0.753	4.37552e-91	Tcells1	serbp1a
469	2.086e-94	1.17687	0.724	0.24	2.98382e-90	Tcells1	mych
470	1.39151e-92	1.14991	0.994	0.921	1.99042e-88	Tcells1	naca
471	1.2518e-91	1.23731	0.997	0.97	1.79058e-87	Tcells1	uba52
472	5.35997e-88	0.98428	0.997	0.85	7.6669e-84	Tcells1	eef2b
473	5.61188e-87	1.05968	0.944	0.568	8.02724e-83	Tcells1	nsa2
474	2.7874e-83	1.00147	0.935	0.579	3.9871e-79	Tcells1	eif3ea
475	4.36107e-83	0.977078	0.558	0.138	6.23807e-79	Tcells1	si:dkey-266f7.10
476	1.42413e-78	1.02215	0.992	0.791	2.03707e-74	Tcells1	btf3
477	7.13474e-78	0.854942	0.775	0.319	1.02055e-73	Tcells1	ddx21
478	6.1394e-75	0.913523	0.868	0.401	8.78179e-71	Tcells1	crip1
479	9.69433e-74	0.95013	0.549	0.153	1.38668e-69	Tcells1	b3gnt5a
480	3.78289e-73	1.36652	0.851	0.423	5.41105e-69	Tcells1	dusp2
481	5.23804e-68	0.825527	0.876	0.52	7.49249e-64	Tcells1	eif3m
482	7.29244e-68	0.954052	0.73	0.282	1.04311e-63	Tcells1	sla2
483	1.31018e-67	1.14931	0.842	0.41	1.87408e-63	Tcells1	tagapa
484	6.60814e-67	1.09918	0.963	0.653	9.45228e-63	Tcells1	cxcr4b
485	1.79493e-65	0.868502	0.944	0.656	2.56746e-61	Tcells1	mibp2
486	2.3599e-65	0.770439	0.642	0.216	3.37561e-61	Tcells1	myca
487	2.08787e-64	0.89075	0.53	0.16	2.98649e-60	Tcells1	arg2
488	2.84678e-63	0.792386	1	0.945	4.07204e-59	Tcells1	nme2b.1
489	1.98579e-62	1.42226	0.327	0.062	2.84047e-58	Tcells1	tnfrsf18
490	2.28295e-59	0.740638	1	0.887	3.26553e-55	Tcells1	ppiaa
491	6.68222e-59	0.841112	0.98	0.755	9.55824e-55	Tcells1	btg1
492	3.40232e-56	0.759719	0.887	0.544	4.86668e-52	Tcells1	eef1da
493	4.55559e-50	0.83464	0.955	0.851	6.51632e-46	Tcells1	eef1b2
494	1.4151e-49	0.854889	0.941	0.611	2.02415e-45	Tcells1	srgn
495	5.25168e-49	0.781212	0.656	0.271	7.512e-45	Tcells1	plk3
496	7.12468e-49	0.862345	0.879	0.488	1.01911e-44	Tcells1	ccr9a
497	5.66396e-45	0.895194	0.87	0.569	8.10173e-41	Tcells1	nr4a1
498	1.99715e-41	0.806509	0.955	0.798	2.85672e-37	Tcells1	cebpb
499	5.22307e-38	0.763379	0.668	0.334	7.47108e-34	Tcells1	irf1b
500	1.0944e-21	1.21516	0.104	0.017	1.56543e-17	Tcells1	igfbp1a
501	2.41294e-240	2.57453	0.791	0.082	3.45146e-236	Tcells2	ascc1
502	1.68295e-204	1.18691	0.685	0.063	2.40728e-200	Tcells2	zgc:136605
503	2.05624e-166	0.870589	0.531	0.042	2.94124e-162	Tcells2	flna
504	6.55906e-161	1.87939	0.902	0.183	9.38208e-157	Tcells2	cxcr4a
505	4.47675e-144	0.89211	0.61	0.076	6.40354e-140	Tcells2	gpr184
506	2.01321e-138	0.84809	0.335	0.014	2.87969e-134	Tcells2	cd8b
507	1.39342e-137	0.890631	0.575	0.07	1.99315e-133	Tcells2	nuggc.1
508	2.84124e-124	1.34965	0.827	0.208	4.0641e-120	Tcells2	stk17al
509	5.01808e-124	1.59993	0.831	0.214	7.17786e-120	Tcells2	myca
510	1.178e-119	1.9601	1	0.491	1.68501e-115	Tcells2	ccr9a
511	4.53746e-110	1.10186	0.717	0.152	6.49038e-106	Tcells2	b3gnt5a
512	5.70826e-93	1.23852	0.882	0.336	8.1651e-89	Tcells2	si:ch211-226m16.2
513	8.01807e-92	1.21508	0.933	0.427	1.1469e-87	Tcells2	si:dkey-262k9.4
514	2.69942e-90	1.30697	1	0.957	3.86125e-86	Tcells2	faua
515	1.54275e-88	1.10378	0.772	0.232	2.20675e-84	Tcells2	si:dkey-185m8.2
516	1.10933e-86	1.28369	1	0.993	1.58679e-82	Tcells2	si:dkey-151g10.6
517	1.78392e-86	1.25518	1	0.97	2.55171e-82	Tcells2	uba52
518	3.98811e-86	1.14379	0.823	0.311	5.7046e-82	Tcells2	scinlb
519	6.46847e-85	0.934425	0.736	0.203	9.2525e-81	Tcells2	si:dkey-183p4.10
520	2.37977e-83	1.29742	0.996	0.799	3.40402e-79	Tcells2	rsl24d1
521	2.81944e-81	0.909064	0.748	0.224	4.03292e-77	Tcells2	dap1b
522	7.72204e-80	1.16449	1	0.956	1.10456e-75	Tcells2	RPL37A
523	1.22082e-79	0.91148	0.717	0.21	1.74627e-75	Tcells2	si:dkey-171c9.3
524	5.32329e-78	1.11486	1	0.934	7.61443e-74	Tcells2	rack1
525	1.59299e-76	1.54696	0.984	0.664	2.27861e-72	Tcells2	ier2b
526	1.01783e-74	1.1208	1	0.909	1.45591e-70	Tcells2	eef1g
527	1.1542e-73	1.09616	0.988	0.761	1.65097e-69	Tcells2	serbp1a
528	4.48935e-73	0.971451	0.606	0.16	6.42157e-69	Tcells2	pde4ba
529	1.37162e-72	1.08965	1	0.899	1.96196e-68	Tcells2	tpt1
530	6.24671e-69	1.46204	0.984	0.801	8.93529e-65	Tcells2	cebpb
531	1.31963e-68	1.00495	1	0.962	1.8876e-64	Tcells2	slc25a5
532	5.07829e-68	1.04303	0.996	0.797	7.26398e-64	Tcells2	btf3
533	1.95892e-65	0.988531	0.783	0.344	2.80203e-61	Tcells2	tefa
534	1.26243e-64	0.889588	1	0.927	1.80577e-60	Tcells2	mhc1uba
535	1.64733e-62	0.974005	1	0.923	2.35633e-58	Tcells2	naca
536	7.84752e-58	0.966494	0.72	0.246	1.12251e-53	Tcells2	id3
537	1.08991e-57	0.98362	0.945	0.581	1.559e-53	Tcells2	nsa2
538	3.04136e-57	0.917313	0.815	0.359	4.35036e-53	Tcells2	sesn1
539	1.85319e-56	0.825611	1	0.98	2.65081e-52	Tcells2	hsp90ab1
540	3.19462e-53	0.853556	0.929	0.552	4.56958e-49	Tcells2	eef1da
541	3.57748e-52	0.85647	1	0.985	5.11723e-48	Tcells2	eef1a1l1
542	5.29444e-52	0.911523	0.835	0.419	7.57317e-48	Tcells2	gtpbp4
543	5.44752e-52	0.892249	0.917	0.593	7.79213e-48	Tcells2	eif3ea
544	8.13023e-52	0.856954	0.827	0.408	1.16295e-47	Tcells2	ucp2
545	1.66649e-51	0.999133	0.78	0.336	2.38374e-47	Tcells2	irf1b
546	1.30185e-46	1.06258	0.835	0.425	1.86217e-42	Tcells2	tagapa
547	3.04425e-38	0.828283	0.657	0.284	4.3545e-34	Tcells2	plk3
548	7.84416e-32	0.880422	0.854	0.589	1.12203e-27	Tcells2	dusp1
549	8.94427e-32	0.863859	0.819	0.542	1.27939e-27	Tcells2	h1fx
550	9.88355e-21	1.00198	0.354	0.143	1.41374e-16	Tcells2	hbegfb
551	0	3.52057	0.941	0.057	0	NK	ccl36.1
552	0	3.22095	0.916	0.046	0	NK	ccl38.6
553	0	2.17144	0.839	0.037	0	NK	si:dkey-183i3.6
554	0	1.42644	0.769	0.039	0	NK	il2rb
555	3.65432e-282	1.64004	0.633	0.026	5.22714e-278	NK	ccl38a.5
556	3.19261e-231	1.03599	0.538	0.025	4.5667e-227	NK	si:ch211-209l18.2
557	6.60118e-202	0.982146	0.448	0.017	9.44233e-198	NK	gzm3.3
558	2.47547e-196	0.853587	0.577	0.044	3.54091e-192	NK	si:ch211-167j9.5
559	1.87251e-176	0.798495	0.392	0.015	2.67844e-172	NK	cxcl32b.1
560	1.74268e-155	1.34695	0.713	0.121	2.49273e-151	NK	si:ch211-165d12.4
561	3.30481e-153	0.880573	0.36	0.016	4.72719e-149	NK	gzm3.2
562	3.48346e-153	0.83909	0.374	0.018	4.98274e-149	NK	gzm3.4
563	1.18061e-142	0.977152	0.503	0.052	1.68874e-138	NK	sat1a.1
564	6.18823e-135	0.715797	0.35	0.019	8.85165e-131	NK	ifng1
565	5.1344e-134	2.27902	0.972	0.422	7.34425e-130	NK	dusp2
566	8.2479e-130	0.79627	0.465	0.049	1.17978e-125	NK	si:ch211-230g15.5
567	4.82673e-119	0.791883	0.507	0.066	6.90416e-115	NK	si:dkey-11f4.20
568	2.12341e-98	1.19871	0.766	0.24	3.03733e-94	NK	pik3r1
569	1.90265e-95	0.77586	0.619	0.133	2.72155e-91	NK	si:dkey-260g12.1
570	1.94735e-95	1.64917	0.773	0.236	2.78548e-91	NK	id3
571	1.2819e-90	0.992421	0.79	0.268	1.83363e-86	NK	wasa
572	5.16684e-87	0.891894	0.713	0.199	7.39065e-83	NK	si:dkey-183p4.10
573	1.37968e-75	0.920111	0.591	0.144	1.9735e-71	NK	si:dkey-266f7.10
574	3.08737e-75	0.786878	0.497	0.106	4.41617e-71	NK	ccr7
575	3.48064e-75	1.10989	0.997	0.759	4.97871e-71	NK	btg1
576	8.58093e-68	1.19752	0.472	0.104	1.22742e-63	NK	tnfrsf9a
577	2.03105e-67	0.979491	0.85	0.394	2.90521e-63	NK	si:ch211-119e14.1
578	3.2227e-66	1.24131	0.717	0.274	4.60976e-62	NK	plk3
579	2.71248e-65	0.955967	0.717	0.293	3.87993e-61	NK	kctd5a
580	5.32383e-65	0.943237	0.787	0.287	7.61521e-61	NK	sla2
581	1.32549e-63	1.12014	0.318	0.049	1.89598e-59	NK	ccl34b.4
582	5.54318e-59	0.983817	0.692	0.29	7.92896e-55	NK	syk
583	7.27258e-56	0.940921	0.927	0.585	1.04027e-51	NK	ccni
584	9.88821e-55	0.834703	0.993	0.904	1.41441e-50	NK	cirbpb
585	3.21206e-54	0.853058	0.955	0.617	4.59453e-50	NK	srgn
586	5.36142e-52	1.16907	0.804	0.424	7.66898e-48	NK	tagapa
587	2.15974e-48	0.888623	0.997	0.958	3.08929e-44	NK	dnajb1b
588	7.13393e-46	0.835846	0.948	0.753	1.02044e-41	NK	wasb
589	9.71439e-41	0.753222	0.993	0.916	1.38955e-36	NK	sat1a.2
590	6.51641e-39	0.684481	0.22	0.039	9.32107e-35	NK	egr2b
591	1.59906e-34	0.817796	0.818	0.537	2.2873e-30	NK	junbb
592	1.91789e-29	0.926032	0.843	0.674	2.74335e-25	NK	ier2b
593	1.26408e-28	0.826467	0.885	0.681	1.80815e-24	NK	nfkbiab
594	5.38312e-28	0.824189	1	0.973	7.70001e-24	NK	hsp70l
595	3.48178e-25	0.72769	0.717	0.466	4.98034e-21	NK	ptpn6
596	1.89851e-24	0.974707	0.727	0.468	2.71563e-20	NK	gadd45ba
597	8.51299e-23	0.837861	0.367	0.143	1.2177e-18	NK	rgs5b
598	5.33357e-18	0.719676	0.927	0.805	7.62913e-14	NK	hsp70.1
599	7.35751e-18	0.740054	0.661	0.431	1.05242e-13	NK	egr1
600	2.44835e-07	1.46811	0.192	0.099	0.00350212	NK	g0s2
601	0	4.80867	0.918	0.01	0	ILC	si:dkey-21e2.13
602	0	4.72261	1	0.024	0	ILC	si:ch211-212d10.1
603	0	4.05419	0.947	0.011	0	ILC	il4
604	0	4.03061	0.976	0.01	0	ILC	il13
605	0	3.86723	0.633	0.009	0	ILC	si:dkey-21e2.10
606	0	2.78687	0.536	0.004	0	ILC	si:dkey-78l4.2
607	0	2.03707	0.802	0.003	0	ILC	il11b
608	0	1.80605	0.812	0.008	0	ILC	CR847844.1
609	0	1.78496	0.783	0.026	0	ILC	si:ch211-198c19.3
610	0	1.31094	0.749	0.003	0	ILC	si:dkey-8e10.2
611	0	1.20969	0.56	0.005	0	ILC	ccr12b.1
612	0	1.1636	0.696	0.004	0	ILC	sox13
613	4.75553e-306	1.12338	0.546	0.006	6.80231e-302	ILC	FO203432.1
614	1.87387e-273	2.13154	0.507	0.008	2.68039e-269	ILC	si:ch73-47f2.1
615	1.85117e-260	1.17218	0.425	0.002	2.64792e-256	ILC	si:dkey-21e2.7
616	2.16971e-247	1.88578	0.903	0.092	3.10355e-243	ILC	cldni
617	3.78054e-243	3.70803	0.493	0.011	5.40769e-239	ILC	si:dkey-21e2.8
618	2.00689e-232	1.25072	0.758	0.058	2.87066e-228	ILC	cox8b
619	4.22834e-230	3.0189	0.43	0.007	6.04822e-226	ILC	si:dkey-21e2.15
620	3.56176e-228	1.21192	0.42	0.006	5.09475e-224	ILC	zmp:0000001323
621	1.18387e-225	1.38718	0.676	0.043	1.6934e-221	ILC	ca2
622	1.25163e-149	2.22155	0.271	0.003	1.79033e-145	ILC	si:dkey-21e2.16
623	1.3985e-115	2.28041	0.986	0.867	2.00042e-111	ILC	laptm5
624	1.3119e-107	1.88957	0.198	0.003	1.87654e-103	ILC	si:dkey-78l4.5
625	2.53434e-107	2.07333	0.913	0.291	3.62512e-103	ILC	sla2
626	1.50352e-100	1.73317	0.86	0.256	2.15064e-96	ILC	fabp3
627	4.07333e-100	1.01508	0.734	0.157	5.82649e-96	ILC	aldocb
628	1.87925e-89	1.47736	1	0.948	2.68808e-85	ILC	nme2b.1
629	1.38164e-86	1.86072	0.58	0.107	1.9763e-82	ILC	tnfrsf9a
630	1.83151e-86	1.53012	0.986	0.668	2.6198e-82	ILC	sec61g
631	2.41783e-82	1.45215	0.981	0.624	3.45847e-78	ILC	srgn
632	4.48533e-80	1.10722	1	0.989	6.41582e-76	ILC	hspa8
633	1.20369e-79	1.24659	0.531	0.1	1.72176e-75	ILC	tdh
634	4.62417e-79	1.255	0.884	0.301	6.61441e-75	ILC	si:dkey-33i11.9
635	2.27045e-76	1.70027	0.86	0.36	3.24765e-72	ILC	bzw1b
636	7.68331e-76	1.42065	0.99	0.87	1.09902e-71	ILC	pnrc2
637	1.29571e-69	1.52436	0.952	0.633	1.85338e-65	ILC	xbp1
638	1.4101e-66	1.60586	0.86	0.387	2.01701e-62	ILC	bhlhe40
639	1.01756e-62	1.1727	0.947	0.486	1.45551e-58	ILC	chac1
640	1.7159e-62	1.52123	0.976	0.804	2.45443e-58	ILC	cebpb
641	2.13723e-62	1.19118	0.957	0.586	3.0571e-58	ILC	nsa2
642	5.02645e-61	1.13694	1	0.8	7.18983e-57	ILC	btf3
643	6.77454e-61	1.11863	0.72	0.249	9.6903e-57	ILC	n4bp1
644	8.5037e-57	1.16274	1	0.801	1.21637e-52	ILC	rsl24d1
645	1.0666e-55	1.59687	0.826	0.397	1.52567e-51	ILC	nfkbiaa
646	1.34684e-55	1.04992	1	0.993	1.92652e-51	ILC	si:dkey-151g10.6
647	2.50683e-55	1.06458	1	0.971	3.58577e-51	ILC	uba52
648	1.15186e-51	1.00075	0.995	0.925	1.64762e-47	ILC	naca
649	5.23949e-45	1.02991	0.899	0.538	7.49456e-41	ILC	rgs13
650	3.64595e-42	1.30047	0.86	0.48	5.21517e-38	ILC	arl5c
651	0	4.59583	1	0.006	0	Neutro	si:ch211-9d9.1
652	0	3.34954	0.882	0.003	0	Neutro	scpp8
653	0	3.30383	0.941	0.004	0	Neutro	mmp9
654	0	2.66468	0.941	0.001	0	Neutro	mpx
655	0	2.15452	0.882	0.002	0	Neutro	cxcr1
656	0	1.49704	0.765	0	0	Neutro	illr4
657	6.52064e-271	1.69024	0.588	0.002	9.32712e-267	Neutro	si:ch73-343l4.8
658	4.09688e-220	4.67106	0.882	0.009	5.86018e-216	Neutro	BX908782.2
659	1.13897e-214	3.20451	0.882	0.009	1.62918e-210	Neutro	lect2l
660	6.69122e-176	3.33773	0.941	0.014	9.57112e-172	Neutro	npsn
661	1.14077e-171	3.08984	1	0.017	1.63176e-167	Neutro	adam8a
662	1.40158e-93	1.83825	0.235	0.001	2.00482e-89	Neutro	si:ch1073-429i10.1
663	1.56935e-89	5.23597	0.529	0.009	2.2448e-85	Neutro	lyz
664	3.1576e-87	1.50995	0.529	0.009	4.51663e-83	Neutro	thy1
665	4.68146e-76	1.53497	0.824	0.029	6.69636e-72	Neutro	timp2b
666	1.6274e-63	1.62253	0.647	0.021	2.32783e-59	Neutro	cfbl
667	4.7352e-63	1.46936	0.588	0.017	6.77323e-59	Neutro	cd7al
668	4.65794e-51	1.20098	0.412	0.01	6.66272e-47	Neutro	sult2st1
669	1.64869e-43	1.19072	0.588	0.027	2.35829e-39	Neutro	CT030188.1
670	9.28998e-43	1.22442	0.588	0.026	1.32884e-38	Neutro	ponzr6
671	3.4245e-42	2.35921	0.882	0.07	4.8984e-38	Neutro	il6r
672	1.0647e-34	1.60082	0.647	0.042	1.52294e-30	Neutro	si:ch211-264f5.2
673	5.0203e-34	1.33076	0.588	0.035	7.18104e-30	Neutro	slc7a3a
674	4.1084e-33	0.989508	0.235	0.005	5.87666e-29	Neutro	ppdpfa
675	7.17227e-31	1.11761	0.471	0.024	1.02592e-26	Neutro	si:ch211-193e13.5
676	2.80741e-27	2.03985	0.765	0.079	4.01572e-23	Neutro	si:ch211-136m16.8
677	7.5313e-23	2.10335	0.824	0.116	1.07728e-18	Neutro	si:dkey-102g19.3
678	5.32515e-21	2.06221	0.765	0.105	7.61709e-17	Neutro	antxr2a
679	6.47151e-19	1.01968	0.588	0.063	9.25684e-15	Neutro	f11r.1
680	3.44337e-17	1.06719	0.412	0.035	4.9254e-13	Neutro	zgc:77112
681	9.75537e-16	1.14782	0.647	0.093	1.39541e-11	Neutro	ltb4r
682	1.10798e-13	0.993624	0.471	0.055	1.58485e-09	Neutro	icn
683	1.46541e-13	1.63931	0.765	0.153	2.09613e-09	Neutro	il1b
684	1.42651e-12	1.18246	0.471	0.063	2.04048e-08	Neutro	si:ch211-66e2.3
685	7.67978e-12	1.00232	0.412	0.051	1.09852e-07	Neutro	ube4b
686	3.90667e-11	2.71279	1	0.646	5.5881e-07	Neutro	srgn
687	3.97265e-09	1.0739	0.529	0.113	5.68248e-05	Neutro	glipr1a
688	3.98331e-09	1.49736	0.765	0.264	5.69773e-05	Neutro	si:ch73-248e21.5
689	4.60108e-09	1.22597	0.647	0.164	6.58139e-05	Neutro	slc2a3b
690	1.65773e-08	1.49121	1	0.467	0.000237122	Neutro	fcer1gl
691	4.2842e-06	1.51609	0.647	0.254	0.0612811	Neutro	ncf1
692	8.9287e-06	1.14801	0.412	0.101	0.127716	Neutro	CABZ01001434.1
693	1.19661e-05	1.53155	0.941	0.53	0.171163	Neutro	ccr9a
694	1.89484e-05	1.03525	1	0.84	0.271038	Neutro	cd63
695	6.81073e-05	1.18145	0.471	0.161	0.974207	Neutro	nccrp1
696	0.000224702	1.07395	0.647	0.348	1	Neutro	ccng2
697	0.000328973	1.34703	0.647	0.379	1	Neutro	si:ch211-226m16.2
698	0.000365324	1.16902	0.588	0.263	1	Neutro	odc1
699	0.000589586	1.6818	0.647	0.435	1	Neutro	selenow1
700	0.00486676	1.06743	0.471	0.229	1	Neutro	si:dkey-27h10.2
701	3.57295e-298	0.908183	0.535	0.006	5.11075e-294	Prol	ccna2
702	1.56839e-270	1.53199	0.642	0.023	2.24343e-266	Prol	mki67
703	2.51157e-261	1.11466	0.545	0.013	3.59255e-257	Prol	cdk1
704	7.58468e-257	1.2776	0.551	0.014	1.08491e-252	Prol	top2a
705	6.53416e-245	0.942847	0.567	0.018	9.34647e-241	Prol	smc2
706	4.42267e-231	1.32951	0.492	0.012	6.32619e-227	Prol	si:dkey-108k21.10
707	4.45013e-222	1.20291	0.492	0.014	6.36547e-218	Prol	nusap1
708	8.64871e-222	0.986079	0.455	0.01	1.23711e-217	Prol	zgc:110540
709	3.22616e-218	1.15402	0.455	0.01	4.6147e-214	Prol	ube2c
710	2.83501e-184	0.954422	0.422	0.013	4.0552e-180	Prol	mibp
711	6.01478e-172	1.83822	0.583	0.043	8.60354e-168	Prol	stmn1a
712	6.99901e-143	0.912169	0.332	0.01	1.00114e-138	Prol	zgc:194627
713	1.70124e-139	2.10409	0.92	0.221	2.43345e-135	Prol	hmgb2b
714	2.67906e-139	1.09134	0.364	0.015	3.83212e-135	Prol	cenpf
715	2.60779e-137	1.52185	0.818	0.15	3.73018e-133	Prol	si:ch211-288g17.3
716	2.78779e-134	0.974935	0.604	0.065	3.98765e-130	Prol	dek
717	3.39385e-131	0.910659	0.487	0.038	4.85456e-127	Prol	h2afx
718	8.4841e-127	0.84488	0.38	0.021	1.21357e-122	Prol	dut
719	1.78979e-123	2.1695	0.898	0.246	2.56012e-119	Prol	tubb2b
720	2.71629e-111	2.05687	0.524	0.063	3.88539e-107	Prol	zgc:110425
721	2.28259e-108	2.37286	0.995	0.559	3.26502e-104	Prol	hmgb2a
722	1.89878e-103	1.70349	0.813	0.206	2.71602e-99	Prol	tuba8l
723	9.89188e-100	1.27214	0.738	0.156	1.41493e-95	Prol	si:ch73-281n10.2
724	5.04543e-99	0.970172	0.267	0.012	7.21698e-95	Prol	kpna2
725	4.01848e-97	1.97236	0.888	0.321	5.74803e-93	Prol	h2afvb
726	4.70949e-96	3.00419	1	0.813	6.73646e-92	Prol	hmgn2
727	1.58055e-92	1.76371	0.599	0.109	2.26082e-88	Prol	pcna
728	1.13839e-91	1.84554	0.93	0.391	1.62836e-87	Prol	h3f3b.1
729	3.7507e-91	0.878769	0.545	0.083	5.365e-87	Prol	rbbp4
730	3.77325e-90	1.01	0.626	0.115	5.39726e-86	Prol	lbr
731	2.84358e-85	1.02998	0.503	0.076	4.06745e-81	Prol	pclaf
732	5.97922e-80	1.54429	0.914	0.395	8.55268e-76	Prol	tuba8l4
733	1.07706e-74	0.931941	0.578	0.113	1.54062e-70	Prol	rpa2
734	1.1238e-73	0.840372	0.583	0.121	1.60749e-69	Prol	h2afva
735	1.85253e-70	1.42834	0.93	0.41	2.64986e-66	Prol	si:ch211-222l21.1
736	2.26479e-70	1.33255	1	0.895	3.23956e-66	Prol	ptmab
737	8.1944e-66	1.52743	0.952	0.76	1.17213e-61	Prol	tubb4b
738	3.08609e-63	0.89328	0.636	0.176	4.41435e-59	Prol	anp32b
739	2.4186e-61	0.911094	0.684	0.198	3.45957e-57	Prol	calm2b
740	8.84648e-60	0.931444	0.722	0.245	1.2654e-55	Prol	sub1a
741	8.24684e-59	1.02511	0.813	0.317	1.17963e-54	Prol	hmga1a
742	6.70286e-57	0.885986	0.743	0.267	9.58777e-53	Prol	calm3b
743	4.25216e-56	0.843231	0.674	0.21	6.08229e-52	Prol	anp32a
744	9.23694e-55	0.913543	0.69	0.235	1.32125e-50	Prol	snrpf
745	5.42747e-49	0.990764	0.968	0.774	7.76345e-45	Prol	cirbpa
746	1.04538e-40	0.835511	1	0.936	1.49532e-36	Prol	cfl1
747	1.25478e-29	1.06635	0.727	0.415	1.79484e-25	Prol	si:ch73-1a9.3
748	1.39264e-21	1.35868	0.337	0.111	1.99203e-17	Prol	ccl38.6
749	2.67349e-17	1.65583	0.326	0.125	3.82415e-13	Prol	ccl36.1
750	2.8807e-07	1.26915	0.519	0.441	0.00412056	Prol	grn1
751	4.09347e-183	0.616232	0.316	0.002	5.8553e-179	NKL	eomesa
752	1.39562e-172	0.905456	0.276	0.001	1.99629e-168	NKL	CR792453.3
753	2.12792e-111	2.13461	0.211	0.003	3.04378e-107	NKL	sparc
754	2.14345e-104	1.00567	0.316	0.015	3.06599e-100	NKL	ccl33.2
755	3.7323e-93	0.505493	0.25	0.009	5.33868e-89	NKL	sftpba
756	4.56247e-93	0.539497	0.145	0	6.52616e-89	NKL	tfpia
757	4.98613e-83	0.775984	0.428	0.044	7.13216e-79	NKL	ak1
758	6.89414e-80	0.535791	0.224	0.009	9.86137e-76	NKL	npsn
759	5.09222e-67	0.585344	0.322	0.03	7.28392e-63	NKL	lcp2b
760	6.7816e-67	1.83906	0.105	0	9.7004e-63	NKL	col1a1a
761	3.5913e-61	0.560601	0.138	0.003	5.137e-57	NKL	tpm4a
762	4.05369e-61	1.08016	0.224	0.014	5.7984e-57	NKL	cfbl
763	2.65181e-53	0.786216	0.105	0.002	3.79315e-49	NKL	igfbp5b
764	6.79094e-53	0.780457	0.408	0.066	9.71376e-49	NKL	si:ch211-136m16.8
765	4.7675e-50	0.877439	0.132	0.005	6.81943e-46	NKL	mdka
766	3.41851e-49	2.52548	0.151	0.007	4.88983e-45	NKL	wu:fj16a03
767	9.36118e-48	1.12297	0.118	0.004	1.33902e-43	NKL	si:dkey-9i23.4
768	1.72112e-45	0.65907	0.257	0.029	2.46188e-41	NKL	bag3
769	5.69038e-38	0.577944	0.112	0.005	8.13953e-34	NKL	krt18a.1
770	2.944e-32	0.681953	0.178	0.02	4.21109e-28	NKL	glulb
771	3.62397e-29	0.574441	0.224	0.035	5.18372e-25	NKL	cd82a
772	1.17997e-27	0.511786	0.368	0.091	1.68783e-23	NKL	cox8b
773	6.01324e-26	1.03061	0.289	0.065	8.60135e-22	NKL	si:ch211-198c19.3
774	1.03597e-24	0.840977	0.434	0.154	1.48185e-20	NKL	vaspa
775	1.15586e-23	0.6614	0.428	0.128	1.65334e-19	NKL	krt8
776	4.33769e-22	0.576876	0.283	0.072	6.20463e-18	NKL	si:ch73-46j18.5
777	3.38432e-21	0.552416	0.322	0.093	4.84093e-17	NKL	fermt3b
778	5.68575e-21	1.17253	0.158	0.025	8.1329e-17	NKL	cebpd
779	7.84447e-20	0.668858	0.211	0.045	1.12207e-15	NKL	si:ch211-277c7.6
780	1.07405e-18	1.05407	0.217	0.049	1.53633e-14	NKL	icn
781	4.69653e-18	0.619681	0.336	0.111	6.71792e-14	NKL	gstm.1
782	1.20948e-14	0.943914	0.711	0.458	1.73005e-10	NKL	fcer1gl
783	1.61278e-14	0.543247	0.941	0.749	2.30693e-10	NKL	ppiab
784	6.60775e-14	0.575427	0.421	0.199	9.45173e-10	NKL	stk17b
785	6.99508e-13	0.53908	0.671	0.424	1.00058e-08	NKL	selenow1
786	6.98151e-11	0.688525	0.145	0.037	9.98635e-07	NKL	id1
787	2.86082e-10	0.73373	0.513	0.359	4.09212e-06	NKL	grap2b
788	4.1147e-09	0.60067	0.572	0.41	5.88566e-05	NKL	idh2
789	1.65113e-08	0.667328	0.336	0.165	0.000236178	NKL	fgl2a
790	2.17926e-08	0.668524	0.546	0.382	0.000311722	NKL	spi1b
791	6.08887e-08	0.847502	1	0.999	0.000870953	NKL	actb2
792	2.37948e-07	0.712592	0.105	0.03	0.0034036	NKL	slc16a9a
793	2.9394e-07	0.640113	0.658	0.57	0.00420451	NKL	tln1
794	4.09863e-07	1.14738	0.125	0.039	0.00586267	NKL	ggctb
795	1.69274e-06	0.85478	0.829	0.82	0.024213	NKL	cotl1
796	2.51702e-05	0.728166	0.105	0.038	0.360034	NKL	FO203432.1
797	5.72666e-05	0.618811	0.612	0.528	0.819142	NKL	si:ch211-102c2.4
798	0.000330615	0.90667	0.461	0.422	1	NKL	fcer1g
799	0.000892564	0.987285	0.158	0.086	1	NKL	fxyd1
800	0.00618602	0.574983	0.947	0.991	1	NKL	pfn1
801	9.19564e-96	2.49461	1	0.999	1.31534e-91	My1	tmsb4x
802	6.90105e-90	2.20101	1	0.975	9.87126e-86	My1	actb1
803	2.09857e-86	1.77742	0.887	0.278	3.00179e-82	My1	aif1l
804	2.34486e-79	1.49604	1	0.988	3.35409e-75	My1	pfn1
805	5.17126e-76	2.4156	1	0.57	7.39697e-72	My1	ccl19a.1
806	7.84277e-76	1.41649	1	0.999	1.12183e-71	My1	actb2
807	1.49938e-73	1.64572	1	0.855	2.14471e-69	My1	arpc1b
808	1.54352e-73	2.2098	0.943	0.419	2.20785e-69	My1	grn1
809	1.09998e-66	1.472	1	0.937	1.57341e-62	My1	cfl1
810	2.87124e-65	1.41988	0.774	0.273	4.10703e-61	My1	arpc5b
811	6.42642e-62	1.54025	0.981	0.74	9.19235e-58	My1	rac2
812	1.11652e-53	1.07711	0.509	0.115	1.59707e-49	My1	nme2b.2
813	5.31631e-53	1.03744	0.642	0.194	7.60445e-49	My1	hcst
814	2.24602e-50	0.864747	0.516	0.113	3.21271e-46	My1	grn2
815	8.35966e-50	1.21157	0.761	0.32	1.19577e-45	My1	abi3a
816	1.36266e-49	1.35316	0.987	0.812	1.94914e-45	My1	cotl1
817	4.55128e-48	1.39198	0.818	0.409	6.51016e-44	My1	gpx1a
818	4.34584e-43	1.17816	0.736	0.344	6.21629e-39	My1	fam49ba
819	1.34814e-42	1.13804	0.899	0.674	1.92838e-38	My1	arpc2
820	6.97891e-40	1.10726	0.918	0.709	9.98263e-36	My1	cdc42l
821	4.5796e-37	0.892931	0.585	0.214	6.55066e-33	My1	fgd4b
822	4.51998e-36	0.988519	0.987	0.854	6.46538e-32	My1	ptmaa
823	1.93907e-35	1.07593	0.767	0.406	2.77364e-31	My1	fcer1g
824	2.52957e-33	0.732606	0.352	0.081	3.6183e-29	My1	pdxka
825	1.17964e-32	0.906704	0.981	0.863	1.68736e-28	My1	arhgdig
826	6.27993e-32	1.01929	0.679	0.361	8.98281e-28	My1	tpm3
827	1.61137e-31	1.08571	0.673	0.358	2.3049e-27	My1	lcp1
828	4.00576e-31	1.00618	0.704	0.319	5.72984e-27	My1	si:dkey-33i11.9
829	1.35226e-29	1.03637	0.742	0.462	1.93428e-25	My1	hcls1
830	1.41108e-28	0.799519	0.962	0.851	2.0184e-24	My1	coro1a
831	7.74612e-27	0.903752	0.667	0.378	1.108e-22	My1	anxa11b
832	1.45608e-26	0.887688	0.818	0.659	2.08277e-22	My1	myl12.1
833	2.44966e-26	1.03616	0.736	0.536	3.50399e-22	My1	arpc3
834	5.38602e-26	0.923158	0.95	0.737	7.70417e-22	My1	marcksl1a
835	1.30526e-23	0.909539	0.673	0.447	1.86705e-19	My1	arpc4
836	1.38464e-23	1.05354	0.717	0.536	1.98058e-19	My1	gabarapb
837	1.64367e-23	0.884516	0.767	0.485	2.35111e-19	My1	anxa3b
838	2.23223e-23	0.936818	0.692	0.465	3.19298e-19	My1	glrx
839	4.96421e-22	0.892851	0.579	0.321	7.10081e-18	My1	cox6b1
840	5.53902e-22	0.659355	0.994	0.897	7.92301e-18	My1	ptmab
841	7.49666e-22	0.790852	0.66	0.427	1.07232e-17	My1	capza1b
842	1.5748e-20	0.648915	0.358	0.118	2.25259e-16	My1	rarres3l
843	6.76793e-20	1.04018	0.679	0.535	9.68085e-16	My1	zgc:153867
844	7.76962e-20	0.872565	0.629	0.418	1.11137e-15	My1	arpc4l
845	9.07081e-20	0.67233	0.396	0.156	1.29749e-15	My1	slc9a3r1a
846	1.41908e-17	0.697001	0.459	0.228	2.02985e-13	My1	capns1b
847	8.25552e-17	0.754407	0.535	0.306	1.18087e-12	My1	wipf1a
848	1.00313e-16	0.653435	0.409	0.179	1.43487e-12	My1	batf3
849	1.35586e-16	0.739041	0.597	0.363	1.93942e-12	My1	kctd12.2
850	1.17986e-13	0.687041	0.654	0.482	1.68768e-09	My1	arl6ip1
851	2.9158e-229	2.1262	0.825	0.053	4.17076e-225	My2	ckba
852	9.05608e-203	3.45482	0.985	0.117	1.29538e-198	My2	sftpbb
853	5.56e-202	1.29544	0.803	0.056	7.95302e-198	My2	syngr3b
854	1.06661e-171	1.26795	0.839	0.081	1.52568e-167	My2	si:ch211-1o7.3
855	1.14697e-132	2.03926	0.927	0.162	1.64063e-128	My2	epdl1
856	1.20199e-132	1.04151	0.387	0.015	1.71932e-128	My2	tnfa
857	6.22626e-105	1.61659	0.285	0.01	8.90605e-101	My2	BX323596.1
858	3.06009e-100	1.03199	0.759	0.113	4.37716e-96	My2	spock3
859	3.92611e-94	0.979475	0.774	0.125	5.61591e-90	My2	arhgef15
860	1.47701e-92	2.74254	0.869	0.193	2.11272e-88	My2	ccl35.2
861	5.42408e-77	1.61878	0.949	0.311	7.7586e-73	My2	si:dkey-33i11.9
862	4.4004e-70	0.944376	0.591	0.096	6.29433e-66	My2	si:ch211-274k16.2
863	1.78177e-67	1.09011	0.62	0.111	2.54865e-63	My2	grn2
864	3.57252e-67	3.10373	0.978	0.446	5.11013e-63	My2	ccl35.1
865	2.4079e-66	2.07567	0.978	0.422	3.44426e-62	My2	grn1
866	8.4601e-66	1.23958	0.861	0.226	1.21013e-61	My2	id2a
867	4.65474e-62	1.75354	0.577	0.104	6.65815e-58	My2	BX323596.2
868	3.80126e-51	1.22433	1	0.482	5.43733e-47	My2	lygl1
869	5.9316e-51	1.49451	1	0.956	8.48456e-47	My2	cd74a
870	1.07194e-50	1.83309	0.964	0.594	1.5333e-46	My2	tcima
871	6.05472e-48	1.26591	0.956	0.437	8.66066e-44	My2	mpeg1.1
872	1.4036e-46	1.37559	0.985	0.79	2.00771e-42	My2	zgc:103700
873	4.14815e-46	1.22904	0.876	0.366	5.93351e-42	My2	si:busm1-194e12.11
874	2.16105e-40	1.87032	0.693	0.238	3.09117e-36	My2	tnfb
875	3.74649e-40	1.12732	0.993	0.886	5.35898e-36	My2	cd74b
876	5.06108e-40	1.5965	0.766	0.297	7.23936e-36	My2	si:ch73-335l21.4
877	3.36844e-38	1.20426	1	0.863	4.81822e-34	My2	si:busm1-266f07.2
878	4.16231e-38	0.819651	0.825	0.293	5.95377e-34	My2	irf8
879	2.66406e-36	2.1137	0.409	0.089	3.81067e-32	My2	cxcl11.6
880	6.33871e-35	1.31091	0.934	0.599	9.0669e-31	My2	mhc2b
881	5.43075e-34	0.87749	0.496	0.126	7.76815e-30	My2	krt8
882	1.30484e-33	0.970158	0.964	0.578	1.86644e-29	My2	psap
883	6.23866e-31	1.00109	0.949	0.739	8.92378e-27	My2	marcksl1a
884	2.67696e-29	0.894153	0.489	0.149	3.82912e-25	My2	si:ch1073-385f13.3
885	3.53245e-29	0.931539	0.759	0.305	5.05282e-25	My2	krt18b
886	7.94711e-28	1.08439	0.701	0.291	1.13675e-23	My2	BX120005.1
887	5.05057e-27	0.973783	0.569	0.192	7.22434e-23	My2	plekhf1
888	2.15571e-24	1.00477	0.964	0.889	3.08352e-20	My2	zgc:162730
889	2.74017e-24	0.958478	0.336	0.081	3.91954e-20	My2	tnfrsf18
890	1.75937e-22	1.21486	0.774	0.424	2.5166e-18	My2	rgs2
891	3.26705e-22	0.952065	0.62	0.257	4.67319e-18	My2	si:ch211-79k12.1
892	1.6928e-20	0.865622	0.876	0.579	2.42139e-16	My2	ccl19a.1
893	1.39772e-16	1.35297	0.438	0.165	1.9993e-12	My2	cxcl11.5
894	9.04232e-16	0.955305	0.891	0.678	1.29341e-11	My2	cxcr4b
895	5.01034e-15	0.974798	0.927	0.834	7.16679e-11	My2	jdp2b
896	2.86691e-13	1.00247	0.299	0.104	4.10083e-09	My2	marcksl1b
897	3.67698e-09	0.957094	0.131	0.034	5.25956e-05	My2	cxcl11.1
898	4.7081e-09	0.833209	0.628	0.428	6.73447e-05	My2	bcl2l10
899	0.000540926	0.83407	0.358	0.235	1	My2	gadd45bb
900	0.0096335	0.958756	0.343	0.273	1	My2	hspb1
901	0	2.75203	0.868	0.008	0	My3	gpm6aa
902	0	2.64814	0.947	0.012	0	My3	snap25a
903	0	1.98578	0.789	0.006	0	My3	snap25b
904	0	1.90092	0.763	0.006	0	My3	sncb
905	0	1.71234	0.711	0.003	0	My3	stmn4
906	0	1.49915	0.684	0.004	0	My3	c1qtnf4
907	0	1.40247	0.684	0.004	0	My3	nrxn1a
908	0	1.39041	0.684	0.002	0	My3	stxbp1a
909	2.52874e-306	1.6854	0.684	0.004	3.6171e-302	My3	atp6v0cb
910	2.50724e-290	1.37591	0.605	0.003	3.58635e-286	My3	vamp2
911	7.61204e-266	1.616	0.553	0.003	1.08883e-261	My3	sypb
912	7.99775e-246	2.02691	0.605	0.005	1.144e-241	My3	neurod1
913	2.28264e-241	1.42938	0.553	0.004	3.26508e-237	My3	elavl4
914	2.36541e-234	1.3016	0.474	0.002	3.38348e-230	My3	olfm1a
915	1.38375e-224	1.2825	0.579	0.005	1.97932e-220	My3	zic1
916	4.41152e-222	2.00286	0.737	0.012	6.31024e-218	My3	gpm6ab
917	8.91024e-222	1.47522	0.605	0.006	1.27452e-217	My3	nova2
918	2.38592e-215	1.38582	0.553	0.005	3.41282e-211	My3	gng3
919	1.74351e-212	1.77265	0.526	0.004	2.49391e-208	My3	syt1a
920	4.10262e-212	1.2961	0.526	0.004	5.86838e-208	My3	fez1
921	8.14327e-209	1.51244	0.447	0.003	1.16481e-204	My3	chga
922	2.74877e-208	1.4553	0.579	0.006	3.93185e-204	My3	aplp1
923	3.57553e-203	1.51602	0.605	0.008	5.11443e-199	My3	zic2a
924	4.09304e-202	1.46389	0.579	0.007	5.85468e-198	My3	ndrg4
925	4.0503e-198	1.62812	0.579	0.007	5.79355e-194	My3	tuba1c
926	3.7152e-195	1.41302	0.526	0.005	5.31422e-191	My3	clstn1
927	6.66623e-181	2.12243	0.605	0.01	9.53538e-177	My3	rtn1a
928	4.98685e-180	1.26828	0.447	0.004	7.13319e-176	My3	rtn1b
929	2.41672e-179	1.55075	0.632	0.011	3.45688e-175	My3	stx1b
930	6.85517e-174	1.45759	0.447	0.004	9.80563e-170	My3	elavl3
931	5.53104e-171	1.21131	0.5	0.006	7.9116e-167	My3	map1aa
932	8.72921e-163	1.62874	0.395	0.003	1.24863e-158	My3	egr4
933	2.39232e-156	1.18858	0.395	0.004	3.42198e-152	My3	nebl
934	1.5111e-151	1.26416	0.5	0.008	2.16148e-147	My3	eno2
935	2.56023e-129	2.24678	0.579	0.014	3.66215e-125	My3	stmn1b
936	5.21319e-115	1.52862	0.421	0.008	7.45695e-111	My3	nat16
937	1.60649e-110	2.0686	0.447	0.01	2.29792e-106	My3	map1ab
938	1.7195e-93	1.5508	0.553	0.02	2.45957e-89	My3	zbtb18
939	9.06908e-75	1.38652	0.605	0.034	1.29724e-70	My3	ndrg3b
940	3.62026e-59	1.28282	0.447	0.022	5.17842e-55	My3	nptna
941	4.56945e-55	1.27267	0.658	0.057	6.53614e-51	My3	cpe
942	1.27006e-36	2.52212	0.868	0.186	1.8167e-32	My3	calm3a
943	7.4424e-33	2.31385	0.711	0.124	1.06456e-28	My3	qkia
944	1.71765e-27	1.72766	0.632	0.106	2.45692e-23	My3	marcksl1b
945	6.54466e-21	1.30678	0.5	0.087	9.36148e-17	My3	hmgb3a
946	6.96127e-18	1.22706	0.211	0.018	9.9574e-14	My3	zgc:122979
947	4.03861e-15	1.49749	0.395	0.071	5.77683e-11	My3	mbpa
948	7.38533e-13	1.39303	0.632	0.222	1.0564e-08	My3	calm2b
949	6.6339e-12	1.25072	0.711	0.293	9.48913e-08	My3	tob1b
950	3.54871e-10	2.04172	0.5	0.172	5.07607e-06	My3	atp2b1a
951	0	1.74187	0.8	0.001	0	Mix	ctsbb
952	0	1.1025	0.7	0.001	0	Mix	p2rx3b
953	1.25654e-137	1.09429	0.5	0.005	1.79735e-133	Mix	ighv1-4
954	1.4895e-134	1.25524	0.8	0.016	2.13058e-130	Mix	sftpba
955	9.5563e-123	2.68966	0.9	0.024	1.36693e-118	Mix	ponzr6
956	2.46187e-58	1.49481	0.85	0.049	3.52146e-54	Mix	enpp1
957	1.58594e-42	1.08494	0.7	0.044	2.26852e-38	Mix	ifi46
958	3.07582e-42	1.41832	0.5	0.023	4.39966e-38	Mix	hbegfa
959	7.37501e-42	1.11331	0.55	0.028	1.05492e-37	Mix	gpr132b
960	1.92159e-34	1.42623	0.7	0.059	2.74865e-30	Mix	cyb561a3a
961	1.91135e-28	1.65657	0.95	0.136	2.734e-24	Mix	spock3
962	4.24538e-27	1.30157	0.8	0.097	6.07258e-23	Mix	spg21
963	3.78722e-25	1.9985	0.95	0.149	5.41724e-21	Mix	sftpbb
964	8.26516e-24	2.10055	0.95	0.186	1.18225e-19	Mix	cd83
965	3.02139e-19	1.01762	0.75	0.118	4.3218e-15	Mix	gstm.1
966	3.95257e-19	2.96956	0.95	0.253	5.65376e-15	Mix	lgals2a
967	1.24339e-17	2.06101	0.8	0.169	1.77855e-13	Mix	dusp5
968	1.34881e-16	1.66876	0.7	0.121	1.92934e-12	Mix	ctsla
969	1.50929e-16	1.40184	0.95	0.237	2.15889e-12	Mix	cd81a
970	2.19653e-16	1.03518	0.5	0.06	3.14191e-12	Mix	klf2a
971	8.7283e-16	2.2798	1	0.414	1.2485e-11	Mix	fth1a
972	3.36406e-14	1.66809	0.7	0.135	4.81195e-10	Mix	ascc1
973	8.13352e-14	1.51357	0.7	0.141	1.16342e-09	Mix	rasgef1ba
974	1.14141e-13	1.95447	0.85	0.288	1.63267e-09	Mix	rnaset2l
975	4.31041e-13	1.22701	0.65	0.132	6.1656e-09	Mix	nme2b.2
976	2.29556e-11	2.52874	0.9	0.403	3.28357e-07	Mix	ctss2.1
977	4.47885e-11	1.33781	0.95	0.347	6.40655e-07	Mix	top1l
978	1.83159e-10	1.18195	0.8	0.252	2.61991e-06	Mix	ncf1
979	6.94546e-10	2.28942	0.85	0.416	9.93478e-06	Mix	bhlhe40
980	2.22878e-09	1.18281	0.7	0.191	3.18805e-05	Mix	nr4a3
981	3.76333e-09	1.22342	0.75	0.265	5.38306e-05	Mix	ponzr1
982	9.11885e-09	1.17573	0.9	0.465	0.000130436	Mix	SERP1
983	1.71801e-08	1.05694	0.7	0.219	0.000245744	Mix	ccl35.2
984	3.75937e-08	1.02079	0.8	0.313	0.000537741	Mix	sdcbp2
985	3.99457e-08	1.93483	0.9	0.422	0.000571384	Mix	nfkbiaa
986	5.15538e-08	1.15386	0.95	0.529	0.000737426	Mix	si:ch211-102c2.4
987	1.26761e-07	1.67996	0.9	0.467	0.00181319	Mix	ccl35.1
988	1.57311e-07	1.53317	0.95	0.782	0.00225018	Mix	jun
989	2.31535e-07	1.20651	0.9	0.45	0.00331188	Mix	crip1
990	2.82828e-07	1.13372	0.6	0.193	0.00404558	Mix	pde4ba
991	3.59623e-07	1.19406	0.8	0.313	0.00514405	Mix	irf8
992	3.81584e-07	1.84434	0.65	0.238	0.00545818	Mix	cxcr4a
993	7.276e-07	1.03372	1	0.892	0.0104076	Mix	zgc:162730
994	2.20067e-06	1.02556	0.8	0.322	0.0314784	Mix	krt18b
995	2.63571e-06	1.12556	1	0.686	0.0377012	Mix	cxcr4b
996	1.46183e-05	1.00545	0.7	0.313	0.2091	Mix	rsl1d1
997	1.92176e-05	1.13113	0.9	0.481	0.274889	Mix	ctss2.2
998	3.0364e-05	1.08945	0.85	0.688	0.434327	Mix	sec61g
999	4.8e-05	1.01569	0.9	0.57	0.686592	Mix	fthl27
1000	0.000372106	1.47026	0.7	0.435	1	Mix	bcl2l10
