# Supplementary material for: A single-cell transcriptomic atlas reveals resident dendritic-like cells in the zebrafish brain parenchyma
Source: eLife. 2025 Dec 11;13:RP91427. doi: 10.7554/eLife.91427 (PMC12698085; doi:10.7554/eLife.91427)
Supplement: Supplementary file 3. [file elife-91427-supp3.xlsx]

## Sheet: DEG MF vs MG
	p_val	avg_log2FC	pct.1	pct.2	p_val_adj
sftpbb	1.44324e-64	1.48949	0.541	0.049	2.0644e-60
ahnak	3.61562e-62	1.52653	0.599	0.084	5.17179e-58
krt8	3.80974e-59	2.10513	0.669	0.133	5.44946e-55
krt18b	1.74025e-57	1.97829	0.826	0.267	2.48925e-53
socs3b	3.52882e-54	0.656885	0.349	0.011	5.04763e-50
f13a1b	5.00973e-54	0.916481	0.355	0.014	7.16592e-50
apoc1	1.03277e-53	-2.08906	0.744	0.999	1.47728e-49
lgals3bpb	7.82535e-53	-1.75289	0.89	0.997	1.11934e-48
s100a10b	6.22912e-52	2.45301	0.407	0.032	8.91013e-48
si:dkey-5n18.1	1.90048e-49	1.39332	0.634	0.134	2.71845e-45
hspa8	2.22683e-49	1.02042	1	0.963	3.18526e-45
rasgef1ba	1.65509e-48	1.36444	0.785	0.25	2.36744e-44
icn	3.04318e-46	2.17671	0.36	0.028	4.35296e-42
nr4a3	1.70314e-45	1.3143	0.628	0.155	2.43618e-41
anxa4	1.84175e-44	0.996897	0.622	0.151	2.63443e-40
pnp5a	3.98668e-44	0.84894	0.442	0.056	5.70254e-40
fosl2	1.66624e-43	0.897543	0.686	0.169	2.38339e-39
atf4b	4.86287e-43	0.942324	0.86	0.319	6.95586e-39
anxa5b	1.39166e-42	0.692089	0.256	0.005	1.99063e-38
si:ch211-136m16.8	1.44491e-42	0.572978	0.326	0.022	2.0668e-38
si:ch211-165i18.2	2.23181e-41	1.23854	0.436	0.066	3.19238e-37
fthl27	4.13427e-40	1.68708	0.878	0.47	5.91366e-36
tmsb1	4.15495e-40	0.930259	0.442	0.07	5.94324e-36
apoeb	4.20254e-40	-1.90508	0.483	0.938	6.01132e-36
BX640512.3	1.59423e-39	0.420009	0.233	0.004	2.28039e-35
ptp4a2b	3.93404e-39	0.816701	0.587	0.138	5.62725e-35
ccl34b.1	1.30946e-38	-1.42553	0.791	1	1.87305e-34
bzw1b	2.89057e-38	1.19762	0.779	0.303	4.13467e-34
si:ch211-194m7.3	3.07807e-38	0.635232	0.331	0.028	4.40288e-34
flna	4.89992e-38	0.484498	0.25	0.009	7.00884e-34
btg1	4.90728e-38	1.10008	0.93	0.615	7.01937e-34
NPC2 (1 of many)	9.50434e-38	1.05299	0.523	0.117	1.3595e-33
sik1	2.27318e-37	0.617587	0.43	0.066	3.25156e-33
rnd3a	2.28888e-37	0.473718	0.273	0.015	3.27401e-33
actb2	4.23618e-37	1.13249	1	0.999	6.05944e-33
timp2b	9.41254e-37	0.960929	0.326	0.03	1.34637e-32
tagln2	7.11815e-36	0.69393	0.273	0.018	1.01818e-31
eef1a1l1	2.76366e-35	0.942726	1	0.959	3.95314e-31
anxa1a	4.43861e-35	1.09056	0.215	0.005	6.34899e-31
zgc:174904	5.47674e-35	0.943582	0.221	0.006	7.83393e-31
chmp4ba	9.02436e-35	0.810179	0.64	0.188	1.29084e-30
trib3	2.15616e-34	0.722997	0.506	0.108	3.08417e-30
si:dkey-79d12.5	4.14817e-34	0.782579	0.552	0.139	5.93354e-30
anxa2a	4.46942e-34	0.874784	0.221	0.008	6.39306e-30
cmip	2.689e-33	0.463461	0.401	0.065	3.84634e-29
nocta	3.27476e-33	0.672775	0.558	0.137	4.68422e-29
crip1	3.99328e-33	1.28371	0.587	0.184	5.71199e-29
tubb4b	4.34627e-33	0.871937	0.936	0.631	6.21691e-29
serp1	4.72315e-33	0.553966	0.43	0.079	6.75599e-29
pfkfb3	5.26796e-33	0.98568	0.61	0.184	7.53529e-29
crema	9.67145e-33	0.457836	0.395	0.063	1.3834e-28
trpv1	1.83787e-32	0.353826	0.302	0.03	2.6289e-28
zgc:152830	9.93527e-32	0.828506	0.57	0.167	1.42114e-27
f11r.1	1.3384e-31	0.619146	0.424	0.08	1.91445e-27
gstt1a	1.56009e-31	0.616234	0.238	0.015	2.23156e-27
gapdhs	2.45324e-31	0.814569	0.808	0.343	3.50911e-27
ndel1b	2.56283e-31	0.342927	0.291	0.029	3.66588e-27
cebpb	2.86332e-31	1.12903	0.971	0.792	4.09569e-27
nr4a1	3.65972e-31	1.08746	0.785	0.394	5.23487e-27
fam129bb	1.23468e-30	0.275238	0.192	0.005	1.76609e-26
hsp90ab1	3.09976e-30	0.71545	1	0.967	4.4339e-26
si:ch211-194m7.4	3.99451e-30	0.392024	0.244	0.018	5.71375e-26
gsto2	7.16115e-30	0.83267	0.36	0.061	1.02433e-25
chmp5b	1.22664e-29	0.470195	0.465	0.105	1.75458e-25
rhoab	1.48389e-29	0.644395	0.558	0.153	2.12255e-25
eif1b	1.76843e-29	0.723185	0.779	0.336	2.52956e-25
chmp4bb	3.1768e-29	0.707903	0.581	0.176	4.5441e-25
si:dkey-187i8.2	6.68993e-29	0.296181	0.169	0.003	9.56928e-25
ahsa1b	6.69747e-29	0.543169	0.535	0.142	9.58006e-25
pmp22b	6.92305e-29	0.775893	0.174	0.004	9.90274e-25
pnrc2	7.57848e-29	0.876743	0.93	0.681	1.08403e-24
chmp2a	8.38143e-29	0.522957	0.5	0.123	1.19888e-24
prelid3b	1.13319e-28	0.755155	0.762	0.322	1.62092e-24
mcl1a	1.18322e-28	0.805975	0.988	0.911	1.69248e-24
bach1b	1.84266e-28	0.601093	0.39	0.076	2.63574e-24
zfand2a	2.24818e-28	0.678556	0.459	0.112	3.2158e-24
ccl34a.4	2.40027e-28	1.50542	0.297	0.039	3.43334e-24
wsb1	6.60773e-28	0.488545	0.477	0.118	9.4517e-24
sec61b	1.06517e-27	0.67761	0.634	0.227	1.52362e-23
arf6b	1.54165e-27	0.459538	0.384	0.075	2.20518e-23
CABZ01020840.1	1.9058e-27	0.779914	0.419	0.096	2.72606e-23
sptlc2b	5.86702e-27	0.808021	0.517	0.156	8.39219e-23
pim1	7.78341e-27	0.714941	0.535	0.155	1.11334e-22
cited4a	1.05686e-26	0.431401	0.308	0.044	1.51174e-22
ch25h	1.13376e-26	-1.82228	0.424	0.753	1.62173e-22
havcr1	1.61567e-26	-1.24091	0.581	0.849	2.31105e-22
si:ch211-214j24.10	1.6708e-26	0.446565	0.424	0.096	2.38992e-22
efhd2	1.96556e-26	0.35455	0.262	0.03	2.81154e-22
kdm6ba	2.17922e-26	0.62691	0.506	0.141	3.11716e-22
si:ch211-152p11.4	2.28624e-26	0.304023	0.221	0.018	3.27023e-22
nme2b.1	2.40608e-26	0.901936	0.983	0.858	3.44166e-22
ccnl1b	3.66478e-26	0.54352	0.448	0.112	5.2421e-22
ppiaa	4.33248e-26	0.82405	0.977	0.802	6.19718e-22
cib1	4.73815e-26	0.319091	0.285	0.038	6.77745e-22
slc22a21	6.29319e-26	-0.934422	0.866	0.902	9.00178e-22
eef2b	1.0924e-25	0.717423	0.971	0.768	1.56257e-21
brd2a	1.31173e-25	0.505393	0.483	0.127	1.8763e-21
dusp5	1.57877e-25	0.8589	0.488	0.148	2.25828e-21
ak2	1.87989e-25	0.417183	0.39	0.084	2.689e-21
sat1a.2	3.43845e-25	0.96289	0.959	0.838	4.91835e-21
fthl31	8.80518e-25	0.510655	0.378	0.084	1.25949e-20
atp6v1g1	1.4941e-24	0.615682	0.831	0.39	2.13717e-20
havcr2	1.53083e-24	-1.0996	0.459	0.768	2.1897e-20
ets2	1.60187e-24	0.552562	0.587	0.194	2.29132e-20
si:ch73-335l21.1	2.07754e-24	0.26112	0.174	0.009	2.97171e-20
cacybp	8.00118e-24	0.331689	0.314	0.056	1.14449e-19
tdh	1.17139e-23	0.373409	0.233	0.027	1.67556e-19
cirbpb	1.34218e-23	0.797717	0.977	0.791	1.91985e-19
zfand5a	1.98854e-23	0.575477	0.552	0.18	2.8444e-19
npl	2.07179e-23	0.540504	0.459	0.133	2.96349e-19
rsrp1	4.59354e-23	0.721911	0.855	0.471	6.57059e-19
pkma	5.2285e-23	0.549827	0.587	0.212	7.47885e-19
xaf1	6.02969e-23	0.486702	0.465	0.137	8.62487e-19
egr2a	6.03651e-23	0.547803	0.355	0.077	8.63463e-19
nfkbiaa	7.47736e-23	1.02253	0.651	0.264	1.06956e-18
prdx5	7.66046e-23	0.578153	0.442	0.127	1.09575e-18
nck1b	8.01424e-23	0.400032	0.39	0.094	1.14636e-18
cdkn1cb	1.3153e-22	0.305805	0.209	0.022	1.88141e-18
sqstm1	2.19067e-22	1.02069	0.616	0.25	3.13354e-18
spi1b	2.36708e-22	0.682654	0.837	0.46	3.38588e-18
ndrg1a	2.70661e-22	0.323741	0.203	0.02	3.87154e-18
si:dkey-151g10.6	6.68808e-22	0.677697	1	0.986	9.56663e-18
zgc:136870	8.58316e-22	0.44212	0.372	0.09	1.22773e-17
hmox1a	1.42269e-21	1.3746	0.407	0.122	2.03501e-17
uba52	1.49887e-21	0.610882	1	0.933	2.14398e-17
chchd2	1.74521e-21	0.59569	0.448	0.139	2.49635e-17
slco2b1	1.80724e-21	-1.11041	0.407	0.7	2.58508e-17
tfeb	2.02236e-21	0.270901	0.198	0.02	2.89278e-17
aldoaa	2.79485e-21	0.62589	0.599	0.236	3.99775e-17
RPS17	2.91091e-21	0.642184	0.994	0.84	4.16377e-17
zgc:64065	4.16478e-21	0.284448	0.192	0.019	5.95731e-17
dynll1	4.4659e-21	1.01624	0.587	0.242	6.38802e-17
map1lc3b	5.05536e-21	0.38864	0.378	0.095	7.23119e-17
hist2h2l	5.08016e-21	0.50494	0.436	0.124	7.26666e-17
fam76b	5.418e-21	0.385402	0.366	0.087	7.7499e-17
ywhaba	6.6876e-21	0.439793	0.581	0.213	9.56594e-17
eef1b2	7.13979e-21	0.609325	0.959	0.769	1.02128e-16
higd1a	7.79048e-21	0.627727	0.721	0.34	1.11435e-16
dnajb1a	8.36889e-21	0.300289	0.25	0.039	1.19709e-16
tpt1	1.07863e-20	0.603059	0.959	0.829	1.54287e-16
ahr2	1.08436e-20	0.393461	0.401	0.109	1.55106e-16
slc25a5	1.10131e-20	0.595258	0.988	0.925	1.57532e-16
c1qb	1.10335e-20	1.06085	0.814	0.529	1.57823e-16
kdm7aa	1.11705e-20	0.335258	0.436	0.117	1.59783e-16
zbtb16a	1.06978e-19	0.3197	0.267	0.049	1.53021e-15
ncl	1.12257e-19	0.37557	0.651	0.242	1.60573e-15
nfil3-6	1.17431e-19	0.841279	0.558	0.227	1.67973e-15
nrros	1.1928e-19	0.648475	0.512	0.189	1.70618e-15
eif3jb	1.23526e-19	0.384987	0.448	0.134	1.76692e-15
si:dkey-112a7.4	1.434e-19	0.433065	0.349	0.09	2.0512e-15
ccl34b.8	1.49336e-19	0.733017	0.198	0.024	2.1361e-15
gstp1	1.67157e-19	0.383292	0.227	0.034	2.39101e-15
pcyt2	1.86265e-19	0.362313	0.297	0.063	2.66433e-15
vps13c	1.89618e-19	0.355041	0.273	0.052	2.71229e-15
erh	1.90897e-19	0.420009	0.622	0.242	2.73059e-15
mafbb	2.57276e-19	0.837961	0.581	0.251	3.68007e-15
ddx3xa	2.80043e-19	0.378766	0.349	0.089	4.00574e-15
si:ch211-283g2.2	2.85483e-19	0.611133	0.43	0.146	4.08354e-15
cycsb	3.82658e-19	0.692455	0.645	0.307	5.47354e-15
si:dkey-26c10.5	4.60029e-19	-1.03841	0.308	0.602	6.58026e-15
si:dkey-206d17.12	5.32476e-19	0.418151	0.471	0.148	7.61654e-15
ppiab	6.35645e-19	0.741456	0.884	0.587	9.09226e-15
si:ch211-74m13.3	7.43826e-19	0.461307	0.703	0.309	1.06397e-14
CABZ01080702.1	7.65685e-19	0.301257	0.221	0.034	1.09524e-14
faua	7.66339e-19	0.511925	0.994	0.904	1.09617e-14
pfn2	9.4094e-19	0.454589	0.442	0.141	1.34592e-14
bcl10	9.51976e-19	0.283619	0.203	0.028	1.36171e-14
sec23b	9.88878e-19	0.274785	0.221	0.034	1.41449e-14
klf2a	1.0104e-18	0.609148	0.215	0.033	1.44528e-14
grn1	1.24863e-18	1.82608	0.686	0.409	1.78605e-14
h3f3d	1.30594e-18	0.561021	0.831	0.471	1.86801e-14
slc25a25a	1.36404e-18	0.426656	0.442	0.139	1.95112e-14
grap2b	1.6065e-18	0.417856	0.448	0.148	2.29794e-14
ccni	2.08017e-18	0.426955	0.657	0.283	2.97547e-14
pfn1	2.28935e-18	0.625107	1	0.971	3.27468e-14
ophn1	2.55393e-18	0.299651	0.267	0.053	3.65315e-14
rnf144b	2.96603e-18	0.299812	0.244	0.044	4.24262e-14
myh9a	4.33218e-18	0.277051	0.267	0.053	6.19675e-14
gpx1a	4.43956e-18	0.757501	0.68	0.343	6.35034e-14
ube2al	4.66664e-18	0.43054	0.401	0.12	6.67516e-14
chac1	4.70938e-18	0.499423	0.68	0.302	6.7363e-14
rack1	5.92097e-18	0.588698	0.977	0.876	8.46935e-14
lxn	6.97569e-18	0.414428	0.349	0.096	9.97803e-14
kpna3	7.86902e-18	0.270231	0.244	0.046	1.12558e-13
aldh9a1a.1	1.00284e-17	0.359924	0.291	0.067	1.43446e-13
lgals2a	1.18077e-17	0.879727	0.767	0.447	1.68898e-13
wbp2	1.32753e-17	0.294544	0.273	0.058	1.89891e-13
cndp2	1.67572e-17	0.505642	0.599	0.265	2.39695e-13
sec61g	1.77969e-17	0.55592	0.866	0.535	2.54567e-13
pglyrp5	2.26898e-17	0.380221	0.116	0.005	3.24555e-13
slc25a3b	2.87525e-17	0.477338	0.709	0.34	4.11275e-13
ndufb3	3.97403e-17	0.327402	0.355	0.099	5.68445e-13
cpeb4b	4.66847e-17	0.317647	0.32	0.082	6.67778e-13
bcl2l10	4.70853e-17	1.0403	0.378	0.124	6.73508e-13
myd88	4.86651e-17	0.369153	0.337	0.091	6.96106e-13
fth1a	4.86817e-17	1.04095	0.558	0.24	6.96343e-13
grn2	4.8692e-17	0.458381	0.244	0.049	6.9649e-13
si:ch211-1o7.3	8.33025e-17	0.371646	0.355	0.104	1.19156e-12
atp6v1f	8.73911e-17	0.332118	0.448	0.152	1.25004e-12
hnrnpa0b	1.04313e-16	0.497177	0.483	0.18	1.4921e-12
eef1db	1.07321e-16	0.408348	0.651	0.278	1.53512e-12
RPL37A	1.09907e-16	0.493272	0.983	0.9	1.5721e-12
pepd	1.13893e-16	0.422432	0.529	0.212	1.62912e-12
ubc	1.23025e-16	0.509629	0.919	0.722	1.75975e-12
slc25a33	1.26759e-16	0.521708	0.378	0.117	1.81316e-12
c1qa	1.54682e-16	0.795961	0.779	0.506	2.21257e-12
capgb	1.86768e-16	0.356314	0.279	0.067	2.67152e-12
marcksl1b	2.3761e-16	0.808226	0.372	0.123	3.39877e-12
bloc1s6	2.61815e-16	0.351133	0.424	0.144	3.745e-12
ybx1	3.27011e-16	0.487209	0.965	0.778	4.67757e-12
pdcd6ip	3.28009e-16	0.302644	0.326	0.09	4.69184e-12
si:dkey-180p18.9	3.31345e-16	0.374866	0.349	0.104	4.73956e-12
birc2	3.52521e-16	0.302111	0.273	0.065	5.04246e-12
snd1	3.63612e-16	0.263505	0.279	0.066	5.20111e-12
SERP1	4.19764e-16	0.50915	0.599	0.272	6.00431e-12
si:dkey-15j16.3	4.26997e-16	0.323733	0.192	0.03	6.10776e-12
gabarapa	7.11784e-16	0.339636	0.419	0.141	1.01814e-11
ucp2	9.1418e-16	0.485275	0.506	0.205	1.30764e-11
vdac2	9.63145e-16	0.510906	0.523	0.223	1.37768e-11
cd99	9.65618e-16	0.380409	0.366	0.114	1.38122e-11
egr3	1.00268e-15	0.41284	0.378	0.118	1.43423e-11
si:dkey-27h10.2	1.03619e-15	-0.800946	0.256	0.564	1.48217e-11
ctsh	1.09745e-15	-0.990581	0.628	0.773	1.56979e-11
stip1	1.12212e-15	0.417007	0.419	0.15	1.60508e-11
mcl1b	1.16962e-15	0.630499	0.872	0.529	1.67302e-11
clic2	1.43358e-15	0.739459	0.744	0.449	2.0506e-11
mdh1aa	1.44543e-15	0.512727	0.692	0.355	2.06754e-11
vps37c	1.72897e-15	0.292414	0.262	0.061	2.47312e-11
hspe1	2.28108e-15	0.48328	0.424	0.156	3.26285e-11
si:zfos-741a10.3	2.47826e-15	-0.79026	0.273	0.569	3.54491e-11
ssh2a	2.61007e-15	0.250581	0.209	0.039	3.73344e-11
eif3f	2.65206e-15	0.44909	0.831	0.52	3.79351e-11
mtpn	2.83144e-15	0.337269	0.372	0.122	4.05009e-11
si:busm1-266f07.2	2.84799e-15	-0.81798	1	1	4.07376e-11
mafba	2.8678e-15	0.456196	0.424	0.157	4.10211e-11
selenow1	3.9679e-15	0.447151	0.593	0.262	5.67568e-11
cox6b2	4.56784e-15	0.448621	0.709	0.354	6.53384e-11
sowahd	4.61301e-15	0.294414	0.32	0.093	6.59844e-11
b2m	5.30725e-15	-0.883955	0.977	0.989	7.59149e-11
atp6v1d	5.50709e-15	0.281181	0.302	0.084	7.87735e-11
ivns1abpa	5.63387e-15	0.252583	0.192	0.033	8.05869e-11
plecb	5.69982e-15	0.456191	0.517	0.215	8.15302e-11
mibp2	5.88385e-15	0.523925	0.808	0.516	8.41625e-11
uqcr10	5.92251e-15	0.330423	0.36	0.113	8.47156e-11
atp5mc3b	6.35538e-15	0.516923	0.738	0.397	9.09073e-11
lamtor5	7.10474e-15	0.319343	0.32	0.094	1.01626e-10
ist1	7.35434e-15	0.361331	0.413	0.144	1.05197e-10
plaua	9.21836e-15	0.429432	0.221	0.046	1.31859e-10
ip6k2b	1.07985e-14	0.320473	0.337	0.103	1.54461e-10
fxyd1	1.24949e-14	0.327626	0.413	0.146	1.78727e-10
alox5ap	1.36007e-14	-0.883651	0.413	0.646	1.94544e-10
btf3	1.38363e-14	0.503125	0.855	0.646	1.97915e-10
cdc42se1	1.41633e-14	0.26857	0.267	0.068	2.02592e-10
alas1	1.46537e-14	0.362541	0.279	0.076	2.09606e-10
cd74b	1.46952e-14	-0.619076	1	0.999	2.102e-10
glud1b	1.47341e-14	0.290726	0.273	0.072	2.10757e-10
eif4ebp1	1.49429e-14	0.370293	0.622	0.276	2.13744e-10
atp6v0ca	1.73046e-14	0.465976	0.907	0.676	2.47524e-10
prdx2	2.12768e-14	0.450298	0.61	0.292	3.04343e-10
chmp1b	2.16689e-14	0.405008	0.453	0.174	3.09952e-10
blnk	2.60941e-14	0.25705	0.262	0.066	3.7325e-10
fermt3b	2.87574e-14	0.262521	0.291	0.08	4.11347e-10
nupr1a	2.92277e-14	0.340426	0.314	0.095	4.18072e-10
mhc1zba	2.96356e-14	-0.987138	0.895	0.924	4.23907e-10
mdh2	3.33026e-14	0.403418	0.488	0.203	4.7636e-10
plekho1b	3.48157e-14	0.430473	0.663	0.342	4.98003e-10
eif3c	4.03357e-14	0.362111	0.483	0.193	5.76962e-10
hif1al	4.79925e-14	0.290726	0.337	0.105	6.86484e-10
si:dkey-25e12.3	4.89943e-14	0.304054	0.267	0.072	7.00814e-10
hspa4a	5.67121e-14	0.692204	0.674	0.388	8.11211e-10
romo1	5.67499e-14	0.450463	0.628	0.303	8.11751e-10
TXN	6.593e-14	0.42823	0.709	0.373	9.43063e-10
cd74a	6.78781e-14	-0.505042	1	1	9.70928e-10
oaz1b	7.02857e-14	0.382149	0.512	0.218	1.00537e-09
caprin1b	7.11085e-14	0.279718	0.314	0.094	1.01714e-09
myl12.1	8.1767e-14	0.358939	0.733	0.375	1.1696e-09
smdt1b	8.25628e-14	0.283347	0.308	0.093	1.18098e-09
ube2v2	8.54497e-14	0.33825	0.587	0.262	1.22227e-09
fkbp4	9.0818e-14	0.351326	0.238	0.06	1.29906e-09
cct5	1.01538e-13	0.355461	0.43	0.167	1.4524e-09
rab1ab	1.05711e-13	0.272504	0.453	0.171	1.51209e-09
eef1g	1.41047e-13	0.455542	0.983	0.839	2.01753e-09
slc30a1a	1.59402e-13	0.534478	0.669	0.376	2.28008e-09
eif5a	1.69756e-13	0.343573	0.488	0.205	2.42819e-09
ap2m1a	2.34939e-13	0.322127	0.395	0.15	3.36056e-09
edf1	2.61495e-13	0.330015	0.442	0.176	3.74042e-09
sh3glb1a	2.66626e-13	0.268956	0.291	0.087	3.81382e-09
jun	2.68481e-13	-0.946014	0.512	0.771	3.84035e-09
zgc:103700	2.71318e-13	-0.540852	0.994	0.996	3.88093e-09
cxcr3.2	3.06724e-13	0.421574	0.622	0.304	4.38737e-09
eef1da	3.49656e-13	0.419739	0.733	0.411	5.00148e-09
slc25a55a	4.58212e-13	0.293074	0.349	0.118	6.55427e-09
ccl19a.1	5.14763e-13	-0.710371	0.238	0.541	7.36317e-09
serbp1a	5.91631e-13	0.41507	0.826	0.561	8.46268e-09
hspd1	6.02095e-13	0.436157	0.384	0.147	8.61236e-09
kpnb1	6.15785e-13	0.278235	0.279	0.082	8.80819e-09
zgc:77650	6.41526e-13	0.412407	0.599	0.28	9.17639e-09
arl5c	6.65976e-13	0.453979	0.686	0.362	9.52612e-09
dpp7	8.05688e-13	0.419104	0.558	0.266	1.15246e-08
uqcrh	8.26685e-13	0.321234	0.436	0.176	1.18249e-08
si:dkey-112e7.2	8.60022e-13	0.394198	0.64	0.324	1.23018e-08
spi1a	9.4535e-13	0.344958	0.564	0.257	1.35223e-08
etnk1	1.19355e-12	0.307432	0.337	0.115	1.70726e-08
hcls1	1.23516e-12	0.333148	0.605	0.286	1.76677e-08
coq10b	1.36908e-12	0.412588	0.448	0.185	1.95834e-08
nop53	1.39622e-12	0.276945	0.419	0.162	1.99715e-08
jak1	1.41678e-12	0.310496	0.494	0.203	2.02656e-08
eif3ha	1.43609e-12	0.293644	0.424	0.167	2.05418e-08
npc2	1.44539e-12	-0.712459	0.907	0.921	2.06749e-08
oaz1a	1.6557e-12	0.302677	0.541	0.236	2.36832e-08
COX5B	1.82319e-12	0.402884	0.552	0.26	2.60789e-08
pabpc1a	1.87101e-12	0.455333	0.913	0.692	2.6763e-08
grasp	2.01036e-12	0.360267	0.401	0.156	2.87563e-08
spty2d1	2.14056e-12	0.272559	0.308	0.098	3.06185e-08
atf4a	2.50455e-12	0.417157	0.663	0.347	3.58252e-08
rab8b	2.62145e-12	0.348816	0.494	0.221	3.74972e-08
atp5meb	2.6679e-12	0.280079	0.477	0.198	3.81616e-08
rnf19a	2.67282e-12	0.257908	0.256	0.072	3.82321e-08
eif4a1a	2.7488e-12	0.460651	0.587	0.305	3.93188e-08
atp5l	2.75013e-12	0.33377	0.628	0.304	3.93379e-08
cox7b	3.01676e-12	0.379525	0.465	0.203	4.31517e-08
mbd2	3.14817e-12	0.281181	0.267	0.08	4.50314e-08
sh3bp5la	3.15674e-12	0.261678	0.302	0.098	4.5154e-08
h1fx	3.46071e-12	0.971875	0.576	0.333	4.9502e-08
serf2	3.62361e-12	0.321456	0.547	0.251	5.18322e-08
mhc1uba	3.71032e-12	-1.03902	0.895	0.943	5.30724e-08
ptgis	3.80821e-12	0.291944	0.209	0.049	5.44726e-08
rab2a	3.87549e-12	0.295955	0.401	0.156	5.5435e-08
gdi2	3.94963e-12	0.333453	0.465	0.203	5.64955e-08
ptp4a1	4.06273e-12	0.25875	0.308	0.101	5.81133e-08
ms4a17a.10	4.40809e-12	-0.895515	0.936	0.923	6.30533e-08
tcp1	4.42491e-12	0.268226	0.355	0.128	6.32939e-08
itpkcb	5.05739e-12	0.259792	0.343	0.119	7.23409e-08
fkbp1aa	5.11381e-12	0.301662	0.564	0.26	7.31479e-08
si:ch211-102c2.4	5.11452e-12	-0.596338	0.797	0.82	7.31581e-08
uqcrq	5.18969e-12	0.268293	0.378	0.141	7.42333e-08
ywhaz	5.34963e-12	0.297152	0.39	0.152	7.65212e-08
ppdpfb	5.45091e-12	0.368653	0.407	0.161	7.79699e-08
gabarapb	5.86194e-12	0.341857	0.715	0.369	8.38492e-08
hsp70.3	6.71943e-12	0.668964	0.965	0.935	9.61147e-08
tmem59	7.01655e-12	-0.649562	0.32	0.546	1.00365e-07
slc40a1	7.77765e-12	0.307046	0.308	0.105	1.11251e-07
eif3g	8.7737e-12	0.31755	0.529	0.242	1.25499e-07
sec61a1	9.59248e-12	0.379384	0.494	0.236	1.37211e-07
socs3a	1.13531e-11	-1.02661	0.541	0.759	1.62395e-07
lgals9l1	1.24763e-11	-0.936677	0.541	0.763	1.78461e-07
fgl2a	1.41629e-11	0.637149	0.628	0.357	2.02585e-07
vdac3	1.7034e-11	0.297558	0.378	0.148	2.43654e-07
cebpa	1.75515e-11	0.521353	0.657	0.371	2.51057e-07
rab1ba	1.75772e-11	0.274922	0.267	0.085	2.51424e-07
ywhae1	1.81285e-11	0.250946	0.384	0.148	2.59311e-07
atp6v1e1b	2.14854e-11	0.300064	0.581	0.281	3.07328e-07
h2afx1	2.27485e-11	0.672851	0.727	0.535	3.25395e-07
tpi1b	2.38398e-11	0.289855	0.616	0.294	3.41004e-07
cox7c	2.60088e-11	0.31658	0.378	0.153	3.7203e-07
nfe2l2a	2.82435e-11	0.326762	0.587	0.283	4.03996e-07
litaf	2.83546e-11	0.281728	0.552	0.255	4.05584e-07
si:dkey-177p2.6	2.9837e-11	0.343047	0.634	0.321	4.26789e-07
selenop	3.55034e-11	0.605878	0.442	0.213	5.07841e-07
lasp1	4.46124e-11	0.281175	0.442	0.19	6.38136e-07
junba	4.4785e-11	0.483813	0.791	0.527	6.40604e-07
naca	4.71422e-11	0.413258	0.965	0.856	6.74322e-07
eno3	4.96971e-11	0.395119	0.552	0.281	7.10868e-07
eif3s10	5.38978e-11	0.267939	0.436	0.184	7.70955e-07
csf2rb	5.39385e-11	0.385274	0.529	0.257	7.71536e-07
si:ch73-158p21.3	5.658e-11	-0.73166	0.523	0.657	8.0932e-07
nsa2	6.53927e-11	0.333678	0.663	0.354	9.35377e-07
eif3m	7.1594e-11	0.334378	0.587	0.297	1.02408e-06
hspa9	7.29065e-11	0.284068	0.32	0.117	1.04285e-06
arf5	8.10033e-11	0.272218	0.366	0.143	1.15867e-06
nccrp1	9.75805e-11	0.415271	0.308	0.115	1.39579e-06
arpc4l	1.10297e-10	0.288535	0.541	0.253	1.57769e-06
ivns1abpb	1.36519e-10	0.30004	0.378	0.158	1.95277e-06
ahcy	1.46427e-10	0.302699	0.297	0.109	2.09449e-06
cst14a.2	1.82454e-10	0.266699	0.413	0.179	2.60983e-06
herpud1	1.9137e-10	0.297668	0.314	0.118	2.73736e-06
eif4a1b	1.96969e-10	0.300616	0.465	0.209	2.81745e-06
slc20a1b	2.50206e-10	0.603395	0.738	0.501	3.57894e-06
atp5f1b	2.67135e-10	0.337751	0.587	0.303	3.8211e-06
cct7	3.23587e-10	0.283237	0.424	0.188	4.62858e-06
si:ch73-1a9.3	3.52119e-10	0.536156	0.541	0.265	5.0367e-06
oser1	3.56074e-10	0.357935	0.413	0.185	5.09329e-06
si:ch211-153b23.7	5.06301e-10	0.310409	0.279	0.101	7.24213e-06
lygl1	5.11819e-10	0.567529	0.826	0.681	7.32105e-06
dnaja2a	5.2659e-10	0.254648	0.395	0.167	7.53234e-06
mapk11	6.03807e-10	0.285869	0.378	0.163	8.63685e-06
clk4a	6.86888e-10	0.304127	0.407	0.177	9.82525e-06
histh1l	7.06122e-10	0.615168	0.413	0.196	1.01004e-05
samsn1a	7.5541e-10	0.302889	0.401	0.181	1.08054e-05
ifi30	7.78641e-10	-0.814342	0.831	0.886	1.11377e-05
pmaip1	8.17516e-10	0.553677	0.709	0.459	1.16938e-05
atp5f1e	8.25109e-10	0.251907	0.407	0.18	1.18024e-05
BX004816.2	8.39981e-10	-0.698698	0.442	0.643	1.20151e-05
ncf1	9.89347e-10	0.558992	0.564	0.311	1.41516e-05
tax1bp1b	1.04768e-09	0.255804	0.285	0.106	1.4986e-05
abca1a	1.08626e-09	0.28535	0.314	0.118	1.55379e-05
ctsa	1.10588e-09	0.358943	0.628	0.349	1.58185e-05
cox7a2l	1.1226e-09	0.256204	0.331	0.133	1.60576e-05
rassf2a	1.15112e-09	0.290726	0.442	0.213	1.64656e-05
cited4b	1.15974e-09	0.289981	0.326	0.129	1.65889e-05
si:dkey-27i16.2	1.18941e-09	0.582939	0.959	0.94	1.70133e-05
ran	1.19823e-09	0.309225	0.779	0.498	1.71395e-05
cox6c	1.47464e-09	0.264854	0.448	0.212	2.10932e-05
gnpda1	1.52668e-09	0.265374	0.442	0.207	2.18376e-05
vps4b	1.57224e-09	0.276035	0.297	0.114	2.24893e-05
atp5pb	1.60371e-09	0.309956	0.448	0.214	2.29394e-05
ctss2.1	1.65436e-09	0.70507	0.698	0.483	2.3664e-05
actb1	1.74742e-09	0.319504	0.983	0.965	2.49951e-05
cd99l2	2.06804e-09	-0.530063	0.227	0.45	2.95812e-05
hsp90aa1.2	2.54721e-09	0.64475	0.983	0.968	3.64353e-05
arpc2	2.68899e-09	0.321162	0.692	0.422	3.84633e-05
dnase2	2.89453e-09	0.345394	0.488	0.255	4.14033e-05
pgam1a	3.10243e-09	0.261233	0.36	0.155	4.43772e-05
atp5fa1	3.19086e-09	0.275765	0.448	0.214	4.5642e-05
wipf1b	3.56357e-09	0.286426	0.413	0.196	5.09733e-05
fosab	3.97015e-09	-0.758065	0.797	0.928	5.67891e-05
bhlhe40	4.21245e-09	0.507703	0.581	0.346	6.02549e-05
mid1ip1b	4.38499e-09	0.299041	0.209	0.066	6.27229e-05
entpd2a.1	4.85119e-09	0.336508	0.419	0.207	6.93914e-05
dnase1l1	4.97443e-09	0.300018	0.407	0.195	7.11543e-05
scn4bb	7.49777e-09	-0.705617	0.25	0.449	0.000107248
lonrf1l	7.60558e-09	0.297701	0.233	0.081	0.00010879
zgc:123107	8.66291e-09	-0.561998	0.279	0.474	0.000123914
CABZ01076275.1	9.05077e-09	0.262238	0.262	0.099	0.000129462
si:dkey-262k9.4	9.49368e-09	0.32749	0.57	0.295	0.000135798
cox6a1	9.69943e-09	0.319933	0.541	0.295	0.000138741
parvg	1.03502e-08	0.289519	0.267	0.105	0.000148049
csf1ra	1.05331e-08	0.289372	0.459	0.233	0.000150665
cyfip1	1.13777e-08	0.251081	0.448	0.223	0.000162746
si:ch211-212k18.7	1.21727e-08	-0.70967	0.814	0.795	0.000174119
copb2	1.22158e-08	0.306975	0.285	0.114	0.000174735
rab5aa	1.26691e-08	0.255102	0.372	0.171	0.000181218
grb2b	1.50279e-08	0.270783	0.436	0.213	0.00021496
fosl1a	1.73419e-08	0.423781	0.517	0.288	0.000248058
cd83	1.77674e-08	0.311587	0.477	0.241	0.000254145
arpc1b	1.80395e-08	0.295493	0.924	0.721	0.000258037
rgs5b	2.18881e-08	0.514402	0.337	0.155	0.000313088
timp4.3	2.94565e-08	0.328201	0.384	0.176	0.000421346
si:ch73-86n18.1	3.11657e-08	-0.535738	0.308	0.523	0.000445794
mfap4	3.1366e-08	0.276205	0.541	0.327	0.000448659
si:cabz01074946.1	3.24654e-08	0.291508	0.512	0.275	0.000464386
eif3ea	3.30364e-08	0.274347	0.645	0.384	0.000472553
itm2ba	3.45914e-08	-0.515582	0.727	0.75	0.000494795
glula	3.7306e-08	-0.786822	0.599	0.692	0.000533625
zgc:153317	3.7433e-08	0.44772	0.372	0.179	0.000535442
prokr1a	3.89426e-08	-0.475078	0.198	0.389	0.000557035
hbegfb	4.23392e-08	-0.479342	0.169	0.39	0.000605621
adh5	4.69151e-08	0.26515	0.308	0.137	0.000671074
hsp70.2	5.03966e-08	0.530708	0.878	0.829	0.000720874
msna	5.35772e-08	0.340518	0.645	0.387	0.000766369
si:dkey-238d18.5	5.43581e-08	0.264586	0.25	0.098	0.000777538
smox	5.65812e-08	0.332958	0.791	0.511	0.000809337
klf6a	7.97087e-08	0.484234	0.89	0.762	0.00114015
si:dkey-102g19.3	9.68706e-08	0.609034	0.517	0.298	0.00138564
rab5c	1.00178e-07	0.257654	0.424	0.214	0.00143295
ccl35.1	1.05652e-07	0.371909	0.773	0.597	0.00151124
atp1a1a.1	1.06929e-07	0.256011	0.424	0.219	0.00152951
ndufa4l	1.12815e-07	0.295747	0.698	0.437	0.00161371
rsl24d1	1.22866e-07	0.328613	0.866	0.681	0.00175748
slc2a3b	1.30048e-07	0.292141	0.337	0.155	0.0018602
si:ch211-132p1.3	1.41508e-07	-0.696674	0.238	0.411	0.00202413
cotl1	1.50486e-07	0.297708	0.878	0.711	0.00215255
ssr3	1.76098e-07	0.268618	0.628	0.368	0.0025189
nucb1	1.76424e-07	-0.540476	0.384	0.518	0.00252357
hspbp1	1.80382e-07	0.552479	0.413	0.223	0.00258019
cirbpa	1.94044e-07	0.279846	0.855	0.626	0.00277561
ssr2	2.29598e-07	0.284552	0.587	0.34	0.00328417
metrnla	2.34032e-07	0.251426	0.279	0.123	0.0033476
csf1rb	2.51615e-07	-0.550576	0.453	0.574	0.00359909
pdia3	2.57275e-07	0.251819	0.605	0.349	0.00368006
cox4i1	2.59871e-07	0.296492	0.785	0.537	0.0037172
zgc:64051	3.08611e-07	-0.590095	0.878	0.881	0.00441437
ldhba	3.49625e-07	0.281356	0.372	0.191	0.00500103
ccng2	3.74542e-07	0.375954	0.663	0.42	0.00535745
psap	4.09567e-07	-0.498139	0.86	0.904	0.00585844
odc1	4.4566e-07	0.304362	0.453	0.25	0.00637472
laptm5	5.19887e-07	-0.456522	0.924	0.93	0.00743647
tgm2l	5.73872e-07	-0.601387	0.32	0.499	0.00820866
cxcl8a	6.47678e-07	0.578414	0.221	0.086	0.00926438
c1qc	6.93765e-07	0.558991	0.872	0.8	0.00992361
CABZ01080568.1	6.95994e-07	-0.937462	0.785	0.766	0.0099555
mhc2b	7.51725e-07	-0.517959	0.837	0.892	0.0107527
ddx5	8.9377e-07	0.40122	0.808	0.627	0.0127845
gm2a	1.04813e-06	-0.484425	0.715	0.762	0.0149925
slc43a3b	1.47075e-06	0.517807	0.279	0.133	0.0210376
si:ch211-264f5.2	1.62735e-06	0.298204	0.238	0.103	0.0232777
ncf2	2.23974e-06	0.256103	0.343	0.18	0.0320373
ubb	2.36609e-06	0.26989	0.953	0.872	0.0338445
si:dkey-33i11.1	3.68437e-06	-0.419258	0.267	0.423	0.0527013
sdcbp2	3.72898e-06	0.258339	0.628	0.399	0.0533394
ctss2.2	4.81709e-06	0.264442	0.919	0.8	0.0689036
tob1a	4.83944e-06	0.270176	0.436	0.243	0.0692234
jund	4.85067e-06	0.270948	0.651	0.413	0.0693839
CABZ01001434.1	6.22892e-06	0.283421	0.39	0.212	0.0890985
ctsba	8.09838e-06	0.367783	0.901	0.688	0.115839
bsg	1.12769e-05	-0.445971	0.785	0.736	0.161305
h2afvb	1.331e-05	0.469448	0.349	0.204	0.190387
midn	1.39252e-05	0.261747	0.558	0.342	0.199186
eno1a	1.47213e-05	0.254648	0.326	0.176	0.210574
sh3gl3a	1.48956e-05	0.261233	0.291	0.15	0.213067
UBB	2.02315e-05	0.4164	0.884	0.833	0.289391
tuba8l	2.11024e-05	0.318262	0.279	0.144	0.301848
si:ch211-274k16.2	2.27051e-05	-0.523446	0.058	0.185	0.324774
dhrs9	2.71362e-05	-0.463246	0.366	0.483	0.388156
sec11a	3.81722e-05	-0.423191	0.192	0.33	0.546016
dnajb1b	3.86996e-05	0.257174	0.965	0.921	0.553558
ptx4	4.55825e-05	-0.261098	0.058	0.181	0.652012
dusp1	6.46586e-05	0.285026	0.581	0.39	0.924876
asah1b	8.57106e-05	-0.681313	0.767	0.719	1
insig1	9.57581e-05	-0.335815	0.145	0.279	1
cfp	0.000112838	0.287242	0.576	0.401	1
irf8	0.000115091	-0.341409	0.209	0.35	1
stoml3b	0.000123781	0.394612	0.477	0.313	1
cxcl11.5	0.000124644	-0.820221	0.07	0.188	1
zgc:152863	0.00014725	-0.331875	0.081	0.196	1
marco	0.00021105	0.531932	0.68	0.605	1
ccr2	0.000237255	-0.353663	0.122	0.238	1
mt2	0.000338713	0.758148	0.134	0.058	1
mrc1b	0.000590036	0.276371	0.826	0.677	1
mgst1.2	0.000640495	-0.36049	0.302	0.408	1
si:dkey-7j14.6	0.000688704	-0.395398	0.419	0.479	1
cxcl11.6	0.000769517	-0.410678	0.035	0.12	1
zgc:172090	0.000865442	-0.334206	0.163	0.272	1
plin2	0.00104923	0.556386	0.279	0.172	1
mcamb	0.00107013	-0.373925	0.465	0.546	1
cmklr1	0.00135161	-0.326854	0.541	0.617	1
rnaset2l	0.00152324	-0.394127	0.448	0.497	1
rnf213a	0.00185564	-0.418373	0.465	0.518	1
irf1b	0.00201183	-0.320466	0.099	0.19	1
slc3a2a	0.00205575	0.285857	0.709	0.56	1
si:ch211-191c10.1	0.0023162	-0.268835	0.169	0.264	1
lgmn	0.00248328	0.286201	0.517	0.378	1
mpeg1.1	0.00252253	-0.324152	0.692	0.7	1
si:ch211-213a13.1	0.00268617	-0.285579	0.157	0.248	1
zgc:174863	0.00280366	-0.463185	0.401	0.463	1
cd9a	0.00293428	-0.293337	0.209	0.302	1
b2ml	0.00306844	-0.283726	0.953	0.943	1
si:dkey-32n7.4	0.00344009	-0.276694	0.256	0.347	1
tmbim4	0.00394716	-0.255307	0.157	0.246	1
srgap3	0.00454735	-0.292828	0.169	0.253	1
fzd2	0.00599226	-0.312515	0.326	0.393	1
cblb	0.00617432	-0.271237	0.203	0.288	1
vmp1	0.00640782	0.45751	0.663	0.611	1
mfng	0.00865697	-0.28351	0.43	0.478	1
aste1a	0.00915232	-0.251909	0.052	0.118	1
BX897691.1	0.00930086	-0.309159	0.174	0.251	1
slc3a2b	0.0100109	-0.376619	0.256	0.318	1
si:ch211-79k12.1	0.0100143	-0.26685	0.157	0.236	1
CU459094.3	0.0118669	-0.523266	0.122	0.198	1
itgae.2	0.0125603	-0.350491	0.57	0.567	1
prss16	0.013162	-0.274569	0.227	0.294	1
CABZ01068358.1	0.0135702	-0.277391	0.343	0.407	1
si:dkey-33i11.9	0.0150426	-0.268636	0.151	0.224	1
hmgn2	0.0174669	0.901727	0.605	0.682	1
BX682234.1	0.0181865	-0.256662	0.157	0.226	1
tmem176l.4	0.0201097	-0.268572	0.174	0.246	1
cst3	0.0209112	-0.279829	0.669	0.617	1
si:dkey-192g7.3	0.0218779	-0.58898	0.57	0.541	1
tnfaip3	0.0247977	-0.260565	0.151	0.214	1
naga	0.025763	-0.366406	0.622	0.573	1
ctsk	0.0274541	-0.258167	0.448	0.477	1
CABZ01088428.1	0.0287796	-0.285096	0.093	0.151	1
cd63	0.0313108	-0.424778	0.948	0.899	1
caspb	0.0357215	-0.327165	0.343	0.379	1
fabp11a	0.0461594	0.436933	0.238	0.175	1
atp6ap2	0.057331	-0.322085	0.68	0.596	1
kctd12.2	0.0930285	-0.284667	0.43	0.425	1
ctsz	0.0993591	-0.373132	0.64	0.575	1
BX323596.2	0.117609	-0.533984	0.145	0.184	1
hamp	0.189865	-0.438918	0.215	0.264	1
hsp70.1	0.250726	0.258627	0.733	0.763	1
anxa3b	0.264964	-0.33992	0.686	0.663	1
tnfb	0.271341	-0.564777	0.256	0.278	1
epd	0.372937	0.849109	0.099	0.119	1
mxc	0.378603	-0.314029	0.186	0.204	1
hspb1	0.486285	0.617949	0.413	0.445	1
egr1	0.552078	-0.410037	0.535	0.452	1
gadd45ba	0.589538	-0.566045	0.442	0.408	1

## Sheet: DEG DC-like vs MG
	p_val	avg_log2FC	pct.1	pct.2	p_val_adj
chl1a	5.88112e-215	2.36854	0.934	0.022	8.41236e-211
siglec15l	6.84617e-209	3.32832	0.939	0.049	9.79277e-205
hepacam2	4.11431e-188	2.08564	0.909	0.061	5.88512e-184
ccl19a.1	1.97262e-177	4.60909	1	0.541	2.82164e-173
lgals3bpb	4.8009e-166	-3.86478	0.653	0.997	6.86721e-162
apoc1	3.02514e-161	-4.71286	0.866	0.999	4.32716e-157
ccl34b.1	7.40328e-161	-3.6909	0.676	1	1.05897e-156
si:dkey-23a13.11	1.40228e-150	1.41232	0.727	0.02	2.00582e-146
zgc:171686	6.9091e-150	1.50579	0.719	0.018	9.88278e-146
il12rb2l	1.47571e-149	1.50006	0.757	0.038	2.11085e-145
id2a	1.21251e-147	2.01928	0.79	0.072	1.73437e-143
slc22a21	1.01098e-138	-2.30035	0.119	0.902	1.44611e-134
ehbp1l1b	5.92535e-136	1.45775	0.797	0.099	8.47562e-132
fcer1gl	5.28982e-134	-2.42569	0.278	0.925	7.56656e-130
apoeb	4.09675e-130	-3.79892	0.506	0.938	5.85999e-126
cyth4a	5.46985e-124	1.2198	0.633	0.022	7.82407e-120
havcr1	1.08778e-123	-2.41833	0.091	0.849	1.55597e-119
rac2	1.20146e-121	1.5675	0.97	0.449	1.71857e-117
ms4a17a.10	1.87818e-118	-2.54445	0.458	0.923	2.68655e-114
BX927333.1	1.68225e-116	1.00182	0.554	0.001	2.40629e-112
fes	7.15205e-116	1.0159	0.597	0.019	1.02303e-111
wipf1a	8.8021e-111	1.09388	0.62	0.039	1.25905e-106
si:dkeyp-94g1.1	2.51793e-109	1.01246	0.557	0.013	3.60164e-105
spock3	5.04264e-109	1.14461	0.547	0.009	7.21299e-105
hcst	9.17732e-109	1.0017	0.58	0.023	1.31272e-104
cd74a	1.97874e-108	-1.2619	1	1	2.83039e-104
actb1	2.97741e-108	1.49736	1	0.965	4.25889e-104
pigrl4.2	5.39417e-108	1.01409	0.57	0.02	7.71582e-104
c1qc	2.85197e-107	-2.06282	0.099	0.8	4.07946e-103
def6a	5.47438e-107	1.25861	0.597	0.035	7.83055e-103
flt3	7.48041e-107	0.90675	0.534	0.008	1.07e-102
cmtm7	1.00607e-106	1.09737	0.63	0.054	1.43908e-102
actn1	4.90108e-106	1.01247	0.544	0.014	7.0105e-102
ptprja	1.17722e-104	1.03651	0.638	0.06	1.68389e-100
havcr2	4.73362e-104	-1.83385	0.071	0.768	6.77097e-100
arhgap12b	2.21096e-102	1.23384	0.742	0.15	3.16256e-98
epdl1	1.39938e-101	1.20128	0.638	0.062	2.00167e-97
crybg1a	8.17883e-101	0.903968	0.494	0.003	1.1699e-96
nck1a	2.4804e-97	1.42698	0.775	0.205	3.54797e-93
fam49ba	1.48267e-96	1.20301	0.714	0.144	2.12081e-92
si:ch211-215e19.6	5.74768e-95	0.850947	0.499	0.013	8.22149e-91
cnn3a	7.96099e-95	0.946378	0.476	0.005	1.13874e-90
tspan36	3.10231e-94	-1.87131	0.058	0.721	4.43755e-90
ank2b	4.90784e-91	0.826197	0.453	0.003	7.02017e-87
si:dkey-238d18.5	8.13904e-90	0.956118	0.651	0.098	1.16421e-85
xcr1a.1	1.82653e-88	0.815695	0.486	0.019	2.61268e-84
slco2b1	3.08375e-88	-1.71832	0.066	0.7	4.411e-84
zgc:162730	1.89626e-87	1.34951	1	0.938	2.7124e-83
arhgef15	9.14878e-87	0.959156	0.572	0.061	1.30864e-82
mrc1b	1.29421e-86	-1.68361	0.053	0.677	1.85123e-82
c1qtnf5	3.76258e-86	0.742035	0.433	0.003	5.38199e-82
sdc4	2.77592e-84	-2.39559	0.2	0.743	3.97068e-80
scinlb	4.51775e-84	0.754575	0.468	0.018	6.46218e-80
gpatch8	4.91954e-84	1.02446	0.696	0.141	7.03691e-80
iqsec1b	8.57774e-84	0.728939	0.425	0.004	1.22696e-79
kdm2ba	1.07762e-83	0.930976	0.514	0.039	1.54143e-79
bcl2l10	1.95746e-83	1.09751	0.663	0.124	2.79995e-79
alox5ap	8.10406e-82	-1.60725	0.043	0.646	1.1592e-77
abi3a	1.17562e-80	1.08546	0.668	0.153	1.6816e-76
rgs2	4.33497e-80	1.82037	0.904	0.523	6.20074e-76
hsp70.2	6.35926e-79	1.20914	0.992	0.829	9.09629e-75
si:dkey-33c9.6	1.22912e-78	0.65546	0.43	0.013	1.75813e-74
tiam1a	1.50407e-78	0.717938	0.438	0.015	2.15142e-74
lcp1	6.89269e-78	1.11629	0.699	0.183	9.85931e-74
dapp1	9.60273e-78	0.824279	0.468	0.032	1.37357e-73
nme2b.2	2.37316e-77	0.734065	0.433	0.016	3.39457e-73
si:dkey-216e24.9	9.07037e-77	0.795161	0.494	0.041	1.29743e-72
plekho2	1.60402e-76	1.06096	0.762	0.234	2.29439e-72
2012-09-01	2.76822e-76	0.858723	0.577	0.085	3.95966e-72
prkcba	5.35147e-74	0.716678	0.443	0.025	7.65474e-70
mical3a	1.73679e-73	0.699442	0.408	0.014	2.48431e-69
si:ch211-119e14.1	2.76851e-73	0.770389	0.468	0.035	3.96007e-69
arhgdig	1.08548e-72	1.0265	0.977	0.659	1.55267e-68
gng2	1.30163e-72	0.713443	0.405	0.014	1.86186e-68
marco	1.88278e-72	-1.50634	0.046	0.605	2.69313e-68
fybb	2.3529e-72	1.07393	0.754	0.267	3.36559e-68
ctss1	2.87655e-72	0.595168	0.382	0.006	4.11461e-68
si:dkey-26c10.5	7.67115e-72	-1.40892	0.048	0.602	1.09728e-67
cdk6	1.66762e-71	0.647449	0.382	0.008	2.38536e-67
tmem178	1.95473e-71	0.618017	0.362	0.001	2.79605e-67
si:ch211-113g11.6	2.97574e-71	0.761782	0.37	0.004	4.2565e-67
lgals9l1	1.64722e-70	-2.00832	0.306	0.763	2.35618e-66
slc12a7b	2.2461e-70	0.587363	0.367	0.004	3.21283e-66
si:busm1-57f23.1	5.46135e-70	0.714898	0.433	0.027	7.81192e-66
arvcfb	1.57452e-69	0.586179	0.349	0	2.25219e-65
il21r.1	2.70912e-69	0.837708	0.605	0.119	3.87513e-65
desi2	8.69295e-69	0.815529	0.549	0.093	1.24344e-64
pik3ap1	5.02453e-68	0.619307	0.397	0.018	7.18708e-64
hsp70l	7.34806e-68	1.24004	1	0.957	1.05107e-63
kazald3	2.55898e-67	0.786409	0.527	0.081	3.66037e-63
dennd2db	3.0452e-67	0.628416	0.385	0.015	4.35585e-63
BX897691.1	5.10697e-67	1.12196	0.749	0.251	7.30501e-63
fgf12a	7.23251e-67	0.606653	0.342	0.001	1.03454e-62
si:ch211-222l21.1	1.01526e-66	0.838288	0.484	0.056	1.45223e-62
scpep1	1.14662e-66	-1.30704	0.291	0.743	1.64013e-62
arpc5b	5.33496e-66	0.92278	0.641	0.172	7.63113e-62
csf1rb	1.43589e-65	-1.18524	0.048	0.574	2.0539e-61
slc3a2a	1.47387e-65	-1.15513	0.041	0.56	2.10822e-61
rgs13	1.97268e-65	1.05675	0.701	0.213	2.82172e-61
aif1l	5.80436e-65	0.997006	0.749	0.248	8.30256e-61
si:zfos-741a10.3	2.74155e-64	-1.17289	0.056	0.569	3.92152e-60
plxnc1	6.70117e-64	0.964115	0.775	0.293	9.58535e-60
mcamb	1.58685e-63	-1.21278	0.035	0.546	2.26984e-59
ipcef1	2.43762e-63	0.616463	0.387	0.023	3.48677e-59
wasb	6.16776e-63	0.925145	0.927	0.506	8.82237e-59
cmklr1	1.34863e-62	-1.13338	0.111	0.617	1.92908e-58
pfn1	1.70279e-62	0.929109	1	0.971	2.43567e-58
fgd4b	5.58992e-62	0.769858	0.532	0.103	7.99582e-58
c1qb	2.25688e-61	-1.23464	0.03	0.529	3.22824e-57
nrxn2a	2.37597e-61	0.566584	0.311	0	3.39859e-57
cadm4	2.64657e-61	0.78941	0.542	0.104	3.78566e-57
dub	4.23515e-61	0.519996	0.327	0.005	6.05796e-57
znf385a	4.70134e-61	0.499168	0.314	0.001	6.7248e-57
hsp90aa1.2	6.10101e-61	0.988087	1	0.968	8.72689e-57
fmnl1a	1.67824e-59	0.696212	0.494	0.081	2.40055e-55
dock10	2.01749e-59	0.768075	0.613	0.153	2.88582e-55
zmp:0000001139	8.02184e-59	0.538287	0.316	0.005	1.14744e-54
hcls1	9.36459e-59	0.968977	0.732	0.286	1.33951e-54
si:dkeyp-117b11.1	1.10633e-58	0.520709	0.319	0.006	1.58249e-54
dnajb1b	2.39505e-58	0.987651	0.995	0.921	3.42588e-54
si:dkey-192g7.3	2.89856e-58	-1.6641	0.061	0.541	4.14609e-54
ctsh	3.03435e-58	-1.44731	0.43	0.773	4.34034e-54
afap1l2	3.47151e-58	0.501521	0.329	0.01	4.96565e-54
asap2b	9.27282e-58	0.518512	0.329	0.011	1.32638e-53
rab5aa	1.90088e-57	0.879025	0.61	0.171	2.71902e-53
cd63	1.99754e-57	-1.40868	0.803	0.899	2.85728e-53
ctsz	2.01245e-57	-1.37625	0.106	0.575	2.87861e-53
tpm1	2.83415e-57	0.519223	0.322	0.009	4.05397e-53
si:ch73-86n18.1	2.90445e-57	-1.15022	0.048	0.523	4.15452e-53
ero1b	6.27127e-57	0.731337	0.527	0.108	8.97043e-53
junba	8.16254e-57	1.09959	0.937	0.527	1.16757e-52
tbc1d10b	1.16804e-56	0.620346	0.418	0.049	1.67076e-52
c1qa	1.8375e-56	-1.16595	0.035	0.506	2.62835e-52
UBB	2.81409e-56	1.12227	0.975	0.833	4.02527e-52
s1pr1	3.18342e-56	0.561752	0.296	0.003	4.55357e-52
krt18b	3.96351e-56	1.01217	0.742	0.267	5.6694e-52
crim1	5.45925e-56	0.549272	0.365	0.027	7.80891e-52
batf3	1.43248e-55	0.658584	0.438	0.06	2.04902e-51
grn1	2.42645e-55	1.70674	0.815	0.409	3.4708e-51
ifi30	5.0356e-55	-1.60046	0.759	0.886	7.20292e-51
specc1	9.73247e-55	0.608883	0.392	0.042	1.39213e-50
spag1a	3.19837e-54	0.615431	0.435	0.063	4.57495e-50
atp1b1a	5.65163e-54	-1.41486	0.17	0.611	8.08409e-50
dhrs9	1.05454e-53	-0.962689	0.028	0.483	1.50842e-49
CR385050.1	1.37419e-53	0.604139	0.4	0.047	1.96564e-49
sema4ab	2.3615e-53	0.636313	0.446	0.068	3.37789e-49
si:ch1073-392o20.2	2.40401e-53	-1.12871	0.137	0.584	3.43869e-49
CABZ01111959.1	3.46494e-53	0.695661	0.539	0.119	4.95626e-49
slc9a3r1a	4.82748e-53	0.583135	0.392	0.047	6.90522e-49
si:dkey-33i11.9	7.68394e-53	0.799505	0.678	0.224	1.09911e-48
mylipb	8.1773e-53	0.450546	0.301	0.009	1.16968e-48
plekhf1	1.02524e-52	1.45041	0.61	0.194	1.46651e-48
tpm3	1.26392e-52	0.812272	0.638	0.21	1.80791e-48
il12ba	2.45642e-52	0.595878	0.268	0	3.51366e-48
CR759843.2	4.25355e-52	-1.29306	0.028	0.47	6.08428e-48
atp2b1a	6.60774e-52	0.665722	0.423	0.063	9.45171e-48
hsp70.3	8.13426e-52	0.931673	0.997	0.935	1.16353e-47
ubb	1.26066e-51	0.976693	0.987	0.872	1.80324e-47
zgc:154125	1.56113e-51	-0.874394	0.043	0.484	2.23304e-47
msi1	2.40662e-51	0.407714	0.263	0	3.44242e-47
irf8	2.80612e-51	1.02028	0.752	0.35	4.01388e-47
socs3a	4.6543e-51	1.2471	0.967	0.759	6.65752e-47
si:ch211-153b23.7	1.01447e-50	0.672276	0.491	0.101	1.45109e-46
pik3r3a	1.01595e-50	0.696187	0.506	0.113	1.45321e-46
mpzl2b	6.9336e-50	-0.909196	0.013	0.436	9.91783e-46
parm1	2.64783e-49	0.41594	0.266	0.004	3.78745e-45
arhgap4b	3.60123e-49	0.482835	0.316	0.022	5.1512e-45
cdc42l	5.85293e-49	0.81033	0.886	0.507	8.37203e-45
tmsb4x	6.85333e-49	0.674587	1	0.999	9.803e-45
nrd1a	1.01559e-48	0.533859	0.319	0.023	1.4527e-44
ptprc	1.2939e-48	0.831144	0.722	0.304	1.85079e-44
pik3cd	1.44238e-48	0.547044	0.337	0.03	2.06318e-44
hsp70.1	2.26106e-48	1.26011	0.952	0.763	3.23422e-44
CMKLR1 (1 of many)	2.75952e-48	0.460399	0.273	0.008	3.94721e-44
si:ch73-95l15.5	3.18002e-48	0.457935	0.268	0.006	4.5487e-44
yrk	3.5973e-48	0.554835	0.423	0.074	5.14558e-44
kcnq5b	6.27428e-48	0.479847	0.334	0.029	8.97473e-44
ctsd	1.77821e-47	-1.1319	0.142	0.56	2.54355e-43
irf2	2.51888e-47	0.687101	0.592	0.174	3.603e-43
slc15a4	2.81006e-47	0.727863	0.699	0.247	4.01951e-43
tsc22d3	3.37989e-47	1.12756	0.914	0.58	4.83459e-43
ms4a17a.9	3.58094e-47	-0.933858	0.013	0.418	5.12217e-43
vmp1	3.87445e-47	-1.21991	0.192	0.611	5.54202e-43
tgm2l	4.07216e-47	-1.22725	0.084	0.499	5.82482e-43
si:ch211-212k18.7	3.14774e-46	-1.20275	0.547	0.795	4.50253e-42
phf20b	5.43337e-46	0.578225	0.438	0.085	7.77189e-42
ctss2.2	7.11042e-46	-1.08869	0.587	0.8	1.01707e-41
dok2	8.67785e-46	0.590344	0.403	0.068	1.24128e-41
gnaia	9.50061e-46	0.6417	0.428	0.08	1.35897e-41
tiparp	1.68085e-45	0.670118	0.327	0.033	2.40429e-41
nav3	2.30786e-45	0.561288	0.405	0.068	3.30117e-41
sh3kbp1	2.43277e-45	0.596074	0.451	0.098	3.47984e-41
bahcc1b	2.71903e-45	0.473727	0.309	0.025	3.8893e-41
si:ch211-102c2.4	3.5246e-45	-0.94144	0.582	0.82	5.04159e-41
mcl1b	4.66169e-45	0.901052	0.873	0.529	6.66809e-41
zgc:101810	4.7627e-45	0.375424	0.246	0.004	6.81257e-41
rab8b	6.81988e-45	0.739151	0.615	0.221	9.75516e-41
sult4a1	6.86137e-45	0.442627	0.268	0.011	9.81451e-41
arpc1b	1.43622e-44	0.75411	0.962	0.721	2.05436e-40
mcl1a	1.47199e-44	0.933715	0.987	0.911	2.10554e-40
si:ch211-79k12.1	2.0528e-44	0.79905	0.635	0.236	2.93633e-40
plxnb1b	2.34515e-44	0.394971	0.251	0.006	3.35451e-40
ncam1a	2.783e-44	0.443926	0.233	0.001	3.98081e-40
fgd4a	5.04363e-44	0.406885	0.261	0.01	7.2144e-40
scn4bb	6.39415e-44	-1.04226	0.051	0.449	9.14619e-40
plpp3	8.99074e-44	0.397603	0.23	0.001	1.28603e-39
ikzf1	1.03324e-43	0.474178	0.347	0.046	1.47795e-39
irak3	1.37003e-43	0.709133	0.557	0.167	1.95968e-39
sema6e	1.55872e-43	0.400419	0.238	0.004	2.22959e-39
st3gal3a	2.68948e-43	0.520007	0.415	0.08	3.84703e-39
mgst1.2	6.27706e-43	-0.818246	0.025	0.408	8.9787e-39
fcer1g	6.52509e-43	0.783806	0.77	0.408	9.33349e-39
calm1b	6.54359e-43	0.455531	0.296	0.024	9.35995e-39
si:ch1073-190k2.1	7.12737e-43	0.571062	0.263	0.014	1.0195e-38
ptpn18	8.61729e-43	0.467854	0.296	0.025	1.23262e-38
pdxka	1.87737e-42	0.457604	0.256	0.011	2.68539e-38
cox6a2	2.05541e-42	0.444545	0.251	0.01	2.94006e-38
anxa11b	2.3698e-42	0.659333	0.646	0.243	3.38977e-38
dusp1	4.18016e-42	0.968748	0.787	0.39	5.9793e-38
CABZ01080568.1	4.28596e-42	0.888585	0.987	0.766	6.13063e-38
stk17b	5.84906e-42	0.528179	0.41	0.081	8.3665e-38
tnfrsf21	1.04194e-41	0.418563	0.273	0.019	1.49039e-37
cntfr	2.10523e-41	0.376263	0.223	0.003	3.01133e-37
atf3	3.88829e-41	1.27953	0.59	0.229	5.56181e-37
hbegfb	5.57172e-41	-0.934713	0.023	0.39	7.96979e-37
sash1a	8.13955e-41	0.513404	0.39	0.071	1.16428e-36
gse1	1.00747e-40	0.44342	0.311	0.035	1.44109e-36
mpeg1.1	2.56448e-40	0.736983	0.934	0.7	3.66823e-36
hipk3b	2.63385e-40	0.519005	0.311	0.038	3.76746e-36
arpc2	3.35858e-40	0.694485	0.808	0.422	4.80411e-36
glb1l	3.7213e-40	0.675613	0.663	0.264	5.32295e-36
il10ra	3.89742e-40	-0.91129	0.033	0.397	5.57487e-36
ryr3	4.40418e-40	0.374882	0.238	0.009	6.29974e-36
socs1a	5.84216e-40	0.763603	0.266	0.02	8.35662e-36
net1	8.24574e-40	0.482049	0.238	0.01	1.17947e-35
cfl1	1.12146e-39	0.715658	0.997	0.877	1.60414e-35
si:ch211-269k10.5	1.6988e-39	0.565701	0.413	0.093	2.42997e-35
hmha1a	5.47285e-39	0.508998	0.441	0.104	7.82837e-35
dusp6	8.18562e-39	0.75198	0.565	0.202	1.17087e-34
ctnnd2a	1.00228e-38	0.355457	0.205	0.001	1.43367e-34
si:ch211-196l7.4	1.50895e-38	0.736937	0.876	0.475	2.1584e-34
frmd4bb	1.73653e-38	0.366996	0.213	0.004	2.48394e-34
fgl2a	1.99172e-38	-0.862528	0.013	0.357	2.84896e-34
huwe1	3.08907e-38	0.478005	0.342	0.056	4.4186e-34
si:dkey-253i9.4	3.55965e-38	0.407047	0.286	0.03	5.09172e-34
si:dkey-85k7.12	4.79961e-38	0.359737	0.223	0.008	6.86536e-34
syngr3b	5.46682e-38	0.364175	0.21	0.004	7.81973e-34
atf4a	5.88426e-38	0.760183	0.706	0.347	8.41684e-34
zgc:152774	7.24781e-38	0.513737	0.385	0.081	1.03673e-33
pdlim1	1.05389e-37	0.340642	0.22	0.008	1.50748e-33
si:dkey-9c18.3	1.36428e-37	0.334293	0.195	0	1.95146e-33
hsp90ab1	4.57791e-37	-1.00615	0.939	0.967	6.54824e-33
atp2a3	5.68262e-37	0.411437	0.263	0.024	8.12842e-33
lasp1	9.49737e-37	0.612451	0.542	0.19	1.3585e-32
dab2ipa	1.13292e-36	0.333844	0.208	0.005	1.62053e-32
ncor2	1.56348e-36	0.449905	0.332	0.053	2.23641e-32
mpp1	1.89842e-36	-0.732769	0.071	0.427	2.7155e-32
ppp1r15a	2.87213e-36	0.88981	0.722	0.346	4.10829e-32
si:dkey-27h10.2	4.30064e-36	-0.93576	0.21	0.564	6.15163e-32
RASSF5	5.4039e-36	0.398449	0.291	0.037	7.72974e-32
actb2	5.40742e-36	0.426596	1	0.999	7.73477e-32
laptm5	6.85837e-36	-0.796776	0.871	0.93	9.81022e-32
capza1b	8.3894e-36	0.622426	0.618	0.259	1.20002e-31
lpar6b	1.32866e-35	0.354431	0.185	0	1.90052e-31
si:dkey-253d23.3	2.0422e-35	0.463659	0.319	0.053	2.92116e-31
sgk3	2.20702e-35	0.535829	0.461	0.138	3.15692e-31
ctsba	2.47186e-35	-0.973813	0.41	0.688	3.53575e-31
lgmn	6.49063e-35	-0.786768	0.043	0.378	9.2842e-31
gria4b	6.78041e-35	0.307277	0.19	0.003	9.6987e-31
mknk2b	7.06414e-35	0.731055	0.828	0.458	1.01045e-30
bik	9.32597e-35	0.35568	0.19	0.003	1.33399e-30
cblb	1.65562e-34	0.692005	0.661	0.288	2.3682e-30
gng10	1.70939e-34	-1.38553	0.238	0.54	2.44511e-30
pnrc2	2.1236e-34	0.706867	0.924	0.681	3.0376e-30
atp1b3b	2.15128e-34	0.283528	0.187	0.003	3.07719e-30
fnbp1l	2.26126e-34	0.322633	0.208	0.009	3.23451e-30
ube2e2	2.35764e-34	0.488363	0.425	0.118	3.37237e-30
fbxo34	2.77611e-34	0.38389	0.316	0.053	3.97095e-30
cx32.2	3.35155e-34	-0.830943	0.053	0.385	4.79406e-30
slc30a1a	5.16315e-34	-0.732552	0.048	0.376	7.38537e-30
map4k6	6.34764e-34	0.332028	0.197	0.006	9.07966e-30
stx3a	7.09407e-34	0.307406	0.203	0.008	1.01474e-29
erbin	1.03604e-33	0.454064	0.324	0.06	1.48195e-29
sntb1	1.21771e-33	0.28718	0.175	0	1.74181e-29
fkbp5	1.59651e-33	0.747742	0.742	0.402	2.28365e-29
lin7b	2.11148e-33	0.265457	0.182	0.003	3.02027e-29
dgkza	2.6664e-33	0.382429	0.273	0.035	3.81402e-29
zgc:152863	3.30592e-33	0.701341	0.539	0.196	4.72879e-29
cnot6a	4.40501e-33	0.373021	0.256	0.029	6.30092e-29
myt1b	4.89363e-33	0.356627	0.251	0.027	6.99984e-29
si:ch73-158p21.3	6.04362e-33	-0.951282	0.387	0.657	8.64479e-29
serinc5	7.76701e-33	0.39049	0.278	0.039	1.11099e-28
mfap4	9.53881e-33	-1.3533	0.02	0.327	1.36443e-28
pim1	1.12011e-32	0.622961	0.486	0.155	1.60221e-28
tep1	1.15314e-32	0.407992	0.284	0.043	1.64945e-28
rap1gap2a	1.58818e-32	0.300686	0.182	0.004	2.27173e-28
cebpa	1.60743e-32	-0.770986	0.053	0.371	2.29927e-28
plxna3	3.30028e-32	0.283528	0.172	0.001	4.72073e-28
si:dkey-102c8.3	4.20149e-32	0.414062	0.301	0.052	6.00981e-28
znf609a	6.10418e-32	0.407157	0.284	0.044	8.73142e-28
msi2a	7.56211e-32	0.345579	0.187	0.006	1.08168e-27
map4k5	1.64277e-31	0.289152	0.208	0.014	2.34982e-27
capns1b	4.90278e-31	0.448601	0.395	0.106	7.01293e-27
cxcr3.2	8.9872e-31	-0.561447	0.015	0.304	1.28553e-26
si:ch73-122g19.1	1.05331e-30	0.310929	0.159	0	1.50665e-26
ssbp3b	1.17944e-30	0.321521	0.235	0.027	1.68707e-26
pfkfb3	1.22142e-30	0.632471	0.506	0.184	1.74712e-26
si:dkey-118j18.2	1.37462e-30	0.369831	0.296	0.053	1.96626e-26
abca1b	1.64471e-30	-0.620737	0.02	0.312	2.3526e-26
atp10d	1.67508e-30	0.400317	0.284	0.047	2.39604e-26
rap1b	2.00661e-30	0.594117	0.729	0.389	2.87026e-26
arhgdia	2.08806e-30	0.628889	0.628	0.297	2.98677e-26
ptpn6	2.23303e-30	0.652419	0.704	0.375	3.19413e-26
susd6	4.37273e-30	0.414847	0.354	0.086	6.25476e-26
stoml3b	4.43481e-30	-0.877588	0.025	0.313	6.34355e-26
zgc:92107	4.52523e-30	0.404618	0.286	0.051	6.47289e-26
cfp	4.92971e-30	-0.723299	0.086	0.401	7.05146e-26
si:dkey-102g19.3	6.12663e-30	-0.575983	0.015	0.298	8.76354e-26
ptmaa	6.54444e-30	0.61396	0.927	0.669	9.36117e-26
arhgap29b	1.68913e-29	0.388906	0.332	0.075	2.41613e-25
klf6a	1.90914e-29	0.895217	0.924	0.762	2.73084e-25
zgc:173742	2.68674e-29	0.286518	0.157	0.001	3.84312e-25
abca2	2.91924e-29	0.308224	0.2	0.015	4.17568e-25
ctsla	3.72511e-29	-0.924072	0.018	0.295	5.32839e-25
si:dkey-22o12.2	3.78894e-29	0.315457	0.213	0.02	5.4197e-25
aplp2	1.06356e-28	-0.723612	0.119	0.422	1.52131e-24
CABZ01068358.1	1.42732e-28	-0.72594	0.104	0.407	2.04164e-24
mrtfab	1.45277e-28	0.436442	0.403	0.12	2.07804e-24
entpd1	2.29463e-28	-0.509779	0.02	0.294	3.28224e-24
lgals9l3	2.35411e-28	-0.550413	0.038	0.324	3.36732e-24
fosab	2.78892e-28	0.678585	0.982	0.928	3.98927e-24
lta4h	3.06047e-28	-0.68374	0.063	0.35	4.3777e-24
mrtfaa	3.28861e-28	0.2624	0.195	0.015	4.70402e-24
acsl4b	4.07792e-28	-0.718635	0.035	0.317	5.83306e-24
ddx5	5.02592e-28	0.54074	0.939	0.627	7.18907e-24
kdm2bb	5.2206e-28	0.330443	0.258	0.042	7.46755e-24
heatr5a	5.90242e-28	0.257582	0.167	0.006	8.44282e-24
si:ch211-203d1.3	6.97123e-28	0.399821	0.322	0.077	9.97165e-24
setx	7.41557e-28	0.295029	0.185	0.013	1.06072e-23
cst3	8.40301e-28	-0.777931	0.359	0.617	1.20197e-23
arpc4	1.30692e-27	0.543239	0.59	0.272	1.86942e-23
coro1a	1.79017e-27	0.506712	0.947	0.689	2.56065e-23
si:ch73-248e21.5	1.88324e-27	-0.644353	0.058	0.347	2.69379e-23
si:dkey-151g10.6	2.20958e-27	-0.961655	0.98	0.986	3.16059e-23
timp2a	2.642e-27	0.287352	0.182	0.013	3.77911e-23
zgc:153733	2.9998e-27	0.311288	0.233	0.033	4.29091e-23
tyrobp	3.01979e-27	0.291717	0.2	0.019	4.31951e-23
galnt1	3.23624e-27	0.310809	0.205	0.022	4.62912e-23
bcl6ab	3.83781e-27	0.326667	0.253	0.042	5.48961e-23
ddit4	4.07069e-27	0.90314	0.43	0.156	5.82271e-23
hck	4.10341e-27	0.421951	0.382	0.117	5.86952e-23
slc1a3a	5.29214e-27	-0.497523	0.01	0.266	7.56987e-23
tagapb	5.47492e-27	0.512746	0.547	0.219	7.83133e-23
btk	5.75552e-27	0.365305	0.281	0.058	8.2327e-23
myl12.1	6.35849e-27	0.509916	0.711	0.375	9.09519e-23
akt3a	9.20357e-27	0.375758	0.258	0.046	1.31648e-22
cbx7a	9.82555e-27	0.378953	0.228	0.032	1.40545e-22
rsrp1	9.92923e-27	0.550552	0.825	0.471	1.42028e-22
CABZ01117840.1	1.84018e-26	0.294099	0.162	0.008	2.63219e-22
cited4b	2.06762e-26	1.01742	0.382	0.129	2.95752e-22
rpa2	2.83953e-26	0.438389	0.278	0.06	4.06167e-22
tanc2a	3.09956e-26	0.388293	0.316	0.077	4.43361e-22
si:dkey-32n7.4	3.39355e-26	-0.557484	0.063	0.347	4.85413e-22
slc35g2a	3.71503e-26	0.334151	0.157	0.006	5.31398e-22
atp6v0ca	3.72828e-26	-0.858309	0.476	0.676	5.33294e-22
ids	3.74003e-26	0.298815	0.243	0.039	5.34974e-22
tpcn1	4.16023e-26	0.25343	0.19	0.018	5.95079e-22
arhgap17b	4.59655e-26	0.350193	0.289	0.063	6.57491e-22
cd209	4.61089e-26	0.310809	0.192	0.019	6.59542e-22
ltb4r	4.94423e-26	-0.502009	0.018	0.271	7.07223e-22
mbnl3	5.71554e-26	0.3901	0.327	0.085	8.17551e-22
kif21b	5.95962e-26	0.375307	0.329	0.084	8.52465e-22
rbm47	6.6072e-26	0.410812	0.375	0.115	9.45094e-22
si:dkey-56m19.5	7.54519e-26	0.591986	0.643	0.332	1.07926e-21
si:ch211-74m13.3	7.94535e-26	-0.819057	0.046	0.309	1.1365e-21
grn2	8.07962e-26	0.529995	0.256	0.049	1.15571e-21
ehbp1l1a	1.22144e-25	0.253282	0.142	0.003	1.74715e-21
rnaseka	1.32545e-25	-0.735052	0.2	0.483	1.89593e-21
sall3b	1.74754e-25	0.359348	0.185	0.018	2.49968e-21
BX323022.1	2.2429e-25	0.287679	0.195	0.022	3.20824e-21
tmem176l.4	3.43527e-25	-0.566101	0.008	0.246	4.91381e-21
gabarapb	5.95063e-25	0.589746	0.661	0.369	8.51177e-21
tubb2b	6.65913e-25	0.420219	0.354	0.105	9.52522e-21
celf2	8.20636e-25	0.416336	0.375	0.115	1.17384e-20
CABZ01080702.1	9.30934e-25	0.300593	0.22	0.034	1.33161e-20
slc12a2	1.03491e-24	0.48896	0.552	0.252	1.48034e-20
cd22	1.36558e-24	-0.516219	0.008	0.241	1.95333e-20
hif1al	1.86676e-24	0.417933	0.352	0.105	2.67021e-20
pik3cg	1.97761e-24	0.276655	0.246	0.046	2.82878e-20
fzd2	1.98874e-24	-0.594074	0.114	0.393	2.84469e-20
tnfsf12	2.24434e-24	-0.410586	0.015	0.255	3.2103e-20
mertka	2.75152e-24	-0.47618	0.03	0.28	3.93578e-20
mafgb	2.79264e-24	0.272348	0.203	0.027	3.99459e-20
ccr2	3.46686e-24	-0.520192	0.008	0.238	4.959e-20
top1l	3.854e-24	0.621889	0.643	0.342	5.51277e-20
cebpb	6.1297e-24	-0.844329	0.595	0.792	8.76792e-20
cd74b	7.22938e-24	-0.62941	1	0.999	1.03409e-19
si:dkey-148a17.5	1.16043e-23	0.437008	0.415	0.152	1.65988e-19
arhgap1	1.3419e-23	0.257627	0.185	0.022	1.91946e-19
sall3a	1.43324e-23	0.467169	0.43	0.167	2.0501e-19
csf1ra	1.47592e-23	-0.419574	0.008	0.233	2.11116e-19
micall1b.2	2.4052e-23	0.253332	0.149	0.009	3.4404e-19
lyn	2.7377e-23	0.431716	0.461	0.184	3.916e-19
si:dkey-253d23.4	6.00609e-23	0.260032	0.197	0.028	8.59112e-19
CABZ01054965.1	8.29634e-23	-0.465774	0.023	0.253	1.18671e-18
sla2	8.6128e-23	0.430365	0.213	0.035	1.23197e-18
pik3r5	1.51344e-22	0.316995	0.248	0.054	2.16482e-18
si:dkey-262k9.2	1.69818e-22	0.278801	0.175	0.019	2.42907e-18
klf12a	1.81666e-22	0.354912	0.347	0.109	2.59855e-18
si:dkey-187e18.1	2.07256e-22	0.381291	0.344	0.108	2.96458e-18
tescb	2.67e-22	0.291532	0.197	0.03	3.81917e-18
pgd	3.28132e-22	-0.434395	0.03	0.261	4.69359e-18
skap2	3.86905e-22	0.357715	0.347	0.113	5.53429e-18
ckba	4.16564e-22	0.299316	0.139	0.008	5.95853e-18
clk4a	4.71395e-22	0.449594	0.441	0.177	6.74283e-18
si:dkey-18p12.4	4.85992e-22	0.45916	0.342	0.117	6.95163e-18
gpx1a	6.25065e-22	0.547902	0.625	0.343	8.94093e-18
ttc3	6.75928e-22	0.29476	0.248	0.054	9.66847e-18
si:ch211-198c19.1	6.77812e-22	0.383807	0.342	0.109	9.69542e-18
mycbp2	7.0065e-22	0.386185	0.365	0.123	1.00221e-17
gpr183a	9.33242e-22	-0.482633	0.015	0.231	1.33491e-17
agtrap	9.5617e-22	-0.393109	0.005	0.213	1.36771e-17
syk	9.78224e-22	0.449969	0.519	0.241	1.39925e-17
utrn	1.05518e-21	0.276412	0.195	0.03	1.50933e-17
lmbrd1	1.10332e-21	0.363038	0.334	0.105	1.57819e-17
skilb	1.12819e-21	0.411727	0.395	0.144	1.61376e-17
grna	1.24798e-21	-0.630966	0.554	0.715	1.78511e-17
mmp14b	1.52627e-21	-0.484939	0.015	0.228	2.18317e-17
asah1b	1.88018e-21	-0.965646	0.618	0.719	2.68941e-17
fuca2	1.88682e-21	-0.662925	0.256	0.503	2.69891e-17
fosb	2.59302e-21	-1.03988	0.253	0.493	3.70906e-17
il6r	3.39758e-21	-0.396381	0.01	0.217	4.85991e-17
zgc:194312	3.70305e-21	0.380921	0.415	0.16	5.29684e-17
tent4b	3.85565e-21	0.28691	0.251	0.058	5.51513e-17
zgc:153867	4.06076e-21	0.508991	0.565	0.285	5.80851e-17
smarca4a	4.67956e-21	0.296886	0.251	0.06	6.69365e-17
gnai2b	4.83019e-21	0.398926	0.438	0.176	6.90911e-17
usp9	8.71488e-21	0.317109	0.276	0.074	1.24658e-16
rgcc	1.23935e-20	0.268684	0.172	0.023	1.77276e-16
sesn1	1.33274e-20	-0.58679	0.076	0.318	1.90635e-16
lgals2a	1.33742e-20	-0.898278	0.205	0.447	1.91304e-16
srgap2	1.444e-20	0.470483	0.6	0.326	2.06549e-16
slc25a39	1.8497e-20	0.255294	0.182	0.028	2.64581e-16
marcksl1a	1.86085e-20	0.412564	0.972	0.762	2.66176e-16
naga	1.88697e-20	-0.733179	0.365	0.573	2.69912e-16
osbpl9	2.20567e-20	0.361596	0.382	0.146	3.15499e-16
arl6ip1	2.33013e-20	0.485103	0.752	0.485	3.33302e-16
cxcr4b	2.43421e-20	-1.10376	0.552	0.698	3.48189e-16
slc25a5	2.5732e-20	-0.791993	0.924	0.925	3.6807e-16
hamp	2.7594e-20	-1.56848	0.046	0.264	3.94705e-16
cotl1	3.11872e-20	0.500182	0.911	0.711	4.46102e-16
adgre10	3.44008e-20	0.632196	0.752	0.459	4.92068e-16
gng5	3.47557e-20	0.339771	0.367	0.131	4.97146e-16
her9	5.83846e-20	0.544725	0.154	0.018	8.35133e-16
csk	1.30196e-19	0.309935	0.289	0.085	1.86233e-15
bcam	1.61797e-19	0.395723	0.408	0.163	2.31434e-15
acin1a	1.67848e-19	0.384575	0.458	0.195	2.4009e-15
sf3b1	1.77402e-19	0.303564	0.306	0.096	2.53756e-15
CABZ01041494.1	2.49193e-19	-0.354996	0.015	0.21	3.56445e-15
sdcbp2	2.5101e-19	-0.577668	0.165	0.399	3.59044e-15
si:cabz01074946.1	2.74327e-19	-0.707492	0.058	0.275	3.92398e-15
rac1a	2.88518e-19	-0.447453	0.048	0.265	4.12696e-15
jun	3.84904e-19	0.509165	0.929	0.771	5.50567e-15
RPS17	4.00661e-19	-0.907653	0.8	0.84	5.73105e-15
nfkbie	4.35417e-19	0.336227	0.365	0.134	6.2282e-15
entpd2a.1	5.45906e-19	-0.375349	0.015	0.207	7.80864e-15
elf1	5.77639e-19	0.298555	0.286	0.087	8.26255e-15
cox6b1	6.15768e-19	0.304898	0.359	0.129	8.80795e-15
csf2rb	7.31876e-19	-0.480052	0.048	0.257	1.04688e-14
bhlhe40	8.39658e-19	0.602658	0.6	0.346	1.20105e-14
rarres3l	8.84442e-19	0.410417	0.385	0.15	1.26511e-14
si:ch211-132p1.3	9.11451e-19	-0.764328	0.18	0.411	1.30374e-14
mych	1.15139e-18	0.484278	0.286	0.091	1.64695e-14
srsf11	1.57918e-18	0.312893	0.329	0.117	2.25886e-14
map3k14a	1.72161e-18	0.307325	0.258	0.074	2.4626e-14
fam49al	1.76492e-18	0.338964	0.342	0.125	2.52454e-14
srsf5a	1.84535e-18	0.37577	0.484	0.224	2.63959e-14
tmem63ba	1.84886e-18	-0.381416	0.025	0.223	2.64461e-14
stk35	1.94262e-18	0.381797	0.392	0.162	2.77872e-14
ubc	1.94316e-18	0.549815	0.942	0.722	2.7795e-14
slc2a6	2.16013e-18	-0.419146	0	0.172	3.08986e-14
camk1b	2.55954e-18	0.270838	0.233	0.06	3.66117e-14
cnbpb	2.73793e-18	0.354041	0.39	0.155	3.91633e-14
agpat3	3.26588e-18	0.287832	0.251	0.07	4.67151e-14
wipf1b	3.51699e-18	-0.328056	0.013	0.196	5.0307e-14
dbnlb	3.80657e-18	0.389655	0.397	0.169	5.44491e-14
pde4ba	5.55521e-18	0.304326	0.223	0.056	7.94618e-14
arpc3	5.94308e-18	0.434873	0.618	0.347	8.50098e-14
eef1b2	6.34192e-18	-0.754875	0.666	0.769	9.07149e-14
arf6b	6.91998e-18	0.309374	0.256	0.075	9.89833e-14
osbpl2b	7.13528e-18	0.282802	0.251	0.071	1.02063e-13
mafbb	1.02502e-17	-0.507334	0.048	0.251	1.46619e-13
mras	1.02849e-17	0.304181	0.304	0.105	1.47115e-13
spi1b	1.04111e-17	0.435732	0.706	0.46	1.4892e-13
ptx4	1.21647e-17	-0.335997	0.008	0.181	1.74003e-13
2008-03-01	1.38528e-17	0.380443	0.478	0.228	1.9815e-13
selenop	1.45553e-17	-0.388746	0.025	0.213	2.08199e-13
pdgfba	2.10821e-17	-0.305158	0.018	0.199	3.01559e-13
hdac1	2.1354e-17	0.333593	0.294	0.1	3.05447e-13
adrb2a	2.74571e-17	0.41391	0.423	0.198	3.92746e-13
tlr8a	2.79309e-17	0.265813	0.197	0.044	3.99524e-13
prcp	3.08268e-17	-0.324464	0.025	0.21	4.40946e-13
ptmab	3.88885e-17	0.335821	0.965	0.783	5.56261e-13
atp6ap2	6.04414e-17	-0.639023	0.428	0.596	8.64554e-13
si:ch211-222k6.3	6.37647e-17	-0.303517	0.013	0.185	9.1209e-13
irf2bp2b	6.73095e-17	0.363342	0.387	0.166	9.62796e-13
pabpc1a	6.91697e-17	-0.602158	0.557	0.692	9.89404e-13
nr1h3	8.62335e-17	0.260629	0.182	0.038	1.23348e-12
ankrd12	1.12492e-16	0.290461	0.266	0.082	1.60909e-12
nfil3-6	1.13807e-16	-0.515707	0.041	0.227	1.6279e-12
cndp2	1.22844e-16	-0.430767	0.066	0.265	1.75716e-12
epn1	1.28051e-16	0.268552	0.218	0.057	1.83163e-12
dpp7	1.33485e-16	-0.42067	0.066	0.266	1.90937e-12
timp4.3	1.34952e-16	-0.509187	0.01	0.176	1.93036e-12
si:dkey-222f2.7	1.35895e-16	-0.311347	0.005	0.166	1.94385e-12
grap2b	1.45494e-16	0.30861	0.362	0.148	2.08115e-12
grasp	1.57853e-16	0.386243	0.37	0.156	2.25792e-12
eef2b	2.10799e-16	-0.641322	0.678	0.768	3.01527e-12
rasgef1ba	2.31473e-16	-0.550031	0.058	0.25	3.31099e-12
hnrpkl	2.41702e-16	0.253885	0.243	0.074	3.45731e-12
csnk1g2b	2.57576e-16	0.289101	0.316	0.117	3.68437e-12
notch2	4.3535e-16	0.306061	0.332	0.128	6.22725e-12
bpifcl	4.92042e-16	0.307741	0.203	0.052	7.03817e-12
rack1	5.00611e-16	-0.735264	0.828	0.876	7.16075e-12
srrm1	5.62646e-16	0.283765	0.38	0.158	8.04809e-12
dido1	5.65229e-16	0.329495	0.322	0.123	8.08504e-12
xiap	5.78979e-16	0.305809	0.301	0.112	8.28171e-12
grb2b	5.87181e-16	0.377326	0.435	0.213	8.39904e-12
tnfaip8l2a	5.9791e-16	0.262866	0.256	0.082	8.55251e-12
tmc8	7.50466e-16	0.266756	0.228	0.065	1.07347e-11
lipg	7.70236e-16	-0.654392	0.005	0.16	1.10175e-11
sb:cb81	8.20832e-16	-0.358082	0.025	0.196	1.17412e-11
BX120005.1	8.7843e-16	-0.794847	0.033	0.208	1.25651e-11
emc7	9.50916e-16	0.285248	0.375	0.158	1.36019e-11
blnk	1.13205e-15	0.265134	0.225	0.066	1.61928e-11
stab1	1.21051e-15	-0.277858	0.003	0.152	1.73151e-11
faua	1.29008e-15	-0.789907	0.911	0.904	1.84533e-11
plcb3	1.29812e-15	0.338217	0.314	0.123	1.85683e-11
pecam1	1.44474e-15	-0.357971	0.066	0.257	2.06655e-11
arpc4l	1.56196e-15	0.310812	0.509	0.253	2.23423e-11
prss16	1.70598e-15	-0.440846	0.096	0.294	2.44024e-11
il4r.2	1.87332e-15	-0.329486	0.013	0.171	2.6796e-11
pnisr	1.89595e-15	0.270671	0.228	0.068	2.71197e-11
ostf1	1.95499e-15	0.271707	0.248	0.081	2.79641e-11
tmem131l	2.25609e-15	0.357422	0.365	0.155	3.22711e-11
abcc5	2.25711e-15	-0.498614	0.195	0.409	3.22858e-11
abi1b	2.34634e-15	-0.315936	0.025	0.193	3.3562e-11
erh	2.4393e-15	0.338797	0.478	0.242	3.48917e-11
akap8l	2.84487e-15	0.273807	0.258	0.087	4.0693e-11
p2ry12	2.88723e-15	-0.270936	0	0.143	4.12989e-11
zgc:153184	2.97843e-15	-0.277385	0.028	0.199	4.26035e-11
etv4	3.00105e-15	-0.275457	0.02	0.185	4.2927e-11
ppiaa	3.41787e-15	-0.625406	0.734	0.802	4.88892e-11
ciarta	4.10758e-15	0.409533	0.349	0.15	5.87548e-11
rhogb	4.75249e-15	0.308333	0.43	0.205	6.79797e-11
wasf2	4.85126e-15	0.313925	0.418	0.198	6.93924e-11
kmt2bb	4.8567e-15	0.297076	0.456	0.217	6.94703e-11
si:dkey-172h23.2	6.1639e-15	0.299254	0.329	0.132	8.81684e-11
il1b	7.12182e-15	-0.677648	0.078	0.264	1.0187e-10
eef1g	7.14502e-15	-0.654081	0.772	0.839	1.02202e-10
il21	7.71366e-15	0.295072	0.129	0.019	1.10336e-10
jdp2b	7.76792e-15	0.694575	0.916	0.81	1.11112e-10
fthl27	7.9282e-15	-0.753272	0.289	0.47	1.13405e-10
tpt1	8.06395e-15	-0.649617	0.77	0.829	1.15347e-10
plekhj1	8.64918e-15	0.265731	0.218	0.066	1.23718e-10
eef1da	8.86064e-15	-0.566139	0.215	0.411	1.26743e-10
si:ch211-286b5.9	9.2103e-15	-0.27059	0.005	0.15	1.31744e-10
ywhabl	1.0017e-14	0.315011	0.461	0.233	1.43283e-10
gadd45bb	1.00372e-14	0.67596	0.453	0.234	1.43572e-10
igf2b	1.28251e-14	-0.324475	0.008	0.153	1.83451e-10
tuba8l4	1.84617e-14	0.339544	0.453	0.223	2.64076e-10
naca	2.15303e-14	-0.649421	0.846	0.856	3.07969e-10
slc45a4	2.20995e-14	-0.278386	0.03	0.191	3.16111e-10
ctsa	3.08751e-14	-0.409867	0.152	0.349	4.41637e-10
hexb	3.38936e-14	-0.447239	0.152	0.347	4.84814e-10
msna	3.55588e-14	0.340323	0.653	0.387	5.08633e-10
bin1b	4.00987e-14	0.252094	0.21	0.065	5.73572e-10
hspa5	4.56104e-14	-1.18916	0.744	0.763	6.52411e-10
abhd12	4.58256e-14	-0.416865	0.109	0.299	6.55489e-10
zgc:158564	5.09766e-14	0.318277	0.316	0.131	7.29169e-10
si:ch73-237c6.1	5.15392e-14	-0.367926	0.078	0.259	7.37216e-10
wasa	5.4568e-14	0.299477	0.299	0.118	7.80541e-10
2002-09-01	5.54072e-14	0.329794	0.441	0.224	7.92544e-10
insig1	6.08194e-14	0.449125	0.501	0.279	8.69961e-10
npc2	7.14808e-14	-0.63285	0.924	0.921	1.02246e-09
syncrip	7.17879e-14	0.282401	0.329	0.138	1.02685e-09
uba52	7.36891e-14	-0.800906	0.939	0.933	1.05405e-09
adipor2	7.96512e-14	-0.605337	0.238	0.428	1.13933e-09
pmaip1	8.38378e-14	-0.692723	0.258	0.459	1.19922e-09
gnb1b	1.4673e-13	0.337469	0.547	0.3	2.09882e-09
gnb1a	1.57344e-13	0.276526	0.349	0.156	2.25065e-09
grb10b	1.69335e-13	-0.305922	0.02	0.167	2.42216e-09
ssr2	1.73717e-13	-0.444001	0.152	0.34	2.48485e-09
ywhag2	1.90022e-13	0.274728	0.246	0.089	2.71808e-09
grinab	2.35789e-13	-0.261926	0.028	0.18	3.37273e-09
csf3a	2.52694e-13	-0.380614	0.015	0.155	3.61454e-09
nfkbiab	2.92563e-13	0.352066	0.841	0.548	4.18482e-09
ehd4	2.97271e-13	-0.253366	0.01	0.144	4.25216e-09
si:dkey-5n18.1	3.26491e-13	-0.415051	0.005	0.134	4.67012e-09
atf4b	3.51153e-13	0.307403	0.565	0.319	5.02289e-09
hivep1	3.51398e-13	0.263921	0.238	0.084	5.0264e-09
tmem131	3.73449e-13	-0.471144	0.154	0.34	5.34181e-09
klf7b	4.05975e-13	0.252696	0.197	0.061	5.80707e-09
adgrg3	4.48831e-13	-0.312721	0.048	0.209	6.42008e-09
ece2b	4.95333e-13	0.284685	0.154	0.037	7.08524e-09
actr2a	5.1246e-13	0.251359	0.357	0.16	7.33023e-09
mafba	5.64289e-13	-0.269912	0.018	0.157	8.07159e-09
trnau1apb	6.35352e-13	0.25343	0.309	0.132	9.08808e-09
ankrd11	6.39853e-13	0.285126	0.322	0.137	9.15246e-09
histh1l	9.25492e-13	0.726307	0.372	0.196	1.32382e-08
fxyd1	1.03233e-12	-0.261576	0.013	0.146	1.47664e-08
zswim5	1.21567e-12	0.307071	0.38	0.19	1.7389e-08
litaf	1.62982e-12	0.259969	0.481	0.255	2.33129e-08
myo1f	3.42509e-12	0.262785	0.266	0.108	4.89924e-08
tlr1	3.96521e-12	0.298988	0.359	0.174	5.67183e-08
samsn1a	4.04736e-12	-0.269467	0.035	0.181	5.78935e-08
rassf2a	4.78196e-12	-0.264862	0.056	0.213	6.84011e-08
hmgb1a	5.9735e-12	0.268605	0.514	0.289	8.5445e-08
glud1a	6.73079e-12	-0.343589	0.056	0.205	9.62772e-08
elovl1b	7.02136e-12	-0.389109	0.175	0.356	1.00434e-07
gnpda1	8.61259e-12	-0.28052	0.056	0.207	1.23195e-07
swap70b	8.66099e-12	-0.288493	0.078	0.243	1.23887e-07
kif1b	8.76886e-12	0.256658	0.311	0.142	1.2543e-07
plin2	1.18066e-11	-0.409003	0.035	0.172	1.68881e-07
h2afx1	1.20427e-11	0.371891	0.767	0.535	1.72259e-07
nucb1	1.49364e-11	-0.494367	0.382	0.518	2.13651e-07
ctsc	1.54069e-11	-0.395977	0.177	0.35	2.20381e-07
RPL37A	1.57079e-11	-0.696959	0.919	0.9	2.24686e-07
si:dkey-205h13.1	1.8293e-11	-0.323755	0.008	0.123	2.61663e-07
tram1	2.13291e-11	0.335667	0.565	0.356	3.05092e-07
tmem106c	2.27176e-11	0.254948	0.284	0.127	3.24952e-07
mid1ip1l	2.54059e-11	0.25639	0.359	0.177	3.63405e-07
eef1a1l1	2.55176e-11	-0.838506	0.98	0.959	3.65003e-07
sat1a.2	4.25845e-11	0.518063	0.916	0.838	6.09128e-07
inhbb	4.85542e-11	-0.251847	0.01	0.123	6.94519e-07
crip1	5.11607e-11	-0.329911	0.046	0.184	7.31802e-07
si:dkey-33i11.1	7.5483e-11	-0.409755	0.258	0.423	1.07971e-06
slc20a1b	7.64173e-11	-0.648437	0.375	0.501	1.09307e-06
gdi2	8.28256e-11	0.278032	0.382	0.203	1.18474e-06
fosl1a	8.30888e-11	-0.367521	0.122	0.288	1.1885e-06
CABZ01001434.1	8.39351e-11	-0.779851	0.071	0.212	1.20061e-06
ppib	1.06571e-10	-0.459894	0.42	0.555	1.5244e-06
mdh1aa	1.08442e-10	-0.423095	0.195	0.355	1.55116e-06
tnfb	1.14982e-10	-0.974389	0.127	0.278	1.64471e-06
thrap3b	1.4072e-10	0.267814	0.284	0.131	2.01286e-06
ncf2	2.97096e-10	-0.250665	0.048	0.18	4.24966e-06
itgae.1	3.1866e-10	-0.2882	0.051	0.183	4.55811e-06
pdk2b	3.33562e-10	-0.444847	0.078	0.219	4.77127e-06
ssr3	6.43017e-10	-0.401253	0.21	0.368	9.19772e-06
oser1	8.11205e-10	0.26167	0.357	0.185	1.16035e-05
serpine1	9.39279e-10	-0.47331	0.01	0.11	1.34355e-05
fosl2	1.82813e-09	-0.365733	0.048	0.169	2.61495e-05
si:dkey-58f10.11	1.89564e-09	-0.302001	0.086	0.226	2.71152e-05
NPC2 (1 of many)	1.90052e-09	-0.283627	0.015	0.117	2.7185e-05
ybx1	2.45551e-09	-0.55683	0.82	0.778	3.51237e-05
golgb1	2.67878e-09	0.251274	0.241	0.108	3.83173e-05
si:dkey-177p2.6	3.07728e-09	0.275707	0.527	0.321	4.40175e-05
ch25h	3.41478e-09	-0.727013	0.663	0.753	4.8845e-05
pycard	4.41189e-09	-0.407527	0.157	0.293	6.31077e-05
ssr4	5.19303e-09	-0.399463	0.187	0.33	7.42811e-05
rnaset2	6.68265e-09	-0.325753	0.084	0.212	9.55886e-05
rnf213a	7.77792e-09	-0.42819	0.377	0.518	0.000111255
si:dkey-27i16.2	9.26771e-09	0.269268	0.992	0.94	0.000132565
cd99l2	1.07736e-08	-0.362334	0.299	0.45	0.000154106
cd83	1.26042e-08	-0.463275	0.114	0.241	0.00018029
itgav	1.49658e-08	-0.329164	0.068	0.188	0.000214071
mibp2	1.69178e-08	-0.440112	0.423	0.516	0.000241992
glula	1.78664e-08	-0.655724	0.684	0.692	0.000255561
irf1b	2.11937e-08	0.265077	0.347	0.19	0.000303154
ttyh3a	2.14638e-08	0.263481	0.532	0.352	0.000307018
sgk1	2.74499e-08	-0.259448	0.061	0.181	0.000392643
rgs5b	3.13095e-08	-0.401544	0.046	0.155	0.000447851
g0s2	3.34444e-08	-0.885191	0.071	0.185	0.000478388
ets2	4.01385e-08	-0.278615	0.076	0.194	0.000574141
tln1	4.13301e-08	0.284866	0.668	0.471	0.000591185
srgap3	4.15025e-08	-0.316884	0.122	0.253	0.000593652
rab44	4.16244e-08	-0.419236	0.106	0.232	0.000595396
ncf1	5.50828e-08	0.347784	0.458	0.311	0.000787905
b2m	6.98317e-08	-0.503515	0.987	0.989	0.000998872
zgc:123107	7.64787e-08	-0.414171	0.367	0.474	0.00109395
sqstm1	9.02611e-08	0.315669	0.415	0.25	0.00129109
si:busm1-266f07.2	9.22395e-08	-0.505362	1	1	0.00131939
rsl24d1	1.11945e-07	-0.354433	0.608	0.681	0.00160126
slc3a2b	1.23201e-07	-0.42406	0.192	0.318	0.00176227
si:ch211-195b13.1	1.68663e-07	-0.250304	0.028	0.119	0.00241256
AL831726.2	2.05039e-07	-0.359164	0.162	0.292	0.00293288
pho	2.5061e-07	0.268337	0.197	0.091	0.00358473
mfng	3.2762e-07	0.250872	0.643	0.478	0.00468628
degs1	4.73213e-07	-0.328617	0.162	0.281	0.00676884
btg2	6.64213e-07	0.294447	0.884	0.75	0.0095009
cd9a	7.17659e-07	-0.327358	0.185	0.302	0.0102654
fabp11a	7.57371e-07	-0.443723	0.071	0.175	0.0108334
zgc:63831	9.50863e-07	-0.403813	0.441	0.527	0.0136011
itgb2	9.93073e-07	-0.332002	0.347	0.466	0.0142049
zgc:158343	1.10427e-06	-0.754041	0.322	0.436	0.0157954
BX323596.2	1.21379e-06	-0.739742	0.084	0.184	0.0173621
itm2ba	1.22308e-06	-0.332702	0.729	0.75	0.0174949
zgc:77650	1.36302e-06	0.251929	0.433	0.28	0.0194966
atp6ap1b	1.42851e-06	-0.28963	0.144	0.257	0.0204334
ms4a17a.6	1.49174e-06	-0.461465	0.397	0.484	0.0213379
atp6v1g1	1.52715e-06	-0.37832	0.294	0.39	0.0218444
CABZ01073795.1	1.97234e-06	-0.464831	0.096	0.195	0.0282124
slc25a25a	2.3912e-06	0.280138	0.248	0.139	0.0342038
dbi	3.47121e-06	-0.320778	0.172	0.281	0.0496522
slc7a7	3.59714e-06	-0.301993	0.23	0.345	0.0514535
si:dkey-7j14.6	4.11015e-06	-0.350319	0.392	0.479	0.0587917
tnfrsf11b	5.23201e-06	0.274725	0.177	0.086	0.0748387
eef1db	9.8717e-06	-0.289582	0.175	0.278	0.141205
bzw1b	1.0562e-05	-0.372922	0.203	0.303	0.151079
b2ml	1.09669e-05	-0.309223	0.929	0.943	0.156871
sec61g	2.11784e-05	-0.492225	0.529	0.535	0.302936
eif4ebp1	2.53526e-05	-0.255965	0.18	0.276	0.362644
midn	2.99393e-05	-0.476366	0.258	0.342	0.428251
gadd45ba	3.18283e-05	0.608937	0.537	0.408	0.455272
btf3	4.55798e-05	-0.336089	0.628	0.646	0.651974
ccr9a	5.85124e-05	-0.789435	0.324	0.387	0.836961
nrros	6.44812e-05	-0.260034	0.104	0.189	0.922339
anxa3b	7.09877e-05	-0.936891	0.63	0.663	1
hsp90b1	8.01523e-05	-0.401501	0.22	0.305	1
idh2	9.41098e-05	-0.319797	0.22	0.305	1
dusp2	9.76273e-05	-0.433226	0.263	0.335	1
psap	0.000141455	-0.306811	0.942	0.904	1
mhc2b	0.000143504	-0.399473	0.942	0.892	1
chmp4ba	0.000235641	-0.254651	0.111	0.188	1
rhbdd1	0.000243548	-0.327863	0.167	0.247	1
caspb	0.000326215	-0.357308	0.311	0.379	1
krt8	0.000501474	-0.299229	0.068	0.133	1
slc25a3b	0.000786534	-0.283813	0.278	0.34	1
bri3	0.00191194	-0.252976	0.218	0.284	1
srgn	0.00219621	-0.44768	0.524	0.504	1
ccng2	0.00259881	0.265228	0.529	0.42	1
atp5mc3b	0.00396195	-0.366002	0.37	0.397	1
CU459094.3	0.00557519	-0.576922	0.142	0.198	1
rnaset2l	0.00571601	-0.264524	0.489	0.497	1
romo1	0.00794009	-0.251166	0.258	0.303	1
mxc	0.00821611	-0.377152	0.147	0.204	1
egr1	0.013694	-0.463238	0.448	0.452	1
eif3f	0.024636	-0.331177	0.549	0.52	1
tppp	0.0603064	-0.267229	0.324	0.24	1
ddit3	0.0794599	-0.273775	0.524	0.517	1
clic2	0.142906	-0.267924	0.456	0.449	1
ppiab	0.158198	-0.361994	0.711	0.587	1
ccl35.1	0.371834	-0.992933	0.706	0.597	1
si:ch211-274k16.2	0.645712	-0.312682	0.195	0.185	1
nme2b.1	0.886621	-0.274287	0.939	0.858	1
ccl35.2	0.94825	-0.271205	0.309	0.28	1
