# Supplementary material for: A single-cell transcriptomic atlas reveals resident dendritic-like cells in the zebrafish brain parenchyma
Source: eLife. 2025 Dec 11;13:RP91427. doi: 10.7554/eLife.91427 (PMC12698085; doi:10.7554/eLife.91427)
Supplement: Supplementary file 4. [file elife-91427-supp4.xlsx]

## Sheet: MarkersMG_sign_up
	p_val	avg_log2FC	pct.1	pct.2	p_val_adj
apoc1	0	4.38919	0.999	0.811	0
lgals3bpb	0	3.70963	0.997	0.564	0
ccl34b.1	0	3.46414	1	0.631	0
apoeb	3.954e-306	2.95517	0.938	0.438	5.6558e-302
ms4a17a.10	0	2.70016	0.923	0.259	0
havcr1	0	2.2897	0.849	0.135	0
slc22a21	0	2.1518	0.902	0.164	0
ch25h	3.11289e-175	2.01932	0.753	0.265	4.45268e-171
lgals9l1	3.34707e-187	1.99765	0.763	0.298	4.78766e-183
ifi30	4.39168e-202	1.95004	0.886	0.44	6.28186e-198
cd74a	3.05683e-259	1.8476	1	0.945	4.37249e-255
fcer1gl	1.80491e-267	1.8316	0.925	0.319	2.58174e-263
havcr2	0	1.79828	0.768	0.09	0
ctsh	6.06087e-220	1.72185	0.773	0.241	8.66947e-216
slco2b1	2.34088e-297	1.69404	0.7	0.083	3.3484e-293
c1qc	4.7861e-282	1.64477	0.8	0.134	6.84604e-278
si:busm1-266f07.2	4.84543e-180	1.61029	1	0.826	6.9309e-176
sdc4	1.04027e-107	1.59831	0.743	0.448	1.488e-103
cd74b	1.58395e-199	1.55015	0.999	0.855	2.26569e-195
tspan36	2.97379e-219	1.54802	0.721	0.156	4.25371e-215
asah1b	3.18169e-157	1.51464	0.719	0.275	4.55109e-153
alox5ap	3.09645e-245	1.49039	0.646	0.094	4.42916e-241
si:ch211-212k18.7	2.71034e-167	1.47635	0.795	0.369	3.87688e-163
hamp	6.91224e-65	1.46242	0.264	0.054	9.88727e-61
si:dkey-192g7.3	3.7882e-136	1.43166	0.541	0.139	5.41864e-132
mrc1b	1.82984e-238	1.4218	0.677	0.104	2.6174e-234
si:dkey-26c10.5	1.29638e-222	1.34416	0.602	0.09	1.85434e-218
glula	1.9585e-99	1.33196	0.692	0.364	2.80144e-95
scpep1	5.27749e-187	1.32262	0.743	0.245	7.54892e-183
zgc:103700	1.75251e-170	1.31142	0.996	0.733	2.50679e-166
gng10	9.48359e-81	1.27593	0.54	0.25	1.35653e-76
ctsz	7.7593e-156	1.27369	0.575	0.141	1.10989e-151
npc2	1.43075e-134	1.26789	0.921	0.614	2.04655e-130
si:ch73-158p21.3	3.44989e-157	1.22431	0.657	0.203	4.93472e-153
marco	1.79425e-201	1.2164	0.605	0.091	2.56649e-197
mhc2b	6.49889e-130	1.21175	0.892	0.521	9.29601e-126
BX004816.2	4.04553e-123	1.21035	0.643	0.219	5.78673e-119
psap	2.20249e-143	1.18467	0.904	0.493	3.15044e-139
ctss2.2	1.13651e-138	1.1812	0.8	0.378	1.62566e-134
CR759843.2	1.01708e-165	1.1604	0.47	0.06	1.45483e-161
si:zfos-741a10.3	6.05599e-238	1.15682	0.569	0.055	8.66248e-234
tgm2l	5.51679e-138	1.15231	0.499	0.109	7.89122e-134
anxa3b	1.74406e-44	1.15025	0.663	0.445	2.49471e-40
mcamb	1.37419e-213	1.14995	0.546	0.062	1.96564e-209
cmklr1	7.74963e-220	1.14151	0.617	0.093	1.10851e-215
mfap4	1.94135e-83	1.14095	0.327	0.063	2.77691e-79
csf1rb	2.99932e-211	1.12883	0.574	0.079	4.29023e-207
vmp1	3.32394e-142	1.12877	0.611	0.171	4.75456e-138
cd63	5.1767e-85	1.11416	0.899	0.822	7.40475e-81
si:ch211-102c2.4	1.59686e-143	1.10987	0.82	0.436	2.28415e-139
si:dkey-27h10.2	1.97198e-163	1.09884	0.564	0.119	2.82072e-159
si:ch73-86n18.1	2.29743e-194	1.0946	0.523	0.066	3.28624e-190
ctsba	9.87093e-122	1.07144	0.688	0.291	1.41194e-117
scn4bb	1.25983e-163	1.05724	0.449	0.056	1.80206e-159
hspa5	8.44988e-27	1.05579	0.763	0.738	1.20867e-22
zgc:158343	2.35935e-44	1.03449	0.436	0.21	3.37481e-40
si:ch1073-392o20.2	1.92402e-126	1.02086	0.584	0.192	2.75211e-122
ctsd	6.76136e-124	1.0141	0.56	0.161	9.67145e-120
grna	1.17482e-133	1.01097	0.715	0.284	1.68046e-129
naga	1.23714e-99	0.963441	0.573	0.226	1.7696e-95
slc3a2a	1.17046e-166	0.960617	0.56	0.105	1.67422e-162
atp1b1a	1.86371e-52	0.917137	0.611	0.4	2.66585e-48
dhrs9	4.3337e-182	0.916442	0.483	0.055	6.19893e-178
gm2a	1.94238e-98	0.897849	0.762	0.381	2.77838e-94
fosb	3.04011e-40	0.895245	0.493	0.29	4.34857e-36
c1qa	1.24727e-143	0.89349	0.506	0.09	1.7841e-139
atp6v0ca	1.05575e-76	0.880432	0.676	0.379	1.51014e-72
atp6ap2	9.14271e-85	0.878528	0.596	0.282	1.30777e-80
c1qb	7.22813e-151	0.871995	0.529	0.092	1.03391e-146
ms4a17a.9	1.2232e-133	0.833266	0.418	0.063	1.74966e-129
mpzl2b	1.92388e-152	0.822004	0.436	0.055	2.75191e-148
zgc:154125	6.48075e-149	0.790351	0.484	0.082	9.27006e-145
CABZ01068358.1	1.98912e-120	0.781311	0.407	0.071	2.84524e-116
cx32.2	5.74562e-102	0.759486	0.385	0.075	8.21853e-98
nucb1	6.47935e-80	0.757177	0.518	0.212	9.26806e-76
mgst1.2	1.66579e-136	0.75355	0.408	0.055	2.38274e-132
ctsla	1.89911e-65	0.746874	0.295	0.068	2.71648e-61
fuca2	6.46175e-82	0.743974	0.503	0.187	9.24289e-78
aplp2	8.24644e-108	0.74037	0.422	0.091	1.17957e-103
itm2ba	1.67783e-66	0.739824	0.75	0.551	2.39997e-62
tcima	2.1172e-52	0.724342	0.807	0.544	3.02845e-48
rnaseka	9.69825e-65	0.71771	0.483	0.211	1.38724e-60
stoml3b	6.25179e-74	0.717085	0.313	0.068	8.94256e-70
CABZ01001434.1	1.55833e-33	0.704864	0.212	0.066	2.22904e-29
mhc1zba	1.29939e-28	0.70372	0.924	0.927	1.85864e-24
CU459094.3	1.72839e-19	0.700164	0.198	0.087	2.47229e-15
zgc:123107	3.21792e-76	0.698551	0.474	0.171	4.60291e-72
cfp	3.97492e-105	0.693677	0.401	0.078	5.68572e-101
adipor2	2.2085e-53	0.69123	0.428	0.183	3.15904e-49
slc20a1b	1.88354e-39	0.688779	0.501	0.296	2.69421e-35
si:ch211-74m13.3	1.33951e-60	0.688389	0.309	0.082	1.91603e-56
bsg	4.55572e-59	0.687122	0.736	0.5	6.51651e-55
zgc:64051	1.39532e-42	0.685463	0.881	0.802	1.99587e-38
lygl1	5.48507e-29	0.684588	0.681	0.446	7.84585e-25
cd99l2	6.91755e-95	0.683762	0.45	0.121	9.89486e-91
fzd2	2.16335e-108	0.680532	0.393	0.074	3.09445e-104
zgc:174863	1.12055e-40	0.66596	0.463	0.249	1.60283e-36
si:dkey-33i11.1	2.9327e-95	0.654677	0.423	0.106	4.19493e-91
smox	1.5358e-38	0.650687	0.511	0.303	2.19681e-34
acsl4b	4.04203e-79	0.650102	0.317	0.064	5.78172e-75
ctsk	2.53892e-68	0.640538	0.477	0.186	3.63168e-64
mpp1	4.78618e-86	0.637737	0.427	0.12	6.84615e-82
hbegfb	3.52151e-91	0.629879	0.39	0.084	5.03716e-87
lgmn	1.94061e-74	0.628346	0.378	0.103	2.77585e-70
rnaset2l	2.16189e-58	0.627787	0.497	0.224	3.09236e-54
tmem59	2.22447e-53	0.624112	0.546	0.295	3.18188e-49
lgals2a	6.47666e-50	0.623853	0.447	0.195	9.26422e-46
rnf213a	4.41193e-37	0.613667	0.518	0.324	6.31082e-33
cst3	6.87573e-42	0.612762	0.617	0.438	9.83505e-38
hspb1	8.45396e-37	0.612018	0.445	0.22	1.20925e-32
cebpa	2.38201e-72	0.607926	0.371	0.1	3.40723e-68
lipg	1.64438e-53	0.607137	0.16	0.018	2.35212e-49
lta4h	3.92269e-71	0.601343	0.35	0.095	5.61102e-67
abcc5	1.24436e-61	0.600363	0.409	0.152	1.77994e-57
si:ch211-132p1.3	1.42345e-21	0.600295	0.411	0.281	2.0361e-17
il10ra	9.72905e-38	0.585267	0.397	0.199	1.39164e-33
caspb	9.50589e-40	0.582052	0.379	0.176	1.35972e-35
b2m	9.8464e-22	0.574022	0.989	0.978	1.40843e-17
abca1b	8.19527e-90	0.568165	0.312	0.052	1.17225e-85
prokr1a	1.7712e-79	0.567687	0.389	0.104	2.53353e-75
pmaip1	1.90459e-17	0.564308	0.459	0.331	2.72432e-13
slc30a1a	8.87008e-56	0.538042	0.376	0.132	1.26878e-51
ppib	2.1691e-33	0.537146	0.555	0.391	3.10268e-29
fgl2a	4.66252e-57	0.530837	0.357	0.112	6.66927e-53
si:busm1-194e12.11	5.05307e-34	0.527649	0.548	0.335	7.2279e-30
ms4a17a.6	5.09218e-21	0.518422	0.484	0.356	7.28386e-17
BX323596.2	2.53389e-10	0.510218	0.184	0.104	3.62447e-06
lgals9l3	5.20671e-83	0.508575	0.324	0.063	7.44767e-79
zgc:63831	2.65359e-23	0.508223	0.527	0.406	3.79569e-19
si:dkey-7j14.6	3.57965e-29	0.504848	0.479	0.316	5.12033e-25
CABZ01073795.1	2.39981e-32	0.502907	0.195	0.059	3.43269e-28
si:dkey-32n7.4	3.08992e-61	0.499113	0.347	0.105	4.41983e-57
clic2	1.78287e-31	0.498114	0.449	0.244	2.55021e-27
prss16	4.65918e-70	0.493529	0.294	0.063	6.6645e-66
tmem176l.4	3.79742e-64	0.488235	0.246	0.045	5.43183e-60
CABZ01080568.1	1.16545e-16	0.486079	0.766	0.721	1.66705e-12
slc7a7	6.50744e-55	0.485022	0.345	0.111	9.30824e-51
ddit3	3.05187e-08	0.484988	0.517	0.489	0.000436539
mpeg1.1	7.99274e-44	0.473472	0.7	0.38	1.14328e-39
il1b	6.06465e-24	0.469631	0.264	0.12	8.67488e-20
ccr2	8.97219e-75	0.468938	0.238	0.032	1.28338e-70
cd22	5.64201e-81	0.468314	0.241	0.028	8.07034e-77
ccl35.1	1.70075e-21	0.466804	0.597	0.427	2.43276e-17
abhd12	3.17493e-57	0.464075	0.299	0.082	4.54142e-53
ctsc	5.18552e-45	0.459887	0.35	0.137	7.41737e-41
rac1a	4.15533e-75	0.459808	0.265	0.043	5.94379e-71
mertka	2.29386e-86	0.459586	0.28	0.04	3.28114e-82
ltb4r	1.19347e-83	0.459364	0.271	0.038	1.70715e-79
AL831726.2	2.14364e-34	0.444677	0.292	0.115	3.06626e-30
mhc1uba	2.5059e-08	0.442874	0.943	0.929	0.000358445
ckbb	1.37442e-16	0.442684	0.477	0.348	1.96597e-12
hexb	1.07435e-35	0.437946	0.347	0.159	1.53676e-31
zgc:172090	3.27869e-38	0.435204	0.272	0.094	4.68984e-34
mmp14b	6.05997e-63	0.433963	0.228	0.038	8.66819e-59
BX548028.1	3.57584e-12	0.433182	0.384	0.292	5.11489e-08
slc1a3a	4.20504e-74	0.432029	0.266	0.044	6.01488e-70
itgb2	3.17532e-23	0.431601	0.466	0.315	4.54198e-19
timp4.3	1.49801e-39	0.430229	0.176	0.038	2.14275e-35
itgae.2	1.72389e-17	0.429753	0.567	0.455	2.46586e-13
mxc	8.66832e-13	0.429696	0.204	0.109	1.23992e-08
fabp11a	7.24141e-20	0.428904	0.175	0.067	1.03581e-15
si:ch211-274k16.2	1.96183e-13	0.42663	0.185	0.095	2.80621e-09
g0s2	2.85711e-17	0.424206	0.185	0.082	4.08681e-13
cxcr3.2	3.04263e-57	0.420305	0.304	0.082	4.35218e-53
cd9a	3.10846e-38	0.419538	0.302	0.116	4.44634e-34
slc3a2b	9.84711e-20	0.414697	0.318	0.183	1.40853e-15
serpine1	3.82194e-20	0.406277	0.11	0.029	5.4669e-16
m6pr	1.17046e-24	0.405646	0.352	0.194	1.67422e-20
si:cabz01074946.1	5.50811e-09	0.402877	0.275	0.193	7.8788e-05
si:dkey-102g19.3	5.73481e-70	0.402252	0.298	0.061	8.20308e-66
pecam1	1.76457e-74	0.394319	0.257	0.04	2.52404e-70
tnfsf12	3.61648e-87	0.392971	0.255	0.029	5.17302e-83
tmem131	1.90021e-20	0.39272	0.34	0.201	2.71807e-16
entpd1	2.5859e-47	0.386645	0.294	0.092	3.69887e-43
tmem63ba	2.36618e-66	0.385134	0.223	0.033	3.38458e-62
BX682234.1	3.42358e-36	0.374667	0.226	0.069	4.89709e-32
CABZ01078737.1	3.34385e-32	0.373807	0.381	0.185	4.78305e-28
hsp90b1	9.18351e-10	0.372074	0.305	0.22	1.31361e-05
si:dkey-58f10.11	3.99006e-50	0.369866	0.226	0.05	5.70739e-46
agtrap	1.81093e-71	0.363366	0.213	0.025	2.59036e-67
si:ch73-237c6.1	1.34537e-44	0.362834	0.259	0.075	1.92442e-40
ctsa	9.16925e-32	0.361539	0.349	0.164	1.31157e-27
srgap3	2.45451e-26	0.358638	0.253	0.109	3.51093e-22
atp6ap1b	1.85052e-31	0.3584	0.257	0.099	2.64699e-27
cyba	1.11424e-12	0.354857	0.43	0.319	1.59381e-08
dpp7	5.80962e-35	0.352956	0.266	0.096	8.31007e-31
ctss2.1	2.22528e-12	0.350965	0.483	0.381	3.18304e-08
csf1ra	8.69217e-58	0.350469	0.233	0.045	1.24333e-53
mafbb	1.06455e-31	0.348066	0.251	0.09	1.52273e-27
slc2a6	1.82482e-37	0.344115	0.172	0.038	2.61022e-33
sdcbp2	2.55152e-14	0.342673	0.399	0.289	3.6497e-10
cd81a	2.69847e-29	0.341242	0.384	0.195	3.85989e-25
plekho1b	6.35968e-27	0.337094	0.342	0.167	9.09689e-23
swap70b	1.96073e-46	0.3362	0.243	0.063	2.80462e-42
fosl1a	7.84835e-21	0.335464	0.288	0.146	1.12263e-16
ptx4	4.45924e-77	0.333053	0.181	0.011	6.3785e-73
si:ch73-248e21.5	8.60746e-13	0.332777	0.347	0.24	1.23121e-08
plek	2.67288e-13	0.331602	0.365	0.255	3.82329e-09
il6r	2.39935e-69	0.330714	0.217	0.027	3.43204e-65
nfil3-6	4.09345e-21	0.326292	0.227	0.1	5.85527e-17
csf2rb	5.72052e-24	0.325908	0.257	0.115	8.18263e-20
cndp2	1.02405e-25	0.325455	0.265	0.116	1.4648e-21
slc35f6	6.78654e-20	0.322623	0.262	0.133	9.70747e-16
pgd	1.0426e-32	0.31924	0.261	0.098	1.49133e-28
atp6v0b	1.35499e-18	0.312736	0.279	0.152	1.93818e-14
il4r.2	2.57338e-52	0.311225	0.171	0.023	3.68097e-48
entpd2a.1	3.45109e-48	0.310028	0.207	0.042	4.93645e-44
abi1b	2.72402e-53	0.304956	0.193	0.031	3.89645e-49
degs1	1.6631e-12	0.303965	0.281	0.182	2.37889e-08
ttyh3a	6.10307e-21	0.303941	0.352	0.197	8.72984e-17
si:dkey-148a17.6	1.80109e-30	0.303108	0.255	0.096	2.57627e-26
CABZ01041494.1	8.26895e-43	0.296126	0.21	0.051	1.18279e-38
CU928117.1	3.57774e-27	0.294022	0.212	0.077	5.1176e-23
plin2	4.2863e-21	0.290974	0.172	0.063	6.13112e-17
si:ch211-171h4.6	3.1948e-32	0.290787	0.269	0.1	4.56984e-28
scarb2a	4.04364e-11	0.288135	0.256	0.164	5.78402e-07
CABZ01088428.1	1.51054e-11	0.283431	0.151	0.074	2.16067e-07
CABZ01054965.1	1.25742e-17	0.280153	0.253	0.132	1.79862e-13
si:dkey-222f2.7	4.70547e-50	0.279744	0.166	0.023	6.73071e-46
si:ch211-222k6.3	1.47905e-51	0.279384	0.185	0.029	2.11564e-47
pycard	1.22195e-08	0.277844	0.293	0.214	0.000174788
si:dkey-205h13.1	9.76733e-28	0.277272	0.123	0.026	1.39712e-23
itgae.1	1.41022e-30	0.275988	0.183	0.053	2.01718e-26
zgc:153184	1.30856e-52	0.27585	0.199	0.034	1.87177e-48
prcp	7.08204e-38	0.274304	0.21	0.057	1.01301e-33
serinc2	1.79095e-09	0.27385	0.314	0.232	2.56178e-05
elovl1b	1.04055e-10	0.273697	0.356	0.262	1.4884e-06
cpvl	1.78302e-28	0.268073	0.202	0.068	2.55043e-24
pdgfba	1.75061e-42	0.268028	0.199	0.045	2.50408e-38
cd2ap	2.15321e-16	0.267565	0.295	0.171	3.07995e-12
igf2b	7.17747e-33	0.266595	0.153	0.034	1.02666e-28
mgat1b	6.74028e-26	0.265784	0.176	0.057	9.6413e-22
b2ml	1.61517e-07	0.264694	0.943	0.948	0.00231035
ccng2	2.38076e-09	0.261727	0.42	0.326	3.40544e-05
glud1a	2.88766e-15	0.261662	0.205	0.103	4.13052e-11
sgk1	7.71768e-17	0.260062	0.181	0.078	1.10394e-12
si:dkey-265e15.2	1.10291e-33	0.259341	0.176	0.045	1.5776e-29
si:ch211-286b5.9	3.6231e-55	0.25924	0.15	0.013	5.18248e-51
cd83	1.6248e-06	0.258633	0.241	0.174	0.0232411
slc45a4	2.07268e-41	0.256351	0.191	0.043	2.96477e-37
fkbp2	9.68046e-14	0.255169	0.256	0.148	1.38469e-09
stab1	2.46776e-50	0.253876	0.152	0.018	3.52988e-46
rasgef1ba	1.65787e-21	0.252753	0.25	0.11	2.37141e-17
si:dkey-56i24.1	6.40051e-14	0.251714	0.222	0.12	9.15529e-10
dnase2	2.82337e-19	0.250423	0.255	0.125	4.03854e-15
tcirg1b	2.33733e-19	0.250099	0.215	0.098	3.34332e-15

## Sheet: MarkersMG_sign_up_hs_orthologs
	initial_alias	ortholog_name
	APOC1	APOC1
	LGALS3BPB	LGALS3BP
	APOEB	APOE
	MS4A17A.10	MS4A4A
	HAVCR1	HAVCR1
	SLC22A21	SLC22A4
	SLC22A21	SLC22A5
	CH25H	CH25H
	LGALS9L1	LGALS9
	IFI30	IFI30
	CD74A	CD74
	FCER1GL	FCER1G
	HAVCR2	HAVCR2
	CTSH	CTSH
	SLCO2B1	SLCO2B1
	C1QC	C1QC
mhc2daa	SI:BUSM1-266F07.2	N/A
	SDC4	SDC4
	CD74B	CD74
	TSPAN36	N/A
	ASAH1B	ASAH1
	ALOX5AP	ALOX5AP
	SI:CH211-212K18.7	CD68
	HAMP	HAMP
	SI:DKEY-192G7.3	N/A
	MRC1B	MRC1
	SI:DKEY-26C10.5	N/A
	GLULA	GLUL
	SCPEP1	SCPEP1
	ZGC:103700	HLA-DOB
	GNG10	GNG10
	CTSZ	CTSZ
	NPC2	NPC2
	SI:CH73-158P21.3	HLA-DOB
	MARCO	MARCO
	MHC2B	HLA-DOB
	PSAP	PSAP
	CTSS2.2	CTSS
	CR759843.2	N/A
	SI:ZFOS-741A10.3	N/A
	TGM2L	N/A
	ANXA3B	ANXA3
	MCAMB	MCAM
	CMKLR1	CMKLR1
	MFAP4	MFAP4
	CSF1RB	CSF1R
	VMP1	VMP1
	CD63	CD63
	SI:CH211-102C2.4	N/A
	SI:DKEY-27H10.2	N/A
	SI:CH73-86N18.1	CLEC4F
	CTSBA	CTSB
	SCN4BB	SCN4B
	HSPA5	HSPA5
	ZGC:158343	IER3
	SI:CH1073-392O20.2	TGOLN2
	CTSD	CTSD
	GRNA	GRN
	NAGA	NAGA
	SLC3A2A	SLC3A2
	ATP1B1A	ATP1B1
	DHRS9	DHRS9
	GM2A	GM2A
	FOSB	FOSB
	C1QA	C1QA
	ATP6V0CA	ATP6V0C
	C1QB	C1QB
	MS4A17A.9	MS4A4A
	MPZL2B	MPZL2
	ZGC:154125	FCGR3A
	CABZ01068358.1	N/A
	CX32.2	GJA4
	NUCB1	NUCB1
	MGST1.2	MGST1
	CTSLA	CTSL
	FUCA2	FUCA2
	APLP2	APLP2
	ITM2BA	ITM2B
	TCIMA	TCIM
	RNASEKA	RNASEK
	STOML3B	STOML3
	CABZ01001434.1	N/A
	MHC1ZBA	HLA-A
	CU459094.3	N/A
	ZGC:123107	HLA-DOA
	CFP	CFP
	ADIPOR2	ADIPOR2
	SLC20A1B	SLC20A1
	SI:CH211-74M13.3	ICAM1
	BSG	BSG
	ZGC:64051	CD53
	LYGL1	LYG1
	CD99L2	CD99L2
	FZD2	FZD2
	ZGC:174863	N/A
	SI:DKEY-33I11.1	N/A
	SMOX	SMOX
	ACSL4B	ACSL4
	CTSK	CTSK
	MPP1	MPP1
	HBEGFB	HBEGF
	LGMN	LGMN
	RNASET2L	N/A
	TMEM59	TMEM59
	LGALS2A	LGALS2
	RNF213A	RNF213
	CST3	CST3
	HSPB1	HSPB1
	CEBPA	CEBPA
	LIPG	LIPG
	LTA4H	LTA4H
	ABCC5	ABCC5
	SI:CH211-132P1.3	LECT2
	IL10RA	IL10RA
	CASPB	CASP4
	B2M	B2M
	ABCA1B	ABCA1
	PROKR1A	PROKR1
	PMAIP1	PMAIP1
	SLC30A1A	SLC30A1
	PPIB	PPIB
	FGL2A	FGL2
	SI:BUSM1-194E12.11	HLA-DOB
	MS4A17A.6	MS4A4A
	LGALS9L3	LGALS9
	ZGC:63831	NAPSA
	SI:DKEY-7J14.6	MS4A14
	SI:DKEY-32N7.4	ITGAX
	CLIC2	CLIC2
	PRSS16	PRSS16
	TMEM176L.4	N/A
	CABZ01080568.1	DNAJA4
	SLC7A7	SLC7A7
	DDIT3	DDIT3
	MPEG1.1	MPEG1
	IL1B	IL1B
	CCR2	CCR2
	CCL35.1	CCL3
	ABHD12	ABHD12
	CTSC	CTSC
	RAC1A	RAC1
	MERTKA	MERTK
	LTB4R	LTB4R
	AL831726.2	N/A
	MHC1UBA	MR1
	CKBB	CKB
	HEXB	HEXB
	ZGC:172090	GIMAP1-GIMAP5
	MMP14B	MMP14
	BX548028.1	N/A
	SLC1A3A	SLC1A3
	ITGB2	ITGB2
	TIMP4.3	TIMP4
	ITGAE.2	ITGAE
	MXC	MX2
	FABP11A	FABP5
	SI:CH211-274K16.2	N/A
	G0S2	G0S2
	CXCR3.2	CXCR3
	CD9A	CD9
	SLC3A2B	SLC3A2
	SERPINE1	SERPINE1
	M6PR	M6PR
	SI:CABZ01074946.1	CD84
	SI:DKEY-102G19.3	LYPD8
	PECAM1	PECAM1
	TNFSF12	TNFSF12
	ENTPD1	ENTPD1
	TMEM63BA	TMEM63B
	CABZ01078737.1	IL1R2
	HSP90B1	HSP90B1
	SI:DKEY-58F10.11	N/A
	AGTRAP	AGTRAP
	SI:CH73-237C6.1	CFP
	CTSA	CTSA
	SRGAP3	SRGAP3
	ATP6AP1B	ATP6AP1
	CYBA	CYBA
	DPP7	DPP7
	CTSS2.1	CTSS
	CSF1RA	CSF1R
	MAFBB	MAFB
	SLC2A6	SLC2A6
	SDCBP2	SDCBP2
	CD81A	CD81
	PLEKHO1B	PLEKHO1
	SWAP70B	SWAP70
	FOSL1A	FOSL1
	PTX4	PTX4
	SI:CH73-248E21.5	N/A
	PLEK	PLEK
	IL6R	IL6R
	NFIL3-6	NFILZ
	CSF2RB	CSF2RB
	CNDP2	CNDP2
	SLC35F6	SLC35F6
	PGD	PGD
	ATP6V0B	ATP6V0B
	IL4R.2	N/A
	ENTPD2A.1	ENTPD2
	ABI1B	ABI1
	DEGS1	DEGS1
	TTYH3A	TTYH3
	SI:DKEY-148A17.6	N/A
	CABZ01041494.1	C5AR1
	CU928117.1	N/A
	PLIN2	PLIN2
	SI:CH211-171H4.6	N/A
	SCARB2A	SCARB2
	CABZ01088428.1	SLC9A1
	CABZ01054965.1	IL1R1
	SI:DKEY-222F2.7	N/A
	SI:CH211-222K6.3	N/A
	PYCARD	PYCARD
	SI:DKEY-205H13.1	TMEM269
	ITGAE.1	ITGAE
	ZGC:153184	RCSD1
	PRCP	PRCP
	SERINC2	SERINC2
	ELOVL1B	ELOVL1
	CPVL	CPVL
	PDGFBA	PDGFB
	CD2AP	CD2AP
	IGF2B	IGF2
	MGAT1B	MGAT1
	B2ML	B2M
	CCNG2	CCNG2
	GLUD1A	GLUD1
	SGK1	SGK1
	SI:DKEY-265E15.2	N/A
	SI:CH211-286B5.9	N/A
	CD83	CD83
	SLC45A4	SLC45A4
	FKBP2	FKBP2
	STAB1	STAB1
	RASGEF1BA	RASGEF1B
	SI:DKEY-56I24.1	N/A
	DNASE2	DNASE2
	TCIRG1B	TCIRG1

## Sheet: MG_Enrichr_list_hs_orthologs
ortholog_name
APOC1
LGALS3BP
APOE
MS4A4A
HAVCR1
SLC22A4
SLC22A5
CH25H
LGALS9
IFI30
CD74
FCER1G
HAVCR2
CTSH
SLCO2B1
C1QC
SDC4
CD74
ASAH1
ALOX5AP
CD68
HAMP
MRC1
GLUL
SCPEP1
HLA-DOB
GNG10
CTSZ
NPC2
HLA-DOB
MARCO
HLA-DOB
PSAP
CTSS
ANXA3
MCAM
CMKLR1
MFAP4
CSF1R
VMP1
CD63
CLEC4F
CTSB
SCN4B
HSPA5
IER3
TGOLN2
CTSD
GRN
NAGA
SLC3A2
ATP1B1
DHRS9
GM2A
FOSB
C1QA
ATP6V0C
C1QB
MS4A4A
MPZL2
FCGR3A
GJA4
NUCB1
MGST1
CTSL
FUCA2
APLP2
ITM2B
TCIM
RNASEK
STOML3
HLA-A
HLA-DOA
CFP
ADIPOR2
SLC20A1
ICAM1
BSG
CD53
LYG1
CD99L2
FZD2
SMOX
ACSL4
CTSK
MPP1
HBEGF
LGMN
TMEM59
LGALS2
RNF213
CST3
HSPB1
CEBPA
LIPG
LTA4H
ABCC5
LECT2
IL10RA
CASP4
B2M
ABCA1
PROKR1
PMAIP1
SLC30A1
PPIB
FGL2
HLA-DOB
MS4A4A
LGALS9
NAPSA
MS4A14
ITGAX
CLIC2
PRSS16
DNAJA4
SLC7A7
DDIT3
MPEG1
IL1B
CCR2
CCL3
ABHD12
CTSC
RAC1
MERTK
LTB4R
MR1
CKB
HEXB
GIMAP1-GIMAP5
MMP14
SLC1A3
ITGB2
TIMP4
ITGAE
MX2
FABP5
G0S2
CXCR3
CD9
SLC3A2
SERPINE1
M6PR
CD84
LYPD8
PECAM1
TNFSF12
ENTPD1
TMEM63B
IL1R2
HSP90B1
AGTRAP
CFP
CTSA
SRGAP3
ATP6AP1
CYBA
DPP7
CTSS
CSF1R
MAFB
SLC2A6
SDCBP2
CD81
PLEKHO1
SWAP70
FOSL1
PTX4
PLEK
IL6R
NFILZ
CSF2RB
CNDP2
SLC35F6
PGD
ATP6V0B
ENTPD2
ABI1
DEGS1
TTYH3
C5AR1
PLIN2
SCARB2
SLC9A1
IL1R1
PYCARD
TMEM269
ITGAE
RCSD1
PRCP
SERINC2
ELOVL1
CPVL
PDGFB
CD2AP
IGF2
MGAT1
B2M
CCNG2
GLUD1
SGK1
CD83
SLC45A4
FKBP2
STAB1
RASGEF1B
DNASE2
TCIRG1

## Sheet: MG_EnrichmentAnalysisVisualizer
term	p-value	q-value
Microglia	3.44375e-30	4.51131e-28
Monocytes	2.51087e-27	1.64462e-25
Macrophages	1.01811e-26	4.44575e-25
Osteoclasts	2.96235e-24	9.7017e-23
Kupffer Cells	4.88202e-22	1.27909e-20
Alveolar Macrophages	9.36816e-22	2.04538e-20
Osteoclast Precursor Cells	2.835e-20	5.30549e-19
Dendritic Cells	2.93802e-18	4.811e-17
Langerhans Cells	1.12101e-17	1.6317e-16
Red Pulp Macrophages	6.11641e-16	8.01249e-15
Hematopoietic Stem Cells	1.26195e-14	1.50286e-13
Microfold Cells	1.08486e-13	1.1843e-12
Neutrophils	1.36038e-13	1.37084e-12
Spermatozoa	1.69678e-13	1.5877e-12
Platelets	3.93052e-12	3.43266e-11
Pulmonary Alveolar Type II Cells	4.73302e-12	3.77276e-11
Myeloid-derived Suppressor Cells	4.89595e-12	3.77276e-11
Basophils	1.07106e-11	7.79491e-11
Plasmacytoid Dendritic Cells	2.63845e-10	1.81914e-09
Eosinophils	3.69308e-10	2.41897e-09
T Regulatory Cells	1.74713e-09	1.08988e-08
Megakaryocytes	1.69399e-07	1.00869e-06
Satellite Glial Cells	1.8531e-06	1.05546e-05
B Cells Naive	1.84785e-05	0.000100862
Mast Cells	2.14269e-05	0.000112277
Tuft Cells	5.95146e-05	0.000299862
B Cells	7.97778e-05	0.00038707
B Cells Memory	0.00010282	0.000478446
T Follicular Helper Cells	0.000105916	0.000478446
Thymocytes	0.000164317	0.000717517
Endothelial Cells	0.000741807	0.00313473
Plasma Cells	0.00127534	0.00522093
T Cells Naive	0.00332028	0.0131805
T Helper Cells	0.00342359	0.0131909
NK Cells	0.00456704	0.0170938
T Cells	0.00580035	0.0211068
Transient Cells	0.00660019	0.0233682
Sebocytes	0.00755815	0.0260557
Fibroblasts	0.00805926	0.0270708
Trophoblast Cells	0.00917056	0.0300336
Basal Cells	0.0127154	0.0406274
M?ller Cells	0.0149937	0.0467661
Astrocytes	0.0179793	0.0547742
Sertoli Cells	0.01985	0.0590989
Natural Killer T Cells	0.0289384	0.0842428
Stromal Cells	0.0338356	0.0963579
T Memory Cells	0.042034	0.117159

## Sheet: MG_GO_pathwaysResults
ID	Term	Ontology Source	Term PValue	Term PValue Corrected with Bonferroni step down	Group PValue	Group PValue Corrected with Bonferroni step down	GOLevels	GOGroups	% Associated Genes	Nr. Genes	Associated Genes Found
GO:0001776	leukocyte homeostasis	GO_BiologicalProcess-EBI-UniProt-GOA-ACAP-ARAP_05.04.2022_00h00	1.29812e-05	0.00397225	1.29812e-05	0.000142793	[2, 5]	Group00	7.76699	8	[BSG, CCR2, CD74, LGALS2, LGALS9, MERTK, PMAIP1, TCIRG1]
GO:1903281	positive regulation of calcium:sodium antiporter activity	GO_BiologicalProcess-EBI-UniProt-GOA-ACAP-ARAP_05.04.2022_00h00	0.000109738	0.028532	0.000109738	0.000438953	[6, 7, 8, 9, 10, 11, 12, 13, 14]	Group01	100	2	[ATP1B1, SLC9A1]
R-HSA:1474244	Extracellular matrix organization	REACTOME_Pathways_18.08.2022	1.93803e-08	7.19011e-06	1.93803e-08	4.06987e-07	[-1]	Group02	5.66667	17	[BSG, CTSB, CTSD, CTSK, CTSL, CTSS, ICAM1, ITGAE, ITGAX, ITGB2, MFAP4, MMP14, PDGFB, PECAM1, PPIB, SDC4, SERPINE1]
R-HSA:381183	ATF6 (ATF6-alpha) activates chaperone genes	REACTOME_Pathways_18.08.2022	0.00012963	0.0329261	0.00012963	0.000388891	[-1]	Group03	30	3	[DDIT3, HSP90B1, HSPA5]
GO:0006898	receptor-mediated endocytosis	GO_BiologicalProcess-EBI-UniProt-GOA-ACAP-ARAP_05.04.2022_00h00	6.20645e-10	2.38328e-07	6.20645e-10	1.55161e-08	[6]	Group04	6.61765	18	[APOC1, APOE, B2M, CD2AP, CD63, CD81, CD9, CTSL, FCER1G, ITGB2, M6PR, MARCO, MRC1, RAC1, RNASEK, SCARB2, SERPINE1, STAB1]
GO:0038024	cargo receptor activity	GO_BiologicalProcess-EBI-UniProt-GOA-ACAP-ARAP_05.04.2022_00h00	6.40285e-05	0.0174798	6.40285e-05	0.000448199	[6]	Group05	7.36842	7	[ABCA1, ITGB2, LGALS3BP, MARCO, MRC1, SCARB2, STAB1]
GO:0042590	antigen processing and presentation of exogenous peptide antigen via MHC class I	GO_BiologicalProcess-EBI-UniProt-GOA-ACAP-ARAP_05.04.2022_00h00	9.14484e-05	0.0243253	9.14484e-05	0.000457242	[5]	Group06	33.3333	3	[FCER1G, HLA-A, IFI30]
GO:0060055	angiogenesis involved in wound healing	GO_BiologicalProcess-EBI-UniProt-GOA-ACAP-ARAP_05.04.2022_00h00	0.000198196	0.0481616	0.000198196	0.000198196	[4, 5, 6, 7, 8, 9, 10]	Group07	14.2857	4	[ADIPOR2, MCAM, PRCP, SERPINE1]
GO:0002573	myeloid leukocyte differentiation	GO_BiologicalProcess-EBI-UniProt-GOA-ACAP-ARAP_05.04.2022_00h00	0.000153199	0.0381464	0.000153199	0.000306397	[5, 6, 7, 8, 9]	Group08	4.38596	10	[ATP6AP1, C1QC, CCL3, CD74, CD81, CEBPA, CSF1R, LGALS9, MAFB, TCIRG1]
GO:0055094	response to lipoprotein particle	GO_BiologicalProcess-EBI-UniProt-GOA-ACAP-ARAP_05.04.2022_00h00	2.68416e-08	9.90454e-06	2.68416e-08	5.0999e-07	[3, 5]	Group09	22.5806	7	[ABCA1, APOE, CD68, CD81, CD9, FCER1G, ITGB2]
GO:0071404	cellular response to low-density lipoprotein particle stimulus	GO_BiologicalProcess-EBI-UniProt-GOA-ACAP-ARAP_05.04.2022_00h00	1.65457e-06	0.000564207	2.68416e-08	5.0999e-07	[4, 6]	Group09	25	5	[ABCA1, CD81, CD9, FCER1G, ITGB2]
GO:0051541	elastin metabolic process	GO_BiologicalProcess-EBI-UniProt-GOA-ACAP-ARAP_05.04.2022_00h00	6.1441e-05	0.0168348	4.38373e-06	5.26048e-05	[5, 6]	Group10	37.5	3	[CST3, CTSL, HBEGF]
GO:1903019	negative regulation of glycoprotein metabolic process	GO_BiologicalProcess-EBI-UniProt-GOA-ACAP-ARAP_05.04.2022_00h00	3.21569e-05	0.00922902	4.38373e-06	5.26048e-05	[4, 5, 6, 7]	Group10	22.2222	4	[CST3, HBEGF, ITM2B, TMEM59]
GO:0046718	viral entry into host cell	GO_BiologicalProcess-EBI-UniProt-GOA-ACAP-ARAP_05.04.2022_00h00	1.43427e-08	5.33548e-06	2.60869e-09	5.73912e-08	[3, 6]	Group11	8.125	13	[BSG, CD74, CD81, CH25H, CTSB, CTSL, HAVCR1, ICAM1, LGALS9, MRC1, RNASEK, SCARB2, SLC3A2]
GO:0044409	entry into host	GO_BiologicalProcess-EBI-UniProt-GOA-ACAP-ARAP_05.04.2022_00h00	2.60869e-09	9.83477e-07	2.60869e-09	5.73912e-08	[5]	Group11	8.38323	14	[BSG, CD74, CD81, CH25H, CTSB, CTSL, FUCA2, HAVCR1, ICAM1, LGALS9, MRC1, RNASEK, SCARB2, SLC3A2]
R-HSA:1660662	Glycosphingolipid metabolism	REACTOME_Pathways_18.08.2022	0.000117235	0.0303638	2.88594e-05	0.000288594	[-1]	Group12	10.8696	5	[ASAH1, CTSA, GM2A, HEXB, PSAP]
GO:0046514	ceramide catabolic process	GO_BiologicalProcess-EBI-UniProt-GOA-ACAP-ARAP_05.04.2022_00h00	0.000125503	0.0321288	2.88594e-05	0.000288594	[6, 7, 8]	Group12	16	4	[ASAH1, GM2A, HEXB, NAGA]
R-HSA:168249	Innate Immune System	REACTOME_Pathways_18.08.2022	2.82519e-21	1.13008e-18	2.82519e-21	1.04532e-19	[-1]	Group13	4.86436	52	[ABI1, ASAH1, ATP6V0B, ATP6V0C, B2M, C1QA, C1QB, C1QC, C5AR1, CASP4, CCR2, CD53, CD63, CD68, CD81, CFP, CST3, CTSA, CTSB, CTSC, CTSD, CTSH, CTSK, CTSL, CTSS, CTSZ, CYBA, DEGS1, DPP7, FABP5, FCER1G, FCGR3A, FGL2, FUCA2, GM2A, GRN, HEXB, HLA-A, HSP90B1, IL1B, ITGAX, ITGB2, LGMN, LTA4H, MGST1, NPC2, PECAM1, PRCP, PSAP, PYCARD, RAC1, TCIRG1]
R-HSA:6798695	Neutrophil degranulation	REACTOME_Pathways_18.08.2022	1.25342e-22	5.0262e-20	2.82519e-21	1.04532e-19	[-1]	Group13	7.88382	38	[ASAH1, ATP6V0C, B2M, C5AR1, CD53, CD63, CD68, CFP, CST3, CTSA, CTSB, CTSC, CTSD, CTSH, CTSS, CTSZ, CYBA, DEGS1, DPP7, FABP5, FCER1G, FGL2, FUCA2, GM2A, GRN, HEXB, HLA-A, ITGAX, ITGB2, LTA4H, MGST1, NPC2, PECAM1, PRCP, PSAP, PYCARD, RAC1, TCIRG1]
R-HSA:381426	Regulation of Insulin-like Growth Factor (IGF) transport and uptake by Insulin-like Growth Factor Binding Proteins (IGFBPs)	REACTOME_Pathways_18.08.2022	5.27735e-05	0.0146183	5.27735e-05	0.000474961	[-1]	Group14	6.4	8	[APLP2, APOE, CST3, FUCA2, HSP90B1, IGF2, NUCB1, TGOLN2]
R-HSA:8957275	Post-translational protein phosphorylation	REACTOME_Pathways_18.08.2022	0.000144084	0.0361651	5.27735e-05	0.000474961	[-1]	Group14	6.48148	7	[APLP2, APOE, CST3, FUCA2, HSP90B1, NUCB1, TGOLN2]
GO:0007596	blood coagulation	GO_BiologicalProcess-EBI-UniProt-GOA-ACAP-ARAP_05.04.2022_00h00	5.81878e-05	0.0160598	5.81878e-05	0.000465502	[3, 5]	Group15	4.4898	11	[APOE, BSG, CD9, ENTPD1, ENTPD2, FCER1G, HSPB1, MERTK, PDGFB, PLEK, SERPINE1]
GO:0030168	platelet activation	GO_BiologicalProcess-EBI-UniProt-GOA-ACAP-ARAP_05.04.2022_00h00	2.16525e-05	0.00640915	5.81878e-05	0.000465502	[3, 4, 6]	Group15	6.25	9	[APOE, BSG, CD9, ENTPD2, FCER1G, HSPB1, MERTK, PDGFB, PLEK]
GO:0006909	phagocytosis	GO_BiologicalProcess-EBI-UniProt-GOA-ACAP-ARAP_05.04.2022_00h00	4.27032e-06	0.0014092	4.27032e-06	5.55141e-05	[5]	Group16	4.31034	15	[ABCA1, ANXA3, APLP2, CCR2, CFP, CYBA, FCER1G, HAVCR1, IL1B, ITGB2, MARCO, MERTK, PECAM1, PYCARD, RAC1]
GO:0050764	regulation of phagocytosis	GO_BiologicalProcess-EBI-UniProt-GOA-ACAP-ARAP_05.04.2022_00h00	0.000135937	0.0342561	4.27032e-06	5.55141e-05	[4, 5, 6]	Group16	6.54206	7	[APLP2, CFP, CYBA, FCER1G, IL1B, MERTK, PYCARD]
GO:0050766	positive regulation of phagocytosis	GO_BiologicalProcess-EBI-UniProt-GOA-ACAP-ARAP_05.04.2022_00h00	1.49803e-05	0.00453903	4.27032e-06	5.55141e-05	[3, 4, 5, 6, 7]	Group16	9.21053	7	[APLP2, CFP, CYBA, FCER1G, IL1B, MERTK, PYCARD]
GO:0016485	protein processing	GO_BiologicalProcess-EBI-UniProt-GOA-ACAP-ARAP_05.04.2022_00h00	2.4611e-05	0.0071864	4.4854e-07	7.17664e-06	[5, 6]	Group17	4.5283	12	[CASP4, CTSH, CTSL, CTSS, CTSZ, IL1R2, LGMN, MAFB, MMP14, PYCARD, SERPINE1, TMEM59]
GO:0031638	zymogen activation	GO_BiologicalProcess-EBI-UniProt-GOA-ACAP-ARAP_05.04.2022_00h00	9.52444e-06	0.0030002	4.4854e-07	7.17664e-06	[6, 7]	Group17	9.85915	7	[CTSH, CTSL, CTSZ, LGMN, MMP14, PYCARD, SERPINE1]
GO:0071677	positive regulation of mononuclear cell migration	GO_BiologicalProcess-EBI-UniProt-GOA-ACAP-ARAP_05.04.2022_00h00	1.2551e-05	0.00385316	4.4854e-07	7.17664e-06	[4, 5, 6, 7, 8, 9]	Group17	9.45946	7	[CCL3, CCR2, CD99L2, LGALS9, LGMN, PYCARD, SERPINE1]
GO:0072337	modified amino acid transport	GO_BiologicalProcess-EBI-UniProt-GOA-ACAP-ARAP_05.04.2022_00h00	5.92198e-05	0.0162854	6.68739e-05	0.000401243	[5]	Group18	12.5	5	[ABCC5, BSG, MGST1, SLC22A4, SLC22A5]
GO:0072349	modified amino acid transmembrane transporter activity	GO_BiologicalProcess-EBI-UniProt-GOA-ACAP-ARAP_05.04.2022_00h00	0.000198196	0.0481616	6.68739e-05	0.000401243	[4, 6]	Group18	14.2857	4	[ABCC5, BSG, SLC22A4, SLC22A5]
GO:0034635	glutathione transport	GO_BiologicalProcess-EBI-UniProt-GOA-ACAP-ARAP_05.04.2022_00h00	0.00012963	0.0329261	6.68739e-05	0.000401243	[5, 6, 7, 8, 9]	Group18	30	3	[ABCC5, BSG, MGST1]
GO:0042939	tripeptide transport	GO_BiologicalProcess-EBI-UniProt-GOA-ACAP-ARAP_05.04.2022_00h00	0.000176864	0.0435086	6.68739e-05	0.000401243	[7, 8]	Group18	27.2727	3	[ABCC5, BSG, MGST1]
R-HSA:6783783	Interleukin-10 signaling	REACTOME_Pathways_18.08.2022	5.57028e-07	0.000195517	2.37937e-11	7.13812e-10	[-1]	Group19	14.8936	7	[CCL3, CCR2, ICAM1, IL10RA, IL1B, IL1R1, IL1R2]
GO:0002456	T cell mediated immunity	GO_BiologicalProcess-EBI-UniProt-GOA-ACAP-ARAP_05.04.2022_00h00	5.956e-07	0.00020846	2.37937e-11	7.13812e-10	[5]	Group19	8.26446	10	[B2M, CCR2, CD81, CTSC, CTSH, HLA-A, ICAM1, IL1B, IL1R1, MR1]
GO:0002693	positive regulation of cellular extravasation	GO_BiologicalProcess-EBI-UniProt-GOA-ACAP-ARAP_05.04.2022_00h00	5.00842e-05	0.0139735	2.37937e-11	7.13812e-10	[4, 5, 6, 7, 8, 9]	Group19	20	4	[CCR2, CD99L2, ICAM1, IL1R1]
GO:1902624	positive regulation of neutrophil migration	GO_BiologicalProcess-EBI-UniProt-GOA-ACAP-ARAP_05.04.2022_00h00	4.02439e-05	0.011389	2.37937e-11	7.13812e-10	[4, 5, 6, 7, 8, 9, 10]	Group19	13.5135	5	[C5AR1, CD74, CD99L2, IL1R1, RAC1]
R-HSA:425407	SLC-mediated transmembrane transport	REACTOME_Pathways_18.08.2022	6.9769e-05	0.0189074	1.31984e-07	2.24373e-06	[-1]	Group20	4.4	11	[BSG, SLC1A3, SLC20A1, SLC22A4, SLC22A5, SLC2A6, SLC30A1, SLC3A2, SLC7A7, SLC9A1, SLCO2B1]
GO:0022853	active ion transmembrane transporter activity	GO_BiologicalProcess-EBI-UniProt-GOA-ACAP-ARAP_05.04.2022_00h00	3.62591e-06	0.00121468	1.31984e-07	2.24373e-06	[5, 7]	Group20	4.66667	14	[ABCC5, ATP1B1, ATP6V0B, ATP6V0C, BSG, SLC1A3, SLC20A1, SLC22A4, SLC3A2, SLC45A4, SLC9A1, SLCO2B1, TCIRG1, VMP1]
GO:0030004	cellular monovalent inorganic cation homeostasis	GO_BiologicalProcess-EBI-UniProt-GOA-ACAP-ARAP_05.04.2022_00h00	4.3029e-06	0.00141565	1.31984e-07	2.24373e-06	[6, 8]	Group20	7.62712	9	[ATP1B1, ATP6AP1, ATP6V0B, ATP6V0C, GRN, RNASEK, SLC1A3, SLC9A1, TCIRG1]
GO:0055067	monovalent inorganic cation homeostasis	GO_BiologicalProcess-EBI-UniProt-GOA-ACAP-ARAP_05.04.2022_00h00	7.5922e-05	0.020423	1.31984e-07	2.24373e-06	[7]	Group20	5.32544	9	[ATP1B1, ATP6AP1, ATP6V0B, ATP6V0C, GRN, RNASEK, SLC1A3, SLC9A1, TCIRG1]
R-HSA:109582	Hemostasis	REACTOME_Pathways_18.08.2022	3.90888e-10	1.50883e-07	3.90888e-10	1.01631e-08	[-1]	Group21	4.34783	27	[ABHD12, APLP2, ATP1B1, BSG, CD63, CD74, CD84, CD9, CD99L2, FCER1G, GNG10, HSPA5, IGF2, ITGAX, ITGB2, LGALS3BP, MERTK, PDGFB, PECAM1, PLEK, PRCP, PSAP, RAC1, SDC4, SERPINE1, SLC3A2, SLC7A7]
R-HSA:114608	Platelet degranulation	REACTOME_Pathways_18.08.2022	1.16618e-07	4.19826e-05	3.90888e-10	1.01631e-08	[-1]	Group21	8.52713	11	[APLP2, CD63, CD9, HSPA5, IGF2, LGALS3BP, PDGFB, PECAM1, PLEK, PSAP, SERPINE1]
R-HSA:202733	Cell surface interactions at the vascular wall	REACTOME_Pathways_18.08.2022	2.15798e-09	8.17876e-07	3.90888e-10	1.01631e-08	[-1]	Group21	9.48905	13	[ATP1B1, BSG, CD74, CD84, CD99L2, FCER1G, ITGAX, ITGB2, MERTK, PECAM1, SDC4, SLC3A2, SLC7A7]
R-HSA:76002	Platelet activation, signaling and aggregation	REACTOME_Pathways_18.08.2022	1.25918e-07	4.52047e-05	3.90888e-10	1.01631e-08	[-1]	Group21	5.70342	15	[ABHD12, APLP2, CD63, CD9, FCER1G, GNG10, HSPA5, IGF2, LGALS3BP, PDGFB, PECAM1, PLEK, PSAP, RAC1, SERPINE1]
R-HSA:76005	Response to elevated platelet cytosolic Ca2+	REACTOME_Pathways_18.08.2022	1.72175e-07	6.16386e-05	3.90888e-10	1.01631e-08	[-1]	Group21	8.20895	11	[APLP2, CD63, CD9, HSPA5, IGF2, LGALS3BP, PDGFB, PECAM1, PLEK, PSAP, SERPINE1]
R-HSA:109582	Hemostasis	REACTOME_Pathways_18.08.2022	3.90888e-10	1.50883e-07	1.25936e-12	3.904e-11	[-1]	Group22	4.34783	27	[ABHD12, APLP2, ATP1B1, BSG, CD63, CD74, CD84, CD9, CD99L2, FCER1G, GNG10, HSPA5, IGF2, ITGAX, ITGB2, LGALS3BP, MERTK, PDGFB, PECAM1, PLEK, PRCP, PSAP, RAC1, SDC4, SERPINE1, SLC3A2, SLC7A7]
R-HSA:202733	Cell surface interactions at the vascular wall	REACTOME_Pathways_18.08.2022	2.15798e-09	8.17876e-07	1.25936e-12	3.904e-11	[-1]	Group22	9.48905	13	[ATP1B1, BSG, CD74, CD84, CD99L2, FCER1G, ITGAX, ITGB2, MERTK, PECAM1, SDC4, SLC3A2, SLC7A7]
R-HSA:210991	Basigin interactions	REACTOME_Pathways_18.08.2022	0.000125503	0.0321288	1.25936e-12	3.904e-11	[-1]	Group22	16	4	[ATP1B1, BSG, SLC3A2, SLC7A7]
R-HSA:5660862	Defective SLC7A7 causes lysinuric protein intolerance (LPI)	REACTOME_Pathways_18.08.2022	0.000109738	0.028532	1.25936e-12	3.904e-11	[-1]	Group22	100	2	[SLC3A2, SLC7A7]
GO:1990266	neutrophil migration	GO_BiologicalProcess-EBI-UniProt-GOA-ACAP-ARAP_05.04.2022_00h00	2.81888e-09	1.0599e-06	1.25936e-12	3.904e-11	[5, 7, 8]	Group22	9.28571	13	[BSG, C5AR1, CCL3, CD74, CD99L2, FCER1G, IL1B, IL1R1, ITGB2, MPP1, PECAM1, PPIB, RAC1]
GO:0032602	chemokine production	GO_BiologicalProcess-EBI-UniProt-GOA-ACAP-ARAP_05.04.2022_00h00	1.12327e-05	0.00348214	2.93853e-08	5.28936e-07	[3, 6]	Group23	7.92079	8	[CD74, CD84, CSF1R, HAVCR2, IL1B, IL6R, LGALS9, PYCARD]
GO:0032642	regulation of chemokine production	GO_BiologicalProcess-EBI-UniProt-GOA-ACAP-ARAP_05.04.2022_00h00	1.12327e-05	0.00348214	2.93853e-08	5.28936e-07	[4, 5, 6, 7]	Group23	7.92079	8	[CD74, CD84, CSF1R, HAVCR2, IL1B, IL6R, LGALS9, PYCARD]
GO:0046394	carboxylic acid biosynthetic process	GO_BiologicalProcess-EBI-UniProt-GOA-ACAP-ARAP_05.04.2022_00h00	1.77103e-05	0.0053131	2.93853e-08	5.28936e-07	[5, 6]	Group23	4.05797	14	[ALOX5AP, APOC1, CD74, DEGS1, DHRS9, ELOVL1, FABP5, GLUD1, GLUL, IL1B, LIPG, LTA4H, PYCARD, SLC1A3]
GO:0032722	positive regulation of chemokine production	GO_BiologicalProcess-EBI-UniProt-GOA-ACAP-ARAP_05.04.2022_00h00	1.4494e-06	0.000495695	2.93853e-08	5.28936e-07	[4, 5, 6, 7, 8]	Group23	10.3896	8	[CD74, CD84, CSF1R, HAVCR2, IL1B, IL6R, LGALS9, PYCARD]
GO:0032757	positive regulation of interleukin-8 production	GO_BiologicalProcess-EBI-UniProt-GOA-ACAP-ARAP_05.04.2022_00h00	0.000100854	0.0266256	2.93853e-08	5.28936e-07	[4, 5, 6, 7, 8]	Group23	8.4507	6	[CD74, DDIT3, IL1B, LGALS9, PYCARD, SERPINE1]
GO:0046456	icosanoid biosynthetic process	GO_BiologicalProcess-EBI-UniProt-GOA-ACAP-ARAP_05.04.2022_00h00	7.27592e-05	0.019645	2.93853e-08	5.28936e-07	[6, 7]	Group23	8.95522	6	[ALOX5AP, CD74, FABP5, IL1B, LTA4H, PYCARD]
GO:0002578	negative regulation of antigen processing and presentation	GO_BiologicalProcess-EBI-UniProt-GOA-ACAP-ARAP_05.04.2022_00h00	1.42604e-06	0.000489131	2.07467e-08	4.14933e-07	[3, 4, 5]	Group24	44.4444	4	[CD68, FGL2, HLA-DOA, HLA-DOB]
GO:0002580	regulation of antigen processing and presentation of peptide or polysaccharide antigen via MHC class II	GO_BiologicalProcess-EBI-UniProt-GOA-ACAP-ARAP_05.04.2022_00h00	1.12305e-05	0.00349268	2.07467e-08	4.14933e-07	[4, 5]	Group24	60	3	[HLA-DOA, HLA-DOB, PYCARD]
GO:0002583	regulation of antigen processing and presentation of peptide antigen	GO_BiologicalProcess-EBI-UniProt-GOA-ACAP-ARAP_05.04.2022_00h00	2.2287e-05	0.00655237	2.07467e-08	4.14933e-07	[4, 5]	Group24	50	3	[HLA-DOA, HLA-DOB, PYCARD]
GO:0002604	regulation of dendritic cell antigen processing and presentation	GO_BiologicalProcess-EBI-UniProt-GOA-ACAP-ARAP_05.04.2022_00h00	0.000176864	0.0435086	2.07467e-08	4.14933e-07	[4, 5]	Group24	27.2727	3	[CD68, CD74, FGL2]
GO:0002586	regulation of antigen processing and presentation of peptide antigen via MHC class II	GO_BiologicalProcess-EBI-UniProt-GOA-ACAP-ARAP_05.04.2022_00h00	4.52729e-06	0.0014759	2.07467e-08	4.14933e-07	[5, 6]	Group24	75	3	[HLA-DOA, HLA-DOB, PYCARD]
GO:0002587	negative regulation of antigen processing and presentation of peptide antigen via MHC class II	GO_BiologicalProcess-EBI-UniProt-GOA-ACAP-ARAP_05.04.2022_00h00	0.000109738	0.028532	2.07467e-08	4.14933e-07	[5, 6, 7]	Group24	100	2	[HLA-DOA, HLA-DOB]
R-HSA:1236977	Endosomal/Vacuolar pathway	REACTOME_Pathways_18.08.2022	3.67375e-06	0.00122703	5.50829e-15	1.76265e-13	[-1]	Group25	36.3636	4	[B2M, CTSL, CTSS, HLA-A]
R-HSA:1679131	Trafficking and processing of endosomal TLR	REACTOME_Pathways_18.08.2022	2.00353e-09	7.63347e-07	5.50829e-15	1.76265e-13	[-1]	Group25	46.1538	6	[CTSB, CTSK, CTSL, CTSS, HSP90B1, LGMN]
R-HSA:2132295	MHC class II antigen presentation	REACTOME_Pathways_18.08.2022	5.63546e-10	2.16965e-07	5.50829e-15	1.76265e-13	[-1]	Group25	10.5691	13	[CD74, CTSA, CTSB, CTSC, CTSD, CTSH, CTSK, CTSL, CTSS, HLA-DOA, HLA-DOB, IFI30, LGMN]
GO:0019886	antigen processing and presentation of exogenous peptide antigen via MHC class II	GO_BiologicalProcess-EBI-UniProt-GOA-ACAP-ARAP_05.04.2022_00h00	4.72656e-13	1.86699e-10	5.50829e-15	1.76265e-13	[5]	Group25	32.2581	10	[B2M, CD74, CTSD, CTSL, CTSS, FCER1G, HLA-DOA, HLA-DOB, IFI30, LGMN]
GO:0097067	cellular response to thyroid hormone stimulus	GO_BiologicalProcess-EBI-UniProt-GOA-ACAP-ARAP_05.04.2022_00h00	3.21569e-05	0.00922902	5.50829e-15	1.76265e-13	[5, 6]	Group25	22.2222	4	[CTSB, CTSH, CTSL, CTSS]
GO:0002726	positive regulation of T cell cytokine production	GO_BiologicalProcess-EBI-UniProt-GOA-ACAP-ARAP_05.04.2022_00h00	9.79638e-06	0.00306627	5.50829e-15	1.76265e-13	[5, 6, 7, 8, 9]	Group25	17.8571	5	[B2M, CD81, HLA-A, IL1B, IL1R1]
GO:0032103	positive regulation of response to external stimulus	GO_BiologicalProcess-EBI-UniProt-GOA-ACAP-ARAP_05.04.2022_00h00	3.76044e-11	1.45905e-08	3.07544e-11	8.91878e-10	[3, 4, 5]	Group26	5.24109	25	[ALOX5AP, C5AR1, CASP4, CCL3, CCR2, CD74, CD81, CEBPA, CMKLR1, CSF1R, CTSC, CYBA, GRN, HAVCR2, HSPB1, IL1B, IL6R, LGALS2, LGALS9, LGMN, PDGFB, PYCARD, RAC1, SERPINE1, SWAP70]
GO:0031349	positive regulation of defense response	GO_BiologicalProcess-EBI-UniProt-GOA-ACAP-ARAP_05.04.2022_00h00	7.07809e-06	0.00225791	3.07544e-11	8.91878e-10	[3, 4, 5, 6]	Group26	4.40252	14	[ALOX5AP, CASP4, CCL3, CCR2, CD81, CEBPA, CTSC, CYBA, GRN, HAVCR2, IL1B, LGALS2, PYCARD, SERPINE1]
GO:0043030	regulation of macrophage activation	GO_BiologicalProcess-EBI-UniProt-GOA-ACAP-ARAP_05.04.2022_00h00	3.87095e-07	0.000136257	3.07544e-11	8.91878e-10	[4, 5, 6]	Group26	12.3077	8	[CCL3, CD74, CD84, CEBPA, CTSC, GRN, HAMP, HAVCR2]
GO:0050727	regulation of inflammatory response	GO_BiologicalProcess-EBI-UniProt-GOA-ACAP-ARAP_05.04.2022_00h00	3.13033e-06	0.00105492	3.07544e-11	8.91878e-10	[4, 5, 6]	Group26	4.16667	16	[ABHD12, ALOX5AP, APOE, CASP4, CCL3, CCR2, CD81, CEBPA, CTSC, GRN, HAMP, IL1B, IL1R1, LGALS2, PYCARD, SERPINE1]
GO:0050729	positive regulation of inflammatory response	GO_BiologicalProcess-EBI-UniProt-GOA-ACAP-ARAP_05.04.2022_00h00	1.0305e-07	3.72009e-05	3.07544e-11	8.91878e-10	[4, 5, 6, 7]	Group26	7.64331	12	[ALOX5AP, CASP4, CCL3, CCR2, CD81, CEBPA, CTSC, GRN, IL1B, LGALS2, PYCARD, SERPINE1]
GO:0042102	positive regulation of T cell proliferation	GO_BiologicalProcess-EBI-UniProt-GOA-ACAP-ARAP_05.04.2022_00h00	1.96604e-05	0.00585879	3.07544e-11	8.91878e-10	[6, 7, 8, 9]	Group26	7.33945	8	[CCR2, CD81, HAVCR2, HLA-A, IGF2, IL1B, LGALS9, PYCARD]
GO:0002687	positive regulation of leukocyte migration	GO_BiologicalProcess-EBI-UniProt-GOA-ACAP-ARAP_05.04.2022_00h00	6.19559e-13	2.44106e-10	2.58408e-16	8.78587e-15	[3, 4, 5, 6, 7, 8]	Group27	10.9677	17	[C5AR1, CCL3, CCR2, CD74, CD99L2, CMKLR1, CSF1R, ICAM1, IL1R1, IL6R, LGALS9, LGMN, MMP14, PYCARD, RAC1, SERPINE1, SWAP70]
GO:0097530	granulocyte migration	GO_BiologicalProcess-EBI-UniProt-GOA-ACAP-ARAP_05.04.2022_00h00	3.36789e-10	1.30337e-07	2.58408e-16	8.78587e-15	[4, 6, 7]	Group27	8.82353	15	[BSG, C5AR1, CCL3, CD74, CD99L2, CMKLR1, CSF1R, FCER1G, IL1B, IL1R1, ITGB2, MPP1, PECAM1, PPIB, RAC1]
GO:0002693	positive regulation of cellular extravasation	GO_BiologicalProcess-EBI-UniProt-GOA-ACAP-ARAP_05.04.2022_00h00	5.00842e-05	0.0139735	2.58408e-16	8.78587e-15	[4, 5, 6, 7, 8, 9]	Group27	20	4	[CCR2, CD99L2, ICAM1, IL1R1]
GO:1902622	regulation of neutrophil migration	GO_BiologicalProcess-EBI-UniProt-GOA-ACAP-ARAP_05.04.2022_00h00	1.50903e-05	0.00455727	2.58408e-16	8.78587e-15	[4, 5, 6, 7, 8, 9]	Group27	11.7647	6	[C5AR1, CD74, CD99L2, IL1R1, MPP1, RAC1]
GO:1990266	neutrophil migration	GO_BiologicalProcess-EBI-UniProt-GOA-ACAP-ARAP_05.04.2022_00h00	2.81888e-09	1.0599e-06	2.58408e-16	8.78587e-15	[5, 7, 8]	Group27	9.28571	13	[BSG, C5AR1, CCL3, CD74, CD99L2, FCER1G, IL1B, IL1R1, ITGB2, MPP1, PECAM1, PPIB, RAC1]
GO:0071622	regulation of granulocyte chemotaxis	GO_BiologicalProcess-EBI-UniProt-GOA-ACAP-ARAP_05.04.2022_00h00	2.60472e-05	0.00757973	2.58408e-16	8.78587e-15	[5, 6, 7, 8, 9]	Group27	10.7143	6	[C5AR1, CD74, CMKLR1, CSF1R, MPP1, RAC1]
GO:1902624	positive regulation of neutrophil migration	GO_BiologicalProcess-EBI-UniProt-GOA-ACAP-ARAP_05.04.2022_00h00	4.02439e-05	0.011389	2.58408e-16	8.78587e-15	[4, 5, 6, 7, 8, 9, 10]	Group27	13.5135	5	[C5AR1, CD74, CD99L2, IL1R1, RAC1]
GO:0032609	interferon-gamma production	GO_BiologicalProcess-EBI-UniProt-GOA-ACAP-ARAP_05.04.2022_00h00	3.94198e-05	0.0111952	1.35591e-09	3.25418e-08	[3, 6]	Group28	6.66667	8	[CCR2, DDIT3, HAVCR2, HLA-A, IL1B, IL1R1, LGALS9, PYCARD]
GO:0032633	interleukin-4 production	GO_BiologicalProcess-EBI-UniProt-GOA-ACAP-ARAP_05.04.2022_00h00	1.94003e-05	0.00580068	1.35591e-09	3.25418e-08	[3, 6]	Group28	15.625	5	[CD83, DDIT3, FCER1G, HAVCR2, LGALS9]
GO:0001818	negative regulation of cytokine production	GO_BiologicalProcess-EBI-UniProt-GOA-ACAP-ARAP_05.04.2022_00h00	6.74081e-05	0.018335	1.35591e-09	3.25418e-08	[3, 4, 5, 6, 7]	Group28	4.08163	12	[APLP2, CD2AP, CD83, CD84, CMKLR1, DDIT3, HAVCR2, IL1R2, LGALS9, MERTK, PYCARD, RAC1]
GO:0002286	T cell activation involved in immune response	GO_BiologicalProcess-EBI-UniProt-GOA-ACAP-ARAP_05.04.2022_00h00	3.94198e-05	0.0111952	1.35591e-09	3.25418e-08	[5, 6]	Group28	6.66667	8	[CD74, CD81, FCER1G, FGL2, HAVCR2, ICAM1, IL6R, LGALS9]
GO:0032649	regulation of interferon-gamma production	GO_BiologicalProcess-EBI-UniProt-GOA-ACAP-ARAP_05.04.2022_00h00	3.94198e-05	0.0111952	1.35591e-09	3.25418e-08	[4, 5, 6, 7]	Group28	6.66667	8	[CCR2, DDIT3, HAVCR2, HLA-A, IL1B, IL1R1, LGALS9, PYCARD]
GO:0032673	regulation of interleukin-4 production	GO_BiologicalProcess-EBI-UniProt-GOA-ACAP-ARAP_05.04.2022_00h00	1.94003e-05	0.00580068	1.35591e-09	3.25418e-08	[4, 5, 6, 7]	Group28	15.625	5	[CD83, DDIT3, FCER1G, HAVCR2, LGALS9]
GO:2001188	regulation of T cell activation via T cell receptor contact with antigen bound to MHC molecule on antigen presenting cell	GO_BiologicalProcess-EBI-UniProt-GOA-ACAP-ARAP_05.04.2022_00h00	2.2287e-05	0.00655237	1.35591e-09	3.25418e-08	[4, 5, 6, 7, 8]	Group28	50	3	[CD81, HAVCR2, LGALS9]
R-HSA:166658	Complement cascade	REACTOME_Pathways_18.08.2022	3.19106e-05	0.00919025	1.57342e-06	2.20279e-05	[-1]	Group29	10.3448	6	[C1QA, C1QB, C1QC, C5AR1, CD81, CFP]
R-HSA:166663	Initial triggering of complement	REACTOME_Pathways_18.08.2022	8.93071e-05	0.0239343	1.57342e-06	2.20279e-05	[-1]	Group29	17.3913	4	[C1QA, C1QB, C1QC, CFP]
R-HSA:173623	Classical antibody-mediated complement activation	REACTOME_Pathways_18.08.2022	2.2287e-05	0.00655237	1.57342e-06	2.20279e-05	[-1]	Group29	50	3	[C1QA, C1QB, C1QC]
R-HSA:977606	Regulation of Complement cascade	REACTOME_Pathways_18.08.2022	9.31605e-06	0.00295319	1.57342e-06	2.20279e-05	[-1]	Group29	12.766	6	[C1QA, C1QB, C1QC, C5AR1, CD81, CFP]
GO:0002285	lymphocyte activation involved in immune response	GO_BiologicalProcess-EBI-UniProt-GOA-ACAP-ARAP_05.04.2022_00h00	9.10163e-05	0.0243013	1.57342e-06	2.20279e-05	[4, 5]	Group29	4.6729	10	[CD74, CD81, FCER1G, FCGR3A, FGL2, HAVCR2, ICAM1, IL6R, LGALS9, SWAP70]
GO:0019724	B cell mediated immunity	GO_BiologicalProcess-EBI-UniProt-GOA-ACAP-ARAP_05.04.2022_00h00	0.000170382	0.0420843	1.57342e-06	2.20279e-05	[5]	Group29	4.329	10	[C1QA, C1QB, C1QC, CD74, CD81, CSF2RB, FCER1G, FCGR3A, SWAP70, TCIRG1]
GO:0016064	immunoglobulin mediated immune response	GO_BiologicalProcess-EBI-UniProt-GOA-ACAP-ARAP_05.04.2022_00h00	0.000153199	0.0381464	1.57342e-06	2.20279e-05	[6]	Group29	4.38596	10	[C1QA, C1QB, C1QC, CD74, CD81, CSF2RB, FCER1G, FCGR3A, SWAP70, TCIRG1]
GO:0098883	synapse pruning	GO_BiologicalProcess-EBI-UniProt-GOA-ACAP-ARAP_05.04.2022_00h00	0.000176864	0.0435086	1.57342e-06	2.20279e-05	[6]	Group29	27.2727	3	[C1QA, C1QB, C1QC]
GO:0032609	interferon-gamma production	GO_BiologicalProcess-EBI-UniProt-GOA-ACAP-ARAP_05.04.2022_00h00	3.94198e-05	0.0111952	2.25834e-09	5.19418e-08	[3, 6]	Group30	6.66667	8	[CCR2, DDIT3, HAVCR2, HLA-A, IL1B, IL1R1, LGALS9, PYCARD]
GO:0002821	positive regulation of adaptive immune response	GO_BiologicalProcess-EBI-UniProt-GOA-ACAP-ARAP_05.04.2022_00h00	3.94198e-05	0.0111952	2.25834e-09	5.19418e-08	[4, 5, 6]	Group30	6.66667	8	[B2M, CCR2, CD81, HLA-A, IL1B, IL1R1, MR1, PYCARD]
GO:0042742	defense response to bacterium	GO_BiologicalProcess-EBI-UniProt-GOA-ACAP-ARAP_05.04.2022_00h00	9.37273e-09	3.5054e-06	2.25834e-09	5.19418e-08	[4, 5, 6]	Group30	4.97512	20	[ANXA3, C5AR1, CASP4, CFP, CYBA, FCER1G, GRN, HAMP, HAVCR2, HLA-A, IL1B, IL6R, LYG1, LYPD8, MPEG1, MR1, PYCARD, RNF213, SERPINE1, STAB1]
GO:0002706	regulation of lymphocyte mediated immunity	GO_BiologicalProcess-EBI-UniProt-GOA-ACAP-ARAP_05.04.2022_00h00	0.000117881	0.0304132	2.25834e-09	5.19418e-08	[5, 6]	Group30	5.02793	9	[B2M, CCR2, CD81, HAVCR2, HLA-A, IL1B, IL1R1, LGALS9, MR1]
GO:0032649	regulation of interferon-gamma production	GO_BiologicalProcess-EBI-UniProt-GOA-ACAP-ARAP_05.04.2022_00h00	3.94198e-05	0.0111952	2.25834e-09	5.19418e-08	[4, 5, 6, 7]	Group30	6.66667	8	[CCR2, DDIT3, HAVCR2, HLA-A, IL1B, IL1R1, LGALS9, PYCARD]
GO:0032729	positive regulation of interferon-gamma production	GO_BiologicalProcess-EBI-UniProt-GOA-ACAP-ARAP_05.04.2022_00h00	2.27974e-05	0.00667963	2.25834e-09	5.19418e-08	[4, 5, 6, 7, 8]	Group30	8.64198	7	[CCR2, HAVCR2, HLA-A, IL1B, IL1R1, LGALS9, PYCARD]
GO:0050830	defense response to Gram-positive bacterium	GO_BiologicalProcess-EBI-UniProt-GOA-ACAP-ARAP_05.04.2022_00h00	4.01066e-06	0.00133154	2.25834e-09	5.19418e-08	[5, 6, 7]	Group30	7.69231	9	[C5AR1, CASP4, HAVCR2, HLA-A, IL1B, LYG1, MPEG1, MR1, PYCARD]
GO:0042129	regulation of T cell proliferation	GO_BiologicalProcess-EBI-UniProt-GOA-ACAP-ARAP_05.04.2022_00h00	0.000157585	0.0390812	2.25834e-09	5.19418e-08	[6, 7, 8]	Group30	4.83871	9	[CCR2, CD81, HAVCR2, HLA-A, IGF2, IL1B, LGALS9, PYCARD, SDC4]
GO:0042102	positive regulation of T cell proliferation	GO_BiologicalProcess-EBI-UniProt-GOA-ACAP-ARAP_05.04.2022_00h00	1.96604e-05	0.00585879	2.25834e-09	5.19418e-08	[6, 7, 8, 9]	Group30	7.33945	8	[CCR2, CD81, HAVCR2, HLA-A, IGF2, IL1B, LGALS9, PYCARD]
GO:0050920	regulation of chemotaxis	GO_BiologicalProcess-EBI-UniProt-GOA-ACAP-ARAP_05.04.2022_00h00	4.9718e-08	1.80973e-05	1.03812e-10	2.90675e-09	[3, 4, 5]	Group31	6.12245	15	[C5AR1, CCL3, CCR2, CD74, CMKLR1, CSF1R, HSPB1, IL6R, LGALS9, LGMN, MPP1, PDGFB, RAC1, SERPINE1, SWAP70]
GO:0032602	chemokine production	GO_BiologicalProcess-EBI-UniProt-GOA-ACAP-ARAP_05.04.2022_00h00	1.12327e-05	0.00348214	1.03812e-10	2.90675e-09	[3, 6]	Group31	7.92079	8	[CD74, CD84, CSF1R, HAVCR2, IL1B, IL6R, LGALS9, PYCARD]
GO:0050921	positive regulation of chemotaxis	GO_BiologicalProcess-EBI-UniProt-GOA-ACAP-ARAP_05.04.2022_00h00	8.99786e-10	3.43718e-07	1.03812e-10	2.90675e-09	[3, 4, 5, 6]	Group31	9.09091	14	[C5AR1, CCL3, CCR2, CD74, CMKLR1, CSF1R, HSPB1, IL6R, LGALS9, LGMN, PDGFB, RAC1, SERPINE1, SWAP70]
GO:0071674	mononuclear cell migration	GO_BiologicalProcess-EBI-UniProt-GOA-ACAP-ARAP_05.04.2022_00h00	8.66273e-09	3.24853e-06	1.03812e-10	2.90675e-09	[3, 5, 6]	Group31	6.97674	15	[C5AR1, CCL3, CCR2, CD99L2, CH25H, CMKLR1, CSF1R, ICAM1, IL6R, LGALS9, LGMN, PDGFB, PECAM1, PYCARD, SERPINE1]
GO:0002687	positive regulation of leukocyte migration	GO_BiologicalProcess-EBI-UniProt-GOA-ACAP-ARAP_05.04.2022_00h00	6.19559e-13	2.44106e-10	1.03812e-10	2.90675e-09	[3, 4, 5, 6, 7, 8]	Group31	10.9677	17	[C5AR1, CCL3, CCR2, CD74, CD99L2, CMKLR1, CSF1R, ICAM1, IL1R1, IL6R, LGALS9, LGMN, MMP14, PYCARD, RAC1, SERPINE1, SWAP70]
GO:0032642	regulation of chemokine production	GO_BiologicalProcess-EBI-UniProt-GOA-ACAP-ARAP_05.04.2022_00h00	1.12327e-05	0.00348214	1.03812e-10	2.90675e-09	[4, 5, 6, 7]	Group31	7.92079	8	[CD74, CD84, CSF1R, HAVCR2, IL1B, IL6R, LGALS9, PYCARD]
GO:0032722	positive regulation of chemokine production	GO_BiologicalProcess-EBI-UniProt-GOA-ACAP-ARAP_05.04.2022_00h00	1.4494e-06	0.000495695	1.03812e-10	2.90675e-09	[4, 5, 6, 7, 8]	Group31	10.3896	8	[CD74, CD84, CSF1R, HAVCR2, IL1B, IL6R, LGALS9, PYCARD]
GO:0071675	regulation of mononuclear cell migration	GO_BiologicalProcess-EBI-UniProt-GOA-ACAP-ARAP_05.04.2022_00h00	8.66732e-07	0.000299889	1.03812e-10	2.90675e-09	[4, 5, 6, 7, 8]	Group31	7.93651	10	[C5AR1, CCL3, CCR2, CD99L2, CMKLR1, CSF1R, LGALS9, LGMN, PYCARD, SERPINE1]
GO:0070374	positive regulation of ERK1 and ERK2 cascade	GO_BiologicalProcess-EBI-UniProt-GOA-ACAP-ARAP_05.04.2022_00h00	3.0253e-05	0.00877338	1.03812e-10	2.90675e-09	[6, 7, 8, 9]	Group31	4.82456	11	[APOE, C5AR1, CCL3, CD74, CSF1R, HAVCR2, ICAM1, LGALS9, MARCO, PDGFB, PYCARD]
R-HSA:6783783	Interleukin-10 signaling	REACTOME_Pathways_18.08.2022	5.57028e-07	0.000195517	2.97883e-10	8.04285e-09	[-1]	Group32	14.8936	7	[CCL3, CCR2, ICAM1, IL10RA, IL1B, IL1R1, IL1R2]
GO:0002367	cytokine production involved in immune response	GO_BiologicalProcess-EBI-UniProt-GOA-ACAP-ARAP_05.04.2022_00h00	0.00018073	0.0442788	2.97883e-10	8.04285e-09	[3, 6]	Group32	6.25	7	[B2M, CCR2, CD74, CD81, HLA-A, IL1B, IL1R1]
GO:0002456	T cell mediated immunity	GO_BiologicalProcess-EBI-UniProt-GOA-ACAP-ARAP_05.04.2022_00h00	5.956e-07	0.00020846	2.97883e-10	8.04285e-09	[5]	Group32	8.26446	10	[B2M, CCR2, CD81, CTSC, CTSH, HLA-A, ICAM1, IL1B, IL1R1, MR1]
GO:0002718	regulation of cytokine production involved in immune response	GO_BiologicalProcess-EBI-UniProt-GOA-ACAP-ARAP_05.04.2022_00h00	0.00018073	0.0442788	2.97883e-10	8.04285e-09	[4, 5, 6, 7]	Group32	6.25	7	[B2M, CCR2, CD74, CD81, HLA-A, IL1B, IL1R1]
GO:0002369	T cell cytokine production	GO_BiologicalProcess-EBI-UniProt-GOA-ACAP-ARAP_05.04.2022_00h00	4.75401e-06	0.00154505	2.97883e-10	8.04285e-09	[4, 6, 7]	Group32	14.2857	6	[B2M, CCR2, CD81, HLA-A, IL1B, IL1R1]
GO:0002824	positive regulation of adaptive immune response based on somatic recombination of immune receptors built from immunoglobulin superfamily domains	GO_BiologicalProcess-EBI-UniProt-GOA-ACAP-ARAP_05.04.2022_00h00	0.000201689	0.0488088	2.97883e-10	8.04285e-09	[5, 6, 7]	Group32	6.14035	7	[B2M, CCR2, CD81, HLA-A, IL1B, IL1R1, MR1]
GO:0004896	cytokine receptor activity	GO_BiologicalProcess-EBI-UniProt-GOA-ACAP-ARAP_05.04.2022_00h00	1.07666e-06	0.000371447	2.97883e-10	8.04285e-09	[5, 6, 7]	Group32	9	9	[CCR2, CD74, CMKLR1, CSF2RB, CXCR3, IL10RA, IL1R1, IL1R2, IL6R]
GO:0032729	positive regulation of interferon-gamma production	GO_BiologicalProcess-EBI-UniProt-GOA-ACAP-ARAP_05.04.2022_00h00	2.27974e-05	0.00667963	2.97883e-10	8.04285e-09	[4, 5, 6, 7, 8]	Group32	8.64198	7	[CCR2, HAVCR2, HLA-A, IL1B, IL1R1, LGALS9, PYCARD]
GO:0002693	positive regulation of cellular extravasation	GO_BiologicalProcess-EBI-UniProt-GOA-ACAP-ARAP_05.04.2022_00h00	5.00842e-05	0.0139735	2.97883e-10	8.04285e-09	[4, 5, 6, 7, 8, 9]	Group32	20	4	[CCR2, CD99L2, ICAM1, IL1R1]
GO:0002709	regulation of T cell mediated immunity	GO_BiologicalProcess-EBI-UniProt-GOA-ACAP-ARAP_05.04.2022_00h00	4.85835e-05	0.0136034	2.97883e-10	8.04285e-09	[6, 7]	Group32	7.69231	7	[B2M, CCR2, CD81, HLA-A, IL1B, IL1R1, MR1]
GO:0002724	regulation of T cell cytokine production	GO_BiologicalProcess-EBI-UniProt-GOA-ACAP-ARAP_05.04.2022_00h00	4.75401e-06	0.00154505	2.97883e-10	8.04285e-09	[5, 6, 7, 8]	Group32	14.2857	6	[B2M, CCR2, CD81, HLA-A, IL1B, IL1R1]
R-HSA:77387	Insulin receptor recycling	REACTOME_Pathways_18.08.2022	0.000147109	0.0367773	4.53844e-07	6.80766e-06	[-1]	Group33	15.3846	4	[ATP6AP1, ATP6V0B, ATP6V0C, TCIRG1]
R-HSA:983712	Ion channel transport	REACTOME_Pathways_18.08.2022	0.000157585	0.0390812	4.53844e-07	6.80766e-06	[-1]	Group33	4.83871	9	[ATP1B1, ATP6AP1, ATP6V0B, ATP6V0C, CLIC2, SGK1, STOML3, TCIRG1, TTYH3]
GO:0051452	intracellular pH reduction	GO_BiologicalProcess-EBI-UniProt-GOA-ACAP-ARAP_05.04.2022_00h00	1.69107e-05	0.00509013	4.53844e-07	6.80766e-06	[9, 11]	Group33	11.5385	6	[ATP6AP1, ATP6V0B, ATP6V0C, GRN, RNASEK, TCIRG1]
GO:0007035	vacuolar acidification	GO_BiologicalProcess-EBI-UniProt-GOA-ACAP-ARAP_05.04.2022_00h00	7.34471e-07	0.000255596	4.53844e-07	6.80766e-06	[10, 12]	Group33	19.3548	6	[ATP6AP1, ATP6V0B, ATP6V0C, GRN, RNASEK, TCIRG1]
GO:0007042	lysosomal lumen acidification	GO_BiologicalProcess-EBI-UniProt-GOA-ACAP-ARAP_05.04.2022_00h00	5.90735e-08	2.14437e-05	4.53844e-07	6.80766e-06	[9, 10, 11, 12, 13]	Group33	28.5714	6	[ATP6AP1, ATP6V0B, ATP6V0C, GRN, RNASEK, TCIRG1]
GO:0061795	Golgi lumen acidification	GO_BiologicalProcess-EBI-UniProt-GOA-ACAP-ARAP_05.04.2022_00h00	5.46537e-06	0.00176532	4.53844e-07	6.80766e-06	[10, 12]	Group33	33.3333	4	[ATP6AP1, ATP6V0B, ATP6V0C, RNASEK]
GO:0007033	vacuole organization	GO_BiologicalProcess-EBI-UniProt-GOA-ACAP-ARAP_05.04.2022_00h00	0.000102123	0.0268583	4.53844e-07	6.80766e-06	[5]	Group33	4.60829	10	[ABCA1, ATP6AP1, ATP6V0B, ATP6V0C, GRN, HEXB, RNASEK, SCARB2, TCIRG1, VMP1]
GO:0022853	active ion transmembrane transporter activity	GO_BiologicalProcess-EBI-UniProt-GOA-ACAP-ARAP_05.04.2022_00h00	3.62591e-06	0.00121468	4.53844e-07	6.80766e-06	[5, 7]	Group33	4.66667	14	[ABCC5, ATP1B1, ATP6V0B, ATP6V0C, BSG, SLC1A3, SLC20A1, SLC22A4, SLC3A2, SLC45A4, SLC9A1, SLCO2B1, TCIRG1, VMP1]
GO:0080171	lytic vacuole organization	GO_BiologicalProcess-EBI-UniProt-GOA-ACAP-ARAP_05.04.2022_00h00	1.07666e-06	0.000371447	4.53844e-07	6.80766e-06	[6]	Group33	9	9	[ABCA1, ATP6AP1, ATP6V0B, ATP6V0C, GRN, HEXB, RNASEK, SCARB2, TCIRG1]
GO:0007040	lysosome organization	GO_BiologicalProcess-EBI-UniProt-GOA-ACAP-ARAP_05.04.2022_00h00	1.07666e-06	0.000371447	4.53844e-07	6.80766e-06	[7]	Group33	9	9	[ABCA1, ATP6AP1, ATP6V0B, ATP6V0C, GRN, HEXB, RNASEK, SCARB2, TCIRG1]
GO:0030004	cellular monovalent inorganic cation homeostasis	GO_BiologicalProcess-EBI-UniProt-GOA-ACAP-ARAP_05.04.2022_00h00	4.3029e-06	0.00141565	4.53844e-07	6.80766e-06	[6, 8]	Group33	7.62712	9	[ATP1B1, ATP6AP1, ATP6V0B, ATP6V0C, GRN, RNASEK, SLC1A3, SLC9A1, TCIRG1]
GO:0055067	monovalent inorganic cation homeostasis	GO_BiologicalProcess-EBI-UniProt-GOA-ACAP-ARAP_05.04.2022_00h00	7.5922e-05	0.020423	4.53844e-07	6.80766e-06	[7]	Group33	5.32544	9	[ATP1B1, ATP6AP1, ATP6V0B, ATP6V0C, GRN, RNASEK, SLC1A3, SLC9A1, TCIRG1]
GO:0006885	regulation of pH	GO_BiologicalProcess-EBI-UniProt-GOA-ACAP-ARAP_05.04.2022_00h00	0.000100604	0.0266599	4.53844e-07	6.80766e-06	[8]	Group33	6.86275	7	[ATP6AP1, ATP6V0B, ATP6V0C, GRN, RNASEK, SLC9A1, TCIRG1]
GO:0030641	regulation of cellular pH	GO_BiologicalProcess-EBI-UniProt-GOA-ACAP-ARAP_05.04.2022_00h00	5.21227e-05	0.0144901	4.53844e-07	6.80766e-06	[7, 9]	Group33	7.6087	7	[ATP6AP1, ATP6V0B, ATP6V0C, GRN, RNASEK, SLC9A1, TCIRG1]
GO:0048388	endosomal lumen acidification	GO_BiologicalProcess-EBI-UniProt-GOA-ACAP-ARAP_05.04.2022_00h00	1.08715e-05	0.00339191	4.53844e-07	6.80766e-06	[6, 7, 10, 12]	Group33	28.5714	4	[ATP6AP1, ATP6V0B, ATP6V0C, RNASEK]
GO:0051453	regulation of intracellular pH	GO_BiologicalProcess-EBI-UniProt-GOA-ACAP-ARAP_05.04.2022_00h00	3.37067e-05	0.00964013	4.53844e-07	6.80766e-06	[8, 10]	Group33	8.13953	7	[ATP6AP1, ATP6V0B, ATP6V0C, GRN, RNASEK, SLC9A1, TCIRG1]
GO:0035751	regulation of lysosomal lumen pH	GO_BiologicalProcess-EBI-UniProt-GOA-ACAP-ARAP_05.04.2022_00h00	2.39917e-07	8.54105e-05	4.53844e-07	6.80766e-06	[8, 9, 11]	Group33	23.0769	6	[ATP6AP1, ATP6V0B, ATP6V0C, GRN, RNASEK, TCIRG1]
GO:0050920	regulation of chemotaxis	GO_BiologicalProcess-EBI-UniProt-GOA-ACAP-ARAP_05.04.2022_00h00	4.9718e-08	1.80973e-05	7.72704e-17	2.70446e-15	[3, 4, 5]	Group34	6.12245	15	[C5AR1, CCL3, CCR2, CD74, CMKLR1, CSF1R, HSPB1, IL6R, LGALS9, LGMN, MPP1, PDGFB, RAC1, SERPINE1, SWAP70]
GO:0002275	myeloid cell activation involved in immune response	GO_BiologicalProcess-EBI-UniProt-GOA-ACAP-ARAP_05.04.2022_00h00	1.8779e-07	6.70412e-05	7.72704e-17	2.70446e-15	[4, 5]	Group34	9.34579	10	[ANXA3, CCL3, CCR2, CD84, FCER1G, GRN, HAVCR2, ITGB2, LGALS9, PYCARD]
GO:0050921	positive regulation of chemotaxis	GO_BiologicalProcess-EBI-UniProt-GOA-ACAP-ARAP_05.04.2022_00h00	8.99786e-10	3.43718e-07	7.72704e-17	2.70446e-15	[3, 4, 5, 6]	Group34	9.09091	14	[C5AR1, CCL3, CCR2, CD74, CMKLR1, CSF1R, HSPB1, IL6R, LGALS9, LGMN, PDGFB, RAC1, SERPINE1, SWAP70]
GO:0071706	tumor necrosis factor superfamily cytokine production	GO_BiologicalProcess-EBI-UniProt-GOA-ACAP-ARAP_05.04.2022_00h00	0.000133724	0.0338322	7.72704e-17	2.70446e-15	[3, 6]	Group34	4.94506	9	[CCL3, CCR2, CD84, CYBA, FCGR3A, HAVCR2, HSPB1, LGALS9, PYCARD]
GO:0071674	mononuclear cell migration	GO_BiologicalProcess-EBI-UniProt-GOA-ACAP-ARAP_05.04.2022_00h00	8.66273e-09	3.24853e-06	7.72704e-17	2.70446e-15	[3, 5, 6]	Group34	6.97674	15	[C5AR1, CCL3, CCR2, CD99L2, CH25H, CMKLR1, CSF1R, ICAM1, IL6R, LGALS9, LGMN, PDGFB, PECAM1, PYCARD, SERPINE1]
GO:0002685	regulation of leukocyte migration	GO_BiologicalProcess-EBI-UniProt-GOA-ACAP-ARAP_05.04.2022_00h00	1.05393e-13	4.17356e-11	7.72704e-17	2.70446e-15	[3, 4, 5, 6, 7]	Group34	8.71369	21	[C5AR1, CCL3, CCR2, CD74, CD81, CD9, CD99L2, CMKLR1, CSF1R, CXCR3, ICAM1, IL1R1, IL6R, LGALS9, LGMN, MMP14, MPP1, PYCARD, RAC1, SERPINE1, SWAP70]
GO:0043299	leukocyte degranulation	GO_BiologicalProcess-EBI-UniProt-GOA-ACAP-ARAP_05.04.2022_00h00	4.20943e-05	0.0118706	7.72704e-17	2.70446e-15	[3, 4, 6, 7, 8]	Group34	7.86517	7	[ANXA3, CCL3, CCR2, CD84, FCGR3A, ITGB2, LGALS9]
GO:0002687	positive regulation of leukocyte migration	GO_BiologicalProcess-EBI-UniProt-GOA-ACAP-ARAP_05.04.2022_00h00	6.19559e-13	2.44106e-10	7.72704e-17	2.70446e-15	[3, 4, 5, 6, 7, 8]	Group34	10.9677	17	[C5AR1, CCL3, CCR2, CD74, CD99L2, CMKLR1, CSF1R, ICAM1, IL1R1, IL6R, LGALS9, LGMN, MMP14, PYCARD, RAC1, SERPINE1, SWAP70]
GO:0032640	tumor necrosis factor production	GO_BiologicalProcess-EBI-UniProt-GOA-ACAP-ARAP_05.04.2022_00h00	0.00010364	0.0271537	7.72704e-17	2.70446e-15	[4, 7]	Group34	5.11364	9	[CCL3, CCR2, CD84, CYBA, FCGR3A, HAVCR2, HSPB1, LGALS9, PYCARD]
GO:1903555	regulation of tumor necrosis factor superfamily cytokine production	GO_BiologicalProcess-EBI-UniProt-GOA-ACAP-ARAP_05.04.2022_00h00	0.000133724	0.0338322	7.72704e-17	2.70446e-15	[4, 5, 6, 7]	Group34	4.94506	9	[CCL3, CCR2, CD84, CYBA, FCGR3A, HAVCR2, HSPB1, LGALS9, PYCARD]
GO:0002548	monocyte chemotaxis	GO_BiologicalProcess-EBI-UniProt-GOA-ACAP-ARAP_05.04.2022_00h00	0.000127101	0.0324108	7.72704e-17	2.70446e-15	[4, 6, 7]	Group34	8.10811	6	[CCL3, CCR2, IL6R, LGMN, PDGFB, SERPINE1]
GO:0002688	regulation of leukocyte chemotaxis	GO_BiologicalProcess-EBI-UniProt-GOA-ACAP-ARAP_05.04.2022_00h00	2.58061e-09	9.7547e-07	7.72704e-17	2.70446e-15	[4, 5, 6, 7, 8]	Group34	9.35252	13	[C5AR1, CCL3, CCR2, CD74, CMKLR1, CSF1R, IL6R, LGALS9, LGMN, MPP1, RAC1, SERPINE1, SWAP70]
GO:0032729	positive regulation of interferon-gamma production	GO_BiologicalProcess-EBI-UniProt-GOA-ACAP-ARAP_05.04.2022_00h00	2.27974e-05	0.00667963	7.72704e-17	2.70446e-15	[4, 5, 6, 7, 8]	Group34	8.64198	7	[CCR2, HAVCR2, HLA-A, IL1B, IL1R1, LGALS9, PYCARD]
GO:0032757	positive regulation of interleukin-8 production	GO_BiologicalProcess-EBI-UniProt-GOA-ACAP-ARAP_05.04.2022_00h00	0.000100854	0.0266256	7.72704e-17	2.70446e-15	[4, 5, 6, 7, 8]	Group34	8.4507	6	[CD74, DDIT3, IL1B, LGALS9, PYCARD, SERPINE1]
GO:0071675	regulation of mononuclear cell migration	GO_BiologicalProcess-EBI-UniProt-GOA-ACAP-ARAP_05.04.2022_00h00	8.66732e-07	0.000299889	7.72704e-17	2.70446e-15	[4, 5, 6, 7, 8]	Group34	7.93651	10	[C5AR1, CCL3, CCR2, CD99L2, CMKLR1, CSF1R, LGALS9, LGMN, PYCARD, SERPINE1]
GO:1903557	positive regulation of tumor necrosis factor superfamily cytokine production	GO_BiologicalProcess-EBI-UniProt-GOA-ACAP-ARAP_05.04.2022_00h00	3.73564e-06	0.00124397	7.72704e-17	2.70446e-15	[4, 5, 6, 7, 8]	Group34	7.75862	9	[CCL3, CCR2, CD84, CYBA, FCGR3A, HAVCR2, HSPB1, LGALS9, PYCARD]
GO:0002690	positive regulation of leukocyte chemotaxis	GO_BiologicalProcess-EBI-UniProt-GOA-ACAP-ARAP_05.04.2022_00h00	7.55889e-10	2.89506e-07	7.72704e-17	2.70446e-15	[4, 5, 6, 7, 8, 9]	Group34	11.7647	12	[C5AR1, CCL3, CCR2, CD74, CMKLR1, CSF1R, IL6R, LGALS9, LGMN, RAC1, SERPINE1, SWAP70]
GO:0031638	zymogen activation	GO_BiologicalProcess-EBI-UniProt-GOA-ACAP-ARAP_05.04.2022_00h00	9.52444e-06	0.0030002	7.72704e-17	2.70446e-15	[6, 7]	Group34	9.85915	7	[CTSH, CTSL, CTSZ, LGMN, MMP14, PYCARD, SERPINE1]
GO:0032680	regulation of tumor necrosis factor production	GO_BiologicalProcess-EBI-UniProt-GOA-ACAP-ARAP_05.04.2022_00h00	0.00010364	0.0271537	7.72704e-17	2.70446e-15	[5, 6, 7, 8]	Group34	5.11364	9	[CCL3, CCR2, CD84, CYBA, FCGR3A, HAVCR2, HSPB1, LGALS9, PYCARD]
GO:0071677	positive regulation of mononuclear cell migration	GO_BiologicalProcess-EBI-UniProt-GOA-ACAP-ARAP_05.04.2022_00h00	1.2551e-05	0.00385316	7.72704e-17	2.70446e-15	[4, 5, 6, 7, 8, 9]	Group34	9.45946	7	[CCL3, CCR2, CD99L2, LGALS9, LGMN, PYCARD, SERPINE1]
GO:0032760	positive regulation of tumor necrosis factor production	GO_BiologicalProcess-EBI-UniProt-GOA-ACAP-ARAP_05.04.2022_00h00	2.79116e-06	0.000946204	7.72704e-17	2.70446e-15	[5, 6, 7, 8, 9]	Group34	8.03571	9	[CCL3, CCR2, CD84, CYBA, FCGR3A, HAVCR2, HSPB1, LGALS9, PYCARD]
GO:0002269	leukocyte activation involved in inflammatory response	GO_BiologicalProcess-EBI-UniProt-GOA-ACAP-ARAP_05.04.2022_00h00	1.1923e-05	0.00367229	8.08214e-16	2.66711e-14	[3, 4, 5]	Group35	12.2449	6	[C1QA, C5AR1, CCL3, CTSC, GRN, ITGB2]
GO:0050867	positive regulation of cell activation	GO_BiologicalProcess-EBI-UniProt-GOA-ACAP-ARAP_05.04.2022_00h00	1.1381e-08	4.24511e-06	8.08214e-16	2.66711e-14	[3, 4, 5]	Group35	4.47154	22	[B2M, CCL3, CCR2, CD74, CD81, CD83, CEBPA, CTSC, FCGR3A, HAMP, HAVCR1, HAVCR2, HLA-A, HLA-DOA, HLA-DOB, IGF2, IL1B, ITGB2, LGALS9, MMP14, PLEK, PYCARD]
GO:0002275	myeloid cell activation involved in immune response	GO_BiologicalProcess-EBI-UniProt-GOA-ACAP-ARAP_05.04.2022_00h00	1.8779e-07	6.70412e-05	8.08214e-16	2.66711e-14	[4, 5]	Group35	9.34579	10	[ANXA3, CCL3, CCR2, CD84, FCER1G, GRN, HAVCR2, ITGB2, LGALS9, PYCARD]
GO:0002696	positive regulation of leukocyte activation	GO_BiologicalProcess-EBI-UniProt-GOA-ACAP-ARAP_05.04.2022_00h00	2.83402e-08	1.04292e-05	8.08214e-16	2.66711e-14	[3, 4, 5, 6]	Group35	4.43975	21	[B2M, CCL3, CCR2, CD74, CD81, CD83, CEBPA, CTSC, FCGR3A, HAMP, HAVCR1, HAVCR2, HLA-A, HLA-DOA, HLA-DOB, IGF2, IL1B, ITGB2, LGALS9, MMP14, PYCARD]
GO:0031349	positive regulation of defense response	GO_BiologicalProcess-EBI-UniProt-GOA-ACAP-ARAP_05.04.2022_00h00	7.07809e-06	0.00225791	8.08214e-16	2.66711e-14	[3, 4, 5, 6]	Group35	4.40252	14	[ALOX5AP, CASP4, CCL3, CCR2, CD81, CEBPA, CTSC, CYBA, GRN, HAVCR2, IL1B, LGALS2, PYCARD, SERPINE1]
GO:0036230	granulocyte activation	GO_BiologicalProcess-EBI-UniProt-GOA-ACAP-ARAP_05.04.2022_00h00	1.34314e-05	0.00409658	8.08214e-16	2.66711e-14	[4, 5]	Group35	12	6	[ANXA3, CCL3, CCR2, FCER1G, GRN, ITGB2]
GO:0042116	macrophage activation	GO_BiologicalProcess-EBI-UniProt-GOA-ACAP-ARAP_05.04.2022_00h00	2.03245e-09	7.7233e-07	8.08214e-16	2.66711e-14	[4, 5]	Group35	10.8108	12	[C1QA, C5AR1, CCL3, CD74, CD84, CEBPA, CTSC, FCGR3A, GRN, HAMP, HAVCR2, ITGB2]
GO:0061900	glial cell activation	GO_BiologicalProcess-EBI-UniProt-GOA-ACAP-ARAP_05.04.2022_00h00	8.80603e-08	3.18778e-05	8.08214e-16	2.66711e-14	[3, 6]	Group35	14.8148	8	[C1QA, C5AR1, CCL3, CTSC, GRN, IL1B, ITGB2, SMOX]
GO:0010631	epithelial cell migration	GO_BiologicalProcess-EBI-UniProt-GOA-ACAP-ARAP_05.04.2022_00h00	3.18655e-05	0.00920912	8.08214e-16	2.66711e-14	[4, 5, 6]	Group35	4.10095	13	[ANXA3, APOE, CTSH, DNAJA4, GLUL, GRN, HBEGF, HSPB1, LGMN, PDGFB, PRCP, RAC1, TNFSF12]
GO:0010632	regulation of epithelial cell migration	GO_BiologicalProcess-EBI-UniProt-GOA-ACAP-ARAP_05.04.2022_00h00	9.55403e-06	0.00299996	8.08214e-16	2.66711e-14	[3, 4, 5, 6, 7]	Group35	4.97925	12	[ANXA3, APOE, CTSH, DNAJA4, GLUL, GRN, HBEGF, HSPB1, LGMN, PDGFB, PRCP, RAC1]
GO:0043030	regulation of macrophage activation	GO_BiologicalProcess-EBI-UniProt-GOA-ACAP-ARAP_05.04.2022_00h00	3.87095e-07	0.000136257	8.08214e-16	2.66711e-14	[4, 5, 6]	Group35	12.3077	8	[CCL3, CD74, CD84, CEBPA, CTSC, GRN, HAMP, HAVCR2]
GO:0150076	neuroinflammatory response	GO_BiologicalProcess-EBI-UniProt-GOA-ACAP-ARAP_05.04.2022_00h00	6.92303e-07	0.000241614	8.08214e-16	2.66711e-14	[5]	Group35	11.4286	8	[C1QA, C5AR1, CCL3, CTSC, GRN, IL1B, ITGB2, SMOX]
GO:0043299	leukocyte degranulation	GO_BiologicalProcess-EBI-UniProt-GOA-ACAP-ARAP_05.04.2022_00h00	4.20943e-05	0.0118706	8.08214e-16	2.66711e-14	[3, 4, 6, 7, 8]	Group35	7.86517	7	[ANXA3, CCL3, CCR2, CD84, FCGR3A, ITGB2, LGALS9]
GO:0001774	microglial cell activation	GO_BiologicalProcess-EBI-UniProt-GOA-ACAP-ARAP_05.04.2022_00h00	8.19788e-06	0.00260693	8.08214e-16	2.66711e-14	[4, 5, 6, 7]	Group35	13.0435	6	[C1QA, C5AR1, CCL3, CTSC, GRN, ITGB2]
GO:0043032	positive regulation of macrophage activation	GO_BiologicalProcess-EBI-UniProt-GOA-ACAP-ARAP_05.04.2022_00h00	1.39647e-05	0.00424527	8.08214e-16	2.66711e-14	[4, 5, 6, 7]	Group35	16.6667	5	[CCL3, CEBPA, CTSC, HAMP, HAVCR2]
GO:1904018	positive regulation of vasculature development	GO_BiologicalProcess-EBI-UniProt-GOA-ACAP-ARAP_05.04.2022_00h00	0.000122977	0.0316051	8.08214e-16	2.66711e-14	[3, 4, 5, 6, 7, 8]	Group35	5	9	[ANXA3, C5AR1, CTSH, GRN, HSPB1, IL1B, ITGAX, SERPINE1, TNFSF12]
GO:0010594	regulation of endothelial cell migration	GO_BiologicalProcess-EBI-UniProt-GOA-ACAP-ARAP_05.04.2022_00h00	2.20804e-05	0.00651372	8.08214e-16	2.66711e-14	[4, 5, 6, 7, 8]	Group35	5.52486	10	[ANXA3, APOE, DNAJA4, GLUL, GRN, HSPB1, LGMN, PDGFB, PRCP, RAC1]
GO:0043542	endothelial cell migration	GO_BiologicalProcess-EBI-UniProt-GOA-ACAP-ARAP_05.04.2022_00h00	4.30882e-05	0.0121078	8.08214e-16	2.66711e-14	[5, 6, 7]	Group35	4.64135	11	[ANXA3, APOE, DNAJA4, GLUL, GRN, HSPB1, LGMN, PDGFB, PRCP, RAC1, TNFSF12]
GO:0030593	neutrophil chemotaxis	GO_BiologicalProcess-EBI-UniProt-GOA-ACAP-ARAP_05.04.2022_00h00	3.70503e-07	0.000130788	8.08214e-16	2.66711e-14	[5, 6, 7, 8, 9]	Group35	8.69565	10	[BSG, C5AR1, CCL3, CD74, FCER1G, IL1B, ITGB2, MPP1, PPIB, RAC1]
GO:0014002	astrocyte development	GO_BiologicalProcess-EBI-UniProt-GOA-ACAP-ARAP_05.04.2022_00h00	0.000105383	0.0275049	8.08214e-16	2.66711e-14	[5, 6, 7, 8, 9, 10]	Group35	11.1111	5	[C1QA, C5AR1, GRN, IL1B, SMOX]
GO:0045766	positive regulation of angiogenesis	GO_BiologicalProcess-EBI-UniProt-GOA-ACAP-ARAP_05.04.2022_00h00	0.000122977	0.0316051	8.08214e-16	2.66711e-14	[4, 5, 6, 7, 8, 9, 10, 11]	Group35	5	9	[ANXA3, C5AR1, CTSH, GRN, HSPB1, IL1B, ITGAX, SERPINE1, TNFSF12]
GO:0048143	astrocyte activation	GO_BiologicalProcess-EBI-UniProt-GOA-ACAP-ARAP_05.04.2022_00h00	3.50019e-06	0.00117606	8.08214e-16	2.66711e-14	[4, 6, 7, 8, 9, 10, 11]	Group35	21.7391	5	[C1QA, C5AR1, GRN, IL1B, SMOX]
R-HSA:202733	Cell surface interactions at the vascular wall	REACTOME_Pathways_18.08.2022	2.15798e-09	8.17876e-07	1.29286e-19	4.6543e-18	[-1]	Group36	9.48905	13	[ATP1B1, BSG, CD74, CD84, CD99L2, FCER1G, ITGAX, ITGB2, MERTK, PECAM1, SDC4, SLC3A2, SLC7A7]
GO:0050900	leukocyte migration	GO_BiologicalProcess-EBI-UniProt-GOA-ACAP-ARAP_05.04.2022_00h00	6.5871e-16	2.62167e-13	1.29286e-19	4.6543e-18	[2, 4, 5]	Group36	6.9378	29	[BSG, C5AR1, CCL3, CCR2, CD74, CD81, CD9, CD99L2, CH25H, CMKLR1, CSF1R, CXCR3, FCER1G, ICAM1, IL1B, IL1R1, IL6R, ITGB2, LGALS9, LGMN, MMP14, MPP1, PDGFB, PECAM1, PPIB, PYCARD, RAC1, SERPINE1, SWAP70]
GO:0032103	positive regulation of response to external stimulus	GO_BiologicalProcess-EBI-UniProt-GOA-ACAP-ARAP_05.04.2022_00h00	3.76044e-11	1.45905e-08	1.29286e-19	4.6543e-18	[3, 4, 5]	Group36	5.24109	25	[ALOX5AP, C5AR1, CASP4, CCL3, CCR2, CD74, CD81, CEBPA, CMKLR1, CSF1R, CTSC, CYBA, GRN, HAVCR2, HSPB1, IL1B, IL6R, LGALS2, LGALS9, LGMN, PDGFB, PYCARD, RAC1, SERPINE1, SWAP70]
GO:0050920	regulation of chemotaxis	GO_BiologicalProcess-EBI-UniProt-GOA-ACAP-ARAP_05.04.2022_00h00	4.9718e-08	1.80973e-05	1.29286e-19	4.6543e-18	[3, 4, 5]	Group36	6.12245	15	[C5AR1, CCL3, CCR2, CD74, CMKLR1, CSF1R, HSPB1, IL6R, LGALS9, LGMN, MPP1, PDGFB, RAC1, SERPINE1, SWAP70]
GO:0051272	positive regulation of cellular component movement	GO_BiologicalProcess-EBI-UniProt-GOA-ACAP-ARAP_05.04.2022_00h00	5.64525e-12	2.196e-09	1.29286e-19	4.6543e-18	[3, 4, 5]	Group36	4.85762	29	[ANXA3, C5AR1, CCL3, CCR2, CD74, CD99L2, CMKLR1, CSF1R, CTSH, GRN, HBEGF, HSPA5, HSPB1, ICAM1, IL1B, IL1R1, IL6R, ITGAX, LGALS9, LGMN, MCAM, MMP14, PDGFB, PECAM1, PYCARD, RAC1, SERPINE1, SMOX, SWAP70]
GO:0031349	positive regulation of defense response	GO_BiologicalProcess-EBI-UniProt-GOA-ACAP-ARAP_05.04.2022_00h00	7.07809e-06	0.00225791	1.29286e-19	4.6543e-18	[3, 4, 5, 6]	Group36	4.40252	14	[ALOX5AP, CASP4, CCL3, CCR2, CD81, CEBPA, CTSC, CYBA, GRN, HAVCR2, IL1B, LGALS2, PYCARD, SERPINE1]
GO:0050921	positive regulation of chemotaxis	GO_BiologicalProcess-EBI-UniProt-GOA-ACAP-ARAP_05.04.2022_00h00	8.99786e-10	3.43718e-07	1.29286e-19	4.6543e-18	[3, 4, 5, 6]	Group36	9.09091	14	[C5AR1, CCL3, CCR2, CD74, CMKLR1, CSF1R, HSPB1, IL6R, LGALS9, LGMN, PDGFB, RAC1, SERPINE1, SWAP70]
GO:0060326	cell chemotaxis	GO_BiologicalProcess-EBI-UniProt-GOA-ACAP-ARAP_05.04.2022_00h00	1.58479e-12	6.21239e-10	1.29286e-19	4.6543e-18	[4, 5]	Group36	6.72515	23	[BSG, C5AR1, CCL3, CCR2, CD74, CH25H, CMKLR1, CSF1R, CXCR3, FCER1G, HBEGF, HSPB1, IL1B, IL6R, ITGB2, LGALS9, LGMN, MPP1, PDGFB, PPIB, RAC1, SERPINE1, SWAP70]
GO:0061900	glial cell activation	GO_BiologicalProcess-EBI-UniProt-GOA-ACAP-ARAP_05.04.2022_00h00	8.80603e-08	3.18778e-05	1.29286e-19	4.6543e-18	[3, 6]	Group36	14.8148	8	[C1QA, C5AR1, CCL3, CTSC, GRN, IL1B, ITGB2, SMOX]
GO:2000147	positive regulation of cell motility	GO_BiologicalProcess-EBI-UniProt-GOA-ACAP-ARAP_05.04.2022_00h00	2.90273e-12	1.13497e-09	1.29286e-19	4.6543e-18	[3, 4, 5, 6]	Group36	4.99139	29	[ANXA3, C5AR1, CCL3, CCR2, CD74, CD99L2, CMKLR1, CSF1R, CTSH, GRN, HBEGF, HSPA5, HSPB1, ICAM1, IL1B, IL1R1, IL6R, ITGAX, LGALS9, LGMN, MCAM, MMP14, PDGFB, PECAM1, PYCARD, RAC1, SERPINE1, SMOX, SWAP70]
GO:0030595	leukocyte chemotaxis	GO_BiologicalProcess-EBI-UniProt-GOA-ACAP-ARAP_05.04.2022_00h00	4.27103e-12	1.6657e-09	1.29286e-19	4.6543e-18	[3, 5, 6]	Group36	7.69231	20	[BSG, C5AR1, CCL3, CCR2, CD74, CH25H, CMKLR1, CSF1R, FCER1G, IL1B, IL6R, ITGB2, LGALS9, LGMN, MPP1, PDGFB, PPIB, RAC1, SERPINE1, SWAP70]
GO:0071674	mononuclear cell migration	GO_BiologicalProcess-EBI-UniProt-GOA-ACAP-ARAP_05.04.2022_00h00	8.66273e-09	3.24853e-06	1.29286e-19	4.6543e-18	[3, 5, 6]	Group36	6.97674	15	[C5AR1, CCL3, CCR2, CD99L2, CH25H, CMKLR1, CSF1R, ICAM1, IL6R, LGALS9, LGMN, PDGFB, PECAM1, PYCARD, SERPINE1]
GO:0097529	myeloid leukocyte migration	GO_BiologicalProcess-EBI-UniProt-GOA-ACAP-ARAP_05.04.2022_00h00	2.15619e-16	8.60322e-14	1.29286e-19	4.6543e-18	[3, 5, 6]	Group36	9.52381	24	[BSG, C5AR1, CCL3, CCR2, CD74, CD81, CD9, CD99L2, CMKLR1, CSF1R, FCER1G, IL1B, IL1R1, IL6R, ITGB2, LGMN, MMP14, MPP1, PDGFB, PECAM1, PPIB, RAC1, SERPINE1, SWAP70]
GO:0001819	positive regulation of cytokine production	GO_BiologicalProcess-EBI-UniProt-GOA-ACAP-ARAP_05.04.2022_00h00	2.32377e-08	8.59796e-06	1.29286e-19	4.6543e-18	[3, 4, 5, 6, 7]	Group36	4.29688	22	[B2M, C5AR1, CCL3, CCR2, CD74, CD81, CD83, CD84, CSF1R, CYBA, DDIT3, FCER1G, FCGR3A, HAVCR2, HLA-A, HSPB1, IL1B, IL1R1, IL6R, LGALS9, PYCARD, SERPINE1]
GO:0002685	regulation of leukocyte migration	GO_BiologicalProcess-EBI-UniProt-GOA-ACAP-ARAP_05.04.2022_00h00	1.05393e-13	4.17356e-11	1.29286e-19	4.6543e-18	[3, 4, 5, 6, 7]	Group36	8.71369	21	[C5AR1, CCL3, CCR2, CD74, CD81, CD9, CD99L2, CMKLR1, CSF1R, CXCR3, ICAM1, IL1R1, IL6R, LGALS9, LGMN, MMP14, MPP1, PYCARD, RAC1, SERPINE1, SWAP70]
GO:0030334	regulation of cell migration	GO_BiologicalProcess-EBI-UniProt-GOA-ACAP-ARAP_05.04.2022_00h00	1.4567e-14	5.78308e-12	1.29286e-19	4.6543e-18	[4, 5, 6]	Group36	4.20945	41	[ANXA3, APLP2, APOE, C5AR1, CCL3, CCR2, CD74, CD81, CD9, CD99L2, CMKLR1, CSF1R, CTSH, CXCR3, DNAJA4, GLUL, GRN, HBEGF, HSPA5, HSPB1, ICAM1, IL1B, IL1R1, IL6R, ITGAX, LGALS9, LGMN, MCAM, MMP14, MPP1, PDGFB, PECAM1, PRCP, PYCARD, RAC1, SDC4, SERPINE1, SGK1, SMOX, SRGAP3, SWAP70]
GO:0050727	regulation of inflammatory response	GO_BiologicalProcess-EBI-UniProt-GOA-ACAP-ARAP_05.04.2022_00h00	3.13033e-06	0.00105492	1.29286e-19	4.6543e-18	[4, 5, 6]	Group36	4.16667	16	[ABHD12, ALOX5AP, APOE, CASP4, CCL3, CCR2, CD81, CEBPA, CTSC, GRN, HAMP, IL1B, IL1R1, LGALS2, PYCARD, SERPINE1]
GO:0150076	neuroinflammatory response	GO_BiologicalProcess-EBI-UniProt-GOA-ACAP-ARAP_05.04.2022_00h00	6.92303e-07	0.000241614	1.29286e-19	4.6543e-18	[5]	Group36	11.4286	8	[C1QA, C5AR1, CCL3, CTSC, GRN, IL1B, ITGB2, SMOX]
GO:0002687	positive regulation of leukocyte migration	GO_BiologicalProcess-EBI-UniProt-GOA-ACAP-ARAP_05.04.2022_00h00	6.19559e-13	2.44106e-10	1.29286e-19	4.6543e-18	[3, 4, 5, 6, 7, 8]	Group36	10.9677	17	[C5AR1, CCL3, CCR2, CD74, CD99L2, CMKLR1, CSF1R, ICAM1, IL1R1, IL6R, LGALS9, LGMN, MMP14, PYCARD, RAC1, SERPINE1, SWAP70]
GO:0030335	positive regulation of cell migration	GO_BiologicalProcess-EBI-UniProt-GOA-ACAP-ARAP_05.04.2022_00h00	1.1195e-12	4.39963e-10	1.29286e-19	4.6543e-18	[4, 5, 6, 7]	Group36	5.18784	29	[ANXA3, C5AR1, CCL3, CCR2, CD74, CD99L2, CMKLR1, CSF1R, CTSH, GRN, HBEGF, HSPA5, HSPB1, ICAM1, IL1B, IL1R1, IL6R, ITGAX, LGALS9, LGMN, MCAM, MMP14, PDGFB, PECAM1, PYCARD, RAC1, SERPINE1, SMOX, SWAP70]
GO:0050729	positive regulation of inflammatory response	GO_BiologicalProcess-EBI-UniProt-GOA-ACAP-ARAP_05.04.2022_00h00	1.0305e-07	3.72009e-05	1.29286e-19	4.6543e-18	[4, 5, 6, 7]	Group36	7.64331	12	[ALOX5AP, CASP4, CCL3, CCR2, CD81, CEBPA, CTSC, GRN, IL1B, LGALS2, PYCARD, SERPINE1]
GO:0002548	monocyte chemotaxis	GO_BiologicalProcess-EBI-UniProt-GOA-ACAP-ARAP_05.04.2022_00h00	0.000127101	0.0324108	1.29286e-19	4.6543e-18	[4, 6, 7]	Group36	8.10811	6	[CCL3, CCR2, IL6R, LGMN, PDGFB, SERPINE1]
GO:0097530	granulocyte migration	GO_BiologicalProcess-EBI-UniProt-GOA-ACAP-ARAP_05.04.2022_00h00	3.36789e-10	1.30337e-07	1.29286e-19	4.6543e-18	[4, 6, 7]	Group36	8.82353	15	[BSG, C5AR1, CCL3, CD74, CD99L2, CMKLR1, CSF1R, FCER1G, IL1B, IL1R1, ITGB2, MPP1, PECAM1, PPIB, RAC1]
GO:1905517	macrophage migration	GO_BiologicalProcess-EBI-UniProt-GOA-ACAP-ARAP_05.04.2022_00h00	3.42506e-07	0.000121247	1.29286e-19	4.6543e-18	[4, 6, 7]	Group36	12.5	8	[C5AR1, CCL3, CCR2, CD81, CD9, CMKLR1, CSF1R, MMP14]
GO:0002688	regulation of leukocyte chemotaxis	GO_BiologicalProcess-EBI-UniProt-GOA-ACAP-ARAP_05.04.2022_00h00	2.58061e-09	9.7547e-07	1.29286e-19	4.6543e-18	[4, 5, 6, 7, 8]	Group36	9.35252	13	[C5AR1, CCL3, CCR2, CD74, CMKLR1, CSF1R, IL6R, LGALS9, LGMN, MPP1, RAC1, SERPINE1, SWAP70]
GO:0008347	glial cell migration	GO_BiologicalProcess-EBI-UniProt-GOA-ACAP-ARAP_05.04.2022_00h00	2.10831e-05	0.00626167	1.29286e-19	4.6543e-18	[4, 5, 6, 7, 8]	Group36	11.1111	6	[CCL3, CCR2, CD9, HEXB, MMP14, SRGAP3]
GO:0071621	granulocyte chemotaxis	GO_BiologicalProcess-EBI-UniProt-GOA-ACAP-ARAP_05.04.2022_00h00	3.12202e-08	1.14266e-05	1.29286e-19	4.6543e-18	[4, 5, 6, 7, 8]	Group36	8.51064	12	[BSG, C5AR1, CCL3, CD74, CMKLR1, CSF1R, FCER1G, IL1B, ITGB2, MPP1, PPIB, RAC1]
GO:0071675	regulation of mononuclear cell migration	GO_BiologicalProcess-EBI-UniProt-GOA-ACAP-ARAP_05.04.2022_00h00	8.66732e-07	0.000299889	1.29286e-19	4.6543e-18	[4, 5, 6, 7, 8]	Group36	7.93651	10	[C5AR1, CCL3, CCR2, CD99L2, CMKLR1, CSF1R, LGALS9, LGMN, PYCARD, SERPINE1]
GO:1905521	regulation of macrophage migration	GO_BiologicalProcess-EBI-UniProt-GOA-ACAP-ARAP_05.04.2022_00h00	5.57028e-07	0.000195517	1.29286e-19	4.6543e-18	[4, 5, 6, 7, 8]	Group36	14.8936	7	[C5AR1, CCL3, CD81, CD9, CMKLR1, CSF1R, MMP14]
GO:0002690	positive regulation of leukocyte chemotaxis	GO_BiologicalProcess-EBI-UniProt-GOA-ACAP-ARAP_05.04.2022_00h00	7.55889e-10	2.89506e-07	1.29286e-19	4.6543e-18	[4, 5, 6, 7, 8, 9]	Group36	11.7647	12	[C5AR1, CCL3, CCR2, CD74, CMKLR1, CSF1R, IL6R, LGALS9, LGMN, RAC1, SERPINE1, SWAP70]
GO:0071677	positive regulation of mononuclear cell migration	GO_BiologicalProcess-EBI-UniProt-GOA-ACAP-ARAP_05.04.2022_00h00	1.2551e-05	0.00385316	1.29286e-19	4.6543e-18	[4, 5, 6, 7, 8, 9]	Group36	9.45946	7	[CCL3, CCR2, CD99L2, LGALS9, LGMN, PYCARD, SERPINE1]
GO:1902622	regulation of neutrophil migration	GO_BiologicalProcess-EBI-UniProt-GOA-ACAP-ARAP_05.04.2022_00h00	1.50903e-05	0.00455727	1.29286e-19	4.6543e-18	[4, 5, 6, 7, 8, 9]	Group36	11.7647	6	[C5AR1, CD74, CD99L2, IL1R1, MPP1, RAC1]
GO:1905523	positive regulation of macrophage migration	GO_BiologicalProcess-EBI-UniProt-GOA-ACAP-ARAP_05.04.2022_00h00	6.6696e-06	0.00213427	1.29286e-19	4.6543e-18	[4, 5, 6, 7, 8, 9]	Group36	19.2308	5	[C5AR1, CCL3, CMKLR1, CSF1R, MMP14]
GO:1990266	neutrophil migration	GO_BiologicalProcess-EBI-UniProt-GOA-ACAP-ARAP_05.04.2022_00h00	2.81888e-09	1.0599e-06	1.29286e-19	4.6543e-18	[5, 7, 8]	Group36	9.28571	13	[BSG, C5AR1, CCL3, CD74, CD99L2, FCER1G, IL1B, IL1R1, ITGB2, MPP1, PECAM1, PPIB, RAC1]
GO:0030593	neutrophil chemotaxis	GO_BiologicalProcess-EBI-UniProt-GOA-ACAP-ARAP_05.04.2022_00h00	3.70503e-07	0.000130788	1.29286e-19	4.6543e-18	[5, 6, 7, 8, 9]	Group36	8.69565	10	[BSG, C5AR1, CCL3, CD74, FCER1G, IL1B, ITGB2, MPP1, PPIB, RAC1]
GO:0043615	astrocyte cell migration	GO_BiologicalProcess-EBI-UniProt-GOA-ACAP-ARAP_05.04.2022_00h00	7.98809e-07	0.000277187	1.29286e-19	4.6543e-18	[5, 6, 7, 8, 9]	Group36	50	4	[CCL3, CCR2, HEXB, MMP14]
GO:0071622	regulation of granulocyte chemotaxis	GO_BiologicalProcess-EBI-UniProt-GOA-ACAP-ARAP_05.04.2022_00h00	2.60472e-05	0.00757973	1.29286e-19	4.6543e-18	[5, 6, 7, 8, 9]	Group36	10.7143	6	[C5AR1, CD74, CMKLR1, CSF1R, MPP1, RAC1]
GO:1902624	positive regulation of neutrophil migration	GO_BiologicalProcess-EBI-UniProt-GOA-ACAP-ARAP_05.04.2022_00h00	4.02439e-05	0.011389	1.29286e-19	4.6543e-18	[4, 5, 6, 7, 8, 9, 10]	Group36	13.5135	5	[C5AR1, CD74, CD99L2, IL1R1, RAC1]
GO:0070374	positive regulation of ERK1 and ERK2 cascade	GO_BiologicalProcess-EBI-UniProt-GOA-ACAP-ARAP_05.04.2022_00h00	3.0253e-05	0.00877338	1.29286e-19	4.6543e-18	[6, 7, 8, 9]	Group36	4.82456	11	[APOE, C5AR1, CCL3, CD74, CSF1R, HAVCR2, ICAM1, LGALS9, MARCO, PDGFB, PYCARD]
R-HSA:1236977	Endosomal/Vacuolar pathway	REACTOME_Pathways_18.08.2022	3.67375e-06	0.00122703	1.11527e-23	4.23801e-22	[-1]	Group37	36.3636	4	[B2M, CTSL, CTSS, HLA-A]
R-HSA:6783783	Interleukin-10 signaling	REACTOME_Pathways_18.08.2022	5.57028e-07	0.000195517	1.11527e-23	4.23801e-22	[-1]	Group37	14.8936	7	[CCL3, CCR2, ICAM1, IL10RA, IL1B, IL1R1, IL1R2]
GO:0050900	leukocyte migration	GO_BiologicalProcess-EBI-UniProt-GOA-ACAP-ARAP_05.04.2022_00h00	6.5871e-16	2.62167e-13	1.11527e-23	4.23801e-22	[2, 4, 5]	Group37	6.9378	29	[BSG, C5AR1, CCL3, CCR2, CD74, CD81, CD9, CD99L2, CH25H, CMKLR1, CSF1R, CXCR3, FCER1G, ICAM1, IL1B, IL1R1, IL6R, ITGB2, LGALS9, LGMN, MMP14, MPP1, PDGFB, PECAM1, PPIB, PYCARD, RAC1, SERPINE1, SWAP70]
GO:0002699	positive regulation of immune effector process	GO_BiologicalProcess-EBI-UniProt-GOA-ACAP-ARAP_05.04.2022_00h00	5.58391e-06	0.00179802	1.11527e-23	4.23801e-22	[3, 4, 5]	Group37	4.83271	13	[APLP2, B2M, CCR2, CD74, CD81, CD84, CFP, HLA-A, IL1B, IL1R1, ITGB2, LGALS9, MR1]
GO:0032103	positive regulation of response to external stimulus	GO_BiologicalProcess-EBI-UniProt-GOA-ACAP-ARAP_05.04.2022_00h00	3.76044e-11	1.45905e-08	1.11527e-23	4.23801e-22	[3, 4, 5]	Group37	5.24109	25	[ALOX5AP, C5AR1, CASP4, CCL3, CCR2, CD74, CD81, CEBPA, CMKLR1, CSF1R, CTSC, CYBA, GRN, HAVCR2, HSPB1, IL1B, IL6R, LGALS2, LGALS9, LGMN, PDGFB, PYCARD, RAC1, SERPINE1, SWAP70]
GO:0050866	negative regulation of cell activation	GO_BiologicalProcess-EBI-UniProt-GOA-ACAP-ARAP_05.04.2022_00h00	4.13873e-06	0.00136992	1.11527e-23	4.23801e-22	[3, 4, 5]	Group37	5.40541	12	[APOE, CCR2, CD74, CD84, CD9, FGL2, GRN, HAVCR2, LGALS9, MERTK, PDGFB, SDC4]
GO:0050867	positive regulation of cell activation	GO_BiologicalProcess-EBI-UniProt-GOA-ACAP-ARAP_05.04.2022_00h00	1.1381e-08	4.24511e-06	1.11527e-23	4.23801e-22	[3, 4, 5]	Group37	4.47154	22	[B2M, CCL3, CCR2, CD74, CD81, CD83, CEBPA, CTSC, FCGR3A, HAMP, HAVCR1, HAVCR2, HLA-A, HLA-DOA, HLA-DOB, IGF2, IL1B, ITGB2, LGALS9, MMP14, PLEK, PYCARD]
GO:0050920	regulation of chemotaxis	GO_BiologicalProcess-EBI-UniProt-GOA-ACAP-ARAP_05.04.2022_00h00	4.9718e-08	1.80973e-05	1.11527e-23	4.23801e-22	[3, 4, 5]	Group37	6.12245	15	[C5AR1, CCL3, CCR2, CD74, CMKLR1, CSF1R, HSPB1, IL6R, LGALS9, LGMN, MPP1, PDGFB, RAC1, SERPINE1, SWAP70]
GO:0002275	myeloid cell activation involved in immune response	GO_BiologicalProcess-EBI-UniProt-GOA-ACAP-ARAP_05.04.2022_00h00	1.8779e-07	6.70412e-05	1.11527e-23	4.23801e-22	[4, 5]	Group37	9.34579	10	[ANXA3, CCL3, CCR2, CD84, FCER1G, GRN, HAVCR2, ITGB2, LGALS9, PYCARD]
GO:0002285	lymphocyte activation involved in immune response	GO_BiologicalProcess-EBI-UniProt-GOA-ACAP-ARAP_05.04.2022_00h00	9.10163e-05	0.0243013	1.11527e-23	4.23801e-22	[4, 5]	Group37	4.6729	10	[CD74, CD81, FCER1G, FCGR3A, FGL2, HAVCR2, ICAM1, IL6R, LGALS9, SWAP70]
GO:0002367	cytokine production involved in immune response	GO_BiologicalProcess-EBI-UniProt-GOA-ACAP-ARAP_05.04.2022_00h00	0.00018073	0.0442788	1.11527e-23	4.23801e-22	[3, 6]	Group37	6.25	7	[B2M, CCR2, CD74, CD81, HLA-A, IL1B, IL1R1]
GO:0002696	positive regulation of leukocyte activation	GO_BiologicalProcess-EBI-UniProt-GOA-ACAP-ARAP_05.04.2022_00h00	2.83402e-08	1.04292e-05	1.11527e-23	4.23801e-22	[3, 4, 5, 6]	Group37	4.43975	21	[B2M, CCL3, CCR2, CD74, CD81, CD83, CEBPA, CTSC, FCGR3A, HAMP, HAVCR1, HAVCR2, HLA-A, HLA-DOA, HLA-DOB, IGF2, IL1B, ITGB2, LGALS9, MMP14, PYCARD]
GO:0002703	regulation of leukocyte mediated immunity	GO_BiologicalProcess-EBI-UniProt-GOA-ACAP-ARAP_05.04.2022_00h00	1.12761e-05	0.0034843	1.11527e-23	4.23801e-22	[4, 5]	Group37	4.89796	12	[B2M, CCR2, CD81, CD84, HAVCR2, HLA-A, ICAM1, IL1B, IL1R1, ITGB2, LGALS9, MR1]
GO:0031349	positive regulation of defense response	GO_BiologicalProcess-EBI-UniProt-GOA-ACAP-ARAP_05.04.2022_00h00	7.07809e-06	0.00225791	1.11527e-23	4.23801e-22	[3, 4, 5, 6]	Group37	4.40252	14	[ALOX5AP, CASP4, CCL3, CCR2, CD81, CEBPA, CTSC, CYBA, GRN, HAVCR2, IL1B, LGALS2, PYCARD, SERPINE1]
GO:0032602	chemokine production	GO_BiologicalProcess-EBI-UniProt-GOA-ACAP-ARAP_05.04.2022_00h00	1.12327e-05	0.00348214	1.11527e-23	4.23801e-22	[3, 6]	Group37	7.92079	8	[CD74, CD84, CSF1R, HAVCR2, IL1B, IL6R, LGALS9, PYCARD]
GO:0032609	interferon-gamma production	GO_BiologicalProcess-EBI-UniProt-GOA-ACAP-ARAP_05.04.2022_00h00	3.94198e-05	0.0111952	1.11527e-23	4.23801e-22	[3, 6]	Group37	6.66667	8	[CCR2, DDIT3, HAVCR2, HLA-A, IL1B, IL1R1, LGALS9, PYCARD]
GO:0032633	interleukin-4 production	GO_BiologicalProcess-EBI-UniProt-GOA-ACAP-ARAP_05.04.2022_00h00	1.94003e-05	0.00580068	1.11527e-23	4.23801e-22	[3, 6]	Group37	15.625	5	[CD83, DDIT3, FCER1G, HAVCR2, LGALS9]
GO:0036230	granulocyte activation	GO_BiologicalProcess-EBI-UniProt-GOA-ACAP-ARAP_05.04.2022_00h00	1.34314e-05	0.00409658	1.11527e-23	4.23801e-22	[4, 5]	Group37	12	6	[ANXA3, CCL3, CCR2, FCER1G, GRN, ITGB2]
GO:0042110	T cell activation	GO_BiologicalProcess-EBI-UniProt-GOA-ACAP-ARAP_05.04.2022_00h00	3.46968e-08	1.26643e-05	1.11527e-23	4.23801e-22	[4, 5]	Group37	4.03509	23	[B2M, CCR2, CD74, CD81, CD83, CD84, CTSL, FCER1G, FGL2, HAVCR2, HLA-A, HLA-DOA, HLA-DOB, ICAM1, IGF2, IL1B, IL6R, LGALS9, MAFB, MR1, PYCARD, SDC4, TCIRG1]
GO:0042116	macrophage activation	GO_BiologicalProcess-EBI-UniProt-GOA-ACAP-ARAP_05.04.2022_00h00	2.03245e-09	7.7233e-07	1.11527e-23	4.23801e-22	[4, 5]	Group37	10.8108	12	[C1QA, C5AR1, CCL3, CD74, CD84, CEBPA, CTSC, FCGR3A, GRN, HAMP, HAVCR2, ITGB2]
GO:0050921	positive regulation of chemotaxis	GO_BiologicalProcess-EBI-UniProt-GOA-ACAP-ARAP_05.04.2022_00h00	8.99786e-10	3.43718e-07	1.11527e-23	4.23801e-22	[3, 4, 5, 6]	Group37	9.09091	14	[C5AR1, CCL3, CCR2, CD74, CMKLR1, CSF1R, HSPB1, IL6R, LGALS9, LGMN, PDGFB, RAC1, SERPINE1, SWAP70]
GO:0060326	cell chemotaxis	GO_BiologicalProcess-EBI-UniProt-GOA-ACAP-ARAP_05.04.2022_00h00	1.58479e-12	6.21239e-10	1.11527e-23	4.23801e-22	[4, 5]	Group37	6.72515	23	[BSG, C5AR1, CCL3, CCR2, CD74, CH25H, CMKLR1, CSF1R, CXCR3, FCER1G, HBEGF, HSPB1, IL1B, IL6R, ITGB2, LGALS9, LGMN, MPP1, PDGFB, PPIB, RAC1, SERPINE1, SWAP70]
GO:0070663	regulation of leukocyte proliferation	GO_BiologicalProcess-EBI-UniProt-GOA-ACAP-ARAP_05.04.2022_00h00	6.55116e-06	0.00210292	1.11527e-23	4.23801e-22	[4, 5]	Group37	4.7619	13	[CCR2, CD74, CD81, CSF1R, CSF2RB, FCGR3A, HAVCR2, HLA-A, IGF2, IL1B, LGALS9, PYCARD, SDC4]
GO:0071706	tumor necrosis factor superfamily cytokine production	GO_BiologicalProcess-EBI-UniProt-GOA-ACAP-ARAP_05.04.2022_00h00	0.000133724	0.0338322	1.11527e-23	4.23801e-22	[3, 6]	Group37	4.94506	9	[CCL3, CCR2, CD84, CYBA, FCGR3A, HAVCR2, HSPB1, LGALS9, PYCARD]
GO:0001819	positive regulation of cytokine production	GO_BiologicalProcess-EBI-UniProt-GOA-ACAP-ARAP_05.04.2022_00h00	2.32377e-08	8.59796e-06	1.11527e-23	4.23801e-22	[3, 4, 5, 6, 7]	Group37	4.29688	22	[B2M, C5AR1, CCL3, CCR2, CD74, CD81, CD83, CD84, CSF1R, CYBA, DDIT3, FCER1G, FCGR3A, HAVCR2, HLA-A, HSPB1, IL1B, IL1R1, IL6R, LGALS9, PYCARD, SERPINE1]
GO:0002456	T cell mediated immunity	GO_BiologicalProcess-EBI-UniProt-GOA-ACAP-ARAP_05.04.2022_00h00	5.956e-07	0.00020846	1.11527e-23	4.23801e-22	[5]	Group37	8.26446	10	[B2M, CCR2, CD81, CTSC, CTSH, HLA-A, ICAM1, IL1B, IL1R1, MR1]
GO:0002685	regulation of leukocyte migration	GO_BiologicalProcess-EBI-UniProt-GOA-ACAP-ARAP_05.04.2022_00h00	1.05393e-13	4.17356e-11	1.11527e-23	4.23801e-22	[3, 4, 5, 6, 7]	Group37	8.71369	21	[C5AR1, CCL3, CCR2, CD74, CD81, CD9, CD99L2, CMKLR1, CSF1R, CXCR3, ICAM1, IL1R1, IL6R, LGALS9, LGMN, MMP14, MPP1, PYCARD, RAC1, SERPINE1, SWAP70]
GO:0002821	positive regulation of adaptive immune response	GO_BiologicalProcess-EBI-UniProt-GOA-ACAP-ARAP_05.04.2022_00h00	3.94198e-05	0.0111952	1.11527e-23	4.23801e-22	[4, 5, 6]	Group37	6.66667	8	[B2M, CCR2, CD81, HLA-A, IL1B, IL1R1, MR1, PYCARD]
GO:0019724	B cell mediated immunity	GO_BiologicalProcess-EBI-UniProt-GOA-ACAP-ARAP_05.04.2022_00h00	0.000170382	0.0420843	1.11527e-23	4.23801e-22	[5]	Group37	4.329	10	[C1QA, C1QB, C1QC, CD74, CD81, CSF2RB, FCER1G, FCGR3A, SWAP70, TCIRG1]
GO:0022409	positive regulation of cell-cell adhesion	GO_BiologicalProcess-EBI-UniProt-GOA-ACAP-ARAP_05.04.2022_00h00	9.38344e-06	0.00296517	1.11527e-23	4.23801e-22	[4, 5, 6]	Group37	4.29448	14	[B2M, CCR2, CD74, CD81, CD83, HAVCR2, HLA-A, HLA-DOA, HLA-DOB, IGF2, IL1B, ITGB2, LGALS9, PYCARD]
GO:0043030	regulation of macrophage activation	GO_BiologicalProcess-EBI-UniProt-GOA-ACAP-ARAP_05.04.2022_00h00	3.87095e-07	0.000136257	1.11527e-23	4.23801e-22	[4, 5, 6]	Group37	12.3077	8	[CCL3, CD74, CD84, CEBPA, CTSC, GRN, HAMP, HAVCR2]
GO:0070665	positive regulation of leukocyte proliferation	GO_BiologicalProcess-EBI-UniProt-GOA-ACAP-ARAP_05.04.2022_00h00	2.62073e-07	9.30358e-05	1.11527e-23	4.23801e-22	[4, 5, 6]	Group37	7.01754	12	[CCR2, CD74, CD81, CSF1R, CSF2RB, FCGR3A, HAVCR2, HLA-A, IGF2, IL1B, LGALS9, PYCARD]
GO:0043299	leukocyte degranulation	GO_BiologicalProcess-EBI-UniProt-GOA-ACAP-ARAP_05.04.2022_00h00	4.20943e-05	0.0118706	1.11527e-23	4.23801e-22	[3, 4, 6, 7, 8]	Group37	7.86517	7	[ANXA3, CCL3, CCR2, CD84, FCGR3A, ITGB2, LGALS9]
GO:0002286	T cell activation involved in immune response	GO_BiologicalProcess-EBI-UniProt-GOA-ACAP-ARAP_05.04.2022_00h00	3.94198e-05	0.0111952	1.11527e-23	4.23801e-22	[5, 6]	Group37	6.66667	8	[CD74, CD81, FCER1G, FGL2, HAVCR2, ICAM1, IL6R, LGALS9]
GO:0002687	positive regulation of leukocyte migration	GO_BiologicalProcess-EBI-UniProt-GOA-ACAP-ARAP_05.04.2022_00h00	6.19559e-13	2.44106e-10	1.11527e-23	4.23801e-22	[3, 4, 5, 6, 7, 8]	Group37	10.9677	17	[C5AR1, CCL3, CCR2, CD74, CD99L2, CMKLR1, CSF1R, ICAM1, IL1R1, IL6R, LGALS9, LGMN, MMP14, PYCARD, RAC1, SERPINE1, SWAP70]
GO:0002706	regulation of lymphocyte mediated immunity	GO_BiologicalProcess-EBI-UniProt-GOA-ACAP-ARAP_05.04.2022_00h00	0.000117881	0.0304132	1.11527e-23	4.23801e-22	[5, 6]	Group37	5.02793	9	[B2M, CCR2, CD81, HAVCR2, HLA-A, IL1B, IL1R1, LGALS9, MR1]
GO:0002718	regulation of cytokine production involved in immune response	GO_BiologicalProcess-EBI-UniProt-GOA-ACAP-ARAP_05.04.2022_00h00	0.00018073	0.0442788	1.11527e-23	4.23801e-22	[4, 5, 6, 7]	Group37	6.25	7	[B2M, CCR2, CD74, CD81, HLA-A, IL1B, IL1R1]
GO:0032640	tumor necrosis factor production	GO_BiologicalProcess-EBI-UniProt-GOA-ACAP-ARAP_05.04.2022_00h00	0.00010364	0.0271537	1.11527e-23	4.23801e-22	[4, 7]	Group37	5.11364	9	[CCL3, CCR2, CD84, CYBA, FCGR3A, HAVCR2, HSPB1, LGALS9, PYCARD]
GO:0032642	regulation of chemokine production	GO_BiologicalProcess-EBI-UniProt-GOA-ACAP-ARAP_05.04.2022_00h00	1.12327e-05	0.00348214	1.11527e-23	4.23801e-22	[4, 5, 6, 7]	Group37	7.92079	8	[CD74, CD84, CSF1R, HAVCR2, IL1B, IL6R, LGALS9, PYCARD]
GO:0032649	regulation of interferon-gamma production	GO_BiologicalProcess-EBI-UniProt-GOA-ACAP-ARAP_05.04.2022_00h00	3.94198e-05	0.0111952	1.11527e-23	4.23801e-22	[4, 5, 6, 7]	Group37	6.66667	8	[CCR2, DDIT3, HAVCR2, HLA-A, IL1B, IL1R1, LGALS9, PYCARD]
GO:0032673	regulation of interleukin-4 production	GO_BiologicalProcess-EBI-UniProt-GOA-ACAP-ARAP_05.04.2022_00h00	1.94003e-05	0.00580068	1.11527e-23	4.23801e-22	[4, 5, 6, 7]	Group37	15.625	5	[CD83, DDIT3, FCER1G, HAVCR2, LGALS9]
GO:0032944	regulation of mononuclear cell proliferation	GO_BiologicalProcess-EBI-UniProt-GOA-ACAP-ARAP_05.04.2022_00h00	6.9769e-05	0.0189074	1.11527e-23	4.23801e-22	[5, 6]	Group37	4.4	11	[CCR2, CD74, CD81, FCGR3A, HAVCR2, HLA-A, IGF2, IL1B, LGALS9, PYCARD, SDC4]
GO:1903037	regulation of leukocyte cell-cell adhesion	GO_BiologicalProcess-EBI-UniProt-GOA-ACAP-ARAP_05.04.2022_00h00	1.94037e-06	0.000659727	1.11527e-23	4.23801e-22	[5, 6]	Group37	4.32432	16	[B2M, CCR2, CD74, CD81, CD83, FGL2, HAVCR2, HLA-A, HLA-DOA, HLA-DOB, IGF2, IL1B, ITGB2, LGALS9, PYCARD, SDC4]
GO:1903555	regulation of tumor necrosis factor superfamily cytokine production	GO_BiologicalProcess-EBI-UniProt-GOA-ACAP-ARAP_05.04.2022_00h00	0.000133724	0.0338322	1.11527e-23	4.23801e-22	[4, 5, 6, 7]	Group37	4.94506	9	[CCL3, CCR2, CD84, CYBA, FCGR3A, HAVCR2, HSPB1, LGALS9, PYCARD]
GO:0002369	T cell cytokine production	GO_BiologicalProcess-EBI-UniProt-GOA-ACAP-ARAP_05.04.2022_00h00	4.75401e-06	0.00154505	1.11527e-23	4.23801e-22	[4, 6, 7]	Group37	14.2857	6	[B2M, CCR2, CD81, HLA-A, IL1B, IL1R1]
GO:0002720	positive regulation of cytokine production involved in immune response	GO_BiologicalProcess-EBI-UniProt-GOA-ACAP-ARAP_05.04.2022_00h00	0.00018262	0.0445592	1.11527e-23	4.23801e-22	[4, 5, 6, 7, 8]	Group37	7.59494	6	[B2M, CD74, CD81, HLA-A, IL1B, IL1R1]
GO:0002824	positive regulation of adaptive immune response based on somatic recombination of immune receptors built from immunoglobulin superfamily domains	GO_BiologicalProcess-EBI-UniProt-GOA-ACAP-ARAP_05.04.2022_00h00	0.000201689	0.0488088	1.11527e-23	4.23801e-22	[5, 6, 7]	Group37	6.14035	7	[B2M, CCR2, CD81, HLA-A, IL1B, IL1R1, MR1]
GO:0016064	immunoglobulin mediated immune response	GO_BiologicalProcess-EBI-UniProt-GOA-ACAP-ARAP_05.04.2022_00h00	0.000153199	0.0381464	1.11527e-23	4.23801e-22	[6]	Group37	4.38596	10	[C1QA, C1QB, C1QC, CD74, CD81, CSF2RB, FCER1G, FCGR3A, SWAP70, TCIRG1]
GO:0032722	positive regulation of chemokine production	GO_BiologicalProcess-EBI-UniProt-GOA-ACAP-ARAP_05.04.2022_00h00	1.4494e-06	0.000495695	1.11527e-23	4.23801e-22	[4, 5, 6, 7, 8]	Group37	10.3896	8	[CD74, CD84, CSF1R, HAVCR2, IL1B, IL6R, LGALS9, PYCARD]
GO:0032729	positive regulation of interferon-gamma production	GO_BiologicalProcess-EBI-UniProt-GOA-ACAP-ARAP_05.04.2022_00h00	2.27974e-05	0.00667963	1.11527e-23	4.23801e-22	[4, 5, 6, 7, 8]	Group37	8.64198	7	[CCR2, HAVCR2, HLA-A, IL1B, IL1R1, LGALS9, PYCARD]
GO:0032757	positive regulation of interleukin-8 production	GO_BiologicalProcess-EBI-UniProt-GOA-ACAP-ARAP_05.04.2022_00h00	0.000100854	0.0266256	1.11527e-23	4.23801e-22	[4, 5, 6, 7, 8]	Group37	8.4507	6	[CD74, DDIT3, IL1B, LGALS9, PYCARD, SERPINE1]
GO:0032946	positive regulation of mononuclear cell proliferation	GO_BiologicalProcess-EBI-UniProt-GOA-ACAP-ARAP_05.04.2022_00h00	5.05343e-06	0.00163731	1.11527e-23	4.23801e-22	[5, 6, 7]	Group37	6.53595	10	[CCR2, CD74, CD81, FCGR3A, HAVCR2, HLA-A, IGF2, IL1B, LGALS9, PYCARD]
GO:0050670	regulation of lymphocyte proliferation	GO_BiologicalProcess-EBI-UniProt-GOA-ACAP-ARAP_05.04.2022_00h00	5.81878e-05	0.0160598	1.11527e-23	4.23801e-22	[5, 6, 7]	Group37	4.4898	11	[CCR2, CD74, CD81, FCGR3A, HAVCR2, HLA-A, IGF2, IL1B, LGALS9, PYCARD, SDC4]
GO:0050830	defense response to Gram-positive bacterium	GO_BiologicalProcess-EBI-UniProt-GOA-ACAP-ARAP_05.04.2022_00h00	4.01066e-06	0.00133154	1.11527e-23	4.23801e-22	[5, 6, 7]	Group37	7.69231	9	[C5AR1, CASP4, HAVCR2, HLA-A, IL1B, LYG1, MPEG1, MR1, PYCARD]
GO:1903039	positive regulation of leukocyte cell-cell adhesion	GO_BiologicalProcess-EBI-UniProt-GOA-ACAP-ARAP_05.04.2022_00h00	1.36748e-06	0.000470412	1.11527e-23	4.23801e-22	[5, 6, 7]	Group37	5.07246	14	[B2M, CCR2, CD74, CD81, CD83, HAVCR2, HLA-A, HLA-DOA, HLA-DOB, IGF2, IL1B, ITGB2, LGALS9, PYCARD]
GO:1903557	positive regulation of tumor necrosis factor superfamily cytokine production	GO_BiologicalProcess-EBI-UniProt-GOA-ACAP-ARAP_05.04.2022_00h00	3.73564e-06	0.00124397	1.11527e-23	4.23801e-22	[4, 5, 6, 7, 8]	Group37	7.75862	9	[CCL3, CCR2, CD84, CYBA, FCGR3A, HAVCR2, HSPB1, LGALS9, PYCARD]
GO:2001188	regulation of T cell activation via T cell receptor contact with antigen bound to MHC molecule on antigen presenting cell	GO_BiologicalProcess-EBI-UniProt-GOA-ACAP-ARAP_05.04.2022_00h00	2.2287e-05	0.00655237	1.11527e-23	4.23801e-22	[4, 5, 6, 7, 8]	Group37	50	3	[CD81, HAVCR2, LGALS9]
GO:0002291	T cell activation via T cell receptor contact with antigen bound to MHC molecule on antigen presenting cell	GO_BiologicalProcess-EBI-UniProt-GOA-ACAP-ARAP_05.04.2022_00h00	2.92927e-08	1.07504e-05	1.11527e-23	4.23801e-22	[6, 7]	Group37	50	5	[CD81, FGL2, HAVCR2, ICAM1, LGALS9]
GO:0002690	positive regulation of leukocyte chemotaxis	GO_BiologicalProcess-EBI-UniProt-GOA-ACAP-ARAP_05.04.2022_00h00	7.55889e-10	2.89506e-07	1.11527e-23	4.23801e-22	[4, 5, 6, 7, 8, 9]	Group37	11.7647	12	[C5AR1, CCL3, CCR2, CD74, CMKLR1, CSF1R, IL6R, LGALS9, LGMN, RAC1, SERPINE1, SWAP70]
GO:0002693	positive regulation of cellular extravasation	GO_BiologicalProcess-EBI-UniProt-GOA-ACAP-ARAP_05.04.2022_00h00	5.00842e-05	0.0139735	1.11527e-23	4.23801e-22	[4, 5, 6, 7, 8, 9]	Group37	20	4	[CCR2, CD99L2, ICAM1, IL1R1]
GO:0002709	regulation of T cell mediated immunity	GO_BiologicalProcess-EBI-UniProt-GOA-ACAP-ARAP_05.04.2022_00h00	4.85835e-05	0.0136034	1.11527e-23	4.23801e-22	[6, 7]	Group37	7.69231	7	[B2M, CCR2, CD81, HLA-A, IL1B, IL1R1, MR1]
GO:0002724	regulation of T cell cytokine production	GO_BiologicalProcess-EBI-UniProt-GOA-ACAP-ARAP_05.04.2022_00h00	4.75401e-06	0.00154505	1.11527e-23	4.23801e-22	[5, 6, 7, 8]	Group37	14.2857	6	[B2M, CCR2, CD81, HLA-A, IL1B, IL1R1]
GO:0032680	regulation of tumor necrosis factor production	GO_BiologicalProcess-EBI-UniProt-GOA-ACAP-ARAP_05.04.2022_00h00	0.00010364	0.0271537	1.11527e-23	4.23801e-22	[5, 6, 7, 8]	Group37	5.11364	9	[CCL3, CCR2, CD84, CYBA, FCGR3A, HAVCR2, HSPB1, LGALS9, PYCARD]
GO:0046456	icosanoid biosynthetic process	GO_BiologicalProcess-EBI-UniProt-GOA-ACAP-ARAP_05.04.2022_00h00	7.27592e-05	0.019645	1.11527e-23	4.23801e-22	[6, 7]	Group37	8.95522	6	[ALOX5AP, CD74, FABP5, IL1B, LTA4H, PYCARD]
GO:0050671	positive regulation of lymphocyte proliferation	GO_BiologicalProcess-EBI-UniProt-GOA-ACAP-ARAP_05.04.2022_00h00	4.49302e-06	0.00146922	1.11527e-23	4.23801e-22	[5, 6, 7, 8]	Group37	6.62252	10	[CCR2, CD74, CD81, FCGR3A, HAVCR2, HLA-A, IGF2, IL1B, LGALS9, PYCARD]
GO:0050870	positive regulation of T cell activation	GO_BiologicalProcess-EBI-UniProt-GOA-ACAP-ARAP_05.04.2022_00h00	2.98397e-06	0.00100858	1.11527e-23	4.23801e-22	[5, 6, 7, 8]	Group37	5.11811	13	[B2M, CCR2, CD74, CD81, CD83, HAVCR2, HLA-A, HLA-DOA, HLA-DOB, IGF2, IL1B, LGALS9, PYCARD]
GO:0071677	positive regulation of mononuclear cell migration	GO_BiologicalProcess-EBI-UniProt-GOA-ACAP-ARAP_05.04.2022_00h00	1.2551e-05	0.00385316	1.11527e-23	4.23801e-22	[4, 5, 6, 7, 8, 9]	Group37	9.45946	7	[CCL3, CCR2, CD99L2, LGALS9, LGMN, PYCARD, SERPINE1]
GO:0002711	positive regulation of T cell mediated immunity	GO_BiologicalProcess-EBI-UniProt-GOA-ACAP-ARAP_05.04.2022_00h00	3.52156e-05	0.0100364	1.11527e-23	4.23801e-22	[6, 7, 8]	Group37	10.1695	6	[B2M, CD81, HLA-A, IL1B, IL1R1, MR1]
GO:0002726	positive regulation of T cell cytokine production	GO_BiologicalProcess-EBI-UniProt-GOA-ACAP-ARAP_05.04.2022_00h00	9.79638e-06	0.00306627	1.11527e-23	4.23801e-22	[5, 6, 7, 8, 9]	Group37	17.8571	5	[B2M, CD81, HLA-A, IL1B, IL1R1]
GO:0032760	positive regulation of tumor necrosis factor production	GO_BiologicalProcess-EBI-UniProt-GOA-ACAP-ARAP_05.04.2022_00h00	2.79116e-06	0.000946204	1.11527e-23	4.23801e-22	[5, 6, 7, 8, 9]	Group37	8.03571	9	[CCL3, CCR2, CD84, CYBA, FCGR3A, HAVCR2, HSPB1, LGALS9, PYCARD]
GO:0042129	regulation of T cell proliferation	GO_BiologicalProcess-EBI-UniProt-GOA-ACAP-ARAP_05.04.2022_00h00	0.000157585	0.0390812	1.11527e-23	4.23801e-22	[6, 7, 8]	Group37	4.83871	9	[CCR2, CD81, HAVCR2, HLA-A, IGF2, IL1B, LGALS9, PYCARD, SDC4]
GO:0042102	positive regulation of T cell proliferation	GO_BiologicalProcess-EBI-UniProt-GOA-ACAP-ARAP_05.04.2022_00h00	1.96604e-05	0.00585879	1.11527e-23	4.23801e-22	[6, 7, 8, 9]	Group37	7.33945	8	[CCR2, CD81, HAVCR2, HLA-A, IGF2, IL1B, LGALS9, PYCARD]
GO:0070374	positive regulation of ERK1 and ERK2 cascade	GO_BiologicalProcess-EBI-UniProt-GOA-ACAP-ARAP_05.04.2022_00h00	3.0253e-05	0.00877338	1.11527e-23	4.23801e-22	[6, 7, 8, 9]	Group37	4.82456	11	[APOE, C5AR1, CCL3, CD74, CSF1R, HAVCR2, ICAM1, LGALS9, MARCO, PDGFB, PYCARD]
GO:0030217	T cell differentiation	GO_BiologicalProcess-EBI-UniProt-GOA-ACAP-ARAP_05.04.2022_00h00	4.38825e-06	0.00143935	1.11527e-23	4.23801e-22	[5, 6, 7, 8, 9, 10, 11]	Group37	4.59016	14	[B2M, CCR2, CD74, CD83, CTSL, FCER1G, FGL2, HLA-DOA, IL1B, IL6R, LGALS9, MAFB, MR1, TCIRG1]
GO:0046641	positive regulation of alpha-beta T cell proliferation	GO_BiologicalProcess-EBI-UniProt-GOA-ACAP-ARAP_05.04.2022_00h00	8.93071e-05	0.0239343	1.11527e-23	4.23801e-22	[7, 8, 9, 10]	Group37	17.3913	4	[CCR2, CD81, HLA-A, LGALS9]

## Sheet: MarkersDC_sign_up
	p_val	avg_log2FC	pct.1	pct.2	p_val_adj
siglec15l	0	2.9311	0.939	0.133	0
ccl19a.1	2.05e-195	2.83882	1	0.534	2.93e-191
chl1a	0	2.24804	0.934	0.049	0
rgs2	8.43e-155	2.19987	0.904	0.373	1.21e-150
hepacam2	0	1.92755	0.909	0.112	0
id2a	7.34e-176	1.63427	0.79	0.177	1.05e-171
plekhf1	1.82e-112	1.60049	0.61	0.151	2.6e-108
CABZ01080568.1	2.29e-123	1.54755	0.987	0.696	3.27e-119
socs3a	3.36e-81	1.47019	0.967	0.779	4.81e-77
nck1a	3.81e-175	1.44149	0.775	0.175	5.45e-171
zgc:162730	3.51e-117	1.40907	1	0.877	5.03e-113
zgc:171686	9.1e-271	1.39868	0.719	0.066	1.3e-266
si:dkey-23a13.11	0	1.37926	0.727	0.034	0
ehbp1l1b	2.16e-215	1.37856	0.797	0.147	3.09e-211
il12rb2l	1.52e-216	1.35065	0.757	0.12	2.18e-212
mpeg1.1	4.24e-129	1.32553	0.934	0.392	6.07e-125
atf3	1.18e-54	1.25992	0.59	0.26	1.69e-50
arhgap12b	1.84e-180	1.22784	0.742	0.149	2.63e-176
irf8	6.16e-104	1.1358	0.752	0.254	8.81e-100
mcl1b	1.9e-87	1.13382	0.873	0.497	2.72e-83
hsp70l	1.16e-76	1.10063	1	0.972	1.67e-72
ppp1r15a	1.2e-68	1.09026	0.722	0.341	1.72e-64
plxnc1	1.29e-116	1.08661	0.775	0.269	1.84e-112
fybb	1.75e-108	1.05964	0.754	0.266	2.5e-104
cmtm7	1.02e-181	1.04608	0.63	0.091	1.45e-177
BX897691.1	3.3e-82	1.04348	0.749	0.323	4.72e-78
actb1	2.08e-98	0.998533	1	0.973	2.97e-94
ptprja	7.41e-189	0.992699	0.638	0.084	1.06e-184
def6a	8.8e-85	0.992047	0.597	0.199	1.26e-80
si:dkeyp-94g1.1	3.67e-250	0.983504	0.557	0.029	5.24e-246
pigrl4.2	4.02e-232	0.978757	0.57	0.039	5.75e-228
si:dkey-238d18.5	2.47e-184	0.976073	0.651	0.092	3.53e-180
BX927333.1	1.59e-265	0.957568	0.554	0.023	2.27e-261
spock3	1.88e-136	0.951701	0.547	0.083	2.69e-132
plekho2	1.21e-87	0.935602	0.762	0.319	1.73e-83
gpatch8	3.94e-102	0.931802	0.696	0.223	5.64e-98
fkbp5	1.66e-63	0.930025	0.742	0.392	2.37e-59
cblb	9.76e-95	0.925489	0.661	0.202	1.4e-90
ddit4	2.15e-42	0.921939	0.43	0.157	3.07e-38
cyth4a	1.66e-100	0.916859	0.633	0.181	2.38e-96
fes	3.23e-169	0.903341	0.597	0.083	4.62e-165
tcima	8.8e-63	0.90231	0.919	0.566	1.26e-58
cited4b	4.95e-23	0.896323	0.382	0.193	7.09e-19
glb1l	3.43e-120	0.894775	0.663	0.158	4.91e-116
slc15a4	2.43e-112	0.884253	0.699	0.184	3.48e-108
actn1	4.72e-151	0.882624	0.544	0.075	6.75e-147
cnn3a	6.13e-189	0.880971	0.476	0.032	8.77e-185
arhgef15	6.14e-138	0.877491	0.572	0.094	8.78e-134
epdl1	3.6e-118	0.871704	0.638	0.132	5.15e-114
si:dkey-56m19.5	2.36e-84	0.854436	0.643	0.204	3.38e-80
junba	4.03e-51	0.844865	0.937	0.618	5.77e-47
aif1l	2.98e-90	0.841897	0.749	0.246	4.27e-86
rac2	1.19e-77	0.840758	0.97	0.721	1.7e-73
si:ch211-79k12.1	1.9e-77	0.834426	0.635	0.221	2.71e-73
cadm4	1.06e-130	0.832215	0.542	0.09	1.51e-126
ubb	1.81e-52	0.829866	0.987	0.918	2.58e-48
fam49ba	2.27e-74	0.826974	0.714	0.314	3.25e-70
crybg1a	1.79e-185	0.821291	0.494	0.038	2.56e-181
kdm2ba	1.78e-102	0.817873	0.514	0.107	2.55e-98
kazald3	1.15e-151	0.814853	0.527	0.067	1.64e-147
lcp1	1.11e-62	0.813503	0.699	0.328	1.58e-58
klf6a	7.99e-32	0.810859	0.924	0.821	1.14e-27
flt3	6.14e-176	0.806236	0.534	0.053	8.78e-172
dapp1	2.4e-159	0.79473	0.468	0.044	3.43e-155
fosab	2.11e-43	0.793355	0.982	0.93	3.02e-39
ank2b	2.97e-213	0.790134	0.453	0.018	4.25e-209
gadd45bb	7.16e-30	0.780587	0.453	0.21	1.02e-25
rab5aa	1.82e-65	0.778854	0.61	0.234	2.61e-61
desi2	8.7e-121	0.773549	0.549	0.1	1.24e-116
irak3	4e-81	0.77144	0.557	0.158	5.72e-77
krt18b	8.36e-75	0.768754	0.742	0.265	1.2e-70
si:ch211-215e19.6	1.37e-149	0.763641	0.499	0.058	1.96e-145
top1l	5.08e-48	0.763084	0.643	0.309	7.27e-44
dusp6	4.81e-62	0.757777	0.565	0.201	6.89e-58
xcr1a.1	6.68e-155	0.756363	0.486	0.052	9.56e-151
srgap2	1.34e-82	0.755902	0.6	0.18	1.92e-78
il21r.1	2.97e-84	0.749654	0.605	0.185	4.25e-80
abi3a	2.69e-61	0.748682	0.668	0.296	3.84e-57
bsg	1.62e-52	0.744232	0.82	0.521	2.31e-48
jdp2b	5.66e-20	0.743864	0.916	0.827	8.1e-16
grn1	1.64e-55	0.74152	0.815	0.393	2.35e-51
zgc:103700	1.15e-58	0.727245	1	0.77	1.64e-54
si:ch211-113g11.6	2.23e-154	0.721293	0.37	0.021	3.19e-150
pfkfb3	2.28e-75	0.719296	0.506	0.131	3.26e-71
hcst	7.38e-83	0.712281	0.58	0.164	1.06e-78
fcer1g	7.83e-61	0.708762	0.77	0.375	1.12e-56
CABZ01111959.1	6.95e-88	0.703629	0.539	0.136	9.94e-84
BX004816.2	3.39e-11	0.695724	0.435	0.309	4.84e-07
si:busm1-57f23.1	1.51e-135	0.693179	0.433	0.044	2.16e-131
iqsec1b	6.88e-183	0.689651	0.425	0.023	9.85e-179
mical3a	1.15e-179	0.683505	0.408	0.02	1.64e-175
dock10	2.98e-67	0.676321	0.613	0.222	4.26e-63
slc12a2	1.03e-74	0.67226	0.552	0.163	1.47e-70
c1qtnf5	8.24e-163	0.671355	0.433	0.031	1.18e-158
insig1	4.31e-47	0.670772	0.501	0.19	6.17e-43
hcls1	1.15e-42	0.668055	0.732	0.439	1.65e-38
wipf1a	8.43e-54	0.667094	0.62	0.274	1.21e-49
tiam1a	8.34e-138	0.666567	0.438	0.046	1.19e-133
ero1b	1.91e-71	0.662902	0.527	0.158	2.73e-67
prkcba	2.84e-112	0.653317	0.443	0.065	4.06e-108
arpc5b	2.12e-61	0.652648	0.641	0.249	3.03e-57
rab8b	2.37e-47	0.651248	0.615	0.295	3.39e-43
arl6ip1	1.11e-44	0.640763	0.752	0.454	1.59e-40
irf2	1.62e-55	0.633287	0.592	0.234	2.32e-51
si:dkey-216e24.9	4.75e-65	0.633255	0.494	0.147	6.8e-61
tsc22d3	3.2e-23	0.623109	0.914	0.728	4.58e-19
tpm3	7.79e-43	0.610491	0.638	0.34	1.11e-38
marcksl1a	5.75e-48	0.59891	0.972	0.716	8.22e-44
si:busm1-266f07.2	5.35e-55	0.598791	1	0.85	7.65e-51
sall3a	1.31e-77	0.594589	0.43	0.092	1.87e-73
si:dkey-33c9.6	9.03e-122	0.592385	0.43	0.054	1.29e-117
adrb2a	4.72e-65	0.591833	0.423	0.107	6.75e-61
pik3r3a	3.72e-48	0.590935	0.506	0.194	5.32e-44
fgf12a	1.84e-171	0.590156	0.342	0.01	2.63e-167
fgd4b	4.05e-56	0.588456	0.532	0.19	5.8e-52
hsp70.2	2.59e-38	0.586321	0.992	0.867	3.7e-34
nav3	2.13e-101	0.586231	0.405	0.059	3.04e-97
rap1b	5.1e-38	0.579881	0.729	0.449	7.29e-34
tmem178	5.95e-159	0.579317	0.362	0.017	8.51e-155
tram1	1.44e-43	0.577712	0.565	0.246	2.07e-39
spag1a	1.22e-89	0.577691	0.435	0.081	1.75e-85
ttyh3a	1.12e-51	0.570187	0.532	0.193	1.6e-47
psap	1.03e-47	0.564124	0.942	0.546	1.48e-43
tbc1d10b	5.78e-81	0.563127	0.418	0.083	8.27e-77
spi1b	1.12e-42	0.563031	0.706	0.345	1.6e-38
il12ba	3.11e-135	0.561943	0.268	0.008	4.45e-131
rarres3l	4.65e-58	0.561831	0.385	0.094	6.66e-54
crim1	6.03e-147	0.560561	0.365	0.022	8.63e-143
ch25h	2.6e-33	0.558953	0.663	0.347	3.72e-29
dennd2db	1.54e-103	0.558364	0.385	0.05	2.2e-99
si:dkey-148a17.5	1.85e-76	0.558016	0.415	0.086	2.64e-72
mhc1zba	8.13e-43	0.554773	0.985	0.918	1.16e-38
jun	9.67e-28	0.554252	0.929	0.762	1.38e-23
nrxn2a	6.48e-165	0.552605	0.311	0.007	9.26e-161
specc1	2.73e-76	0.549812	0.392	0.078	3.9e-72
si:ch211-269k10.5	1.94e-62	0.547758	0.413	0.106	2.78e-58
bcam	5.93e-69	0.546108	0.408	0.091	8.48e-65
arvcfb	5.35e-148	0.545653	0.349	0.018	7.65e-144
sash1a	3.54e-92	0.545515	0.39	0.06	5.06e-88
2008-03-01	1.18e-51	0.544605	0.478	0.162	1.68e-47
hmha1a	3.45e-69	0.544481	0.441	0.11	4.94e-65
slc12a7b	5.6e-137	0.54267	0.367	0.027	8.01e-133
tiparp	7.27e-33	0.538202	0.327	0.113	1.04e-28
ctss1	1.18e-123	0.536853	0.382	0.037	1.69e-119
ccng2	7.21e-17	0.535935	0.529	0.324	1.03e-12
lygl1	1.06e-59	0.53545	0.909	0.447	1.51e-55
skilb	4.98e-59	0.53207	0.395	0.101	7.12e-55
sema4ab	6.96e-54	0.531979	0.446	0.137	9.96e-50
sgk3	1.58e-62	0.528589	0.461	0.128	2.26e-58
s1pr1	6.77e-110	0.527005	0.296	0.022	9.68e-106
lyn	2.6e-53	0.522643	0.461	0.146	3.72e-49
cdk6	1.86e-68	0.521807	0.382	0.082	2.67e-64
nme2b.2	1.73e-74	0.521724	0.433	0.092	2.48e-70
si:ch211-153b23.7	7.96e-43	0.520527	0.491	0.189	1.14e-38
anxa11b	4.42e-36	0.515829	0.646	0.357	6.33e-32
hsp70.1	5.25e-22	0.515221	0.952	0.796	7.52e-18
2012-09-01	8e-34	0.511907	0.577	0.294	1.14e-29
ncf1	7.92e-25	0.511014	0.458	0.227	1.13e-20
cdc42l	4.86e-33	0.508203	0.886	0.696	6.94e-29
hipk3b	2.05e-73	0.506206	0.311	0.049	2.93e-69
CR385050.1	5.84e-66	0.50455	0.4	0.09	8.36e-62
ptprc	1.61e-26	0.500312	0.722	0.499	2.3e-22
UBB	8.34e-25	0.493177	0.975	0.896	1.19e-20
si:ch1073-190k2.1	1.54e-54	0.491051	0.263	0.046	2.2e-50
atp2b1a	6.83e-47	0.49044	0.423	0.141	9.77e-43
mcl1a	2.1e-20	0.487928	0.987	0.958	3e-16
gng2	3.91e-39	0.487411	0.405	0.147	5.59e-35
znf385a	9.98e-161	0.485986	0.314	0.008	1.43e-156
hspb1	1.34e-10	0.483592	0.403	0.258	1.91e-06
hsp70.3	2.05e-26	0.482311	0.997	0.94	2.94e-22
st3gal3a	2.67e-57	0.47949	0.415	0.114	3.82e-53
batf3	6.74e-42	0.473189	0.438	0.155	9.63e-38
tlr1	1.17e-53	0.472911	0.359	0.089	1.67e-49
dok2	6.95e-38	0.472438	0.403	0.152	9.95e-34
asap2b	1.1e-96	0.47158	0.329	0.037	1.57e-92
mknk2b	7.83e-21	0.471455	0.828	0.614	1.12e-16
mhc2b	1.46e-44	0.47108	0.942	0.567	2.08e-40
si:dkeyp-117b11.1	2.04e-98	0.469522	0.319	0.033	2.92e-94
her9	5.24e-25	0.467864	0.154	0.035	7.49e-21
tmem59	8.63e-32	0.466217	0.62	0.32	1.23e-27
adgre10	6.59e-16	0.465763	0.752	0.549	9.43e-12
si:ch211-171h4.6	4.47e-45	0.465561	0.37	0.109	6.4e-41
cyba	1.17e-31	0.465503	0.608	0.31	1.67e-27
tanc2a	8.48e-83	0.463196	0.316	0.042	1.21e-78
bahcc1b	4.45e-90	0.461923	0.309	0.035	6.37e-86
si:dkey-18p12.4	8.02e-35	0.460937	0.342	0.116	1.15e-30
nrd1a	2.85e-58	0.458152	0.319	0.065	4.07e-54
rbm47	8.74e-62	0.456843	0.375	0.085	1.25e-57
phf20b	1.67e-38	0.455465	0.438	0.168	2.38e-34
zgc:152863	1.24e-22	0.452908	0.539	0.301	1.77e-18
CABZ01078737.1	1.17e-41	0.451495	0.509	0.195	1.68e-37
kcnq5b	3e-73	0.450554	0.334	0.056	4.29e-69
smox	1.35e-35	0.448364	0.661	0.312	1.93e-31
ube2e2	7.95e-44	0.444117	0.425	0.146	1.14e-39
fmnl1a	5.61e-30	0.443399	0.494	0.238	8.03e-26
zgc:194312	1.34e-38	0.442289	0.415	0.15	1.92e-34
ncam1a	1.45e-118	0.434869	0.233	0.006	2.07e-114
hsp90aa1.2	1.02e-20	0.432163	1	0.979	1.46e-16
itgae.2	2.95e-23	0.430477	0.704	0.451	4.22e-19
CMKLR1 (1 of many)	4.68e-93	0.429377	0.273	0.023	6.7e-89
gm2a	1.13e-32	0.428494	0.78	0.432	1.62e-28
tnfrsf11b	5.5e-26	0.4267	0.177	0.043	7.87e-22
ptpn18	3.81e-60	0.425176	0.296	0.054	5.45e-56
atf4a	1.17e-16	0.424942	0.706	0.551	1.67e-12
si:ch211-198c19.1	3e-44	0.424146	0.342	0.095	4.29e-40
gnaia	1.74e-20	0.423726	0.428	0.224	2.49e-16
yrk	1.41e-41	0.421712	0.423	0.147	2.01e-37
ptpn6	6.12e-24	0.421281	0.704	0.458	8.76e-20
pik3ap1	4.23e-42	0.420743	0.397	0.129	6.06e-38
mfng	2.71e-20	0.419056	0.643	0.433	3.87e-16
plcb3	2.83e-46	0.418378	0.314	0.078	4.05e-42
sh3kbp1	2.91e-29	0.413899	0.451	0.206	4.16e-25
sult4a1	7.53e-88	0.413795	0.268	0.025	1.08e-83
cd74b	8.03e-35	0.413335	1	0.875	1.15e-30
hck	1.64e-44	0.41322	0.382	0.116	2.34e-40
slc9a3r1a	1.26e-38	0.413053	0.392	0.136	1.81e-34
tep1	1.28e-67	0.410767	0.284	0.043	1.83e-63
mrtfab	2.68e-37	0.410235	0.403	0.146	3.83e-33
atp10d	2.5e-58	0.409005	0.284	0.05	3.57e-54
zgc:64051	1.16e-28	0.40666	0.959	0.802	1.65e-24
si:dkey-33i11.9	6.41e-42	0.406013	0.678	0.29	9.17e-38
lmbrd1	3.86e-44	0.405624	0.334	0.092	5.53e-40
kif21b	9.87e-49	0.402604	0.329	0.082	1.41e-44
net1	2.72e-45	0.400855	0.238	0.046	3.88e-41
stk35	1.24e-27	0.400745	0.392	0.171	1.77e-23
mylipb	2.62e-77	0.396321	0.301	0.04	3.75e-73
huwe1	1.68e-35	0.392987	0.342	0.114	2.4e-31
akt3a	3.19e-57	0.39285	0.258	0.042	4.56e-53
arhgap17b	2.24e-68	0.389883	0.289	0.043	3.21e-64
sema6e	1.99e-104	0.389619	0.238	0.011	2.84e-100
si:ch211-203d1.3	7.31e-43	0.389252	0.322	0.089	1.05e-38
capza1b	1.16e-19	0.389059	0.618	0.414	1.66e-15
tnfrsf21	9.34e-72	0.387995	0.273	0.036	1.34e-67
zmp:0000001139	1.32e-34	0.387001	0.316	0.101	1.89e-30
zgc:92107	1.07e-48	0.384898	0.286	0.062	1.53e-44
zgc:174863	3.82e-30	0.384262	0.549	0.267	5.46e-26
si:dkey-102c8.3	1.34e-48	0.384249	0.301	0.068	1.91e-44
kctd12.2	4.73e-21	0.382888	0.6	0.343	6.77e-17
arhgap4b	1.66e-43	0.381588	0.316	0.084	2.37e-39
slc43a3b	7.76e-60	0.380517	0.425	0.107	1.11e-55
dbnlb	3.15e-21	0.379058	0.397	0.197	4.5e-17
socs1a	6.21e-07	0.3764	0.266	0.174	0.00888442
erbin	7.36e-29	0.376282	0.324	0.12	1.05e-24
fgd4a	9.96e-71	0.375749	0.261	0.033	1.43e-66
osbpl9	8.65e-33	0.373089	0.382	0.144	1.24e-28
plpp3	3.35e-94	0.372627	0.23	0.013	4.79e-90
sall3b	1.11e-76	0.37073	0.185	0.01	1.59e-72
si:dkey-253d23.3	3.96e-37	0.370233	0.319	0.094	5.67e-33
fbxo34	3.28e-54	0.369301	0.316	0.068	4.7e-50
ddx5	3.43e-19	0.366981	0.939	0.744	4.9e-15
plxnb1b	2.64e-82	0.365166	0.251	0.023	3.78e-78
plek	3.99e-24	0.364733	0.496	0.252	5.71e-20
si:dkey-148a17.6	2.42e-38	0.363942	0.347	0.106	3.45e-34
afap1l2	1.01e-42	0.363004	0.329	0.091	1.45e-38
si:dkey-253i9.4	1.09e-49	0.362477	0.286	0.061	1.55e-45
stk17b	6.64e-27	0.361057	0.41	0.181	9.49e-23
zswim5	1.46e-24	0.357602	0.38	0.167	2.09e-20
myt1b	2.99e-71	0.357347	0.251	0.029	4.27e-67
znf609a	2e-34	0.355641	0.284	0.084	2.86e-30
irf2bp2b	1.13e-20	0.353538	0.387	0.19	1.61e-16
cntfr	6.67e-88	0.352091	0.223	0.014	9.55e-84
frmd4bb	1.62e-84	0.351579	0.213	0.013	2.32e-80
dusp1	6.18e-13	0.350656	0.787	0.585	8.84e-09
pim1	1.07e-12	0.348525	0.486	0.31	1.54e-08
si:ch211-196l7.4	2.52e-14	0.348263	0.876	0.684	3.6e-10
msi1	2.54e-69	0.348092	0.263	0.034	3.64e-65
si:dkey-85k7.12	8.08e-89	0.347999	0.223	0.013	1.16e-84
cyfip1	3.12e-29	0.34762	0.408	0.168	4.46e-25
mras	6.86e-40	0.344981	0.304	0.083	9.81e-36
emc7	2.39e-31	0.344811	0.375	0.142	3.42e-27
ncor2	1.28e-24	0.341352	0.332	0.135	1.83e-20
si:ch73-95l15.5	6.63e-32	0.341084	0.268	0.08	9.48e-28
pik3cd	5.58e-19	0.340374	0.337	0.163	7.98e-15
tmem106c	1.6e-34	0.34026	0.284	0.082	2.29e-30
dnajb1b	5.74e-17	0.339475	0.995	0.957	8.21e-13
serinc5	1.74e-37	0.339178	0.278	0.074	2.48e-33
ipcef1	5.2e-22	0.339119	0.387	0.183	7.44e-18
fam102ab	1.6e-37	0.338667	0.322	0.095	2.29e-33
cox6a2	2.02e-46	0.337911	0.251	0.048	2.88e-42
klf12a	1.03e-27	0.337294	0.347	0.135	1.48e-23
bik	6.4e-70	0.336173	0.19	0.014	9.16e-66
PAQR9	1.47e-22	0.333025	0.296	0.117	2.1e-18
ryr3	3.07e-67	0.331556	0.238	0.027	4.38e-63
grb2b	2.59e-14	0.329153	0.435	0.27	3.7e-10
cxcl11.5	9.53e-51	0.327301	0.458	0.137	1.36e-46
arhgap29b	9.51e-29	0.327183	0.332	0.122	1.36e-24
pdxka	1.8e-31	0.326096	0.256	0.072	2.57e-27
prokr1a	1.41e-23	0.324422	0.357	0.149	2.01e-19
wasf2	1.61e-19	0.323125	0.418	0.217	2.31e-15
ctnnd2a	8.16e-70	0.321826	0.205	0.017	1.17e-65
arap3	8.5e-38	0.320524	0.241	0.056	1.22e-33
susd6	2e-22	0.317273	0.354	0.159	2.86e-18
dab2ipa	4.64e-76	0.316155	0.208	0.015	6.63e-72
slc35g2a	5.95e-46	0.315279	0.157	0.017	8.51e-42
myo1f	4.81e-25	0.314598	0.266	0.092	6.88e-21
si:dkey-9c18.3	1.89e-73	0.309534	0.195	0.013	2.71e-69
msi2a	3.8e-44	0.309023	0.187	0.028	5.43e-40
cnot6a	1.37e-30	0.307106	0.256	0.075	1.96e-26
kif1b	6.66e-24	0.3059	0.311	0.123	9.53e-20
si:ch73-122g19.1	4.92e-86	0.304181	0.159	0.003	7.04e-82
tagapb	3.05e-11	0.303342	0.547	0.37	4.36e-07
bcl2l10	1.5e-21	0.303224	0.663	0.405	2.14e-17
arpc1b	1.38e-20	0.303149	0.962	0.848	1.97e-16
lpar6b	1.11e-37	0.302316	0.185	0.033	1.59e-33
gria4b	4.48e-92	0.300561	0.19	0.006	6.41e-88
agpat3	9.23e-34	0.299838	0.251	0.066	1.32e-29
cfl1	1.28e-18	0.29874	0.997	0.932	1.83e-14
si:dkey-22o12.2	1.1e-51	0.298453	0.213	0.03	1.58e-47
tlr8a	3.45e-49	0.298244	0.197	0.027	4.93e-45
gabarapb	4.31e-11	0.2982	0.661	0.528	6.17e-07
bpifcl	5.94e-26	0.297709	0.203	0.056	8.49e-22
mycbp2	2.86e-14	0.297242	0.365	0.204	4.09e-10
ids	5.22e-45	0.297161	0.243	0.048	7.47e-41
cd209	3.19e-45	0.296591	0.192	0.029	4.57e-41
BX323022.1	5.14e-64	0.295202	0.195	0.018	7.35e-60
ccnd1	3.58e-17	0.294972	0.276	0.122	5.12e-13
grn2	3.19e-14	0.2936	0.256	0.116	4.57e-10
rhogb	6.04e-17	0.293353	0.43	0.237	8.65e-13
csnk1g2b	1.28e-21	0.291524	0.316	0.132	1.84e-17
arhgdia	7.97e-09	0.290326	0.628	0.505	0.000113975
fnbp1l	5.59e-54	0.2901	0.208	0.027	7.99e-50
CABZ01080702.1	5.89e-47	0.287837	0.22	0.037	8.42e-43
unc93b1	1.33e-24	0.287513	0.314	0.12	1.9e-20
gpx1a	3.1e-17	0.287265	0.625	0.402	4.43e-13
celf2	9.72e-14	0.287147	0.375	0.212	1.39e-09
blnk	2.54e-33	0.286622	0.225	0.055	3.64e-29
kdm2bb	1.26e-28	0.283071	0.258	0.079	1.8e-24
fam49al	2.02e-19	0.281245	0.342	0.155	2.89e-15
rap1gap2a	8.8e-65	0.281179	0.182	0.014	1.26e-60
zgc:101810	9.85e-41	0.280793	0.246	0.053	1.41e-36
ckbb	6.81e-20	0.280216	0.628	0.345	9.74e-16
rpa2	3.99e-17	0.279953	0.278	0.121	5.71e-13
bhlhe40	1.55e-15	0.27989	0.6	0.392	2.21e-11
myo18ab	4.26e-15	0.279748	0.332	0.169	6.09e-11
bcl6ab	7.1e-29	0.278517	0.253	0.076	1.02e-24
btk	9.24e-23	0.278405	0.281	0.107	1.32e-18
zgc:152774	1.33e-13	0.277544	0.385	0.224	1.9e-09
gse1	1.2e-18	0.277415	0.311	0.14	1.72e-14
pag1	4.28e-36	0.277255	0.203	0.041	6.12e-32
camk1b	1.41e-33	0.276834	0.233	0.058	2.02e-29
galnt1	1.02e-32	0.275668	0.205	0.047	1.47e-28
setx	2.14e-44	0.274763	0.185	0.027	3.07e-40
syk	5.35e-17	0.272992	0.519	0.299	7.65e-13
osbpl2b	2.47e-25	0.272157	0.251	0.082	3.53e-21
mbnl3	1.54e-15	0.271774	0.327	0.166	2.2e-11
si:dkey-118j18.2	3.24e-21	0.271739	0.296	0.121	4.63e-17
ikzf1	7.13e-16	0.27076	0.347	0.18	1.02e-11
ywhag2	5.86e-20	0.268895	0.246	0.093	8.39e-16
timp2a	3.58e-48	0.267371	0.182	0.023	5.12e-44
plxna3	1.78e-65	0.267032	0.172	0.012	2.54e-61
zgc:173742	3.05e-51	0.266435	0.157	0.014	4.36e-47
tnfrsf1a	2.12e-16	0.266146	0.344	0.171	3.03e-12
arpc4	5.79e-11	0.265986	0.59	0.439	8.28e-07
capns1b	5.87e-15	0.265938	0.395	0.217	8.39e-11
ece2b	6.93e-14	0.265419	0.154	0.056	9.92e-10
snx22	1.28e-21	0.265084	0.241	0.085	1.84e-17
zgc:172090	3.17e-10	0.262788	0.238	0.124	4.53e-06
slc35f6	3.27e-19	0.262724	0.327	0.142	4.67e-15
zfp36l1b	2.87e-11	0.262597	0.233	0.115	4.1e-07
il21	4.92e-23	0.261608	0.129	0.026	7.04e-19
arhgdig	7.83e-12	0.261603	0.977	0.854	1.12e-07
cbx7a	5.61e-14	0.261196	0.228	0.1	8.02e-10
bin1b	1.14e-27	0.260769	0.21	0.057	1.62e-23
hsph1	2.06e-13	0.259764	0.344	0.186	2.95e-09
tpm1	2.97e-14	0.259182	0.322	0.169	4.25e-10
sntb1	4.33e-55	0.257826	0.175	0.017	6.2e-51
slc25a39	2.99e-41	0.255485	0.182	0.028	4.28e-37
ssbp3b	8.97e-29	0.255243	0.235	0.067	1.28e-24
CU929259.1	9.53e-13	0.253828	0.253	0.123	1.36e-08
mafgb	1.61e-33	0.253087	0.203	0.044	2.3e-29
gab1	8.36e-32	0.25305	0.253	0.069	1.2e-27
si:ch211-15b10.6	9.25e-17	0.252467	0.334	0.158	1.32e-12
ctsk	2.55e-15	0.251099	0.438	0.233	3.65e-11
zgc:153733	3.29e-25	0.250808	0.233	0.072	4.71e-21
rin2	1.28e-24	0.250713	0.22	0.067	1.83e-20

## Sheet: MarkersDC_sign_up_hs orthologs
	initial_alias	ortholog_name
	SIGLEC15L	SIGLEC15
	CCL19A.1	CCL19
	CHL1A	CHL1
	RGS2	RGS2
	HEPACAM2	HEPACAM2
	ID2A	ID2
	PLEKHF1	PLEKHF1
	CABZ01080568.1	NUP160
	SOCS3A	SOCS3
	NCK1A	NCK1
	ZGC:162730	ZFP36L1
	ZGC:171686	N/A
	SI:DKEY-23A13.11	FCRL5
	EHBP1L1B	EHBP1L1
	IL12RB2L	IL31RA
	MPEG1.1	MPEG1
	ATF3	ATF3
	ARHGAP12B	ARHGAP12
	IRF8	IRF8
	MCL1B	MCL1
	HSP70L	HSPA2
	PPP1R15A	PPP1R15A
	PLXNC1	PLXNC1
	FYBB	FYB1
	CMTM7	CMTM7
	BX897691.1	N/A
	ACTB1	ACTB
	PTPRJA	PTPRJ
	DEF6A	DEF6
	SI:DKEYP-94G1.1	N/A
	PIGRL4.2	FCAMR
	SI:DKEY-238D18.5	N/A
	BX927333.1	CLMP
	SPOCK3	SPOCK3
	PLEKHO2	PLEKHO2
	GPATCH8	GPATCH8
	FKBP5	FKBP5
	CBLB	CBLB
	DDIT4	DDIT4
	CYTH4A	CYTH4
	FES	FES
	TCIMA	TCIM
	CITED4B	CITED4
	GLB1L	GLB1L
	SLC15A4	SLC15A4
	ACTN1	ACTN1
	CNN3A	CNN3
	ARHGEF15	ARHGEF15
	EPDL1	EPDR1
	SI:DKEY-56M19.5	N/A
	JUNBA	JUNB
	AIF1L	AIF1L
	RAC2	RAC2
	SI:CH211-79K12.1	N/A
	CADM4	CADM4
	UBB	UBB
	FAM49BA	CYRIB
	CRYBG1A	CRYBG1
	KDM2BA	KDM2B
	KAZALD3	KAZALD1
	LCP1	LCP1
	KLF6A	KLF6
	FLT3	FLT3
	DAPP1	DAPP1
	FOSAB	FOS
	ANK2B	ANK2
	GADD45BB	GADD45B
	RAB5AA	RAB5A
	DESI2	DESI2
	IRAK3	IRAK3
	KRT18B	KRT18
	SI:CH211-215E19.6	FCAMR
	TOP1L	TOP1
	DUSP6	DUSP6
	XCR1A.1	XCR1
	SRGAP2	SRGAP2
	IL21R.1	IL2RB
	ABI3A	ABI1
	BSG	BSG
	JDP2B	JDP2
	GRN1	GRN
mhc2dhb	ZGC:103700	HLA-DOB	mhc2dhb
	SI:CH211-113G11.6	N/A
	PFKFB3	PFKFB3
	HCST	HCST
	FCER1G	FCER1G
	CABZ01111959.1	SEMA7A
	BX004816.2	N/A
	SI:BUSM1-57F23.1	CST1
	IQSEC1B	IQSEC1
	MICAL3A	MICAL3
	DOCK10	DOCK10
	SLC12A2	SLC12A2
	C1QTNF5	C1QTNF5
	INSIG1	INSIG1
	HCLS1	HCLS1
	WIPF1A	WIPF1
	TIAM1A	TIAM1
	ERO1B	ERO1B
	PRKCBA	PRKCB
	ARPC5B	ARPC5
	RAB8B	RAB8B
	ARL6IP1	ARL6IP1
	IRF2	IRF2
	SI:DKEY-216E24.9	N/A
	TSC22D3	TSC22D3
	TPM3	TPM3
	MARCKSL1A	MARCKSL1
	SALL3A	SALL3
	SI:DKEY-33C9.6	N/A
	ADRB2A	ADRB2
	PIK3R3A	PIK3R3
	FGF12A	FGF12
	FGD4B	FGD4
	HSP70.2	HSPA1L
	NAV3	NAV3
	RAP1B	RAP1B
	TMEM178	TMEM178A
	TRAM1	TRAM1
	SPAG1A	SPAG1
	TTYH3A	TTYH3
	PSAP	PSAP
	TBC1D10B	TBC1D10B
	SPI1B	SPI1
	IL12BA	IL12B
	RARRES3L	PLAAT4
	CRIM1	CRIM1
	CH25H	CH25H
	DENND2DB	DENND2D
	SI:DKEY-148A17.5	N/A
	MHC1ZBA	HLA-A
	JUN	JUN
	NRXN2A	NRXN2
	SPECC1	SPECC1
	SI:CH211-269K10.5	N/A
	BCAM	BCAM
	ARVCFB	ARVCF
	SASH1A	SASH1
	MARCHF8	MARCHF8
arhgap45a	HMHA1A	ARHGAP45	arhgap45a
	SLC12A7B	SLC12A7
	TIPARP	TIPARP
	CTSS1	CTSS
	LYGL1	LYG2
	SKILB	SKIL
	SEMA4AB	SEMA4A
	SGK3	SGK3
	S1PR1	S1PR1
	LYN	LYN
	CDK6	CDK6
	NME2B.2	NME1
	SI:CH211-153B23.7	TNIP3
	ANXA11B	ANXA11
	HSP70.1	HSPA1A
	SEPT12	SEPTIN12
	NCF1	NCF1
	CDC42L	CDC42
	HIPK3B	HIPK3
	CR385050.1	N/A
	PTPRC	PTPRC
	UBB	UBB
	SI:CH1073-190K2.1	N/A
	ATP2B1A	ATP2B1
	MCL1A	MCL1
	ZNF385A	ZNF385A
	HSPB1	HSPB1
	HSP70.3	HSPA1L
	ST3GAL3A	ST3GAL3
	BATF3	BATF3
	TLR1	TLR6
	DOK2	DOK2
	ASAP2B	ASAP2
	MHC2B	HLA-DOB
	SI:DKEYP-117B11.1	SH2D6
	HER9	HES4
	TMEM59	TMEM59
	ADGRE10	N/A
	SI:CH211-171H4.6	N/A
	CYBA	CYBA
	TANC2A	TANC2
	BAHCC1B	BAHCC1
	SI:DKEY-18P12.4	TRIM64
	NRD1A	NRDC
	RBM47	RBM47
	PHF20B	PHF20
	ZGC:152863	SUSD6
	CABZ01078737.1	N/A
	KCNQ5B	KCNQ5
	SMOX	SMOX
	UBE2E2	UBE2E2
	FMNL1A	FMNL1
	ZGC:194312	N/A
	NCAM1A	NCAM1
	HSP90AA1.2	HSP90AB1
	ITGAE.2	ITGAE
	CMKLR1 (1 of many)	CMKLR1
	GM2A	GM2A
	TNFRSF11B	TNFRSF11B
	PTPN18	PTPN18
	ATF4A	ATF4
	SI:CH211-198C19.1	N/A
	GNAIA	GNAI1
	YRK	FGR
	PTPN6	PTPN6
	PIK3AP1	PIK3AP1
	MFNG	MFNG
	PLCB3	PLCB3
	SH3KBP1	SH3KBP1
	SULT4A1	SULT4A1
	CD74B	CD74
	HCK	HCK
	SLC9A3R1A	SLC9A3R1
	TEP1	TEP1
	MRTFAB	MRTFA
	ATP10D	ATP10D
	ZGC:64051	CD53
	SI:DKEY-33I11.9	N/A
	LMBRD1	LMBRD1
	KIF21B	KIF21B
	NET1	NET1
	STK35	STK35
	MYLIPB	MYLIP
	HUWE1	HUWE1
	AKT3A	AKT3
	ARHGAP17B	ARHGAP17
	SEMA6E	SEMA6C
	SI:CH211-203D1.3	SSH3
	CAPZA1B	CAPZA1
	TNFRSF21	TNFRSF21
	ZMP:0000001139	N/A
	ZGC:92107	N/A
	ZGC:174863	CADM1
	SI:DKEY-102C8.3	N/A
	KCTD12.2	KCTD12
	ARHGAP4B	ARHGAP4
	SLC43A3B	SLC43A3
	DBNLB	DBNL
	SOCS1A	SOCS1
	ERBIN	ERBIN
	FGD4A	FGD4
	OSBPL9	OSBPL9
	PLPP3	PLPP3
	SALL3B	SALL3
	SI:DKEY-253D23.3	N/A
	FBXO34	FBXO34
	DDX5	DDX5
	PLXNB1B	PLXNB1
	PLEK	PLEK
	SI:DKEY-148A17.6	N/A
	AFAP1L2	AFAP1L2
	SI:DKEY-253I9.4	RAPGEF2
	STK17B	STK17B
	ZSWIM5	ZSWIM5
	MYT1B	MYT1
	ZNF609A	ZNF609
	IRF2BP2B	IRF2BP2
	CNTFR	CNTFR
	FRMD4BB	FRMD4B
	DUSP1	DUSP1
	PIM1	PIM1
	SI:CH211-196L7.4	N/A
	MSI1	MSI1
	SI:DKEY-85K7.12	URGCP
	CYFIP1	CYFIP1
	MRAS	MRAS
	EMC7	EMC7
	NCOR2	NCOR2
	SI:CH73-95L15.5	PDE4DIP
	PIK3CD	PIK3CD
	TMEM106C	TMEM106C
	DNAJB1B	DNAJB1
	DNAJB1B	DNAJB8
	SERINC5	SERINC5
	IPCEF1	IPCEF1
	FAM102AB	FAM102A
	COX6A2	COX6A1
	KLF12A	KLF12
	BIK	BIK
	PAQR9	PAQR9
	RYR3	RYR3
	GRB2B	GRB2
	CXCL11.5	CXCL9
	ARHGAP29B	ARHGAP29
	PDXKA	PDXK
	PROKR1A	PROKR1
	WASF2	WASF2
	CTNND2A	CTNND2
	ARAP3	ARAP3
	SUSD6	SUSD6
	DAB2IPA	DAB2IP
	SLC35G2A	SLC35G2
	MYO1F	MYO1F
	SI:DKEY-9C18.3	N/A
	MSI2A	MSI2
	CNOT6A	CNOT6
	KIF1B	KIF1B
	SI:CH73-122G19.1	N/A
	TAGAPB	TAGAP
	BCL2L10	BCL2L10
	ARPC1B	ARPC1B
	LPAR6B	LPAR6
	GRIA4B	GRIA4
	AGPAT3	AGPAT3
	CFL1	CFL1
	SI:DKEY-22O12.2	C3orf70
	TLR8A	TLR8
	GABARAPB	GABARAP
	BPIFCL	N/A
	MYCBP2	MYCBP2
	IDS	IDS
	CD209	CD209
	BX323022.1	N/A
	CCND1	CCND1
	GRN2	GRN
	RHOGB	RHOG
	CSNK1G2B	CSNK1G2
	ARHGDIA	ARHGDIA
	FNBP1L	FNBP1L
	CABZ01080702.1	N/A
	UNC93B1	UNC93B1
	GPX1A	GPX1
	CELF2	CELF2
	BLNK	BLNK
	KDM2BB	KDM2B
	FAM49AL	N/A
	RAP1GAP2A	RAP1GAP2
	ZGC:101810	N/A
	CKBB	CKB
	RPA2	RPA2
	BHLHE40	BHLHE40
	MYO18AB	MYO18A
	BCL6AB	BCL6
	BTK	BTK
	ZGC:152774	MORC4
	GSE1	GSE1
	PAG1	N/A
	CAMK1B	CAMK1
	GALNT1	GALNT1
	SETX	SETX
	SYK	SYK
	OSBPL2B	OSBPL2
	MBNL3	MBNL3
	SI:DKEY-118J18.2	N/A
	IKZF1	IKZF1
	YWHAG2	YWHAG
	TIMP2A	TIMP2
	PLXNA3	PLXNA3
	ZGC:173742	TOP1MT
	TNFRSF1A	TNFRSF1A
	ARPC4	ARPC4
	CAPNS1B	CAPNS1
	ECE2B	ECE2
	SNX22	SNX22
	ZGC:172090	N/A
	SLC35F6	SLC35F6
	ZFP36L1B	ZFP36L1
	IL21	IL21
	ARHGDIG	ARHGDIG
	CBX7A	CBX7
	BIN1B	BIN1
	HSPH1	HSPH1
	TPM1	TPM1
	SNTB1	SNTB1
	SLC25A39	SLC25A39
	SSBP3B	SSBP3
	CU929259.1	MYH7
	MAFGB	MAFG
	GAB1	GAB1
	SI:CH211-15B10.6	TIFA
	CTSK	CTSK
	ZGC:153733	PHETA2
mhc2daa	SI:BUSM1-266F07.2	N/A	mhc2daa
	GNG2	GNG2
	MKNK2B	MKNK2

## Sheet: DC_Enrichr_list_hs_orthologs
SIGLEC15
CCL19
CHL1
RGS2
HEPACAM2
ID2
PLEKHF1
NUP160
SOCS3
NCK1
ZFP36L1
FCRL5
EHBP1L1
IL31RA
MPEG1
ATF3
ARHGAP12
IRF8
MCL1
HSPA2
PPP1R15A
PLXNC1
FYB1
CMTM7
ACTB
PTPRJ
DEF6
FCAMR
CLMP
SPOCK3
PLEKHO2
GPATCH8
FKBP5
CBLB
DDIT4
CYTH4
FES
TCIM
CITED4
GLB1L
SLC15A4
ACTN1
CNN3
ARHGEF15
EPDR1
JUNB
AIF1L
RAC2
CADM4
UBB
CYRIB
CRYBG1
KDM2B
KAZALD1
LCP1
KLF6
FLT3
DAPP1
FOS
ANK2
GADD45B
RAB5A
DESI2
IRAK3
KRT18
FCAMR
TOP1
DUSP6
XCR1
SRGAP2
IL2RB
ABI1
BSG
JDP2
GRN
HLA-DOB
PFKFB3
HCST
FCER1G
SEMA7A
CST1
IQSEC1
MICAL3
DOCK10
SLC12A2
C1QTNF5
INSIG1
HCLS1
WIPF1
TIAM1
ERO1B
PRKCB
ARPC5
RAB8B
ARL6IP1
IRF2
TSC22D3
TPM3
MARCKSL1
SALL3
ADRB2
PIK3R3
FGF12
FGD4
HSPA1L
NAV3
RAP1B
TMEM178A
TRAM1
SPAG1
TTYH3
PSAP
TBC1D10B
SPI1
IL12B
PLAAT4
CRIM1
CH25H
DENND2D
HLA-A
JUN
NRXN2
SPECC1
BCAM
ARVCF
SASH1
MARCHF8
ARHGAP45
SLC12A7
TIPARP
CTSS
LYG2
SKIL
SEMA4A
SGK3
S1PR1
LYN
CDK6
NME1
TNIP3
ANXA11
HSPA1A
SEPTIN12
NCF1
CDC42
HIPK3
PTPRC
UBB
ATP2B1
MCL1
ZNF385A
HSPB1
HSPA1L
ST3GAL3
BATF3
TLR6
DOK2
ASAP2
HLA-DOB
SH2D6
HES4
TMEM59
CYBA
TANC2
BAHCC1
TRIM64
NRDC
RBM47
PHF20
SUSD6
KCNQ5
SMOX
UBE2E2
FMNL1
NCAM1
HSP90AB1
ITGAE
CMKLR1
GM2A
TNFRSF11B
PTPN18
ATF4
GNAI1
FGR
PTPN6
PIK3AP1
MFNG
PLCB3
SH3KBP1
SULT4A1
CD74
HCK
SLC9A3R1
TEP1
MRTFA
ATP10D
CD53
LMBRD1
KIF21B
NET1
STK35
MYLIP
HUWE1
AKT3
ARHGAP17
SEMA6C
SSH3
CAPZA1
TNFRSF21
CADM1
KCTD12
ARHGAP4
SLC43A3
DBNL
SOCS1
ERBIN
FGD4
OSBPL9
PLPP3
SALL3
FBXO34
DDX5
PLXNB1
PLEK
AFAP1L2
RAPGEF2
STK17B
ZSWIM5
MYT1
ZNF609
IRF2BP2
CNTFR
FRMD4B
DUSP1
PIM1
MSI1
URGCP
CYFIP1
MRAS
EMC7
NCOR2
PDE4DIP
PIK3CD
TMEM106C
DNAJB1
DNAJB8
SERINC5
IPCEF1
FAM102A
COX6A1
KLF12
BIK
PAQR9
RYR3
GRB2
CXCL9
ARHGAP29
PDXK
PROKR1
WASF2
CTNND2
ARAP3
SUSD6
DAB2IP
SLC35G2
MYO1F
MSI2
CNOT6
KIF1B
TAGAP
BCL2L10
ARPC1B
LPAR6
GRIA4
AGPAT3
CFL1
C3orf70
TLR8
GABARAP
MYCBP2
IDS
CD209
CCND1
GRN
RHOG
CSNK1G2
ARHGDIA
FNBP1L
UNC93B1
GPX1
CELF2
BLNK
KDM2B
RAP1GAP2
CKB
RPA2
BHLHE40
MYO18A
BCL6
BTK
MORC4
GSE1
CAMK1
GALNT1
MOV10L1
SETX
SYK
OSBPL2
MBNL3
IKZF1
YWHAG
TIMP2
PLXNA3
TOP1MT
TNFRSF1A
ARPC4
CAPNS1
ECE2
SNX22
SLC35F6
ZFP36L1
IL21
ARHGDIG
CBX7
BIN1
HSPH1
TPM1
SNTB1
SLC25A39
SSBP3
MYH7
MAFG
GAB1
TIFA
CTSK
PHETA2
GNG2
MKNK2

## Sheet: DCEnrichmentAnalysisVisualizer
term	p-value	q-value
Dendritic Cells	2.73526e-16	4.21231e-14
Plasmacytoid Dendritic Cells	5.54543e-13	4.26998e-11
Langerhans Cells	1.75206e-11	8.99391e-10
Monocytes	9.21606e-11	3.54818e-09
Microglia	1.18732e-10	3.65693e-09
Eosinophils	2.87025e-10	7.36698e-09
Myeloid-derived Suppressor Cells	4.35032e-10	9.57071e-09
Macrophages	1.1621e-09	2.23705e-08
Platelets	2.5948e-09	4.43998e-08
B Cells Naive	3.78155e-09	5.82359e-08
Thymocytes	7.01314e-08	9.81839e-07
Megakaryocytes	9.85798e-08	1.26511e-06
B Cells Memory	1.39337e-07	1.6506e-06
Microfold Cells	1.53109e-07	1.6842e-06
T Follicular Helper Cells	2.50533e-07	2.57214e-06
Kupffer Cells	4.08073e-07	3.9277e-06
Neutrophils	1.24607e-06	1.12879e-05
Osteoclast Precursor Cells	1.44685e-06	1.23786e-05
Red Pulp Macrophages	1.90609e-06	1.54494e-05
Tuft Cells	2.47356e-06	1.90464e-05
Natural Killer T Cells	3.8095e-06	2.79364e-05
Alveolar Macrophages	5.70703e-06	3.99492e-05
B Cells	9.85067e-06	6.59566e-05
T Regulatory Cells	2.26172e-05	0.000145127
Osteoclasts	0.000132076	0.000813588
Hematopoietic Stem Cells	0.000173814	0.00102952
T Cells Naive	0.000271149	0.00154656
T Memory Cells	0.000345159	0.00189838
T Cells	0.000397663	0.00211173
Basophils	0.000480431	0.00246621
NK Cells	0.00114153	0.00567083
Mast Cells	0.00175959	0.00846805
Pancreatic Progenitor Cells	0.00271051	0.012649
Trophoblast Progenitor Cells	0.00692916	0.031385
Spermatozoa	0.00866993	0.0381477
Retinal Progenitor Cells	0.0102724	0.0439431
T Helper Cells	0.0110427	0.0459614
Chromaffin Cells	0.0151792	0.0615157
Erythroblasts	0.0163265	0.0644689
Luteal Cells	0.0169221	0.06515
Plasma Cells	0.0196096	0.0736554
Urothelial Cells	0.0301377	0.110505
Neuroblasts	0.0330714	0.118442
Astrocytes	0.041197	0.14419
Choroid Plexus Cells	0.0432267	0.147932
Sertoli Cells	0.0456933	0.150466
Dopaminergic Neurons	0.0459213	0.150466

## Sheet: DC_GO_pathways
ID	Term	Ontology Source	Term PValue	Term PValue Corrected with Bonferroni step down	Group PValue	Group PValue Corrected with Bonferroni step down	GOLevels	GOGroups	% Associated Genes	Nr. Genes	Associated Genes Found
GO:0008361	regulation of cell size	GO_BiologicalProcess-EBI-UniProt-GOA-ACAP-ARAP_05.04.2022_00h00	7.33562e-06	0.00397591	7.33562e-06	4.40137e-05	[5]	Group00	7.29167	14	[AKT3, ARHGAP4, CYFIP1, DBNL, HSP90AB1, PLEK, PLXNA3, RAP1GAP2, SEMA4A, SEMA6C, SEMA7A, SLC12A2, SLC12A7, SLC9A3R1]
GO:0038066	p38MAPK cascade	GO_BiologicalProcess-EBI-UniProt-GOA-ACAP-ARAP_05.04.2022_00h00	7.22854e-05	0.0341187	7.22854e-05	0.000216856	[6, 7, 8]	Group01	11.8644	7	[DAB2IP, DUSP1, GADD45B, NCF1, SASH1, SPI1, ZFP36L1]
GO:0038084	vascular endothelial growth factor signaling pathway	GO_BiologicalProcess-EBI-UniProt-GOA-ACAP-ARAP_05.04.2022_00h00	2.76372e-05	0.0139015	2.76372e-05	0.000138186	[6, 7, 8]	Group02	13.7255	7	[CADM4, DAB2IP, FLT3, GAB1, HSPB1, IL12B, PIK3CD]
GO:0060996	dendritic spine development	GO_BiologicalProcess-EBI-UniProt-GOA-ACAP-ARAP_05.04.2022_00h00	7.40308e-05	0.0348685	7.40308e-05	0.000148062	[3, 4, 7, 8, 10, 11, 12]	Group03	8.82353	9	[CAMK1, CDC42, CFL1, CTNND2, DBNL, DOCK10, IQSEC1, SRGAP2, TANC2]
GO:0032868	response to insulin	GO_BiologicalProcess-EBI-UniProt-GOA-ACAP-ARAP_05.04.2022_00h00	0.000100177	0.0457807	0.000100177	0.000100177	[5, 6, 7]	Group04	5.47445	15	[ATP2B1, CYFIP1, GAB1, GRB2, INSIG1, LCP1, LYN, NCK1, PIK3R3, PRKCB, RAB8B, SOCS1, SOCS3, YWHAG, ZFP36L1]
GO:0032869	cellular response to insulin stimulus	GO_BiologicalProcess-EBI-UniProt-GOA-ACAP-ARAP_05.04.2022_00h00	2.91795e-05	0.0145897	0.000100177	0.000100177	[6, 7, 8]	Group04	6.45161	14	[ATP2B1, CYFIP1, GAB1, GRB2, INSIG1, LCP1, NCK1, PIK3R3, PRKCB, RAB8B, SOCS1, SOCS3, YWHAG, ZFP36L1]
R-HSA:9013404	RAC2 GTPase cycle	REACTOME_Pathways_18.08.2022	3.67755e-10	2.40512e-07	8.36939e-13	2.84559e-11	[-1]	Group05	15.9091	14	[ABI1, ARHGAP17, ARHGDIA, CDC42, CYBA, CYFIP1, DEF6, DOCK10, ERBIN, NCF1, PIK3R3, RAC2, TIAM1, WASF2]
GO:0007265	Ras protein signal transduction	GO_BiologicalProcess-EBI-UniProt-GOA-ACAP-ARAP_05.04.2022_00h00	2.00483e-10	1.31517e-07	8.36939e-13	2.84559e-11	[5, 6, 7]	Group05	7.27273	28	[ARHGAP17, ARHGAP29, ARHGAP4, ARHGDIA, ARHGDIG, BCL6, CADM4, CDC42, CFL1, CYFIP1, CYTH4, DAB2IP, DBNL, DOK2, ERBIN, GABARAP, GRB2, IQSEC1, JUN, LPAR6, MRAS, NET1, RAC2, RAP1B, RAPGEF2, RHOG, TIAM1, WASF2]
GO:0016601	Rac protein signal transduction	GO_BiologicalProcess-EBI-UniProt-GOA-ACAP-ARAP_05.04.2022_00h00	6.83811e-08	4.32169e-05	8.36939e-13	2.84559e-11	[6, 7, 8]	Group05	20	9	[ARHGAP17, CADM4, CYFIP1, DBNL, GABARAP, RAC2, RHOG, TIAM1, WASF2]
GO:0002285	lymphocyte activation involved in immune response	GO_BiologicalProcess-EBI-UniProt-GOA-ACAP-ARAP_05.04.2022_00h00	5.61491e-06	0.00309381	8.5199e-13	2.81157e-11	[4, 5]	Group06	7.00935	15	[BCL6, CCL19, CD74, DOCK10, FCER1G, IL12B, IL21, IRF8, JUNB, LCP1, MFNG, PTPRC, SEMA4A, SLC15A4, SPI1]
GO:0030183	B cell differentiation	GO_BiologicalProcess-EBI-UniProt-GOA-ACAP-ARAP_05.04.2022_00h00	2.27748e-12	1.51452e-09	8.5199e-13	2.81157e-11	[5, 6, 7, 8, 9, 10, 11]	Group06	13.1579	20	[BCL6, BLNK, BTK, CMTM7, DOCK10, FLT3, ID2, IL21, IRF2BP2, IRF8, KLF6, MFNG, PIK3CD, PIK3R3, PTPN6, PTPRC, PTPRJ, SPI1, SYK, ZFP36L1]
GO:0002335	mature B cell differentiation	GO_BiologicalProcess-EBI-UniProt-GOA-ACAP-ARAP_05.04.2022_00h00	2.85345e-05	0.0142958	8.5199e-13	2.81157e-11	[6, 7, 8, 9, 10, 11, 12]	Group06	17.1429	6	[CMTM7, DOCK10, IL21, IRF8, MFNG, SPI1]
R-HSA:109582	Hemostasis	REACTOME_Pathways_18.08.2022	4.82325e-08	3.05311e-05	4.82325e-08	6.27022e-07	[-1]	Group07	5.15298	32	[ACTB, ACTN1, ATP2B1, BSG, CAPZA1, CD74, CDC42, CFL1, CYRIB, DOCK10, DOK2, FCAMR, FCER1G, FGR, GNAI1, GNG2, GRB2, IRF2, KIF1B, KIF21B, LYN, MAFG, PIK3R3, PLEK, PRKCB, PSAP, PTPN6, RAB5A, RAC2, RAP1B, RHOG, SYK]
R-HSA:114604	GPVI-mediated activation cascade	REACTOME_Pathways_18.08.2022	1.22996e-07	7.69954e-05	4.82325e-08	6.27022e-07	[-1]	Group07	22.8571	8	[CDC42, FCER1G, LYN, PIK3R3, PTPN6, RAC2, RHOG, SYK]
R-HSA:76002	Platelet activation, signaling and aggregation	REACTOME_Pathways_18.08.2022	9.19033e-07	0.000548663	4.82325e-08	6.27022e-07	[-1]	Group07	6.84411	18	[ACTN1, CDC42, CFL1, CYRIB, FCER1G, GNAI1, GNG2, GRB2, LYN, PIK3R3, PLEK, PRKCB, PSAP, PTPN6, RAC2, RAP1B, RHOG, SYK]
GO:0007264	small GTPase mediated signal transduction	GO_BiologicalProcess-EBI-UniProt-GOA-ACAP-ARAP_05.04.2022_00h00	4.52663e-13	3.03284e-10	4.52663e-13	1.58432e-11	[4, 5, 6]	Group08	6.90909	38	[ARHGAP12, ARHGAP17, ARHGAP29, ARHGAP4, ARHGAP45, ARHGDIA, ARHGDIG, ARHGEF15, BCL6, CADM4, CDC42, CFL1, CYFIP1, CYRIB, CYTH4, DAB2IP, DBNL, DEF6, DOCK10, DOK2, ERBIN, FGD4, GABARAP, GRB2, IQSEC1, JUN, LPAR6, MRAS, NET1, RAC2, RAP1B, RAP1GAP2, RAPGEF2, RHOG, SRGAP2, TAGAP, TIAM1, WASF2]
GO:0007265	Ras protein signal transduction	GO_BiologicalProcess-EBI-UniProt-GOA-ACAP-ARAP_05.04.2022_00h00	2.00483e-10	1.31517e-07	4.52663e-13	1.58432e-11	[5, 6, 7]	Group08	7.27273	28	[ARHGAP17, ARHGAP29, ARHGAP4, ARHGDIA, ARHGDIG, BCL6, CADM4, CDC42, CFL1, CYFIP1, CYTH4, DAB2IP, DBNL, DOK2, ERBIN, GABARAP, GRB2, IQSEC1, JUN, LPAR6, MRAS, NET1, RAC2, RAP1B, RAPGEF2, RHOG, TIAM1, WASF2]
GO:0051056	regulation of small GTPase mediated signal transduction	GO_BiologicalProcess-EBI-UniProt-GOA-ACAP-ARAP_05.04.2022_00h00	2.31979e-08	1.48003e-05	4.52663e-13	1.58432e-11	[5, 6, 7]	Group08	6.90691	23	[ARHGAP12, ARHGAP17, ARHGAP29, ARHGAP4, ARHGAP45, ARHGDIA, ARHGEF15, BCL6, CADM4, CYRIB, CYTH4, DAB2IP, DEF6, ERBIN, FGD4, GABARAP, IQSEC1, LPAR6, NET1, RAP1GAP2, SRGAP2, TAGAP, TIAM1]
GO:0016601	Rac protein signal transduction	GO_BiologicalProcess-EBI-UniProt-GOA-ACAP-ARAP_05.04.2022_00h00	6.83811e-08	4.32169e-05	4.52663e-13	1.58432e-11	[6, 7, 8]	Group08	20	9	[ARHGAP17, CADM4, CYFIP1, DBNL, GABARAP, RAC2, RHOG, TIAM1, WASF2]
R-HSA:373755	Semaphorin interactions	REACTOME_Pathways_18.08.2022	1.81628e-06	0.00104981	5.85968e-07	4.10178e-06	[-1]	Group09	13.8462	9	[CFL1, FES, HSP90AB1, PLXNA3, PLXNB1, PLXNC1, PTPRC, SEMA4A, SEMA7A]
GO:0022604	regulation of cell morphogenesis	GO_BiologicalProcess-EBI-UniProt-GOA-ACAP-ARAP_05.04.2022_00h00	1.90818e-05	0.00978896	5.85968e-07	4.10178e-06	[4, 5]	Group09	5.50459	18	[CDC42, CFL1, CYFIP1, DBNL, FES, FGD4, FGR, FMNL1, HCK, PLXNA3, PLXNB1, PLXNC1, RAC2, RHOG, SEMA4A, SH3KBP1, SLC9A3R1, TPM1]
GO:0008360	regulation of cell shape	GO_BiologicalProcess-EBI-UniProt-GOA-ACAP-ARAP_05.04.2022_00h00	1.78869e-07	0.000111257	5.85968e-07	4.10178e-06	[3, 5, 6]	Group09	9.20245	15	[CYFIP1, FES, FGD4, FGR, FMNL1, HCK, PLXNA3, PLXNB1, PLXNC1, RAC2, RHOG, SEMA4A, SH3KBP1, SLC9A3R1, TPM1]
GO:0048667	cell morphogenesis involved in neuron differentiation	GO_BiologicalProcess-EBI-UniProt-GOA-ACAP-ARAP_05.04.2022_00h00	8.49228e-07	0.000508688	5.85968e-07	4.10178e-06	[5, 6, 8, 9, 10]	Group09	4.81728	29	[ABI1, ACTB, ARHGAP4, BSG, CDC42, CFL1, CHL1, CTNND2, CYFIP1, DBNL, DOCK10, HSP90AB1, MYCBP2, NCAM1, PLXNA3, PLXNB1, PLXNC1, RAC2, RAPGEF2, RHOG, SEMA4A, SEMA6C, SEMA7A, SKIL, SLC9A3R1, SMOX, SULT4A1, TANC2, TIAM1]
GO:0050920	regulation of chemotaxis	GO_BiologicalProcess-EBI-UniProt-GOA-ACAP-ARAP_05.04.2022_00h00	6.77953e-06	0.00369485	6.54994e-10	1.44099e-08	[3, 4, 5]	Group10	6.53061	16	[CCL19, CD74, CMKLR1, CNOT6, CYRIB, DUSP1, HSPB1, LYN, MYCBP2, PLXNA3, RAC2, S1PR1, SEMA4A, SEMA6C, SEMA7A, SPI1]
GO:0002275	myeloid cell activation involved in immune response	GO_BiologicalProcess-EBI-UniProt-GOA-ACAP-ARAP_05.04.2022_00h00	2.68674e-06	0.00152875	6.54994e-10	1.44099e-08	[4, 5]	Group10	10.2804	11	[BTK, FCER1G, FES, FGR, GRN, LYN, PIK3CD, PTPN6, RAC2, SPI1, SYK]
GO:0060326	cell chemotaxis	GO_BiologicalProcess-EBI-UniProt-GOA-ACAP-ARAP_05.04.2022_00h00	2.65066e-06	0.00151088	6.54994e-10	1.44099e-08	[4, 5]	Group10	5.84795	20	[BSG, CCL19, CD74, CH25H, CMKLR1, CNOT6, CXCL9, DUSP1, FCER1G, GAB1, HSPB1, LYN, PIK3CD, RAC2, RHOG, S1PR1, SLC12A2, SPI1, SYK, XCR1]
GO:0030595	leukocyte chemotaxis	GO_BiologicalProcess-EBI-UniProt-GOA-ACAP-ARAP_05.04.2022_00h00	5.5556e-05	0.0268335	6.54994e-10	1.44099e-08	[3, 5, 6]	Group10	5.76923	15	[BSG, CCL19, CD74, CH25H, CMKLR1, CXCL9, DUSP1, FCER1G, LYN, PIK3CD, RAC2, S1PR1, SLC12A2, SPI1, SYK]
GO:0006986	response to unfolded protein	GO_BiologicalProcess-EBI-UniProt-GOA-ACAP-ARAP_05.04.2022_00h00	1.96756e-07	0.000122186	1.12454e-07	1.34944e-06	[4, 5]	Group11	9.85915	14	[ATF3, ATF4, CCND1, DAB2IP, DNAJB1, HSP90AB1, HSPA1A, HSPA1L, HSPA2, HSPB1, HSPH1, NCK1, PPP1R15A, TRAM1]
GO:0034620	cellular response to unfolded protein	GO_BiologicalProcess-EBI-UniProt-GOA-ACAP-ARAP_05.04.2022_00h00	7.40308e-05	0.0348685	1.12454e-07	1.34944e-06	[5, 6]	Group11	8.82353	9	[ATF3, ATF4, CCND1, DAB2IP, HSPA1A, HSPA1L, HSPA2, NCK1, PPP1R15A]
GO:0043620	regulation of DNA-templated transcription in response to stress	GO_BiologicalProcess-EBI-UniProt-GOA-ACAP-ARAP_05.04.2022_00h00	4.56375e-05	0.0222711	1.12454e-07	1.34944e-06	[4, 6, 7, 8, 9, 10, 11]	Group11	12.7273	7	[ATF3, ATF4, DNAJB1, HSPA1A, JUN, NCK1, TCIM]
GO:0097201	negative regulation of transcription from RNA polymerase II promoter in response to stress	GO_BiologicalProcess-EBI-UniProt-GOA-ACAP-ARAP_05.04.2022_00h00	4.03243e-05	0.0197186	1.12454e-07	1.34944e-06	[6, 8, 9, 10, 11, 12, 13]	Group11	33.3333	4	[DNAJB1, HSPA1A, JUN, NCK1]
GO:0048017	inositol lipid-mediated signaling	GO_BiologicalProcess-EBI-UniProt-GOA-ACAP-ARAP_05.04.2022_00h00	3.99683e-05	0.0195845	3.99683e-05	0.000159873	[4, 5, 6]	Group12	6.66667	13	[DAB2IP, FGR, FLT3, HCLS1, HCST, NCF1, PIK3AP1, PIK3CD, PLCB3, PLXNB1, PTPN6, SLC9A3R1, ZFP36L1]
GO:0048015	phosphatidylinositol-mediated signaling	GO_BiologicalProcess-EBI-UniProt-GOA-ACAP-ARAP_05.04.2022_00h00	3.04813e-05	0.0151797	3.99683e-05	0.000159873	[5, 6, 7]	Group12	6.84211	13	[DAB2IP, FGR, FLT3, HCLS1, HCST, NCF1, PIK3AP1, PIK3CD, PLCB3, PLXNB1, PTPN6, SLC9A3R1, ZFP36L1]
GO:0014065	phosphatidylinositol 3-kinase signaling	GO_BiologicalProcess-EBI-UniProt-GOA-ACAP-ARAP_05.04.2022_00h00	1.7007e-05	0.00884364	3.99683e-05	0.000159873	[6, 7, 8]	Group12	7.79221	12	[DAB2IP, FGR, FLT3, HCLS1, HCST, NCF1, PIK3AP1, PIK3CD, PLXNB1, PTPN6, SLC9A3R1, ZFP36L1]
GO:0014066	regulation of phosphatidylinositol 3-kinase signaling	GO_BiologicalProcess-EBI-UniProt-GOA-ACAP-ARAP_05.04.2022_00h00	3.89918e-05	0.0192229	3.99683e-05	0.000159873	[5, 6, 7, 8, 9]	Group12	8.54701	10	[DAB2IP, FGR, FLT3, HCLS1, HCST, NCF1, PIK3AP1, PLXNB1, PTPN6, SLC9A3R1]
GO:0001816	cytokine production	GO_BiologicalProcess-EBI-UniProt-GOA-ACAP-ARAP_05.04.2022_00h00	4.30089e-07	0.000262785	2.72544e-08	4.08817e-07	[2, 5]	Group13	4.43038	35	[AFAP1L2, ATF4, ATP2B1, BCL6, BTK, CADM1, CCL19, CD74, CMKLR1, CYBA, CYRIB, ERBIN, FCER1G, FGR, HLA-A, HSP90AB1, HSPA1A, HSPB1, IL12B, IL21, IRAK3, IRF8, LCP1, LYN, NAV3, PIK3CD, PTPN6, PTPRC, PTPRJ, SEMA7A, SOCS1, SYK, TLR6, TLR8, TNFRSF21]
GO:0001817	regulation of cytokine production	GO_BiologicalProcess-EBI-UniProt-GOA-ACAP-ARAP_05.04.2022_00h00	3.59687e-07	0.000220488	2.72544e-08	4.08817e-07	[3, 4, 5, 6]	Group13	4.46429	35	[AFAP1L2, ATF4, ATP2B1, BCL6, BTK, CADM1, CCL19, CD74, CMKLR1, CYBA, CYRIB, ERBIN, FCER1G, FGR, HLA-A, HSP90AB1, HSPA1A, HSPB1, IL12B, IL21, IRAK3, IRF8, LCP1, LYN, NAV3, PIK3CD, PTPN6, PTPRC, PTPRJ, SEMA7A, SOCS1, SYK, TLR6, TLR8, TNFRSF21]
GO:0019221	cytokine-mediated signaling pathway	GO_BiologicalProcess-EBI-UniProt-GOA-ACAP-ARAP_05.04.2022_00h00	2.57557e-05	0.0130581	2.72544e-08	4.08817e-07	[4, 5, 6]	Group13	4.59082	23	[CCL19, CD74, CMKLR1, CNOT6, CNTFR, CXCL9, FCER1G, FLT3, HCK, HSPA1A, IL12B, IL2RB, IL31RA, IRAK3, KRT18, PTPN6, PTPRC, PTPRJ, SOCS1, SPI1, SYK, TNFRSF1A, XCR1]
GO:0071345	cellular response to cytokine stimulus	GO_BiologicalProcess-EBI-UniProt-GOA-ACAP-ARAP_05.04.2022_00h00	2.85325e-07	0.00017576	2.72544e-08	4.08817e-07	[5]	Group13	4.36321	37	[BTK, CCL19, CD74, CDC42, CMKLR1, CNOT6, CNTFR, CXCL9, CYBA, DAB2IP, DUSP1, ERBIN, FCER1G, FLT3, HCK, HCLS1, HSP90AB1, HSPA1A, IL12B, IL2RB, IL31RA, IRAK3, IRF8, KRT18, MRAS, PTPN6, PTPRC, PTPRJ, SLC12A2, SOCS1, SOCS3, SPI1, SYK, TNFRSF1A, TNFRSF21, XCR1, ZFP36L1]
GO:0035556	intracellular signal transduction	GO_BiologicalProcess-EBI-UniProt-GOA-ACAP-ARAP_05.04.2022_00h00	9.84836e-21	6.75598e-18	9.84836e-21	4.92418e-19	[3, 4, 5]	Group14	4.15027	116	[ADRB2, AKT3, ANK2, ARHGAP12, ARHGAP17, ARHGAP29, ARHGAP4, ARHGAP45, ARHGDIA, ARHGDIG, ARHGEF15, ATF3, ATF4, BCL2L10, BCL6, BLNK, BTK, CADM4, CBLB, CCL19, CCND1, CD209, CD74, CDC42, CFL1, CMKLR1, CNOT6, CYFIP1, CYRIB, CYTH4, DAB2IP, DBNL, DDIT4, DDX5, DEF6, DOCK10, DOK2, DUSP1, DUSP6, ERBIN, FGD4, FGR, FLT3, GABARAP, GADD45B, GNAI1, GPX1, GRB2, HCLS1, HCST, HIPK3, HSP90AB1, HSPA1A, HSPB1, IL12B, …
GO:1902531	regulation of intracellular signal transduction	GO_BiologicalProcess-EBI-UniProt-GOA-ACAP-ARAP_05.04.2022_00h00	7.71142e-16	5.25148e-13	9.84836e-21	4.92418e-19	[4, 5, 6]	Group14	4.48009	81	[ADRB2, AKT3, ARHGAP12, ARHGAP17, ARHGAP29, ARHGAP4, ARHGAP45, ARHGDIA, ARHGEF15, ATF3, BCL2L10, BCL6, CADM4, CCL19, CD74, CDC42, CMKLR1, CYRIB, CYTH4, DAB2IP, DDIT4, DDX5, DEF6, DUSP1, DUSP6, ERBIN, FGD4, FGR, FLT3, GABARAP, GADD45B, GNAI1, GPX1, GRB2, HCLS1, HCST, HIPK3, HSP90AB1, HSPA1A, HSPB1, IL12B, IQSEC1, IRAK3, JUN, LPAR6, LYN, MCL1, NCF1, NCK1, NET1, PIK3AP1, PIK3CD, PLEK, PLEKHF1, PLXNB…
GO:1902532	negative regulation of intracellular signal transduction	GO_BiologicalProcess-EBI-UniProt-GOA-ACAP-ARAP_05.04.2022_00h00	1.17046e-06	0.000688229	9.84836e-21	4.92418e-19	[4, 5, 6, 7]	Group14	4.96324	27	[ARHGAP12, ATF3, BCL2L10, BCL6, CD74, CYRIB, DAB2IP, DDIT4, DUSP1, DUSP6, ERBIN, GPX1, HIPK3, HSPA1A, HSPB1, IRAK3, LYN, MCL1, PLEK, PTPN6, PTPRC, PTPRJ, RGS2, SLC9A3R1, SPI1, TNIP3, ZNF385A]
GO:1902533	positive regulation of intracellular signal transduction	GO_BiologicalProcess-EBI-UniProt-GOA-ACAP-ARAP_05.04.2022_00h00	2.49279e-09	1.61782e-06	9.84836e-21	4.92418e-19	[4, 5, 6, 7]	Group14	4.48046	47	[ADRB2, AKT3, CCL19, CD74, CDC42, DAB2IP, DDX5, ERBIN, FGR, FLT3, GADD45B, GPX1, HCLS1, HCST, HSP90AB1, HSPA1A, IL12B, JUN, LPAR6, LYN, MCL1, NCF1, NCK1, NET1, PIK3AP1, PIK3CD, PLEKHF1, PLXNB1, PRKCB, PTPN6, PTPRC, PTPRJ, RAP1B, RAPGEF2, SASH1, SEMA7A, SKIL, SLC15A4, SLC9A3R1, SPI1, SYK, TCIM, TIFA, TLR6, TNFRSF1A, UBB, ZNF385A]
GO:0001776	leukocyte homeostasis	GO_BiologicalProcess-EBI-UniProt-GOA-ACAP-ARAP_05.04.2022_00h00	7.98949e-05	0.0373908	2.74984e-08	3.84978e-07	[2, 5]	Group15	8.73786	9	[BSG, CD74, DOCK10, FLT3, LYN, PIK3CD, SKIL, SLC15A4, TSC22D3]
GO:0002262	myeloid cell homeostasis	GO_BiologicalProcess-EBI-UniProt-GOA-ACAP-ARAP_05.04.2022_00h00	5.68707e-05	0.0274117	2.74984e-08	3.84978e-07	[2, 5]	Group15	6.89655	12	[BCL6, BSG, CDK6, HCLS1, HSPA1A, ID2, IKZF1, LYN, PIK3CD, SLC15A4, SPI1, ZFP36L1]
GO:0071887	leukocyte apoptotic process	GO_BiologicalProcess-EBI-UniProt-GOA-ACAP-ARAP_05.04.2022_00h00	1.1609e-06	0.00068377	2.74984e-08	3.84978e-07	[5]	Group15	10.084	12	[BCL6, BSG, BTK, CCL19, CD74, HCLS1, LYN, PIK3CD, PLEKHO2, RAPGEF2, TNFRSF21, TSC22D3]
GO:2000106	regulation of leukocyte apoptotic process	GO_BiologicalProcess-EBI-UniProt-GOA-ACAP-ARAP_05.04.2022_00h00	5.10534e-06	0.00282836	2.74984e-08	3.84978e-07	[6, 7]	Group15	10.7527	10	[BCL6, BSG, BTK, CCL19, CD74, HCLS1, LYN, PIK3CD, RAPGEF2, TSC22D3]
R-HSA:1280218	Adaptive Immune System	REACTOME_Pathways_18.08.2022	7.52809e-09	4.84809e-06	3.97206e-19	1.90659e-17	[-1]	Group16	4.94148	38	[AKT3, BLNK, BTK, CAPZA1, CBLB, CD209, CD74, CDC42, CTSK, CTSS, CYBA, DAPP1, FYB1, GRB2, HCST, HLA-A, HLA-DOB, HUWE1, LYN, MYLIP, NCF1, NCK1, PIK3AP1, PIK3CD, PIK3R3, PRKCB, PTPN6, PTPRC, PTPRJ, RAP1B, RAP1GAP2, SH3KBP1, SOCS1, SOCS3, SYK, TLR6, UBB, UBE2E2]
R-HSA:168256	Immune System	REACTOME_Pathways_18.08.2022	3.97206e-19	2.72086e-16	3.97206e-19	1.90659e-17	[-1]	Group16	4.60168	93	[ABI1, ACTB, AKT3, ARHGAP45, ARPC1B, ARPC4, ARPC5, BCL6, BLNK, BTK, CAPZA1, CBLB, CCL19, CCND1, CD209, CD53, CD74, CDC42, CFL1, CNTFR, CTSK, CTSS, CYBA, CYFIP1, DAPP1, DBNL, DUSP6, FCER1G, FGR, FLT3, FOS, FYB1, GM2A, GRB2, GRN, HCK, HCST, HLA-A, HLA-DOB, HSP90AB1, HSPA1A, HUWE1, IL12B, IL21, IL2RB, IL31RA, IRAK3, IRF2, IRF8, JUN, JUNB, LCP1, LYN, MCL1, MYLIP, NCAM1, NCF1, NCK1, NUP160, PDXK, PIK3…
R-HSA:983695	Antigen activates B Cell Receptor (BCR) leading to generation of second messengers	REACTOME_Pathways_18.08.2022	3.58107e-12	2.37783e-09	3.97206e-19	1.90659e-17	[-1]	Group16	34.375	11	[BLNK, BTK, DAPP1, GRB2, LYN, NCK1, PIK3AP1, PIK3CD, PTPN6, SH3KBP1, SYK]
R-HSA:983705	Signaling by the B Cell Receptor (BCR)	REACTOME_Pathways_18.08.2022	7.86833e-08	4.96491e-05	3.97206e-19	1.90659e-17	[-1]	Group16	11.6071	13	[BLNK, BTK, DAPP1, GRB2, LYN, NCK1, PIK3AP1, PIK3CD, PRKCB, PTPN6, SH3KBP1, SYK, UBB]
R-HSA:373755	Semaphorin interactions	REACTOME_Pathways_18.08.2022	1.81628e-06	0.00104981	3.56864e-07	2.85491e-06	[-1]	Group17	13.8462	9	[CFL1, FES, HSP90AB1, PLXNA3, PLXNB1, PLXNC1, PTPRC, SEMA4A, SEMA7A]
R-HSA:3928662	EPHB-mediated forward signaling	REACTOME_Pathways_18.08.2022	5.54654e-07	0.000337229	3.56864e-07	2.85491e-06	[-1]	Group17	19.0476	8	[ACTB, ARPC1B, ARPC4, ARPC5, CDC42, CFL1, LYN, TIAM1]
R-HSA:422475	Axon guidance	REACTOME_Pathways_18.08.2022	1.41587e-07	8.83502e-05	3.56864e-07	2.85491e-06	[-1]	Group17	5.25362	29	[ACTB, ANK2, ARPC1B, ARPC4, ARPC5, CDC42, CFL1, CHL1, DOK2, FES, GAB1, GRB2, HSP90AB1, LYN, MSI1, NCAM1, NCK1, PIK3CD, PIK3R3, PLXNA3, PLXNB1, PLXNC1, PTPRC, SEMA4A, SEMA7A, SH3KBP1, SRGAP2, TIAM1, UBB]
R-HSA:9675108	Nervous system development	REACTOME_Pathways_18.08.2022	3.56864e-07	0.000219472	3.56864e-07	2.85491e-06	[-1]	Group17	5.026	29	[ACTB, ANK2, ARPC1B, ARPC4, ARPC5, CDC42, CFL1, CHL1, DOK2, FES, GAB1, GRB2, HSP90AB1, LYN, MSI1, NCAM1, NCK1, PIK3CD, PIK3R3, PLXNA3, PLXNB1, PLXNC1, PTPRC, SEMA4A, SEMA7A, SH3KBP1, SRGAP2, TIAM1, UBB]
R-HSA:1679131	Trafficking and processing of endosomal TLR	REACTOME_Pathways_18.08.2022	5.74466e-05	0.0275744	2.00857e-10	4.82057e-09	[-1]	Group18	30.7692	4	[CTSK, CTSS, TLR8, UNC93B1]
R-HSA:168898	Toll-like Receptor Cascades	REACTOME_Pathways_18.08.2022	8.19206e-06	0.00439914	2.00857e-10	4.82057e-09	[-1]	Group18	7.7381	13	[BTK, CTSK, CTSS, DUSP6, FOS, IRAK3, JUN, SOCS1, TIFA, TLR6, TLR8, UBB, UNC93B1]
GO:0002764	immune response-regulating signaling pathway	GO_BiologicalProcess-EBI-UniProt-GOA-ACAP-ARAP_05.04.2022_00h00	6.38583e-09	4.11886e-06	2.00857e-10	4.82057e-09	[3, 4, 5]	Group18	5.75139	31	[BLNK, BTK, CBLB, CMKLR1, CTSS, CYBA, DAB2IP, ERBIN, FCER1G, FGR, FYB1, HCK, HLA-A, HSPA1A, IRAK3, LYN, NCOR2, PIK3AP1, PIK3CD, PRKCB, PTPN6, PTPRC, PTPRJ, SLC15A4, SYK, TIFA, TLR6, TLR8, TNFRSF21, TNIP3, UNC93B1]
GO:0002221	pattern recognition receptor signaling pathway	GO_BiologicalProcess-EBI-UniProt-GOA-ACAP-ARAP_05.04.2022_00h00	1.5665e-06	0.000907005	2.00857e-10	4.82057e-09	[4, 5, 6]	Group18	7.77202	15	[BTK, CTSS, CYBA, DAB2IP, ERBIN, HSPA1A, IRAK3, LYN, PIK3AP1, SLC15A4, TIFA, TLR6, TLR8, TNIP3, UNC93B1]
GO:0002224	toll-like receptor signaling pathway	GO_BiologicalProcess-EBI-UniProt-GOA-ACAP-ARAP_05.04.2022_00h00	2.52402e-06	0.00144121	2.00857e-10	4.82057e-09	[5, 6, 7]	Group18	9.375	12	[BTK, CTSS, CYBA, DAB2IP, IRAK3, LYN, PIK3AP1, SLC15A4, TLR6, TLR8, TNIP3, UNC93B1]
R-HSA:2219528	PI3K/AKT Signaling in Cancer	REACTOME_Pathways_18.08.2022	8.61443e-05	0.039971	2.67177e-09	5.61071e-08	[-1]	Group19	8.65385	9	[AKT3, FLT3, GAB1, GRB2, PIK3AP1, PIK3CD, PIK3R3, RAC2, RHOG]
R-HSA:2219530	Constitutive Signaling by Aberrant PI3K in Cancer	REACTOME_Pathways_18.08.2022	6.39324e-05	0.0304318	2.67177e-09	5.61071e-08	[-1]	Group19	10.2564	8	[FLT3, GAB1, GRB2, PIK3AP1, PIK3CD, PIK3R3, RAC2, RHOG]
R-HSA:5663202	Diseases of signal transduction by growth factor receptors and second messengers	REACTOME_Pathways_18.08.2022	2.61893e-05	0.0132256	2.67177e-09	5.61071e-08	[-1]	Group19	4.84988	21	[ACTB, AKT3, DUSP6, ERBIN, FLT3, GAB1, GRB2, JUNB, LYN, MRAS, MYO18A, NCOR2, PIK3AP1, PIK3CD, PIK3R3, PIM1, RAC2, RAP1B, RHOG, TPM3, UBB]
R-HSA:9006934	Signaling by Receptor Tyrosine Kinases	REACTOME_Pathways_18.08.2022	1.10674e-08	7.10527e-06	2.67177e-09	5.61071e-08	[-1]	Group19	5.75816	30	[ABI1, ACTB, AKT3, CDC42, CYBA, CYFIP1, DUSP6, ERBIN, FES, FLT3, FOS, GAB1, GRB2, HSPB1, ID2, JUNB, LYN, NCF1, NCK1, PIK3R3, PRKCB, PTPN18, PTPN6, PTPRJ, RAP1B, SH3KBP1, SOCS1, TIAM1, UBB, WASF2]
R-HSA:912526	Interleukin receptor SHC signaling	REACTOME_Pathways_18.08.2022	9.23234e-05	0.0425611	2.67177e-09	5.61071e-08	[-1]	Group19	18.5185	5	[GRB2, IL2RB, PIK3CD, PIK3R3, PTPN6]
GO:0097190	apoptotic signaling pathway	GO_BiologicalProcess-EBI-UniProt-GOA-ACAP-ARAP_05.04.2022_00h00	7.58203e-06	0.0040943	1.44525e-07	1.58978e-06	[3, 4, 5]	Group20	4.3956	28	[ATF3, ATF4, BCL2L10, BIK, BTK, CD74, DAB2IP, DDIT4, DDX5, GABARAP, GPX1, HSPA1A, HSPB1, KRT18, MCL1, MKNK2, MRTFA, NCK1, PLEKHF1, PPP1R15A, PTPRC, SKIL, SLC35F6, SLC9A3R1, SPI1, TNFRSF1A, UBB, ZNF385A]
GO:0097191	extrinsic apoptotic signaling pathway	GO_BiologicalProcess-EBI-UniProt-GOA-ACAP-ARAP_05.04.2022_00h00	8.33298e-05	0.0388317	1.44525e-07	1.58978e-06	[4, 5, 6]	Group20	5.85774	14	[ATF3, BCL2L10, DAB2IP, GABARAP, GPX1, HSPA1A, KRT18, MCL1, MKNK2, MRTFA, PTPRC, SKIL, SPI1, TNFRSF1A]
GO:0097193	intrinsic apoptotic signaling pathway	GO_BiologicalProcess-EBI-UniProt-GOA-ACAP-ARAP_05.04.2022_00h00	1.05839e-05	0.00563062	1.44525e-07	1.58978e-06	[4, 5, 6]	Group20	5.7508	18	[ATF4, BCL2L10, CD74, DAB2IP, DDIT4, DDX5, GPX1, HSPA1A, HSPB1, MCL1, NCK1, PLEKHF1, PPP1R15A, SKIL, SLC9A3R1, TNFRSF1A, UBB, ZNF385A]
GO:1902532	negative regulation of intracellular signal transduction	GO_BiologicalProcess-EBI-UniProt-GOA-ACAP-ARAP_05.04.2022_00h00	1.17046e-06	0.000688229	1.44525e-07	1.58978e-06	[4, 5, 6, 7]	Group20	4.96324	27	[ARHGAP12, ATF3, BCL2L10, BCL6, CD74, CYRIB, DAB2IP, DDIT4, DUSP1, DUSP6, ERBIN, GPX1, HIPK3, HSPA1A, HSPB1, IRAK3, LYN, MCL1, PLEK, PTPN6, PTPRC, PTPRJ, RGS2, SLC9A3R1, SPI1, TNIP3, ZNF385A]
GO:2001242	regulation of intrinsic apoptotic signaling pathway	GO_BiologicalProcess-EBI-UniProt-GOA-ACAP-ARAP_05.04.2022_00h00	7.88846e-05	0.0369969	1.44525e-07	1.58978e-06	[5, 6, 7, 8]	Group20	6.66667	12	[BCL2L10, CD74, GPX1, HSPA1A, HSPB1, MCL1, NCK1, PLEKHF1, SKIL, SLC9A3R1, UBB, ZNF385A]
GO:0002262	myeloid cell homeostasis	GO_BiologicalProcess-EBI-UniProt-GOA-ACAP-ARAP_05.04.2022_00h00	5.68707e-05	0.0274117	6.54458e-11	1.76704e-09	[2, 5]	Group21	6.89655	12	[BCL6, BSG, CDK6, HCLS1, HSPA1A, ID2, IKZF1, LYN, PIK3CD, SLC15A4, SPI1, ZFP36L1]
GO:1903706	regulation of hemopoiesis	GO_BiologicalProcess-EBI-UniProt-GOA-ACAP-ARAP_05.04.2022_00h00	1.2792e-06	0.000748334	6.54458e-11	1.76704e-09	[3, 4, 5, 6, 7, 8]	Group21	5.51559	23	[ACTB, BCL6, BTK, CCL19, CD74, CDK6, FES, FOS, HCLS1, HSPA1A, ID2, IL12B, JUNB, LYN, PTPN6, PTPRC, SOCS1, SPI1, SYK, TCIM, TMEM178A, TNFRSF11B, ZFP36L1]
GO:0030099	myeloid cell differentiation	GO_BiologicalProcess-EBI-UniProt-GOA-ACAP-ARAP_05.04.2022_00h00	7.63858e-11	5.02619e-08	6.54458e-11	1.76704e-09	[4, 5, 6, 7, 8]	Group21	7.109	30	[ABI1, ACTN1, BATF3, BCL6, CCL19, CD74, CDC42, CDK6, FES, FOS, HCLS1, HSPA1A, ID2, IKZF1, IL12B, IL31RA, IRF8, JUN, JUNB, LYN, PIK3CD, PTPN6, SIGLEC15, SOCS1, SPI1, TMEM178A, TNFRSF11B, WASF2, ZFP36L1, ZNF385A]
GO:2000106	regulation of leukocyte apoptotic process	GO_BiologicalProcess-EBI-UniProt-GOA-ACAP-ARAP_05.04.2022_00h00	5.10534e-06	0.00282836	6.54458e-11	1.76704e-09	[6, 7]	Group21	10.7527	10	[BCL6, BSG, BTK, CCL19, CD74, HCLS1, LYN, PIK3CD, RAPGEF2, TSC22D3]
GO:0002761	regulation of myeloid leukocyte differentiation	GO_BiologicalProcess-EBI-UniProt-GOA-ACAP-ARAP_05.04.2022_00h00	1.12759e-05	0.00597625	6.54458e-11	1.76704e-09	[5, 6, 7, 8, 9, 10]	Group21	8.87097	11	[CD74, CDK6, FES, FOS, HCLS1, ID2, IL12B, LYN, TMEM178A, TNFRSF11B, ZFP36L1]
R-HSA:168249	Innate Immune System	REACTOME_Pathways_18.08.2022	3.9124e-13	2.62522e-10	1.27616e-18	5.99795e-17	[-1]	Group22	5.145	55	[ABI1, ACTB, ARHGAP45, ARPC1B, ARPC4, ARPC5, BTK, CAPZA1, CD209, CD53, CDC42, CFL1, CTSK, CTSS, CYBA, CYFIP1, DBNL, DUSP6, FCER1G, FGR, FOS, GM2A, GRB2, GRN, HCK, HLA-A, HSP90AB1, HSPA1A, HUWE1, IRAK3, JUN, LYN, NCF1, NCK1, PDXK, PLEKHO2, PSAP, PTPN6, PTPRC, PTPRJ, RAC2, RAP1B, RHOG, SIGLEC15, SLC15A4, SOCS1, SYK, TIFA, TIMP2, TLR6, TLR8, UBB, UNC93B1, WASF2, WIPF1]
R-HSA:168256	Immune System	REACTOME_Pathways_18.08.2022	3.97206e-19	2.72086e-16	1.27616e-18	5.99795e-17	[-1]	Group22	4.60168	93	[ABI1, ACTB, AKT3, ARHGAP45, ARPC1B, ARPC4, ARPC5, BCL6, BLNK, BTK, CAPZA1, CBLB, CCL19, CCND1, CD209, CD53, CD74, CDC42, CFL1, CNTFR, CTSK, CTSS, CYBA, CYFIP1, DAPP1, DBNL, DUSP6, FCER1G, FGR, FLT3, FOS, FYB1, GM2A, GRB2, GRN, HCK, HCST, HLA-A, HLA-DOB, HSP90AB1, HSPA1A, HUWE1, IL12B, IL21, IL2RB, IL31RA, IRAK3, IRF2, IRF8, JUN, JUNB, LCP1, LYN, MCL1, MYLIP, NCAM1, NCF1, NCK1, NUP160, PDXK, PIK3…
R-HSA:2029480	Fcgamma receptor (FCGR) dependent phagocytosis	REACTOME_Pathways_18.08.2022	7.28296e-15	4.93056e-12	1.27616e-18	5.99795e-17	[-1]	Group22	20.9302	18	[ABI1, ACTB, ARPC1B, ARPC4, ARPC5, BTK, CDC42, CFL1, CYFIP1, FGR, GRB2, HCK, HSP90AB1, LYN, NCK1, SYK, WASF2, WIPF1]
R-HSA:6798695	Neutrophil degranulation	REACTOME_Pathways_18.08.2022	1.34432e-06	0.000783736	1.27616e-18	5.99795e-17	[-1]	Group22	5.18672	25	[ARHGAP45, ARPC5, CD53, CTSS, CYBA, CYFIP1, DBNL, FCER1G, FGR, GM2A, GRN, HLA-A, HSP90AB1, HSPA1A, HUWE1, PDXK, PLEKHO2, PSAP, PTPN6, PTPRC, PTPRJ, RAP1B, RHOG, SLC15A4, TIMP2]
R-HSA:9658195	Leishmania infection	REACTOME_Pathways_18.08.2022	7.38887e-10	4.81754e-07	1.27616e-18	5.99795e-17	[-1]	Group22	8.66142	22	[ABI1, ACTB, ADRB2, ARPC1B, ARPC4, ARPC5, BTK, CDC42, CYBA, CYFIP1, FGR, GNAI1, GNG2, GRB2, HCK, HSP90AB1, JUN, LYN, NCK1, SYK, WASF2, WIPF1]
R-HSA:194138	Signaling by VEGF	REACTOME_Pathways_18.08.2022	2.94551e-06	0.00166422	3.1948e-13	1.21402e-11	[-1]	Group23	10.1852	11	[ABI1, ACTB, AKT3, CDC42, CYBA, CYFIP1, HSPB1, NCF1, NCK1, PRKCB, WASF2]
R-HSA:4420097	VEGFA-VEGFR2 Pathway	REACTOME_Pathways_18.08.2022	1.23701e-06	0.00072489	3.1948e-13	1.21402e-11	[-1]	Group23	11.1111	11	[ABI1, ACTB, AKT3, CDC42, CYBA, CYFIP1, HSPB1, NCF1, NCK1, PRKCB, WASF2]
R-HSA:5663202	Diseases of signal transduction by growth factor receptors and second messengers	REACTOME_Pathways_18.08.2022	2.61893e-05	0.0132256	3.1948e-13	1.21402e-11	[-1]	Group23	4.84988	21	[ACTB, AKT3, DUSP6, ERBIN, FLT3, GAB1, GRB2, JUNB, LYN, MRAS, MYO18A, NCOR2, PIK3AP1, PIK3CD, PIK3R3, PIM1, RAC2, RAP1B, RHOG, TPM3, UBB]
R-HSA:9006934	Signaling by Receptor Tyrosine Kinases	REACTOME_Pathways_18.08.2022	1.10674e-08	7.10527e-06	3.1948e-13	1.21402e-11	[-1]	Group23	5.75816	30	[ABI1, ACTB, AKT3, CDC42, CYBA, CYFIP1, DUSP6, ERBIN, FES, FLT3, FOS, GAB1, GRB2, HSPB1, ID2, JUNB, LYN, NCF1, NCK1, PIK3R3, PRKCB, PTPN18, PTPN6, PTPRJ, RAP1B, SH3KBP1, SOCS1, TIAM1, UBB, WASF2]
GO:0007169	transmembrane receptor protein tyrosine kinase signaling pathway	GO_BiologicalProcess-EBI-UniProt-GOA-ACAP-ARAP_05.04.2022_00h00	1.86528e-11	1.23108e-08	3.1948e-13	1.21402e-11	[5, 6, 7]	Group23	5.9816	39	[ABI1, ADRB2, AFAP1L2, BLNK, CADM4, CBLB, CRIM1, CYFIP1, DAB2IP, DDIT4, DOK2, ERBIN, FES, FGF12, FGR, FLT3, GAB1, GRB2, HCK, HSPB1, IL12B, IL31RA, LYN, NCF1, NCK1, PIK3CD, PIK3R3, PRKCB, PTPN18, PTPRJ, RAPGEF2, SETX, SH2D6, SLC9A3R1, SOCS1, SOCS3, SYK, TIAM1, TIPARP]
R-HSA:9006934	Signaling by Receptor Tyrosine Kinases	REACTOME_Pathways_18.08.2022	1.10674e-08	7.10527e-06	2.043e-11	5.92469e-10	[-1]	Group24	5.75816	30	[ABI1, ACTB, AKT3, CDC42, CYBA, CYFIP1, DUSP6, ERBIN, FES, FLT3, FOS, GAB1, GRB2, HSPB1, ID2, JUNB, LYN, NCF1, NCK1, PIK3R3, PRKCB, PTPN18, PTPN6, PTPRJ, RAP1B, SH3KBP1, SOCS1, TIAM1, UBB, WASF2]
GO:0007167	enzyme-linked receptor protein signaling pathway	GO_BiologicalProcess-EBI-UniProt-GOA-ACAP-ARAP_05.04.2022_00h00	4.17127e-09	2.69881e-06	2.043e-11	5.92469e-10	[4, 5, 6]	Group24	4.46602	46	[ABI1, ADRB2, AFAP1L2, BLNK, CADM4, CBLB, CRIM1, CYFIP1, DAB2IP, DDIT4, DDX5, DOK2, ERBIN, FES, FGF12, FGR, FLT3, FOS, GAB1, GRB2, HCK, HSP90AB1, HSPA1A, HSPB1, IL12B, IL31RA, JUN, LYN, NCF1, NCK1, PIK3CD, PIK3R3, PRKCB, PTPN18, PTPRJ, RAPGEF2, SETX, SH2D6, SKIL, SLC9A3R1, SOCS1, SOCS3, SPI1, SYK, TIAM1, TIPARP]
GO:0007169	transmembrane receptor protein tyrosine kinase signaling pathway	GO_BiologicalProcess-EBI-UniProt-GOA-ACAP-ARAP_05.04.2022_00h00	1.86528e-11	1.23108e-08	2.043e-11	5.92469e-10	[5, 6, 7]	Group24	5.9816	39	[ABI1, ADRB2, AFAP1L2, BLNK, CADM4, CBLB, CRIM1, CYFIP1, DAB2IP, DDIT4, DOK2, ERBIN, FES, FGF12, FGR, FLT3, GAB1, GRB2, HCK, HSPB1, IL12B, IL31RA, LYN, NCF1, NCK1, PIK3CD, PIK3R3, PRKCB, PTPN18, PTPRJ, RAPGEF2, SETX, SH2D6, SLC9A3R1, SOCS1, SOCS3, SYK, TIAM1, TIPARP]
GO:0001932	regulation of protein phosphorylation	GO_BiologicalProcess-EBI-UniProt-GOA-ACAP-ARAP_05.04.2022_00h00	4.55099e-08	2.88533e-05	2.043e-11	5.92469e-10	[6, 7, 8]	Group24	4.07125	48	[ABI1, ACTB, ADRB2, AFAP1L2, CADM4, CAMK1, CBLB, CCL19, CCND1, CD74, DAB2IP, DDIT4, DUSP1, DUSP6, FGR, FLT3, GADD45B, HCLS1, HIPK3, HSP90AB1, HSPA2, HSPB1, IL12B, IL21, IL31RA, IRAK3, JUN, LYN, NCF1, NCK1, PIK3R3, PLPP3, PTPN6, PTPRC, PTPRJ, RAPGEF2, RGS2, SASH1, SEMA7A, SLC9A3R1, SOCS1, SOCS3, SYK, TCIM, TLR6, TLR8, TNFRSF1A, YWHAG]
GO:0018212	peptidyl-tyrosine modification	GO_BiologicalProcess-EBI-UniProt-GOA-ACAP-ARAP_05.04.2022_00h00	1.24413e-07	7.7758e-05	2.043e-11	5.92469e-10	[7, 8]	Group24	5.89623	25	[ABI1, AFAP1L2, BTK, CADM4, CBLB, CD74, CRIM1, FES, FGR, FLT3, HCK, HCLS1, HIPK3, IL12B, IL21, IL31RA, LYN, NCF1, PTPN6, PTPRC, PTPRJ, SOCS1, SOCS3, SYK, TNFRSF1A]
GO:0018108	peptidyl-tyrosine phosphorylation	GO_BiologicalProcess-EBI-UniProt-GOA-ACAP-ARAP_05.04.2022_00h00	1.08644e-07	6.81201e-05	2.043e-11	5.92469e-10	[7, 8, 9]	Group24	5.93824	25	[ABI1, AFAP1L2, BTK, CADM4, CBLB, CD74, CRIM1, FES, FGR, FLT3, HCK, HCLS1, HIPK3, IL12B, IL21, IL31RA, LYN, NCF1, PTPN6, PTPRC, PTPRJ, SOCS1, SOCS3, SYK, TNFRSF1A]
GO:0019221	cytokine-mediated signaling pathway	GO_BiologicalProcess-EBI-UniProt-GOA-ACAP-ARAP_05.04.2022_00h00	2.57557e-05	0.0130581	2.19872e-08	3.9577e-07	[4, 5, 6]	Group25	4.59082	23	[CCL19, CD74, CMKLR1, CNOT6, CNTFR, CXCL9, FCER1G, FLT3, HCK, HSPA1A, IL12B, IL2RB, IL31RA, IRAK3, KRT18, PTPN6, PTPRC, PTPRJ, SOCS1, SPI1, SYK, TNFRSF1A, XCR1]
GO:0071345	cellular response to cytokine stimulus	GO_BiologicalProcess-EBI-UniProt-GOA-ACAP-ARAP_05.04.2022_00h00	2.85325e-07	0.00017576	2.19872e-08	3.9577e-07	[5]	Group25	4.36321	37	[BTK, CCL19, CD74, CDC42, CMKLR1, CNOT6, CNTFR, CXCL9, CYBA, DAB2IP, DUSP1, ERBIN, FCER1G, FLT3, HCK, HCLS1, HSP90AB1, HSPA1A, IL12B, IL2RB, IL31RA, IRAK3, IRF8, KRT18, MRAS, PTPN6, PTPRC, PTPRJ, SLC12A2, SOCS1, SOCS3, SPI1, SYK, TNFRSF1A, TNFRSF21, XCR1, ZFP36L1]
GO:0004896	cytokine receptor activity	GO_BiologicalProcess-EBI-UniProt-GOA-ACAP-ARAP_05.04.2022_00h00	6.33827e-05	0.0302969	2.19872e-08	3.9577e-07	[5, 6, 7]	Group25	9	9	[CD74, CMKLR1, CNOT6, CNTFR, FLT3, IL12B, IL2RB, IL31RA, XCR1]
GO:0018212	peptidyl-tyrosine modification	GO_BiologicalProcess-EBI-UniProt-GOA-ACAP-ARAP_05.04.2022_00h00	1.24413e-07	7.7758e-05	2.19872e-08	3.9577e-07	[7, 8]	Group25	5.89623	25	[ABI1, AFAP1L2, BTK, CADM4, CBLB, CD74, CRIM1, FES, FGR, FLT3, HCK, HCLS1, HIPK3, IL12B, IL21, IL31RA, LYN, NCF1, PTPN6, PTPRC, PTPRJ, SOCS1, SOCS3, SYK, TNFRSF1A]
GO:0018108	peptidyl-tyrosine phosphorylation	GO_BiologicalProcess-EBI-UniProt-GOA-ACAP-ARAP_05.04.2022_00h00	1.08644e-07	6.81201e-05	2.19872e-08	3.9577e-07	[7, 8, 9]	Group25	5.93824	25	[ABI1, AFAP1L2, BTK, CADM4, CBLB, CD74, CRIM1, FES, FGR, FLT3, HCK, HCLS1, HIPK3, IL12B, IL21, IL31RA, LYN, NCF1, PTPN6, PTPRC, PTPRJ, SOCS1, SOCS3, SYK, TNFRSF1A]
GO:0050730	regulation of peptidyl-tyrosine phosphorylation	GO_BiologicalProcess-EBI-UniProt-GOA-ACAP-ARAP_05.04.2022_00h00	4.9228e-07	0.000300291	2.19872e-08	3.9577e-07	[7, 8, 9, 10]	Group25	6.81004	19	[ABI1, AFAP1L2, CADM4, CBLB, CD74, FLT3, HCLS1, IL12B, IL21, IL31RA, LYN, NCF1, PTPN6, PTPRC, PTPRJ, SOCS1, SOCS3, SYK, TNFRSF1A]
GO:0010942	positive regulation of cell death	GO_BiologicalProcess-EBI-UniProt-GOA-ACAP-ARAP_05.04.2022_00h00	1.03732e-06	0.000613055	3.97148e-13	1.42973e-11	[3, 4, 5]	Group26	4.76974	29	[ATF3, ATF4, BCL6, BIN1, CDC42, DAB2IP, DDIT4, DUSP6, FOS, GADD45B, GRN, IL12B, JUN, LYN, MCL1, MRTFA, NCK1, NET1, PIK3CD, PLEKHF1, PTPRC, RAPGEF2, SKIL, SLC9A3R1, STK17B, SYK, TLR6, TNFRSF1A, UBB]
GO:0043067	regulation of programmed cell death	GO_BiologicalProcess-EBI-UniProt-GOA-ACAP-ARAP_05.04.2022_00h00	1.15746e-11	7.66237e-09	3.97148e-13	1.42973e-11	[4, 5]	Group26	4.21456	66	[ACTB, ACTN1, ARHGDIA, ARL6IP1, ATF3, ATF4, BCL2L10, BCL6, BIK, BIN1, BSG, BTK, CCL19, CD74, CDC42, CFL1, CHL1, CNTFR, CYFIP1, DAB2IP, DUSP6, FLT3, GADD45B, GPX1, GRIA4, GRN, HCK, HCLS1, HIPK3, HSP90AB1, HSPA1A, HSPB1, IL12B, IL2RB, IL31RA, JUN, KDM2B, KRT18, LYN, MCL1, MRTFA, MYO18A, NCK1, NET1, NME1, PIK3CD, PIK3R3, PIM1, PLEKHF1, PTPN6, PTPRC, RAPGEF2, SETX, SKIL, SLC35F6, SLC9A3R1, SMOX, SOCS…
GO:0043068	positive regulation of programmed cell death	GO_BiologicalProcess-EBI-UniProt-GOA-ACAP-ARAP_05.04.2022_00h00	2.8283e-06	0.00160082	3.97148e-13	1.42973e-11	[4, 5, 6]	Group26	4.85075	26	[ATF3, ATF4, BCL6, BIN1, CDC42, DAB2IP, DUSP6, GADD45B, GRN, IL12B, JUN, LYN, MCL1, MRTFA, NCK1, NET1, PIK3CD, PLEKHF1, PTPRC, RAPGEF2, SKIL, SLC9A3R1, STK17B, SYK, TNFRSF1A, UBB]
GO:0042981	regulation of apoptotic process	GO_BiologicalProcess-EBI-UniProt-GOA-ACAP-ARAP_05.04.2022_00h00	1.3844e-11	9.1509e-09	3.97148e-13	1.42973e-11	[5, 6]	Group26	4.23729	65	[ACTB, ACTN1, ARHGDIA, ARL6IP1, ATF3, ATF4, BCL2L10, BCL6, BIK, BIN1, BSG, BTK, CCL19, CD74, CDC42, CFL1, CHL1, CNTFR, CYFIP1, DAB2IP, DUSP6, FLT3, GADD45B, GPX1, GRIA4, GRN, HCK, HCLS1, HIPK3, HSP90AB1, HSPA1A, HSPB1, IL12B, IL2RB, IL31RA, JUN, KDM2B, KRT18, LYN, MCL1, MRTFA, MYO18A, NCK1, NET1, NME1, PIK3CD, PIK3R3, PIM1, PLEKHF1, PTPN6, PTPRC, RAPGEF2, SETX, SKIL, SLC35F6, SLC9A3R1, SMOX, SOCS…
GO:1902533	positive regulation of intracellular signal transduction	GO_BiologicalProcess-EBI-UniProt-GOA-ACAP-ARAP_05.04.2022_00h00	2.49279e-09	1.61782e-06	3.97148e-13	1.42973e-11	[4, 5, 6, 7]	Group26	4.48046	47	[ADRB2, AKT3, CCL19, CD74, CDC42, DAB2IP, DDX5, ERBIN, FGR, FLT3, GADD45B, GPX1, HCLS1, HCST, HSP90AB1, HSPA1A, IL12B, JUN, LPAR6, LYN, MCL1, NCF1, NCK1, NET1, PIK3AP1, PIK3CD, PLEKHF1, PLXNB1, PRKCB, PTPN6, PTPRC, PTPRJ, RAP1B, RAPGEF2, SASH1, SEMA7A, SKIL, SLC15A4, SLC9A3R1, SPI1, SYK, TCIM, TIFA, TLR6, TNFRSF1A, UBB, ZNF385A]
GO:0043065	positive regulation of apoptotic process	GO_BiologicalProcess-EBI-UniProt-GOA-ACAP-ARAP_05.04.2022_00h00	5.51748e-06	0.00304565	3.97148e-13	1.42973e-11	[5, 6, 7]	Group26	4.78927	25	[ATF3, ATF4, BCL6, BIN1, CDC42, DAB2IP, DUSP6, GADD45B, GRN, IL12B, JUN, LYN, MCL1, MRTFA, NCK1, NET1, PIK3CD, PLEKHF1, PTPRC, RAPGEF2, SKIL, SLC9A3R1, STK17B, TNFRSF1A, UBB]
R-HSA:1280215	Cytokine Signaling in Immune system	REACTOME_Pathways_18.08.2022	5.01876e-13	3.35755e-10	3.97206e-19	1.90659e-17	[-1]	Group27	6.06897	44	[AKT3, BCL6, BLNK, CAPZA1, CCL19, CCND1, CDC42, CFL1, CNTFR, DUSP6, FLT3, FOS, GRB2, HCK, HLA-A, IL12B, IL21, IL2RB, IL31RA, IRAK3, IRF2, IRF8, JUN, JUNB, LCP1, LYN, MCL1, NCAM1, NUP160, PIK3CD, PIK3R3, PIM1, PTPN18, PTPN6, PTPRJ, RAP1B, S1PR1, SOCS1, SOCS3, SYK, TIFA, TNFRSF11B, TNFRSF1A, UBB]
R-HSA:1280218	Adaptive Immune System	REACTOME_Pathways_18.08.2022	7.52809e-09	4.84809e-06	3.97206e-19	1.90659e-17	[-1]	Group27	4.94148	38	[AKT3, BLNK, BTK, CAPZA1, CBLB, CD209, CD74, CDC42, CTSK, CTSS, CYBA, DAPP1, FYB1, GRB2, HCST, HLA-A, HLA-DOB, HUWE1, LYN, MYLIP, NCF1, NCK1, PIK3AP1, PIK3CD, PIK3R3, PRKCB, PTPN6, PTPRC, PTPRJ, RAP1B, RAP1GAP2, SH3KBP1, SOCS1, SOCS3, SYK, TLR6, UBB, UBE2E2]
R-HSA:168249	Innate Immune System	REACTOME_Pathways_18.08.2022	3.9124e-13	2.62522e-10	3.97206e-19	1.90659e-17	[-1]	Group27	5.145	55	[ABI1, ACTB, ARHGAP45, ARPC1B, ARPC4, ARPC5, BTK, CAPZA1, CD209, CD53, CDC42, CFL1, CTSK, CTSS, CYBA, CYFIP1, DBNL, DUSP6, FCER1G, FGR, FOS, GM2A, GRB2, GRN, HCK, HLA-A, HSP90AB1, HSPA1A, HUWE1, IRAK3, JUN, LYN, NCF1, NCK1, PDXK, PLEKHO2, PSAP, PTPN6, PTPRC, PTPRJ, RAC2, RAP1B, RHOG, SIGLEC15, SLC15A4, SOCS1, SYK, TIFA, TIMP2, TLR6, TLR8, UBB, UNC93B1, WASF2, WIPF1]
R-HSA:168256	Immune System	REACTOME_Pathways_18.08.2022	3.97206e-19	2.72086e-16	3.97206e-19	1.90659e-17	[-1]	Group27	4.60168	93	[ABI1, ACTB, AKT3, ARHGAP45, ARPC1B, ARPC4, ARPC5, BCL6, BLNK, BTK, CAPZA1, CBLB, CCL19, CCND1, CD209, CD53, CD74, CDC42, CFL1, CNTFR, CTSK, CTSS, CYBA, CYFIP1, DAPP1, DBNL, DUSP6, FCER1G, FGR, FLT3, FOS, FYB1, GM2A, GRB2, GRN, HCK, HCST, HLA-A, HLA-DOB, HSP90AB1, HSPA1A, HUWE1, IL12B, IL21, IL2RB, IL31RA, IRAK3, IRF2, IRF8, JUN, JUNB, LCP1, LYN, MCL1, MYLIP, NCAM1, NCF1, NCK1, NUP160, PDXK, PIK3…
R-HSA:449147	Signaling by Interleukins	REACTOME_Pathways_18.08.2022	5.6956e-13	3.79896e-10	3.97206e-19	1.90659e-17	[-1]	Group27	7.39958	35	[BCL6, BLNK, CAPZA1, CCL19, CCND1, CDC42, CFL1, CNTFR, DUSP6, FOS, GRB2, HCK, IL12B, IL21, IL2RB, IL31RA, IRAK3, JUN, JUNB, LCP1, LYN, MCL1, PIK3CD, PIK3R3, PIM1, PTPN18, PTPN6, RAP1B, S1PR1, SOCS1, SOCS3, SYK, TIFA, TNFRSF1A, UBB]
R-HSA:512988	Interleukin-3, Interleukin-5 and GM-CSF signaling	REACTOME_Pathways_18.08.2022	8.26837e-09	5.31656e-06	3.97206e-19	1.90659e-17	[-1]	Group27	20.8333	10	[BLNK, GRB2, HCK, IL2RB, LYN, PIK3CD, PIK3R3, PTPN6, SYK, UBB]
R-HSA:6785807	Interleukin-4 and Interleukin-13 signaling	REACTOME_Pathways_18.08.2022	1.94334e-05	0.00993045	3.97206e-19	1.90659e-17	[-1]	Group27	9.25926	10	[BCL6, CCND1, FOS, IL12B, JUNB, MCL1, PIM1, S1PR1, SOCS1, SOCS3]
GO:0010942	positive regulation of cell death	GO_BiologicalProcess-EBI-UniProt-GOA-ACAP-ARAP_05.04.2022_00h00	1.03732e-06	0.000613055	6.73648e-18	3.03141e-16	[3, 4, 5]	Group28	4.76974	29	[ATF3, ATF4, BCL6, BIN1, CDC42, DAB2IP, DDIT4, DUSP6, FOS, GADD45B, GRN, IL12B, JUN, LYN, MCL1, MRTFA, NCK1, NET1, PIK3CD, PLEKHF1, PTPRC, RAPGEF2, SKIL, SLC9A3R1, STK17B, SYK, TLR6, TNFRSF1A, UBB]
GO:0035556	intracellular signal transduction	GO_BiologicalProcess-EBI-UniProt-GOA-ACAP-ARAP_05.04.2022_00h00	9.84836e-21	6.75598e-18	6.73648e-18	3.03141e-16	[3, 4, 5]	Group28	4.15027	116	[ADRB2, AKT3, ANK2, ARHGAP12, ARHGAP17, ARHGAP29, ARHGAP4, ARHGAP45, ARHGDIA, ARHGDIG, ARHGEF15, ATF3, ATF4, BCL2L10, BCL6, BLNK, BTK, CADM4, CBLB, CCL19, CCND1, CD209, CD74, CDC42, CFL1, CMKLR1, CNOT6, CYFIP1, CYRIB, CYTH4, DAB2IP, DBNL, DDIT4, DDX5, DEF6, DOCK10, DOK2, DUSP1, DUSP6, ERBIN, FGD4, FGR, FLT3, GABARAP, GADD45B, GNAI1, GPX1, GRB2, HCLS1, HCST, HIPK3, HSP90AB1, HSPA1A, HSPB1, IL12B, …
GO:0043068	positive regulation of programmed cell death	GO_BiologicalProcess-EBI-UniProt-GOA-ACAP-ARAP_05.04.2022_00h00	2.8283e-06	0.00160082	6.73648e-18	3.03141e-16	[4, 5, 6]	Group28	4.85075	26	[ATF3, ATF4, BCL6, BIN1, CDC42, DAB2IP, DUSP6, GADD45B, GRN, IL12B, JUN, LYN, MCL1, MRTFA, NCK1, NET1, PIK3CD, PLEKHF1, PTPRC, RAPGEF2, SKIL, SLC9A3R1, STK17B, SYK, TNFRSF1A, UBB]
GO:1902531	regulation of intracellular signal transduction	GO_BiologicalProcess-EBI-UniProt-GOA-ACAP-ARAP_05.04.2022_00h00	7.71142e-16	5.25148e-13	6.73648e-18	3.03141e-16	[4, 5, 6]	Group28	4.48009	81	[ADRB2, AKT3, ARHGAP12, ARHGAP17, ARHGAP29, ARHGAP4, ARHGAP45, ARHGDIA, ARHGEF15, ATF3, BCL2L10, BCL6, CADM4, CCL19, CD74, CDC42, CMKLR1, CYRIB, CYTH4, DAB2IP, DDIT4, DDX5, DEF6, DUSP1, DUSP6, ERBIN, FGD4, FGR, FLT3, GABARAP, GADD45B, GNAI1, GPX1, GRB2, HCLS1, HCST, HIPK3, HSP90AB1, HSPA1A, HSPB1, IL12B, IQSEC1, IRAK3, JUN, LPAR6, LYN, MCL1, NCF1, NCK1, NET1, PIK3AP1, PIK3CD, PLEK, PLEKHF1, PLXNB…
GO:1902533	positive regulation of intracellular signal transduction	GO_BiologicalProcess-EBI-UniProt-GOA-ACAP-ARAP_05.04.2022_00h00	2.49279e-09	1.61782e-06	6.73648e-18	3.03141e-16	[4, 5, 6, 7]	Group28	4.48046	47	[ADRB2, AKT3, CCL19, CD74, CDC42, DAB2IP, DDX5, ERBIN, FGR, FLT3, GADD45B, GPX1, HCLS1, HCST, HSP90AB1, HSPA1A, IL12B, JUN, LPAR6, LYN, MCL1, NCF1, NCK1, NET1, PIK3AP1, PIK3CD, PLEKHF1, PLXNB1, PRKCB, PTPN6, PTPRC, PTPRJ, RAP1B, RAPGEF2, SASH1, SEMA7A, SKIL, SLC15A4, SLC9A3R1, SPI1, SYK, TCIM, TIFA, TLR6, TNFRSF1A, UBB, ZNF385A]
GO:0043549	regulation of kinase activity	GO_BiologicalProcess-EBI-UniProt-GOA-ACAP-ARAP_05.04.2022_00h00	8.18941e-07	0.000491365	6.73648e-18	3.03141e-16	[5, 7, 8]	Group28	4.32692	36	[ABI1, ACTB, ADRB2, AFAP1L2, CAMK1, CBLB, CCL19, CCND1, CD74, CDC42, DAB2IP, DUSP1, FGR, FLT3, GADD45B, HIPK3, HSP90AB1, HSPB1, IL12B, IRAK3, LYN, NCF1, PIK3R3, PTPN6, PTPRC, PTPRJ, RAPGEF2, RGS2, SASH1, SLC9A3R1, SOCS1, SOCS3, SYK, TCIM, TLR6, YWHAG]
GO:0001932	regulation of protein phosphorylation	GO_BiologicalProcess-EBI-UniProt-GOA-ACAP-ARAP_05.04.2022_00h00	4.55099e-08	2.88533e-05	6.73648e-18	3.03141e-16	[6, 7, 8]	Group28	4.07125	48	[ABI1, ACTB, ADRB2, AFAP1L2, CADM4, CAMK1, CBLB, CCL19, CCND1, CD74, DAB2IP, DDIT4, DUSP1, DUSP6, FGR, FLT3, GADD45B, HCLS1, HIPK3, HSP90AB1, HSPA2, HSPB1, IL12B, IL21, IL31RA, IRAK3, JUN, LYN, NCF1, NCK1, PIK3R3, PLPP3, PTPN6, PTPRC, PTPRJ, RAPGEF2, RGS2, SASH1, SEMA7A, SLC9A3R1, SOCS1, SOCS3, SYK, TCIM, TLR6, TLR8, TNFRSF1A, YWHAG]
R-HSA:114604	GPVI-mediated activation cascade	REACTOME_Pathways_18.08.2022	1.22996e-07	7.69954e-05	1.33875e-14	5.35499e-13	[-1]	Group29	22.8571	8	[CDC42, FCER1G, LYN, PIK3R3, PTPN6, RAC2, RHOG, SYK]
R-HSA:2871796	FCERI mediated MAPK activation	REACTOME_Pathways_18.08.2022	1.66477e-05	0.00867344	1.33875e-14	5.35499e-13	[-1]	Group29	18.75	6	[FCER1G, FOS, GRB2, JUN, LYN, SYK]
R-HSA:912631	Regulation of signaling by CBL	REACTOME_Pathways_18.08.2022	2.03614e-09	1.32349e-06	1.33875e-14	5.35499e-13	[-1]	Group29	36.3636	8	[BLNK, GRB2, HCK, LYN, PIK3CD, PIK3R3, SYK, UBB]
R-HSA:9674555	Signaling by CSF3 (G-CSF)	REACTOME_Pathways_18.08.2022	6.65213e-07	0.000402454	1.33875e-14	5.35499e-13	[-1]	Group29	23.3333	7	[GRB2, HCK, LYN, SOCS1, SOCS3, SYK, UBB]
GO:0038093	Fc receptor signaling pathway	GO_BiologicalProcess-EBI-UniProt-GOA-ACAP-ARAP_05.04.2022_00h00	9.15489e-06	0.00488871	1.33875e-14	5.35499e-13	[5, 6, 7]	Group29	13.3333	8	[BTK, FCER1G, FGR, HCK, LYN, PTPRC, PTPRJ, SYK]
GO:0002431	Fc receptor mediated stimulatory signaling pathway	GO_BiologicalProcess-EBI-UniProt-GOA-ACAP-ARAP_05.04.2022_00h00	2.03876e-06	0.00117433	1.33875e-14	5.35499e-13	[5, 6, 7, 8, 9]	Group29	20	7	[FCER1G, FGR, HCK, LYN, PTPRC, PTPRJ, SYK]
GO:0038094	Fc-gamma receptor signaling pathway	GO_BiologicalProcess-EBI-UniProt-GOA-ACAP-ARAP_05.04.2022_00h00	3.6583e-06	0.00205962	1.33875e-14	5.35499e-13	[6, 7, 8]	Group29	18.4211	7	[FCER1G, FGR, HCK, LYN, PTPRC, PTPRJ, SYK]
R-HSA:1433557	Signaling by SCF-KIT	REACTOME_Pathways_18.08.2022	9.5317e-05	0.0437505	1.80538e-10	4.51346e-09	[-1]	Group30	13.9535	6	[FES, GRB2, LYN, PIK3R3, PTPN6, SOCS1]
R-HSA:2219528	PI3K/AKT Signaling in Cancer	REACTOME_Pathways_18.08.2022	8.61443e-05	0.039971	1.80538e-10	4.51346e-09	[-1]	Group30	8.65385	9	[AKT3, FLT3, GAB1, GRB2, PIK3AP1, PIK3CD, PIK3R3, RAC2, RHOG]
R-HSA:2219530	Constitutive Signaling by Aberrant PI3K in Cancer	REACTOME_Pathways_18.08.2022	6.39324e-05	0.0304318	1.80538e-10	4.51346e-09	[-1]	Group30	10.2564	8	[FLT3, GAB1, GRB2, PIK3AP1, PIK3CD, PIK3R3, RAC2, RHOG]
R-HSA:451927	Interleukin-2 family signaling	REACTOME_Pathways_18.08.2022	1.01552e-05	0.00541274	1.80538e-10	4.51346e-09	[-1]	Group30	15.9091	7	[GRB2, IL21, IL2RB, PIK3CD, PIK3R3, PTPN6, SYK]
R-HSA:512988	Interleukin-3, Interleukin-5 and GM-CSF signaling	REACTOME_Pathways_18.08.2022	8.26837e-09	5.31656e-06	1.80538e-10	4.51346e-09	[-1]	Group30	20.8333	10	[BLNK, GRB2, HCK, IL2RB, LYN, PIK3CD, PIK3R3, PTPN6, SYK, UBB]
R-HSA:912526	Interleukin receptor SHC signaling	REACTOME_Pathways_18.08.2022	9.23234e-05	0.0425611	1.80538e-10	4.51346e-09	[-1]	Group30	18.5185	5	[GRB2, IL2RB, PIK3CD, PIK3R3, PTPN6]
R-HSA:912631	Regulation of signaling by CBL	REACTOME_Pathways_18.08.2022	2.03614e-09	1.32349e-06	1.80538e-10	4.51346e-09	[-1]	Group30	36.3636	8	[BLNK, GRB2, HCK, LYN, PIK3CD, PIK3R3, SYK, UBB]
R-HSA:194315	Signaling by Rho GTPases	REACTOME_Pathways_18.08.2022	5.25074e-16	3.581e-13	1.31956e-17	5.80609e-16	[-1]	Group31	6.78925	48	[ABI1, ACTB, ACTN1, ARAP3, ARHGAP12, ARHGAP17, ARHGAP29, ARHGAP4, ARHGAP45, ARHGDIA, ARHGDIG, ARHGEF15, ARPC1B, ARPC4, ARPC5, BTK, CDC42, CFL1, CKB, CYBA, CYFIP1, DEF6, DOCK10, ERBIN, FGD4, FMNL1, FNBP1L, GRB2, HSP90AB1, MRTFA, MSI2, NCF1, NCK1, NET1, NUP160, PIK3R3, PLXNB1, PRKCB, RAC2, RHOG, SRGAP2, TAGAP, TIAM1, TMEM59, TPM3, WASF2, WIPF1, YWHAG]
R-HSA:195258	RHO GTPase Effectors	REACTOME_Pathways_18.08.2022	1.65394e-08	1.05852e-05	1.31956e-17	5.80609e-16	[-1]	Group31	7.03364	23	[ABI1, ACTB, ARPC1B, ARPC4, ARPC5, BTK, CDC42, CFL1, CYBA, CYFIP1, FMNL1, GRB2, MRTFA, NCF1, NCK1, NUP160, PRKCB, RAC2, RHOG, SRGAP2, WASF2, WIPF1, YWHAG]
R-HSA:9012999	RHO GTPase cycle	REACTOME_Pathways_18.08.2022	1.19251e-16	8.14485e-14	1.31956e-17	5.80609e-16	[-1]	Group31	8.68597	39	[ABI1, ACTB, ACTN1, ARAP3, ARHGAP12, ARHGAP17, ARHGAP29, ARHGAP4, ARHGAP45, ARHGDIA, ARHGDIG, ARHGEF15, CDC42, CKB, CYBA, CYFIP1, DEF6, DOCK10, ERBIN, FGD4, FMNL1, FNBP1L, GRB2, HSP90AB1, MSI2, NCF1, NCK1, NET1, PIK3R3, PLXNB1, RAC2, RHOG, SRGAP2, TAGAP, TIAM1, TMEM59, TPM3, WASF2, WIPF1]
R-HSA:9013148	CDC42 GTPase cycle	REACTOME_Pathways_18.08.2022	2.40359e-10	1.57435e-07	1.31956e-17	5.80609e-16	[-1]	Group31	11.6129	18	[ARAP3, ARHGAP17, ARHGAP29, ARHGAP4, ARHGAP45, ARHGDIA, ARHGDIG, ARHGEF15, CDC42, DEF6, DOCK10, FGD4, FMNL1, FNBP1L, SRGAP2, TAGAP, TIAM1, WIPF1]
R-HSA:9013149	RAC1 GTPase cycle	REACTOME_Pathways_18.08.2022	1.67303e-13	1.12428e-10	1.31956e-17	5.80609e-16	[-1]	Group31	12.4324	23	[ABI1, ARAP3, ARHGAP12, ARHGAP17, ARHGAP29, ARHGAP4, ARHGAP45, ARHGDIA, ARHGEF15, CDC42, CYBA, CYFIP1, DEF6, DOCK10, ERBIN, FMNL1, NCF1, PIK3R3, SRGAP2, TAGAP, TIAM1, WASF2, WIPF1]
R-HSA:9716542	Signaling by Rho GTPases, Miro GTPases and RHOBTB3	REACTOME_Pathways_18.08.2022	1.25207e-15	8.51405e-13	1.31956e-17	5.80609e-16	[-1]	Group31	6.639	48	[ABI1, ACTB, ACTN1, ARAP3, ARHGAP12, ARHGAP17, ARHGAP29, ARHGAP4, ARHGAP45, ARHGDIA, ARHGDIG, ARHGEF15, ARPC1B, ARPC4, ARPC5, BTK, CDC42, CFL1, CKB, CYBA, CYFIP1, DEF6, DOCK10, ERBIN, FGD4, FMNL1, FNBP1L, GRB2, HSP90AB1, MRTFA, MSI2, NCF1, NCK1, NET1, NUP160, PIK3R3, PLXNB1, PRKCB, RAC2, RHOG, SRGAP2, TAGAP, TIAM1, TMEM59, TPM3, WASF2, WIPF1, YWHAG]
GO:0007264	small GTPase mediated signal transduction	GO_BiologicalProcess-EBI-UniProt-GOA-ACAP-ARAP_05.04.2022_00h00	4.52663e-13	3.03284e-10	1.31956e-17	5.80609e-16	[4, 5, 6]	Group31	6.90909	38	[ARHGAP12, ARHGAP17, ARHGAP29, ARHGAP4, ARHGAP45, ARHGDIA, ARHGDIG, ARHGEF15, BCL6, CADM4, CDC42, CFL1, CYFIP1, CYRIB, CYTH4, DAB2IP, DBNL, DEF6, DOCK10, DOK2, ERBIN, FGD4, GABARAP, GRB2, IQSEC1, JUN, LPAR6, MRAS, NET1, RAC2, RAP1B, RAP1GAP2, RAPGEF2, RHOG, SRGAP2, TAGAP, TIAM1, WASF2]
R-HSA:194138	Signaling by VEGF	REACTOME_Pathways_18.08.2022	2.94551e-06	0.00166422	2.77735e-18	1.27758e-16	[-1]	Group32	10.1852	11	[ABI1, ACTB, AKT3, CDC42, CYBA, CYFIP1, HSPB1, NCF1, NCK1, PRKCB, WASF2]
R-HSA:4420097	VEGFA-VEGFR2 Pathway	REACTOME_Pathways_18.08.2022	1.23701e-06	0.00072489	2.77735e-18	1.27758e-16	[-1]	Group32	11.1111	11	[ABI1, ACTB, AKT3, CDC42, CYBA, CYFIP1, HSPB1, NCF1, NCK1, PRKCB, WASF2]
R-HSA:9012999	RHO GTPase cycle	REACTOME_Pathways_18.08.2022	1.19251e-16	8.14485e-14	2.77735e-18	1.27758e-16	[-1]	Group32	8.68597	39	[ABI1, ACTB, ACTN1, ARAP3, ARHGAP12, ARHGAP17, ARHGAP29, ARHGAP4, ARHGAP45, ARHGDIA, ARHGDIG, ARHGEF15, CDC42, CKB, CYBA, CYFIP1, DEF6, DOCK10, ERBIN, FGD4, FMNL1, FNBP1L, GRB2, HSP90AB1, MSI2, NCF1, NCK1, NET1, PIK3R3, PLXNB1, RAC2, RHOG, SRGAP2, TAGAP, TIAM1, TMEM59, TPM3, WASF2, WIPF1]
R-HSA:9013149	RAC1 GTPase cycle	REACTOME_Pathways_18.08.2022	1.67303e-13	1.12428e-10	2.77735e-18	1.27758e-16	[-1]	Group32	12.4324	23	[ABI1, ARAP3, ARHGAP12, ARHGAP17, ARHGAP29, ARHGAP4, ARHGAP45, ARHGDIA, ARHGEF15, CDC42, CYBA, CYFIP1, DEF6, DOCK10, ERBIN, FMNL1, NCF1, PIK3R3, SRGAP2, TAGAP, TIAM1, WASF2, WIPF1]
R-HSA:9013404	RAC2 GTPase cycle	REACTOME_Pathways_18.08.2022	3.67755e-10	2.40512e-07	2.77735e-18	1.27758e-16	[-1]	Group32	15.9091	14	[ABI1, ARHGAP17, ARHGDIA, CDC42, CYBA, CYFIP1, DEF6, DOCK10, ERBIN, NCF1, PIK3R3, RAC2, TIAM1, WASF2]
R-HSA:9013423	RAC3 GTPase cycle	REACTOME_Pathways_18.08.2022	8.61957e-08	5.42171e-05	2.77735e-18	1.27758e-16	[-1]	Group32	12.766	12	[ABI1, ARAP3, ARHGAP17, CDC42, CYBA, CYFIP1, DOCK10, ERBIN, NCF1, SRGAP2, TIAM1, WASF2]
GO:0097581	lamellipodium organization	GO_BiologicalProcess-EBI-UniProt-GOA-ACAP-ARAP_05.04.2022_00h00	6.80651e-06	0.00370274	2.77735e-18	1.27758e-16	[6]	Group32	10.4167	10	[ABI1, ARPC5, CDC42, CYFIP1, FGD4, NCK1, RAC2, S1PR1, SRGAP2, WASF2]
GO:0016601	Rac protein signal transduction	GO_BiologicalProcess-EBI-UniProt-GOA-ACAP-ARAP_05.04.2022_00h00	6.83811e-08	4.32169e-05	2.77735e-18	1.27758e-16	[6, 7, 8]	Group32	20	9	[ARHGAP17, CADM4, CYFIP1, DBNL, GABARAP, RAC2, RHOG, TIAM1, WASF2]
GO:0002699	positive regulation of immune effector process	GO_BiologicalProcess-EBI-UniProt-GOA-ACAP-ARAP_05.04.2022_00h00	2.81206e-07	0.000173504	2.78394e-10	6.40306e-09	[3, 4, 5]	Group33	7.0632	19	[BTK, CADM1, CCL19, CD74, CYRIB, FES, FGR, HLA-A, IL12B, IL21, LYN, MYO18A, PTPN6, PTPRC, PTPRJ, RAC2, SEMA7A, SPI1, SYK]
GO:0032103	positive regulation of response to external stimulus	GO_BiologicalProcess-EBI-UniProt-GOA-ACAP-ARAP_05.04.2022_00h00	3.60633e-05	0.0178513	2.78394e-10	6.40306e-09	[3, 4, 5]	Group33	4.61216	22	[BTK, CADM1, CCL19, CD74, CMKLR1, CNOT6, CYBA, GRN, HCK, HSPB1, IL12B, IL21, LCP1, LYN, RAC2, S1PR1, SASH1, SLC15A4, SPI1, SYK, TLR8, TNFRSF1A]
GO:0050778	positive regulation of immune response	GO_BiologicalProcess-EBI-UniProt-GOA-ACAP-ARAP_05.04.2022_00h00	3.93765e-05	0.0193732	2.78394e-10	6.40306e-09	[3, 4, 5]	Group33	4.14747	27	[BLNK, BTK, CADM1, CBLB, CCL19, CD74, CMKLR1, CYRIB, FCER1G, FGR, FYB1, HCK, HLA-A, IL12B, IL21, LYN, NCOR2, PIK3CD, PRKCB, PTPN6, PTPRC, PTPRJ, SLC15A4, SPI1, SYK, TLR8, TNFRSF21]
GO:0050920	regulation of chemotaxis	GO_BiologicalProcess-EBI-UniProt-GOA-ACAP-ARAP_05.04.2022_00h00	6.77953e-06	0.00369485	2.78394e-10	6.40306e-09	[3, 4, 5]	Group33	6.53061	16	[CCL19, CD74, CMKLR1, CNOT6, CYRIB, DUSP1, HSPB1, LYN, MYCBP2, PLXNA3, RAC2, S1PR1, SEMA4A, SEMA6C, SEMA7A, SPI1]
GO:0002703	regulation of leukocyte mediated immunity	GO_BiologicalProcess-EBI-UniProt-GOA-ACAP-ARAP_05.04.2022_00h00	6.77953e-06	0.00369485	2.78394e-10	6.40306e-09	[4, 5]	Group33	6.53061	16	[BCL6, BTK, CADM1, CYRIB, FES, FGR, HLA-A, IL12B, IL21, LYN, PTPN6, PTPRC, RAC2, SLC15A4, SPI1, SYK]
GO:0046651	lymphocyte proliferation	GO_BiologicalProcess-EBI-UniProt-GOA-ACAP-ARAP_05.04.2022_00h00	1.15395e-05	0.00610442	2.78394e-10	6.40306e-09	[4, 5]	Group33	5.71429	18	[BCL6, BTK, CADM1, CBLB, CCL19, CD209, CD74, FLT3, HLA-A, IL12B, IL21, LYN, NCK1, PTPN6, PTPRC, RAC2, SYK, TNFRSF21]
GO:0060326	cell chemotaxis	GO_BiologicalProcess-EBI-UniProt-GOA-ACAP-ARAP_05.04.2022_00h00	2.65066e-06	0.00151088	2.78394e-10	6.40306e-09	[4, 5]	Group33	5.84795	20	[BSG, CCL19, CD74, CH25H, CMKLR1, CNOT6, CXCL9, DUSP1, FCER1G, GAB1, HSPB1, LYN, PIK3CD, RAC2, RHOG, S1PR1, SLC12A2, SPI1, SYK, XCR1]
GO:0045088	regulation of innate immune response	GO_BiologicalProcess-EBI-UniProt-GOA-ACAP-ARAP_05.04.2022_00h00	6.43691e-06	0.00352742	2.78394e-10	6.40306e-09	[4, 5, 6, 7]	Group33	6.55738	16	[CADM1, FGR, GRN, HCK, HLA-A, IL12B, IL21, IRAK3, LYN, NCF1, PTPN6, SLC15A4, SOCS1, SPI1, SYK, TLR8]
GO:0002285	lymphocyte activation involved in immune response	GO_BiologicalProcess-EBI-UniProt-GOA-ACAP-ARAP_05.04.2022_00h00	5.61491e-06	0.00309381	4.11791e-16	1.68834e-14	[4, 5]	Group34	7.00935	15	[BCL6, CCL19, CD74, DOCK10, FCER1G, IL12B, IL21, IRF8, JUNB, LCP1, MFNG, PTPRC, SEMA4A, SLC15A4, SPI1]
GO:0042110	T cell activation	GO_BiologicalProcess-EBI-UniProt-GOA-ACAP-ARAP_05.04.2022_00h00	2.33457e-08	1.48712e-05	4.11791e-16	1.68834e-14	[4, 5]	Group34	5.4386	31	[ACTB, BCL6, CADM1, CBLB, CCL19, CD209, CD74, CDK6, CYRIB, FCER1G, HLA-A, HLA-DOB, HSPH1, IL12B, IL21, JUNB, LCP1, LYN, NCK1, NCOR2, PIK3CD, PIK3R3, PTPN6, PTPRC, RAC2, SEMA4A, SOCS1, SPI1, SYK, TNFRSF21, ZFP36L1]
GO:0046631	alpha-beta T cell activation	GO_BiologicalProcess-EBI-UniProt-GOA-ACAP-ARAP_05.04.2022_00h00	1.19748e-05	0.00632267	4.11791e-16	1.68834e-14	[5, 6]	Group34	7.47126	13	[BCL6, CBLB, CCL19, HLA-A, HSPH1, IL12B, IL21, JUNB, NCOR2, PTPRC, SEMA4A, SOCS1, SYK]
GO:0002521	leukocyte differentiation	GO_BiologicalProcess-EBI-UniProt-GOA-ACAP-ARAP_05.04.2022_00h00	1.0498e-13	7.06515e-11	4.11791e-16	1.68834e-14	[4, 5, 6, 7, 8]	Group34	6.75453	41	[ACTB, BATF3, BCL6, BLNK, BTK, CCL19, CD74, CDC42, CDK6, CMTM7, DOCK10, FCER1G, FES, FLT3, FOS, HCLS1, ID2, IKZF1, IL12B, IL21, IL31RA, IRF2BP2, IRF8, JUN, JUNB, KLF6, LYN, MFNG, PIK3CD, PIK3R3, PTPN6, PTPRC, PTPRJ, SEMA4A, SIGLEC15, SOCS1, SPI1, SYK, TMEM178A, TNFRSF11B, ZFP36L1]
GO:0030098	lymphocyte differentiation	GO_BiologicalProcess-EBI-UniProt-GOA-ACAP-ARAP_05.04.2022_00h00	1.01859e-10	6.69213e-08	4.11791e-16	1.68834e-14	[4, 5, 6, 7, 8, 9, 10]	Group34	7.02576	30	[ACTB, BCL6, BLNK, BTK, CCL19, CD74, CDK6, CMTM7, DOCK10, FCER1G, FLT3, ID2, IKZF1, IL12B, IL21, IRF2BP2, IRF8, JUNB, KLF6, MFNG, PIK3CD, PIK3R3, PTPN6, PTPRC, PTPRJ, SEMA4A, SOCS1, SPI1, SYK, ZFP36L1]
GO:1903131	mononuclear cell differentiation	GO_BiologicalProcess-EBI-UniProt-GOA-ACAP-ARAP_05.04.2022_00h00	8.71071e-13	5.80133e-10	4.11791e-16	1.68834e-14	[5, 6, 7, 8, 9]	Group34	7.29167	35	[ACTB, BATF3, BCL6, BLNK, BTK, CCL19, CD74, CDK6, CMTM7, DOCK10, FCER1G, FES, FLT3, ID2, IKZF1, IL12B, IL21, IL31RA, IRF2BP2, IRF8, JUN, JUNB, KLF6, LYN, MFNG, PIK3CD, PIK3R3, PTPN6, PTPRC, PTPRJ, SEMA4A, SOCS1, SPI1, SYK, ZFP36L1]
GO:0030217	T cell differentiation	GO_BiologicalProcess-EBI-UniProt-GOA-ACAP-ARAP_05.04.2022_00h00	2.77482e-05	0.0139296	4.11791e-16	1.68834e-14	[5, 6, 7, 8, 9, 10, 11]	Group34	5.57377	17	[ACTB, BCL6, CCL19, CD74, CDK6, FCER1G, IL12B, IL21, JUNB, PIK3CD, PIK3R3, PTPRC, SEMA4A, SOCS1, SPI1, SYK, ZFP36L1]
GO:0002335	mature B cell differentiation	GO_BiologicalProcess-EBI-UniProt-GOA-ACAP-ARAP_05.04.2022_00h00	2.85345e-05	0.0142958	4.11791e-16	1.68834e-14	[6, 7, 8, 9, 10, 11, 12]	Group34	17.1429	6	[CMTM7, DOCK10, IL21, IRF8, MFNG, SPI1]
R-HSA:3371497	HSP90 chaperone cycle for steroid hormone receptors (SHR) in the presence of ligand	REACTOME_Pathways_18.08.2022	4.56375e-05	0.0222711	2.25869e-08	3.83977e-07	[-1]	Group35	12.7273	7	[CAPZA1, DNAJB1, FKBP5, HSP90AB1, HSPA1A, HSPA1L, HSPA2]
R-HSA:3371568	Attenuation phase	REACTOME_Pathways_18.08.2022	2.75864e-06	0.00156691	2.25869e-08	3.83977e-07	[-1]	Group35	35.7143	5	[DNAJB1, HSP90AB1, HSPA1A, HSPA1L, HSPA2]
R-HSA:3371571	HSF1-dependent transactivation	REACTOME_Pathways_18.08.2022	5.07401e-05	0.0246597	2.25869e-08	3.83977e-07	[-1]	Group35	20.8333	5	[DNAJB1, HSP90AB1, HSPA1A, HSPA1L, HSPA2]
GO:0006986	response to unfolded protein	GO_BiologicalProcess-EBI-UniProt-GOA-ACAP-ARAP_05.04.2022_00h00	1.96756e-07	0.000122186	2.25869e-08	3.83977e-07	[4, 5]	Group35	9.85915	14	[ATF3, ATF4, CCND1, DAB2IP, DNAJB1, HSP90AB1, HSPA1A, HSPA1L, HSPA2, HSPB1, HSPH1, NCK1, PPP1R15A, TRAM1]
GO:0051085	chaperone cofactor-dependent protein refolding	GO_BiologicalProcess-EBI-UniProt-GOA-ACAP-ARAP_05.04.2022_00h00	1.66477e-05	0.00867344	2.25869e-08	3.83977e-07	[4, 5]	Group35	18.75	6	[CD74, DNAJB1, HSPA1A, HSPA1L, HSPA2, HSPH1]
GO:0034620	cellular response to unfolded protein	GO_BiologicalProcess-EBI-UniProt-GOA-ACAP-ARAP_05.04.2022_00h00	7.40308e-05	0.0348685	2.25869e-08	3.83977e-07	[5, 6]	Group35	8.82353	9	[ATF3, ATF4, CCND1, DAB2IP, HSPA1A, HSPA1L, HSPA2, NCK1, PPP1R15A]
GO:0090084	negative regulation of inclusion body assembly	GO_BiologicalProcess-EBI-UniProt-GOA-ACAP-ARAP_05.04.2022_00h00	2.72573e-05	0.0137377	2.25869e-08	3.83977e-07	[4, 5, 6, 7]	Group35	36.3636	4	[DNAJB1, DNAJB8, HSPA1A, HSPA2]
GO:0043620	regulation of DNA-templated transcription in response to stress	GO_BiologicalProcess-EBI-UniProt-GOA-ACAP-ARAP_05.04.2022_00h00	4.56375e-05	0.0222711	2.25869e-08	3.83977e-07	[4, 6, 7, 8, 9, 10, 11]	Group35	12.7273	7	[ATF3, ATF4, DNAJB1, HSPA1A, JUN, NCK1, TCIM]
GO:0097201	negative regulation of transcription from RNA polymerase II promoter in response to stress	GO_BiologicalProcess-EBI-UniProt-GOA-ACAP-ARAP_05.04.2022_00h00	4.03243e-05	0.0197186	2.25869e-08	3.83977e-07	[6, 8, 9, 10, 11, 12, 13]	Group35	33.3333	4	[DNAJB1, HSPA1A, JUN, NCK1]
GO:0032103	positive regulation of response to external stimulus	GO_BiologicalProcess-EBI-UniProt-GOA-ACAP-ARAP_05.04.2022_00h00	3.60633e-05	0.0178513	3.50387e-13	1.29643e-11	[3, 4, 5]	Group36	4.61216	22	[BTK, CADM1, CCL19, CD74, CMKLR1, CNOT6, CYBA, GRN, HCK, HSPB1, IL12B, IL21, LCP1, LYN, RAC2, S1PR1, SASH1, SLC15A4, SPI1, SYK, TLR8, TNFRSF1A]
GO:0050920	regulation of chemotaxis	GO_BiologicalProcess-EBI-UniProt-GOA-ACAP-ARAP_05.04.2022_00h00	6.77953e-06	0.00369485	3.50387e-13	1.29643e-11	[3, 4, 5]	Group36	6.53061	16	[CCL19, CD74, CMKLR1, CNOT6, CYRIB, DUSP1, HSPB1, LYN, MYCBP2, PLXNA3, RAC2, S1PR1, SEMA4A, SEMA6C, SEMA7A, SPI1]
GO:0051272	positive regulation of cellular component movement	GO_BiologicalProcess-EBI-UniProt-GOA-ACAP-ARAP_05.04.2022_00h00	2.22337e-06	0.00127622	3.50387e-13	1.29643e-11	[3, 4, 5]	Group36	4.69012	28	[AKT3, BCL6, CCL19, CD74, CMKLR1, DAB2IP, FGR, GAB1, GRN, HSPB1, IQSEC1, JUN, LYN, PIK3CD, PIK3R3, PLPP3, PTPRC, RAC2, RAPGEF2, S1PR1, SASH1, SEMA4A, SEMA6C, SEMA7A, SMOX, SPI1, TIAM1, ZNF609]
GO:2000145	regulation of cell motility	GO_BiologicalProcess-EBI-UniProt-GOA-ACAP-ARAP_05.04.2022_00h00	4.43093e-09	2.86238e-06	3.50387e-13	1.29643e-11	[3, 4, 5]	Group36	4.45736	46	[AKT3, ARHGAP4, CADM4, CCL19, CD74, CDK6, CMKLR1, CYRIB, DAB2IP, DOCK10, DUSP1, FES, FGR, GAB1, GRN, HSPB1, IQSEC1, JUN, LYN, NAV3, NCK1, PIK3CD, PIK3R3, PLPP3, PLXNA3, PLXNB1, PLXNC1, PTPRC, PTPRJ, RAC2, RAPGEF2, RHOG, S1PR1, SASH1, SEMA4A, SEMA6C, SEMA7A, SGK3, SLC9A3R1, SMOX, SPI1, SPOCK3, SRGAP2, TIAM1, TPM1, ZNF609]
GO:0060326	cell chemotaxis	GO_BiologicalProcess-EBI-UniProt-GOA-ACAP-ARAP_05.04.2022_00h00	2.65066e-06	0.00151088	3.50387e-13	1.29643e-11	[4, 5]	Group36	5.84795	20	[BSG, CCL19, CD74, CH25H, CMKLR1, CNOT6, CXCL9, DUSP1, FCER1G, GAB1, HSPB1, LYN, PIK3CD, RAC2, RHOG, S1PR1, SLC12A2, SPI1, SYK, XCR1]
GO:2000147	positive regulation of cell motility	GO_BiologicalProcess-EBI-UniProt-GOA-ACAP-ARAP_05.04.2022_00h00	4.02944e-06	0.0022444	3.50387e-13	1.29643e-11	[3, 4, 5, 6]	Group36	4.64716	27	[AKT3, CCL19, CD74, CMKLR1, DAB2IP, FGR, GAB1, GRN, HSPB1, IQSEC1, JUN, LYN, PIK3CD, PIK3R3, PLPP3, PTPRC, RAC2, RAPGEF2, S1PR1, SASH1, SEMA4A, SEMA6C, SEMA7A, SMOX, SPI1, TIAM1, ZNF609]
GO:0030595	leukocyte chemotaxis	GO_BiologicalProcess-EBI-UniProt-GOA-ACAP-ARAP_05.04.2022_00h00	5.5556e-05	0.0268335	3.50387e-13	1.29643e-11	[3, 5, 6]	Group36	5.76923	15	[BSG, CCL19, CD74, CH25H, CMKLR1, CXCL9, DUSP1, FCER1G, LYN, PIK3CD, RAC2, S1PR1, SLC12A2, SPI1, SYK]
GO:0030334	regulation of cell migration	GO_BiologicalProcess-EBI-UniProt-GOA-ACAP-ARAP_05.04.2022_00h00	7.94022e-08	5.00234e-05	3.50387e-13	1.29643e-11	[4, 5, 6]	Group36	4.31212	42	[AKT3, ARHGAP4, CCL19, CD74, CMKLR1, CYRIB, DAB2IP, DOCK10, DUSP1, FGR, GAB1, GRN, HSPB1, IQSEC1, JUN, LYN, NAV3, NCK1, PIK3CD, PIK3R3, PLPP3, PLXNA3, PLXNB1, PLXNC1, PTPRC, PTPRJ, RAC2, RAPGEF2, RHOG, S1PR1, SASH1, SEMA4A, SEMA6C, SEMA7A, SGK3, SLC9A3R1, SMOX, SPI1, SRGAP2, TIAM1, TPM1, ZNF609]
GO:0030335	positive regulation of cell migration	GO_BiologicalProcess-EBI-UniProt-GOA-ACAP-ARAP_05.04.2022_00h00	1.96097e-06	0.00113148	3.50387e-13	1.29643e-11	[4, 5, 6, 7]	Group36	4.83005	27	[AKT3, CCL19, CD74, CMKLR1, DAB2IP, FGR, GAB1, GRN, HSPB1, IQSEC1, JUN, LYN, PIK3CD, PIK3R3, PLPP3, PTPRC, RAC2, RAPGEF2, S1PR1, SASH1, SEMA4A, SEMA6C, SEMA7A, SMOX, SPI1, TIAM1, ZNF609]
GO:0002520	immune system development	GO_BiologicalProcess-EBI-UniProt-GOA-ACAP-ARAP_05.04.2022_00h00	6.79809e-15	4.6091e-12	3.6546e-14	1.4253e-12	[2, 4, 5]	Group37	5.44601	58	[ABI1, ACTB, ACTN1, ATF4, BATF3, BCL6, BLNK, BTK, CBLB, CCL19, CD74, CDC42, CDK6, CMTM7, CNOT6, DOCK10, FCER1G, FES, FLT3, FOS, HCLS1, HSPA1A, ID2, IKZF1, IL12B, IL21, IL31RA, IRAK3, IRF2BP2, IRF8, JUN, JUNB, KLF6, LYN, MFNG, MKNK2, PIK3CD, PIK3R3, PIM1, PLEK, PTPN6, PTPRC, PTPRJ, RBM47, SEMA4A, SIGLEC15, SLC15A4, SOCS1, SPI1, SSBP3, SYK, TCIM, TIPARP, TMEM178A, TNFRSF11B, WASF2, ZFP36L1, ZNF385A]
GO:0042113	B cell activation	GO_BiologicalProcess-EBI-UniProt-GOA-ACAP-ARAP_05.04.2022_00h00	1.79231e-09	1.1668e-06	3.6546e-14	1.4253e-12	[4, 5]	Group37	7.04607	26	[BCL6, BLNK, BTK, CD74, CMTM7, DOCK10, FLT3, ID2, IL21, IRF2BP2, IRF8, KLF6, LYN, MFNG, PIK3CD, PIK3R3, PRKCB, PTPN6, PTPRC, PTPRJ, SH3KBP1, SLC15A4, SPI1, SYK, TNFRSF21, ZFP36L1]
GO:0048534	hematopoietic or lymphoid organ development	GO_BiologicalProcess-EBI-UniProt-GOA-ACAP-ARAP_05.04.2022_00h00	7.21119e-14	4.86755e-11	3.6546e-14	1.4253e-12	[3, 4, 5, 6]	Group37	5.43807	54	[ABI1, ACTB, ACTN1, ATF4, BATF3, BCL6, BLNK, BTK, CCL19, CD74, CDC42, CDK6, CMTM7, DOCK10, FCER1G, FES, FLT3, FOS, HCLS1, HSPA1A, ID2, IKZF1, IL12B, IL21, IL31RA, IRF2BP2, IRF8, JUN, JUNB, KLF6, LYN, MFNG, MKNK2, PIK3CD, PIK3R3, PIM1, PLEK, PTPN6, PTPRC, PTPRJ, RBM47, SEMA4A, SIGLEC15, SOCS1, SPI1, SSBP3, SYK, TCIM, TIPARP, TMEM178A, TNFRSF11B, WASF2, ZFP36L1, ZNF385A]
GO:0030097	hemopoiesis	GO_BiologicalProcess-EBI-UniProt-GOA-ACAP-ARAP_05.04.2022_00h00	1.17801e-14	7.96338e-12	3.6546e-14	1.4253e-12	[4, 5, 6, 7]	Group37	5.68421	54	[ABI1, ACTB, ACTN1, ATF4, BATF3, BCL6, BLNK, BTK, CCL19, CD74, CDC42, CDK6, CMTM7, DOCK10, FCER1G, FES, FLT3, FOS, HCLS1, HSPA1A, ID2, IKZF1, IL12B, IL21, IL31RA, IRF2BP2, IRF8, JUN, JUNB, KLF6, LYN, MFNG, MKNK2, PIK3CD, PIK3R3, PIM1, PLEK, PTPN6, PTPRC, PTPRJ, RBM47, SEMA4A, SIGLEC15, SOCS1, SPI1, SSBP3, SYK, TCIM, TIPARP, TMEM178A, TNFRSF11B, WASF2, ZFP36L1, ZNF385A]
GO:0002521	leukocyte differentiation	GO_BiologicalProcess-EBI-UniProt-GOA-ACAP-ARAP_05.04.2022_00h00	1.0498e-13	7.06515e-11	3.6546e-14	1.4253e-12	[4, 5, 6, 7, 8]	Group37	6.75453	41	[ACTB, BATF3, BCL6, BLNK, BTK, CCL19, CD74, CDC42, CDK6, CMTM7, DOCK10, FCER1G, FES, FLT3, FOS, HCLS1, ID2, IKZF1, IL12B, IL21, IL31RA, IRF2BP2, IRF8, JUN, JUNB, KLF6, LYN, MFNG, PIK3CD, PIK3R3, PTPN6, PTPRC, PTPRJ, SEMA4A, SIGLEC15, SOCS1, SPI1, SYK, TMEM178A, TNFRSF11B, ZFP36L1]
GO:0030098	lymphocyte differentiation	GO_BiologicalProcess-EBI-UniProt-GOA-ACAP-ARAP_05.04.2022_00h00	1.01859e-10	6.69213e-08	3.6546e-14	1.4253e-12	[4, 5, 6, 7, 8, 9, 10]	Group37	7.02576	30	[ACTB, BCL6, BLNK, BTK, CCL19, CD74, CDK6, CMTM7, DOCK10, FCER1G, FLT3, ID2, IKZF1, IL12B, IL21, IRF2BP2, IRF8, JUNB, KLF6, MFNG, PIK3CD, PIK3R3, PTPN6, PTPRC, PTPRJ, SEMA4A, SOCS1, SPI1, SYK, ZFP36L1]
GO:1903131	mononuclear cell differentiation	GO_BiologicalProcess-EBI-UniProt-GOA-ACAP-ARAP_05.04.2022_00h00	8.71071e-13	5.80133e-10	3.6546e-14	1.4253e-12	[5, 6, 7, 8, 9]	Group37	7.29167	35	[ACTB, BATF3, BCL6, BLNK, BTK, CCL19, CD74, CDK6, CMTM7, DOCK10, FCER1G, FES, FLT3, ID2, IKZF1, IL12B, IL21, IL31RA, IRF2BP2, IRF8, JUN, JUNB, KLF6, LYN, MFNG, PIK3CD, PIK3R3, PTPN6, PTPRC, PTPRJ, SEMA4A, SOCS1, SPI1, SYK, ZFP36L1]
GO:0030183	B cell differentiation	GO_BiologicalProcess-EBI-UniProt-GOA-ACAP-ARAP_05.04.2022_00h00	2.27748e-12	1.51452e-09	3.6546e-14	1.4253e-12	[5, 6, 7, 8, 9, 10, 11]	Group37	13.1579	20	[BCL6, BLNK, BTK, CMTM7, DOCK10, FLT3, ID2, IL21, IRF2BP2, IRF8, KLF6, MFNG, PIK3CD, PIK3R3, PTPN6, PTPRC, PTPRJ, SPI1, SYK, ZFP36L1]
GO:0002335	mature B cell differentiation	GO_BiologicalProcess-EBI-UniProt-GOA-ACAP-ARAP_05.04.2022_00h00	2.85345e-05	0.0142958	3.6546e-14	1.4253e-12	[6, 7, 8, 9, 10, 11, 12]	Group37	17.1429	6	[CMTM7, DOCK10, IL21, IRF8, MFNG, SPI1]
R-HSA:2029480	Fcgamma receptor (FCGR) dependent phagocytosis	REACTOME_Pathways_18.08.2022	7.28296e-15	4.93056e-12	8.23881e-11	2.14209e-09	[-1]	Group38	20.9302	18	[ABI1, ACTB, ARPC1B, ARPC4, ARPC5, BTK, CDC42, CFL1, CYFIP1, FGR, GRB2, HCK, HSP90AB1, LYN, NCK1, SYK, WASF2, WIPF1]
R-HSA:2029482	Regulation of actin dynamics for phagocytic cup formation	REACTOME_Pathways_18.08.2022	1.04364e-13	7.03415e-11	8.23881e-11	2.14209e-09	[-1]	Group38	24.5902	15	[ABI1, ACTB, ARPC1B, ARPC4, ARPC5, BTK, CDC42, CFL1, CYFIP1, GRB2, HSP90AB1, NCK1, SYK, WASF2, WIPF1]
R-HSA:3928662	EPHB-mediated forward signaling	REACTOME_Pathways_18.08.2022	5.54654e-07	0.000337229	8.23881e-11	2.14209e-09	[-1]	Group38	19.0476	8	[ACTB, ARPC1B, ARPC4, ARPC5, CDC42, CFL1, LYN, TIAM1]
R-HSA:422475	Axon guidance	REACTOME_Pathways_18.08.2022	1.41587e-07	8.83502e-05	8.23881e-11	2.14209e-09	[-1]	Group38	5.25362	29	[ACTB, ANK2, ARPC1B, ARPC4, ARPC5, CDC42, CFL1, CHL1, DOK2, FES, GAB1, GRB2, HSP90AB1, LYN, MSI1, NCAM1, NCK1, PIK3CD, PIK3R3, PLXNA3, PLXNB1, PLXNC1, PTPRC, SEMA4A, SEMA7A, SH3KBP1, SRGAP2, TIAM1, UBB]
R-HSA:5663213	RHO GTPases Activate WASPs and WAVEs	REACTOME_Pathways_18.08.2022	5.58127e-13	3.72829e-10	8.23881e-11	2.14209e-09	[-1]	Group38	33.3333	12	[ABI1, ACTB, ARPC1B, ARPC4, ARPC5, BTK, CDC42, CYFIP1, GRB2, NCK1, WASF2, WIPF1]
R-HSA:9664407	Parasite infection	REACTOME_Pathways_18.08.2022	2.83031e-15	1.92178e-12	8.23881e-11	2.14209e-09	[-1]	Group38	27.1186	16	[ABI1, ACTB, ARPC1B, ARPC4, ARPC5, BTK, CDC42, CYFIP1, FGR, GRB2, HCK, LYN, NCK1, SYK, WASF2, WIPF1]
R-HSA:9664417	Leishmania phagocytosis	REACTOME_Pathways_18.08.2022	2.83031e-15	1.92178e-12	8.23881e-11	2.14209e-09	[-1]	Group38	27.1186	16	[ABI1, ACTB, ARPC1B, ARPC4, ARPC5, BTK, CDC42, CYFIP1, FGR, GRB2, HCK, LYN, NCK1, SYK, WASF2, WIPF1]
R-HSA:9664422	FCGR3A-mediated phagocytosis	REACTOME_Pathways_18.08.2022	2.83031e-15	1.92178e-12	8.23881e-11	2.14209e-09	[-1]	Group38	27.1186	16	[ABI1, ACTB, ARPC1B, ARPC4, ARPC5, BTK, CDC42, CYFIP1, FGR, GRB2, HCK, LYN, NCK1, SYK, WASF2, WIPF1]
R-HSA:9675108	Nervous system development	REACTOME_Pathways_18.08.2022	3.56864e-07	0.000219472	8.23881e-11	2.14209e-09	[-1]	Group38	5.026	29	[ACTB, ANK2, ARPC1B, ARPC4, ARPC5, CDC42, CFL1, CHL1, DOK2, FES, GAB1, GRB2, HSP90AB1, LYN, MSI1, NCAM1, NCK1, PIK3CD, PIK3R3, PLXNA3, PLXNB1, PLXNC1, PTPRC, SEMA4A, SEMA7A, SH3KBP1, SRGAP2, TIAM1, UBB]
GO:0001816	cytokine production	GO_BiologicalProcess-EBI-UniProt-GOA-ACAP-ARAP_05.04.2022_00h00	4.30089e-07	0.000262785	1.62446e-07	1.62446e-06	[2, 5]	Group39	4.43038	35	[AFAP1L2, ATF4, ATP2B1, BCL6, BTK, CADM1, CCL19, CD74, CMKLR1, CYBA, CYRIB, ERBIN, FCER1G, FGR, HLA-A, HSP90AB1, HSPA1A, HSPB1, IL12B, IL21, IRAK3, IRF8, LCP1, LYN, NAV3, PIK3CD, PTPN6, PTPRC, PTPRJ, SEMA7A, SOCS1, SYK, TLR6, TLR8, TNFRSF21]
GO:0002764	immune response-regulating signaling pathway	GO_BiologicalProcess-EBI-UniProt-GOA-ACAP-ARAP_05.04.2022_00h00	6.38583e-09	4.11886e-06	1.62446e-07	1.62446e-06	[3, 4, 5]	Group39	5.75139	31	[BLNK, BTK, CBLB, CMKLR1, CTSS, CYBA, DAB2IP, ERBIN, FCER1G, FGR, FYB1, HCK, HLA-A, HSPA1A, IRAK3, LYN, NCOR2, PIK3AP1, PIK3CD, PRKCB, PTPN6, PTPRC, PTPRJ, SLC15A4, SYK, TIFA, TLR6, TLR8, TNFRSF21, TNIP3, UNC93B1]
GO:0050778	positive regulation of immune response	GO_BiologicalProcess-EBI-UniProt-GOA-ACAP-ARAP_05.04.2022_00h00	3.93765e-05	0.0193732	1.62446e-07	1.62446e-06	[3, 4, 5]	Group39	4.14747	27	[BLNK, BTK, CADM1, CBLB, CCL19, CD74, CMKLR1, CYRIB, FCER1G, FGR, FYB1, HCK, HLA-A, IL12B, IL21, LYN, NCOR2, PIK3CD, PRKCB, PTPN6, PTPRC, PTPRJ, SLC15A4, SPI1, SYK, TLR8, TNFRSF21]
GO:0001817	regulation of cytokine production	GO_BiologicalProcess-EBI-UniProt-GOA-ACAP-ARAP_05.04.2022_00h00	3.59687e-07	0.000220488	1.62446e-07	1.62446e-06	[3, 4, 5, 6]	Group39	4.46429	35	[AFAP1L2, ATF4, ATP2B1, BCL6, BTK, CADM1, CCL19, CD74, CMKLR1, CYBA, CYRIB, ERBIN, FCER1G, FGR, HLA-A, HSP90AB1, HSPA1A, HSPB1, IL12B, IL21, IRAK3, IRF8, LCP1, LYN, NAV3, PIK3CD, PTPN6, PTPRC, PTPRJ, SEMA7A, SOCS1, SYK, TLR6, TLR8, TNFRSF21]
GO:0002221	pattern recognition receptor signaling pathway	GO_BiologicalProcess-EBI-UniProt-GOA-ACAP-ARAP_05.04.2022_00h00	1.5665e-06	0.000907005	1.62446e-07	1.62446e-06	[4, 5, 6]	Group39	7.77202	15	[BTK, CTSS, CYBA, DAB2IP, ERBIN, HSPA1A, IRAK3, LYN, PIK3AP1, SLC15A4, TIFA, TLR6, TLR8, TNIP3, UNC93B1]
GO:0002757	immune response-activating signal transduction	GO_BiologicalProcess-EBI-UniProt-GOA-ACAP-ARAP_05.04.2022_00h00	3.19715e-05	0.0158579	1.62446e-07	1.62446e-06	[3, 4, 5, 6, 7]	Group39	5.29412	18	[BLNK, BTK, CBLB, CMKLR1, FCER1G, FGR, FYB1, HCK, HLA-A, LYN, NCOR2, PIK3CD, PRKCB, PTPN6, PTPRC, PTPRJ, SYK, TNFRSF21]
GO:0002768	immune response-regulating cell surface receptor signaling pathway	GO_BiologicalProcess-EBI-UniProt-GOA-ACAP-ARAP_05.04.2022_00h00	9.82747e-05	0.0450098	1.62446e-07	1.62446e-06	[4, 5, 6]	Group39	4.85175	18	[BLNK, BTK, CBLB, CMKLR1, FCER1G, FGR, FYB1, HCK, HLA-A, LYN, NCOR2, PIK3CD, PRKCB, PTPN6, PTPRC, PTPRJ, SYK, TNFRSF21]
GO:0002224	toll-like receptor signaling pathway	GO_BiologicalProcess-EBI-UniProt-GOA-ACAP-ARAP_05.04.2022_00h00	2.52402e-06	0.00144121	1.62446e-07	1.62446e-06	[5, 6, 7]	Group39	9.375	12	[BTK, CTSS, CYBA, DAB2IP, IRAK3, LYN, PIK3AP1, SLC15A4, TLR6, TLR8, TNIP3, UNC93B1]
GO:0002429	immune response-activating cell surface receptor signaling pathway	GO_BiologicalProcess-EBI-UniProt-GOA-ACAP-ARAP_05.04.2022_00h00	3.19715e-05	0.0158579	1.62446e-07	1.62446e-06	[4, 5, 6, 7, 8]	Group39	5.29412	18	[BLNK, BTK, CBLB, CMKLR1, FCER1G, FGR, FYB1, HCK, HLA-A, LYN, NCOR2, PIK3CD, PRKCB, PTPN6, PTPRC, PTPRJ, SYK, TNFRSF21]
R-HSA:373755	Semaphorin interactions	REACTOME_Pathways_18.08.2022	1.81628e-06	0.00104981	2.60176e-11	7.28493e-10	[-1]	Group40	13.8462	9	[CFL1, FES, HSP90AB1, PLXNA3, PLXNB1, PLXNC1, PTPRC, SEMA4A, SEMA7A]
R-HSA:422475	Axon guidance	REACTOME_Pathways_18.08.2022	1.41587e-07	8.83502e-05	2.60176e-11	7.28493e-10	[-1]	Group40	5.25362	29	[ACTB, ANK2, ARPC1B, ARPC4, ARPC5, CDC42, CFL1, CHL1, DOK2, FES, GAB1, GRB2, HSP90AB1, LYN, MSI1, NCAM1, NCK1, PIK3CD, PIK3R3, PLXNA3, PLXNB1, PLXNC1, PTPRC, SEMA4A, SEMA7A, SH3KBP1, SRGAP2, TIAM1, UBB]
R-HSA:9675108	Nervous system development	REACTOME_Pathways_18.08.2022	3.56864e-07	0.000219472	2.60176e-11	7.28493e-10	[-1]	Group40	5.026	29	[ACTB, ANK2, ARPC1B, ARPC4, ARPC5, CDC42, CFL1, CHL1, DOK2, FES, GAB1, GRB2, HSP90AB1, LYN, MSI1, NCAM1, NCK1, PIK3CD, PIK3R3, PLXNA3, PLXNB1, PLXNC1, PTPRC, SEMA4A, SEMA7A, SH3KBP1, SRGAP2, TIAM1, UBB]
GO:0022604	regulation of cell morphogenesis	GO_BiologicalProcess-EBI-UniProt-GOA-ACAP-ARAP_05.04.2022_00h00	1.90818e-05	0.00978896	2.60176e-11	7.28493e-10	[4, 5]	Group40	5.50459	18	[CDC42, CFL1, CYFIP1, DBNL, FES, FGD4, FGR, FMNL1, HCK, PLXNA3, PLXNB1, PLXNC1, RAC2, RHOG, SEMA4A, SH3KBP1, SLC9A3R1, TPM1]
GO:0031346	positive regulation of cell projection organization	GO_BiologicalProcess-EBI-UniProt-GOA-ACAP-ARAP_05.04.2022_00h00	1.50736e-07	9.39086e-05	2.60176e-11	7.28493e-10	[4, 5, 6]	Group40	6.23306	23	[CAMK1, CCL19, CDC42, CYFIP1, DAB2IP, DBNL, FES, FNBP1L, GRN, LYN, NCK1, PLXNA3, PLXNB1, PLXNC1, RAB8B, RAC2, RAPGEF2, RGS2, SEMA7A, SETX, SKIL, TIAM1, WASF2]
GO:0071526	semaphorin-plexin signaling pathway	GO_BiologicalProcess-EBI-UniProt-GOA-ACAP-ARAP_05.04.2022_00h00	1.36984e-06	0.000797249	2.60176e-11	7.28493e-10	[4, 5, 6]	Group40	17.0213	8	[ARHGDIA, NCAM1, PLXNA3, PLXNB1, PLXNC1, SEMA4A, SEMA6C, SEMA7A]
GO:0048667	cell morphogenesis involved in neuron differentiation	GO_BiologicalProcess-EBI-UniProt-GOA-ACAP-ARAP_05.04.2022_00h00	8.49228e-07	0.000508688	2.60176e-11	7.28493e-10	[5, 6, 8, 9, 10]	Group40	4.81728	29	[ABI1, ACTB, ARHGAP4, BSG, CDC42, CFL1, CHL1, CTNND2, CYFIP1, DBNL, DOCK10, HSP90AB1, MYCBP2, NCAM1, PLXNA3, PLXNB1, PLXNC1, RAC2, RAPGEF2, RHOG, SEMA4A, SEMA6C, SEMA7A, SKIL, SLC9A3R1, SMOX, SULT4A1, TANC2, TIAM1]
GO:0010975	regulation of neuron projection development	GO_BiologicalProcess-EBI-UniProt-GOA-ACAP-ARAP_05.04.2022_00h00	7.85023e-06	0.00422342	2.60176e-11	7.28493e-10	[6, 7, 9, 10, 11]	Group40	4.94624	23	[ARHGAP4, CAMK1, CFL1, CYFIP1, DAB2IP, DBNL, FES, GRN, LYN, MYLIP, NCK1, PLXNA3, PLXNB1, PLXNC1, RAPGEF2, RGS2, SEMA4A, SEMA6C, SEMA7A, SETX, SKIL, TANC2, TIAM1]
GO:0061564	axon development	GO_BiologicalProcess-EBI-UniProt-GOA-ACAP-ARAP_05.04.2022_00h00	5.14924e-05	0.0249738	2.60176e-11	7.28493e-10	[6, 7, 9, 10, 11]	Group40	4.38931	23	[ACTB, ARHGAP4, BSG, CHL1, CYFIP1, DBNL, GRN, HSP90AB1, JUN, MYCBP2, NCAM1, PLXNA3, PLXNB1, PLXNC1, RAC2, RHOG, SEMA4A, SEMA6C, SEMA7A, SKIL, SMOX, TIAM1, TNFRSF21]
GO:0050772	positive regulation of axonogenesis	GO_BiologicalProcess-EBI-UniProt-GOA-ACAP-ARAP_05.04.2022_00h00	8.38259e-05	0.038979	2.60176e-11	7.28493e-10	[5, 6, 7, 8, 9, 10, 11, 12, 13, 14]	Group40	9.87654	8	[CYFIP1, DBNL, PLXNA3, PLXNB1, PLXNC1, SEMA7A, SKIL, TIAM1]
GO:0044089	positive regulation of cellular component biogenesis	GO_BiologicalProcess-EBI-UniProt-GOA-ACAP-ARAP_05.04.2022_00h00	6.50822e-06	0.00356	7.12028e-09	1.42406e-07	[3, 4, 5]	Group41	4.74383	25	[ARHGEF15, BIK, BIN1, CCL19, CDC42, CNOT6, CYFIP1, DAB2IP, FES, FNBP1L, GRB2, HCK, HSPA1A, LCP1, NAV3, NCK1, PLEK, PTPRJ, RAC2, RAP1B, SEMA4A, SYK, TLR6, TPM1, WASF2]
GO:0051130	positive regulation of cellular component organization	GO_BiologicalProcess-EBI-UniProt-GOA-ACAP-ARAP_05.04.2022_00h00	3.01608e-08	1.91521e-05	7.12028e-09	1.42406e-07	[3, 4, 5]	Group41	4.19708	46	[ADRB2, ARHGEF15, BIK, BIN1, CAMK1, CCL19, CD53, CDC42, CNOT6, CXCL9, CYFIP1, DAB2IP, DBNL, FES, FNBP1L, GPX1, GRB2, GRN, HCK, HCLS1, HSPA1A, IQSEC1, LCP1, LYN, NAV3, NCK1, PLEK, PLXNA3, PLXNB1, PLXNC1, PPP1R15A, PTPRJ, RAB8B, RAC2, RAP1B, RAPGEF2, RGS2, SEMA4A, SEMA7A, SETX, SKIL, SYK, TIAM1, TLR6, TPM1, WASF2]
GO:0031344	regulation of cell projection organization	GO_BiologicalProcess-EBI-UniProt-GOA-ACAP-ARAP_05.04.2022_00h00	1.37774e-06	0.00080047	7.12028e-09	1.42406e-07	[4, 5]	Group41	4.43213	32	[ARHGAP4, CAMK1, CCL19, CDC42, CFL1, CYFIP1, DAB2IP, DBNL, FES, FNBP1L, GRN, LYN, MYLIP, NCK1, PLXNA3, PLXNB1, PLXNC1, RAB5A, RAB8B, RAC2, RAPGEF2, RGS2, RHOG, SEMA4A, SEMA6C, SEMA7A, SETX, SKIL, TANC2, TBC1D10B, TIAM1, WASF2]
GO:0031346	positive regulation of cell projection organization	GO_BiologicalProcess-EBI-UniProt-GOA-ACAP-ARAP_05.04.2022_00h00	1.50736e-07	9.39086e-05	7.12028e-09	1.42406e-07	[4, 5, 6]	Group41	6.23306	23	[CAMK1, CCL19, CDC42, CYFIP1, DAB2IP, DBNL, FES, FNBP1L, GRN, LYN, NCK1, PLXNA3, PLXNB1, PLXNC1, RAB8B, RAC2, RAPGEF2, RGS2, SEMA7A, SETX, SKIL, TIAM1, WASF2]
GO:0043254	regulation of protein-containing complex assembly	GO_BiologicalProcess-EBI-UniProt-GOA-ACAP-ARAP_05.04.2022_00h00	7.74537e-07	0.000467046	7.12028e-09	1.42406e-07	[4, 5, 6]	Group41	5.50459	24	[ARPC1B, ARPC4, ARPC5, BIK, BIN1, CAPZA1, CDC42, CYFIP1, CYRIB, DAB2IP, DBNL, FES, GRB2, HCK, HCLS1, HSPA1A, LCP1, NAV3, NCK1, PLEK, RAP1B, SSH3, SYK, TLR6]
GO:1902905	positive regulation of supramolecular fiber organization	GO_BiologicalProcess-EBI-UniProt-GOA-ACAP-ARAP_05.04.2022_00h00	3.94596e-06	0.00220579	7.12028e-09	1.42406e-07	[4, 5, 6]	Group41	7.69231	14	[ARHGEF15, BIN1, CDC42, CYFIP1, FES, GPX1, GRB2, HCK, HSPA1A, NAV3, NCK1, PLEK, TPM1, WASF2]
GO:0031334	positive regulation of protein-containing complex assembly	GO_BiologicalProcess-EBI-UniProt-GOA-ACAP-ARAP_05.04.2022_00h00	1.72491e-05	0.00893503	7.12028e-09	1.42406e-07	[4, 5, 6, 7]	Group41	6.76329	14	[BIK, BIN1, DAB2IP, FES, GRB2, HCK, HSPA1A, LCP1, NAV3, NCK1, PLEK, RAP1B, SYK, TLR6]
GO:0120035	regulation of plasma membrane bounded cell projection organization	GO_BiologicalProcess-EBI-UniProt-GOA-ACAP-ARAP_05.04.2022_00h00	2.25816e-06	0.00129393	7.12028e-09	1.42406e-07	[5, 6]	Group41	4.40967	31	[ARHGAP4, CAMK1, CCL19, CDC42, CFL1, CYFIP1, DAB2IP, DBNL, FES, FNBP1L, GRN, LYN, MYLIP, NCK1, PLXNA3, PLXNB1, PLXNC1, RAB5A, RAC2, RAPGEF2, RGS2, RHOG, SEMA4A, SEMA6C, SEMA7A, SETX, SKIL, TANC2, TBC1D10B, TIAM1, WASF2]
GO:0051495	positive regulation of cytoskeleton organization	GO_BiologicalProcess-EBI-UniProt-GOA-ACAP-ARAP_05.04.2022_00h00	2.76507e-06	0.00156779	7.12028e-09	1.42406e-07	[5, 6, 7]	Group41	7.42574	15	[ARHGEF15, BIN1, CDC42, CYFIP1, FES, GRB2, HCK, HCLS1, HSPA1A, NAV3, NCK1, PLEK, PLXNA3, TPM1, WASF2]
GO:0010975	regulation of neuron projection development	GO_BiologicalProcess-EBI-UniProt-GOA-ACAP-ARAP_05.04.2022_00h00	7.85023e-06	0.00422342	7.12028e-09	1.42406e-07	[6, 7, 9, 10, 11]	Group41	4.94624	23	[ARHGAP4, CAMK1, CFL1, CYFIP1, DAB2IP, DBNL, FES, GRN, LYN, MYLIP, NCK1, PLXNA3, PLXNB1, PLXNC1, RAPGEF2, RGS2, SEMA4A, SEMA6C, SEMA7A, SETX, SKIL, TANC2, TIAM1]
GO:0002699	positive regulation of immune effector process	GO_BiologicalProcess-EBI-UniProt-GOA-ACAP-ARAP_05.04.2022_00h00	2.81206e-07	0.000173504	2.71881e-07	2.44693e-06	[3, 4, 5]	Group42	7.0632	19	[BTK, CADM1, CCL19, CD74, CYRIB, FES, FGR, HLA-A, IL12B, IL21, LYN, MYO18A, PTPN6, PTPRC, PTPRJ, RAC2, SEMA7A, SPI1, SYK]
GO:0031343	positive regulation of cell killing	GO_BiologicalProcess-EBI-UniProt-GOA-ACAP-ARAP_05.04.2022_00h00	1.87694e-05	0.00966623	2.71881e-07	2.44693e-06	[3, 4, 5]	Group42	12.1212	8	[CADM1, CYRIB, HLA-A, IL12B, IL21, PTPRC, SPI1, SYK]
GO:0032103	positive regulation of response to external stimulus	GO_BiologicalProcess-EBI-UniProt-GOA-ACAP-ARAP_05.04.2022_00h00	3.60633e-05	0.0178513	2.71881e-07	2.44693e-06	[3, 4, 5]	Group42	4.61216	22	[BTK, CADM1, CCL19, CD74, CMKLR1, CNOT6, CYBA, GRN, HCK, HSPB1, IL12B, IL21, LCP1, LYN, RAC2, S1PR1, SASH1, SLC15A4, SPI1, SYK, TLR8, TNFRSF1A]
GO:0050777	negative regulation of immune response	GO_BiologicalProcess-EBI-UniProt-GOA-ACAP-ARAP_05.04.2022_00h00	1.82622e-05	0.00944155	2.71881e-07	2.44693e-06	[3, 4, 5]	Group42	7.18232	13	[BCL6, FGR, GPX1, GRN, HCK, HLA-A, IL12B, IRAK3, LYN, PTPN6, PTPRC, SPI1, SYK]
GO:0050778	positive regulation of immune response	GO_BiologicalProcess-EBI-UniProt-GOA-ACAP-ARAP_05.04.2022_00h00	3.93765e-05	0.0193732	2.71881e-07	2.44693e-06	[3, 4, 5]	Group42	4.14747	27	[BLNK, BTK, CADM1, CBLB, CCL19, CD74, CMKLR1, CYRIB, FCER1G, FGR, FYB1, HCK, HLA-A, IL12B, IL21, LYN, NCOR2, PIK3CD, PRKCB, PTPN6, PTPRC, PTPRJ, SLC15A4, SPI1, SYK, TLR8, TNFRSF21]
GO:0002275	myeloid cell activation involved in immune response	GO_BiologicalProcess-EBI-UniProt-GOA-ACAP-ARAP_05.04.2022_00h00	2.68674e-06	0.00152875	2.71881e-07	2.44693e-06	[4, 5]	Group42	10.2804	11	[BTK, FCER1G, FES, FGR, GRN, LYN, PIK3CD, PTPN6, RAC2, SPI1, SYK]
GO:0002703	regulation of leukocyte mediated immunity	GO_BiologicalProcess-EBI-UniProt-GOA-ACAP-ARAP_05.04.2022_00h00	6.77953e-06	0.00369485	2.71881e-07	2.44693e-06	[4, 5]	Group42	6.53061	16	[BCL6, BTK, CADM1, CYRIB, FES, FGR, HLA-A, IL12B, IL21, LYN, PTPN6, PTPRC, RAC2, SLC15A4, SPI1, SYK]
GO:0001912	positive regulation of leukocyte mediated cytotoxicity	GO_BiologicalProcess-EBI-UniProt-GOA-ACAP-ARAP_05.04.2022_00h00	6.46649e-05	0.0307158	2.71881e-07	2.44693e-06	[4, 5, 6, 7]	Group42	12.069	7	[CADM1, CYRIB, HLA-A, IL12B, IL21, PTPRC, SPI1]
GO:0002861	regulation of inflammatory response to antigenic stimulus	GO_BiologicalProcess-EBI-UniProt-GOA-ACAP-ARAP_05.04.2022_00h00	8.66818e-06	0.00464614	2.71881e-07	2.44693e-06	[4, 5, 6, 7]	Group42	16.2791	7	[BTK, FGR, GPX1, HCK, IL12B, LYN, SYK]
GO:0045088	regulation of innate immune response	GO_BiologicalProcess-EBI-UniProt-GOA-ACAP-ARAP_05.04.2022_00h00	6.43691e-06	0.00352742	2.71881e-07	2.44693e-06	[4, 5, 6, 7]	Group42	6.55738	16	[CADM1, FGR, GRN, HCK, HLA-A, IL12B, IL21, IRAK3, LYN, NCF1, PTPN6, SLC15A4, SOCS1, SPI1, SYK, TLR8]
GO:0002862	negative regulation of inflammatory response to antigenic stimulus	GO_BiologicalProcess-EBI-UniProt-GOA-ACAP-ARAP_05.04.2022_00h00	5.85263e-06	0.00321895	2.71881e-07	2.44693e-06	[4, 5, 6, 7, 8]	Group42	22.2222	6	[FGR, GPX1, HCK, IL12B, LYN, SYK]
GO:0046834	lipid phosphorylation	GO_BiologicalProcess-EBI-UniProt-GOA-ACAP-ARAP_05.04.2022_00h00	1.72391e-05	0.00894709	2.0137e-08	3.82603e-07	[5, 6]	Group43	10.5882	9	[CCL19, CDC42, DAB2IP, FGR, FLT3, LYN, PIK3R3, SOCS1, SOCS3]
GO:0001727	lipid kinase activity	GO_BiologicalProcess-EBI-UniProt-GOA-ACAP-ARAP_05.04.2022_00h00	6.84276e-06	0.00371562	2.0137e-08	3.82603e-07	[6, 7]	Group43	11.8421	9	[CCL19, CDC42, DAB2IP, FGR, FLT3, LYN, PIK3R3, SOCS1, SOCS3]
GO:0018212	peptidyl-tyrosine modification	GO_BiologicalProcess-EBI-UniProt-GOA-ACAP-ARAP_05.04.2022_00h00	1.24413e-07	7.7758e-05	2.0137e-08	3.82603e-07	[7, 8]	Group43	5.89623	25	[ABI1, AFAP1L2, BTK, CADM4, CBLB, CD74, CRIM1, FES, FGR, FLT3, HCK, HCLS1, HIPK3, IL12B, IL21, IL31RA, LYN, NCF1, PTPN6, PTPRC, PTPRJ, SOCS1, SOCS3, SYK, TNFRSF1A]
GO:0043550	regulation of lipid kinase activity	GO_BiologicalProcess-EBI-UniProt-GOA-ACAP-ARAP_05.04.2022_00h00	3.86079e-06	0.00216204	2.0137e-08	3.82603e-07	[6, 7, 8, 9]	Group43	12.6761	9	[CCL19, CDC42, DAB2IP, FGR, FLT3, LYN, PIK3R3, SOCS1, SOCS3]
GO:0007260	tyrosine phosphorylation of STAT protein	GO_BiologicalProcess-EBI-UniProt-GOA-ACAP-ARAP_05.04.2022_00h00	1.89628e-05	0.00974689	2.0137e-08	3.82603e-07	[6, 7, 8, 9, 10]	Group43	10.4651	9	[FLT3, HCLS1, IL12B, IL21, IL31RA, LYN, SOCS1, SOCS3, TNFRSF1A]
GO:0018108	peptidyl-tyrosine phosphorylation	GO_BiologicalProcess-EBI-UniProt-GOA-ACAP-ARAP_05.04.2022_00h00	1.08644e-07	6.81201e-05	2.0137e-08	3.82603e-07	[7, 8, 9]	Group43	5.93824	25	[ABI1, AFAP1L2, BTK, CADM4, CBLB, CD74, CRIM1, FES, FGR, FLT3, HCK, HCLS1, HIPK3, IL12B, IL21, IL31RA, LYN, NCF1, PTPN6, PTPRC, PTPRJ, SOCS1, SOCS3, SYK, TNFRSF1A]
GO:0046854	phosphatidylinositol phosphate biosynthetic process	GO_BiologicalProcess-EBI-UniProt-GOA-ACAP-ARAP_05.04.2022_00h00	3.11521e-05	0.0154826	2.0137e-08	3.82603e-07	[7, 8, 9]	Group43	8.77193	10	[CCL19, CDC42, DAB2IP, FGR, FLT3, LYN, PIK3CD, PIK3R3, SOCS1, SOCS3]
GO:0050730	regulation of peptidyl-tyrosine phosphorylation	GO_BiologicalProcess-EBI-UniProt-GOA-ACAP-ARAP_05.04.2022_00h00	4.9228e-07	0.000300291	2.0137e-08	3.82603e-07	[7, 8, 9, 10]	Group43	6.81004	19	[ABI1, AFAP1L2, CADM4, CBLB, CD74, FLT3, HCLS1, IL12B, IL21, IL31RA, LYN, NCF1, PTPN6, PTPRC, PTPRJ, SOCS1, SOCS3, SYK, TNFRSF1A]
GO:0035004	phosphatidylinositol 3-kinase activity	GO_BiologicalProcess-EBI-UniProt-GOA-ACAP-ARAP_05.04.2022_00h00	3.57158e-07	0.000219295	2.0137e-08	3.82603e-07	[8, 9, 10]	Group43	14.2857	10	[CCL19, CDC42, DAB2IP, FGR, FLT3, LYN, PIK3CD, PIK3R3, SOCS1, SOCS3]
GO:0042509	regulation of tyrosine phosphorylation of STAT protein	GO_BiologicalProcess-EBI-UniProt-GOA-ACAP-ARAP_05.04.2022_00h00	1.28443e-05	0.00675608	2.0137e-08	3.82603e-07	[7, 8, 9, 10, 11]	Group43	10.9756	9	[FLT3, HCLS1, IL12B, IL21, IL31RA, LYN, SOCS1, SOCS3, TNFRSF1A]
GO:0043551	regulation of phosphatidylinositol 3-kinase activity	GO_BiologicalProcess-EBI-UniProt-GOA-ACAP-ARAP_05.04.2022_00h00	7.82558e-07	0.0004711	2.0137e-08	3.82603e-07	[7, 8, 9, 10, 11]	Group43	15.2542	9	[CCL19, CDC42, DAB2IP, FGR, FLT3, LYN, PIK3R3, SOCS1, SOCS3]
GO:0050731	positive regulation of peptidyl-tyrosine phosphorylation	GO_BiologicalProcess-EBI-UniProt-GOA-ACAP-ARAP_05.04.2022_00h00	1.92128e-05	0.00983695	2.0137e-08	3.82603e-07	[7, 8, 9, 10, 11]	Group43	6.69856	14	[ABI1, AFAP1L2, CD74, FLT3, HCLS1, IL12B, IL21, IL31RA, LYN, NCF1, PTPRC, PTPRJ, SYK, TNFRSF1A]
GO:0002699	positive regulation of immune effector process	GO_BiologicalProcess-EBI-UniProt-GOA-ACAP-ARAP_05.04.2022_00h00	2.81206e-07	0.000173504	2.52381e-08	4.0381e-07	[3, 4, 5]	Group44	7.0632	19	[BTK, CADM1, CCL19, CD74, CYRIB, FES, FGR, HLA-A, IL12B, IL21, LYN, MYO18A, PTPN6, PTPRC, PTPRJ, RAC2, SEMA7A, SPI1, SYK]
GO:0031343	positive regulation of cell killing	GO_BiologicalProcess-EBI-UniProt-GOA-ACAP-ARAP_05.04.2022_00h00	1.87694e-05	0.00966623	2.52381e-08	4.0381e-07	[3, 4, 5]	Group44	12.1212	8	[CADM1, CYRIB, HLA-A, IL12B, IL21, PTPRC, SPI1, SYK]
GO:0050777	negative regulation of immune response	GO_BiologicalProcess-EBI-UniProt-GOA-ACAP-ARAP_05.04.2022_00h00	1.82622e-05	0.00944155	2.52381e-08	4.0381e-07	[3, 4, 5]	Group44	7.18232	13	[BCL6, FGR, GPX1, GRN, HCK, HLA-A, IL12B, IRAK3, LYN, PTPN6, PTPRC, SPI1, SYK]
GO:0050778	positive regulation of immune response	GO_BiologicalProcess-EBI-UniProt-GOA-ACAP-ARAP_05.04.2022_00h00	3.93765e-05	0.0193732	2.52381e-08	4.0381e-07	[3, 4, 5]	Group44	4.14747	27	[BLNK, BTK, CADM1, CBLB, CCL19, CD74, CMKLR1, CYRIB, FCER1G, FGR, FYB1, HCK, HLA-A, IL12B, IL21, LYN, NCOR2, PIK3CD, PRKCB, PTPN6, PTPRC, PTPRJ, SLC15A4, SPI1, SYK, TLR8, TNFRSF21]
GO:0002703	regulation of leukocyte mediated immunity	GO_BiologicalProcess-EBI-UniProt-GOA-ACAP-ARAP_05.04.2022_00h00	6.77953e-06	0.00369485	2.52381e-08	4.0381e-07	[4, 5]	Group44	6.53061	16	[BCL6, BTK, CADM1, CYRIB, FES, FGR, HLA-A, IL12B, IL21, LYN, PTPN6, PTPRC, RAC2, SLC15A4, SPI1, SYK]
GO:0046651	lymphocyte proliferation	GO_BiologicalProcess-EBI-UniProt-GOA-ACAP-ARAP_05.04.2022_00h00	1.15395e-05	0.00610442	2.52381e-08	4.0381e-07	[4, 5]	Group44	5.71429	18	[BCL6, BTK, CADM1, CBLB, CCL19, CD209, CD74, FLT3, HLA-A, IL12B, IL21, LYN, NCK1, PTPN6, PTPRC, RAC2, SYK, TNFRSF21]
GO:0001819	positive regulation of cytokine production	GO_BiologicalProcess-EBI-UniProt-GOA-ACAP-ARAP_05.04.2022_00h00	1.21868e-05	0.00642247	2.52381e-08	4.0381e-07	[3, 4, 5, 6, 7]	Group44	4.6875	24	[AFAP1L2, ATF4, CADM1, CCL19, CD74, CYBA, CYRIB, FCER1G, FGR, HLA-A, HSPA1A, HSPB1, IL12B, IL21, IRAK3, IRF8, LCP1, PIK3CD, PTPRC, PTPRJ, SEMA7A, SYK, TLR6, TLR8]
GO:0022409	positive regulation of cell-cell adhesion	GO_BiologicalProcess-EBI-UniProt-GOA-ACAP-ARAP_05.04.2022_00h00	1.83169e-05	0.00945152	2.52381e-08	4.0381e-07	[4, 5, 6]	Group44	5.52147	18	[ACTB, BCL6, CCL19, CD209, CD74, CYRIB, HLA-A, HLA-DOB, HSPH1, IL12B, IL21, LYN, NCK1, PLPP3, PTPN6, PTPRC, SOCS1, SYK]
GO:0001912	positive regulation of leukocyte mediated cytotoxicity	GO_BiologicalProcess-EBI-UniProt-GOA-ACAP-ARAP_05.04.2022_00h00	6.46649e-05	0.0307158	2.52381e-08	4.0381e-07	[4, 5, 6, 7]	Group44	12.069	7	[CADM1, CYRIB, HLA-A, IL12B, IL21, PTPRC, SPI1]
GO:0045088	regulation of innate immune response	GO_BiologicalProcess-EBI-UniProt-GOA-ACAP-ARAP_05.04.2022_00h00	6.43691e-06	0.00352742	2.52381e-08	4.0381e-07	[4, 5, 6, 7]	Group44	6.55738	16	[CADM1, FGR, GRN, HCK, HLA-A, IL12B, IL21, IRAK3, LYN, NCF1, PTPN6, SLC15A4, SOCS1, SPI1, SYK, TLR8]
GO:0046631	alpha-beta T cell activation	GO_BiologicalProcess-EBI-UniProt-GOA-ACAP-ARAP_05.04.2022_00h00	1.19748e-05	0.00632267	2.52381e-08	4.0381e-07	[5, 6]	Group44	7.47126	13	[BCL6, CBLB, CCL19, HLA-A, HSPH1, IL12B, IL21, JUNB, NCOR2, PTPRC, SEMA4A, SOCS1, SYK]
GO:1903037	regulation of leukocyte cell-cell adhesion	GO_BiologicalProcess-EBI-UniProt-GOA-ACAP-ARAP_05.04.2022_00h00	2.93734e-05	0.0146573	2.52381e-08	4.0381e-07	[5, 6]	Group44	5.13514	19	[ACTB, BCL6, CBLB, CCL19, CD209, CD74, CYRIB, HLA-A, HLA-DOB, HSPH1, IL12B, IL21, LYN, NCK1, PTPN6, PTPRC, SOCS1, SYK, TNFRSF21]
GO:1903039	positive regulation of leukocyte cell-cell adhesion	GO_BiologicalProcess-EBI-UniProt-GOA-ACAP-ARAP_05.04.2022_00h00	7.62177e-06	0.00410813	2.52381e-08	4.0381e-07	[5, 6, 7]	Group44	6.15942	17	[ACTB, BCL6, CCL19, CD209, CD74, CYRIB, HLA-A, HLA-DOB, HSPH1, IL12B, IL21, LYN, NCK1, PTPN6, PTPRC, SOCS1, SYK]
GO:0050870	positive regulation of T cell activation	GO_BiologicalProcess-EBI-UniProt-GOA-ACAP-ARAP_05.04.2022_00h00	2.50872e-06	0.00143499	2.52381e-08	4.0381e-07	[5, 6, 7, 8]	Group44	6.69291	17	[ACTB, BCL6, CCL19, CD209, CD74, CYRIB, HLA-A, HLA-DOB, HSPH1, IL12B, IL21, LYN, NCK1, PTPN6, PTPRC, SOCS1, SYK]
GO:0042129	regulation of T cell proliferation	GO_BiologicalProcess-EBI-UniProt-GOA-ACAP-ARAP_05.04.2022_00h00	0.000107881	0.048978	2.52381e-08	4.0381e-07	[6, 7, 8]	Group44	6.45161	12	[CBLB, CCL19, CD209, HLA-A, IL12B, IL21, NCK1, PTPN6, PTPRC, RAC2, SYK, TNFRSF21]
GO:0046634	regulation of alpha-beta T cell activation	GO_BiologicalProcess-EBI-UniProt-GOA-ACAP-ARAP_05.04.2022_00h00	2.28246e-05	0.0116406	2.52381e-08	4.0381e-07	[6, 7, 8]	Group44	9.09091	10	[BCL6, CBLB, CCL19, HLA-A, HSPH1, IL12B, JUNB, PTPRC, SOCS1, SYK]
R-HSA:373755	Semaphorin interactions	REACTOME_Pathways_18.08.2022	1.81628e-06	0.00104981	3.99308e-12	1.23786e-10	[-1]	Group45	13.8462	9	[CFL1, FES, HSP90AB1, PLXNA3, PLXNB1, PLXNC1, PTPRC, SEMA4A, SEMA7A]
GO:0051130	positive regulation of cellular component organization	GO_BiologicalProcess-EBI-UniProt-GOA-ACAP-ARAP_05.04.2022_00h00	3.01608e-08	1.91521e-05	3.99308e-12	1.23786e-10	[3, 4, 5]	Group45	4.19708	46	[ADRB2, ARHGEF15, BIK, BIN1, CAMK1, CCL19, CD53, CDC42, CNOT6, CXCL9, CYFIP1, DAB2IP, DBNL, FES, FNBP1L, GPX1, GRB2, GRN, HCK, HCLS1, HSPA1A, IQSEC1, LCP1, LYN, NAV3, NCK1, PLEK, PLXNA3, PLXNB1, PLXNC1, PPP1R15A, PTPRJ, RAB8B, RAC2, RAP1B, RAPGEF2, RGS2, SEMA4A, SEMA7A, SETX, SKIL, SYK, TIAM1, TLR6, TPM1, WASF2]
GO:0000904	cell morphogenesis involved in differentiation	GO_BiologicalProcess-EBI-UniProt-GOA-ACAP-ARAP_05.04.2022_00h00	2.14201e-07	0.000132591	3.99308e-12	1.23786e-10	[4, 5]	Group45	4.56323	35	[ABI1, ACTB, ACTN1, ARHGAP4, ATF4, BSG, CDC42, CFL1, CHL1, CTNND2, CYFIP1, DBNL, DOCK10, HSP90AB1, MYCBP2, NCAM1, PLXNA3, PLXNB1, PLXNC1, PTPN6, RAC2, RAPGEF2, RHOG, SEMA4A, SEMA6C, SEMA7A, SKIL, SLC9A3R1, SMOX, SPI1, SRGAP2, SULT4A1, TANC2, TIAM1, ZNF385A]
GO:0022604	regulation of cell morphogenesis	GO_BiologicalProcess-EBI-UniProt-GOA-ACAP-ARAP_05.04.2022_00h00	1.90818e-05	0.00978896	3.99308e-12	1.23786e-10	[4, 5]	Group45	5.50459	18	[CDC42, CFL1, CYFIP1, DBNL, FES, FGD4, FGR, FMNL1, HCK, PLXNA3, PLXNB1, PLXNC1, RAC2, RHOG, SEMA4A, SH3KBP1, SLC9A3R1, TPM1]
GO:0031344	regulation of cell projection organization	GO_BiologicalProcess-EBI-UniProt-GOA-ACAP-ARAP_05.04.2022_00h00	1.37774e-06	0.00080047	3.99308e-12	1.23786e-10	[4, 5]	Group45	4.43213	32	[ARHGAP4, CAMK1, CCL19, CDC42, CFL1, CYFIP1, DAB2IP, DBNL, FES, FNBP1L, GRN, LYN, MYLIP, NCK1, PLXNA3, PLXNB1, PLXNC1, RAB5A, RAB8B, RAC2, RAPGEF2, RGS2, RHOG, SEMA4A, SEMA6C, SEMA7A, SETX, SKIL, TANC2, TBC1D10B, TIAM1, WASF2]
GO:0032990	cell part morphogenesis	GO_BiologicalProcess-EBI-UniProt-GOA-ACAP-ARAP_05.04.2022_00h00	9.61487e-07	0.000572085	3.99308e-12	1.23786e-10	[4, 5]	Group45	4.50704	32	[ABI1, ACTB, ARHGAP4, BSG, CDC42, CFL1, CHL1, CTNND2, CYFIP1, DAB2IP, DBNL, DOCK10, HSP90AB1, MYCBP2, NCAM1, PLXNA3, PLXNB1, PLXNC1, RAC2, RAPGEF2, RHOG, SEMA4A, SEMA6C, SEMA7A, SKIL, SMOX, SRGAP2, SULT4A1, TANC2, TIAM1, UBB, WASF2]
GO:0031346	positive regulation of cell projection organization	GO_BiologicalProcess-EBI-UniProt-GOA-ACAP-ARAP_05.04.2022_00h00	1.50736e-07	9.39086e-05	3.99308e-12	1.23786e-10	[4, 5, 6]	Group45	6.23306	23	[CAMK1, CCL19, CDC42, CYFIP1, DAB2IP, DBNL, FES, FNBP1L, GRN, LYN, NCK1, PLXNA3, PLXNB1, PLXNC1, RAB8B, RAC2, RAPGEF2, RGS2, SEMA7A, SETX, SKIL, TIAM1, WASF2]
GO:0048858	cell projection morphogenesis	GO_BiologicalProcess-EBI-UniProt-GOA-ACAP-ARAP_05.04.2022_00h00	5.16677e-07	0.000314656	3.99308e-12	1.23786e-10	[4, 5, 6]	Group45	4.63768	32	[ABI1, ACTB, ARHGAP4, BSG, CDC42, CFL1, CHL1, CTNND2, CYFIP1, DAB2IP, DBNL, DOCK10, HSP90AB1, MYCBP2, NCAM1, PLXNA3, PLXNB1, PLXNC1, RAC2, RAPGEF2, RHOG, SEMA4A, SEMA6C, SEMA7A, SKIL, SMOX, SRGAP2, SULT4A1, TANC2, TIAM1, UBB, WASF2]
GO:0071526	semaphorin-plexin signaling pathway	GO_BiologicalProcess-EBI-UniProt-GOA-ACAP-ARAP_05.04.2022_00h00	1.36984e-06	0.000797249	3.99308e-12	1.23786e-10	[4, 5, 6]	Group45	17.0213	8	[ARHGDIA, NCAM1, PLXNA3, PLXNB1, PLXNC1, SEMA4A, SEMA6C, SEMA7A]
GO:0120035	regulation of plasma membrane bounded cell projection organization	GO_BiologicalProcess-EBI-UniProt-GOA-ACAP-ARAP_05.04.2022_00h00	2.25816e-06	0.00129393	3.99308e-12	1.23786e-10	[5, 6]	Group45	4.40967	31	[ARHGAP4, CAMK1, CCL19, CDC42, CFL1, CYFIP1, DAB2IP, DBNL, FES, FNBP1L, GRN, LYN, MYLIP, NCK1, PLXNA3, PLXNB1, PLXNC1, RAB5A, RAC2, RAPGEF2, RGS2, RHOG, SEMA4A, SEMA6C, SEMA7A, SETX, SKIL, TANC2, TBC1D10B, TIAM1, WASF2]
GO:0120039	plasma membrane bounded cell projection morphogenesis	GO_BiologicalProcess-EBI-UniProt-GOA-ACAP-ARAP_05.04.2022_00h00	4.26518e-07	0.000261029	3.99308e-12	1.23786e-10	[5, 6, 7]	Group45	4.67836	32	[ABI1, ACTB, ARHGAP4, BSG, CDC42, CFL1, CHL1, CTNND2, CYFIP1, DAB2IP, DBNL, DOCK10, HSP90AB1, MYCBP2, NCAM1, PLXNA3, PLXNB1, PLXNC1, RAC2, RAPGEF2, RHOG, SEMA4A, SEMA6C, SEMA7A, SKIL, SMOX, SRGAP2, SULT4A1, TANC2, TIAM1, UBB, WASF2]
GO:0031175	neuron projection development	GO_BiologicalProcess-EBI-UniProt-GOA-ACAP-ARAP_05.04.2022_00h00	9.55869e-08	6.00286e-05	3.99308e-12	1.23786e-10	[5, 6, 8, 9, 10]	Group45	4.19103	43	[ABI1, ACTB, ARHGAP4, BSG, CAMK1, CDC42, CFL1, CHL1, CTNND2, CYFIP1, DAB2IP, DBNL, DOCK10, FES, GRN, HSP90AB1, IQSEC1, JUN, LYN, MYCBP2, MYLIP, NCAM1, NCK1, PLXNA3, PLXNB1, PLXNC1, RAC2, RAPGEF2, RGS2, RHOG, SEMA4A, SEMA6C, SEMA7A, SETX, SKIL, SLC9A3R1, SMOX, SRGAP2, SULT4A1, TANC2, TIAM1, TNFRSF21, UBB]
GO:0048667	cell morphogenesis involved in neuron differentiation	GO_BiologicalProcess-EBI-UniProt-GOA-ACAP-ARAP_05.04.2022_00h00	8.49228e-07	0.000508688	3.99308e-12	1.23786e-10	[5, 6, 8, 9, 10]	Group45	4.81728	29	[ABI1, ACTB, ARHGAP4, BSG, CDC42, CFL1, CHL1, CTNND2, CYFIP1, DBNL, DOCK10, HSP90AB1, MYCBP2, NCAM1, PLXNA3, PLXNB1, PLXNC1, RAC2, RAPGEF2, RHOG, SEMA4A, SEMA6C, SEMA7A, SKIL, SLC9A3R1, SMOX, SULT4A1, TANC2, TIAM1]
GO:0048812	neuron projection morphogenesis	GO_BiologicalProcess-EBI-UniProt-GOA-ACAP-ARAP_05.04.2022_00h00	8.00724e-07	0.000481235	3.99308e-12	1.23786e-10	[6, 7, 8, 9, 10, 11]	Group45	4.63378	31	[ABI1, ACTB, ARHGAP4, BSG, CDC42, CFL1, CHL1, CTNND2, CYFIP1, DAB2IP, DBNL, DOCK10, HSP90AB1, MYCBP2, NCAM1, PLXNA3, PLXNB1, PLXNC1, RAC2, RAPGEF2, RHOG, SEMA4A, SEMA6C, SEMA7A, SKIL, SMOX, SRGAP2, SULT4A1, TANC2, TIAM1, UBB]
GO:0010975	regulation of neuron projection development	GO_BiologicalProcess-EBI-UniProt-GOA-ACAP-ARAP_05.04.2022_00h00	7.85023e-06	0.00422342	3.99308e-12	1.23786e-10	[6, 7, 9, 10, 11]	Group45	4.94624	23	[ARHGAP4, CAMK1, CFL1, CYFIP1, DAB2IP, DBNL, FES, GRN, LYN, MYLIP, NCK1, PLXNA3, PLXNB1, PLXNC1, RAPGEF2, RGS2, SEMA4A, SEMA6C, SEMA7A, SETX, SKIL, TANC2, TIAM1]
GO:0061564	axon development	GO_BiologicalProcess-EBI-UniProt-GOA-ACAP-ARAP_05.04.2022_00h00	5.14924e-05	0.0249738	3.99308e-12	1.23786e-10	[6, 7, 9, 10, 11]	Group45	4.38931	23	[ACTB, ARHGAP4, BSG, CHL1, CYFIP1, DBNL, GRN, HSP90AB1, JUN, MYCBP2, NCAM1, PLXNA3, PLXNB1, PLXNC1, RAC2, RHOG, SEMA4A, SEMA6C, SEMA7A, SKIL, SMOX, TIAM1, TNFRSF21]
GO:0050772	positive regulation of axonogenesis	GO_BiologicalProcess-EBI-UniProt-GOA-ACAP-ARAP_05.04.2022_00h00	8.38259e-05	0.038979	3.99308e-12	1.23786e-10	[5, 6, 7, 8, 9, 10, 11, 12, 13, 14]	Group45	9.87654	8	[CYFIP1, DBNL, PLXNA3, PLXNB1, PLXNC1, SEMA7A, SKIL, TIAM1]
R-HSA:194315	Signaling by Rho GTPases	REACTOME_Pathways_18.08.2022	5.25074e-16	3.581e-13	6.89362e-17	2.89532e-15	[-1]	Group46	6.78925	48	[ABI1, ACTB, ACTN1, ARAP3, ARHGAP12, ARHGAP17, ARHGAP29, ARHGAP4, ARHGAP45, ARHGDIA, ARHGDIG, ARHGEF15, ARPC1B, ARPC4, ARPC5, BTK, CDC42, CFL1, CKB, CYBA, CYFIP1, DEF6, DOCK10, ERBIN, FGD4, FMNL1, FNBP1L, GRB2, HSP90AB1, MRTFA, MSI2, NCF1, NCK1, NET1, NUP160, PIK3R3, PLXNB1, PRKCB, RAC2, RHOG, SRGAP2, TAGAP, TIAM1, TMEM59, TPM3, WASF2, WIPF1, YWHAG]
R-HSA:8980692	RHOA GTPase cycle	REACTOME_Pathways_18.08.2022	5.53011e-05	0.0267657	6.89362e-17	2.89532e-15	[-1]	Group46	7.48299	11	[ARAP3, ARHGAP29, ARHGAP4, ARHGAP45, ARHGDIA, ARHGEF15, DEF6, ERBIN, NET1, TAGAP, TIAM1]
R-HSA:9012999	RHO GTPase cycle	REACTOME_Pathways_18.08.2022	1.19251e-16	8.14485e-14	6.89362e-17	2.89532e-15	[-1]	Group46	8.68597	39	[ABI1, ACTB, ACTN1, ARAP3, ARHGAP12, ARHGAP17, ARHGAP29, ARHGAP4, ARHGAP45, ARHGDIA, ARHGDIG, ARHGEF15, CDC42, CKB, CYBA, CYFIP1, DEF6, DOCK10, ERBIN, FGD4, FMNL1, FNBP1L, GRB2, HSP90AB1, MSI2, NCF1, NCK1, NET1, PIK3R3, PLXNB1, RAC2, RHOG, SRGAP2, TAGAP, TIAM1, TMEM59, TPM3, WASF2, WIPF1]
R-HSA:9013148	CDC42 GTPase cycle	REACTOME_Pathways_18.08.2022	2.40359e-10	1.57435e-07	6.89362e-17	2.89532e-15	[-1]	Group46	11.6129	18	[ARAP3, ARHGAP17, ARHGAP29, ARHGAP4, ARHGAP45, ARHGDIA, ARHGDIG, ARHGEF15, CDC42, DEF6, DOCK10, FGD4, FMNL1, FNBP1L, SRGAP2, TAGAP, TIAM1, WIPF1]
R-HSA:9013149	RAC1 GTPase cycle	REACTOME_Pathways_18.08.2022	1.67303e-13	1.12428e-10	6.89362e-17	2.89532e-15	[-1]	Group46	12.4324	23	[ABI1, ARAP3, ARHGAP12, ARHGAP17, ARHGAP29, ARHGAP4, ARHGAP45, ARHGDIA, ARHGEF15, CDC42, CYBA, CYFIP1, DEF6, DOCK10, ERBIN, FMNL1, NCF1, PIK3R3, SRGAP2, TAGAP, TIAM1, WASF2, WIPF1]
R-HSA:9013404	RAC2 GTPase cycle	REACTOME_Pathways_18.08.2022	3.67755e-10	2.40512e-07	6.89362e-17	2.89532e-15	[-1]	Group46	15.9091	14	[ABI1, ARHGAP17, ARHGDIA, CDC42, CYBA, CYFIP1, DEF6, DOCK10, ERBIN, NCF1, PIK3R3, RAC2, TIAM1, WASF2]
R-HSA:9013423	RAC3 GTPase cycle	REACTOME_Pathways_18.08.2022	8.61957e-08	5.42171e-05	6.89362e-17	2.89532e-15	[-1]	Group46	12.766	12	[ABI1, ARAP3, ARHGAP17, CDC42, CYBA, CYFIP1, DOCK10, ERBIN, NCF1, SRGAP2, TIAM1, WASF2]
R-HSA:9716542	Signaling by Rho GTPases, Miro GTPases and RHOBTB3	REACTOME_Pathways_18.08.2022	1.25207e-15	8.51405e-13	6.89362e-17	2.89532e-15	[-1]	Group46	6.639	48	[ABI1, ACTB, ACTN1, ARAP3, ARHGAP12, ARHGAP17, ARHGAP29, ARHGAP4, ARHGAP45, ARHGDIA, ARHGDIG, ARHGEF15, ARPC1B, ARPC4, ARPC5, BTK, CDC42, CFL1, CKB, CYBA, CYFIP1, DEF6, DOCK10, ERBIN, FGD4, FMNL1, FNBP1L, GRB2, HSP90AB1, MRTFA, MSI2, NCF1, NCK1, NET1, NUP160, PIK3R3, PLXNB1, PRKCB, RAC2, RHOG, SRGAP2, TAGAP, TIAM1, TMEM59, TPM3, WASF2, WIPF1, YWHAG]
GO:0007264	small GTPase mediated signal transduction	GO_BiologicalProcess-EBI-UniProt-GOA-ACAP-ARAP_05.04.2022_00h00	4.52663e-13	3.03284e-10	6.89362e-17	2.89532e-15	[4, 5, 6]	Group46	6.90909	38	[ARHGAP12, ARHGAP17, ARHGAP29, ARHGAP4, ARHGAP45, ARHGDIA, ARHGDIG, ARHGEF15, BCL6, CADM4, CDC42, CFL1, CYFIP1, CYRIB, CYTH4, DAB2IP, DBNL, DEF6, DOCK10, DOK2, ERBIN, FGD4, GABARAP, GRB2, IQSEC1, JUN, LPAR6, MRAS, NET1, RAC2, RAP1B, RAP1GAP2, RAPGEF2, RHOG, SRGAP2, TAGAP, TIAM1, WASF2]
GO:0008047	enzyme activator activity	GO_BiologicalProcess-EBI-UniProt-GOA-ACAP-ARAP_05.04.2022_00h00	2.08416e-06	0.00119839	6.89362e-17	2.89532e-15	[5]	Group46	4.70588	28	[ABI1, AFAP1L2, ARAP3, ARHGAP12, ARHGAP17, ARHGAP29, ARHGAP4, ARHGAP45, ARHGDIA, ARHGDIG, ARHGEF15, ASAP2, BTK, DAB2IP, DBNL, GM2A, JUN, MRTFA, NCF1, PLXNB1, PPP1R15A, PSAP, RAP1GAP2, RAPGEF2, RGS2, SRGAP2, TAGAP, TBC1D10B]
GO:0043087	regulation of GTPase activity	GO_BiologicalProcess-EBI-UniProt-GOA-ACAP-ARAP_05.04.2022_00h00	1.5547e-08	9.96566e-06	6.89362e-17	2.89532e-15	[5]	Group46	6.56168	25	[ARAP3, ARHGAP12, ARHGAP29, ARHGAP45, ARHGEF15, ASAP2, BCL6, BIN1, CBLB, CCL19, DAB2IP, DOCK10, FGD4, IQSEC1, NET1, PLXNA3, PLXNB1, PLXNC1, RAP1GAP2, RAPGEF2, RHOG, S1PR1, SRGAP2, TBC1D10B, TIAM1]
GO:0051345	positive regulation of hydrolase activity	GO_BiologicalProcess-EBI-UniProt-GOA-ACAP-ARAP_05.04.2022_00h00	1.30513e-06	0.000762193	6.89362e-17	2.89532e-15	[5]	Group46	4.71545	29	[ARAP3, ARHGAP29, ARHGAP45, ARHGEF15, ASAP2, BCL2L10, BIN1, CCL19, DOCK10, GRN, HSP90AB1, HSPA1A, IQSEC1, LYN, MRTFA, NET1, PLEK, PLXNB1, PPP1R15A, PSAP, PTPRC, RAP1GAP2, RAPGEF2, RHOG, S1PR1, SRGAP2, SYK, TBC1D10B, TIAM1]
GO:0060589	nucleoside-triphosphatase regulator activity	GO_BiologicalProcess-EBI-UniProt-GOA-ACAP-ARAP_05.04.2022_00h00	2.17868e-07	0.000134642	6.89362e-17	2.89532e-15	[5]	Group46	5.27307	28	[ARAP3, ARHGAP12, ARHGAP17, ARHGAP29, ARHGAP4, ARHGAP45, ARHGDIA, ARHGDIG, ARHGEF15, ASAP2, CYTH4, DAB2IP, DEF6, DENND2D, DOCK10, FGD4, IQSEC1, JUN, MYCBP2, NET1, PLXNB1, RAP1GAP2, RAPGEF2, RGS2, SRGAP2, TAGAP, TBC1D10B, TIAM1]
GO:0007265	Ras protein signal transduction	GO_BiologicalProcess-EBI-UniProt-GOA-ACAP-ARAP_05.04.2022_00h00	2.00483e-10	1.31517e-07	6.89362e-17	2.89532e-15	[5, 6, 7]	Group46	7.27273	28	[ARHGAP17, ARHGAP29, ARHGAP4, ARHGDIA, ARHGDIG, BCL6, CADM4, CDC42, CFL1, CYFIP1, CYTH4, DAB2IP, DBNL, DOK2, ERBIN, GABARAP, GRB2, IQSEC1, JUN, LPAR6, MRAS, NET1, RAC2, RAP1B, RAPGEF2, RHOG, TIAM1, WASF2]
GO:0030695	GTPase regulator activity	GO_BiologicalProcess-EBI-UniProt-GOA-ACAP-ARAP_05.04.2022_00h00	2.17868e-07	0.000134642	6.89362e-17	2.89532e-15	[6]	Group46	5.27307	28	[ARAP3, ARHGAP12, ARHGAP17, ARHGAP29, ARHGAP4, ARHGAP45, ARHGDIA, ARHGDIG, ARHGEF15, ASAP2, CYTH4, DAB2IP, DEF6, DENND2D, DOCK10, FGD4, IQSEC1, JUN, MYCBP2, NET1, PLXNB1, RAP1GAP2, RAPGEF2, RGS2, SRGAP2, TAGAP, TBC1D10B, TIAM1]
GO:0043547	positive regulation of GTPase activity	GO_BiologicalProcess-EBI-UniProt-GOA-ACAP-ARAP_05.04.2022_00h00	3.69386e-06	0.00207595	6.89362e-17	2.89532e-15	[6]	Group46	6.2069	18	[ARAP3, ARHGAP29, ARHGAP45, ARHGEF15, ASAP2, BIN1, CCL19, DOCK10, IQSEC1, NET1, PLXNB1, RAP1GAP2, RAPGEF2, RHOG, S1PR1, SRGAP2, TBC1D10B, TIAM1]
GO:0051056	regulation of small GTPase mediated signal transduction	GO_BiologicalProcess-EBI-UniProt-GOA-ACAP-ARAP_05.04.2022_00h00	2.31979e-08	1.48003e-05	6.89362e-17	2.89532e-15	[5, 6, 7]	Group46	6.90691	23	[ARHGAP12, ARHGAP17, ARHGAP29, ARHGAP4, ARHGAP45, ARHGDIA, ARHGEF15, BCL6, CADM4, CYRIB, CYTH4, DAB2IP, DEF6, ERBIN, FGD4, GABARAP, IQSEC1, LPAR6, NET1, RAP1GAP2, SRGAP2, TAGAP, TIAM1]
GO:0005096	GTPase activator activity	GO_BiologicalProcess-EBI-UniProt-GOA-ACAP-ARAP_05.04.2022_00h00	9.31423e-07	0.000555128	6.89362e-17	2.89532e-15	[6, 7]	Group46	6.52921	19	[ARAP3, ARHGAP12, ARHGAP17, ARHGAP29, ARHGAP4, ARHGAP45, ARHGDIA, ARHGDIG, ARHGEF15, ASAP2, DAB2IP, JUN, PLXNB1, RAP1GAP2, RAPGEF2, RGS2, SRGAP2, TAGAP, TBC1D10B]
GO:0097190	apoptotic signaling pathway	GO_BiologicalProcess-EBI-UniProt-GOA-ACAP-ARAP_05.04.2022_00h00	7.58203e-06	0.0040943	2.79323e-17	1.20109e-15	[3, 4, 5]	Group47	4.3956	28	[ATF3, ATF4, BCL2L10, BIK, BTK, CD74, DAB2IP, DDIT4, DDX5, GABARAP, GPX1, HSPA1A, HSPB1, KRT18, MCL1, MKNK2, MRTFA, NCK1, PLEKHF1, PPP1R15A, PTPRC, SKIL, SLC35F6, SLC9A3R1, SPI1, TNFRSF1A, UBB, ZNF385A]
GO:0010563	negative regulation of phosphorus metabolic process	GO_BiologicalProcess-EBI-UniProt-GOA-ACAP-ARAP_05.04.2022_00h00	3.9609e-06	0.00221018	2.79323e-17	1.20109e-15	[4, 5, 6]	Group47	5.15695	23	[CADM4, CBLB, DAB2IP, DDIT4, DUSP1, DUSP6, GADD45B, HIPK3, HSPB1, IRAK3, JUN, LYN, NCK1, PLEK, PLPP3, PPP1R15A, PTPN6, PTPRC, PTPRJ, RGS2, SOCS1, SOCS3, YWHAG]
GO:1902531	regulation of intracellular signal transduction	GO_BiologicalProcess-EBI-UniProt-GOA-ACAP-ARAP_05.04.2022_00h00	7.71142e-16	5.25148e-13	2.79323e-17	1.20109e-15	[4, 5, 6]	Group47	4.48009	81	[ADRB2, AKT3, ARHGAP12, ARHGAP17, ARHGAP29, ARHGAP4, ARHGAP45, ARHGDIA, ARHGEF15, ATF3, BCL2L10, BCL6, CADM4, CCL19, CD74, CDC42, CMKLR1, CYRIB, CYTH4, DAB2IP, DDIT4, DDX5, DEF6, DUSP1, DUSP6, ERBIN, FGD4, FGR, FLT3, GABARAP, GADD45B, GNAI1, GPX1, GRB2, HCLS1, HCST, HIPK3, HSP90AB1, HSPA1A, HSPB1, IL12B, IQSEC1, IRAK3, JUN, LPAR6, LYN, MCL1, NCF1, NCK1, NET1, PIK3AP1, PIK3CD, PLEK, PLEKHF1, PLXNB…
GO:1902532	negative regulation of intracellular signal transduction	GO_BiologicalProcess-EBI-UniProt-GOA-ACAP-ARAP_05.04.2022_00h00	1.17046e-06	0.000688229	2.79323e-17	1.20109e-15	[4, 5, 6, 7]	Group47	4.96324	27	[ARHGAP12, ATF3, BCL2L10, BCL6, CD74, CYRIB, DAB2IP, DDIT4, DUSP1, DUSP6, ERBIN, GPX1, HIPK3, HSPA1A, HSPB1, IRAK3, LYN, MCL1, PLEK, PTPN6, PTPRC, PTPRJ, RGS2, SLC9A3R1, SPI1, TNIP3, ZNF385A]
GO:1902533	positive regulation of intracellular signal transduction	GO_BiologicalProcess-EBI-UniProt-GOA-ACAP-ARAP_05.04.2022_00h00	2.49279e-09	1.61782e-06	2.79323e-17	1.20109e-15	[4, 5, 6, 7]	Group47	4.48046	47	[ADRB2, AKT3, CCL19, CD74, CDC42, DAB2IP, DDX5, ERBIN, FGR, FLT3, GADD45B, GPX1, HCLS1, HCST, HSP90AB1, HSPA1A, IL12B, JUN, LPAR6, LYN, MCL1, NCF1, NCK1, NET1, PIK3AP1, PIK3CD, PLEKHF1, PLXNB1, PRKCB, PTPN6, PTPRC, PTPRJ, RAP1B, RAPGEF2, SASH1, SEMA7A, SKIL, SLC15A4, SLC9A3R1, SPI1, SYK, TCIM, TIFA, TLR6, TNFRSF1A, UBB, ZNF385A]
GO:0004707	MAP kinase activity	GO_BiologicalProcess-EBI-UniProt-GOA-ACAP-ARAP_05.04.2022_00h00	2.91795e-05	0.0145897	2.79323e-17	1.20109e-15	[5, 6, 7]	Group47	6.45161	14	[CCL19, DAB2IP, DUSP1, FLT3, HIPK3, IRAK3, LYN, PTPN6, PTPRC, PTPRJ, RGS2, SASH1, SYK, TLR6]
GO:0007169	transmembrane receptor protein tyrosine kinase signaling pathway	GO_BiologicalProcess-EBI-UniProt-GOA-ACAP-ARAP_05.04.2022_00h00	1.86528e-11	1.23108e-08	2.79323e-17	1.20109e-15	[5, 6, 7]	Group47	5.9816	39	[ABI1, ADRB2, AFAP1L2, BLNK, CADM4, CBLB, CRIM1, CYFIP1, DAB2IP, DDIT4, DOK2, ERBIN, FES, FGF12, FGR, FLT3, GAB1, GRB2, HCK, HSPB1, IL12B, IL31RA, LYN, NCF1, NCK1, PIK3CD, PIK3R3, PRKCB, PTPN18, PTPRJ, RAPGEF2, SETX, SH2D6, SLC9A3R1, SOCS1, SOCS3, SYK, TIAM1, TIPARP]
GO:0045936	negative regulation of phosphate metabolic process	GO_BiologicalProcess-EBI-UniProt-GOA-ACAP-ARAP_05.04.2022_00h00	3.81631e-06	0.00214095	2.79323e-17	1.20109e-15	[5, 6, 7]	Group47	5.16854	23	[CADM4, CBLB, DAB2IP, DDIT4, DUSP1, DUSP6, GADD45B, HIPK3, HSPB1, IRAK3, JUN, LYN, NCK1, PLEK, PLPP3, PPP1R15A, PTPN6, PTPRC, PTPRJ, RGS2, SOCS1, SOCS3, YWHAG]
GO:0031400	negative regulation of protein modification process	GO_BiologicalProcess-EBI-UniProt-GOA-ACAP-ARAP_05.04.2022_00h00	5.89595e-06	0.00323688	2.79323e-17	1.20109e-15	[5, 6, 7, 8]	Group47	4.77099	25	[CADM4, CBLB, DAB2IP, DDIT4, DUSP1, DUSP6, GADD45B, HIPK3, HSPA1A, HSPB1, IRAK3, JUN, LYN, NCK1, PLPP3, PPP1R15A, PTPN6, PTPRC, PTPRJ, RGS2, SOCS1, SOCS3, SPI1, TMEM59, YWHAG]
GO:0043409	negative regulation of MAPK cascade	GO_BiologicalProcess-EBI-UniProt-GOA-ACAP-ARAP_05.04.2022_00h00	6.35282e-05	0.030303	2.79323e-17	1.20109e-15	[5, 6, 7, 8]	Group47	6.81818	12	[ATF3, DAB2IP, DUSP1, DUSP6, HIPK3, IRAK3, LYN, PTPN6, PTPRC, PTPRJ, RGS2, SLC9A3R1]
GO:0043549	regulation of kinase activity	GO_BiologicalProcess-EBI-UniProt-GOA-ACAP-ARAP_05.04.2022_00h00	8.18941e-07	0.000491365	2.79323e-17	1.20109e-15	[5, 7, 8]	Group47	4.32692	36	[ABI1, ACTB, ADRB2, AFAP1L2, CAMK1, CBLB, CCL19, CCND1, CD74, CDC42, DAB2IP, DUSP1, FGR, FLT3, GADD45B, HIPK3, HSP90AB1, HSPB1, IL12B, IRAK3, LYN, NCF1, PIK3R3, PTPN6, PTPRC, PTPRJ, RAPGEF2, RGS2, SASH1, SLC9A3R1, SOCS1, SOCS3, SYK, TCIM, TLR6, YWHAG]
GO:0001932	regulation of protein phosphorylation	GO_BiologicalProcess-EBI-UniProt-GOA-ACAP-ARAP_05.04.2022_00h00	4.55099e-08	2.88533e-05	2.79323e-17	1.20109e-15	[6, 7, 8]	Group47	4.07125	48	[ABI1, ACTB, ADRB2, AFAP1L2, CADM4, CAMK1, CBLB, CCL19, CCND1, CD74, DAB2IP, DDIT4, DUSP1, DUSP6, FGR, FLT3, GADD45B, HCLS1, HIPK3, HSP90AB1, HSPA2, HSPB1, IL12B, IL21, IL31RA, IRAK3, JUN, LYN, NCF1, NCK1, PIK3R3, PLPP3, PTPN6, PTPRC, PTPRJ, RAPGEF2, RGS2, SASH1, SEMA7A, SLC9A3R1, SOCS1, SOCS3, SYK, TCIM, TLR6, TLR8, TNFRSF1A, YWHAG]
GO:0042326	negative regulation of phosphorylation	GO_BiologicalProcess-EBI-UniProt-GOA-ACAP-ARAP_05.04.2022_00h00	5.21304e-06	0.00288281	2.79323e-17	1.20109e-15	[6, 7, 8]	Group47	5.39846	21	[CADM4, CBLB, DAB2IP, DDIT4, DUSP1, DUSP6, GADD45B, HIPK3, HSPB1, IRAK3, JUN, LYN, NCK1, PLPP3, PTPN6, PTPRC, PTPRJ, RGS2, SOCS1, SOCS3, YWHAG]
GO:0001933	negative regulation of protein phosphorylation	GO_BiologicalProcess-EBI-UniProt-GOA-ACAP-ARAP_05.04.2022_00h00	6.77235e-07	0.00040905	2.79323e-17	1.20109e-15	[6, 7, 8, 9]	Group47	6.14035	21	[CADM4, CBLB, DAB2IP, DDIT4, DUSP1, DUSP6, GADD45B, HIPK3, HSPB1, IRAK3, JUN, LYN, NCK1, PLPP3, PTPN6, PTPRC, PTPRJ, RGS2, SOCS1, SOCS3, YWHAG]
GO:0018212	peptidyl-tyrosine modification	GO_BiologicalProcess-EBI-UniProt-GOA-ACAP-ARAP_05.04.2022_00h00	1.24413e-07	7.7758e-05	2.79323e-17	1.20109e-15	[7, 8]	Group47	5.89623	25	[ABI1, AFAP1L2, BTK, CADM4, CBLB, CD74, CRIM1, FES, FGR, FLT3, HCK, HCLS1, HIPK3, IL12B, IL21, IL31RA, LYN, NCF1, PTPN6, PTPRC, PTPRJ, SOCS1, SOCS3, SYK, TNFRSF1A]
GO:0045859	regulation of protein kinase activity	GO_BiologicalProcess-EBI-UniProt-GOA-ACAP-ARAP_05.04.2022_00h00	9.91105e-07	0.000587725	2.79323e-17	1.20109e-15	[6, 7, 8, 9]	Group47	4.5007	32	[ABI1, ACTB, ADRB2, AFAP1L2, CAMK1, CBLB, CCL19, CCND1, DAB2IP, DUSP1, FGR, FLT3, GADD45B, HIPK3, HSP90AB1, HSPB1, IL12B, IRAK3, LYN, NCF1, PTPN6, PTPRC, PTPRJ, RAPGEF2, RGS2, SASH1, SLC9A3R1, SOCS1, SYK, TCIM, TLR6, YWHAG]
GO:0018108	peptidyl-tyrosine phosphorylation	GO_BiologicalProcess-EBI-UniProt-GOA-ACAP-ARAP_05.04.2022_00h00	1.08644e-07	6.81201e-05	2.79323e-17	1.20109e-15	[7, 8, 9]	Group47	5.93824	25	[ABI1, AFAP1L2, BTK, CADM4, CBLB, CD74, CRIM1, FES, FGR, FLT3, HCK, HCLS1, HIPK3, IL12B, IL21, IL31RA, LYN, NCF1, PTPN6, PTPRC, PTPRJ, SOCS1, SOCS3, SYK, TNFRSF1A]
GO:0043405	regulation of MAP kinase activity	GO_BiologicalProcess-EBI-UniProt-GOA-ACAP-ARAP_05.04.2022_00h00	1.30929e-05	0.00687376	2.79323e-17	1.20109e-15	[6, 7, 8, 9, 10, 11]	Group47	6.93069	14	[CCL19, DAB2IP, DUSP1, FLT3, HIPK3, IRAK3, LYN, PTPN6, PTPRC, PTPRJ, RGS2, SASH1, SYK, TLR6]
GO:0050730	regulation of peptidyl-tyrosine phosphorylation	GO_BiologicalProcess-EBI-UniProt-GOA-ACAP-ARAP_05.04.2022_00h00	4.9228e-07	0.000300291	2.79323e-17	1.20109e-15	[7, 8, 9, 10]	Group47	6.81004	19	[ABI1, AFAP1L2, CADM4, CBLB, CD74, FLT3, HCLS1, IL12B, IL21, IL31RA, LYN, NCF1, PTPN6, PTPRC, PTPRJ, SOCS1, SOCS3, SYK, TNFRSF1A]
GO:0071900	regulation of protein serine/threonine kinase activity	GO_BiologicalProcess-EBI-UniProt-GOA-ACAP-ARAP_05.04.2022_00h00	1.34532e-05	0.007036	2.79323e-17	1.20109e-15	[7, 8, 9, 10]	Group47	5.07246	21	[ACTB, ADRB2, CAMK1, CCL19, CCND1, DAB2IP, DUSP1, FLT3, HIPK3, HSP90AB1, IRAK3, LYN, PTPN6, PTPRC, PTPRJ, RAPGEF2, RGS2, SASH1, SYK, TCIM, TLR6]
GO:0043407	negative regulation of MAP kinase activity	GO_BiologicalProcess-EBI-UniProt-GOA-ACAP-ARAP_05.04.2022_00h00	1.32431e-05	0.00693936	2.79323e-17	1.20109e-15	[6, 7, 8, 9, 10, 11, 12]	Group47	12.6984	8	[DAB2IP, DUSP1, HIPK3, IRAK3, LYN, PTPN6, PTPRJ, RGS2]
GO:0002694	regulation of leukocyte activation	GO_BiologicalProcess-EBI-UniProt-GOA-ACAP-ARAP_05.04.2022_00h00	2.11914e-07	0.000131387	3.57791e-12	1.14493e-10	[3, 4, 5]	Group48	4.73458	33	[ACTB, BCL6, BTK, CBLB, CCL19, CD209, CD74, CYRIB, FES, FGR, GRN, HLA-A, HLA-DOB, HSPH1, ID2, IL12B, IL21, IL31RA, JUNB, LYN, MYO18A, NCK1, PTPN6, PTPRC, RAC2, SH3KBP1, SLC15A4, SOCS1, SPI1, SYK, TLR6, TNFRSF21, ZFP36L1]
GO:0050777	negative regulation of immune response	GO_BiologicalProcess-EBI-UniProt-GOA-ACAP-ARAP_05.04.2022_00h00	1.82622e-05	0.00944155	3.57791e-12	1.14493e-10	[3, 4, 5]	Group48	7.18232	13	[BCL6, FGR, GPX1, GRN, HCK, HLA-A, IL12B, IRAK3, LYN, PTPN6, PTPRC, SPI1, SYK]
GO:0050866	negative regulation of cell activation	GO_BiologicalProcess-EBI-UniProt-GOA-ACAP-ARAP_05.04.2022_00h00	3.74982e-05	0.0185241	3.57791e-12	1.14493e-10	[3, 4, 5]	Group48	6.30631	14	[BCL6, BTK, CBLB, CD74, FGR, GRN, ID2, IL31RA, LYN, PTPN6, PTPRC, SOCS1, SPI1, TNFRSF21]
GO:0050867	positive regulation of cell activation	GO_BiologicalProcess-EBI-UniProt-GOA-ACAP-ARAP_05.04.2022_00h00	5.71345e-05	0.0274817	3.57791e-12	1.14493e-10	[3, 4, 5]	Group48	4.47154	22	[ACTB, BCL6, BTK, CCL19, CD209, CD74, CYRIB, FGR, HLA-A, HLA-DOB, HSPH1, IL12B, IL21, LYN, NCK1, PLEK, PTPN6, PTPRC, SH3KBP1, SOCS1, SYK, TLR6]
GO:0002275	myeloid cell activation involved in immune response	GO_BiologicalProcess-EBI-UniProt-GOA-ACAP-ARAP_05.04.2022_00h00	2.68674e-06	0.00152875	3.57791e-12	1.14493e-10	[4, 5]	Group48	10.2804	11	[BTK, FCER1G, FES, FGR, GRN, LYN, PIK3CD, PTPN6, RAC2, SPI1, SYK]
GO:0002695	negative regulation of leukocyte activation	GO_BiologicalProcess-EBI-UniProt-GOA-ACAP-ARAP_05.04.2022_00h00	1.10485e-05	0.00586673	3.57791e-12	1.14493e-10	[3, 4, 5, 6]	Group48	7.03518	14	[BCL6, BTK, CBLB, CD74, FGR, GRN, ID2, IL31RA, LYN, PTPN6, PTPRC, SOCS1, SPI1, TNFRSF21]
GO:0002696	positive regulation of leukocyte activation	GO_BiologicalProcess-EBI-UniProt-GOA-ACAP-ARAP_05.04.2022_00h00	9.30865e-05	0.0428198	3.57791e-12	1.14493e-10	[3, 4, 5, 6]	Group48	4.43975	21	[ACTB, BCL6, BTK, CCL19, CD209, CD74, CYRIB, FGR, HLA-A, HLA-DOB, HSPH1, IL12B, IL21, LYN, NCK1, PTPN6, PTPRC, SH3KBP1, SOCS1, SYK, TLR6]
GO:0002703	regulation of leukocyte mediated immunity	GO_BiologicalProcess-EBI-UniProt-GOA-ACAP-ARAP_05.04.2022_00h00	6.77953e-06	0.00369485	3.57791e-12	1.14493e-10	[4, 5]	Group48	6.53061	16	[BCL6, BTK, CADM1, CYRIB, FES, FGR, HLA-A, IL12B, IL21, LYN, PTPN6, PTPRC, RAC2, SLC15A4, SPI1, SYK]
GO:0042113	B cell activation	GO_BiologicalProcess-EBI-UniProt-GOA-ACAP-ARAP_05.04.2022_00h00	1.79231e-09	1.1668e-06	3.57791e-12	1.14493e-10	[4, 5]	Group48	7.04607	26	[BCL6, BLNK, BTK, CD74, CMTM7, DOCK10, FLT3, ID2, IL21, IRF2BP2, IRF8, KLF6, LYN, MFNG, PIK3CD, PIK3R3, PRKCB, PTPN6, PTPRC, PTPRJ, SH3KBP1, SLC15A4, SPI1, SYK, TNFRSF21, ZFP36L1]
GO:0046651	lymphocyte proliferation	GO_BiologicalProcess-EBI-UniProt-GOA-ACAP-ARAP_05.04.2022_00h00	1.15395e-05	0.00610442	3.57791e-12	1.14493e-10	[4, 5]	Group48	5.71429	18	[BCL6, BTK, CADM1, CBLB, CCL19, CD209, CD74, FLT3, HLA-A, IL12B, IL21, LYN, NCK1, PTPN6, PTPRC, RAC2, SYK, TNFRSF21]
GO:0070663	regulation of leukocyte proliferation	GO_BiologicalProcess-EBI-UniProt-GOA-ACAP-ARAP_05.04.2022_00h00	2.60225e-05	0.0131674	3.57791e-12	1.14493e-10	[4, 5]	Group48	5.86081	16	[BCL6, BTK, CBLB, CCL19, CD209, CD74, HLA-A, IL12B, IL21, LYN, NCK1, PTPN6, PTPRC, RAC2, SYK, TNFRSF21]
GO:0051249	regulation of lymphocyte activation	GO_BiologicalProcess-EBI-UniProt-GOA-ACAP-ARAP_05.04.2022_00h00	6.63058e-06	0.0036203	3.57791e-12	1.14493e-10	[4, 5, 6]	Group48	4.52261	27	[ACTB, BCL6, BTK, CBLB, CCL19, CD209, CD74, CYRIB, FGR, HLA-A, HLA-DOB, HSPH1, ID2, IL12B, IL21, JUNB, LYN, NCK1, PTPN6, PTPRC, RAC2, SH3KBP1, SLC15A4, SOCS1, SYK, TNFRSF21, ZFP36L1]
GO:0032944	regulation of mononuclear cell proliferation	GO_BiologicalProcess-EBI-UniProt-GOA-ACAP-ARAP_05.04.2022_00h00	8.74957e-06	0.00468102	3.57791e-12	1.14493e-10	[5, 6]	Group48	6.4	16	[BCL6, BTK, CBLB, CCL19, CD209, CD74, HLA-A, IL12B, IL21, LYN, NCK1, PTPN6, PTPRC, RAC2, SYK, TNFRSF21]
GO:1903037	regulation of leukocyte cell-cell adhesion	GO_BiologicalProcess-EBI-UniProt-GOA-ACAP-ARAP_05.04.2022_00h00	2.93734e-05	0.0146573	3.57791e-12	1.14493e-10	[5, 6]	Group48	5.13514	19	[ACTB, BCL6, CBLB, CCL19, CD209, CD74, CYRIB, HLA-A, HLA-DOB, HSPH1, IL12B, IL21, LYN, NCK1, PTPN6, PTPRC, SOCS1, SYK, TNFRSF21]
GO:1903706	regulation of hemopoiesis	GO_BiologicalProcess-EBI-UniProt-GOA-ACAP-ARAP_05.04.2022_00h00	1.2792e-06	0.000748334	3.57791e-12	1.14493e-10	[3, 4, 5, 6, 7, 8]	Group48	5.51559	23	[ACTB, BCL6, BTK, CCL19, CD74, CDK6, FES, FOS, HCLS1, HSPA1A, ID2, IL12B, JUNB, LYN, PTPN6, PTPRC, SOCS1, SPI1, SYK, TCIM, TMEM178A, TNFRSF11B, ZFP36L1]
GO:0050670	regulation of lymphocyte proliferation	GO_BiologicalProcess-EBI-UniProt-GOA-ACAP-ARAP_05.04.2022_00h00	6.77953e-06	0.00369485	3.57791e-12	1.14493e-10	[5, 6, 7]	Group48	6.53061	16	[BCL6, BTK, CBLB, CCL19, CD209, CD74, HLA-A, IL12B, IL21, LYN, NCK1, PTPN6, PTPRC, RAC2, SYK, TNFRSF21]
GO:0050863	regulation of T cell activation	GO_BiologicalProcess-EBI-UniProt-GOA-ACAP-ARAP_05.04.2022_00h00	4.26719e-06	0.00237256	3.57791e-12	1.14493e-10	[5, 6, 7]	Group48	5.46875	21	[ACTB, BCL6, CBLB, CCL19, CD209, CD74, CYRIB, HLA-A, HLA-DOB, HSPH1, IL12B, IL21, JUNB, LYN, NCK1, PTPN6, PTPRC, RAC2, SOCS1, SYK, TNFRSF21]
GO:1902105	regulation of leukocyte differentiation	GO_BiologicalProcess-EBI-UniProt-GOA-ACAP-ARAP_05.04.2022_00h00	9.07437e-07	0.000542648	3.57791e-12	1.14493e-10	[4, 5, 6, 7, 8, 9]	Group48	6.26959	20	[ACTB, BCL6, BTK, CCL19, CD74, CDK6, FES, FOS, HCLS1, ID2, IL12B, JUNB, LYN, PTPN6, PTPRC, SOCS1, SYK, TMEM178A, TNFRSF11B, ZFP36L1]
GO:0018212	peptidyl-tyrosine modification	GO_BiologicalProcess-EBI-UniProt-GOA-ACAP-ARAP_05.04.2022_00h00	1.24413e-07	7.7758e-05	3.57791e-12	1.14493e-10	[7, 8]	Group48	5.89623	25	[ABI1, AFAP1L2, BTK, CADM4, CBLB, CD74, CRIM1, FES, FGR, FLT3, HCK, HCLS1, HIPK3, IL12B, IL21, IL31RA, LYN, NCF1, PTPN6, PTPRC, PTPRJ, SOCS1, SOCS3, SYK, TNFRSF1A]
GO:0018108	peptidyl-tyrosine phosphorylation	GO_BiologicalProcess-EBI-UniProt-GOA-ACAP-ARAP_05.04.2022_00h00	1.08644e-07	6.81201e-05	3.57791e-12	1.14493e-10	[7, 8, 9]	Group48	5.93824	25	[ABI1, AFAP1L2, BTK, CADM4, CBLB, CD74, CRIM1, FES, FGR, FLT3, HCK, HCLS1, HIPK3, IL12B, IL21, IL31RA, LYN, NCF1, PTPN6, PTPRC, PTPRJ, SOCS1, SOCS3, SYK, TNFRSF1A]
GO:0045619	regulation of lymphocyte differentiation	GO_BiologicalProcess-EBI-UniProt-GOA-ACAP-ARAP_05.04.2022_00h00	8.14461e-05	0.0380353	3.57791e-12	1.14493e-10	[5, 6, 7, 8, 9, 10, 11]	Group48	6.2201	13	[ACTB, BCL6, BTK, CCL19, CD74, ID2, IL12B, JUNB, PTPN6, PTPRC, SOCS1, SYK, ZFP36L1]
GO:0002699	positive regulation of immune effector process	GO_BiologicalProcess-EBI-UniProt-GOA-ACAP-ARAP_05.04.2022_00h00	2.81206e-07	0.000173504	1.18169e-11	3.54506e-10	[3, 4, 5]	Group49	7.0632	19	[BTK, CADM1, CCL19, CD74, CYRIB, FES, FGR, HLA-A, IL12B, IL21, LYN, MYO18A, PTPN6, PTPRC, PTPRJ, RAC2, SEMA7A, SPI1, SYK]
GO:0050866	negative regulation of cell activation	GO_BiologicalProcess-EBI-UniProt-GOA-ACAP-ARAP_05.04.2022_00h00	3.74982e-05	0.0185241	1.18169e-11	3.54506e-10	[3, 4, 5]	Group49	6.30631	14	[BCL6, BTK, CBLB, CD74, FGR, GRN, ID2, IL31RA, LYN, PTPN6, PTPRC, SOCS1, SPI1, TNFRSF21]
GO:0002695	negative regulation of leukocyte activation	GO_BiologicalProcess-EBI-UniProt-GOA-ACAP-ARAP_05.04.2022_00h00	1.10485e-05	0.00586673	1.18169e-11	3.54506e-10	[3, 4, 5, 6]	Group49	7.03518	14	[BCL6, BTK, CBLB, CD74, FGR, GRN, ID2, IL31RA, LYN, PTPN6, PTPRC, SOCS1, SPI1, TNFRSF21]
GO:0046651	lymphocyte proliferation	GO_BiologicalProcess-EBI-UniProt-GOA-ACAP-ARAP_05.04.2022_00h00	1.15395e-05	0.00610442	1.18169e-11	3.54506e-10	[4, 5]	Group49	5.71429	18	[BCL6, BTK, CADM1, CBLB, CCL19, CD209, CD74, FLT3, HLA-A, IL12B, IL21, LYN, NCK1, PTPN6, PTPRC, RAC2, SYK, TNFRSF21]
GO:0070663	regulation of leukocyte proliferation	GO_BiologicalProcess-EBI-UniProt-GOA-ACAP-ARAP_05.04.2022_00h00	2.60225e-05	0.0131674	1.18169e-11	3.54506e-10	[4, 5]	Group49	5.86081	16	[BCL6, BTK, CBLB, CCL19, CD209, CD74, HLA-A, IL12B, IL21, LYN, NCK1, PTPN6, PTPRC, RAC2, SYK, TNFRSF21]
GO:0007167	enzyme-linked receptor protein signaling pathway	GO_BiologicalProcess-EBI-UniProt-GOA-ACAP-ARAP_05.04.2022_00h00	4.17127e-09	2.69881e-06	1.18169e-11	3.54506e-10	[4, 5, 6]	Group49	4.46602	46	[ABI1, ADRB2, AFAP1L2, BLNK, CADM4, CBLB, CRIM1, CYFIP1, DAB2IP, DDIT4, DDX5, DOK2, ERBIN, FES, FGF12, FGR, FLT3, FOS, GAB1, GRB2, HCK, HSP90AB1, HSPA1A, HSPB1, IL12B, IL31RA, JUN, LYN, NCF1, NCK1, PIK3CD, PIK3R3, PRKCB, PTPN18, PTPRJ, RAPGEF2, SETX, SH2D6, SKIL, SLC9A3R1, SOCS1, SOCS3, SPI1, SYK, TIAM1, TIPARP]
GO:0019221	cytokine-mediated signaling pathway	GO_BiologicalProcess-EBI-UniProt-GOA-ACAP-ARAP_05.04.2022_00h00	2.57557e-05	0.0130581	1.18169e-11	3.54506e-10	[4, 5, 6]	Group49	4.59082	23	[CCL19, CD74, CMKLR1, CNOT6, CNTFR, CXCL9, FCER1G, FLT3, HCK, HSPA1A, IL12B, IL2RB, IL31RA, IRAK3, KRT18, PTPN6, PTPRC, PTPRJ, SOCS1, SPI1, SYK, TNFRSF1A, XCR1]
GO:0032944	regulation of mononuclear cell proliferation	GO_BiologicalProcess-EBI-UniProt-GOA-ACAP-ARAP_05.04.2022_00h00	8.74957e-06	0.00468102	1.18169e-11	3.54506e-10	[5, 6]	Group49	6.4	16	[BCL6, BTK, CBLB, CCL19, CD209, CD74, HLA-A, IL12B, IL21, LYN, NCK1, PTPN6, PTPRC, RAC2, SYK, TNFRSF21]
GO:1903037	regulation of leukocyte cell-cell adhesion	GO_BiologicalProcess-EBI-UniProt-GOA-ACAP-ARAP_05.04.2022_00h00	2.93734e-05	0.0146573	1.18169e-11	3.54506e-10	[5, 6]	Group49	5.13514	19	[ACTB, BCL6, CBLB, CCL19, CD209, CD74, CYRIB, HLA-A, HLA-DOB, HSPH1, IL12B, IL21, LYN, NCK1, PTPN6, PTPRC, SOCS1, SYK, TNFRSF21]
GO:0007169	transmembrane receptor protein tyrosine kinase signaling pathway	GO_BiologicalProcess-EBI-UniProt-GOA-ACAP-ARAP_05.04.2022_00h00	1.86528e-11	1.23108e-08	1.18169e-11	3.54506e-10	[5, 6, 7]	Group49	5.9816	39	[ABI1, ADRB2, AFAP1L2, BLNK, CADM4, CBLB, CRIM1, CYFIP1, DAB2IP, DDIT4, DOK2, ERBIN, FES, FGF12, FGR, FLT3, GAB1, GRB2, HCK, HSPB1, IL12B, IL31RA, LYN, NCF1, NCK1, PIK3CD, PIK3R3, PRKCB, PTPN18, PTPRJ, RAPGEF2, SETX, SH2D6, SLC9A3R1, SOCS1, SOCS3, SYK, TIAM1, TIPARP]
GO:0050670	regulation of lymphocyte proliferation	GO_BiologicalProcess-EBI-UniProt-GOA-ACAP-ARAP_05.04.2022_00h00	6.77953e-06	0.00369485	1.18169e-11	3.54506e-10	[5, 6, 7]	Group49	6.53061	16	[BCL6, BTK, CBLB, CCL19, CD209, CD74, HLA-A, IL12B, IL21, LYN, NCK1, PTPN6, PTPRC, RAC2, SYK, TNFRSF21]
GO:0050863	regulation of T cell activation	GO_BiologicalProcess-EBI-UniProt-GOA-ACAP-ARAP_05.04.2022_00h00	4.26719e-06	0.00237256	1.18169e-11	3.54506e-10	[5, 6, 7]	Group49	5.46875	21	[ACTB, BCL6, CBLB, CCL19, CD209, CD74, CYRIB, HLA-A, HLA-DOB, HSPH1, IL12B, IL21, JUNB, LYN, NCK1, PTPN6, PTPRC, RAC2, SOCS1, SYK, TNFRSF21]
GO:1903039	positive regulation of leukocyte cell-cell adhesion	GO_BiologicalProcess-EBI-UniProt-GOA-ACAP-ARAP_05.04.2022_00h00	7.62177e-06	0.00410813	1.18169e-11	3.54506e-10	[5, 6, 7]	Group49	6.15942	17	[ACTB, BCL6, CCL19, CD209, CD74, CYRIB, HLA-A, HLA-DOB, HSPH1, IL12B, IL21, LYN, NCK1, PTPN6, PTPRC, SOCS1, SYK]
GO:0050870	positive regulation of T cell activation	GO_BiologicalProcess-EBI-UniProt-GOA-ACAP-ARAP_05.04.2022_00h00	2.50872e-06	0.00143499	1.18169e-11	3.54506e-10	[5, 6, 7, 8]	Group49	6.69291	17	[ACTB, BCL6, CCL19, CD209, CD74, CYRIB, HLA-A, HLA-DOB, HSPH1, IL12B, IL21, LYN, NCK1, PTPN6, PTPRC, SOCS1, SYK]
GO:0043549	regulation of kinase activity	GO_BiologicalProcess-EBI-UniProt-GOA-ACAP-ARAP_05.04.2022_00h00	8.18941e-07	0.000491365	1.18169e-11	3.54506e-10	[5, 7, 8]	Group49	4.32692	36	[ABI1, ACTB, ADRB2, AFAP1L2, CAMK1, CBLB, CCL19, CCND1, CD74, CDC42, DAB2IP, DUSP1, FGR, FLT3, GADD45B, HIPK3, HSP90AB1, HSPB1, IL12B, IRAK3, LYN, NCF1, PIK3R3, PTPN6, PTPRC, PTPRJ, RAPGEF2, RGS2, SASH1, SLC9A3R1, SOCS1, SOCS3, SYK, TCIM, TLR6, YWHAG]
GO:0001932	regulation of protein phosphorylation	GO_BiologicalProcess-EBI-UniProt-GOA-ACAP-ARAP_05.04.2022_00h00	4.55099e-08	2.88533e-05	1.18169e-11	3.54506e-10	[6, 7, 8]	Group49	4.07125	48	[ABI1, ACTB, ADRB2, AFAP1L2, CADM4, CAMK1, CBLB, CCL19, CCND1, CD74, DAB2IP, DDIT4, DUSP1, DUSP6, FGR, FLT3, GADD45B, HCLS1, HIPK3, HSP90AB1, HSPA2, HSPB1, IL12B, IL21, IL31RA, IRAK3, JUN, LYN, NCF1, NCK1, PIK3R3, PLPP3, PTPN6, PTPRC, PTPRJ, RAPGEF2, RGS2, SASH1, SEMA7A, SLC9A3R1, SOCS1, SOCS3, SYK, TCIM, TLR6, TLR8, TNFRSF1A, YWHAG]
GO:0018212	peptidyl-tyrosine modification	GO_BiologicalProcess-EBI-UniProt-GOA-ACAP-ARAP_05.04.2022_00h00	1.24413e-07	7.7758e-05	1.18169e-11	3.54506e-10	[7, 8]	Group49	5.89623	25	[ABI1, AFAP1L2, BTK, CADM4, CBLB, CD74, CRIM1, FES, FGR, FLT3, HCK, HCLS1, HIPK3, IL12B, IL21, IL31RA, LYN, NCF1, PTPN6, PTPRC, PTPRJ, SOCS1, SOCS3, SYK, TNFRSF1A]
GO:0045859	regulation of protein kinase activity	GO_BiologicalProcess-EBI-UniProt-GOA-ACAP-ARAP_05.04.2022_00h00	9.91105e-07	0.000587725	1.18169e-11	3.54506e-10	[6, 7, 8, 9]	Group49	4.5007	32	[ABI1, ACTB, ADRB2, AFAP1L2, CAMK1, CBLB, CCL19, CCND1, DAB2IP, DUSP1, FGR, FLT3, GADD45B, HIPK3, HSP90AB1, HSPB1, IL12B, IRAK3, LYN, NCF1, PTPN6, PTPRC, PTPRJ, RAPGEF2, RGS2, SASH1, SLC9A3R1, SOCS1, SYK, TCIM, TLR6, YWHAG]
GO:0007260	tyrosine phosphorylation of STAT protein	GO_BiologicalProcess-EBI-UniProt-GOA-ACAP-ARAP_05.04.2022_00h00	1.89628e-05	0.00974689	1.18169e-11	3.54506e-10	[6, 7, 8, 9, 10]	Group49	10.4651	9	[FLT3, HCLS1, IL12B, IL21, IL31RA, LYN, SOCS1, SOCS3, TNFRSF1A]
GO:0018108	peptidyl-tyrosine phosphorylation	GO_BiologicalProcess-EBI-UniProt-GOA-ACAP-ARAP_05.04.2022_00h00	1.08644e-07	6.81201e-05	1.18169e-11	3.54506e-10	[7, 8, 9]	Group49	5.93824	25	[ABI1, AFAP1L2, BTK, CADM4, CBLB, CD74, CRIM1, FES, FGR, FLT3, HCK, HCLS1, HIPK3, IL12B, IL21, IL31RA, LYN, NCF1, PTPN6, PTPRC, PTPRJ, SOCS1, SOCS3, SYK, TNFRSF1A]
GO:0050730	regulation of peptidyl-tyrosine phosphorylation	GO_BiologicalProcess-EBI-UniProt-GOA-ACAP-ARAP_05.04.2022_00h00	4.9228e-07	0.000300291	1.18169e-11	3.54506e-10	[7, 8, 9, 10]	Group49	6.81004	19	[ABI1, AFAP1L2, CADM4, CBLB, CD74, FLT3, HCLS1, IL12B, IL21, IL31RA, LYN, NCF1, PTPN6, PTPRC, PTPRJ, SOCS1, SOCS3, SYK, TNFRSF1A]
GO:0042509	regulation of tyrosine phosphorylation of STAT protein	GO_BiologicalProcess-EBI-UniProt-GOA-ACAP-ARAP_05.04.2022_00h00	1.28443e-05	0.00675608	1.18169e-11	3.54506e-10	[7, 8, 9, 10, 11]	Group49	10.9756	9	[FLT3, HCLS1, IL12B, IL21, IL31RA, LYN, SOCS1, SOCS3, TNFRSF1A]
GO:0050731	positive regulation of peptidyl-tyrosine phosphorylation	GO_BiologicalProcess-EBI-UniProt-GOA-ACAP-ARAP_05.04.2022_00h00	1.92128e-05	0.00983695	1.18169e-11	3.54506e-10	[7, 8, 9, 10, 11]	Group49	6.69856	14	[ABI1, AFAP1L2, CD74, FLT3, HCLS1, IL12B, IL21, IL31RA, LYN, NCF1, PTPRC, PTPRJ, SYK, TNFRSF1A]
R-HSA:168249	Innate Immune System	REACTOME_Pathways_18.08.2022	3.9124e-13	2.62522e-10	2.97762e-19	1.45903e-17	[-1]	Group50	5.145	55	[ABI1, ACTB, ARHGAP45, ARPC1B, ARPC4, ARPC5, BTK, CAPZA1, CD209, CD53, CDC42, CFL1, CTSK, CTSS, CYBA, CYFIP1, DBNL, DUSP6, FCER1G, FGR, FOS, GM2A, GRB2, GRN, HCK, HLA-A, HSP90AB1, HSPA1A, HUWE1, IRAK3, JUN, LYN, NCF1, NCK1, PDXK, PLEKHO2, PSAP, PTPN6, PTPRC, PTPRJ, RAC2, RAP1B, RHOG, SIGLEC15, SLC15A4, SOCS1, SYK, TIFA, TIMP2, TLR6, TLR8, UBB, UNC93B1, WASF2, WIPF1]
R-HSA:194138	Signaling by VEGF	REACTOME_Pathways_18.08.2022	2.94551e-06	0.00166422	2.97762e-19	1.45903e-17	[-1]	Group50	10.1852	11	[ABI1, ACTB, AKT3, CDC42, CYBA, CYFIP1, HSPB1, NCF1, NCK1, PRKCB, WASF2]
R-HSA:194315	Signaling by Rho GTPases	REACTOME_Pathways_18.08.2022	5.25074e-16	3.581e-13	2.97762e-19	1.45903e-17	[-1]	Group50	6.78925	48	[ABI1, ACTB, ACTN1, ARAP3, ARHGAP12, ARHGAP17, ARHGAP29, ARHGAP4, ARHGAP45, ARHGDIA, ARHGDIG, ARHGEF15, ARPC1B, ARPC4, ARPC5, BTK, CDC42, CFL1, CKB, CYBA, CYFIP1, DEF6, DOCK10, ERBIN, FGD4, FMNL1, FNBP1L, GRB2, HSP90AB1, MRTFA, MSI2, NCF1, NCK1, NET1, NUP160, PIK3R3, PLXNB1, PRKCB, RAC2, RHOG, SRGAP2, TAGAP, TIAM1, TMEM59, TPM3, WASF2, WIPF1, YWHAG]
R-HSA:195258	RHO GTPase Effectors	REACTOME_Pathways_18.08.2022	1.65394e-08	1.05852e-05	2.97762e-19	1.45903e-17	[-1]	Group50	7.03364	23	[ABI1, ACTB, ARPC1B, ARPC4, ARPC5, BTK, CDC42, CFL1, CYBA, CYFIP1, FMNL1, GRB2, MRTFA, NCF1, NCK1, NUP160, PRKCB, RAC2, RHOG, SRGAP2, WASF2, WIPF1, YWHAG]
R-HSA:2029480	Fcgamma receptor (FCGR) dependent phagocytosis	REACTOME_Pathways_18.08.2022	7.28296e-15	4.93056e-12	2.97762e-19	1.45903e-17	[-1]	Group50	20.9302	18	[ABI1, ACTB, ARPC1B, ARPC4, ARPC5, BTK, CDC42, CFL1, CYFIP1, FGR, GRB2, HCK, HSP90AB1, LYN, NCK1, SYK, WASF2, WIPF1]
R-HSA:2029482	Regulation of actin dynamics for phagocytic cup formation	REACTOME_Pathways_18.08.2022	1.04364e-13	7.03415e-11	2.97762e-19	1.45903e-17	[-1]	Group50	24.5902	15	[ABI1, ACTB, ARPC1B, ARPC4, ARPC5, BTK, CDC42, CFL1, CYFIP1, GRB2, HSP90AB1, NCK1, SYK, WASF2, WIPF1]
R-HSA:3928662	EPHB-mediated forward signaling	REACTOME_Pathways_18.08.2022	5.54654e-07	0.000337229	2.97762e-19	1.45903e-17	[-1]	Group50	19.0476	8	[ACTB, ARPC1B, ARPC4, ARPC5, CDC42, CFL1, LYN, TIAM1]
R-HSA:4420097	VEGFA-VEGFR2 Pathway	REACTOME_Pathways_18.08.2022	1.23701e-06	0.00072489	2.97762e-19	1.45903e-17	[-1]	Group50	11.1111	11	[ABI1, ACTB, AKT3, CDC42, CYBA, CYFIP1, HSPB1, NCF1, NCK1, PRKCB, WASF2]
R-HSA:5663213	RHO GTPases Activate WASPs and WAVEs	REACTOME_Pathways_18.08.2022	5.58127e-13	3.72829e-10	2.97762e-19	1.45903e-17	[-1]	Group50	33.3333	12	[ABI1, ACTB, ARPC1B, ARPC4, ARPC5, BTK, CDC42, CYFIP1, GRB2, NCK1, WASF2, WIPF1]
R-HSA:9006934	Signaling by Receptor Tyrosine Kinases	REACTOME_Pathways_18.08.2022	1.10674e-08	7.10527e-06	2.97762e-19	1.45903e-17	[-1]	Group50	5.75816	30	[ABI1, ACTB, AKT3, CDC42, CYBA, CYFIP1, DUSP6, ERBIN, FES, FLT3, FOS, GAB1, GRB2, HSPB1, ID2, JUNB, LYN, NCF1, NCK1, PIK3R3, PRKCB, PTPN18, PTPN6, PTPRJ, RAP1B, SH3KBP1, SOCS1, TIAM1, UBB, WASF2]
R-HSA:9013404	RAC2 GTPase cycle	REACTOME_Pathways_18.08.2022	3.67755e-10	2.40512e-07	2.97762e-19	1.45903e-17	[-1]	Group50	15.9091	14	[ABI1, ARHGAP17, ARHGDIA, CDC42, CYBA, CYFIP1, DEF6, DOCK10, ERBIN, NCF1, PIK3R3, RAC2, TIAM1, WASF2]
R-HSA:9013423	RAC3 GTPase cycle	REACTOME_Pathways_18.08.2022	8.61957e-08	5.42171e-05	2.97762e-19	1.45903e-17	[-1]	Group50	12.766	12	[ABI1, ARAP3, ARHGAP17, CDC42, CYBA, CYFIP1, DOCK10, ERBIN, NCF1, SRGAP2, TIAM1, WASF2]
R-HSA:9658195	Leishmania infection	REACTOME_Pathways_18.08.2022	7.38887e-10	4.81754e-07	2.97762e-19	1.45903e-17	[-1]	Group50	8.66142	22	[ABI1, ACTB, ADRB2, ARPC1B, ARPC4, ARPC5, BTK, CDC42, CYBA, CYFIP1, FGR, GNAI1, GNG2, GRB2, HCK, HSP90AB1, JUN, LYN, NCK1, SYK, WASF2, WIPF1]
R-HSA:9664407	Parasite infection	REACTOME_Pathways_18.08.2022	2.83031e-15	1.92178e-12	2.97762e-19	1.45903e-17	[-1]	Group50	27.1186	16	[ABI1, ACTB, ARPC1B, ARPC4, ARPC5, BTK, CDC42, CYFIP1, FGR, GRB2, HCK, LYN, NCK1, SYK, WASF2, WIPF1]
R-HSA:9664417	Leishmania phagocytosis	REACTOME_Pathways_18.08.2022	2.83031e-15	1.92178e-12	2.97762e-19	1.45903e-17	[-1]	Group50	27.1186	16	[ABI1, ACTB, ARPC1B, ARPC4, ARPC5, BTK, CDC42, CYFIP1, FGR, GRB2, HCK, LYN, NCK1, SYK, WASF2, WIPF1]
R-HSA:9664422	FCGR3A-mediated phagocytosis	REACTOME_Pathways_18.08.2022	2.83031e-15	1.92178e-12	2.97762e-19	1.45903e-17	[-1]	Group50	27.1186	16	[ABI1, ACTB, ARPC1B, ARPC4, ARPC5, BTK, CDC42, CYFIP1, FGR, GRB2, HCK, LYN, NCK1, SYK, WASF2, WIPF1]
R-HSA:9716542	Signaling by Rho GTPases, Miro GTPases and RHOBTB3	REACTOME_Pathways_18.08.2022	1.25207e-15	8.51405e-13	2.97762e-19	1.45903e-17	[-1]	Group50	6.639	48	[ABI1, ACTB, ACTN1, ARAP3, ARHGAP12, ARHGAP17, ARHGAP29, ARHGAP4, ARHGAP45, ARHGDIA, ARHGDIG, ARHGEF15, ARPC1B, ARPC4, ARPC5, BTK, CDC42, CFL1, CKB, CYBA, CYFIP1, DEF6, DOCK10, ERBIN, FGD4, FMNL1, FNBP1L, GRB2, HSP90AB1, MRTFA, MSI2, NCF1, NCK1, NET1, NUP160, PIK3R3, PLXNB1, PRKCB, RAC2, RHOG, SRGAP2, TAGAP, TIAM1, TMEM59, TPM3, WASF2, WIPF1, YWHAG]
GO:0044089	positive regulation of cellular component biogenesis	GO_BiologicalProcess-EBI-UniProt-GOA-ACAP-ARAP_05.04.2022_00h00	6.50822e-06	0.00356	2.97762e-19	1.45903e-17	[3, 4, 5]	Group50	4.74383	25	[ARHGEF15, BIK, BIN1, CCL19, CDC42, CNOT6, CYFIP1, DAB2IP, FES, FNBP1L, GRB2, HCK, HSPA1A, LCP1, NAV3, NCK1, PLEK, PTPRJ, RAC2, RAP1B, SEMA4A, SYK, TLR6, TPM1, WASF2]
GO:0051130	positive regulation of cellular component organization	GO_BiologicalProcess-EBI-UniProt-GOA-ACAP-ARAP_05.04.2022_00h00	3.01608e-08	1.91521e-05	2.97762e-19	1.45903e-17	[3, 4, 5]	Group50	4.19708	46	[ADRB2, ARHGEF15, BIK, BIN1, CAMK1, CCL19, CD53, CDC42, CNOT6, CXCL9, CYFIP1, DAB2IP, DBNL, FES, FNBP1L, GPX1, GRB2, GRN, HCK, HCLS1, HSPA1A, IQSEC1, LCP1, LYN, NAV3, NCK1, PLEK, PLXNA3, PLXNB1, PLXNC1, PPP1R15A, PTPRJ, RAB8B, RAC2, RAP1B, RAPGEF2, RGS2, SEMA4A, SEMA7A, SETX, SKIL, SYK, TIAM1, TLR6, TPM1, WASF2]
GO:0030036	actin cytoskeleton organization	GO_BiologicalProcess-EBI-UniProt-GOA-ACAP-ARAP_05.04.2022_00h00	9.68536e-17	6.62479e-14	2.97762e-19	1.45903e-17	[3, 6]	Group50	6.70171	51	[ABI1, ACTB, ACTN1, AIF1L, ARHGAP12, ARHGAP17, ARHGDIA, ARHGEF15, ARPC1B, ARPC4, ARPC5, BCL6, BIN1, CAPZA1, CDC42, CFL1, CNN3, CYFIP1, CYRIB, DBNL, EHBP1L1, FES, FGD4, FMNL1, GAB1, GRB2, HCK, HCLS1, IQSEC1, LCP1, MARCKSL1, MICAL3, MRAS, MRTFA, MYCBP2, MYO18A, MYO1F, NCK1, PLEK, RAC2, RHOG, S1PR1, SH3KBP1, SIGLEC15, SLC9A3R1, SPECC1, SSH3, TPM1, TPM3, WASF2, WIPF1]
GO:1902903	regulation of supramolecular fiber organization	GO_BiologicalProcess-EBI-UniProt-GOA-ACAP-ARAP_05.04.2022_00h00	6.52692e-07	0.000395531	2.97762e-19	1.45903e-17	[4, 5]	Group50	5.73566	23	[ARHGEF15, ARPC1B, ARPC4, ARPC5, BIN1, CAPZA1, CDC42, CYFIP1, CYRIB, DBNL, FES, GPX1, GRB2, HCK, HCLS1, HSPA1A, NAV3, NCK1, PLEK, S1PR1, SSH3, TPM1, WASF2]
GO:0007010	cytoskeleton organization	GO_BiologicalProcess-EBI-UniProt-GOA-ACAP-ARAP_05.04.2022_00h00	2.54078e-11	1.67437e-08	2.97762e-19	1.45903e-17	[5]	Group50	4.16667	66	[ABI1, ACTB, ACTN1, AIF1L, ANK2, ARAP3, ARHGAP12, ARHGAP17, ARHGAP4, ARHGDIA, ARHGEF15, ARPC1B, ARPC4, ARPC5, BCL2L10, BCL6, BIN1, CAPZA1, CDC42, CFL1, CNN3, CYFIP1, CYRIB, DBNL, EHBP1L1, ERBIN, FES, FGD4, FMNL1, GAB1, GABARAP, GNAI1, GRB2, HCK, HCLS1, HEPACAM2, HSPA1A, IQSEC1, KRT18, LCP1, MARCKSL1, MICAL3, MRAS, MRTFA, MYCBP2, MYO18A, MYO1F, NAV3, NCK1, PLEK, PLXNA3, PLXNB1, RAC2, RHOG, S1PR1, …
GO:0043254	regulation of protein-containing complex assembly	GO_BiologicalProcess-EBI-UniProt-GOA-ACAP-ARAP_05.04.2022_00h00	7.74537e-07	0.000467046	2.97762e-19	1.45903e-17	[4, 5, 6]	Group50	5.50459	24	[ARPC1B, ARPC4, ARPC5, BIK, BIN1, CAPZA1, CDC42, CYFIP1, CYRIB, DAB2IP, DBNL, FES, GRB2, HCK, HCLS1, HSPA1A, LCP1, NAV3, NCK1, PLEK, RAP1B, SSH3, SYK, TLR6]
GO:1902905	positive regulation of supramolecular fiber organization	GO_BiologicalProcess-EBI-UniProt-GOA-ACAP-ARAP_05.04.2022_00h00	3.94596e-06	0.00220579	2.97762e-19	1.45903e-17	[4, 5, 6]	Group50	7.69231	14	[ARHGEF15, BIN1, CDC42, CYFIP1, FES, GPX1, GRB2, HCK, HSPA1A, NAV3, NCK1, PLEK, TPM1, WASF2]
GO:0007015	actin filament organization	GO_BiologicalProcess-EBI-UniProt-GOA-ACAP-ARAP_05.04.2022_00h00	3.7732e-12	2.50163e-09	2.97762e-19	1.45903e-17	[4, 5, 7]	Group50	7.11297	34	[ABI1, ACTN1, AIF1L, ARHGAP12, ARHGAP17, ARHGEF15, ARPC1B, ARPC4, ARPC5, BIN1, CAPZA1, CDC42, CFL1, CYFIP1, CYRIB, DBNL, GRB2, HCK, HCLS1, LCP1, MARCKSL1, MICAL3, MYO1F, NCK1, PLEK, RAC2, RHOG, S1PR1, SH3KBP1, SSH3, TPM1, TPM3, WASF2, WIPF1]
GO:0002861	regulation of inflammatory response to antigenic stimulus	GO_BiologicalProcess-EBI-UniProt-GOA-ACAP-ARAP_05.04.2022_00h00	8.66818e-06	0.00464614	2.97762e-19	1.45903e-17	[4, 5, 6, 7]	Group50	16.2791	7	[BTK, FGR, GPX1, HCK, IL12B, LYN, SYK]
GO:0031334	positive regulation of protein-containing complex assembly	GO_BiologicalProcess-EBI-UniProt-GOA-ACAP-ARAP_05.04.2022_00h00	1.72491e-05	0.00893503	2.97762e-19	1.45903e-17	[4, 5, 6, 7]	Group50	6.76329	14	[BIK, BIN1, DAB2IP, FES, GRB2, HCK, HSPA1A, LCP1, NAV3, NCK1, PLEK, RAP1B, SYK, TLR6]
GO:0032956	regulation of actin cytoskeleton organization	GO_BiologicalProcess-EBI-UniProt-GOA-ACAP-ARAP_05.04.2022_00h00	3.70909e-09	2.40349e-06	2.97762e-19	1.45903e-17	[4, 5, 6, 7]	Group50	6.80628	26	[ARHGAP17, ARHGDIA, ARHGEF15, ARPC1B, ARPC4, ARPC5, BIN1, CAPZA1, CDC42, CYFIP1, CYRIB, DBNL, FES, GRB2, HCK, HCLS1, MYCBP2, NCK1, PLEK, RAC2, RHOG, S1PR1, SIGLEC15, SSH3, TPM1, WASF2]
GO:0051493	regulation of cytoskeleton organization	GO_BiologicalProcess-EBI-UniProt-GOA-ACAP-ARAP_05.04.2022_00h00	2.24249e-08	1.43295e-05	2.97762e-19	1.45903e-17	[5, 6]	Group50	5.44815	31	[ARHGAP17, ARHGDIA, ARHGEF15, ARPC1B, ARPC4, ARPC5, BIN1, CAPZA1, CDC42, CYFIP1, CYRIB, DBNL, FES, GNAI1, GRB2, HCK, HCLS1, HSPA1A, MYCBP2, NAV3, NCK1, PLEK, PLXNA3, PLXNB1, RAC2, RHOG, S1PR1, SIGLEC15, SSH3, TPM1, WASF2]
GO:0032271	regulation of protein polymerization	GO_BiologicalProcess-EBI-UniProt-GOA-ACAP-ARAP_05.04.2022_00h00	9.74383e-07	0.000578783	2.97762e-19	1.45903e-17	[5, 6, 7]	Group50	7.58294	16	[ARPC1B, ARPC4, ARPC5, BIN1, CAPZA1, CYFIP1, CYRIB, DBNL, FES, GRB2, HCK, HCLS1, HSPA1A, NAV3, NCK1, SSH3]
GO:0051258	protein polymerization	GO_BiologicalProcess-EBI-UniProt-GOA-ACAP-ARAP_05.04.2022_00h00	6.59352e-05	0.0312533	2.97762e-19	1.45903e-17	[6]	Group50	5.42373	16	[ARPC1B, ARPC4, ARPC5, BIN1, CAPZA1, CYFIP1, CYRIB, DBNL, FES, GRB2, HCK, HCLS1, HSPA1A, NAV3, NCK1, SSH3]
GO:0051495	positive regulation of cytoskeleton organization	GO_BiologicalProcess-EBI-UniProt-GOA-ACAP-ARAP_05.04.2022_00h00	2.76507e-06	0.00156779	2.97762e-19	1.45903e-17	[5, 6, 7]	Group50	7.42574	15	[ARHGEF15, BIN1, CDC42, CYFIP1, FES, GRB2, HCK, HCLS1, HSPA1A, NAV3, NCK1, PLEK, PLXNA3, TPM1, WASF2]
GO:0097581	lamellipodium organization	GO_BiologicalProcess-EBI-UniProt-GOA-ACAP-ARAP_05.04.2022_00h00	6.80651e-06	0.00370274	2.97762e-19	1.45903e-17	[6]	Group50	10.4167	10	[ABI1, ARPC5, CDC42, CYFIP1, FGD4, NCK1, RAC2, S1PR1, SRGAP2, WASF2]
GO:0008154	actin polymerization or depolymerization	GO_BiologicalProcess-EBI-UniProt-GOA-ACAP-ARAP_05.04.2022_00h00	2.72086e-08	1.73047e-05	2.97762e-19	1.45903e-17	[5, 6, 8]	Group50	8.65385	18	[ABI1, ARPC1B, ARPC4, ARPC5, BIN1, CAPZA1, CFL1, CYFIP1, CYRIB, DBNL, GRB2, HCK, HCLS1, MICAL3, NCK1, PLEK, SSH3, WIPF1]
GO:0030832	regulation of actin filament length	GO_BiologicalProcess-EBI-UniProt-GOA-ACAP-ARAP_05.04.2022_00h00	1.23506e-06	0.00072498	2.97762e-19	1.45903e-17	[5, 6, 7, 8]	Group50	8.48485	14	[ARPC1B, ARPC4, ARPC5, BIN1, CAPZA1, CYFIP1, CYRIB, DBNL, GRB2, HCK, HCLS1, NCK1, PLEK, SSH3]
GO:0110053	regulation of actin filament organization	GO_BiologicalProcess-EBI-UniProt-GOA-ACAP-ARAP_05.04.2022_00h00	9.31423e-07	0.000555128	2.97762e-19	1.45903e-17	[5, 6, 7, 8]	Group50	6.52921	19	[ARHGEF15, ARPC1B, ARPC4, ARPC5, BIN1, CAPZA1, CDC42, CYFIP1, CYRIB, DBNL, GRB2, HCK, HCLS1, NCK1, PLEK, S1PR1, SSH3, TPM1, WASF2]
GO:0030032	lamellipodium assembly	GO_BiologicalProcess-EBI-UniProt-GOA-ACAP-ARAP_05.04.2022_00h00	5.82466e-05	0.0279001	2.97762e-19	1.45903e-17	[7]	Group50	10.3896	8	[CDC42, CYFIP1, FGD4, NCK1, RAC2, S1PR1, SRGAP2, WASF2]
GO:0030041	actin filament polymerization	GO_BiologicalProcess-EBI-UniProt-GOA-ACAP-ARAP_05.04.2022_00h00	1.35394e-05	0.00706756	2.97762e-19	1.45903e-17	[6, 7, 9]	Group50	7.38636	13	[ARPC1B, ARPC4, ARPC5, BIN1, CAPZA1, CYFIP1, CYRIB, DBNL, GRB2, HCK, HCLS1, NCK1, SSH3]
GO:0008064	regulation of actin polymerization or depolymerization	GO_BiologicalProcess-EBI-UniProt-GOA-ACAP-ARAP_05.04.2022_00h00	1.14808e-06	0.000677364	2.97762e-19	1.45903e-17	[6, 7, 8, 9]	Group50	8.53659	14	[ARPC1B, ARPC4, ARPC5, BIN1, CAPZA1, CYFIP1, CYRIB, DBNL, GRB2, HCK, HCLS1, NCK1, PLEK, SSH3]
GO:0030833	regulation of actin filament polymerization	GO_BiologicalProcess-EBI-UniProt-GOA-ACAP-ARAP_05.04.2022_00h00	1.47889e-06	0.000857755	2.97762e-19	1.45903e-17	[6, 7, 8, 9, 10]	Group50	9.02778	13	[ARPC1B, ARPC4, ARPC5, BIN1, CAPZA1, CYFIP1, CYRIB, DBNL, GRB2, HCK, HCLS1, NCK1, SSH3]
R-HSA:114604	GPVI-mediated activation cascade	REACTOME_Pathways_18.08.2022	1.22996e-07	7.69954e-05	1.60267e-21	8.17361e-20	[-1]	Group51	22.8571	8	[CDC42, FCER1G, LYN, PIK3R3, PTPN6, RAC2, RHOG, SYK]
R-HSA:1280218	Adaptive Immune System	REACTOME_Pathways_18.08.2022	7.52809e-09	4.84809e-06	1.60267e-21	8.17361e-20	[-1]	Group51	4.94148	38	[AKT3, BLNK, BTK, CAPZA1, CBLB, CD209, CD74, CDC42, CTSK, CTSS, CYBA, DAPP1, FYB1, GRB2, HCST, HLA-A, HLA-DOB, HUWE1, LYN, MYLIP, NCF1, NCK1, PIK3AP1, PIK3CD, PIK3R3, PRKCB, PTPN6, PTPRC, PTPRJ, RAP1B, RAP1GAP2, SH3KBP1, SOCS1, SOCS3, SYK, TLR6, UBB, UBE2E2]
R-HSA:1433557	Signaling by SCF-KIT	REACTOME_Pathways_18.08.2022	9.5317e-05	0.0437505	1.60267e-21	8.17361e-20	[-1]	Group51	13.9535	6	[FES, GRB2, LYN, PIK3R3, PTPN6, SOCS1]
R-HSA:2029481	FCGR activation	REACTOME_Pathways_18.08.2022	4.03243e-05	0.0197186	1.60267e-21	8.17361e-20	[-1]	Group51	33.3333	4	[FGR, HCK, LYN, SYK]
R-HSA:2871796	FCERI mediated MAPK activation	REACTOME_Pathways_18.08.2022	1.66477e-05	0.00867344	1.60267e-21	8.17361e-20	[-1]	Group51	18.75	6	[FCER1G, FOS, GRB2, JUN, LYN, SYK]
R-HSA:449147	Signaling by Interleukins	REACTOME_Pathways_18.08.2022	5.6956e-13	3.79896e-10	1.60267e-21	8.17361e-20	[-1]	Group51	7.39958	35	[BCL6, BLNK, CAPZA1, CCL19, CCND1, CDC42, CFL1, CNTFR, DUSP6, FOS, GRB2, HCK, IL12B, IL21, IL2RB, IL31RA, IRAK3, JUN, JUNB, LCP1, LYN, MCL1, PIK3CD, PIK3R3, PIM1, PTPN18, PTPN6, RAP1B, S1PR1, SOCS1, SOCS3, SYK, TIFA, TNFRSF1A, UBB]
R-HSA:451927	Interleukin-2 family signaling	REACTOME_Pathways_18.08.2022	1.01552e-05	0.00541274	1.60267e-21	8.17361e-20	[-1]	Group51	15.9091	7	[GRB2, IL21, IL2RB, PIK3CD, PIK3R3, PTPN6, SYK]
R-HSA:512988	Interleukin-3, Interleukin-5 and GM-CSF signaling	REACTOME_Pathways_18.08.2022	8.26837e-09	5.31656e-06	1.60267e-21	8.17361e-20	[-1]	Group51	20.8333	10	[BLNK, GRB2, HCK, IL2RB, LYN, PIK3CD, PIK3R3, PTPN6, SYK, UBB]
R-HSA:76002	Platelet activation, signaling and aggregation	REACTOME_Pathways_18.08.2022	9.19033e-07	0.000548663	1.60267e-21	8.17361e-20	[-1]	Group51	6.84411	18	[ACTN1, CDC42, CFL1, CYRIB, FCER1G, GNAI1, GNG2, GRB2, LYN, PIK3R3, PLEK, PRKCB, PSAP, PTPN6, RAC2, RAP1B, RHOG, SYK]
R-HSA:912526	Interleukin receptor SHC signaling	REACTOME_Pathways_18.08.2022	9.23234e-05	0.0425611	1.60267e-21	8.17361e-20	[-1]	Group51	18.5185	5	[GRB2, IL2RB, PIK3CD, PIK3R3, PTPN6]
R-HSA:912631	Regulation of signaling by CBL	REACTOME_Pathways_18.08.2022	2.03614e-09	1.32349e-06	1.60267e-21	8.17361e-20	[-1]	Group51	36.3636	8	[BLNK, GRB2, HCK, LYN, PIK3CD, PIK3R3, SYK, UBB]
R-HSA:9607240	FLT3 Signaling	REACTOME_Pathways_18.08.2022	3.6583e-06	0.00205962	1.60267e-21	8.17361e-20	[-1]	Group51	18.4211	7	[AKT3, FLT3, GRB2, HCK, PTPRJ, SYK, UBB]
R-HSA:9664407	Parasite infection	REACTOME_Pathways_18.08.2022	2.83031e-15	1.92178e-12	1.60267e-21	8.17361e-20	[-1]	Group51	27.1186	16	[ABI1, ACTB, ARPC1B, ARPC4, ARPC5, BTK, CDC42, CYFIP1, FGR, GRB2, HCK, LYN, NCK1, SYK, WASF2, WIPF1]
R-HSA:9664417	Leishmania phagocytosis	REACTOME_Pathways_18.08.2022	2.83031e-15	1.92178e-12	1.60267e-21	8.17361e-20	[-1]	Group51	27.1186	16	[ABI1, ACTB, ARPC1B, ARPC4, ARPC5, BTK, CDC42, CYFIP1, FGR, GRB2, HCK, LYN, NCK1, SYK, WASF2, WIPF1]
R-HSA:9664422	FCGR3A-mediated phagocytosis	REACTOME_Pathways_18.08.2022	2.83031e-15	1.92178e-12	1.60267e-21	8.17361e-20	[-1]	Group51	27.1186	16	[ABI1, ACTB, ARPC1B, ARPC4, ARPC5, BTK, CDC42, CYFIP1, FGR, GRB2, HCK, LYN, NCK1, SYK, WASF2, WIPF1]
R-HSA:9674555	Signaling by CSF3 (G-CSF)	REACTOME_Pathways_18.08.2022	6.65213e-07	0.000402454	1.60267e-21	8.17361e-20	[-1]	Group51	23.3333	7	[GRB2, HCK, LYN, SOCS1, SOCS3, SYK, UBB]
R-HSA:9705462	Inactivation of CSF3 (G-CSF) signaling	REACTOME_Pathways_18.08.2022	3.60612e-06	0.00203385	1.60267e-21	8.17361e-20	[-1]	Group51	24	6	[HCK, LYN, SOCS1, SOCS3, SYK, UBB]
R-HSA:9706374	FLT3 signaling through SRC family kinases	REACTOME_Pathways_18.08.2022	0.000101248	0.0461693	1.60267e-21	8.17361e-20	[-1]	Group51	50	3	[FLT3, HCK, SYK]
R-HSA:983695	Antigen activates B Cell Receptor (BCR) leading to generation of second messengers	REACTOME_Pathways_18.08.2022	3.58107e-12	2.37783e-09	1.60267e-21	8.17361e-20	[-1]	Group51	34.375	11	[BLNK, BTK, DAPP1, GRB2, LYN, NCK1, PIK3AP1, PIK3CD, PTPN6, SH3KBP1, SYK]
R-HSA:983705	Signaling by the B Cell Receptor (BCR)	REACTOME_Pathways_18.08.2022	7.86833e-08	4.96491e-05	1.60267e-21	8.17361e-20	[-1]	Group51	11.6071	13	[BLNK, BTK, DAPP1, GRB2, LYN, NCK1, PIK3AP1, PIK3CD, PRKCB, PTPN6, SH3KBP1, SYK, UBB]
GO:0001816	cytokine production	GO_BiologicalProcess-EBI-UniProt-GOA-ACAP-ARAP_05.04.2022_00h00	4.30089e-07	0.000262785	1.60267e-21	8.17361e-20	[2, 5]	Group51	4.43038	35	[AFAP1L2, ATF4, ATP2B1, BCL6, BTK, CADM1, CCL19, CD74, CMKLR1, CYBA, CYRIB, ERBIN, FCER1G, FGR, HLA-A, HSP90AB1, HSPA1A, HSPB1, IL12B, IL21, IRAK3, IRF8, LCP1, LYN, NAV3, PIK3CD, PTPN6, PTPRC, PTPRJ, SEMA7A, SOCS1, SYK, TLR6, TLR8, TNFRSF21]
GO:0002262	myeloid cell homeostasis	GO_BiologicalProcess-EBI-UniProt-GOA-ACAP-ARAP_05.04.2022_00h00	5.68707e-05	0.0274117	1.60267e-21	8.17361e-20	[2, 5]	Group51	6.89655	12	[BCL6, BSG, CDK6, HCLS1, HSPA1A, ID2, IKZF1, LYN, PIK3CD, SLC15A4, SPI1, ZFP36L1]
GO:0002520	immune system development	GO_BiologicalProcess-EBI-UniProt-GOA-ACAP-ARAP_05.04.2022_00h00	6.79809e-15	4.6091e-12	1.60267e-21	8.17361e-20	[2, 4, 5]	Group51	5.44601	58	[ABI1, ACTB, ACTN1, ATF4, BATF3, BCL6, BLNK, BTK, CBLB, CCL19, CD74, CDC42, CDK6, CMTM7, CNOT6, DOCK10, FCER1G, FES, FLT3, FOS, HCLS1, HSPA1A, ID2, IKZF1, IL12B, IL21, IL31RA, IRAK3, IRF2BP2, IRF8, JUN, JUNB, KLF6, LYN, MFNG, MKNK2, PIK3CD, PIK3R3, PIM1, PLEK, PTPN6, PTPRC, PTPRJ, RBM47, SEMA4A, SIGLEC15, SLC15A4, SOCS1, SPI1, SSBP3, SYK, TCIM, TIPARP, TMEM178A, TNFRSF11B, WASF2, ZFP36L1, ZNF385A]
GO:0002437	inflammatory response to antigenic stimulus	GO_BiologicalProcess-EBI-UniProt-GOA-ACAP-ARAP_05.04.2022_00h00	5.82466e-05	0.0279001	1.60267e-21	8.17361e-20	[3, 5]	Group51	10.3896	8	[BTK, FGR, GPX1, HCK, IL12B, IL31RA, LYN, SYK]
GO:0002694	regulation of leukocyte activation	GO_BiologicalProcess-EBI-UniProt-GOA-ACAP-ARAP_05.04.2022_00h00	2.11914e-07	0.000131387	1.60267e-21	8.17361e-20	[3, 4, 5]	Group51	4.73458	33	[ACTB, BCL6, BTK, CBLB, CCL19, CD209, CD74, CYRIB, FES, FGR, GRN, HLA-A, HLA-DOB, HSPH1, ID2, IL12B, IL21, IL31RA, JUNB, LYN, MYO18A, NCK1, PTPN6, PTPRC, RAC2, SH3KBP1, SLC15A4, SOCS1, SPI1, SYK, TLR6, TNFRSF21, ZFP36L1]
GO:0002699	positive regulation of immune effector process	GO_BiologicalProcess-EBI-UniProt-GOA-ACAP-ARAP_05.04.2022_00h00	2.81206e-07	0.000173504	1.60267e-21	8.17361e-20	[3, 4, 5]	Group51	7.0632	19	[BTK, CADM1, CCL19, CD74, CYRIB, FES, FGR, HLA-A, IL12B, IL21, LYN, MYO18A, PTPN6, PTPRC, PTPRJ, RAC2, SEMA7A, SPI1, SYK]
GO:0002764	immune response-regulating signaling pathway	GO_BiologicalProcess-EBI-UniProt-GOA-ACAP-ARAP_05.04.2022_00h00	6.38583e-09	4.11886e-06	1.60267e-21	8.17361e-20	[3, 4, 5]	Group51	5.75139	31	[BLNK, BTK, CBLB, CMKLR1, CTSS, CYBA, DAB2IP, ERBIN, FCER1G, FGR, FYB1, HCK, HLA-A, HSPA1A, IRAK3, LYN, NCOR2, PIK3AP1, PIK3CD, PRKCB, PTPN6, PTPRC, PTPRJ, SLC15A4, SYK, TIFA, TLR6, TLR8, TNFRSF21, TNIP3, UNC93B1]
GO:0008284	positive regulation of cell population proliferation	GO_BiologicalProcess-EBI-UniProt-GOA-ACAP-ARAP_05.04.2022_00h00	1.01926e-06	0.000603404	1.60267e-21	8.17361e-20	[3, 4, 5]	Group51	4.0282	40	[ACTB, AKT3, ATF3, BCL6, CAPNS1, CCL19, CCND1, CD209, CD74, CDC42, CDK6, CNOT6, CNTFR, CYBA, FLT3, GRN, HCK, HCLS1, HLA-A, ID2, IL12B, IL21, IL31RA, JUN, LYN, MARCKSL1, NCK1, NME1, PIK3CD, PIM1, PTPN6, PTPRC, RAC2, RHOG, S1PR1, SLC35F6, SMOX, SSBP3, SYK, TIAM1]
GO:0031343	positive regulation of cell killing	GO_BiologicalProcess-EBI-UniProt-GOA-ACAP-ARAP_05.04.2022_00h00	1.87694e-05	0.00966623	1.60267e-21	8.17361e-20	[3, 4, 5]	Group51	12.1212	8	[CADM1, CYRIB, HLA-A, IL12B, IL21, PTPRC, SPI1, SYK]
GO:0032103	positive regulation of response to external stimulus	GO_BiologicalProcess-EBI-UniProt-GOA-ACAP-ARAP_05.04.2022_00h00	3.60633e-05	0.0178513	1.60267e-21	8.17361e-20	[3, 4, 5]	Group51	4.61216	22	[BTK, CADM1, CCL19, CD74, CMKLR1, CNOT6, CYBA, GRN, HCK, HSPB1, IL12B, IL21, LCP1, LYN, RAC2, S1PR1, SASH1, SLC15A4, SPI1, SYK, TLR8, TNFRSF1A]
GO:0045597	positive regulation of cell differentiation	GO_BiologicalProcess-EBI-UniProt-GOA-ACAP-ARAP_05.04.2022_00h00	6.24313e-07	0.000378958	1.60267e-21	8.17361e-20	[3, 4, 5]	Group51	4.18502	38	[ACTB, BCL6, BIN1, BTK, CAMK1, CCL19, CD74, CDC42, CMKLR1, CXCL9, CYFIP1, DBNL, FES, FOS, HCLS1, HSP90AB1, HSPA1A, ID2, IL12B, JUNB, LCP1, LYN, PIM1, PLAAT4, PLXNA3, PLXNB1, PLXNC1, PTPRC, RAPGEF2, SEMA7A, SKIL, SMOX, SOCS1, SOCS3, SYK, TIAM1, ZFP36L1, ZNF385A]
GO:0045785	positive regulation of cell adhesion	GO_BiologicalProcess-EBI-UniProt-GOA-ACAP-ARAP_05.04.2022_00h00	6.82659e-05	0.0322898	1.60267e-21	8.17361e-20	[3, 4, 5]	Group51	4.41767	22	[ACTB, BCL6, CCL19, CD209, CD74, CDC42, CDK6, CYRIB, HLA-A, HLA-DOB, HSPH1, IL12B, IL21, LYN, NCK1, PLPP3, PTPN6, PTPRC, PTPRJ, SOCS1, SYK, TPM1]
GO:0050777	negative regulation of immune response	GO_BiologicalProcess-EBI-UniProt-GOA-ACAP-ARAP_05.04.2022_00h00	1.82622e-05	0.00944155	1.60267e-21	8.17361e-20	[3, 4, 5]	Group51	7.18232	13	[BCL6, FGR, GPX1, GRN, HCK, HLA-A, IL12B, IRAK3, LYN, PTPN6, PTPRC, SPI1, SYK]
GO:0050778	positive regulation of immune response	GO_BiologicalProcess-EBI-UniProt-GOA-ACAP-ARAP_05.04.2022_00h00	3.93765e-05	0.0193732	1.60267e-21	8.17361e-20	[3, 4, 5]	Group51	4.14747	27	[BLNK, BTK, CADM1, CBLB, CCL19, CD74, CMKLR1, CYRIB, FCER1G, FGR, FYB1, HCK, HLA-A, IL12B, IL21, LYN, NCOR2, PIK3CD, PRKCB, PTPN6, PTPRC, PTPRJ, SLC15A4, SPI1, SYK, TLR8, TNFRSF21]
GO:0050866	negative regulation of cell activation	GO_BiologicalProcess-EBI-UniProt-GOA-ACAP-ARAP_05.04.2022_00h00	3.74982e-05	0.0185241	1.60267e-21	8.17361e-20	[3, 4, 5]	Group51	6.30631	14	[BCL6, BTK, CBLB, CD74, FGR, GRN, ID2, IL31RA, LYN, PTPN6, PTPRC, SOCS1, SPI1, TNFRSF21]
GO:0050867	positive regulation of cell activation	GO_BiologicalProcess-EBI-UniProt-GOA-ACAP-ARAP_05.04.2022_00h00	5.71345e-05	0.0274817	1.60267e-21	8.17361e-20	[3, 4, 5]	Group51	4.47154	22	[ACTB, BCL6, BTK, CCL19, CD209, CD74, CYRIB, FGR, HLA-A, HLA-DOB, HSPH1, IL12B, IL21, LYN, NCK1, PLEK, PTPN6, PTPRC, SH3KBP1, SOCS1, SYK, TLR6]
GO:0001817	regulation of cytokine production	GO_BiologicalProcess-EBI-UniProt-GOA-ACAP-ARAP_05.04.2022_00h00	3.59687e-07	0.000220488	1.60267e-21	8.17361e-20	[3, 4, 5, 6]	Group51	4.46429	35	[AFAP1L2, ATF4, ATP2B1, BCL6, BTK, CADM1, CCL19, CD74, CMKLR1, CYBA, CYRIB, ERBIN, FCER1G, FGR, HLA-A, HSP90AB1, HSPA1A, HSPB1, IL12B, IL21, IRAK3, IRF8, LCP1, LYN, NAV3, PIK3CD, PTPN6, PTPRC, PTPRJ, SEMA7A, SOCS1, SYK, TLR6, TLR8, TNFRSF21]
GO:0002275	myeloid cell activation involved in immune response	GO_BiologicalProcess-EBI-UniProt-GOA-ACAP-ARAP_05.04.2022_00h00	2.68674e-06	0.00152875	1.60267e-21	8.17361e-20	[4, 5]	Group51	10.2804	11	[BTK, FCER1G, FES, FGR, GRN, LYN, PIK3CD, PTPN6, RAC2, SPI1, SYK]
GO:0002285	lymphocyte activation involved in immune response	GO_BiologicalProcess-EBI-UniProt-GOA-ACAP-ARAP_05.04.2022_00h00	5.61491e-06	0.00309381	1.60267e-21	8.17361e-20	[4, 5]	Group51	7.00935	15	[BCL6, CCL19, CD74, DOCK10, FCER1G, IL12B, IL21, IRF8, JUNB, LCP1, MFNG, PTPRC, SEMA4A, SLC15A4, SPI1]
GO:0002695	negative regulation of leukocyte activation	GO_BiologicalProcess-EBI-UniProt-GOA-ACAP-ARAP_05.04.2022_00h00	1.10485e-05	0.00586673	1.60267e-21	8.17361e-20	[3, 4, 5, 6]	Group51	7.03518	14	[BCL6, BTK, CBLB, CD74, FGR, GRN, ID2, IL31RA, LYN, PTPN6, PTPRC, SOCS1, SPI1, TNFRSF21]
GO:0002696	positive regulation of leukocyte activation	GO_BiologicalProcess-EBI-UniProt-GOA-ACAP-ARAP_05.04.2022_00h00	9.30865e-05	0.0428198	1.60267e-21	8.17361e-20	[3, 4, 5, 6]	Group51	4.43975	21	[ACTB, BCL6, BTK, CCL19, CD209, CD74, CYRIB, FGR, HLA-A, HLA-DOB, HSPH1, IL12B, IL21, LYN, NCK1, PTPN6, PTPRC, SH3KBP1, SOCS1, SYK, TLR6]
GO:0002703	regulation of leukocyte mediated immunity	GO_BiologicalProcess-EBI-UniProt-GOA-ACAP-ARAP_05.04.2022_00h00	6.77953e-06	0.00369485	1.60267e-21	8.17361e-20	[4, 5]	Group51	6.53061	16	[BCL6, BTK, CADM1, CYRIB, FES, FGR, HLA-A, IL12B, IL21, LYN, PTPN6, PTPRC, RAC2, SLC15A4, SPI1, SYK]
GO:0042110	T cell activation	GO_BiologicalProcess-EBI-UniProt-GOA-ACAP-ARAP_05.04.2022_00h00	2.33457e-08	1.48712e-05	1.60267e-21	8.17361e-20	[4, 5]	Group51	5.4386	31	[ACTB, BCL6, CADM1, CBLB, CCL19, CD209, CD74, CDK6, CYRIB, FCER1G, HLA-A, HLA-DOB, HSPH1, IL12B, IL21, JUNB, LCP1, LYN, NCK1, NCOR2, PIK3CD, PIK3R3, PTPN6, PTPRC, RAC2, SEMA4A, SOCS1, SPI1, SYK, TNFRSF21, ZFP36L1]
GO:0042113	B cell activation	GO_BiologicalProcess-EBI-UniProt-GOA-ACAP-ARAP_05.04.2022_00h00	1.79231e-09	1.1668e-06	1.60267e-21	8.17361e-20	[4, 5]	Group51	7.04607	26	[BCL6, BLNK, BTK, CD74, CMTM7, DOCK10, FLT3, ID2, IL21, IRF2BP2, IRF8, KLF6, LYN, MFNG, PIK3CD, PIK3R3, PRKCB, PTPN6, PTPRC, PTPRJ, SH3KBP1, SLC15A4, SPI1, SYK, TNFRSF21, ZFP36L1]
GO:0045576	mast cell activation	GO_BiologicalProcess-EBI-UniProt-GOA-ACAP-ARAP_05.04.2022_00h00	7.66935e-05	0.0360459	1.60267e-21	8.17361e-20	[4, 5]	Group51	10	8	[BTK, FES, FGR, LYN, PIK3CD, PTPN6, RAC2, SYK]
GO:0046651	lymphocyte proliferation	GO_BiologicalProcess-EBI-UniProt-GOA-ACAP-ARAP_05.04.2022_00h00	1.15395e-05	0.00610442	1.60267e-21	8.17361e-20	[4, 5]	Group51	5.71429	18	[BCL6, BTK, CADM1, CBLB, CCL19, CD209, CD74, FLT3, HLA-A, IL12B, IL21, LYN, NCK1, PTPN6, PTPRC, RAC2, SYK, TNFRSF21]
GO:0048534	hematopoietic or lymphoid organ development	GO_BiologicalProcess-EBI-UniProt-GOA-ACAP-ARAP_05.04.2022_00h00	7.21119e-14	4.86755e-11	1.60267e-21	8.17361e-20	[3, 4, 5, 6]	Group51	5.43807	54	[ABI1, ACTB, ACTN1, ATF4, BATF3, BCL6, BLNK, BTK, CCL19, CD74, CDC42, CDK6, CMTM7, DOCK10, FCER1G, FES, FLT3, FOS, HCLS1, HSPA1A, ID2, IKZF1, IL12B, IL21, IL31RA, IRF2BP2, IRF8, JUN, JUNB, KLF6, LYN, MFNG, MKNK2, PIK3CD, PIK3R3, PIM1, PLEK, PTPN6, PTPRC, PTPRJ, RBM47, SEMA4A, SIGLEC15, SOCS1, SPI1, SSBP3, SYK, TCIM, TIPARP, TMEM178A, TNFRSF11B, WASF2, ZFP36L1, ZNF385A]
GO:0070663	regulation of leukocyte proliferation	GO_BiologicalProcess-EBI-UniProt-GOA-ACAP-ARAP_05.04.2022_00h00	2.60225e-05	0.0131674	1.60267e-21	8.17361e-20	[4, 5]	Group51	5.86081	16	[BCL6, BTK, CBLB, CCL19, CD209, CD74, HLA-A, IL12B, IL21, LYN, NCK1, PTPN6, PTPRC, RAC2, SYK, TNFRSF21]
GO:0030595	leukocyte chemotaxis	GO_BiologicalProcess-EBI-UniProt-GOA-ACAP-ARAP_05.04.2022_00h00	5.5556e-05	0.0268335	1.60267e-21	8.17361e-20	[3, 5, 6]	Group51	5.76923	15	[BSG, CCL19, CD74, CH25H, CMKLR1, CXCL9, DUSP1, FCER1G, LYN, PIK3CD, RAC2, S1PR1, SLC12A2, SPI1, SYK]
GO:0001819	positive regulation of cytokine production	GO_BiologicalProcess-EBI-UniProt-GOA-ACAP-ARAP_05.04.2022_00h00	1.21868e-05	0.00642247	1.60267e-21	8.17361e-20	[3, 4, 5, 6, 7]	Group51	4.6875	24	[AFAP1L2, ATF4, CADM1, CCL19, CD74, CYBA, CYRIB, FCER1G, FGR, HLA-A, HSPA1A, HSPB1, IL12B, IL21, IRAK3, IRF8, LCP1, PIK3CD, PTPRC, PTPRJ, SEMA7A, SYK, TLR6, TLR8]
GO:0002757	immune response-activating signal transduction	GO_BiologicalProcess-EBI-UniProt-GOA-ACAP-ARAP_05.04.2022_00h00	3.19715e-05	0.0158579	1.60267e-21	8.17361e-20	[3, 4, 5, 6, 7]	Group51	5.29412	18	[BLNK, BTK, CBLB, CMKLR1, FCER1G, FGR, FYB1, HCK, HLA-A, LYN, NCOR2, PIK3CD, PRKCB, PTPN6, PTPRC, PTPRJ, SYK, TNFRSF21]
GO:0002768	immune response-regulating cell surface receptor signaling pathway	GO_BiologicalProcess-EBI-UniProt-GOA-ACAP-ARAP_05.04.2022_00h00	9.82747e-05	0.0450098	1.60267e-21	8.17361e-20	[4, 5, 6]	Group51	4.85175	18	[BLNK, BTK, CBLB, CMKLR1, FCER1G, FGR, FYB1, HCK, HLA-A, LYN, NCOR2, PIK3CD, PRKCB, PTPN6, PTPRC, PTPRJ, SYK, TNFRSF21]
GO:0007229	integrin-mediated signaling pathway	GO_BiologicalProcess-EBI-UniProt-GOA-ACAP-ARAP_05.04.2022_00h00	8.94465e-05	0.0414137	1.60267e-21	8.17361e-20	[4, 5, 6]	Group51	7.75194	10	[CDC42, ERBIN, FGR, FYB1, HCK, ITGAE, PLEK, PLPP3, SEMA7A, SYK]
GO:0022409	positive regulation of cell-cell adhesion	GO_BiologicalProcess-EBI-UniProt-GOA-ACAP-ARAP_05.04.2022_00h00	1.83169e-05	0.00945152	1.60267e-21	8.17361e-20	[4, 5, 6]	Group51	5.52147	18	[ACTB, BCL6, CCL19, CD209, CD74, CYRIB, HLA-A, HLA-DOB, HSPH1, IL12B, IL21, LYN, NCK1, PLPP3, PTPN6, PTPRC, SOCS1, SYK]
GO:0050764	regulation of phagocytosis	GO_BiologicalProcess-EBI-UniProt-GOA-ACAP-ARAP_05.04.2022_00h00	0.000107408	0.0488706	1.60267e-21	8.17361e-20	[4, 5, 6]	Group51	8.41121	9	[CYBA, FCER1G, FGR, HCK, IL2RB, MYO18A, PTPRC, PTPRJ, SYK]
GO:0051249	regulation of lymphocyte activation	GO_BiologicalProcess-EBI-UniProt-GOA-ACAP-ARAP_05.04.2022_00h00	6.63058e-06	0.0036203	1.60267e-21	8.17361e-20	[4, 5, 6]	Group51	4.52261	27	[ACTB, BCL6, BTK, CBLB, CCL19, CD209, CD74, CYRIB, FGR, HLA-A, HLA-DOB, HSPH1, ID2, IL12B, IL21, JUNB, LYN, NCK1, PTPN6, PTPRC, RAC2, SH3KBP1, SLC15A4, SOCS1, SYK, TNFRSF21, ZFP36L1]
GO:0071345	cellular response to cytokine stimulus	GO_BiologicalProcess-EBI-UniProt-GOA-ACAP-ARAP_05.04.2022_00h00	2.85325e-07	0.00017576	1.60267e-21	8.17361e-20	[5]	Group51	4.36321	37	[BTK, CCL19, CD74, CDC42, CMKLR1, CNOT6, CNTFR, CXCL9, CYBA, DAB2IP, DUSP1, ERBIN, FCER1G, FLT3, HCK, HCLS1, HSP90AB1, HSPA1A, IL12B, IL2RB, IL31RA, IRAK3, IRF8, KRT18, MRAS, PTPN6, PTPRC, PTPRJ, SLC12A2, SOCS1, SOCS3, SPI1, SYK, TNFRSF1A, TNFRSF21, XCR1, ZFP36L1]
GO:0002433	immune response-regulating cell surface receptor signaling pathway involved in phagocytosis	GO_BiologicalProcess-EBI-UniProt-GOA-ACAP-ARAP_05.04.2022_00h00	7.34008e-06	0.00397098	1.60267e-21	8.17361e-20	[3, 5, 6, 7]	Group51	21.4286	6	[FGR, HCK, LYN, PTPRC, PTPRJ, SYK]
GO:0070527	platelet aggregation	GO_BiologicalProcess-EBI-UniProt-GOA-ACAP-ARAP_05.04.2022_00h00	4.81304e-05	0.0234395	1.60267e-21	8.17361e-20	[4, 5, 7]	Group51	10.6667	8	[ACTB, ACTN1, BSG, HSPB1, LYN, PLEK, PTPN6, SYK]
GO:0043299	leukocyte degranulation	GO_BiologicalProcess-EBI-UniProt-GOA-ACAP-ARAP_05.04.2022_00h00	2.50398e-05	0.0127202	1.60267e-21	8.17361e-20	[3, 4, 6, 7, 8]	Group51	10.1124	9	[BTK, FES, FGR, HCK, LYN, PIK3CD, RAC2, SPI1, SYK]
GO:0001912	positive regulation of leukocyte mediated cytotoxicity	GO_BiologicalProcess-EBI-UniProt-GOA-ACAP-ARAP_05.04.2022_00h00	6.46649e-05	0.0307158	1.60267e-21	8.17361e-20	[4, 5, 6, 7]	Group51	12.069	7	[CADM1, CYRIB, HLA-A, IL12B, IL21, PTPRC, SPI1]
GO:0002279	mast cell activation involved in immune response	GO_BiologicalProcess-EBI-UniProt-GOA-ACAP-ARAP_05.04.2022_00h00	1.32431e-05	0.00693936	1.60267e-21	8.17361e-20	[5, 6]	Group51	12.6984	8	[BTK, FES, FGR, LYN, PIK3CD, PTPN6, RAC2, SYK]
GO:0002861	regulation of inflammatory response to antigenic stimulus	GO_BiologicalProcess-EBI-UniProt-GOA-ACAP-ARAP_05.04.2022_00h00	8.66818e-06	0.00464614	1.60267e-21	8.17361e-20	[4, 5, 6, 7]	Group51	16.2791	7	[BTK, FGR, GPX1, HCK, IL12B, LYN, SYK]
GO:0030097	hemopoiesis	GO_BiologicalProcess-EBI-UniProt-GOA-ACAP-ARAP_05.04.2022_00h00	1.17801e-14	7.96338e-12	1.60267e-21	8.17361e-20	[4, 5, 6, 7]	Group51	5.68421	54	[ABI1, ACTB, ACTN1, ATF4, BATF3, BCL6, BLNK, BTK, CCL19, CD74, CDC42, CDK6, CMTM7, DOCK10, FCER1G, FES, FLT3, FOS, HCLS1, HSPA1A, ID2, IKZF1, IL12B, IL21, IL31RA, IRF2BP2, IRF8, JUN, JUNB, KLF6, LYN, MFNG, MKNK2, PIK3CD, PIK3R3, PIM1, PLEK, PTPN6, PTPRC, PTPRJ, RBM47, SEMA4A, SIGLEC15, SOCS1, SPI1, SSBP3, SYK, TCIM, TIPARP, TMEM178A, TNFRSF11B, WASF2, ZFP36L1, ZNF385A]
GO:0032944	regulation of mononuclear cell proliferation	GO_BiologicalProcess-EBI-UniProt-GOA-ACAP-ARAP_05.04.2022_00h00	8.74957e-06	0.00468102	1.60267e-21	8.17361e-20	[5, 6]	Group51	6.4	16	[BCL6, BTK, CBLB, CCL19, CD209, CD74, HLA-A, IL12B, IL21, LYN, NCK1, PTPN6, PTPRC, RAC2, SYK, TNFRSF21]
GO:0033006	regulation of mast cell activation involved in immune response	GO_BiologicalProcess-EBI-UniProt-GOA-ACAP-ARAP_05.04.2022_00h00	2.39924e-05	0.0122121	1.60267e-21	8.17361e-20	[4, 5, 6, 7]	Group51	17.6471	6	[FES, FGR, LYN, PTPN6, RAC2, SYK]
GO:0045088	regulation of innate immune response	GO_BiologicalProcess-EBI-UniProt-GOA-ACAP-ARAP_05.04.2022_00h00	6.43691e-06	0.00352742	1.60267e-21	8.17361e-20	[4, 5, 6, 7]	Group51	6.55738	16	[CADM1, FGR, GRN, HCK, HLA-A, IL12B, IL21, IRAK3, LYN, NCF1, PTPN6, SLC15A4, SOCS1, SPI1, SYK, TLR8]
GO:0046631	alpha-beta T cell activation	GO_BiologicalProcess-EBI-UniProt-GOA-ACAP-ARAP_05.04.2022_00h00	1.19748e-05	0.00632267	1.60267e-21	8.17361e-20	[5, 6]	Group51	7.47126	13	[BCL6, CBLB, CCL19, HLA-A, HSPH1, IL12B, IL21, JUNB, NCOR2, PTPRC, SEMA4A, SOCS1, SYK]
GO:1903037	regulation of leukocyte cell-cell adhesion	GO_BiologicalProcess-EBI-UniProt-GOA-ACAP-ARAP_05.04.2022_00h00	2.93734e-05	0.0146573	1.60267e-21	8.17361e-20	[5, 6]	Group51	5.13514	19	[ACTB, BCL6, CBLB, CCL19, CD209, CD74, CYRIB, HLA-A, HLA-DOB, HSPH1, IL12B, IL21, LYN, NCK1, PTPN6, PTPRC, SOCS1, SYK, TNFRSF21]
GO:1903706	regulation of hemopoiesis	GO_BiologicalProcess-EBI-UniProt-GOA-ACAP-ARAP_05.04.2022_00h00	1.2792e-06	0.000748334	1.60267e-21	8.17361e-20	[3, 4, 5, 6, 7, 8]	Group51	5.51559	23	[ACTB, BCL6, BTK, CCL19, CD74, CDK6, FES, FOS, HCLS1, HSPA1A, ID2, IL12B, JUNB, LYN, PTPN6, PTPRC, SOCS1, SPI1, SYK, TCIM, TMEM178A, TNFRSF11B, ZFP36L1]
GO:0002429	immune response-activating cell surface receptor signaling pathway	GO_BiologicalProcess-EBI-UniProt-GOA-ACAP-ARAP_05.04.2022_00h00	3.19715e-05	0.0158579	1.60267e-21	8.17361e-20	[4, 5, 6, 7, 8]	Group51	5.29412	18	[BLNK, BTK, CBLB, CMKLR1, FCER1G, FGR, FYB1, HCK, HLA-A, LYN, NCOR2, PIK3CD, PRKCB, PTPN6, PTPRC, PTPRJ, SYK, TNFRSF21]
GO:0002521	leukocyte differentiation	GO_BiologicalProcess-EBI-UniProt-GOA-ACAP-ARAP_05.04.2022_00h00	1.0498e-13	7.06515e-11	1.60267e-21	8.17361e-20	[4, 5, 6, 7, 8]	Group51	6.75453	41	[ACTB, BATF3, BCL6, BLNK, BTK, CCL19, CD74, CDC42, CDK6, CMTM7, DOCK10, FCER1G, FES, FLT3, FOS, HCLS1, ID2, IKZF1, IL12B, IL21, IL31RA, IRF2BP2, IRF8, JUN, JUNB, KLF6, LYN, MFNG, PIK3CD, PIK3R3, PTPN6, PTPRC, PTPRJ, SEMA4A, SIGLEC15, SOCS1, SPI1, SYK, TMEM178A, TNFRSF11B, ZFP36L1]
GO:0002862	negative regulation of inflammatory response to antigenic stimulus	GO_BiologicalProcess-EBI-UniProt-GOA-ACAP-ARAP_05.04.2022_00h00	5.85263e-06	0.00321895	1.60267e-21	8.17361e-20	[4, 5, 6, 7, 8]	Group51	22.2222	6	[FGR, GPX1, HCK, IL12B, LYN, SYK]
GO:0030099	myeloid cell differentiation	GO_BiologicalProcess-EBI-UniProt-GOA-ACAP-ARAP_05.04.2022_00h00	7.63858e-11	5.02619e-08	1.60267e-21	8.17361e-20	[4, 5, 6, 7, 8]	Group51	7.109	30	[ABI1, ACTN1, BATF3, BCL6, CCL19, CD74, CDC42, CDK6, FES, FOS, HCLS1, HSPA1A, ID2, IKZF1, IL12B, IL31RA, IRF8, JUN, JUNB, LYN, PIK3CD, PTPN6, SIGLEC15, SOCS1, SPI1, TMEM178A, TNFRSF11B, WASF2, ZFP36L1, ZNF385A]
GO:0038093	Fc receptor signaling pathway	GO_BiologicalProcess-EBI-UniProt-GOA-ACAP-ARAP_05.04.2022_00h00	9.15489e-06	0.00488871	1.60267e-21	8.17361e-20	[5, 6, 7]	Group51	13.3333	8	[BTK, FCER1G, FGR, HCK, LYN, PTPRC, PTPRJ, SYK]
GO:0050670	regulation of lymphocyte proliferation	GO_BiologicalProcess-EBI-UniProt-GOA-ACAP-ARAP_05.04.2022_00h00	6.77953e-06	0.00369485	1.60267e-21	8.17361e-20	[5, 6, 7]	Group51	6.53061	16	[BCL6, BTK, CBLB, CCL19, CD209, CD74, HLA-A, IL12B, IL21, LYN, NCK1, PTPN6, PTPRC, RAC2, SYK, TNFRSF21]
GO:0050863	regulation of T cell activation	GO_BiologicalProcess-EBI-UniProt-GOA-ACAP-ARAP_05.04.2022_00h00	4.26719e-06	0.00237256	1.60267e-21	8.17361e-20	[5, 6, 7]	Group51	5.46875	21	[ACTB, BCL6, CBLB, CCL19, CD209, CD74, CYRIB, HLA-A, HLA-DOB, HSPH1, IL12B, IL21, JUNB, LYN, NCK1, PTPN6, PTPRC, RAC2, SOCS1, SYK, TNFRSF21]
GO:1903039	positive regulation of leukocyte cell-cell adhesion	GO_BiologicalProcess-EBI-UniProt-GOA-ACAP-ARAP_05.04.2022_00h00	7.62177e-06	0.00410813	1.60267e-21	8.17361e-20	[5, 6, 7]	Group51	6.15942	17	[ACTB, BCL6, CCL19, CD209, CD74, CYRIB, HLA-A, HLA-DOB, HSPH1, IL12B, IL21, LYN, NCK1, PTPN6, PTPRC, SOCS1, SYK]
GO:1903708	positive regulation of hemopoiesis	GO_BiologicalProcess-EBI-UniProt-GOA-ACAP-ARAP_05.04.2022_00h00	4.48249e-06	0.00248778	1.60267e-21	8.17361e-20	[3, 4, 5, 6, 7, 8, 9]	Group51	7.6087	14	[ACTB, BCL6, BTK, CCL19, CD74, FES, FOS, HCLS1, ID2, IL12B, PTPRC, SOCS1, SYK, ZFP36L1]
GO:0043303	mast cell degranulation	GO_BiologicalProcess-EBI-UniProt-GOA-ACAP-ARAP_05.04.2022_00h00	8.97292e-05	0.0414549	1.60267e-21	8.17361e-20	[4, 5, 6, 7, 8, 9]	Group51	11.4754	7	[BTK, FES, FGR, LYN, PIK3CD, RAC2, SYK]
GO:0050870	positive regulation of T cell activation	GO_BiologicalProcess-EBI-UniProt-GOA-ACAP-ARAP_05.04.2022_00h00	2.50872e-06	0.00143499	1.60267e-21	8.17361e-20	[5, 6, 7, 8]	Group51	6.69291	17	[ACTB, BCL6, CCL19, CD209, CD74, CYRIB, HLA-A, HLA-DOB, HSPH1, IL12B, IL21, LYN, NCK1, PTPN6, PTPRC, SOCS1, SYK]
GO:1902105	regulation of leukocyte differentiation	GO_BiologicalProcess-EBI-UniProt-GOA-ACAP-ARAP_05.04.2022_00h00	9.07437e-07	0.000542648	1.60267e-21	8.17361e-20	[4, 5, 6, 7, 8, 9]	Group51	6.26959	20	[ACTB, BCL6, BTK, CCL19, CD74, CDK6, FES, FOS, HCLS1, ID2, IL12B, JUNB, LYN, PTPN6, PTPRC, SOCS1, SYK, TMEM178A, TNFRSF11B, ZFP36L1]
GO:0002431	Fc receptor mediated stimulatory signaling pathway	GO_BiologicalProcess-EBI-UniProt-GOA-ACAP-ARAP_05.04.2022_00h00	2.03876e-06	0.00117433	1.60267e-21	8.17361e-20	[5, 6, 7, 8, 9]	Group51	20	7	[FCER1G, FGR, HCK, LYN, PTPRC, PTPRJ, SYK]
GO:0002573	myeloid leukocyte differentiation	GO_BiologicalProcess-EBI-UniProt-GOA-ACAP-ARAP_05.04.2022_00h00	5.91917e-10	3.86522e-07	1.60267e-21	8.17361e-20	[5, 6, 7, 8, 9]	Group51	9.21053	21	[BATF3, CCL19, CD74, CDC42, CDK6, FES, FOS, HCLS1, ID2, IL12B, IL31RA, JUN, JUNB, LYN, PIK3CD, SIGLEC15, SOCS1, SPI1, TMEM178A, TNFRSF11B, ZFP36L1]
GO:0030098	lymphocyte differentiation	GO_BiologicalProcess-EBI-UniProt-GOA-ACAP-ARAP_05.04.2022_00h00	1.01859e-10	6.69213e-08	1.60267e-21	8.17361e-20	[4, 5, 6, 7, 8, 9, 10]	Group51	7.02576	30	[ACTB, BCL6, BLNK, BTK, CCL19, CD74, CDK6, CMTM7, DOCK10, FCER1G, FLT3, ID2, IKZF1, IL12B, IL21, IRF2BP2, IRF8, JUNB, KLF6, MFNG, PIK3CD, PIK3R3, PTPN6, PTPRC, PTPRJ, SEMA4A, SOCS1, SPI1, SYK, ZFP36L1]
GO:0038094	Fc-gamma receptor signaling pathway	GO_BiologicalProcess-EBI-UniProt-GOA-ACAP-ARAP_05.04.2022_00h00	3.6583e-06	0.00205962	1.60267e-21	8.17361e-20	[6, 7, 8]	Group51	18.4211	7	[FCER1G, FGR, HCK, LYN, PTPRC, PTPRJ, SYK]
GO:0042129	regulation of T cell proliferation	GO_BiologicalProcess-EBI-UniProt-GOA-ACAP-ARAP_05.04.2022_00h00	0.000107881	0.048978	1.60267e-21	8.17361e-20	[6, 7, 8]	Group51	6.45161	12	[CBLB, CCL19, CD209, HLA-A, IL12B, IL21, NCK1, PTPN6, PTPRC, RAC2, SYK, TNFRSF21]
GO:0046634	regulation of alpha-beta T cell activation	GO_BiologicalProcess-EBI-UniProt-GOA-ACAP-ARAP_05.04.2022_00h00	2.28246e-05	0.0116406	1.60267e-21	8.17361e-20	[6, 7, 8]	Group51	9.09091	10	[BCL6, CBLB, CCL19, HLA-A, HSPH1, IL12B, JUNB, PTPRC, SOCS1, SYK]
GO:1902107	positive regulation of leukocyte differentiation	GO_BiologicalProcess-EBI-UniProt-GOA-ACAP-ARAP_05.04.2022_00h00	4.48249e-06	0.00248778	1.60267e-21	8.17361e-20	[4, 5, 6, 7, 8, 9, 10]	Group51	7.6087	14	[ACTB, BCL6, BTK, CCL19, CD74, FES, FOS, HCLS1, ID2, IL12B, PTPRC, SOCS1, SYK, ZFP36L1]
GO:1903131	mononuclear cell differentiation	GO_BiologicalProcess-EBI-UniProt-GOA-ACAP-ARAP_05.04.2022_00h00	8.71071e-13	5.80133e-10	1.60267e-21	8.17361e-20	[5, 6, 7, 8, 9]	Group51	7.29167	35	[ACTB, BATF3, BCL6, BLNK, BTK, CCL19, CD74, CDK6, CMTM7, DOCK10, FCER1G, FES, FLT3, ID2, IKZF1, IL12B, IL21, IL31RA, IRF2BP2, IRF8, JUN, JUNB, KLF6, LYN, MFNG, PIK3CD, PIK3R3, PTPN6, PTPRC, PTPRJ, SEMA4A, SOCS1, SPI1, SYK, ZFP36L1]
GO:0038096	Fc-gamma receptor signaling pathway involved in phagocytosis	GO_BiologicalProcess-EBI-UniProt-GOA-ACAP-ARAP_05.04.2022_00h00	7.34008e-06	0.00397098	1.60267e-21	8.17361e-20	[4, 6, 7, 8, 9, 10]	Group51	21.4286	6	[FGR, HCK, LYN, PTPRC, PTPRJ, SYK]
GO:0002761	regulation of myeloid leukocyte differentiation	GO_BiologicalProcess-EBI-UniProt-GOA-ACAP-ARAP_05.04.2022_00h00	1.12759e-05	0.00597625	1.60267e-21	8.17361e-20	[5, 6, 7, 8, 9, 10]	Group51	8.87097	11	[CD74, CDK6, FES, FOS, HCLS1, ID2, IL12B, LYN, TMEM178A, TNFRSF11B, ZFP36L1]
GO:0018212	peptidyl-tyrosine modification	GO_BiologicalProcess-EBI-UniProt-GOA-ACAP-ARAP_05.04.2022_00h00	1.24413e-07	7.7758e-05	1.60267e-21	8.17361e-20	[7, 8]	Group51	5.89623	25	[ABI1, AFAP1L2, BTK, CADM4, CBLB, CD74, CRIM1, FES, FGR, FLT3, HCK, HCLS1, HIPK3, IL12B, IL21, IL31RA, LYN, NCF1, PTPN6, PTPRC, PTPRJ, SOCS1, SOCS3, SYK, TNFRSF1A]
GO:0060369	positive regulation of Fc receptor mediated stimulatory signaling pathway	GO_BiologicalProcess-EBI-UniProt-GOA-ACAP-ARAP_05.04.2022_00h00	0.000101248	0.0461693	1.60267e-21	8.17361e-20	[4, 5, 6, 7, 8, 9, 10, 11]	Group51	50	3	[LYN, PTPRC, PTPRJ]
GO:0002763	positive regulation of myeloid leukocyte differentiation	GO_BiologicalProcess-EBI-UniProt-GOA-ACAP-ARAP_05.04.2022_00h00	6.46649e-05	0.0307158	1.60267e-21	8.17361e-20	[5, 6, 7, 8, 9, 10, 11]	Group51	12.069	7	[CD74, FES, FOS, HCLS1, ID2, IL12B, ZFP36L1]
GO:0018108	peptidyl-tyrosine phosphorylation	GO_BiologicalProcess-EBI-UniProt-GOA-ACAP-ARAP_05.04.2022_00h00	1.08644e-07	6.81201e-05	1.60267e-21	8.17361e-20	[7, 8, 9]	Group51	5.93824	25	[ABI1, AFAP1L2, BTK, CADM4, CBLB, CD74, CRIM1, FES, FGR, FLT3, HCK, HCLS1, HIPK3, IL12B, IL21, IL31RA, LYN, NCF1, PTPN6, PTPRC, PTPRJ, SOCS1, SOCS3, SYK, TNFRSF1A]
GO:0030183	B cell differentiation	GO_BiologicalProcess-EBI-UniProt-GOA-ACAP-ARAP_05.04.2022_00h00	2.27748e-12	1.51452e-09	1.60267e-21	8.17361e-20	[5, 6, 7, 8, 9, 10, 11]	Group51	13.1579	20	[BCL6, BLNK, BTK, CMTM7, DOCK10, FLT3, ID2, IL21, IRF2BP2, IRF8, KLF6, MFNG, PIK3CD, PIK3R3, PTPN6, PTPRC, PTPRJ, SPI1, SYK, ZFP36L1]
GO:0030217	T cell differentiation	GO_BiologicalProcess-EBI-UniProt-GOA-ACAP-ARAP_05.04.2022_00h00	2.77482e-05	0.0139296	1.60267e-21	8.17361e-20	[5, 6, 7, 8, 9, 10, 11]	Group51	5.57377	17	[ACTB, BCL6, CCL19, CD74, CDK6, FCER1G, IL12B, IL21, JUNB, PIK3CD, PIK3R3, PTPRC, SEMA4A, SOCS1, SPI1, SYK, ZFP36L1]
GO:0030224	monocyte differentiation	GO_BiologicalProcess-EBI-UniProt-GOA-ACAP-ARAP_05.04.2022_00h00	3.96873e-05	0.0194864	1.60267e-21	8.17361e-20	[6, 7, 8, 9, 10]	Group51	16.2162	6	[CD74, CDK6, FES, IL31RA, JUN, ZFP36L1]
GO:0045619	regulation of lymphocyte differentiation	GO_BiologicalProcess-EBI-UniProt-GOA-ACAP-ARAP_05.04.2022_00h00	8.14461e-05	0.0380353	1.60267e-21	8.17361e-20	[5, 6, 7, 8, 9, 10, 11]	Group51	6.2201	13	[ACTB, BCL6, BTK, CCL19, CD74, ID2, IL12B, JUNB, PTPN6, PTPRC, SOCS1, SYK, ZFP36L1]
GO:0050730	regulation of peptidyl-tyrosine phosphorylation	GO_BiologicalProcess-EBI-UniProt-GOA-ACAP-ARAP_05.04.2022_00h00	4.9228e-07	0.000300291	1.60267e-21	8.17361e-20	[7, 8, 9, 10]	Group51	6.81004	19	[ABI1, AFAP1L2, CADM4, CBLB, CD74, FLT3, HCLS1, IL12B, IL21, IL31RA, LYN, NCF1, PTPN6, PTPRC, PTPRJ, SOCS1, SOCS3, SYK, TNFRSF1A]
