# Supplementary material for: A single-cell transcriptomic atlas reveals resident dendritic-like cells in the zebrafish brain parenchyma
Source: eLife. 2025 Dec 11;13:RP91427. doi: 10.7554/eLife.91427 (PMC12698085; doi:10.7554/eLife.91427)
Supplement: Supplementary file 5. [file elife-91427-supp5.xlsx]

## Sheet: resultsDEG_DClike vs p2ry12MG
	baseMean	log2FoldChange	lfcSE	stat	pvalue	padj
lgals3bpb	52642.4	-8.13802	0.358276	-22.7144	3.23e-114	4.07e-110
mrc1b	44432.3	-8.48709	0.381978	-22.2188	2.26e-109	1.42e-105
apoeb	54799.4	-9.70596	0.445248	-21.799	2.37e-105	9.97e-102
chl1a	9796.6	14.1483	0.753325	18.7811	1.08e-78	3.4e-75
actn1	6234.06	10.9506	0.585859	18.6915	5.8e-78	1.46e-74
fes	2814.91	8.03847	0.465049	17.2852	6.08e-67	1.28e-63
dgkg	2155.38	11.5106	0.677744	16.9836	1.09e-64	1.95e-61
ccl19a.1	10567.8	12.7302	0.757449	16.8067	2.18e-63	3.44e-60
havcr1	7402.83	-11.6316	0.693152	-16.7808	3.38e-63	4.73e-60
ccl34b.1	15442.1	-6.8784	0.410278	-16.7652	4.38e-63	5.52e-60
crybg1a	5324.41	14.2781	0.865243	16.5018	3.56e-61	4.08e-58
slco2b1	9177.42	-12.2606	0.744345	-16.4717	5.86e-61	6.15e-58
apoc1	49980.1	-8.41376	0.514427	-16.3556	3.97e-60	3.85e-57
gria4b	3868.25	11.2184	0.736591	15.2301	2.23e-52	2.01e-49
sb:cb81	4518.92	-7.61207	0.519075	-14.6647	1.09e-48	9.12e-46
znf366	1834.55	7.22101	0.493079	14.6447	1.46e-48	1.15e-45
afap1l2	1527.41	8.0162	0.5815	13.7854	3.12e-43	2.31e-40
entpd1	3826.84	-9.91952	0.726195	-13.6596	1.77e-42	1.24e-39
slc3a2a	2983	-8.74365	0.650774	-13.4358	3.73e-41	2.48e-38
zmp:0000000936	3656.21	-11.6423	0.894926	-13.0092	1.08e-38	6.84e-36
fgf12a	866.321	10.85	0.834437	13.0027	1.18e-38	7.09e-36
si:dkeyp-94g1.1	976.93	7.43348	0.572484	12.9846	1.5e-38	8.57e-36
sema6e	1556.86	10.0977	0.782338	12.9071	4.1e-38	2.25e-35
trip10a	2116.47	-8.51035	0.663323	-12.8299	1.12e-37	5.86e-35
EML5	942.359	10.965	0.85888	12.7666	2.52e-37	1.27e-34
acsl4b	3868.74	-7.49569	0.587732	-12.7536	2.98e-37	1.44e-34
lgals9l1	9508.54	-9.51082	0.760987	-12.498	7.65e-36	3.57e-33
sh3d19	2740.05	10.8658	0.875924	12.4049	2.46e-35	1.11e-32
zgc:171686	2655.17	14.269	1.15906	12.3109	7.91e-35	3.44e-32
pik3ap1	2798.08	6.12377	0.498083	12.2947	9.67e-35	4.06e-32
tnfsf12	1986.04	-10.0916	0.823624	-12.2527	1.63e-34	6.61e-32
mical3a__2	2518.86	6.95346	0.571391	12.1694	4.53e-34	1.78e-31
abca2	2596.89	5.00286	0.414746	12.0625	1.67e-33	6.37e-31
si:ch211-213a13.2__1	2345.02	7.2067	0.601119	11.9888	4.07e-33	1.51e-30
zmp:0000001139	2040.6	8.63112	0.725345	11.8993	1.19e-32	4.3e-30
lgmn	4231.19	-5.78143	0.489734	-11.8052	3.67e-32	1.28e-29
ltb4r	2128.59	-10.3863	0.883028	-11.7621	6.12e-32	2.08e-29
arhgef15	3229.88	4.87651	0.415315	11.7417	7.79e-32	2.58e-29
cntfr	804.837	8.40996	0.717264	11.7251	9.48e-32	3.06e-29
lgals9l3	2084.62	-10.0422	0.857957	-11.7048	1.2e-31	3.79e-29
pdgfba	3878.17	-7.43264	0.635632	-11.6933	1.38e-31	4.24e-29
siglec15l	10339.5	15.6527	1.35371	11.5627	6.36e-31	1.91e-28
il6r	1324.25	-9.67891	0.838839	-11.5385	8.44e-31	2.47e-28
BX539336.1	1744.78	-11.2602	0.977035	-11.5248	9.89e-31	2.83e-28
syngr3b	898.742	7.02755	0.611502	11.4923	1.44e-30	4.04e-28
asap2b	2061.58	5.21102	0.456684	11.4106	3.7e-30	1.01e-27
CMKLR1 (1 of many)__2	1672.25	11.2994	0.993773	11.3702	5.89e-30	1.58e-27
mtss1lb	871.579	-8.33454	0.735396	-11.3334	8.97e-30	2.35e-27
micall1b.2	908.871	4.88614	0.433519	11.2709	1.83e-29	4.7e-27
csf1ra	18476.3	-7.10806	0.638968	-11.1243	9.56e-29	2.41e-26
stab1	12182.2	-8.03999	0.726831	-11.0617	1.92e-28	4.75e-26
kcnk18	1121.14	13.028	1.17848	11.0549	2.08e-28	5.03e-26
scn4bb	2147.04	-10.7144	0.970147	-11.0441	2.34e-28	5.57e-26
lamb1a	3819.01	-12.4876	1.13173	-11.034	2.62e-28	6.11e-26
si:ch73-281k2.5	694.433	5.8434	0.533431	10.9544	6.33e-28	1.45e-25
frmd4bb	3132.76	10.6831	0.981736	10.8818	1.41e-27	3.17e-25
BX897691.1	2755.73	4.61173	0.427434	10.7894	3.87e-27	8.55e-25
etv4	2372.82	-5.01852	0.466175	-10.7653	5.02e-27	1.09e-24
si:dkey-216e24.9	1549.87	7.47423	0.702842	10.6343	2.06e-26	4.41e-24
setx	5522.92	4.32973	0.408199	10.6069	2.77e-26	5.81e-24
si:dkey-33c9.6	5082.35	4.65553	0.439018	10.6044	2.84e-26	5.87e-24
cebpa	7066.21	-7.23558	0.685667	-10.5526	4.94e-26	1e-23
cd22	1838.78	-10.7581	1.02053	-10.5417	5.55e-26	1.11e-23
c1qc	1613.08	-10.3811	0.988246	-10.5046	8.23e-26	1.62e-23
selenop	1696.85	-5.69242	0.547546	-10.3962	2.58e-25	5e-23
ppfibp1a	1047.85	-9.90062	0.968562	-10.222	1.58e-24	3.02e-22
zeb2a	2919.49	-5.84591	0.57226	-10.2155	1.69e-24	3.18e-22
snx33	2998.92	-5.99803	0.590221	-10.1623	2.92e-24	5.41e-22
rac1a	1685.76	-8.38868	0.828623	-10.1236	4.34e-24	7.93e-22
card9	825.673	-4.79787	0.474948	-10.1019	5.42e-24	9.76e-22
ttn.2	6147.92	9.45852	0.936839	10.0962	5.74e-24	1.02e-21
plxna3	2460.88	8.14934	0.807327	10.0942	5.86e-24	1.03e-21
crim1	3637.42	3.64433	0.361469	10.082	6.64e-24	1.15e-21
ptprja	16394.5	4.89938	0.489344	10.0121	1.35e-23	2.3e-21
atp2a3	3261	3.69037	0.369652	9.98337	1.8e-23	3.03e-21
map4k6	1909.62	6.24265	0.628991	9.92488	3.25e-23	5.38e-21
nfil3-6	3728.58	-5.48167	0.552752	-9.91704	3.51e-23	5.74e-21
slc1a3a	2255.1	-9.90112	1.00538	-9.8481	6.99e-23	1.13e-20
si:ch73-95l15.5	3224.33	8.7288	0.88736	9.83682	7.81e-23	1.25e-20
id2a	1932.27	5.07357	0.517071	9.81213	9.98e-23	1.57e-20
mgst1.2	540.321	-8.07234	0.823251	-9.80543	1.07e-22	1.66e-20
mafbb	2665.06	-5.59357	0.571506	-9.78742	1.28e-22	1.96e-20
kcnh1a__2	1178.02	10.38	1.06792	9.71982	2.48e-22	3.77e-20
eepd1	1421.37	-10.1009	1.04239	-9.69012	3.32e-22	4.98e-20
zgc:101810	499.959	11.8612	1.22672	9.66907	4.08e-22	6.05e-20
neurl1aa	402.947	9.85236	1.02271	9.63361	5.77e-22	8.45e-20
csf1rb	16970.4	-6.13122	0.636582	-9.63147	5.89e-22	8.53e-20
nrxn2a	801.49	9.85868	1.02914	9.57951	9.75e-22	1.4e-19
itgb7	2875.88	3.37163	0.353542	9.53672	1.47e-21	2.09e-19
trim3b	799.158	8.47718	0.891599	9.50783	1.95e-21	2.73e-19
slc30a1a	2190.66	-5.05159	0.531841	-9.49829	2.13e-21	2.95e-19
ehd4	1439.5	-6.79484	0.716129	-9.48828	2.35e-21	3.22e-19
CABZ01044156.1	1178.12	-5.43471	0.573193	-9.48147	2.51e-21	3.4e-19
si:dkey-126g1.7	2254.4	-3.83069	0.404127	-9.47893	2.57e-21	3.44e-19
rgl1	1143.61	-8.68906	0.920398	-9.44054	3.71e-21	4.92e-19
plpp3	1623.16	11.1192	1.18263	9.40216	5.35e-21	7.02e-19
slc2a6	687.135	-8.2254	0.876257	-9.38698	6.17e-21	8.02e-19
fam198b	767.834	-9.90332	1.05633	-9.3752	6.9e-21	8.88e-19
sema4ab	6594.17	3.2638	0.348175	9.37403	6.98e-21	8.89e-19
si:ch73-27e22.6	2439.03	4.93382	0.529139	9.32423	1.12e-20	1.41e-18
CABZ01054965.1	1004.25	-6.06044	0.654442	-9.26047	2.04e-20	2.54e-18
csf3r	5597.05	-7.8606	0.849063	-9.25798	2.08e-20	2.57e-18
mpp1	6827.03	-4.7619	0.51501	-9.24623	2.33e-20	2.85e-18
itgae.1	6410.57	-6.60095	0.717837	-9.1956	3.73e-20	4.52e-18
p2ry12	726.486	-9.75878	1.06531	-9.16054	5.16e-20	6.2e-18
il12rb2l	13256.4	4.58022	0.50486	9.07226	1.17e-19	1.39e-17
stoml3b	697.883	-8.15167	0.902452	-9.03281	1.67e-19	1.97e-17
ctnnd2a	810.441	7.70733	0.857423	8.98895	2.5e-19	2.91e-17
mfsd6b	433.396	7.08762	0.792356	8.945	3.72e-19	4.3e-17
si:dkey-56f14.7	1009.41	-10.5339	1.18216	-8.91071	5.07e-19	5.81e-17
dab2ipa	455.868	6.93035	0.77946	8.89122	6.04e-19	6.86e-17
gnpda1	342.627	-7.39493	0.832445	-8.88338	6.49e-19	7.3e-17
ncam1a	712.734	7.01601	0.796401	8.80964	1.26e-18	1.4e-16
mertka	2733.79	-13.131	1.49412	-8.78843	1.52e-18	1.68e-16
si:ch211-51h4.2	784.048	7.20289	0.820219	8.78166	1.61e-18	1.77e-16
ngfrb	1694.45	-10.956	1.25231	-8.74864	2.16e-18	2.35e-16
mast1a	1568.5	-13.556	1.55159	-8.73683	2.4e-18	2.58e-16
cntn3a.2	490.926	10.4673	1.20088	8.71641	2.87e-18	3.07e-16
si:ch211-74m13.3	3552.4	-6.00202	0.692252	-8.67027	4.31e-18	4.57e-16
crip2	688.792	-8.02952	0.927196	-8.66	4.72e-18	4.95e-16
havcr2	2462.99	-12.8547	1.48556	-8.65311	5.01e-18	5.2e-16
znf804a	483.123	7.23098	0.835708	8.65253	5.04e-18	5.2e-16
sult4a1	1141.01	7.53194	0.87063	8.65114	5.1e-18	5.22e-16
pla2r1	730.946	-10.2528	1.18592	-8.64547	5.36e-18	5.45e-16
mmp14b	2667.9	-5.23489	0.605575	-8.6445	5.4e-18	5.45e-16
kazald3	589.864	6.13153	0.709548	8.64145	5.55e-18	5.55e-16
ccser2a	738.758	7.04775	0.818917	8.60618	7.55e-18	7.5e-16
atp1b1a	4543.99	-3.86034	0.451002	-8.55948	1.13e-17	1.12e-15
si:ch211-119e14.1	432.63	6.33877	0.742289	8.5395	1.35e-17	1.32e-15
dok4	855.449	-7.97075	0.933701	-8.53672	1.38e-17	1.34e-15
rasal3	811.976	7.2263	0.847897	8.52262	1.56e-17	1.5e-15
slc22a21	2345	-5.39543	0.633871	-8.51187	1.71e-17	1.63e-15
CABZ01102038.1	637.106	8.05375	0.948882	8.48762	2.11e-17	2e-15
si:dkey-9c18.3	475.97	7.06186	0.835148	8.45582	2.77e-17	2.61e-15
arhgap15	1363.56	-5.04132	0.59909	-8.41496	3.93e-17	3.67e-15
alox5ap	2174.72	-7.51279	0.893489	-8.40838	4.16e-17	3.84e-15
CMKLR1 (1 of many)__1	437.931	14.1149	1.67878	8.40784	4.18e-17	3.84e-15
abi3a	4039.91	3.30629	0.394008	8.39142	4.8e-17	4.39e-15
myt1b	913.686	5.07281	0.609036	8.32925	8.14e-17	7.38e-15
arhgap27	1875.79	-4.68331	0.565704	-8.27873	1.24e-16	1.12e-14
wipf1a	2625.26	4.52592	0.546915	8.27537	1.28e-16	1.14e-14
arhgap4b	8294.9	3.41988	0.413697	8.26664	1.38e-16	1.22e-14
ctsla	710.424	-7.51677	0.912821	-8.23465	1.8e-16	1.59e-14
mcamb	8484.71	-9.13799	1.11055	-8.22833	1.9e-16	1.66e-14
il4r.2	840.839	-9.06096	1.10269	-8.21718	2.08e-16	1.81e-14
gria3b	1013.7	10.5121	1.28012	8.21183	2.18e-16	1.88e-14
cass4	535.794	-7.05859	0.861213	-8.1961	2.48e-16	2.11e-14
aif1l	3422.94	7.75966	0.946594	8.19745	2.46e-16	2.11e-14
spock3	1039.01	11.9	1.45796	8.16207	3.29e-16	2.79e-14
si:ch211-9d9.8__1	785.691	11.9118	1.46112	8.15249	3.57e-16	3e-14
si:ch73-86n18.1	2496.85	-12.546	1.54075	-8.14277	3.86e-16	3.22e-14
zgc:153184	773.205	-12.6033	1.55483	-8.10592	5.23e-16	4.31e-14
irf4a	1369.07	13.2927	1.63982	8.1062	5.22e-16	4.31e-14
arhgap12b	19228.5	3.00942	0.372636	8.07601	6.69e-16	5.48e-14
prkcba	4050.08	5.35523	0.663573	8.0703	7.01e-16	5.7e-14
si:ch73-380l3.3	746.831	-12.4124	1.54298	-8.04443	8.66e-16	6.99e-14
rbfox1l	869.284	-9.86324	1.22631	-8.04301	8.77e-16	6.99e-14
itgb1b.1	565.368	8.69132	1.08058	8.0432	8.75e-16	6.99e-14
pmaip1	1530.65	-3.79597	0.472188	-8.03912	9.05e-16	7.17e-14
hcst	2395.14	7.77793	0.967807	8.03666	9.23e-16	7.27e-14
ctsz	1397.54	-4.22927	0.526998	-8.0252	1.01e-15	7.93e-14
si:dkey-222f2.7	637.772	-12.4744	1.5592	-8.00052	1.24e-15	9.64e-14
sntb1	345.948	13.7748	1.72778	7.97256	1.55e-15	1.2e-13
si:dkey-240h12.4	502.887	4.99282	0.628211	7.94768	1.9e-15	1.46e-13
si:dkey-102c8.3	955.755	5.23637	0.659652	7.93808	2.05e-15	1.57e-13
pnpla3	992.835	8.74397	1.10198	7.93478	2.11e-15	1.6e-13
plxnb1a	1635.53	-4.87918	0.619928	-7.87056	3.53e-15	2.66e-13
dapk1	1924.02	-4.6932	0.596478	-7.86819	3.6e-15	2.7e-13
mpzl2b	897.666	-12.7649	1.62317	-7.86416	3.72e-15	2.77e-13
arhgap5	474.973	-4.31952	0.550312	-7.84922	4.19e-15	3.1e-13
ebf3b	382.525	-8.55298	1.09049	-7.84322	4.39e-15	3.24e-13
loxl3a	131.712	-21.8739	2.78957	-7.84133	4.46e-15	3.27e-13
cadm4	3185.18	3.84267	0.492481	7.80266	6.06e-15	4.42e-13
si:ch1073-392o20.2	4191.11	-3.30525	0.423784	-7.79937	6.22e-15	4.51e-13
znf385a	1510.93	10.3462	1.32813	7.79007	6.7e-15	4.82e-13
adap2	639.553	-12.5186	1.60752	-7.78754	6.83e-15	4.89e-13
dicp3.1	921.423	-6.15812	0.791082	-7.78443	7e-15	4.99e-13
si:ch211-153b23.7	1691.48	3.14054	0.405313	7.74843	9.3e-15	6.59e-13
tmem63ba	2028.94	-3.83486	0.495604	-7.73774	1.01e-14	7.13e-13
flt3	9152.75	11.3987	1.47379	7.73432	1.04e-14	7.28e-13
si:ch211-283g2.2__1	594.776	-8.95604	1.15847	-7.73092	1.07e-14	7.43e-13
col5a1	703.455	-10.3143	1.33451	-7.72895	1.08e-14	7.51e-13
c1qa	449.956	-9.72386	1.25859	-7.72598	1.11e-14	7.64e-13
s1pr1	498.615	8.34902	1.08077	7.72507	1.12e-14	7.66e-13
agpat3	1812.2	3.13847	0.407244	7.7066	1.29e-14	8.8e-13
git2b	5663.21	-3.11732	0.404759	-7.70166	1.34e-14	9.1e-13
si:dkey-13m1.2	1174.57	13.9576	1.81879	7.67413	1.67e-14	1.12e-12
smad6b	119.623	-21.8039	2.8432	-7.66877	1.74e-14	1.16e-12
arhgef3	860.36	13.6382	1.77837	7.66897	1.73e-14	1.16e-12
slc12a7b	563.673	6.9654	0.908697	7.66527	1.78e-14	1.18e-12
mafgb	1789.31	2.98829	0.39013	7.65974	1.86e-14	1.23e-12
def6a	2687.9	4.54689	0.594064	7.65387	1.95e-14	1.28e-12
lzts2a	437.088	-12.2841	1.61014	-7.62921	2.36e-14	1.53e-12
CABZ01117603.1	304.186	6.81877	0.893691	7.6299	2.35e-14	1.53e-12
adgrd2	622.997	-12.3178	1.62008	-7.60318	2.89e-14	1.87e-12
si:dkeyp-117b11.1	1159.32	9.70571	1.27745	7.59775	3.01e-14	1.94e-12
coro1b	249.667	6.71267	0.885014	7.58482	3.33e-14	2.13e-12
si:ch211-160f23.5	133.284	-21.4393	2.82757	-7.58223	3.4e-14	2.16e-12
si:dkey-253i9.4	5105.51	2.98148	0.395215	7.54395	4.56e-14	2.89e-12
ctnna1	806.889	-7.70729	1.02231	-7.53912	4.73e-14	2.98e-12
p4ha1a	394.03	-11.9095	1.58275	-7.52459	5.29e-14	3.32e-12
insrb	1656.54	-7.84004	1.04212	-7.52317	5.35e-14	3.34e-12
znf609b	399.046	-8.9979	1.19701	-7.517	5.6e-14	3.46e-12
ptpn18	3627.62	3.01911	0.401604	7.51763	5.58e-14	3.46e-12
vmp1	2297.41	-2.92453	0.38994	-7.49995	6.38e-14	3.92e-12
p2rx7	2958.92	2.83277	0.37809	7.49232	6.77e-14	4.14e-12
ppl	355.09	9.79776	1.30863	7.48704	7.04e-14	4.29e-12
ncf2	1871.44	-4.55386	0.609575	-7.47054	7.99e-14	4.84e-12
sdc4	3247.15	-4.25915	0.570465	-7.4661	8.26e-14	4.98e-12
c1qtnf5	235.817	10.2052	1.36767	7.4617	8.54e-14	5.13e-12
appb	1234.39	-5.1711	0.693358	-7.45806	8.78e-14	5.24e-12
rgs5b	457.248	-8.38713	1.12468	-7.45734	8.83e-14	5.25e-12
si:ch211-186j3.6	1069.41	-11.905	1.59666	-7.45618	8.91e-14	5.27e-12
si:dkeyp-23e4.3	1279.03	-11.351	1.52451	-7.44572	9.64e-14	5.68e-12
fndc3bb	675.406	-9.64158	1.29624	-7.43812	1.02e-13	5.99e-12
hhipl1	873.933	-12.2569	1.64846	-7.43539	1.04e-13	6.08e-12
sh3pxd2b	478.078	-12.517	1.68368	-7.43431	1.05e-13	6.1e-12
si:ch211-106a19.1	810.493	-7.49889	1.01454	-7.39142	1.45e-13	8.4e-12
mafba	3242.06	-6.02739	0.816739	-7.37983	1.58e-13	9.12e-12
yes1	934.789	-4.0153	0.544782	-7.37047	1.7e-13	9.74e-12
mtmr12	1910.39	3.05304	0.414463	7.36625	1.75e-13	1e-11
trps1	1038.14	-4.63943	0.629925	-7.36505	1.77e-13	1.01e-11
arvcfb	1930.71	7.79224	1.05972	7.3531	1.94e-13	1.09e-11
calm1b	306.369	6.03361	0.82069	7.35188	1.95e-13	1.1e-11
CABZ01079192.1	1214.19	-11.2777	1.5399	-7.32363	2.41e-13	1.35e-11
igf2b	488.041	-8.04653	1.10033	-7.31285	2.62e-13	1.46e-11
swap70b	1850.47	-3.52706	0.483021	-7.30209	2.83e-13	1.57e-11
ppp1r14bb	333.144	5.86064	0.803335	7.29539	2.98e-13	1.65e-11
ttll12	1035.61	7.18816	0.98658	7.28594	3.19e-13	1.76e-11
aldh8a1	402.816	-7.71461	1.06044	-7.27491	3.47e-13	1.9e-11
mon1ba	1054.2	13.9262	1.9154	7.27068	3.58e-13	1.95e-11
rassf2a	2386.3	-3.84774	0.529342	-7.26891	3.62e-13	1.97e-11
si:ch211-225b11.1	320.7	-9.06202	1.24739	-7.26479	3.74e-13	2.02e-11
itpk1b	484.263	4.19825	0.578076	7.26246	3.8e-13	2.05e-11
pdgfd	850.308	-11.3026	1.55753	-7.25675	3.97e-13	2.13e-11
mmd2a	90.5839	-21.1001	2.90836	-7.25496	4.02e-13	2.15e-11
arhgef10	971.092	-4.10082	0.566286	-7.24162	4.43e-13	2.36e-11
xcr1a.1	634.416	6.00299	0.831695	7.21778	5.28e-13	2.8e-11
arhgap10	253.035	-11.9019	1.6503	-7.21195	5.52e-13	2.91e-11
irak3	2748.28	3.3273	0.461895	7.20357	5.87e-13	3.08e-11
si:dkey-33i11.1	1469.92	-4.70318	0.653109	-7.20121	5.97e-13	3.12e-11
si:ch211-281g13.4	81.6687	-21.1865	2.94793	-7.18692	6.63e-13	3.45e-11
si:ch211-114l13.12	280.73	7.39174	1.02861	7.18611	6.67e-13	3.46e-11
ctsba	4662.29	-3.34942	0.466274	-7.18338	6.8e-13	3.51e-11
abca1b	4032.41	-4.82191	0.672244	-7.17286	7.34e-13	3.78e-11
fcer1gl	6352.16	-6.68534	0.933629	-7.1606	8.03e-13	4.12e-11
ehbp1l1b	14133.7	3.25768	0.455009	7.1596	8.09e-13	4.13e-11
hipk3b	3040.65	3.92684	0.548872	7.15438	8.4e-13	4.27e-11
ephb2a	92.443	-21.0379	2.94326	-7.14783	8.82e-13	4.46e-11
si:ch211-217k17.11	93.7016	-21.0046	2.94863	-7.12351	1.05e-12	5.3e-11
adgrl1a	517.257	6.21391	0.873725	7.11198	1.14e-12	5.74e-11
pigrl4.2	2037.71	10.5122	1.47832	7.11094	1.15e-12	5.76e-11
il4r.1	859.25	-11.5602	1.62595	-7.10982	1.16e-12	5.79e-11
scinlb	1711.44	11.9557	1.68255	7.1057	1.2e-12	5.94e-11
slc18a2	216.464	13.0983	1.84497	7.09947	1.25e-12	6.19e-11
cmtm7	1329.13	5.49042	0.774115	7.09252	1.32e-12	6.48e-11
hepacam2	2763.22	9.46048	1.33416	7.09096	1.33e-12	6.53e-11
lrp5	446.409	-8.81478	1.24482	-7.08116	1.43e-12	6.98e-11
zfp36l1b	3486.91	-2.80554	0.397622	-7.0558	1.72e-12	8.35e-11
tbc1d10b	4478.13	2.87461	0.408781	7.03214	2.03e-12	9.86e-11
yrk	4302.47	2.64273	0.375892	7.03057	2.06e-12	9.93e-11
fosl1a	669.927	-4.75228	0.676486	-7.02496	2.14e-12	1.03e-10
rbfa	109.499	-20.2911	2.89015	-7.0208	2.21e-12	1.06e-10
si:dkey-5n18.1	499.395	-7.4515	1.06532	-6.99464	2.66e-12	1.27e-10
adgrg1__2	526.436	4.23016	0.605057	6.99134	2.72e-12	1.29e-10
pim3	75.9868	-20.7616	2.97002	-6.99041	2.74e-12	1.3e-10
abi1b	1796.51	-5.57545	0.799268	-6.97569	3.04e-12	1.44e-10
itga5	83.8499	-20.5574	2.95996	-6.94519	3.78e-12	1.78e-10
dhrs9	806.652	-11.1083	1.60226	-6.93293	4.12e-12	1.93e-10
ddr2a	570.656	-11.2964	1.63068	-6.9274	4.29e-12	2e-10
si:dkeyp-9d4.3	319.336	-11.3398	1.63723	-6.92621	4.32e-12	2.01e-10
nav3	7045.58	2.61145	0.377411	6.91939	4.54e-12	2.1e-10
cx43	1330.07	-3.47754	0.502872	-6.91536	4.67e-12	2.15e-10
sc:d156	373.334	-11.3578	1.64298	-6.91296	4.75e-12	2.18e-10
il21r.1	2094.09	4.38692	0.634645	6.9124	4.77e-12	2.18e-10
si:dkey-34e4.1	608.981	-10.6065	1.5388	-6.8927	5.47e-12	2.5e-10
GRB14	177.63	7.09923	1.03087	6.88665	5.71e-12	2.6e-10
zgc:64189	371.6	-11.7043	1.70316	-6.87212	6.33e-12	2.87e-10
tmem178	536.32	12.9676	1.89137	6.85618	7.07e-12	3.19e-10
pde4ba	3529.43	3.2515	0.474324	6.85503	7.13e-12	3.21e-10
fer	1149.46	8.06477	1.17681	6.85309	7.23e-12	3.24e-10
si:ch211-193e13.5	234.51	-11.3393	1.65571	-6.84859	7.46e-12	3.33e-10
galnt1	1114.02	3.66358	0.535076	6.84684	7.55e-12	3.36e-10
si:ch211-222k6.3	1734.72	-10.9836	1.60556	-6.84097	7.87e-12	3.49e-10
tiam1a	5740.11	5.30649	0.776603	6.83295	8.32e-12	3.68e-10
b4galnt4a	558.02	8.61169	1.26125	6.82792	8.62e-12	3.8e-10
fgd4a	920.861	5.66675	0.830853	6.8204	9.08e-12	3.99e-10
tdrd12	185.004	12.8719	1.88863	6.81545	9.4e-12	4.11e-10
trib3	1400.39	-3.59703	0.528513	-6.80594	1e-11	4.38e-10
zgc:77486__1	454.352	-9.37302	1.38003	-6.79191	1.11e-11	4.81e-10
RASGRP2	184.917	6.04973	0.892933	6.77512	1.24e-11	5.38e-10
pard6a	307.753	6.52415	0.963424	6.77184	1.27e-11	5.49e-10
nitr10a	477.613	-11.206	1.65528	-6.76983	1.29e-11	5.55e-10
parm1	762.423	6.01	0.889541	6.75629	1.42e-11	6.07e-10
rgl2	3544.84	3.00701	0.446083	6.74093	1.57e-11	6.72e-10
tmem206	216.68	-11.1782	1.65926	-6.73685	1.62e-11	6.89e-10
xpnpep2	256.146	-11.0133	1.63701	-6.72765	1.72e-11	7.32e-10
cyth4a	1523.93	10.4433	1.55422	6.71933	1.83e-11	7.72e-10
qrsl1	382.948	4.44323	0.661956	6.71227	1.92e-11	8.08e-10
si:busm1-57f23.1	349.227	13.7628	2.0566	6.692	2.2e-11	9.25e-10
si:dkey-19a16.11__2	196.155	11.5083	1.72362	6.67681	2.44e-11	1.02e-09
ace	338.983	-9.44614	1.41546	-6.67357	2.5e-11	1.04e-09
mapk8ip3	2902.45	3.92296	0.588201	6.66943	2.57e-11	1.07e-09
ccr12a	2586.7	-5.53254	0.830849	-6.6589	2.76e-11	1.14e-09
naprt	77.7007	-19.9046	2.99004	-6.65698	2.8e-11	1.16e-09
trpc5a	115.533	-19.4482	2.92524	-6.64843	2.96e-11	1.22e-09
pcdh7b	1608.78	8.21593	1.23589	6.64781	2.97e-11	1.22e-09
prkcab	448.15	-4.89953	0.737189	-6.64623	3.01e-11	1.23e-09
pgd	1158.22	-4.18044	0.631181	-6.62321	3.51e-11	1.43e-09
zdhhc4	72.2949	-20.2089	3.05213	-6.62125	3.56e-11	1.45e-09
id1	268.767	-8.75023	1.32207	-6.6186	3.63e-11	1.47e-09
drd1b	1166.9	5.57295	0.842205	6.61709	3.66e-11	1.48e-09
cobl	379.865	-8.09972	1.22599	-6.60669	3.93e-11	1.58e-09
fnbp1l	631.35	4.49914	0.681318	6.60358	4.01e-11	1.61e-09
dok2	1113.04	2.69121	0.408426	6.58923	4.42e-11	1.77e-09
sdcbp2	2818.77	-2.67435	0.405982	-6.58734	4.48e-11	1.79e-09
snphb	279.167	-11.2282	1.70598	-6.58169	4.65e-11	1.85e-09
arhgef16	330.745	-10.7001	1.62604	-6.58044	4.69e-11	1.86e-09
ctsd	2316.26	-3.15478	0.48026	-6.56889	5.07e-11	2e-09
plbd1	687.869	-6.3602	0.968794	-6.56507	5.2e-11	2.05e-09
pkig	334.253	-10.6134	1.61821	-6.55869	5.43e-11	2.13e-09
si:ch1073-345a8.1__1	82.2751	-19.7943	3.02207	-6.54993	5.76e-11	2.25e-09
evla	670.458	-11.0503	1.68877	-6.54343	6.01e-11	2.34e-09
clic5b	572.09	-10.5997	1.61999	-6.54309	6.03e-11	2.34e-09
si:dkey-21a6.5	200.18	-7.09254	1.0849	-6.53754	6.25e-11	2.43e-09
si:zfos-741a10.3	891.892	-7.08732	1.08625	-6.52459	6.82e-11	2.64e-09
bcl2l10	1315.98	3.31291	0.509284	6.50504	7.77e-11	2.99e-09
tlr5a	330.939	-10.8285	1.66796	-6.49207	8.47e-11	3.25e-09
adam19a	70.9714	-19.6791	3.03151	-6.4915	8.5e-11	3.26e-09
dennd1b	3516.97	3.24877	0.501503	6.47807	9.29e-11	3.55e-09
akt3a	3102.76	2.88427	0.445678	6.47164	9.69e-11	3.69e-09
ptpn21	303.393	-9.29192	1.43709	-6.46577	1.01e-10	3.83e-09
sult5a1	450.659	13.9154	2.15497	6.45736	1.07e-10	4.03e-09
timp4.3	982.15	-6.32619	0.980058	-6.45492	1.08e-10	4.06e-09
dpp7	755.569	-3.20865	0.497062	-6.45524	1.08e-10	4.06e-09
lrch2	3239.01	2.97039	0.460104	6.45592	1.08e-10	4.06e-09
CABZ01088484.1	570.666	-10.3545	1.60602	-6.44727	1.14e-10	4.26e-09
nitr12	69.9694	-19.5013	3.03246	-6.43086	1.27e-10	4.73e-09
entpd2a.1	1336.71	-7.16318	1.11629	-6.41693	1.39e-10	5.17e-09
tnfaip2b	67.5556	-19.7094	3.0739	-6.41186	1.44e-10	5.31e-09
prkcha	727.853	6.06963	0.946633	6.4118	1.44e-10	5.31e-09
scarf1	444.375	-9.79618	1.52813	-6.41055	1.45e-10	5.34e-09
agpat4	317.982	-8.95654	1.39784	-6.40739	1.48e-10	5.44e-09
tgm2l	7824	-7.57057	1.18239	-6.40275	1.53e-10	5.59e-09
osbpl5	507.94	-4.77752	0.746617	-6.3989	1.57e-10	5.72e-09
CHST13	823.716	-6.37105	0.995895	-6.39731	1.58e-10	5.76e-09
LO018176.1	2814.71	2.53652	0.397937	6.37418	1.84e-10	6.68e-09
plxnb1b	5052.79	7.47217	1.17241	6.37336	1.85e-10	6.7e-09
mapta	1528.49	3.14087	0.493049	6.3703	1.89e-10	6.81e-09
2012-09-01	2502.11	2.82945	0.444637	6.36349	1.97e-10	7.1e-09
gpr132b	74.4727	-19.3661	3.04594	-6.35799	2.04e-10	7.34e-09
tpcn3	555.324	-12.4113	1.95223	-6.3575	2.05e-10	7.34e-09
ccdc57	1488.06	-2.66998	0.420291	-6.35269	2.12e-10	7.55e-09
dact1	3401.24	-7.97746	1.25725	-6.34517	2.22e-10	7.91e-09
grinab	332.451	-11.1902	1.76514	-6.33957	2.3e-10	8.18e-09
mitfb	766.808	-3.52259	0.555753	-6.33841	2.32e-10	8.22e-09
gadd45ga	756.349	-5.04999	0.797431	-6.33282	2.41e-10	8.5e-09
kcnq5b	3342.7	3.78432	0.597765	6.33079	2.44e-10	8.59e-09
si:ch211-195b15.7	101.088	-19.0521	3.01135	-6.32674	2.5e-10	8.79e-09
slc24a3	928.358	-5.82071	0.921433	-6.31702	2.67e-10	9.34e-09
gpc1b	532.795	-8.43687	1.33601	-6.31497	2.7e-10	9.43e-09
si:ch211-266g18.9	784.338	-4.37499	0.693009	-6.31303	2.74e-10	9.53e-09
fam13a	838.229	-4.08927	0.648037	-6.31023	2.79e-10	9.67e-09
fam43a	982.046	-4.56466	0.723687	-6.30751	2.84e-10	9.82e-09
si:ch211-113g11.6	941.808	8.53849	1.35407	6.30578	2.87e-10	9.9e-09
FO907110.1	2415.48	-7.8928	1.25352	-6.29651	3.04e-10	1.05e-08
pip4k2ab	162.023	7.54096	1.19757	6.29686	3.04e-10	1.05e-08
slc16a9a	222.13	-7.94771	1.26365	-6.28949	3.19e-10	1.09e-08
lta4h	2522.03	-6.88203	1.0958	-6.28036	3.38e-10	1.15e-08
tbc1d16	792.211	-3.50578	0.559064	-6.2708	3.59e-10	1.22e-08
tpcn1	2512.12	3.25902	0.519668	6.27135	3.58e-10	1.22e-08
adcy7	2286.93	-4.42665	0.706055	-6.26955	3.62e-10	1.23e-08
sec61a1	2485.06	-2.40937	0.384338	-6.26889	3.64e-10	1.23e-08
pex11a	72.8348	-19.1498	3.05615	-6.26599	3.7e-10	1.25e-08
il10ra	2473.59	-3.95941	0.633662	-6.24845	4.15e-10	1.39e-08
b4galt1	288.354	-11.2559	1.80406	-6.23924	4.4e-10	1.47e-08
GNAZ	617.1	3.63633	0.584217	6.22427	4.84e-10	1.62e-08
gpatch8	7912.41	2.50471	0.402825	6.21787	5.04e-10	1.68e-08
si:ch73-141c7.1	62.5868	-19.4532	3.12956	-6.21595	5.1e-10	1.7e-08
phactr4b	249.349	-8.66091	1.39356	-6.21497	5.13e-10	1.7e-08
fgl2a	973.216	-8.00912	1.29171	-6.20042	5.63e-10	1.86e-08
si:dkeyp-123h10.2	183.067	-10.4543	1.68687	-6.19749	5.74e-10	1.89e-08
exoc6b	380.506	-10.585	1.70908	-6.19339	5.89e-10	1.94e-08
arhgap12a	348.549	-4.11327	0.664273	-6.19214	5.94e-10	1.95e-08
mfap4	332.066	-5.33072	0.861147	-6.19025	6.01e-10	1.97e-08
si:dkey-225f5.5	108.956	-18.0441	2.91997	-6.17955	6.43e-10	2.1e-08
dennd5b	1681.47	-5.09484	0.824492	-6.17937	6.44e-10	2.1e-08
si:ch211-74f19.2	352.727	-3.96345	0.642157	-6.17209	6.74e-10	2.19e-08
slc29a1b	1129.09	-3.89638	0.631409	-6.17092	6.79e-10	2.2e-08
kcnn4	181.254	7.08052	1.14953	6.15951	7.3e-10	2.36e-08
hamp	527.709	-11.3899	1.85242	-6.14864	7.82e-10	2.52e-08
lrp1ab	2910.93	-6.87155	1.11842	-6.14399	8.05e-10	2.59e-08
utrn	4604.75	2.64709	0.431028	6.14135	8.18e-10	2.62e-08
plxnc1	12642.2	2.49661	0.406907	6.13557	8.49e-10	2.71e-08
si:ch211-283g2.2__2	203.961	-10.409	1.69773	-6.13111	8.73e-10	2.78e-08
trim46b	129.432	12.3565	2.01547	6.13079	8.74e-10	2.78e-08
nxph2a	673.202	4.39703	0.717392	6.12918	8.83e-10	2.8e-08
cd209	259.203	10.901	1.77965	6.12534	9.05e-10	2.87e-08
lifrb	689.461	-11.7691	1.92226	-6.12254	9.21e-10	2.91e-08
net1	1564.38	6.53068	1.06678	6.12185	9.25e-10	2.91e-08
ank2b	2364.07	6.83267	1.11726	6.11556	9.62e-10	3.02e-08
pfkfb3	4669.51	2.25498	0.369517	6.10252	1.04e-09	3.27e-08
spred2b	554.779	-3.94911	0.648728	-6.08746	1.15e-09	3.59e-08
OSBPL8	3145.92	3.91896	0.644781	6.07796	1.22e-09	3.8e-08
ches1	309.382	4.4375	0.730278	6.07645	1.23e-09	3.82e-08
ophn1	409.487	-3.79131	0.624186	-6.074	1.25e-09	3.87e-08
grin3a	607.153	-9.90696	1.63315	-6.06616	1.31e-09	4.06e-08
aatka	2662.51	-7.4092	1.2221	-6.06269	1.34e-09	4.14e-08
h1f0	1505.86	-4.42605	0.730224	-6.06122	1.35e-09	4.16e-08
si:ch211-196f2.3	117.405	-18.2391	3.01401	-6.05144	1.44e-09	4.41e-08
mibp2	1138.45	-3.22614	0.533149	-6.0511	1.44e-09	4.41e-08
ctsa	2870.77	-2.40423	0.399141	-6.02351	1.71e-09	5.22e-08
zgc:154125	2863.88	-6.19712	1.02956	-6.01916	1.75e-09	5.35e-08
CU984600.1	812.748	3.51678	0.584796	6.0137	1.81e-09	5.52e-08
mical1	600.838	-4.92025	0.818593	-6.01062	1.85e-09	5.61e-08
rab7b	601.496	-3.00264	0.500137	-6.00363	1.93e-09	5.85e-08
si:ch211-59d17.3	222.654	9.32453	1.55455	5.99821	1.99e-09	6.03e-08
osbp	1926.73	-2.41794	0.403891	-5.98662	2.14e-09	6.46e-08
si:dkey-65j6.2	402.295	-11.2307	1.88244	-5.96607	2.43e-09	7.31e-08
ccl34b.4	250.12	11.2415	1.88788	5.95459	2.61e-09	7.82e-08
npnt	258.383	-10.6635	1.79151	-5.95221	2.65e-09	7.9e-08
sgk1	1908.8	-5.5888	0.938949	-5.95218	2.65e-09	7.9e-08
cxcr3.2	1764.63	-6.17031	1.03691	-5.9507	2.67e-09	7.96e-08
cdk6	2431.45	8.70817	1.46617	5.93939	2.86e-09	8.5e-08
phldb1b	176.8	-6.35456	1.07156	-5.93022	3.03e-09	8.97e-08
mybpha	127.857	12.3387	2.08083	5.92969	3.04e-09	8.98e-08
fbxo41	977.734	-5.8148	0.981434	-5.9248	3.13e-09	9.22e-08
atp1b3b	339.86	10.2556	1.73103	5.92456	3.13e-09	9.22e-08
stx3a	631.278	13.1247	2.21582	5.92318	3.16e-09	9.28e-08
si:ch211-264f5.2	546.227	-9.78832	1.65447	-5.91628	3.29e-09	9.65e-08
si:ch211-79k12.1	1400.61	2.96655	0.501611	5.91403	3.34e-09	9.76e-08
CABZ01076275.1	1432.82	-4.59482	0.779901	-5.89155	3.83e-09	1.11e-07
jun	1786.78	-2.49193	0.422897	-5.89252	3.8e-09	1.11e-07
abcc12	657.726	-4.17582	0.709216	-5.88793	3.91e-09	1.14e-07
rbms3	342.292	-8.58039	1.45797	-5.88518	3.98e-09	1.15e-07
piezo1	162.856	-10.5543	1.79488	-5.88021	4.1e-09	1.18e-07
hrasb	221.17	5.9208	1.00704	5.87943	4.12e-09	1.19e-07
shmt1	110.443	-10.5404	1.79354	-5.87686	4.18e-09	1.2e-07
si:ch211-158d24.4	325.395	-9.83324	1.67453	-5.87225	4.3e-09	1.23e-07
cadm1a	992.446	8.26646	1.40782	5.87182	4.31e-09	1.23e-07
lpcat1	910.378	4.22103	0.718965	5.87098	4.33e-09	1.24e-07
si:ch73-281f12.4	112.092	-8.22385	1.40153	-5.86776	4.42e-09	1.26e-07
sb:cb649	405.78	7.82341	1.33346	5.86698	4.44e-09	1.26e-07
marco	2236.07	-6.59668	1.12579	-5.85959	4.64e-09	1.31e-07
si:ch211-204c21.1__1	5564.06	-3.61878	0.617557	-5.85984	4.63e-09	1.31e-07
si:ch73-52p7.1	344.384	-10.1307	1.73318	-5.84517	5.06e-09	1.43e-07
krt8	947.119	-4.40933	0.754783	-5.84185	5.16e-09	1.46e-07
si:ch211-11p18.6__1	337.969	5.72013	0.979566	5.83946	5.24e-09	1.47e-07
RTKN	58.6773	-18.5888	3.18695	-5.8328	5.45e-09	1.53e-07
si:dkey-16m19.1	324.492	12.2057	2.09308	5.83145	5.49e-09	1.54e-07
brinp3b	344.792	-9.13095	1.56635	-5.82943	5.56e-09	1.55e-07
mhc1uba	1627.24	-13.326	2.28624	-5.82879	5.58e-09	1.56e-07
nrp1b	902.412	-7.00365	1.20175	-5.82788	5.61e-09	1.56e-07
peli1a	308.178	-9.94205	1.70758	-5.8223	5.8e-09	1.6e-07
igf2bp3	106.894	6.33615	1.08817	5.82274	5.79e-09	1.6e-07
sla2	476.659	7.46706	1.2824	5.82275	5.79e-09	1.6e-07
rasgrp3	377.88	5.58705	0.961116	5.81308	6.13e-09	1.69e-07
rapgef6	3048.82	2.99748	0.516667	5.80157	6.57e-09	1.81e-07
porb	756.093	-3.42532	0.590756	-5.7982	6.7e-09	1.84e-07
renbp	320.734	-6.08093	1.05152	-5.78299	7.34e-09	2.01e-07
plin2	409.948	-6.04763	1.0466	-5.77835	7.54e-09	2.06e-07
pik3cd	2139.34	2.87952	0.499645	5.76314	8.26e-09	2.25e-07
abca12	273.08	9.32203	1.61925	5.757	8.56e-09	2.33e-07
ctsc	4838.33	-2.06696	0.359521	-5.74921	8.97e-09	2.44e-07
cbfa2t3	434.267	-4.95082	0.861483	-5.74686	9.09e-09	2.46e-07
bik	164.673	7.81292	1.36341	5.73044	1e-08	2.71e-07
esyt1b	490.03	3.50382	0.611864	5.72648	1.03e-08	2.77e-07
SCARF2	379.367	-7.62953	1.33286	-5.72416	1.04e-08	2.8e-07
vps54	2015.66	4.20835	0.735583	5.72111	1.06e-08	2.84e-07
tp53bp2a	151.26	-9.86791	1.72603	-5.71713	1.08e-08	2.91e-07
CR381673.2	368.333	-24.3602	4.26651	-5.70964	1.13e-08	3.02e-07
si:ch73-177h5.2	208.68	4.5291	0.793199	5.70991	1.13e-08	3.02e-07
CABZ01114581.1	673.96	3.0138	0.528066	5.70724	1.15e-08	3.05e-07
pknox2	107.395	9.06166	1.58756	5.70792	1.14e-08	3.05e-07
slc43a2b	1206.22	-5.71021	1.00096	-5.70471	1.17e-08	3.09e-07
arhgap27l	1381.52	2.67998	0.470377	5.69752	1.22e-08	3.22e-07
fgd4b	2195.27	2.76512	0.486047	5.68899	1.28e-08	3.37e-07
gpr37a	1125.15	9.33429	1.64077	5.68895	1.28e-08	3.37e-07
zgc:112492	112.934	-10.2703	1.80616	-5.68626	1.3e-08	3.42e-07
adgrg1__1	233.549	6.56082	1.15393	5.68563	1.3e-08	3.42e-07
si:ch211-252f13.5	237.262	-9.27492	1.63439	-5.67484	1.39e-08	3.64e-07
ndrg1a	345.756	-3.57506	0.630243	-5.67251	1.41e-08	3.68e-07
tlr22	1682.83	-4.75716	0.838854	-5.67103	1.42e-08	3.7e-07
msi1	567.448	8.60725	1.51965	5.66396	1.48e-08	3.85e-07
cyth3a	691.153	-6.78916	1.19909	-5.66194	1.5e-08	3.89e-07
ptges	228.418	-10.9168	1.92951	-5.65783	1.53e-08	3.98e-07
klf12b	509.781	-6.55043	1.15833	-5.65505	1.56e-08	4.03e-07
pdk2b	4092.07	-4.44728	0.787504	-5.64731	1.63e-08	4.21e-07
tspo	146.408	-10.1666	1.80438	-5.63442	1.76e-08	4.53e-07
rgs13	3703.82	3.31287	0.588009	5.63405	1.76e-08	4.53e-07
si:ch211-157p22.10	243.142	4.5702	0.811567	5.63133	1.79e-08	4.59e-07
lipg	470.872	-10.1354	1.80092	-5.62791	1.82e-08	4.67e-07
deptor	685.289	-2.6283	0.468129	-5.61447	1.97e-08	5.04e-07
hecw2b	133.557	-10.2112	1.82097	-5.60755	2.05e-08	5.24e-07
hbegfb	1072.91	-3.66718	0.654342	-5.60438	2.09e-08	5.32e-07
lpar6b	345.374	10.2066	1.82199	5.60188	2.12e-08	5.39e-07
arhgap1	1464.53	3.80547	0.680134	5.59518	2.2e-08	5.59e-07
syngap1b	776.136	-4.19493	0.750412	-5.59016	2.27e-08	5.74e-07
itprid1	303.387	-9.20919	1.64985	-5.58185	2.38e-08	6.01e-07
tlcd2	172.362	-10.0784	1.80625	-5.57971	2.41e-08	6.07e-07
si:dkey-8e10.2	393.516	26.678	4.78485	5.57551	2.47e-08	6.21e-07
ugt2a1	464.497	-7.19236	1.2913	-5.56986	2.55e-08	6.4e-07
si:ch211-28p3.3	102.026	12.0131	2.16116	5.55864	2.72e-08	6.81e-07
gpcpd1	4071.87	-2.66818	0.480322	-5.55499	2.78e-08	6.94e-07
si:ch73-248e21.5	2162.76	-3.30018	0.594312	-5.55294	2.81e-08	7.01e-07
anxa11b	2918.53	2.30507	0.415639	5.54586	2.93e-08	7.29e-07
si:dkey-69o16.5	185.924	-9.90693	1.78775	-5.54156	3e-08	7.45e-07
atrn	1649.64	2.32632	0.42034	5.53438	3.12e-08	7.75e-07
si:dkey-53k12.1	438.277	8.29287	1.49859	5.53377	3.13e-08	7.76e-07
CABZ01073033.1	98.7108	11.9655	2.16888	5.5169	3.45e-08	8.53e-07
si:ch211-209f23.6	928.79	-3.71943	0.674318	-5.51585	3.47e-08	8.54e-07
adgre9	321.887	5.3962	0.978262	5.51611	3.47e-08	8.54e-07
trak1a	199.341	-9.35299	1.69662	-5.51271	3.53e-08	8.68e-07
tyrobp	200.057	6.71236	1.21935	5.50486	3.69e-08	9.06e-07
fnbp1b__2	2571.28	2.04844	0.372224	5.50324	3.73e-08	9.12e-07
scpep1	3685.97	-3.37733	0.614137	-5.49931	3.81e-08	9.31e-07
tjap1	437.302	-3.23022	0.588387	-5.48996	4.02e-08	9.8e-07
capn8	295.586	-23.9022	4.36163	-5.48011	4.25e-08	1.03e-06
gramd1bb	551.743	-7.15899	1.3064	-5.47993	4.25e-08	1.03e-06
grb10b	887.476	-2.61557	0.477218	-5.48087	4.23e-08	1.03e-06
si:dkey-22o12.2	1284.71	2.64043	0.483634	5.45957	4.77e-08	1.15e-06
p2ry8	102.809	12.0189	2.20218	5.45771	4.82e-08	1.16e-06
dock4b	7941.47	-2.99199	0.549467	-5.44526	5.17e-08	1.24e-06
ptprea	1814.44	2.47838	0.455134	5.44539	5.17e-08	1.24e-06
chrna5	283.197	8.43131	1.55018	5.43892	5.36e-08	1.29e-06
casz1	271.513	6.68102	1.23188	5.42345	5.85e-08	1.4e-06
map4k5	2066.51	2.1034	0.388093	5.41983	5.97e-08	1.43e-06
tie1	249.521	-9.01738	1.66421	-5.41843	6.01e-08	1.44e-06
cnot6a	3903.16	2.66749	0.492867	5.41219	6.23e-08	1.48e-06
CABZ01111959.1	3731.75	3.26199	0.602627	5.41294	6.2e-08	1.48e-06
sulf2b	1705.12	-2.45313	0.453812	-5.40561	6.46e-08	1.53e-06
ogdhb	1735.06	-2.32601	0.43144	-5.39128	7e-08	1.66e-06
lyst	7501	2.19235	0.4068	5.38927	7.07e-08	1.67e-06
si:ch211-191i18.2	132.004	-11.0583	2.05294	-5.38659	7.18e-08	1.69e-06
tmem176l.4	149.727	-7.75427	1.44019	-5.38419	7.28e-08	1.71e-06
gpat3	412.082	-3.34764	0.62215	-5.38076	7.42e-08	1.74e-06
arhgap17b	6065.94	2.2297	0.414331	5.38145	7.39e-08	1.74e-06
si:busm1-104n07.3	194.78	10.8819	2.02256	5.38026	7.44e-08	1.74e-06
tmem136b	103.94	-9.7173	1.80697	-5.37766	7.55e-08	1.76e-06
CR385050.1	435.137	5.60144	1.04224	5.37441	7.68e-08	1.79e-06
akt3b	94.1358	11.8971	2.21668	5.36707	8e-08	1.86e-06
tmem178b	307.063	-9.56673	1.78458	-5.36077	8.29e-08	1.93e-06
atp7a	1742.42	-2.50767	0.468197	-5.35602	8.51e-08	1.97e-06
si:ch211-250k18.5	97.0225	7.60458	1.41966	5.35662	8.48e-08	1.97e-06
il34	132.141	5.35243	1.00121	5.34597	8.99e-08	2.08e-06
ece1	163.696	-9.61991	1.80242	-5.33723	9.44e-08	2.17e-06
cdh4	171.267	9.00276	1.68654	5.33801	9.4e-08	2.17e-06
camkk1a	1695.91	2.15965	0.405168	5.33026	9.81e-08	2.26e-06
dia1b	286.104	4.40777	0.827355	5.32755	9.95e-08	2.29e-06
si:dkey-22i16.9	441.263	7.03853	1.32209	5.3238	1.02e-07	2.33e-06
igf1	228.071	-10.0734	1.89263	-5.32245	1.02e-07	2.34e-06
roraa	446.579	5.02571	0.944638	5.32025	1.04e-07	2.37e-06
si:ch211-195b13.1	552.985	-3.29974	0.621928	-5.30565	1.12e-07	2.56e-06
cenpf	167.705	-8.68394	1.64118	-5.29127	1.21e-07	2.76e-06
spag1a	2142.05	2.42087	0.45758	5.29059	1.22e-07	2.77e-06
cdh18a	124.062	10.8523	2.0519	5.28892	1.23e-07	2.79e-06
elmo3	973.323	2.76495	0.523435	5.28232	1.28e-07	2.89e-06
fgd6	166.371	-9.16857	1.73668	-5.27936	1.3e-07	2.93e-06
sptbn5	136.252	-9.2765	1.75923	-5.27305	1.34e-07	3.02e-06
tpm1	1366.46	6.49365	1.23283	5.26728	1.38e-07	3.11e-06
tent5bb	107.373	12.0497	2.28748	5.26769	1.38e-07	3.11e-06
si:ch211-278p9.3	112.727	-9.6181	1.82633	-5.26634	1.39e-07	3.12e-06
g0s2	151.294	-9.18259	1.74494	-5.26241	1.42e-07	3.18e-06
ccl34a.4	313.944	-8.30458	1.58577	-5.23695	1.63e-07	3.65e-06
BX323861.3	346.963	-8.91629	1.70368	-5.23355	1.66e-07	3.7e-06
tescb	994.21	2.91893	0.557737	5.23352	1.66e-07	3.7e-06
egr2b	178.241	-6.5454	1.25335	-5.22234	1.77e-07	3.93e-06
tent5ba	131.817	-9.24757	1.77205	-5.21858	1.8e-07	3.99e-06
cltcl1	96.152	6.76282	1.29587	5.21876	1.8e-07	3.99e-06
adam12	80.3234	-10.1846	1.95217	-5.21705	1.82e-07	4.01e-06
si:dkey-205h13.1	505.793	-4.89677	0.938617	-5.21701	1.82e-07	4.01e-06
stambpl1	358.393	4.06943	0.780032	5.21701	1.82e-07	4.01e-06
CABZ01019904.1	80.8855	-10.0461	1.92815	-5.21022	1.89e-07	4.15e-06
rbck1	486.377	-2.59223	0.497564	-5.20984	1.89e-07	4.15e-06
si:ch211-269k10.4	555.841	3.82163	0.734161	5.20544	1.94e-07	4.24e-06
fosb	1675.03	-3.17435	0.610184	-5.20229	1.97e-07	4.31e-06
cx32.2	2564.48	-2.83654	0.54534	-5.20141	1.98e-07	4.32e-06
cdc42se2	808.856	-4.13189	0.794874	-5.19817	2.01e-07	4.39e-06
zcchc14	234.101	-7.61424	1.46514	-5.19692	2.03e-07	4.41e-06
arhgap33	697.649	4.1261	0.794278	5.19478	2.05e-07	4.45e-06
si:dkey-1h24.6	160.612	-9.81105	1.89248	-5.18422	2.17e-07	4.71e-06
specc1	6296.27	3.17305	0.613129	5.17517	2.28e-07	4.93e-06
foxc1b	149.602	-10.3875	2.00851	-5.17175	2.32e-07	5.01e-06
skib	140.414	-9.47674	1.83295	-5.17021	2.34e-07	5.04e-06
si:dkey-87o1.2	112.654	12.156	2.35099	5.17057	2.33e-07	5.04e-06
akt2l	100.086	-9.51785	1.84144	-5.16869	2.36e-07	5.07e-06
si:ch73-380l3.4	352.027	-10.2018	1.97468	-5.16628	2.39e-07	5.13e-06
acot11b	101.881	12.0112	2.32772	5.16006	2.47e-07	5.29e-06
def6c	170.796	5.41108	1.05005	5.15316	2.56e-07	5.48e-06
arhgef10la	515.258	-6.95052	1.34998	-5.1486	2.62e-07	5.61e-06
gnaq	143.497	8.75698	1.70185	5.14558	2.67e-07	5.69e-06
grid1b	81.0866	7.04892	1.37036	5.14387	2.69e-07	5.73e-06
acana	219.673	-9.57714	1.86407	-5.13775	2.78e-07	5.91e-06
ifngr1l	1532.56	-3.96186	0.772276	-5.13011	2.9e-07	6.13e-06
prkcaa	1443.19	4.86455	0.948271	5.12992	2.9e-07	6.13e-06
si:ch211-212d10.1	267.566	13.2706	2.58666	5.13042	2.89e-07	6.13e-06
rac2	2967.68	2.17029	0.423322	5.12681	2.95e-07	6.22e-06
mogat3b	79.0439	-9.69929	1.89403	-5.12099	3.04e-07	6.41e-06
btbd11b	558.418	4.28541	0.836944	5.12031	3.05e-07	6.42e-06
shc2	240.131	-3.86554	0.755456	-5.11683	3.11e-07	6.53e-06
stap2b	86.3278	-9.48584	1.85475	-5.11436	3.15e-07	6.6e-06
DTX4	246.364	3.84777	0.752782	5.1114	3.2e-07	6.69e-06
s1pr2	1153.76	3.2318	0.632392	5.11044	3.21e-07	6.72e-06
ugt5a1	191.904	-9.32045	1.82679	-5.10208	3.36e-07	7.01e-06
si:ch211-85n16.4	1003.13	-5.29944	1.04165	-5.08755	3.63e-07	7.56e-06
reck	653.347	-3.22432	0.63409	-5.08496	3.68e-07	7.65e-06
zgc:152863	1053.36	2.33575	0.459557	5.08262	3.72e-07	7.73e-06
BX120005.1	549.492	-3.92878	0.773206	-5.08116	3.75e-07	7.78e-06
sox9b	90.9652	5.67005	1.11614	5.08005	3.77e-07	7.81e-06
nrip1b	152.057	6.75167	1.33009	5.07609	3.85e-07	7.96e-06
rxfp2a	105.353	-10.8052	2.129	-5.07523	3.87e-07	7.98e-06
mtss1	149.302	-11.1818	2.20361	-5.07432	3.89e-07	8e-06
bahcc1b	2888.71	2.6998	0.532038	5.07446	3.89e-07	8e-06
slc16a1b	288.547	-3.52037	0.694422	-5.06949	3.99e-07	8.19e-06
ptpro__2	231.996	11.6319	2.29689	5.06418	4.1e-07	8.41e-06
rap1gap2a	1737.77	6.53055	1.29076	5.05947	4.2e-07	8.6e-06
SAMD8	546.016	-4.52941	0.895802	-5.05627	4.28e-07	8.73e-06
cabz01093075.1	769.359	-5.40511	1.06994	-5.0518	4.38e-07	8.93e-06
c1qb	972.072	-6.53819	1.29601	-5.04485	4.54e-07	9.24e-06
plrdgb	104.432	-10.7925	2.14081	-5.04131	4.62e-07	9.4e-06
ero1b	2594.37	2.28857	0.454145	5.0393	4.67e-07	9.48e-06
hadhaa	123.175	-8.85905	1.75825	-5.03857	4.69e-07	9.5e-06
si:ch211-203d1.3	2374.79	1.90378	0.378807	5.02572	5.02e-07	1.01e-05
lrmda	120.714	-5.97987	1.19002	-5.025	5.03e-07	1.02e-05
myh9a	1536.84	-4.60848	0.917085	-5.02514	5.03e-07	1.02e-05
wdfy4	6063.41	1.70384	0.339104	5.02454	5.05e-07	1.02e-05
fzd2	4973.37	-2.65078	0.528311	-5.01747	5.24e-07	1.05e-05
si:ch73-72b7.1	79.686	11.6566	2.32359	5.01663	5.26e-07	1.06e-05
camkvl	222.977	-9.18813	1.83255	-5.01386	5.34e-07	1.07e-05
slc15a4	4965.97	2.05056	0.409408	5.0086	5.48e-07	1.1e-05
rras2	472.429	4.647	0.927779	5.00874	5.48e-07	1.1e-05
nrp1a	972.429	-5.96681	1.19284	-5.00219	5.67e-07	1.13e-05
si:dkey-85k7.12	3969.42	4.1943	0.838714	5.00087	5.71e-07	1.14e-05
kdm2ba	2181.48	3.96217	0.792794	4.99773	5.8e-07	1.15e-05
gnaia	1451.8	2.12245	0.424758	4.99685	5.83e-07	1.16e-05
il12ba	1012.05	7.80374	1.5653	4.98544	6.18e-07	1.23e-05
zgc:110239	975.607	-2.33696	0.468945	-4.98344	6.25e-07	1.24e-05
cyp2k8	126.125	-10.6293	2.1352	-4.97811	6.42e-07	1.26e-05
lgals9l4	72.7508	-9.91718	1.99175	-4.97914	6.39e-07	1.26e-05
si:ch211-26b3.4	1203.56	-6.51787	1.30925	-4.9783	6.41e-07	1.26e-05
zgc:154055	1178.83	2.40615	0.483767	4.97377	6.57e-07	1.29e-05
cped1	90.576	-10.5823	2.12847	-4.97176	6.63e-07	1.3e-05
CU984600.3	2260.9	1.88797	0.37974	4.97173	6.64e-07	1.3e-05
nacc1b	85.8128	10.3088	2.0732	4.97241	6.61e-07	1.3e-05
si:dkey-40g16.6	337.899	-11.834	2.38173	-4.96866	6.74e-07	1.32e-05
zgc:158659	354.138	-4.14374	0.833995	-4.96855	6.75e-07	1.32e-05
si:dkey-4c23.3	2553.53	2.22329	0.447952	4.96324	6.93e-07	1.35e-05
pid1	183.957	-6.69132	1.34931	-4.95908	7.08e-07	1.38e-05
zbtb38	106.727	6.30703	1.27345	4.95273	7.32e-07	1.42e-05
tiam2b	103.819	10.5988	2.14602	4.9388	7.86e-07	1.52e-05
bcor	3501.6	2.01545	0.408342	4.93569	7.99e-07	1.55e-05
plp2	579.157	-3.94621	0.800007	-4.93273	8.11e-07	1.57e-05
slc9a3r1b	95.4258	-9.15999	1.86093	-4.92227	8.55e-07	1.65e-05
dgkza	2679.83	2.83776	0.576511	4.92231	8.55e-07	1.65e-05
sik2b	1545.07	2.37677	0.483156	4.91926	8.69e-07	1.67e-05
vaspb	117.647	-7.73364	1.57262	-4.91767	8.76e-07	1.68e-05
si:cabz01007802.1	100.431	-10.7361	2.18421	-4.91533	8.86e-07	1.7e-05
si:dkey-9i23.15	89.5648	-9.51846	1.93642	-4.9155	8.86e-07	1.7e-05
slc4a4b	869.857	-4.84506	0.985613	-4.91578	8.84e-07	1.7e-05
fcer1g	6759.75	2.09537	0.427584	4.90048	9.56e-07	1.83e-05
acvr2ba	150.503	-9.67463	1.97531	-4.89778	9.69e-07	1.85e-05
slc16a10	595.924	-3.47209	0.709117	-4.89636	9.76e-07	1.86e-05
plagl2	208.56	-5.99982	1.22791	-4.8862	1.03e-06	1.95e-05
col19a1__1	87.641	8.00721	1.64173	4.87729	1.08e-06	2.04e-05
ms4a17a.9	505.733	-5.14235	1.0547	-4.87566	1.08e-06	2.06e-05
si:ch211-212k18.5	806.339	8.58371	1.7616	4.87268	1.1e-06	2.08e-05
esrra	709.562	-2.6208	0.538239	-4.86921	1.12e-06	2.12e-05
csf2rb	3947.01	-4.23739	0.87095	-4.86524	1.14e-06	2.16e-05
si:ch211-165f21.2__1	674.174	3.18699	0.655386	4.86277	1.16e-06	2.18e-05
si:ch73-170d6.3	80.7983	-7.36326	1.51492	-4.8605	1.17e-06	2.2e-05
shroom2a	282.898	7.54213	1.55209	4.85935	1.18e-06	2.21e-05
slc25a39	768.919	2.84932	0.586691	4.85661	1.19e-06	2.24e-05
asip2b	161.038	-9.95548	2.05023	-4.85579	1.2e-06	2.25e-05
cacna1aa	525.978	2.71003	0.558852	4.84928	1.24e-06	2.32e-05
ephx2	1540.16	-3.82431	0.789329	-4.84502	1.27e-06	2.36e-05
dram1	330.771	-4.06611	0.83982	-4.84164	1.29e-06	2.4e-05
mitfa	101.585	-8.91559	1.84201	-4.84013	1.3e-06	2.42e-05
laynb	102.071	-9.21312	1.90497	-4.83636	1.32e-06	2.46e-05
parp12a	3010.04	-4.31089	0.891813	-4.83384	1.34e-06	2.49e-05
raph1a	930.174	-5.8161	1.20351	-4.83263	1.35e-06	2.5e-05
trpv4	106.665	-9.8394	2.03703	-4.83027	1.36e-06	2.52e-05
zgc:101663	219.185	-5.99526	1.24146	-4.82919	1.37e-06	2.53e-05
tspan18a	144.156	-10.8915	2.25902	-4.82134	1.43e-06	2.63e-05
CR847844.1	115.382	12.1907	2.52982	4.81881	1.44e-06	2.66e-05
si:rp71-1g18.1	99.2069	-9.26545	1.92499	-4.81324	1.49e-06	2.73e-05
CABZ01077220.1	99.5703	-8.8487	1.83846	-4.8131	1.49e-06	2.73e-05
osmr	293.536	11.9452	2.48248	4.81182	1.5e-06	2.74e-05
si:ch211-250k18.7	141.467	9.7693	2.03186	4.80807	1.52e-06	2.79e-05
prr14	1112.19	1.97426	0.410837	4.80545	1.54e-06	2.82e-05
sb:cb1058	107.801	-10.2504	2.13719	-4.79622	1.62e-06	2.95e-05
fam49ba	4053.97	2.74103	0.571471	4.79645	1.62e-06	2.95e-05
sh3kbp1	4118.88	2.07479	0.432779	4.79411	1.63e-06	2.98e-05
dock10	15725.6	1.98813	0.414782	4.79319	1.64e-06	2.99e-05
ppp1r13l	827.26	4.64205	0.969134	4.78989	1.67e-06	3.03e-05
irf2	1319.46	2.31287	0.484711	4.77164	1.83e-06	3.31e-05
si:ch211-236p22.1	93.3765	6.10912	1.28064	4.77035	1.84e-06	3.33e-05
pmepa1	439.618	-3.05476	0.641061	-4.76517	1.89e-06	3.41e-05
cdc42se1	751.662	-3.52217	0.739898	-4.76034	1.93e-06	3.49e-05
nr2f2	114.014	-8.19406	1.72345	-4.75446	1.99e-06	3.59e-05
mtmr1a	1192.63	2.48878	0.523586	4.75333	2e-06	3.6e-05
ftr70	165.104	-9.47103	1.99939	-4.73695	2.17e-06	3.9e-05
wipf1b	2259.76	-4.44644	0.939625	-4.73214	2.22e-06	3.98e-05
arpc5b	2190.48	1.9584	0.413854	4.73211	2.22e-06	3.98e-05
si:ch73-24k9.2	1062.4	-5.58018	1.18011	-4.72853	2.26e-06	4.05e-05
cndp2	858.875	-4.31581	0.913989	-4.72195	2.34e-06	4.18e-05
hk2	834.396	-2.97725	0.630909	-4.71898	2.37e-06	4.23e-05
ipcef1	1150.07	4.62799	0.980698	4.71908	2.37e-06	4.23e-05
si:ch211-165f21.2__2	4390.53	3.39392	0.719405	4.71767	2.39e-06	4.25e-05
si:ch211-214c7.4	882.292	7.58001	1.60727	4.71608	2.4e-06	4.27e-05
bnip4	523.94	-3.47865	0.738454	-4.71072	2.47e-06	4.38e-05
fybb	11041.4	1.57928	0.335335	4.70955	2.48e-06	4.4e-05
si:ch211-261d7.6	106.04	-9.60892	2.04118	-4.70754	2.51e-06	4.44e-05
abi2b	2295.01	-2.53893	0.539369	-4.70723	2.51e-06	4.44e-05
zgc:193811	51.2485	11.0112	2.34528	4.69506	2.67e-06	4.7e-05
MFAP4 (1 of many)__6	110.265	7.44095	1.58721	4.68808	2.76e-06	4.86e-05
smad6a	111.04	-8.37582	1.78742	-4.68599	2.79e-06	4.9e-05
stra6l	67.8736	-9.5537	2.03912	-4.6852	2.8e-06	4.92e-05
skap1	122.26	11.6119	2.47889	4.68431	2.81e-06	4.93e-05
si:ch211-74m13.1	111.477	-6.24136	1.33832	-4.66356	3.11e-06	5.45e-05
atp6v1ab	475.503	-2.95173	0.633228	-4.6614	3.14e-06	5.5e-05
ids	511.406	3.06441	0.657532	4.66047	3.15e-06	5.51e-05
gng10	661.283	-4.5981	0.9876	-4.65583	3.23e-06	5.63e-05
plecb	8274.62	-2.5446	0.547066	-4.65135	3.3e-06	5.75e-05
obscnb	104.113	5.1665	1.11129	4.64911	3.33e-06	5.8e-05
ttc3	4959.97	2.03563	0.438103	4.64647	3.38e-06	5.87e-05
bphl	192.19	4.36517	0.939879	4.6444	3.41e-06	5.92e-05
si:dkey-11d18.4	77.4217	11.6149	2.50291	4.64056	3.47e-06	6.02e-05
dicp1.1__1	534.527	-3.85523	0.831632	-4.63573	3.56e-06	6.16e-05
msmo1	136.96	-9.9044	2.13741	-4.63384	3.59e-06	6.21e-05
hs3st2	66.4115	11.3937	2.45903	4.63341	3.6e-06	6.21e-05
arfgef3	496.13	3.09273	0.667693	4.63196	3.62e-06	6.25e-05
atp10d	3599.7	2.97925	0.643495	4.6298	3.66e-06	6.3e-05
epha7	113.373	-10.7221	2.31676	-4.62807	3.69e-06	6.35e-05
CT030188.1	392.119	-3.4453	0.744587	-4.62713	3.71e-06	6.37e-05
ntng2a	415.92	6.62516	1.43197	4.62661	3.72e-06	6.37e-05
CABZ01041494.1	1265.79	-3.8414	0.830639	-4.62463	3.75e-06	6.43e-05
pawr	111.225	-8.96249	1.93886	-4.62256	3.79e-06	6.48e-05
pllp	112.204	-8.97218	1.94131	-4.62172	3.81e-06	6.5e-05
scn2b	359.993	9.15964	1.9828	4.61954	3.85e-06	6.56e-05
erbin	3405.79	1.68187	0.364481	4.61442	3.94e-06	6.71e-05
erg	72.3055	-9.47223	2.05427	-4.61099	4.01e-06	6.82e-05
rabgap1l	2475.53	2.46749	0.535182	4.61057	4.02e-06	6.82e-05
ccser1	890.509	3.04575	0.660719	4.60975	4.03e-06	6.84e-05
sash1a	2248.26	2.15279	0.467196	4.6079	4.07e-06	6.89e-05
ncam1b	121.413	6.0923	1.32267	4.60605	4.1e-06	6.94e-05
hdlbpa	1971.9	-1.90336	0.414106	-4.5963	4.3e-06	7.27e-05
si:ch73-217b7.1	55.9409	8.11904	1.76706	4.59465	4.33e-06	7.31e-05
inpp5b	1425.31	-2.24358	0.488814	-4.58985	4.44e-06	7.47e-05
dock6	1550.09	1.86372	0.406573	4.58398	4.56e-06	7.68e-05
si:ch73-347e22.4	232.177	-4.71185	1.02821	-4.5826	4.59e-06	7.72e-05
bend3	123.401	-5.26423	1.1491	-4.58117	4.62e-06	7.76e-05
acss2l	125.43	7.07038	1.54343	4.58096	4.63e-06	7.76e-05
mtus1b	117.999	-9.92205	2.16632	-4.58014	4.65e-06	7.78e-05
lingo4b	59.9937	7.47059	1.63158	4.57874	4.68e-06	7.82e-05
orai1a	341.489	3.44455	0.753136	4.57361	4.79e-06	8e-05
g3bp2	87.4264	5.731	1.25332	4.57266	4.82e-06	8.03e-05
igsf9ba	2760.31	-1.82309	0.39887	-4.57063	4.86e-06	8.1e-05
si:cabz01036022.1	50.8289	10.9969	2.40695	4.56882	4.9e-06	8.15e-05
zgc:153733	794.992	2.28086	0.499869	4.56292	5.04e-06	8.38e-05
TSC22D3	108.021	-9.85931	2.16144	-4.56145	5.08e-06	8.42e-05
chst7	1487.87	2.10605	0.463955	4.53933	5.64e-06	9.35e-05
si:ch211-220f16.2	1349.7	2.0176	0.444975	4.5342	5.78e-06	9.56e-05
tram2	97.4449	-8.59547	1.89751	-4.52987	5.9e-06	9.75e-05
desi2	1503.7	2.16271	0.477835	4.52606	6.01e-06	9.91e-05
si:dkey-195m11.11	73.2735	-7.08862	1.56728	-4.52288	6.1e-06	0.000100501
pepd	848.533	-3.31093	0.73214	-4.52226	6.12e-06	0.000100665
znrf3	272.815	2.91893	0.645697	4.52058	6.17e-06	0.000101333
egr3	1404.31	-4.11544	0.910974	-4.51762	6.25e-06	0.000102624
cdh2	205.345	4.4801	0.992069	4.51592	6.3e-06	0.000103321
slc8a4b	2326.23	3.14171	0.696821	4.50864	6.52e-06	0.000106791
atp6v1aa	732.663	-2.41658	0.537153	-4.49888	6.83e-06	0.000111668
eef2b	15274.1	-1.83446	0.408016	-4.49605	6.92e-06	0.000112934
st3gal3a	2034.68	2.18705	0.486451	4.49593	6.93e-06	0.000112934
gda	107.787	-9.64593	2.14699	-4.49277	7.03e-06	0.000114474
aldoaa	1409.16	-2.72254	0.606219	-4.49102	7.09e-06	0.000115269
si:ch211-112c15.8	108.478	12.1017	2.69569	4.48926	7.15e-06	0.000116074
zbtb46	548.677	-4.45117	0.992142	-4.48642	7.24e-06	0.000117482
fhod1	1910.56	-6.27071	1.39803	-4.48539	7.28e-06	0.000117747
fabp11a	591.13	-3.29538	0.734649	-4.48566	7.27e-06	0.000117747
si:dkeyp-80d11.1	118.355	4.85928	1.08467	4.47998	7.47e-06	0.00012062
MGARP	354.605	-3.22914	0.720873	-4.47949	7.48e-06	0.000120701
spaca4l	70.5694	8.03618	1.79408	4.47928	7.49e-06	0.000120701
wdr41	595.528	2.44195	0.545436	4.47705	7.57e-06	0.000121813
LO018564.1	1457.68	1.77146	0.395809	4.47554	7.62e-06	0.000122525
gpc5a	134.754	-11.0454	2.46815	-4.47518	7.63e-06	0.000122573
slc36a1	676.183	-2.69963	0.603374	-4.47422	7.67e-06	0.00012297
f11r.1	258.671	-5.15431	1.15329	-4.46923	7.85e-06	0.000125711
bin2b	1582.49	-1.82208	0.407734	-4.4688	7.87e-06	0.000125805
zgc:103510	184.19	3.66261	0.82	4.4666	7.95e-06	0.000126945
rhcga	70.4243	10.0275	2.24562	4.46534	7.99e-06	0.00012753
slc15a2	106.767	-9.94141	2.23355	-4.45095	8.55e-06	0.000136039
pxna	741.926	6.58106	1.47854	4.45104	8.55e-06	0.000136039
grid2	602.753	8.29647	1.86559	4.44711	8.7e-06	0.000138318
igf1ra	96.0716	-8.83408	1.9873	-4.44526	8.78e-06	0.00013934
itgb5	1759.26	-2.77514	0.624718	-4.44223	8.9e-06	0.000140974
rab5aa	4554.21	1.65368	0.372265	4.44221	8.9e-06	0.000140974
fthl27__1	1044.61	-2.7974	0.63058	-4.43623	9.15e-06	0.000144763
fmnl1a	7201.02	1.72094	0.388215	4.43295	9.3e-06	0.000146802
man1a2	4619.82	1.85013	0.417576	4.43064	9.4e-06	0.000148198
rps6ka5	2072.14	2.36832	0.534665	4.42954	9.44e-06	0.000148768
slc4a11	486.517	6.83581	1.54347	4.42885	9.47e-06	0.000149058
qki2	1520.7	-3.62529	0.819618	-4.42315	9.73e-06	0.00015286
lamp1a	357.632	-3.14244	0.71091	-4.4203	9.86e-06	0.000154694
CU571315.1	111.208	-9.49596	2.15041	-4.41589	1.01e-05	0.000157688
her6	195.984	-9.15948	2.07554	-4.41307	1.02e-05	0.000159559
ccr2__1	342.555	-4.73855	1.07405	-4.41186	1.02e-05	0.000160254
ptprsa__1	528.393	6.05206	1.37229	4.41018	1.03e-05	0.000161297
rnf19a	1518.06	-1.73002	0.392648	-4.40603	1.05e-05	0.000164214
slc31a1	1324.58	-2.08411	0.47307	-4.40551	1.06e-05	0.000164408
PDE3B	756.342	2.63487	0.598257	4.40424	1.06e-05	0.000165172
aspm	144.293	-8.96967	2.03897	-4.39912	1.09e-05	0.000168907
timp2b	68.4044	-8.70767	1.97968	-4.39852	1.09e-05	0.000169161
cadm2a	214.84	6.32277	1.43756	4.39826	1.09e-05	0.000169161
kcnk1b	332.824	6.83442	1.55841	4.38551	1.16e-05	0.000179158
scinla	107.874	-10.4599	2.38702	-4.38198	1.18e-05	0.000181859
mylipb	517.63	4.46741	1.02069	4.37687	1.2e-05	0.000185951
si:ch211-234h8.7	64.8462	11.3592	2.59658	4.37467	1.22e-05	0.000187601
si:dkey-118j18.2	3048.05	2.01611	0.461087	4.37251	1.23e-05	0.000189241
inhbb	767.959	-7.29782	1.66923	-4.37198	1.23e-05	0.000189471
snrkb	989.87	-6.33167	1.44935	-4.36863	1.25e-05	0.000192163
si:dkey-33i11.9	1416.93	3.02376	0.692735	4.36497	1.27e-05	0.000195173
mrtfaa	3776.31	2.21304	0.507283	4.36253	1.29e-05	0.000197121
smpdl3a	288.323	-3.65987	0.839992	-4.35702	1.32e-05	0.000201897
rpl26__1	964.504	-2.05703	0.472202	-4.35624	1.32e-05	0.000202375
plekhj1	452.695	2.26291	0.519622	4.35491	1.33e-05	0.000203362
si:cabz01074946.1	560.149	-2.98545	0.68585	-4.35291	1.34e-05	0.000204974
il22	312.452	7.44709	1.71169	4.35072	1.36e-05	0.000206787
prr5a	339.127	-4.76455	1.09599	-4.34727	1.38e-05	0.000209814
si:ch211-214p13.9	71.5444	-8.8307	2.03157	-4.34673	1.38e-05	0.000209874
si:ch73-226l13.2	97.2054	5.41309	1.24534	4.34667	1.38e-05	0.000209874
tbc1d2b	1557.84	2.97445	0.684415	4.34597	1.39e-05	0.000210291
vat1	3331.68	-4.2719	0.984738	-4.33811	1.44e-05	0.000217693
card11	3558.85	2.03881	0.470319	4.33495	1.46e-05	0.000220576
fxyd1	67.9611	-8.50702	1.96264	-4.33448	1.46e-05	0.000220786
mcf2l2	1133.29	-4.48326	1.03529	-4.33043	1.49e-05	0.000224615
pdgfrb	758.714	-3.88008	0.896119	-4.32987	1.49e-05	0.000224924
sorl1	506.537	3.11258	0.719271	4.32741	1.51e-05	0.00022717
ptafr	70.8741	-8.73509	2.02026	-4.32374	1.53e-05	0.000230717
abhd12	3633.61	-2.26661	0.524688	-4.31992	1.56e-05	0.000234467
lmnb1	703.563	-2.35957	0.546533	-4.31735	1.58e-05	0.000236928
nsmfb	188.213	6.66186	1.54339	4.31639	1.59e-05	0.00023768
chst15	308.321	-5.92733	1.37406	-4.31374	1.61e-05	0.000240255
fkbp1ab	87.3709	-8.82995	2.05115	-4.30488	1.67e-05	0.000249777
si:dkey-23k10.3	104.977	-6.72427	1.56311	-4.30186	1.69e-05	0.00025291
acp5b	98.5518	10.305	2.39648	4.30004	1.71e-05	0.000254695
eef1b2	2190.17	-1.56046	0.363432	-4.29367	1.76e-05	0.000261809
spns2	183.867	-6.75761	1.57482	-4.29102	1.78e-05	0.000264636
mpeg1.2	43.186	-9.48491	2.21263	-4.28672	1.81e-05	0.000269493
epb41l3b	1250.66	-3.19854	0.746277	-4.28599	1.82e-05	0.000270058
iqgap2	415.822	-2.41355	0.564021	-4.27918	1.88e-05	0.000278134
fam57ba	198.044	3.61754	0.848324	4.26434	2e-05	0.000296923
si:dkey-102c8.2__1	815.825	3.53208	0.829683	4.25714	2.07e-05	0.00030628
tfec	605.434	-3.02307	0.710313	-4.25596	2.08e-05	0.000307539
adh5	178.168	-3.43749	0.807883	-4.25494	2.09e-05	0.000308593
acap3a	195.787	4.89321	1.15053	4.25301	2.11e-05	0.000310898
nsl1	55.6536	11.1388	2.62395	4.24503	2.19e-05	0.000321798
si:ch211-165i18.2	145.653	-11.0479	2.60459	-4.24168	2.22e-05	0.000326258
smc6	1216.48	2.23934	0.528472	4.23739	2.26e-05	0.000332161
cttnbp2nlb	177.728	7.48043	1.76667	4.23421	2.29e-05	0.000336509
si:ch73-27e22.4	143.594	7.6203	1.80085	4.23151	2.32e-05	0.000340175
crhr1	248.958	6.91514	1.63671	4.22503	2.39e-05	0.000349701
mpeg1.1	30394.2	1.77591	0.421595	4.21236	2.53e-05	0.000369056
gab2	75.7715	5.4698	1.29845	4.21258	2.52e-05	0.000369056
si:dkey-111e8.5	171.905	3.42999	0.816072	4.20305	2.63e-05	0.000384135
celf2	3519.21	1.63946	0.39017	4.2019	2.65e-05	0.000385644
top1l	4814.91	1.5704	0.373999	4.19894	2.68e-05	0.00039027
mao	961.773	4.45913	1.06353	4.19275	2.76e-05	0.000400609
sinup	81.2156	-8.25269	1.97089	-4.18729	2.82e-05	0.000409895
cd226	91.9991	5.72769	1.37016	4.18031	2.91e-05	0.000422197
fam234a	125.908	-3.97833	0.952358	-4.17735	2.95e-05	0.000427232
SH2D3A	55.7404	11.1409	2.66982	4.1729	3.01e-05	0.000435175
gpam	2223.47	2.52987	0.607255	4.16607	3.1e-05	0.000447886
si:ch211-66k16.2	343.808	3.16992	0.762374	4.15796	3.21e-05	0.000463558
CT025651.1	95.0047	-7.56333	1.82229	-4.15045	3.32e-05	0.00047849
gapvd1	2539.82	2.25382	0.543115	4.1498	3.33e-05	0.000479078
cnksr3	112.923	5.44167	1.31136	4.14964	3.33e-05	0.000479078
CABZ01029422.1	40.2881	10.6587	2.57104	4.14568	3.39e-05	0.000486875
tns3.1	490.678	-5.15933	1.24636	-4.13952	3.48e-05	0.000499585
mical3a__1	362.652	6.44942	1.55909	4.13665	3.52e-05	0.000505278
dapp1	1117.18	3.93812	0.953886	4.1285	3.65e-05	0.00052293
hcar1-4	386.671	4.27642	1.03633	4.12651	3.68e-05	0.000526877
washc4	1297.25	-1.73516	0.420635	-4.1251	3.71e-05	0.00052902
fut9b	351.717	3.34443	0.810761	4.12506	3.71e-05	0.00052902
acp2	501.939	-3.50442	0.849671	-4.12444	3.72e-05	0.000529827
tfcp2l1	104.97	5.36139	1.30076	4.12174	3.76e-05	0.000535491
plekho2	7680.63	1.92052	0.466143	4.12003	3.79e-05	0.000538869
sgk2b	50.3548	-9.26321	2.24868	-4.11939	3.8e-05	0.00053974
uacaa	729.132	6.69337	1.62603	4.11639	3.85e-05	0.000545589
ripk4	56.3906	11.1576	2.71036	4.11665	3.84e-05	0.000545589
pacs1a	727.466	4.34424	1.05578	4.11471	3.88e-05	0.000548967
mapkapk3	55.1743	-6.51177	1.58473	-4.10908	3.97e-05	0.000561882
msi2b	247.007	2.6369	0.642223	4.1059	4.03e-05	0.000569037
ccl34b.8	89.9441	-10.4326	2.54147	-4.10494	4.04e-05	0.000570766
ccl34a.3	94.3815	-10.6299	2.59009	-4.10404	4.06e-05	0.000571704
sema4c	89.3082	11.8209	2.88025	4.10413	4.06e-05	0.000571704
swap70a	366.235	6.95108	1.69394	4.10349	4.07e-05	0.000572423
sav1	162.355	-10.1563	2.48719	-4.08342	4.44e-05	0.000623515
plk3	642.549	2.60871	0.639118	4.08173	4.47e-05	0.000627357
map2	188.794	5.9878	1.4671	4.08139	4.48e-05	0.000627583
drp2	134.9	6.09398	1.49342	4.08055	4.49e-05	0.00062915
inpp4ab	2813.04	1.77176	0.434876	4.07418	4.62e-05	0.000645911
msi2a	480.855	5.61544	1.37865	4.07315	4.64e-05	0.000648066
mfsd11	203.623	-3.06071	0.75201	-4.07004	4.7e-05	0.000655748
ms4a17a.10__2	4899.76	-2.03865	0.50091	-4.06989	4.7e-05	0.000655748
ATP9A	213.049	3.10884	0.764393	4.06707	4.76e-05	0.000662977
eml3	650.718	2.6958	0.663536	4.06277	4.85e-05	0.000674566
tubb4b	3602.01	-1.6854	0.414898	-4.06221	4.86e-05	0.000675466
hdac9b	1544.81	-3.98024	0.980184	-4.06071	4.89e-05	0.000678012
scrib	3483.82	2.2256	0.548103	4.06056	4.9e-05	0.000678012
ccl38.1	179.432	2.77908	0.684333	4.06101	4.89e-05	0.000678012
tcima	13124.7	-1.62297	0.401083	-4.04646	5.2e-05	0.000719349
CABZ01099847.1	82.8055	5.10498	1.26178	4.04586	5.21e-05	0.000720408
zgc:77650	935.308	2.06071	0.509715	4.04287	5.28e-05	0.00072886
phf21aa	52.2815	11.0486	2.73484	4.03995	5.35e-05	0.000737192
bcl7ba	112.949	-4.8809	1.21048	-4.03221	5.53e-05	0.000761071
galnt18b	187.382	6.32413	1.5711	4.02528	5.69e-05	0.000782974
kat6b	4071.44	2.39988	0.596473	4.02345	5.74e-05	0.000788217
MPRIP	992.38	-1.68686	0.419359	-4.02247	5.76e-05	0.000790657
CU182107.2	86.6344	-4.02792	1.00155	-4.0217	5.78e-05	0.000792374
CABZ01088134.1	49.6008	-7.28195	1.81138	-4.0201	5.82e-05	0.000796447
trim33l	1418.03	2.27633	0.566254	4.01998	5.82e-05	0.000796447
fam114a1	83.5881	-5.84505	1.45596	-4.01457	5.96e-05	0.000814076
si:ch211-222l21.1	342.133	3.61456	0.900512	4.01389	5.97e-05	0.000815511
map4k3a	1241.06	2.02668	0.505016	4.01311	5.99e-05	0.000817351
il4	49.8944	10.9458	2.72919	4.01064	6.06e-05	0.000825031
slc4a2b	1448	-5.0724	1.26564	-4.00777	6.13e-05	0.000834237
CABZ01068244.1	31.5677	9.68523	2.41748	4.00633	6.17e-05	0.000838434
rgs19	1136.1	-1.69934	0.424468	-4.00347	6.24e-05	0.000847724
si:ch211-286b4.4	12002.3	-3.04672	0.762039	-3.99811	6.39e-05	0.000864342
tcf3b	517.868	-2.34642	0.586852	-3.99832	6.38e-05	0.000864342
asmtl	358.731	3.35838	0.839901	3.99854	6.37e-05	0.000864342
gsdmea	1373.13	2.29883	0.575635	3.99355	6.51e-05	0.000880207
kcnk4a	56.0594	11.1491	2.79196	3.99328	6.52e-05	0.000880241
smcr8b	1245.32	4.6889	1.17445	3.99243	6.54e-05	0.000882483
osbpl10b	46.0626	-8.90993	2.23223	-3.99149	6.57e-05	0.000885035
ptx4	439.161	-5.06901	1.27117	-3.98769	6.67e-05	0.000897491
cd2ap	4705.55	-1.39804	0.350591	-3.98767	6.67e-05	0.000897491
dyrk4	44.491	-9.06162	2.27325	-3.9862	6.71e-05	0.000901123
rbm47	6818.48	1.30959	0.328523	3.98629	6.71e-05	0.000901123
smox	9550.19	-1.514	0.37988	-3.98548	6.73e-05	0.000902921
mapk1	999.543	-3.17342	0.796344	-3.98498	6.75e-05	0.000903844
scgn	60.6543	7.78198	1.95572	3.97909	6.92e-05	0.000925556
si:dkey-13n15.11	74.1876	-10.2294	2.57442	-3.97349	7.08e-05	0.000946577
tlr2	716.141	5.21298	1.31307	3.97006	7.19e-05	0.000959288
zfhx4	475.428	-4.13259	1.04294	-3.96242	7.42e-05	0.000989468
irs2a	1063.56	-3.1357	0.792158	-3.95843	7.54e-05	0.00100508
dkk3b	69.1631	-8.72989	2.20576	-3.95777	7.57e-05	0.00100682
b4galnt1a	1915.58	2.25592	0.570161	3.95664	7.6e-05	0.00101052
BX323022.1	2423.11	2.73052	0.690239	3.9559	7.62e-05	0.00101258
si:ch211-250k18.6	88.2232	9.19326	2.32434	3.95522	7.65e-05	0.00101441
samsn1b	46.3185	9.42489	2.3835	3.95422	7.68e-05	0.00101757
tnfrsfa	1200.92	-5.27965	1.33541	-3.95357	7.7e-05	0.00101926
pth1ra	94.5649	-8.48032	2.15013	-3.9441	8.01e-05	0.00105928
si:dkey-262k9.2	736.375	6.41848	1.62765	3.9434	8.03e-05	0.00106128
p2rx4a	72.564	6.06734	1.53971	3.94057	8.13e-05	0.00107275
oga	1803.19	2.00533	0.508944	3.94019	8.14e-05	0.00107333
armc4	60.9965	11.2708	2.8637	3.93575	8.29e-05	0.00109222
kbtbd11	80.755	-7.44363	1.89437	-3.92933	8.52e-05	0.0011206
LO018106.1	1091.2	1.82913	0.465595	3.9286	8.54e-05	0.00112288
si:dkey-1c7.1	277.327	2.83001	0.720489	3.9279	8.57e-05	0.00112495
mafaa	136.961	-9.14886	2.33107	-3.92474	8.68e-05	0.00113864
parp6b	110.7	-8.79496	2.24118	-3.92424	8.7e-05	0.00113981
abch1	482.978	3.71109	0.945912	3.9233	8.73e-05	0.00114312
si:zfos-2326c3.2	1378.08	-2.07721	0.529554	-3.92258	8.76e-05	0.00114535
ctss1	86.5348	8.10844	2.06768	3.92152	8.8e-05	0.00114919
klf7a	82.6461	4.7096	1.20374	3.91248	9.14e-05	0.00119063
traf3ip2l	82.3136	9.24029	2.36171	3.91254	9.13e-05	0.00119063
selenon	258.143	-2.4046	0.614896	-3.91057	9.21e-05	0.0011988
il1b	1034.79	-4.47833	1.1456	-3.90915	9.26e-05	0.00120467
fosl2	1831.66	-2.02993	0.519313	-3.90888	9.27e-05	0.00120474
ahr2	5747.41	-1.57864	0.404006	-3.90747	9.33e-05	0.00121058
mboat2b	490.561	3.66973	0.941414	3.89811	9.69e-05	0.00125701
p2ry11	479.945	2.28985	0.58754	3.89735	9.73e-05	0.00125968
si:ch211-253b8.5	59.1754	-8.86663	2.27912	-3.89038	0.000100088	0.00129508
cep170b	339.343	3.9153	1.00656	3.88977	0.00010034	0.00129701
mgat1b	1255.89	-2.43831	0.626939	-3.88923	0.000100561	0.00129854
plcd4b	64.657	-9.17358	2.35926	-3.88834	0.000100934	0.00130202
gpr171	46.4042	10.8765	2.80088	3.88324	0.000103076	0.00132828
cfp	935.576	-2.09351	0.539797	-3.87832	0.000105181	0.00135403
bach2a	139.992	5.73589	1.47911	3.87793	0.000105349	0.00135481
cxcr4b	1317.24	-3.00397	0.774737	-3.8774	0.000105577	0.00135498
si:ch73-109i22.2	177.19	5.03958	1.29971	3.87746	0.000105551	0.00135498
tpm3	3047.47	1.42838	0.368418	3.87705	0.000105729	0.00135555
znf516	187.422	-5.32753	1.37475	-3.87528	0.000106503	0.00136408
cnn3a	715.74	6.83957	1.76565	3.87367	0.000107208	0.00137171
gramd4b	1198.68	2.05099	0.529552	3.87307	0.000107474	0.00137372
sept9b	2759.42	-1.89005	0.488219	-3.87132	0.000108249	0.00138085
slc9a3r1a	1238.41	2.92748	0.756198	3.87131	0.000108251	0.00138085
si:ch73-31d8.2	46.1319	-7.87327	2.03393	-3.87096	0.000108407	0.00138145
pfn1	13292.3	1.43926	0.37274	3.86129	0.00011279	0.00143585
nrd1a	656.07	2.49591	0.646494	3.86069	0.000113069	0.00143794
tns3.2	625.58	-4.64824	1.20432	-3.85964	0.000113555	0.00144268
btk	1621.51	1.62384	0.421096	3.85621	0.000115158	0.00146157
cfbl	167.421	5.78325	1.50081	3.85342	0.000116481	0.00147688
si:dkey-182g1.10	110.916	7.48811	1.94364	3.85262	0.00011686	0.00148019
chchd4a	66.7516	-8.64346	2.24662	-3.84733	0.000119414	0.00151101
arhgef7b	462.232	-2.24942	0.585134	-3.84428	0.000120907	0.00152837
si:busm1-160c18.6	103.972	6.91209	1.79918	3.8418	0.000122134	0.00154234
tmem131l	3892	1.52574	0.397413	3.83919	0.000123443	0.00155731
si:ch211-281g13.5	232.924	-10.2195	2.66325	-3.83722	0.000124434	0.00156825
si:dkey-120c6.5	40.4001	-8.46481	2.20771	-3.8342	0.000125976	0.00158609
mafa	1040.71	-3.75088	0.978714	-3.83246	0.000126868	0.00159573
si:dkeyp-44a8.4	33.8375	10.4077	2.71697	3.83065	0.000127805	0.00160591
cmklr1	9225.25	-2.05312	0.536116	-3.82963	0.000128336	0.00161097
carmil2	166.773	6.06646	1.58433	3.82905	0.000128641	0.00161319
CR387919.1	35.5902	10.3133	2.69426	3.82786	0.000129261	0.00161937
si:dkey-82k12.13	120.76	-10.5004	2.74519	-3.82501	0.000130769	0.00163597
OTUD7A	433.977	4.52682	1.18353	3.82486	0.000130846	0.00163597
evpla	66.9087	4.8497	1.26866	3.82268	0.000132007	0.00164885
arl5c	3047.36	2.32582	0.608662	3.8212	0.000132804	0.00165716
ugt5f1	451.564	-3.44841	0.902725	-3.82001	0.000133449	0.00166355
slc8a2a	120.075	3.93349	1.03062	3.81662	0.000135291	0.00168485
arrdc2	2368.14	-3.1866	0.835645	-3.81333	0.000137105	0.00170576
ryr1b	602.391	6.38677	1.67552	3.81182	0.000137949	0.00171457
usp54b	156.89	4.88202	1.28127	3.8103	0.000138798	0.00172341
plxnd1	1785.4	-5.34252	1.40227	-3.80992	0.000139014	0.0017244
tpra1	363.088	-2.58367	0.678227	-3.80945	0.000139275	0.00172594
erbb2	80.7014	-9.1504	2.40357	-3.807	0.000140663	0.00173972
si:dkeyp-19e1.3	1406.16	2.14259	0.562773	3.80721	0.000140543	0.00173972
fam208aa	665.473	1.9177	0.50414	3.8039	0.000142437	0.00175994
CABZ01061591.1	447.132	-5.21188	1.37068	-3.80241	0.000143295	0.00176881
si:dkey-7i4.24	56.9446	-9.91753	2.60971	-3.80024	0.000144555	0.00178261
si:dkey-4c23.4	160.313	-5.57987	1.46844	-3.79986	0.000144776	0.00178359
mbnl1	4090.56	1.7386	0.457772	3.79795	0.0001459	0.00179354
nme2b.2	92.3702	6.05869	1.59533	3.79776	0.000146011	0.00179354
scin	179.313	9.28359	2.44437	3.79794	0.000145901	0.00179354
snx5	583.504	-2.7635	0.728108	-3.79545	0.000147376	0.00180856
zgc:152791	93.8283	-9.06068	2.38845	-3.79353	0.000148519	0.00182081
itga3a	186.523	8.09374	2.13548	3.79013	0.000150567	0.00184412
nrros	2533.74	-1.48	0.390512	-3.78988	0.000150719	0.00184419
tspan36	3147.65	-1.88893	0.498539	-3.78893	0.000151299	0.00184949
gna15.1	48.8384	10.9504	2.89087	3.78791	0.000151921	0.00185529
tle3a	816.495	1.9241	0.508337	3.78508	0.000153659	0.0018747
foxj3	947.136	1.72706	0.456371	3.78434	0.000154117	0.00187846
pygmb	167.112	4.29502	1.13605	3.78065	0.000156418	0.00190467
si:dkey-9k7.3	171.944	-4.01256	1.06169	-3.77941	0.000157198	0.00191233
ssh1a	3105.2	-2.23154	0.590929	-3.77633	0.000159155	0.00193426
tcea3	874.481	-2.07473	0.549696	-3.77432	0.000160445	0.00194807
ssbp3b	701.338	2.37209	0.62859	3.77368	0.000160859	0.0019509
CABZ01118575.1	76.0558	6.52652	1.72958	3.77348	0.000160988	0.0019509
CABZ01046088.1	85.1575	-7.64135	2.02646	-3.77078	0.000162736	0.00197019
fmo5	166.557	-5.54051	1.47047	-3.76785	0.000164661	0.00199158
ptprc	11654.9	1.39954	0.371679	3.76546	0.00016624	0.00200866
triob	275.932	4.36578	1.1595	3.76524	0.000166392	0.00200866
lrrk1	4063.67	1.53862	0.408888	3.76295	0.000167921	0.00202518
usp43a	67.6849	-7.13433	1.89677	-3.7613	0.000169031	0.00203662
spdl1	34.9339	-8.53147	2.26999	-3.75838	0.00017102	0.00205861
zgc:165656	1034.98	2.59539	0.691298	3.75437	0.00017378	0.00208983
hspb1	303.217	-3.69899	0.985595	-3.75306	0.000174692	0.00209567
nadka__1	112.611	-3.66529	0.976641	-3.75295	0.000174764	0.00209567
huwe1	6828.12	1.42619	0.379971	3.75341	0.000174444	0.00209567
mfsd2ab	410.859	-2.70403	0.721386	-3.74838	0.000177977	0.00213217
fut8b	36.2245	10.5073	2.80787	3.74209	0.000182499	0.00218427
bcr	1007.91	-5.85352	1.56469	-3.74101	0.00018328	0.00218946
fhl3a	636.078	-5.26404	1.40707	-3.74113	0.000183195	0.00218946
plch1	32.6632	8.90279	2.38023	3.7403	0.000183798	0.00219356
il1fma	748.018	2.78899	0.745762	3.73979	0.000184174	0.00219598
cdkn1cb	128.944	-5.42295	1.45087	-3.73772	0.000185695	0.00220994
man2a1	1473.92	1.60217	0.42865	3.73772	0.000185696	0.00220994
ehbp1	194.333	-5.27905	1.41333	-3.73517	0.000187586	0.00223033
fuca2	1701.98	-1.66296	0.445253	-3.73486	0.000187823	0.00223104
slc25a23a	1158.55	2.43381	0.652053	3.73253	0.000189564	0.0022496
mtss1la	2658.68	-5.81157	1.55789	-3.73042	0.000191164	0.00226645
ece2b	2290.4	1.43268	0.384141	3.72957	0.000191808	0.00227196
klf11a	131.737	3.61947	0.971341	3.72626	0.000194343	0.00229981
acvrl1	736.442	-4.98407	1.33878	-3.72284	0.000196996	0.00232903
lcp1	7446.7	1.91229	0.514322	3.71807	0.000200748	0.00237116
f13a1b	189.711	-5.10887	1.37676	-3.7108	0.000206604	0.00243594
tep1	386.889	2.4576	0.662286	3.71078	0.000206619	0.00243594
naga	1275.81	-1.8456	0.49743	-3.71027	0.000207038	0.0024386
prkag2a	352.851	3.17481	0.856115	3.7084	0.000208577	0.00245443
cyth4b	326.653	2.2021	0.594132	3.70642	0.000210213	0.00247138
hcls1	3227.25	1.86807	0.504872	3.70009	0.000215525	0.00253146
si:ch211-152f22.4	33.2942	10.3712	2.80475	3.69771	0.000217549	0.00255286
si:dkey-65j4.2	72.8206	10.878	2.94276	3.69652	0.000218572	0.00256247
zgc:113208	110.515	-4.10916	1.1121	-3.69497	0.000219913	0.00257581
dtx4	290.976	-3.87551	1.04906	-3.69427	0.000220523	0.00257898
ccnd2b	39.8694	6.8573	1.85624	3.69418	0.000220593	0.00257898
SLA (1 of many)	70.5542	-5.9513	1.61307	-3.68943	0.000224761	0.00262526
kel	533.604	-5.21453	1.4136	-3.68883	0.000225285	0.0026286
adam9	1131.45	-2.83114	0.767531	-3.68863	0.000225463	0.0026286
myo9b	4999.29	1.38811	0.376479	3.68708	0.000226844	0.00264225
si:ch211-213a13.5	124.328	6.82876	1.85401	3.68324	0.000230289	0.0026799
arl15b	231.738	3.62154	0.983671	3.68166	0.000231723	0.0026941
slc45a4	2912.39	-2.15301	0.586029	-3.67389	0.000238884	0.00277479
satb1b	66.7547	4.57589	1.24694	3.66969	0.000242846	0.00281823
zmp:0000001103	107.5	6.92198	1.88675	3.66874	0.000243753	0.00282614
dub	485.57	4.07787	1.11373	3.66145	0.000250788	0.00290504
tlx1	51.9566	-7.52678	2.05622	-3.6605	0.000251728	0.00291324
MYO1G	5425.26	2.23188	0.61043	3.65624	0.000255938	0.00295654
nexmifb	148.872	4.45056	1.21719	3.65643	0.000255753	0.00295654
antxr1c	353.52	-5.22657	1.43055	-3.65353	0.000258655	0.00298519
sh2b3	654.146	-2.29727	0.629086	-3.65176	0.000260447	0.00300312
si:ch211-194m7.3	146.656	-3.90121	1.06905	-3.64923	0.000263029	0.00303012
camk1da	38.9551	-9.35849	2.56563	-3.64764	0.00026466	0.00304334
si:ch211-215e19.6	618.957	5.50995	1.51049	3.64778	0.000264515	0.00304334
TOM1L2	1656.49	1.4745	0.405281	3.63821	0.000274536	0.00315117
dlx2a	89.1214	10.639	2.92418	3.63829	0.000274456	0.00315117
cables2b	193.867	6.50324	1.78848	3.63619	0.000276702	0.00317314
nedd8l	44.5068	-5.43452	1.49539	-3.63418	0.000278862	0.00319499
prps1a	482.304	-1.85335	0.510547	-3.63013	0.000283282	0.00324269
cyba	1952.6	1.85538	0.511463	3.6276	0.000286065	0.00327157
CABZ01043953.1	57.8032	-9.36862	2.58401	-3.62561	0.000288283	0.00329097
tgfb1b	1551.11	2.14764	0.592339	3.6257	0.000288175	0.00329097
arid5a	2488.87	1.44567	0.399062	3.62268	0.000291566	0.00332502
mtus1a	1439.04	3.32185	0.917009	3.62248	0.000291793	0.00332502
esyt1a	243.202	4.6793	1.29212	3.62143	0.00029298	0.00333553
radil	40.7135	10.6878	2.95223	3.62024	0.000294329	0.00334786
cebpb	7124.93	-2.90747	0.803289	-3.61945	0.000295225	0.00335503
p2ry10	85.946	5.46564	1.51122	3.6167	0.000298383	0.00338786
slc35g2a	49.4341	7.18011	1.986	3.61536	0.000299931	0.00340237
zmp:0000000912	77.7504	-10.2312	2.83202	-3.61271	0.000303016	0.00343427
tnfsf10l	179.496	-5.9171	1.6383	-3.61174	0.000304145	0.00344088
slc40a1	714.554	-3.38306	0.936683	-3.61175	0.000304139	0.00344088
dlgap2a	201.134	6.77704	1.87763	3.60936	0.000306954	0.00346954
pcgf5a	165.323	-4.84361	1.3447	-3.602	0.000315774	0.00356163
noc2l	270.776	-2.6911	0.747141	-3.60186	0.000315948	0.00356163
tlr8a	539.556	3.24572	0.901076	3.60205	0.000315723	0.00356163
si:ch211-106h4.4	507.168	-3.21858	0.893654	-3.60159	0.000316275	0.00356212
CABZ01068358.1	1527.01	-2.97733	0.826932	-3.60045	0.000317661	0.00357454
ablim3	34.6185	8.98701	2.49816	3.59745	0.000321356	0.00361289
si:dkey-24p1.1	78.3035	10.5171	2.93152	3.58759	0.000333754	0.00374893
gstp1	123.305	-4.67224	1.30334	-3.58481	0.000337318	0.00378559
thsd7ba	181.699	4.6572	1.30016	3.58204	0.000340927	0.00382269
si:ch211-48m9.1__2	39.7115	10.6517	2.9758	3.57946	0.000344306	0.00385714
LO017682.1	66.968	8.79211	2.45725	3.57803	0.00034619	0.0038748
BX784026.1	80.287	11.0685	3.0953	3.57591	0.000349012	0.00390292
ampd3b	1299.22	-2.13971	0.598577	-3.57467	0.000350674	0.00391804
plekhm2	622.422	-2.47128	0.691546	-3.57355	0.000352169	0.00392778
CR354395.1	1181.94	5.7039	1.59613	3.57358	0.000352134	0.00392778
trib2	73.0221	4.78039	1.33865	3.57104	0.00035556	0.00396209
lpar6a	729.479	-2.4857	0.696467	-3.56901	0.00035833	0.0039874
arl6ip5b	272.351	2.10325	0.589326	3.56891	0.000358464	0.0039874
glula	17084	-2.13571	0.598739	-3.56702	0.000361069	0.00401184
clcn2a	70.6622	5.00714	1.4038	3.56685	0.000361298	0.00401184
serpine1	112.858	-10.2252	2.86768	-3.56566	0.000362938	0.0040265
doc2d	36.728	10.0723	2.82814	3.56145	0.000368816	0.00408812
mboat2a	670.228	-2.73545	0.768281	-3.56048	0.00037018	0.00409963
eef1a1l1	19830.6	-1.628	0.457316	-3.55991	0.000370987	0.00410496
atp6v1ba	1369.73	-1.745	0.490843	-3.55511	0.000377818	0.00417688
si:dkey-18a10.3	1715.7	-2.95292	0.831384	-3.55182	0.000382583	0.00422585
sh3d21	56.4684	5.37017	1.51361	3.54792	0.000388287	0.0042851
FO905027.1	39.6434	10.6492	3.00565	3.54307	0.000395493	0.0043608
epdl1	1650.01	4.43704	1.25261	3.54223	0.000396753	0.00437087
metap2a	57.9785	-8.04752	2.27576	-3.53619	0.000405943	0.00446821
si:dkeyp-28d2.4	1366.52	4.8469	1.3709	3.53556	0.000406912	0.00447497
dock7	378.471	-2.95835	0.837091	-3.53409	0.000409186	0.00449606
p4ha1b	42.9954	-9.47085	2.68171	-3.53164	0.000412986	0.00453386
b3gnt3.2	219.784	7.78909	2.2064	3.53023	0.000415193	0.00455411
ssbp4	113.89	-5.44134	1.54315	-3.52612	0.000421699	0.00462145
ctnnb1	1034.04	-1.52724	0.433771	-3.52083	0.000430194	0.00470636
si:ch211-1f22.14	47.9714	10.7504	3.05327	3.52093	0.000430029	0.00470636
kif21b	6891.07	1.4765	0.419429	3.52025	0.000431137	0.00471259
GFOD1	175.159	6.71797	1.90879	3.51949	0.00043237	0.00472198
arfip2a	219.84	3.2835	0.934694	3.51292	0.000443216	0.00483624
egr1	18515.3	-2.01776	0.57448	-3.51233	0.000444196	0.00484273
bco2l	41.3437	-9.44197	2.68934	-3.51088	0.000446621	0.00486497
si:ch73-248e21.7	579.411	-4.33508	1.23527	-3.50943	0.000449074	0.00488746
tec	325.856	-4.51684	1.28765	-3.50783	0.000451775	0.00491261
nanos1	94.0255	-10.641	3.03395	-3.50731	0.000452669	0.00491809
plxnb2b	3505.2	-1.55823	0.44468	-3.50415	0.000458065	0.00497243
ak3	599.305	-3.04211	0.868686	-3.50197	0.00046183	0.00500899
si:ch73-334d15.2	51.6073	8.01698	2.29304	3.49622	0.000471894	0.00511374
tgif1	59.8072	-7.22508	2.06672	-3.49592	0.000472438	0.00511524
tspan18b	35.3778	-9.21838	2.63827	-3.4941	0.000475664	0.00514574
txnipa	17038.9	-1.90548	0.546069	-3.48945	0.00048401	0.00523154
si:dkey-21e5.1	85.2836	6.13804	1.75915	3.48922	0.000484437	0.00523167
hmgb3b	169.84	-5.81959	1.6681	-3.48876	0.000485274	0.00523623
eif3f	522.884	-2.2054	0.632216	-3.48837	0.000485977	0.00523932
gse1	1859.53	3.14601	0.902081	3.4875	0.00048756	0.0052519
LRRC75A	288.509	-3.4356	0.985512	-3.4861	0.00049011	0.00527287
si:dkey-23k10.5	324.655	-2.07999	0.596674	-3.48598	0.000490344	0.00527287
si:dkey-239i20.2	59.0087	-7.0155	2.01299	-3.48511	0.000491939	0.00528552
actn4	3438.59	1.63091	0.468433	3.48163	0.000498379	0.00535014
rps15a	3156.78	-1.63814	0.470599	-3.48097	0.000499596	0.00535864
elovl1b	1765.52	-1.81316	0.520966	-3.48038	0.000500701	0.00536593
scml2	203.524	2.66136	0.764744	3.48007	0.00050128	0.00536757
CABZ01055306.1	49.0377	-9.70184	2.79004	-3.47731	0.000506478	0.00541862
dock3	85.2096	-7.07482	2.03545	-3.47579	0.000509343	0.00544465
tnni4b.1	82.9881	-8.02535	2.30926	-3.47529	0.000510294	0.0054502
tanc2a	2594.78	1.79023	0.515166	3.47505	0.000510751	0.00545046
egr2a	402.291	-3.91083	1.12656	-3.47149	0.000517573	0.00550927
rpl4	6038.14	-1.46122	0.420879	-3.47184	0.000516907	0.00550927
nalcn	132.344	6.90474	1.98891	3.47163	0.000517312	0.00550927
apbb1ip	2877.44	-1.79242	0.516539	-3.47006	0.000520337	0.00553401
sgk494a	56.4011	-7.89775	2.27657	-3.46914	0.000522127	0.00554837
calcrlb	54.7696	-9.70102	2.80018	-3.46443	0.00053136	0.00564173
mbnl3	10108.9	1.73172	0.500047	3.46312	0.00053394	0.00566435
wdfy2	227.799	-5.8362	1.68597	-3.46163	0.000536919	0.00569116
ezh1	672.936	2.61821	0.756946	3.45891	0.000542359	0.005744
epn1	1781.3	1.4354	0.416067	3.44993	0.000560739	0.00593366
mark2b	1032.8	1.67646	0.485979	3.44965	0.000561304	0.00593466
rpl10	3739.62	-1.37017	0.397638	-3.44577	0.000569445	0.00601065
zgc:92360	56.5724	5.03943	1.46246	3.44585	0.000569261	0.00601065
foxp1a	207.306	-2.56938	0.745882	-3.44475	0.000571582	0.00602816
CABZ01066694.1	581.253	-2.36307	0.686108	-3.44416	0.000572839	0.00603637
l3mbtl3	104.317	4.25495	1.23618	3.44201	0.000577403	0.00607937
crema	1315.48	-2.90796	0.845161	-3.44072	0.000580174	0.00610345
bzw1b	2524.48	-1.54599	0.449612	-3.43849	0.00058496	0.00614866
wfikkn2b	46.2731	-9.61813	2.80018	-3.43483	0.000592936	0.00622731
tpte	450.187	-2.11056	0.614665	-3.43367	0.000595477	0.00624879
mmd	474.323	-2.96592	0.863941	-3.43301	0.000596928	0.00625881
rpl12	3563.43	-1.77441	0.516906	-3.43275	0.000597491	0.0062595
si:dkey-92f12.2	323.913	2.97128	0.865729	3.43212	0.000598891	0.00626895
mctp1b	112.55	6.0709	1.77018	3.42954	0.000604597	0.00632343
ets2	1401.18	-3.00716	0.876975	-3.42901	0.000605785	0.00632536
si:ch73-47f2.1	44.2856	10.8092	3.15209	3.42922	0.000605329	0.00632536
tmem131	5751.97	-1.46592	0.427621	-3.42807	0.000607883	0.00634201
glud1b	1024.04	-3.53429	1.03132	-3.42695	0.000610404	0.00636305
paox1	964.318	-2.361	0.689245	-3.42549	0.000613686	0.0063867
birc7	478.754	2.24283	0.654736	3.42554	0.000613571	0.0063867
f13a1a.1	72.1633	-9.95689	2.90777	-3.42424	0.000616529	0.00641099
myh11a	260.808	5.10676	1.4931	3.42025	0.000625648	0.00650044
smchd1	1038.86	1.82714	0.534612	3.41769	0.000631547	0.00655633
atp2b1b	88.7666	-9.82206	2.87451	-3.41695	0.000633273	0.00656884
FAM83G	1495.47	-2.76462	0.809226	-3.41637	0.000634615	0.00657735
atp13a2	457.671	-2.40193	0.704316	-3.41031	0.000648901	0.00671988
fam129ab	434.956	-3.20003	0.938508	-3.4097	0.000650332	0.00672917
parp4	1879.11	2.99563	0.879541	3.4059	0.000659465	0.00681463
ninl	103.654	6.85601	2.01303	3.40581	0.000659672	0.00681463
smad1	96.9501	-7.96066	2.34243	-3.39846	0.00067767	0.00699482
cdc42l	4793.48	1.22295	0.360048	3.39663	0.000682213	0.00703595
LO018597.2	407.62	4.16404	1.22689	3.39399	0.000688828	0.00709837
nt5e	60.6093	-9.78799	2.88435	-3.39348	0.0006901	0.00710566
pld1b	474.469	-5.08841	1.50162	-3.38862	0.000702441	0.00722683
ptprua	60.3146	4.67039	1.37903	3.38672	0.000707341	0.00726613
si:dkey-71b5.3	36.1899	10.5177	3.10561	3.38669	0.000707414	0.00726613
si:ch211-226m16.2	738.774	3.07514	0.909919	3.37957	0.000725984	0.00745079
tbc1d4	238.434	-4.51692	1.33678	-3.37895	0.000727639	0.0074617
rnd2	73.1451	6.75484	1.99931	3.37859	0.000728595	0.00746543
rnaseka	344.054	-2.56496	0.76002	-3.37486	0.000738529	0.00756107
tlr5b	82.2537	-9.82706	2.91506	-3.37114	0.000748579	0.00765774
ccl35.2	425.097	3.96663	1.17938	3.36331	0.000770144	0.00787196
hck	6238.23	1.45586	0.433138	3.36118	0.00077609	0.0079263
iqsec1b	4334.62	8.46973	2.52096	3.35973	0.000780193	0.00796176
srgap3	2283.14	-2.6936	0.80223	-3.35764	0.000786114	0.00800921
camk1db	436.428	1.71823	0.511731	3.35769	0.000785957	0.00800921
ugp2b	871.812	-1.79144	0.53396	-3.35501	0.00079363	0.00807925
atp13a3	1716.09	-1.52875	0.456497	-3.34886	0.000811434	0.00824718
prkar2aa	611.681	1.52666	0.455866	3.34893	0.000811254	0.00824718
ier5l	81.989	-7.88249	2.35445	-3.34791	0.000814245	0.00826908
im:7160594	116.177	-2.99286	0.894484	-3.3459	0.000820151	0.00831566
primpol	29.1886	7.09918	2.12174	3.34592	0.00082009	0.00831566
abcg2a	63.5036	-6.34854	1.89757	-3.34562	0.000820993	0.0083175
junba	6116.63	1.17362	0.351285	3.34095	0.000834927	0.00845187
mhc1lia	41.6365	-9.39681	2.81651	-3.33633	0.000848935	0.00858678
CU302436.1	39.6834	-6.05082	1.81378	-3.33603	0.000849827	0.00858891
helz2	936.996	-4.92859	1.47785	-3.33498	0.000853045	0.00861452
higd1a	824.408	-2.40978	0.722795	-3.33397	0.000856154	0.00863497
grk6	412.18	-1.82881	0.548555	-3.33388	0.00085644	0.00863497
mipol1	77.3754	7.18511	2.15765	3.33007	0.000868243	0.00874698
dock5	161.552	2.4048	0.72306	3.32586	0.000881471	0.00887314
pttg1ipa	428.574	2.34706	0.70575	3.32563	0.000882203	0.00887343
nck1a	3174.47	2.4315	0.73131	3.32485	0.000884652	0.00889096
tnfrsf11b	354.406	4.24044	1.2758	3.32374	0.000888186	0.00891937
zgc:158564	1925.49	1.50186	0.451918	3.3233	0.000889584	0.0089263
NPC2 (1 of many)	73.5644	-7.51496	2.26215	-3.32204	0.000893624	0.00895258
TMCC1	67.353	-5.72382	1.72295	-3.32211	0.000893393	0.00895258
pstpip2	1201.34	3.65555	1.10125	3.31947	0.000901886	0.00902817
inpp4aa	1800.79	1.83044	0.552164	3.31503	0.000916337	0.00916555
ftr14	86.8224	-7.28172	2.19936	-3.31084	0.000930163	0.00929646
GPR68	35.0461	10.2854	3.109	3.30827	0.000938752	0.00937487
bpifcl	972.568	2.44256	0.73906	3.30495	0.000949934	0.00947903
tmsb1	94.7943	-6.76002	2.04661	-3.30304	0.000956429	0.00953629
actb1	31256.8	1.42978	0.432947	3.30243	0.000958498	0.00954937
rps10	2938.3	-1.44511	0.43765	-3.30198	0.000960056	0.00955734
map1sa	1110.28	-2.02441	0.61317	-3.30154	0.000961552	0.00956467
b3gnt5a	114.791	-6.00671	1.81956	-3.3012	0.000962728	0.00956882
snx8a	57.708	-9.63512	2.91944	-3.30033	0.0009657	0.00958324
si:dkey-15j16.3	99.442	-8.57272	2.59738	-3.30052	0.000965058	0.00958324
arhgap29b	2848.23	1.26769	0.384197	3.29958	0.000968295	0.00960144
rps24	2236.8	-1.34309	0.407341	-3.2972	0.000976536	0.00966794
dennd2db	509.539	5.42413	1.64503	3.29728	0.000976246	0.00966794
paqr6	276.453	-4.09766	1.2431	-3.29632	0.000979598	0.00969064
fam126a	413.588	-2.88891	0.876624	-3.29549	0.000982485	0.00971158
exoc3l2b	328.347	-3.77347	1.14537	-3.29453	0.000985855	0.00973725
MFAP4 (1 of many)__3	139.973	-4.33409	1.31586	-3.29372	0.000988701	0.00975771
pnp5a	356.62	-3.31715	1.00743	-3.2927	0.000992319	0.00978575
ccdc149b	23.6278	9.87877	3.00339	3.28921	0.00100471	0.00990017
snx18a	2031.07	-1.34978	0.410736	-3.28625	0.00101532	0.00999693
slc39a14	336.383	2.51017	0.764077	3.28523	0.00101899	0.0100253
ramp2	66.6085	-9.71543	2.95804	-3.28442	0.00102193	0.0100385
rplp2	2952.3	-1.30281	0.396645	-3.28457	0.00102137	0.0100385
sox13	273.431	6.91603	2.10614	3.28375	0.00102436	0.0100545
abca3b	1580.29	-1.32066	0.402274	-3.28299	0.00102712	0.0100737
lrrc53	44.8828	-9.5741	2.91777	-3.28131	0.00103327	0.0101262
zgc:152774	1231.64	1.90769	0.582764	3.27352	0.00106219	0.0104015
phb2a	222.826	-2.59428	0.79331	-3.27019	0.00107474	0.0105162
pabpc1b	75.5013	-4.30193	1.31661	-3.26744	0.00108525	0.0106109
nktr	1875.78	1.37865	0.421976	3.26712	0.00108647	0.0106145
slc47a2.2	157.376	-9.30395	2.84935	-3.26529	0.00109353	0.0106753
gpr84	91.7291	-5.23711	1.60549	-3.26201	0.00110627	0.0107746
hspa5	2721.67	-1.89978	0.582391	-3.26203	0.00110616	0.0107746
osbpl3a	35.0212	10.2268	3.1347	3.26244	0.00110458	0.0107746
pfkfb4b	2421.03	-2.38389	0.731462	-3.25907	0.00111776	0.0108697
pik3cb	891.255	-2.37257	0.727972	-3.25914	0.00111749	0.0108697
prkcq	778.636	5.57792	1.71249	3.25721	0.00112514	0.010933
gng2	718.725	4.85505	1.49152	3.25511	0.00113348	0.0110056
sec61b	559.24	-2.22947	0.685031	-3.25456	0.0011357	0.0110186
inppl1a	421.634	-2.30038	0.706873	-3.25431	0.00113668	0.0110197
CU984600.2	1695.8	-4.46439	1.37272	-3.25222	0.00114508	0.0110926
spi1a	3790.41	-1.18848	0.365762	-3.24932	0.00115679	0.0111888
fam107b	123.293	3.77039	1.16035	3.24934	0.00115671	0.0111888
pamr1	33.3544	10.4002	3.20212	3.2479	0.0011626	0.0112364
glg1b	462.676	1.76073	0.542276	3.24692	0.0011666	0.0112664
si:dkey-58f10.12	31.2345	8.86538	2.73161	3.24548	0.00117253	0.011315
si:ch211-201h21.5	74.0146	-9.46381	2.91677	-3.24462	0.00117607	0.0113405
mfsd2aa	253.337	5.71105	1.76043	3.24413	0.00117809	0.0113513
tmem184a	195.504	3.55313	1.09542	3.24362	0.0011802	0.0113629
samsn1a	2436.48	-4.50825	1.39019	-3.24291	0.00118317	0.0113828
cemip2	264.03	-2.42202	0.74723	-3.24134	0.0011897	0.0114369
SIPA1	1418.31	1.7631	0.544245	3.23953	0.00119728	0.011501
ago-04	2485.47	1.42047	0.43932	3.23334	0.0012235	0.011735
ncaldb	110.226	4.27102	1.32091	3.23339	0.00122328	0.011735
iqsec2a	86.5767	-9.37088	2.89877	-3.23271	0.0012262	0.011752
ponzr1	222.559	-4.11572	1.27341	-3.23205	0.00122904	0.0117702
fancl	25.7411	6.20373	1.92056	3.23017	0.00123718	0.0118391
srebf1	749.941	-1.84602	0.571973	-3.22746	0.00124893	0.0119426
nfe2l2a	2858.64	-1.32487	0.410939	-3.22402	0.00126406	0.012078
zgc:162182	390.494	-3.29803	1.024	-3.22073	0.00127863	0.012208
usp2b	51.7531	-9.64325	2.99667	-3.21799	0.0012909	0.0123159
zgc:110158	128.252	-3.81475	1.18556	-3.21767	0.00129237	0.0123205
pald1a	1541.75	-1.69808	0.527802	-3.21727	0.00129417	0.0123284
brsk2b	610.19	3.6983	1.14988	3.21626	0.00129874	0.0123625
si:dkey-7i4.1	1840.57	-3.47965	1.08217	-3.21545	0.0013024	0.012388
aldh3a1	566.044	-4.50533	1.40124	-3.21523	0.00130338	0.012388
eif5a	3019.51	-1.33824	0.416338	-3.2143	0.00130762	0.0124125
si:ch211-156p11.1__1	29.3455	10.0581	3.12922	3.21424	0.00130792	0.0124125
tnfrsf18	132.727	3.3729	1.04978	3.21297	0.00131371	0.012458
washc2c	2257.26	-1.82992	0.569657	-3.21231	0.00131671	0.012477
rgn	408.169	-4.19759	1.308	-3.20917	0.00133119	0.0126048
phf1	32.701	10.3715	3.23558	3.20544	0.00134856	0.0127597
cited4b	1677.29	1.89664	0.592063	3.20344	0.00135798	0.0128392
cdh11	138.208	5.5711	1.74048	3.2009	0.00137	0.0129431
slc7a10a	86.1735	4.10379	1.28234	3.20022	0.00137321	0.0129637
alox5a	381.51	-3.96913	1.24041	-3.19986	0.00137496	0.0129705
C3AR1	21.3325	-8.43211	2.63536	-3.1996	0.00137619	0.0129724
mhc1zba	13755.2	1.31129	0.409966	3.19853	0.00138132	0.013011
ube2e2	1499.36	1.5949	0.498671	3.19831	0.00138235	0.013011
rpl7	2667.22	-1.5784	0.493773	-3.19661	0.00139052	0.0130781
ppfibp1b	86.8669	-9.37319	2.9331	-3.19566	0.00139514	0.013102
ptger4b	311.742	-2.68526	0.840242	-3.19582	0.00139435	0.013102
abcc5	21838.8	-1.82508	0.571611	-3.19288	0.00140864	0.0132189
cc2d1b	883.781	-1.73701	0.544304	-3.19125	0.00141661	0.0132839
syngr1b	31.6918	10.3263	3.23693	3.19015	0.001422	0.0133245
gnptab	731.165	-1.62936	0.510812	-3.18974	0.00142401	0.0133334
lygl1	2008.09	1.75521	0.55047	3.18857	0.00142976	0.0133773
rb1	266.565	2.88329	0.904999	3.18595	0.00144278	0.0134891
cfhl2	22.604	9.81952	3.08427	3.18374	0.00145383	0.0135824
CR450686.1	31.5986	10.322	3.24309	3.18278	0.00145871	0.0136178
CU856539.2	31.9975	-7.63922	2.40091	-3.1818	0.00146363	0.0136537
atp8a1	3181.45	1.1444	0.359748	3.18112	0.00146709	0.0136758
aifm2	139.374	-3.04849	0.95923	-3.17806	0.00148266	0.0137802
per2	2841.05	-2.34639	0.738219	-3.17845	0.00148063	0.0137802
pdlim1	171.898	5.48316	1.72528	3.17814	0.00148226	0.0137802
fancd2	55.4095	8.81923	2.7747	3.17844	0.00148068	0.0137802
npas4a	50.4485	7.22274	2.27369	3.17665	0.00148985	0.0138368
si:ch211-135n15.2	22.9598	9.83653	3.09833	3.17478	0.00149948	0.013916
wsb1	4020.78	-1.45992	0.459979	-3.17388	0.00150413	0.0139489
slc39a10	31.2061	-7.60254	2.39687	-3.17186	0.00151465	0.0140361
idh2	440.153	-2.08394	0.657064	-3.17159	0.00151607	0.014039
st8sia4	499.302	-2.65184	0.83687	-3.16876	0.00153093	0.0141662
rps5	2887.75	-1.66161	0.524926	-3.16543	0.00154857	0.0143188
pacsin1b	31.1022	10.2992	3.25701	3.16217	0.00156599	0.0144693
tmem86a	361.17	-3.36423	1.06412	-3.16151	0.00156951	0.0144912
ifit12	39.7183	-9.39776	2.97427	-3.15968	0.00157941	0.014572
gramd2aa	102.929	6.50484	2.05936	3.15867	0.00158492	0.0146121
il13ra1	61.9076	-9.58395	3.03513	-3.15768	0.00159032	0.0146405
rnf152	44.0424	5.14282	1.62864	3.15774	0.00158998	0.0146405
zmp:0000000608	94.5483	4.42586	1.40176	3.15735	0.00159209	0.014646
sc:d217	904.167	1.46162	0.463017	3.15674	0.00159542	0.014666
slc7a6	177.766	4.16249	1.32021	3.15291	0.00161654	0.0148493
mdga2a	140.258	6.40231	2.03084	3.15255	0.00161853	0.0148567
ptprt__1	50.4922	-9.47623	3.00641	-3.15201	0.00162149	0.0148731
si:dkey-193b15.5	82.5843	3.92985	1.24785	3.14929	0.00163667	0.0150015
rack1	3583.49	-1.57252	0.499436	-3.1486	0.00164055	0.0150261
ipo8	736.703	1.49132	0.47394	3.14665	0.00165154	0.0151157
tamm41	78.9606	-8.02851	2.55202	-3.14595	0.00165549	0.0151409
dnase2b	858.517	-1.48029	0.470647	-3.14523	0.00165958	0.0151673
FO704661.1	46.9577	-5.76379	1.83326	-3.14401	0.00166651	0.0152195
flna	405.209	-3.74944	1.1931	-3.1426	0.00167453	0.0152817
nagpa	721.398	-1.88968	0.601711	-3.14051	0.00168654	0.0153802
CABZ01053221.1	1065.84	1.84706	0.588668	3.13769	0.00170286	0.0155178
eif4ebp1	1124.37	-1.84293	0.587864	-3.13496	0.00171879	0.0156517
afdna	413.638	-1.88413	0.601141	-3.13425	0.00172295	0.0156782
si:ch73-343l4.2	31.1615	-7.78436	2.48507	-3.13245	0.00173354	0.0157632
krt18b	3669.21	2.2161	0.708954	3.12587	0.00177282	0.0161087
si:dkey-27h10.2	8719.34	-1.75039	0.560455	-3.12315	0.00178926	0.0162464
si:dkeyp-50d11.2	761.13	14.9119	4.78477	3.11653	0.00182996	0.016604
rnf144b	239.382	-4.18552	1.34607	-3.10944	0.00187441	0.0169951
ror2	113.392	-6.84961	2.20334	-3.10874	0.00187886	0.0170232
ano5a	83.9264	5.88984	1.89596	3.10652	0.00189303	0.0171393
tenm3	270.018	-2.92382	0.941615	-3.10511	0.00190208	0.0172088
dusp1	7685.31	1.66956	0.538312	3.10147	0.00192564	0.0174095
znf704	202.64	-2.95163	0.951907	-3.10075	0.00193031	0.0174392
EARS2	112.605	2.69877	0.871166	3.09788	0.00194909	0.0175962
jam2a	48.0984	-8.0306	2.59249	-3.09764	0.00195071	0.0175982
pik3r3a	2334.63	1.60038	0.517076	3.09506	0.00196775	0.0177394
ptprh__2	334.704	13.4014	4.33032	3.09478	0.0019696	0.0177433
grn1	1001.52	3.21982	1.04187	3.09042	0.00199876	0.0179931
lin7b	130.556	4.90535	1.58797	3.08906	0.0020079	0.0180625
kmt2a	5274.25	1.26204	0.408636	3.08843	0.00201216	0.0180879
acta2	60.9957	7.23518	2.3435	3.08734	0.00201956	0.0181415
ralgapa2	1018.95	1.75169	0.567484	3.08676	0.00202352	0.0181641
CDK18	76.229	-6.44287	2.08845	-3.085	0.00203552	0.0182589
cux2b	29.759	10.2356	3.31871	3.0842	0.00204104	0.0182953
znf1035	3120.98	1.07232	0.348029	3.08112	0.00206224	0.0184723
zc3h12b	38.0734	-9.33672	3.03168	-3.07972	0.00207194	0.018546
foxo1a	480.75	-1.89662	0.616096	-3.07846	0.00208077	0.0185985
ankrd24	106.551	4.7065	1.52876	3.07864	0.0020795	0.0185985
si:ch211-278p9.2	102.079	-5	1.62492	-3.07708	0.0020904	0.0186714
atp6ap1b	1247.23	-1.53359	0.498755	-3.07483	0.00210621	0.0187993
pecam1	5387.52	-4.60523	1.49791	-3.07444	0.002109	0.0188109
dhrs12	194.573	-3.44362	1.12037	-3.07365	0.00211459	0.0188473
nckap1	841.852	1.32834	0.432207	3.07338	0.00211648	0.0188509
insig1	1230.89	1.56074	0.507869	3.07312	0.00211834	0.0188541
lrrk2	2921.36	-1.13606	0.370054	-3.06999	0.00214063	0.019039
glb1l	3549.51	1.27104	0.414538	3.06615	0.00216833	0.0192719
uhrf1bp1l	2569.03	1.3487	0.439989	3.06531	0.00217446	0.0193127
dap	132.081	-4.97707	1.62652	-3.05996	0.00221368	0.0196472
tcf7l1b	112.337	-4.42893	1.44779	-3.05909	0.0022201	0.0196903
si:dkey-265e15.2__1	1170.09	-1.9128	0.625532	-3.05788	0.00222907	0.0197559
eif4g3a	1071.52	1.32721	0.434099	3.05739	0.00223277	0.0197748
tnfsf10	71.4333	-9.23007	3.02076	-3.05555	0.00224649	0.0198684
si:ch211-201o1.1	1079.76	2.59087	0.8479	3.05563	0.00224585	0.0198684
slc20a1b	10415.2	-1.10691	0.362386	-3.05449	0.00225442	0.0199246
zgc:64065__2	35.1468	-6.87395	2.25128	-3.05335	0.00226305	0.0199868
adamts15a	48.426	-9.68369	3.17385	-3.05109	0.00228013	0.0201236
stk10	1091.44	-1.52209	0.499401	-3.04784	0.00230493	0.0203145
bpgm	309.021	2.13877	0.701734	3.04783	0.00230499	0.0203145
mob1bb	209.258	-3.09903	1.01759	-3.04545	0.00232334	0.0204619
diaph2	2124.68	-1.55559	0.511165	-3.04323	0.00234054	0.0205991
rpl9	3194.65	-1.71399	0.563368	-3.0424	0.00234701	0.0206416
cblb	13737.6	1.40552	0.462062	3.04185	0.00235126	0.0206645
mctp1a	22.0056	9.73909	3.20312	3.0405	0.00236182	0.0207429
plaua	168.717	2.69048	0.885228	3.03931	0.00237124	0.0208111
sorbs2a	140.542	4.00432	1.31762	3.03907	0.0023731	0.020813
CR927215.1	130.91	-5.47127	1.80103	-3.03786	0.00238266	0.0208822
skap2	1554.14	1.35509	0.446183	3.03708	0.00238886	0.020922
arhgef12a	961.445	1.33067	0.438385	3.03539	0.00240228	0.021025
hnrnpa0l__1	2094.23	-1.40871	0.464445	-3.03311	0.0024205	0.0211698
bach1a	493.239	-1.84498	0.608882	-3.03011	0.00244463	0.021366
napab	673.626	-2.66852	0.880933	-3.0292	0.00245204	0.0214158
hs1bp3	201.85	-2.34617	0.77484	-3.02795	0.00246221	0.0214898
si:ch211-126j24.1	395.671	4.58999	1.51746	3.02478	0.00248811	0.0217008
si:dkey-119f1.1	293.437	2.11316	0.698967	3.02326	0.00250064	0.0217938
fgf13a	39.0029	5.34772	1.76897	3.02307	0.00250223	0.0217938
socs1a	124.819	4.59684	1.52216	3.01994	0.00252824	0.0219899
sema4bb	91.5629	5.5494	1.83746	3.02014	0.00252656	0.0219899
bin1b	2096.76	1.66961	0.552927	3.01958	0.00253128	0.0220012
zgc:152830	962.665	-1.78663	0.592048	-3.01771	0.00254695	0.0221069
wdr73	171.714	2.51032	0.831821	3.01786	0.00254563	0.0221069
arpp21	268.419	-2.33733	0.774883	-3.01637	0.00255823	0.022159
rpl11	1832.35	-1.76386	0.584728	-3.01655	0.00255667	0.022159
tbc1d10c	160.946	4.43585	1.47059	3.01638	0.00255815	0.022159
mycbp2	7001.92	1.17889	0.390937	3.01556	0.00256506	0.0222029
auts2a	62.2479	-9.05543	3.00624	-3.01221	0.00259349	0.0224336
sorbs3	343.808	-4.59062	1.52451	-3.01122	0.00260203	0.0224813
ahnak	1050.35	-2.5552	0.848579	-3.01115	0.00260257	0.0224813
rln3a	28.3285	10.1645	3.37698	3.00992	0.00261315	0.0225572
rpl7a	5878.65	-1.69616	0.563774	-3.00857	0.00262478	0.0226421
slc41a1	72.5154	6.9204	2.30041	3.00833	0.00262684	0.0226444
elovl5	157.276	3.10227	1.03282	3.00369	0.00266731	0.0229775
nol4la	833.991	1.63528	0.544591	3.00277	0.00267535	0.023031
zgc:91849	494.636	1.54545	0.515099	3.0003	0.00269717	0.023203
ubash3ba	1368.26	1.55223	0.517446	2.99979	0.00270164	0.0232154
ca12	40.745	6.66255	2.22106	2.99972	0.0027023	0.0232154
nfil3-5	50.6952	3.46987	1.15701	2.99899	0.00270875	0.023255
dnmt3bb.1	49.7473	-9.18177	3.06485	-2.99583	0.00273703	0.0234818
rtn1a	20.6959	-8.27073	2.76132	-2.99521	0.00274257	0.0235133
rgs12a	196.898	5.20244	1.73747	2.99426	0.00275108	0.0235703
zgc:194312	2770.24	1.66459	0.555979	2.99398	0.00275365	0.0235762
lpin1	34.3413	-7.52983	2.51772	-2.99073	0.00278311	0.0238123
AL831726.2	659.904	-1.96845	0.658269	-2.99035	0.00278661	0.0238261
sfxn5a	31.7609	-5.69407	1.90559	-2.98808	0.00280733	0.0239846
itgav	3066.32	-2.75671	0.922622	-2.98791	0.00280895	0.0239846
per1b	5876.57	1.2152	0.407212	2.9842	0.00284325	0.024261
dennd6b	195.125	2.87933	0.965164	2.98325	0.00285202	0.0243194
rpl36	1858.15	-1.51689	0.50858	-2.9826	0.00285815	0.0243551
hspa12b	65.1495	-9.03729	3.03311	-2.97955	0.00288676	0.0245823
zgc:165555__4	86.9164	-4.64264	1.55846	-2.979	0.00289195	0.0246099
si:ch1073-214b20.2	27.7669	10.1355	3.40356	2.97792	0.00290207	0.0246794
GGT7	43.6964	-6.84282	2.29973	-2.97549	0.00292525	0.0248597
rpl17	1845.96	-1.50548	0.506114	-2.97459	0.00293385	0.024916
nfkbie	2258.35	1.26087	0.424585	2.96964	0.00298144	0.0253031
flvcr2b	553.081	-3.57581	1.20468	-2.96828	0.00299475	0.025399
zmiz1b	35.7225	-7.76328	2.61564	-2.96802	0.00299723	0.0254029
rorab	366.838	-2.84881	0.960385	-2.96632	0.00301386	0.0255095
rpl15	3500.78	-1.61244	0.543559	-2.96645	0.00301258	0.0255095
lmbrd1	753.589	1.46238	0.493241	2.96483	0.00302846	0.0256158
si:dkey-10h3.3	404.684	3.63569	1.22647	2.96435	0.00303319	0.0256387
cdc42bpaa	475.035	-4.46448	1.50732	-2.96187	0.00305772	0.0258287
rnd3a	74.2169	-8.83712	2.98468	-2.96082	0.00306821	0.0258779
fus	447.722	2.4818	0.838255	2.96067	0.0030697	0.0258779
sema6a	131.59	5.97336	2.01749	2.96078	0.0030686	0.0258779
st3gal5	1711.5	1.34774	0.455544	2.95853	0.00309106	0.0260405
si:dkey-42i9.6	1978.63	-1.6523	0.5588	-2.95688	0.00310773	0.026146
si:cabz01036006.1	764.993	1.64675	0.556917	2.9569	0.00310749	0.026146
RAP1GAP	801.134	2.09709	0.70957	2.95544	0.00312219	0.0262502
ctsh	1241.78	-1.75008	0.592216	-2.95514	0.00312527	0.0262585
baxa__2	368.431	3.36215	1.13795	2.95458	0.00313093	0.0262885
dennd2da	309.579	5.95249	2.01533	2.95361	0.00314081	0.0263539
nckap5l	2509.16	1.26696	0.429571	2.94936	0.00318429	0.026701
crygs3	36.1771	-7.78109	2.63876	-2.94877	0.00319044	0.0267348
mob3c	51.0049	-9.08396	3.08117	-2.94822	0.00319614	0.026757
rps8b	49.4215	4.9566	1.68129	2.9481	0.00319734	0.026757
cry5	350.519	-3.05746	1.03746	-2.94705	0.00320825	0.0268305
tmco4	60.9886	-8.89066	3.01957	-2.94435	0.00323632	0.0270473
CU856343.1	36.7202	-9.28452	3.15379	-2.94392	0.0032408	0.0270521
zgc:92107	1237.82	2.52359	0.857232	2.94389	0.00324119	0.0270521
pde4cb	359.505	2.46952	0.839581	2.94137	0.00326759	0.0272364
gpr52	178.888	3.1438	1.06879	2.94146	0.00326667	0.0272364
cbr1l	18.8184	-8.24169	2.80293	-2.94039	0.00327803	0.0273054
NAV1 (1 of many)	2186.2	1.39068	0.473019	2.94	0.0032821	0.0273212
rbm38	276.523	2.21431	0.753702	2.93791	0.00330431	0.0274879
CU459186.3	21.985	-5.71131	1.94447	-2.93721	0.00331178	0.0275319
cx28.1	40.3414	-9.11127	3.10241	-2.93684	0.00331579	0.0275403
ndel1b	442.845	-1.89112	0.643959	-2.93671	0.00331717	0.0275403
atxn1a	648.775	-1.524	0.519608	-2.93299	0.00335718	0.0278542
CABZ01068356.1	457.276	2.76301	0.942163	2.93262	0.00336113	0.0278687
fam222a	99.1593	5.32929	1.81748	2.93224	0.00336528	0.0278847
snx29	2315.41	1.62805	0.555269	2.932	0.00336783	0.0278875
vdac3	517.057	-1.91496	0.653241	-2.93148	0.00337352	0.0279163
slc44a2	1964.61	1.59588	0.544941	2.92855	0.00340549	0.0281623
f3b	54.8341	-7.74479	2.64747	-2.92536	0.00344063	0.0284343
mink1	178.166	-2.69157	0.920349	-2.92451	0.00345002	0.0284932
rps28	1308.31	-1.41272	0.483112	-2.9242	0.00345339	0.0285023
ifi45	52.8916	-9.09852	3.11319	-2.92257	0.0034715	0.0286029
si:ch211-147m6.1	186.531	-3.07781	1.05313	-2.92253	0.00347199	0.0286029
slc25a22a	434.421	-1.52106	0.520465	-2.9225	0.00347238	0.0286029
sigmar1	70.7488	-4.85016	1.65995	-2.92187	0.00347938	0.0286418
hspd1	442.694	-2.15599	0.739079	-2.91713	0.0035327	0.0290618
ppp1r3b	48.2866	-9.10153	3.12266	-2.91467	0.00356061	0.0292722
si:ch211-133l5.4	34.9531	-8.98323	3.08385	-2.91299	0.00357981	0.0294109
zgc:153372	357.874	-4.73896	1.62758	-2.91166	0.00359519	0.0295181
si:dkey-206d17.12	1324.91	-2.0664	0.709844	-2.91106	0.00360204	0.029555
aamdc	30.6542	-6.28255	2.15991	-2.90871	0.00362921	0.0297586
akt1	420.641	2.43686	0.838203	2.90725	0.00364624	0.0298788
tor1l3	27.0178	10.0962	3.47509	2.9053	0.00366901	0.0300458
cetn3	406.629	-2.79219	0.961165	-2.90501	0.00367242	0.0300542
rab8b	2821.44	1.10372	0.380313	2.90214	0.00370624	0.0303114
dcun1d2b	54.4196	-5.37269	1.85292	-2.89958	0.00373658	0.0305255
lgi1a	26.5255	10.0695	3.47282	2.89953	0.00373727	0.0305255
ssr4	282.295	-2.25198	0.777024	-2.89821	0.00375295	0.0306138
plxnb3	2508.74	1.98087	0.68346	2.8983	0.00375189	0.0306138
rab12	55.1514	6.48685	2.24021	2.89564	0.00378386	0.0308261
mmd2b__2	28.7986	10.1883	3.51843	2.8957	0.00378317	0.0308261
syt13	28.9187	6.72731	2.32485	2.89365	0.00380792	0.0310021
si:dkey-97a13.6	496.171	-1.79188	0.619308	-2.89336	0.00381145	0.0310108
fam20ca	33.4142	-9.14839	3.16691	-2.88874	0.00386783	0.0314492
cul5a	1556.81	-1.56779	0.542802	-2.88833	0.00387296	0.0314624
si:ch211-214c20.1__2	96.1179	3.26726	1.13124	2.88821	0.00387444	0.0314624
CU571081.1	507.109	-4.54729	1.5753	-2.88662	0.003894	0.0316008
si:ch211-284f22.3	210.082	-4.49961	1.55923	-2.88578	0.00390443	0.031665
sbf1	1596.16	1.19573	0.414406	2.88541	0.00390903	0.031682
fmnl2a	29.5565	-6.82393	2.36601	-2.88415	0.00392471	0.0317886
hist1h2a11__1	26.5165	-6.12417	2.12465	-2.88244	0.00394614	0.0319417
spock1	92.7598	-5.43645	1.88656	-2.88167	0.00395573	0.0319782
bcl6ab	1538.39	2.08959	0.725107	2.88176	0.00395457	0.0319782
tgm1l1	67.0293	-8.70608	3.0268	-2.87633	0.00402326	0.0325033
pde4bb	454.166	4.7753	1.66067	2.87553	0.00403353	0.0325654
bri3	1193.91	-1.40177	0.488263	-2.87093	0.00409266	0.0330216
si:dkey-187e18.1	5401.35	1.1171	0.389494	2.86809	0.00412959	0.0332983
ftr06__2	51.6929	6.79292	2.37039	2.86574	0.00416041	0.0335253
dusp2	763.106	-2.1069	0.735734	-2.86367	0.00418769	0.0337236
pik3c2a	2291.96	1.02361	0.357779	2.86101	0.00422288	0.0339853
atp2b1a	1019.75	3.05544	1.06887	2.85858	0.00425544	0.0342255
atp6v1c1a	597.292	-1.62854	0.570052	-2.85682	0.00427906	0.0343935
srgap1a	32.7889	-9.12114	3.1946	-2.85517	0.00430135	0.0345506
ikbkb	789.39	1.49673	0.524287	2.8548	0.00430646	0.0345696
hnrnpa3	41.9371	4.85697	1.70288	2.85221	0.00434168	0.0348301
rpl18a	3119.62	-1.28511	0.450623	-2.85186	0.00434642	0.034846
ostf1	2324.97	1.03196	0.362187	2.84925	0.0043822	0.0351105
map3k8	953.649	1.22495	0.42999	2.84878	0.00438873	0.0351405
npl	956.752	-1.55177	0.544976	-2.84741	0.00440763	0.0352471
maml3	1535.52	1.41063	0.495382	2.84756	0.00440565	0.0352471
zgc:173742	984.03	9.4197	3.30962	2.84615	0.00442509	0.0353643
tpx2	26.384	-7.29115	2.56276	-2.84503	0.00444067	0.0354657
hsp90aa1.2	23435.6	1.26528	0.444762	2.84484	0.00444341	0.0354657
zeb1a	1869.3	1.6413	0.577162	2.84374	0.00445869	0.0355651
tent5ab	823.569	-2.59529	0.912767	-2.84332	0.00446466	0.0355902
snrpf	45.0925	-4.44423	1.56359	-2.84233	0.0044785	0.035678
ankrd33ba	108.051	6.02078	2.11899	2.84135	0.00449234	0.0357656
rps25	2621.39	-1.49594	0.526735	-2.84003	0.00451099	0.0358915
dpy19l3	1557.19	1.52584	0.537416	2.83922	0.00452235	0.0359591
mxe	251.209	-5.38787	1.898	-2.83871	0.00452956	0.0359796
si:ch211-197g15.8	439.86	1.97834	0.696931	2.83864	0.00453063	0.0359796
nr1d1	4634.94	1.06963	0.376862	2.83824	0.00453631	0.0360019
gpx4a	172.089	2.83355	0.999662	2.83451	0.00458962	0.0364021
scarb2c	237.657	-4.01113	1.41528	-2.83417	0.0045945	0.0364179
cycsb	564.385	-1.80946	0.638846	-2.8324	0.00462007	0.0365976
tp53bp1	614.655	1.43186	0.5058	2.83089	0.0046419	0.0367474
rplp1	3798.4	-1.30795	0.462348	-2.82894	0.0046703	0.036949
cers2b	1345.39	-1.57993	0.559145	-2.82563	0.00471885	0.0373097
si:ch73-130a3.4	114.192	-5.18463	1.83553	-2.82459	0.00473407	0.0374066
il11b	108.396	5.60784	1.98553	2.82436	0.00473758	0.0374108
rps19	989.872	-1.55285	0.550197	-2.82235	0.00476729	0.0376219
enosf1	437.263	-2.93098	1.03885	-2.82138	0.00478177	0.0377126
rorcb	17.1981	9.41141	3.33755	2.81985	0.00480458	0.0378688
snx13	511.86	-1.37509	0.487856	-2.81863	0.00482292	0.0379895
papss2b	187.74	-4.76987	1.69334	-2.81685	0.00484974	0.0381769
zgc:112962	700.862	1.32379	0.470228	2.81521	0.00487457	0.0383484
slc39a1	303.219	-2.07893	0.738674	-2.8144	0.00488678	0.0384205
im:7136021	117.037	-2.92177	1.0389	-2.81237	0.00491779	0.0386402
pstpip1a	69.0387	3.59805	1.27988	2.81124	0.00493508	0.0387519
lats2	187.326	-3.21546	1.14438	-2.80979	0.00495737	0.0389027
hps3	611.282	-1.80791	0.643519	-2.80942	0.00496313	0.0389121
rerea	1491.47	-1.24348	0.442629	-2.80931	0.00496474	0.0389121
si:ch211-166a6.5	336.811	-2.31866	0.825557	-2.8086	0.00497581	0.0389746
RPS17	1246.43	-1.84258	0.656422	-2.80701	0.00500043	0.0391431
atp6v1d	438.025	-1.60602	0.572417	-2.80568	0.00502111	0.0392806
mindy3	534.767	1.87709	0.669403	2.80412	0.00504538	0.039446
hsp90ab1	16790.7	-1.53886	0.548928	-2.8034	0.00505669	0.0395017
grap2b	688.219	1.72589	0.615671	2.80327	0.00505877	0.0395017
kdm6a	1497.09	1.22725	0.437957	2.80221	0.0050753	0.0396062
tox2	49.2111	4.14376	1.47937	2.80104	0.00509388	0.039702
rab1bb	47.0445	4.44176	1.58572	2.80109	0.00509298	0.039702
si:ch73-236c18.2__1	55.644	5.0821	1.81532	2.79957	0.00511711	0.0398584
hlfa	842.212	-1.82426	0.652055	-2.79771	0.00514664	0.0400389
bnip3lb	670.445	-1.60413	0.573357	-2.79778	0.00514548	0.0400389
si:dkey-238d18.3	71.3416	-8.7344	3.12292	-2.79686	0.00516011	0.040119
cyb5b	259.31	-2.38844	0.854169	-2.79621	0.0051705	0.040175
cflarb	377.931	-1.60191	0.573388	-2.79376	0.00520993	0.0404564
zgc:171759__5	134.799	-3.38543	1.21215	-2.79291	0.00522368	0.0405382
gnsb	1126.22	-1.77286	0.63484	-2.79261	0.00522842	0.04055
aspa	704.895	-1.70341	0.610306	-2.79107	0.00525342	0.0407189
uap1l1	1160.4	-1.47892	0.530259	-2.78905	0.00528632	0.0409168
xiap	2341.99	1.42199	0.509873	2.7889	0.0052887	0.0409168
EPB41L2	1306.53	3.7587	1.34766	2.78907	0.00528599	0.0409168
BX537291.1	86.1534	-4.66949	1.67523	-2.78738	0.00531366	0.0410847
timm10b	41.0652	-5.12089	1.8376	-2.78673	0.00532425	0.0411414
nadka__2	283.433	-2.66218	0.955437	-2.78634	0.00533062	0.0411653
src	288.227	2.32691	0.835736	2.78426	0.00536494	0.0413973
SPTBN4	50.2288	6.34513	2.27904	2.78413	0.00536722	0.0413973
zgc:64065__1	43.5784	-8.81241	3.16747	-2.78216	0.0053999	0.0416238
xpo6	2628.56	1.403	0.504708	2.77982	0.00543887	0.0418986
inppl1b	550.498	3.89608	1.40172	2.7795	0.00544433	0.041915
mepce	144.59	2.53835	0.913682	2.77816	0.00546684	0.0420627
si:dkey-79f11.8	46.1676	-9.21328	3.319	-2.77592	0.00550458	0.0423173
si:ch211-269k10.5	741.015	2.38543	0.859368	2.7758	0.00550665	0.0423173
si:ch211-193k19.1	973.201	1.5749	0.567443	2.77544	0.00551277	0.0423385
snd1	1243.5	-1.2151	0.438	-2.7742	0.00553373	0.0424736
prcp	480.207	-2.16906	0.782004	-2.77371	0.00554202	0.0425113
slc25a5	9427.76	-1.40863	0.507948	-2.77318	0.00555118	0.0425557
CRACR2A	345.145	-2.37048	0.855006	-2.77247	0.00556331	0.0426227
itga4	155.724	3.33477	1.20313	2.77176	0.00557548	0.04269
kif5ba__2	570.556	1.73485	0.626367	2.7697	0.00561071	0.0429337
ndrg3a	226.097	-2.30356	0.831999	-2.7687	0.00562801	0.0430364
scn4ab	29.0375	10.1999	3.68423	2.76853	0.00563096	0.0430364
neo1b__1	101.252	5.54356	2.00254	2.76827	0.00563555	0.0430454
junbb	2929.44	-1.88758	0.681947	-2.76794	0.00564127	0.0430629
itpr1a	5535.49	1.58184	0.571544	2.76766	0.00564602	0.0430732
rbm28	458.459	-1.62528	0.587473	-2.76657	0.005665	0.0431918
jak1	6068.73	-1.1326	0.409464	-2.76605	0.005674	0.0432343
nitr2a	237.218	13.23	4.78487	2.76496	0.00569291	0.0433521
si:dkey-192g7.3	1946.99	-4.3196	1.56281	-2.76399	0.00570999	0.0434525
sema3bl	308.939	4.38633	1.58706	2.76382	0.00571299	0.0434525
CABZ01025780.1	30.8004	-9.03088	3.26983	-2.76188	0.00574693	0.0436843
si:dkey-112e7.2	680.48	-1.44497	0.523539	-2.76001	0.00577997	0.043909
dspa	22.1982	-8.51843	3.08767	-2.75886	0.00580042	0.0440377
tomm20a__2	162.936	-4.45073	1.61369	-2.75811	0.00581373	0.0440857
mcu	416.085	3.12549	1.13314	2.75825	0.00581124	0.0440857
rbfox3a	79.1225	-5.52321	2.00325	-2.75712	0.00583135	0.0441927
si:ch211-199o1.2	41.479	6.91483	2.50871	2.75633	0.00584539	0.0442725
tmod1	24.2453	9.93981	3.60654	2.75605	0.00585032	0.0442832
zgc:112148	30.8073	-9.03121	3.27814	-2.75498	0.00586956	0.0444022
cib2	26.9232	7.66134	2.78167	2.75422	0.00588318	0.0444785
gpr155a	945.197	1.24003	0.450313	2.7537	0.00589255	0.0445038
chek2	126.989	3.37404	1.2253	2.75364	0.00589358	0.0445038
si:ch211-67f24.7__2	23.8294	8.47447	3.07897	2.75238	0.00591646	0.0446498
bcar1	30.2633	-6.6243	2.40747	-2.75156	0.00593112	0.0447337
pum3	236.703	-2.54041	0.9235	-2.75085	0.00594416	0.0447852
si:dkey-264f17.1	266.66	-2.20664	0.802184	-2.7508	0.00594506	0.0447852
ppiaa	4707.19	-1.3396	0.487048	-2.75045	0.00595138	0.044806
tmsb4x	40494.2	1.01221	0.368313	2.74823	0.00599181	0.0450835
si:ch73-334d15.1	261.096	2.38769	0.869017	2.74757	0.00600379	0.0451467
tpp1	1025.07	-2.16618	0.788781	-2.74624	0.00602824	0.0453035
arl6ip1	2902.3	1.06809	0.389133	2.74481	0.00605467	0.045475
znf831	1996.5	1.94415	0.708479	2.74412	0.00606733	0.0455429
dse	251.231	-3.24729	1.18462	-2.74122	0.00612124	0.0458929
pgm2l1	547.381	1.88977	0.689345	2.74139	0.00611789	0.0458929
faxdc2	92.5519	-3.80648	1.38928	-2.73989	0.006146	0.0460512
si:ch211-51i16.1	48.2756	-8.68127	3.16927	-2.7392	0.00615886	0.0460927
rpl8	3294.68	-1.22801	0.448296	-2.73929	0.00615725	0.0460927
psmb7	26.1576	-6.09546	2.22651	-2.73767	0.0061876	0.0462803
atp6v1f	215.753	-2.03773	0.744698	-2.73632	0.00621308	0.0464433
xaf1	753.152	-1.47256	0.538307	-2.73554	0.00622773	0.0465253
ifrd1	900.453	-1.66598	0.609246	-2.7345	0.00624744	0.0466449
wasb	3848.28	1.36618	0.499738	2.73379	0.00626106	0.0467189
lgals9l5	58.5679	-8.46849	3.09825	-2.73332	0.00627	0.0467578
tom1	135.321	-2.61684	0.958171	-2.73108	0.00631281	0.0470215
znf644b	811.285	1.53921	0.563575	2.73115	0.00631145	0.0470215
jade2	706.527	2.20424	0.807628	2.72927	0.00634742	0.0472514
prkcdb	1258.74	-1.50223	0.550547	-2.72862	0.00635996	0.0473168
rbbp8l	31.0356	7.86761	2.88401	2.72801	0.00637183	0.0473771
si:ch73-100l22.3	373.001	2.1569	0.790872	2.72724	0.00638661	0.047459
zmp:0000001082	8458.35	0.977306	0.358377	2.72703	0.00639075	0.0474618
kcnab2a	182.439	-5.11827	1.87728	-2.72644	0.00640225	0.0475192
CT583642.2	79.1373	-5.88042	2.15796	-2.72499	0.00643026	0.047699
itgb1b.2	23.48	9.89362	3.63306	2.72322	0.00646487	0.0479275
vdac2	822.186	-1.35934	0.499272	-2.72265	0.00647615	0.0479829
phf20b	2381.24	1.46718	0.539166	2.72121	0.00650434	0.0481635
acy3.2	131.138	2.29242	0.842672	2.72042	0.00651994	0.0482506
cbx4	47.3647	3.82635	1.40677	2.71996	0.00652898	0.0482891
nck1b	462.947	-1.35838	0.499571	-2.7191	0.00654591	0.048386
ms4a17a.11	212.625	-4.38158	1.61306	-2.71631	0.00660136	0.0487673
dennd4b	385.403	-3.83944	1.41382	-2.71565	0.00661461	0.0488079
nkl.3	28.0119	9.38432	3.45545	2.7158	0.0066115	0.0488079
acer2	718.536	-2.53871	0.935038	-2.71508	0.00662594	0.0488629
exoc6	1048.95	1.5245	0.561946	2.7129	0.00666981	0.0491576
eef1g	3454.84	-1.66616	0.614291	-2.71234	0.00668106	0.0492118
fcho2	1932.23	-1.23659	0.456051	-2.71153	0.00669736	0.049303
urb1	483.698	-1.87784	0.692688	-2.71094	0.00670919	0.0493613
ehmt1a	696.632	1.24949	0.461105	2.70978	0.00673285	0.0495064
ddx10	338.368	-1.90649	0.703617	-2.70955	0.00673739	0.049511
c1d	52.6901	-5.82509	2.15057	-2.70863	0.0067562	0.0496203
zfhx3	2074.64	-2.10734	0.778178	-2.70804	0.00676819	0.0496794
sgsm1a	205.567	4.16433	1.53864	2.70651	0.00679945	0.0498798
etv7	299.959	2.90132	1.07258	2.705	0.00683047	0.0500782
si:ch211-243a20.4	355.724	-3.97216	1.46929	-2.70345	0.00686231	0.0502605
ptpn23b	261.359	-1.78525	0.66037	-2.7034	0.00686332	0.0502605
slc39a13	168.21	-4.18335	1.54852	-2.70152	0.00690238	0.0504604
rxraa	3882.89	1.21354	0.449208	2.70151	0.00690261	0.0504604
tnrc18	2166.3	1.33251	0.493222	2.70165	0.00689971	0.0504604
si:dkey-238o14.1	108.244	-2.84218	1.05239	-2.70069	0.00691963	0.0505554
ybx1	3310.99	-1.21935	0.451635	-2.69986	0.00693696	0.0506527
slc7a7	4230.09	-1.06838	0.395972	-2.69813	0.00697299	0.0508863
atp2c1	798.798	1.79756	0.666469	2.69714	0.00699373	0.0509786
ccl19a.2	26.8168	7.65574	2.83837	2.69723	0.00699187	0.0509786
arhgef18b	2266.32	1.79177	0.664729	2.69548	0.00702867	0.0512037
mxd	545.051	-4.16949	1.54723	-2.69481	0.00704289	0.0512776
CU104709.1	1367.75	1.39859	0.519314	2.69315	0.00707804	0.0515038
cd63	3555.44	-1.06362	0.395184	-2.69145	0.00711418	0.0517369
cxcl8b.1	94.5671	-7.86926	2.92435	-2.69094	0.00712508	0.0517863
ksr1a	226.826	-4.58478	1.70567	-2.68797	0.00718886	0.0521955
rpl27	2133.81	-1.30058	0.48386	-2.68793	0.00718967	0.0521955
CABZ01109481.1	1986.06	1.33685	0.497506	2.6871	0.00720745	0.0522945
abi1a	1220.21	-1.48009	0.551111	-2.68565	0.00723896	0.0524627
notch2	8505.21	0.908066	0.338098	2.68581	0.00723541	0.0524627
pxk	436.072	-2.36429	0.88073	-2.68446	0.00726471	0.0526191
rpl13a	3175.75	-1.24567	0.464142	-2.68381	0.00727881	0.0526909
cct2__2	276.059	-1.76644	0.65825	-2.68353	0.00728484	0.0526971
ca5a	594.837	-1.44161	0.537271	-2.6832	0.00729206	0.0526971
mcm4	390.186	1.74147	0.649028	2.6832	0.00729221	0.0526971
si:dkey-118k5.3	692.755	-1.98439	0.740117	-2.68118	0.00733629	0.0529853
syne1b	5068.88	1.68408	0.628736	2.67851	0.00739499	0.0533786
slc2a12	225.469	-3.97468	1.48581	-2.67508	0.00747105	0.0538968
mknk2a	221.308	-4.02508	1.50483	-2.67479	0.00747772	0.053914
dyrk1b	625.655	1.36401	0.510186	2.67356	0.00750517	0.054081
si:dkey-109a10.2	203.232	2.8737	1.07534	2.67237	0.00753173	0.0542414
abcc4	960.101	1.69413	0.633999	2.67214	0.00753697	0.0542481
si:ch211-214p16.3	33.2734	6.96508	2.60829	2.67036	0.007577	0.0545051
si:ch211-165f21.7	176.037	3.44178	1.28937	2.66936	0.00759963	0.0546367
gata3	127.141	4.93576	1.84956	2.66862	0.00761646	0.0547265
fnip1	1256.67	-1.41428	0.530692	-2.66498	0.00769921	0.0552437
tmem63bb	184.71	2.55823	0.959978	2.66488	0.00770159	0.0552437
si:dkey-156m2.3	219.231	3.74702	1.40599	2.66504	0.007698	0.0552437
exoc3l4	27.5742	-8.75568	3.28588	-2.66464	0.00770718	0.0552523
fnbp1b__1	483.769	2.04403	0.767573	2.66298	0.00774529	0.0554939
rnasel3	22.9464	9.86033	3.7036	2.66237	0.00775935	0.0555631
sarnp	103.338	-3.7687	1.41598	-2.66156	0.007778	0.055665
zgc:100829	473.388	-4.22402	1.58842	-2.65926	0.00783131	0.0560148
CABZ01044235.1	245.771	2.36051	0.888098	2.65794	0.00786202	0.0562025
agap2	799.531	1.33411	0.502174	2.65667	0.00789161	0.0563821
rad51b	502.209	-2.67298	1.00628	-2.65631	0.0079002	0.0564115
ehbp1l1a	629.378	4.5111	1.6992	2.65483	0.00793475	0.0566261
mov10b.2	29.7716	-8.98187	3.3837	-2.65445	0.00794375	0.0566262
slc2a13b	280.738	-2.10291	0.792206	-2.6545	0.00794249	0.0566262
fli1a	78.529	-6.87966	2.5933	-2.65285	0.00798143	0.0568626
hgfb	226.735	-4.03794	1.52323	-2.65092	0.00802739	0.0571578
zgc:194990	58.3131	-8.15509	3.077	-2.65034	0.00804111	0.0571801
carf	511.677	1.40461	0.530001	2.65021	0.00804414	0.0571801
batf3	471.789	4.46641	1.68528	2.65024	0.00804348	0.0571801
fam135a	1069.98	1.98639	0.749675	2.64967	0.00805701	0.0572393
myo18ab	5208.64	0.911147	0.344356	2.64595	0.00814629	0.0578084
si:dkey-172j4.3	174.655	3.75266	1.41821	2.64606	0.00814362	0.0578084
hexb	1002.31	-1.57025	0.593699	-2.64486	0.00817243	0.0579287
osbpl2b	1817.56	1.94475	0.735266	2.64496	0.00817015	0.0579287
si:ch73-380l3.2__1	131.457	-7.58998	2.87143	-2.64327	0.00821091	0.0581687
hip1	903.903	1.5324	0.579937	2.64236	0.00823306	0.0582928
lrrc58b	148	-5.24506	1.98519	-2.64209	0.00823959	0.0583063
acsl1a	936.898	1.96267	0.743027	2.64145	0.00825523	0.0583842
fuca1.2	160.166	-4.36057	1.65143	-2.64048	0.00827875	0.0585177
prkab1a	30.2618	4.41021	1.6718	2.638	0.00833956	0.0589145
si:ch211-281l24.3	5582.04	2.23149	0.846035	2.63759	0.00834984	0.0589541
si:dkey-11f4.20	22.3021	9.81927	3.72382	2.63688	0.00836729	0.0590442
akr7a3	271.731	-1.95825	0.742812	-2.63627	0.00838222	0.0591164
crip1	413.603	-2.80029	1.06341	-2.63331	0.00845566	0.059601
rps13	1743.36	-1.58339	0.601708	-2.63149	0.0085012	0.0598886
hmha1a	5527.66	1.52196	0.578466	2.63103	0.00851274	0.0599363
irgq1	22.7148	-8.49193	3.22852	-2.63028	0.00853138	0.0600341
pitpnc1b	228.568	-4.15765	1.58166	-2.62866	0.00857212	0.0602871
bub1bb	25.0075	-7.65741	2.91442	-2.62742	0.00860358	0.0604409
arhgdia	2361	1.06339	0.404726	2.62743	0.00860328	0.0604409
s100z	58.3585	-5.5732	2.12183	-2.62659	0.00862443	0.0604525
ch25h	4664.15	-1.16258	0.442556	-2.62696	0.00861506	0.0604525
CU019662.1	745.746	1.68109	0.640005	2.62668	0.00862222	0.0604525
ftr72	159.371	2.10985	0.803211	2.62677	0.00862003	0.0604525
pop5	71.9231	3.41333	1.30002	2.6256	0.00864974	0.0605963
paqr4a	255.097	-2.38308	0.90787	-2.62491	0.00866711	0.0606842
limd2	537.261	3.07428	1.17207	2.62295	0.00871715	0.0610007
eef1da	838.892	-1.67261	0.637744	-2.6227	0.00872368	0.0610125
stat5a	1083.06	-1.87346	0.714386	-2.62247	0.00872951	0.0610194
pik3cg	2924.31	1.07518	0.410137	2.62152	0.00875376	0.061155
si:ch211-132b12.7	9346.84	-1.15238	0.43964	-2.62118	0.00876253	0.0611824
si:ch1073-390k14.1	29.3961	-8.64451	3.29926	-2.62014	0.0087894	0.061336
dlgap5	17.7541	-6.70751	2.56038	-2.61973	0.00879991	0.0613754
RPL37A	1838.62	-1.42817	0.545712	-2.61708	0.00886845	0.0618192
rpl36a	2693.57	-1.35228	0.516934	-2.61597	0.00889738	0.0619866
CABZ01038524.1	376.93	1.53895	0.588492	2.61507	0.0089208	0.0621154
wdr90	307.948	4.32389	1.6537	2.61467	0.00893128	0.062154
si:dkey-211g8.8	67.5227	-8.57311	3.27944	-2.6142	0.00894377	0.0622066
rasgef1ba	1611.27	-3.51576	1.34558	-2.61282	0.00897985	0.0624231
rxrab	542.825	4.03842	1.5463	2.61166	0.0090104	0.0626009
adra2db	22.2269	9.81456	3.75831	2.61143	0.00901654	0.0626091
rps7	3492.4	-1.224	0.468907	-2.61032	0.00904583	0.0627778
rps9	3753.66	-1.30476	0.500088	-2.60906	0.00907903	0.0629736
khdc4	1214.1	1.0933	0.419152	2.60836	0.00909772	0.0630685
bhlhe41	1907.94	-1.54145	0.591234	-2.60718	0.0091292	0.0632364
si:ch211-284e13.6	61.4613	6.09293	2.33708	2.60707	0.00913197	0.0632364
kalrna	107.009	4.86727	1.86852	2.60488	0.00919051	0.0636068
KIF2A	776.066	-1.33688	0.513559	-2.60316	0.00923689	0.0638927
hspbp1	326.992	-1.74044	0.669189	-2.60081	0.00930034	0.0642802
sash1b	55.115	6.17806	2.37553	2.60071	0.00930311	0.0642802
zgc:153759__1	834.265	-1.64486	0.633151	-2.59789	0.00937972	0.0647386
si:ch211-246e12.3	490.495	1.65593	0.637367	2.59807	0.00937485	0.0647386
exosc5	23.4032	-6.17115	2.37702	-2.59617	0.00942698	0.0650291
timp2a	416.731	4.10522	1.58271	2.59378	0.00949267	0.0654465
acod1	33.0843	-4.24755	1.63824	-2.59276	0.00952094	0.0656055
pi4k2a	286.942	-1.6327	0.629782	-2.59249	0.00952847	0.0656215
timm29	64.2005	-8.15395	3.14661	-2.59135	0.00956016	0.0658037
wdr91	413.348	-2.29583	0.886122	-2.59088	0.00957317	0.0658574
smpd2a	118.614	-4.13641	1.59794	-2.5886	0.00963676	0.0662587
rpl26__2	1360.13	-1.35629	0.524143	-2.58763	0.0096639	0.066409
arl8a	725.738	-1.29808	0.502202	-2.58477	0.00974443	0.0669259
gchfr	21.3092	9.75367	3.77755	2.58201	0.00982276	0.0674271
dnase1l4.1	30.0561	-8.49641	3.29147	-2.58134	0.00984166	0.0675047
tchp	37.3991	-3.44388	1.3342	-2.58123	0.00984477	0.0675047
CR847944.2	33.7594	-6.6423	2.57359	-2.58094	0.00985313	0.0675253
rimkla	711.032	-1.41133	0.546906	-2.58057	0.00986382	0.0675618
nceh1b.1	31.6579	-8.46069	3.28008	-2.57942	0.00989677	0.0677507
bahcc1a	83.3069	-5.36965	2.08262	-2.57831	0.00992845	0.0679306
si:dkey-151g10.6	3952.48	-1.28895	0.500275	-2.57648	0.00998118	0.0682544
nln	19.3796	8.15605	3.16971	2.57312	0.0100786	0.0688833
blvra	69.3833	-4.68791	1.82237	-2.57243	0.0100987	0.0689834
dlgap3	20.3491	-8.37668	3.25987	-2.56964	0.0101806	0.0695047
lsm7	45.9794	-6.76104	2.6314	-2.56937	0.0101883	0.0695201
dnase2	1396.93	-1.09984	0.428367	-2.56751	0.0102432	0.0698567
axin2	36.1186	-5.31586	2.07079	-2.56707	0.0102563	0.0698706
zgc:77784	519.239	8.85259	3.44837	2.56718	0.0102529	0.0698706
spns3	66.7691	-5.25677	2.04869	-2.56591	0.0102904	0.0700649
vps37b	446.123	1.98298	0.772998	2.56531	0.0103084	0.0701491
pstpip1b	922.287	1.89654	0.739472	2.56472	0.0103259	0.0702303
ubald1b	330.904	-2.10019	0.819171	-2.5638	0.0103533	0.0703787
runx2b	29.7921	-7.55306	2.94681	-2.56313	0.0103734	0.0704775
si:dkeyp-4c4.2	985.214	1.48566	0.580053	2.56125	0.0104296	0.0708212
TMEM196 (1 of many)	1186.09	1.49255	0.582873	2.56068	0.0104468	0.0708999
fam13b	2940.32	0.954068	0.372672	2.56007	0.010465	0.0709473
chsy3	62.2446	5.02471	1.96269	2.56011	0.0104638	0.0709473
pacsin1a	34.3791	-8.43531	3.29836	-2.55743	0.010545	0.0714508
pi4kaa	1758.96	1.00029	0.391373	2.55584	0.0105932	0.0717387
grk3	1505.02	1.09328	0.42809	2.55385	0.0106539	0.0720769
si:ch73-27e22.7	20.9426	9.72853	3.80939	2.55383	0.0106545	0.0720769
si:ch211-8c17.4	1306.79	-3.6378	1.42557	-2.55182	0.0107161	0.0724544
si:dkey-96n2.3	38.9285	6.001	2.35294	2.55043	0.010759	0.0727057
capns1b	683.838	1.30276	0.511032	2.54926	0.0107951	0.0729105
rps27a	3333.74	-1.49047	0.585401	-2.54607	0.0108943	0.0735406
CU459094.3	422.623	-3.81233	1.50281	-2.53681	0.0111868	0.0754752
ostm1	817.455	-1.47434	0.581355	-2.53604	0.0112114	0.0755603
pip5k1bb	434.121	1.82028	0.717723	2.53619	0.0112066	0.0755603
ugt2a6	51.1505	-8.10052	3.19509	-2.5353	0.011235	0.0756787
kif20a	34.4193	-8.33084	3.28691	-2.53455	0.0112592	0.0758014
notch3	69.0343	-6.97652	2.7538	-2.53342	0.0112956	0.0760056
cep68	102.124	2.43731	0.96244	2.53242	0.0113277	0.076181
kpna2	54.7698	-4.68432	1.85069	-2.53112	0.0113699	0.076424
ptpn6	6719.94	1.06309	0.420073	2.53073	0.0113825	0.0764508
cep135	255.054	3.25998	1.28821	2.53062	0.011386	0.0764508
fibpb	184.461	2.24159	0.887037	2.52706	0.0115023	0.07719
tob1b	974.09	-1.84281	0.729295	-2.52684	0.0115093	0.0771959
calm2b	345.763	-2.67111	1.05751	-2.52585	0.0115418	0.0773731
maco1a	420.959	1.557	0.616805	2.5243	0.0115929	0.0776745
gar1	39.4651	-4.25418	1.68606	-2.52314	0.0116311	0.0778885
ppp3ccb	1033.02	1.07904	0.427905	2.52168	0.0116795	0.0781714
si:dkey-238m4.4	55.9454	6.00589	2.38301	2.5203	0.0117255	0.0784378
si:dkey-220k22.3	26.0886	-8.79134	3.48851	-2.52008	0.0117328	0.0784448
adprh	59.5666	-4.4839	1.78026	-2.51867	0.0117799	0.0787179
cdkn3	62.0869	3.86078	1.53301	2.51843	0.0117879	0.0787298
wwc3	42.5781	-6.61626	2.62765	-2.51794	0.0118045	0.0787568
mdh1aa	1244.94	-1.49537	0.593866	-2.51802	0.0118016	0.0787568
si:ch73-208g10.1	294.104	3.1408	1.2475	2.51768	0.0118129	0.0787714
malt3	3618.03	1.80575	0.717344	2.51728	0.0118266	0.0788214
crebrf	1309.23	1.31343	0.521938	2.51644	0.0118546	0.078966
six5	28.2617	-8.44256	3.35586	-2.51576	0.0118774	0.079059
arfgef1	924.298	1.36472	0.54249	2.51566	0.0118811	0.079059
tpt1	7392.87	-1.28761	0.512052	-2.51461	0.0119165	0.0792205
kif22	217.432	1.88746	0.750613	2.51456	0.011918	0.0792205
plekhm3	610.3	2.12739	0.846262	2.51387	0.0119416	0.0793359
tacc3	21.7402	-6.97667	2.7779	-2.51149	0.0120222	0.0797453
lonrf1l	1447.3	-1.43328	0.570675	-2.51156	0.0120199	0.0797453
htr7c	35.2262	6.72408	2.67715	2.51166	0.0120165	0.0797453
cul5b	20.5497	9.70135	3.86476	2.51021	0.0120661	0.0799939
entpd2a.2	57.1144	-7.9676	3.17469	-2.50973	0.0120824	0.0800604
cspp1a	35.2872	6.03467	2.40495	2.50927	0.0120981	0.0801218
arhgef37	636.599	2.26736	0.903945	2.5083	0.0121314	0.0803003
edem3	528.471	-1.66233	0.663113	-2.50685	0.0121812	0.0805878
cep152	82.9273	4.01908	1.60345	2.50653	0.0121924	0.0806196
ogt.1__2	5169.51	1.01617	0.405465	2.5062	0.0122037	0.0806522
hebp2	92.3273	-3.01203	1.20207	-2.5057	0.0122208	0.0807224
MAP3K13	83.9961	3.07929	1.22912	2.50528	0.0122353	0.0807764
nrip1a	312.374	-2.90094	1.15842	-2.50422	0.012272	0.080962
znf438	462.325	1.9355	0.772931	2.5041	0.0122763	0.080962
gnpda2	156.017	-4.66675	1.8651	-2.50215	0.0123442	0.0813292
rpl3	6113.67	-1.36484	0.545471	-2.50213	0.0123449	0.0813292
si:ch211-215e19.3	842.782	2.00663	0.802036	2.50192	0.0123522	0.0813346
slc25a35	107.022	2.984	1.19312	2.50102	0.0123837	0.0814998
march7__1	428.002	-1.54516	0.617892	-2.5007	0.0123949	0.081531
rps27.1	1600.61	-1.55892	0.623988	-2.49831	0.0124786	0.0820383
trpm1a	91.1738	4.28799	1.71727	2.49698	0.0125256	0.0823045
ptgs2b	526.843	1.38732	0.555727	2.49641	0.0125457	0.0823935
slc38a2	2705.63	-1.23543	0.495143	-2.49509	0.0125926	0.0826589
fam120a	619.489	-2.47128	0.991339	-2.49287	0.0126715	0.0831332
ptpro__1	36.6099	5.85738	2.3509	2.49154	0.012719	0.0834013
grk1b	18.3546	8.09724	3.25044	2.49112	0.012734	0.0834561
selplg	1013.25	1.31662	0.528763	2.49	0.0127744	0.0836773
rps21	1520.79	-1.07581	0.432094	-2.48976	0.0127829	0.0836898
prodhb	26.264	-8.80098	3.53678	-2.48842	0.0128313	0.0839631
zgc:171566	65.7988	-6.99638	2.814	-2.48627	0.0129089	0.0844273
b4galt6	947.023	1.77299	0.713354	2.48543	0.0129397	0.0845843
trim35-22	30.5137	6.40962	2.58008	2.48427	0.0129816	0.0848144
foxg1c	30.0509	-5.44923	2.1943	-2.48335	0.0130152	0.08499
trrap	1636.69	1.155	0.465177	2.48294	0.0130305	0.0850456
rgs17	160.653	3.58975	1.4461	2.48237	0.0130511	0.0851362
tor4aa	300.439	-1.4925	0.602051	-2.47903	0.013174	0.0858932
hhip	97.42	-6.54216	2.64058	-2.47755	0.0132289	0.0862066
pcdh2ab11__2	21.8361	-8.34208	3.36979	-2.47555	0.0133031	0.0865347
aldh16a1	169.793	-4.36562	1.76356	-2.47545	0.0133067	0.0865347
myo10l3	199.654	-4.29212	1.734	-2.47527	0.0133136	0.0865347
keap1a	474.701	-1.72265	0.695762	-2.47592	0.0132893	0.0865347
zgc:158404	89.0676	3.79424	1.53283	2.47532	0.0133117	0.0865347
CABZ01070631.1	470.388	1.5012	0.606612	2.47473	0.0133335	0.0865751
zeb1b	310.753	4.24002	1.71327	2.47481	0.0133306	0.0865751
znf710b	210.931	-2.00058	0.809376	-2.47176	0.0134449	0.0872532
hdac8__2	754.372	1.63592	0.662273	2.47016	0.0135052	0.0875997
slc6a17	24.0542	5.87675	2.37942	2.46982	0.013518	0.0876374
odc1	856.494	-1.35614	0.549385	-2.46846	0.0135694	0.0878352
hsp70l	38520.6	1.00648	0.407679	2.4688	0.0135566	0.0878352
tmem120b	148.734	2.85272	1.15559	2.46863	0.0135632	0.0878352
bcl9	434.646	1.60774	0.651389	2.46817	0.0135806	0.0878624
sgk3	3569.68	1.16523	0.472223	2.46753	0.0136048	0.0879737
tspan4b	17.5446	-6.46628	2.62076	-2.46733	0.0136125	0.0879785
senp7b	359.569	1.34026	0.543288	2.46695	0.0136271	0.0880278
dnmt1	343.181	1.35994	0.551424	2.46623	0.0136543	0.0881582
slc2a10	54.0135	-7.04663	2.85837	-2.46527	0.0136911	0.0883056
si:ch211-269k10.2	19.9893	6.21027	2.51895	2.46542	0.0136854	0.0883056
chrac1	32.3418	-7.20246	2.92195	-2.46495	0.0137033	0.0883387
eif2s3	1115.98	-1.25085	0.50772	-2.46365	0.013753	0.0886139
pdcd6	367.162	-2.64069	1.07225	-2.46276	0.0137873	0.0887898
zmynd19	26.7041	-8.82499	3.5847	-2.46185	0.0138223	0.0889697
adam15	296.076	-2.94166	1.19608	-2.45942	0.013916	0.0895271
faslg	20.563	9.70233	3.94595	2.45881	0.0139399	0.0896353
rpl10a	2999.02	-1.31938	0.536714	-2.45826	0.0139612	0.0896975
CR382337.2	138.701	2.57106	1.04591	2.45819	0.0139639	0.0896975
zgc:153867	821.33	1.08547	0.441736	2.45729	0.0139991	0.0898778
FO704779.1	76.88	3.77908	1.53885	2.45578	0.014058	0.09021
si:ch1073-143l10.2	33.4088	-8.15092	3.32004	-2.45507	0.0140857	0.0902504
si:dkey-108k21.11	19.7486	-7.40256	3.01493	-2.4553	0.0140766	0.0902504
bcl6aa	209.53	2.02197	0.823549	2.45519	0.014081	0.0902504
si:ch211-251p5.5	17.6877	-6.09842	2.48649	-2.45262	0.014182	0.0908044
SLC46A3 (1 of many)	127.517	-5.00264	2.03996	-2.45232	0.0141938	0.0908044
wnk1a	2467.33	1.38256	0.563738	2.45248	0.0141876	0.0908044
mat2al	50.2291	7.16872	2.92549	2.45043	0.0142685	0.0912362
rasa1a	616.214	1.59474	0.651007	2.44965	0.0142996	0.0913882
stoml2	42.21	-4.56178	1.86325	-2.44828	0.0143538	0.0916883
rab1ab	556.561	-1.66918	0.681867	-2.44796	0.0143668	0.0917251
sc:d0202__2	13.5369	-7.5489	3.08489	-2.44706	0.0144028	0.0919081
hsd11b2	28.699	-8.62547	3.5261	-2.44618	0.0144379	0.0920274
mapk11	2063.59	-1.16063	0.474493	-2.44604	0.0144434	0.0920274
si:dkeyp-100a5.4	40.3692	5.28577	2.1607	2.44633	0.0144321	0.0920274
rpsa	3477.61	-1.23676	0.505707	-2.4456	0.0144611	0.0920937
rpl22l1	428.132	-2.385	0.975436	-2.44506	0.0144827	0.0921848
hddc2	52.6282	-7.78354	3.18594	-2.44309	0.0145622	0.0926435
nicn1	41.3043	4.34508	1.77953	2.4417	0.0146182	0.0929533
ppp1r9alb	65.575	5.40701	2.21557	2.44046	0.0146687	0.0932273
osbpl3b	97.9421	4.90383	2.01143	2.43798	0.0147695	0.0938206
si:dkey-3h2.2	596.68	1.78934	0.734027	2.4377	0.0147811	0.0938466
cdip1	58.2326	-6.74419	2.77173	-2.4332	0.0149659	0.0949725
snu13b	60.758	-4.40529	1.81123	-2.43221	0.0150072	0.0950947
CT009620.1	142.196	-2.83157	1.16421	-2.43219	0.0150078	0.0950947
rpl39	2267.44	-1.33073	0.547108	-2.43231	0.0150031	0.0950947
bco1l	166.836	-6.44658	2.65279	-2.43011	0.0150942	0.0955458
edaradd	169.332	2.89454	1.1911	2.43014	0.0150929	0.0955458
rreb1b	597.776	-1.2953	0.533408	-2.42835	0.0151677	0.0959629
frmd4ba	394.806	-1.96847	0.810842	-2.42769	0.0151954	0.0960417
susd6	1818.57	2.01296	0.829116	2.42784	0.0151891	0.0960417
mmp2	32.9398	-5.58899	2.30304	-2.42679	0.0152331	0.0962319
ptprdb	29.4653	-8.15068	3.36018	-2.42566	0.0152805	0.0964827
crtc1b	91.4607	2.8054	1.15665	2.42546	0.0152892	0.0964895
si:ch211-149b19.2	59.1316	5.99651	2.47316	2.42464	0.0153237	0.0966591
si:dkey-230p4.1	360.97	1.69227	0.698068	2.42422	0.0153412	0.0967209
[truncated: 11,664 more rows]

## Sheet: resultsDEG_mhc2dabcd45
	baseMean	log2FoldChange	lfcSE	stat	pvalue	padj
lgals3bpb	52642.4	-8.14227	0.358306	-22.7243	2.57558e-114	3.31425e-110
mrc1b	44432.3	-8.13718	0.382019	-21.3005	1.12418e-100	7.23298e-97
apoeb	54799.4	-8.66164	0.445289	-19.4517	2.81887e-84	1.20911e-80
ccl34b.1	15442.1	-6.97261	0.410365	-16.9912	9.53834e-65	3.06849e-61
havcr1	7402.83	-11.7648	0.693257	-16.9704	1.3603e-64	3.50087e-61
slco2b1	9177.42	-12.1855	0.744433	-16.3689	3.19151e-60	6.84472e-57
apoc1	49980.1	-8.16969	0.514453	-15.8803	8.67011e-57	1.59381e-53
actn1	6234.06	9.81886	0.634547	15.4738	5.2129e-54	8.38495e-51
crybg1a	5324.41	11.3558	0.760196	14.9379	1.86693e-50	2.66929e-47
sb:cb81	4518.92	-7.40132	0.519351	-14.2511	4.41335e-46	5.67909e-43
asap2b	2061.58	7.00208	0.502066	13.9465	3.30277e-44	3.86365e-41
entpd1	3826.84	-9.98431	0.726397	-13.745	5.45866e-43	5.8535e-40
slc3a2a	2983	-8.94182	0.651044	-13.7346	6.30187e-43	6.23788e-40
acsl4b	3868.74	-7.88913	0.58794	-13.4183	4.72731e-41	4.34507e-38
chl1a	9796.6	13.2333	1.00383	13.1829	1.10058e-39	9.44151e-37
trip10a	2116.47	-8.58206	0.663722	-12.9302	3.04061e-38	2.44541e-35
lgals9l1	9508.54	-9.7553	0.761057	-12.8181	1.29856e-37	9.82937e-35
tnfsf12	1986.04	-10.4205	0.823923	-12.6474	1.15638e-36	8.00042e-34
zmp:0000000936	3656.21	-11.3196	0.895135	-12.6457	1.18129e-36	8.00042e-34
si:dkey-126g1.7	2254.4	-5.06239	0.40444	-12.517	6.02451e-36	3.87617e-33
mtss1lb	871.579	-8.83483	0.736092	-12.0023	3.45387e-33	2.1164e-30
etv4	2372.82	-5.58235	0.466569	-11.9647	5.44037e-33	3.18212e-30
lgmn	4231.19	-5.80803	0.490012	-11.8528	2.08049e-32	1.16399e-29
lgals9l3	2084.62	-10.1646	0.858262	-11.8432	2.33266e-32	1.25069e-29
scn4bb	2147.04	-11.456	0.970333	-11.8062	3.62453e-32	1.86562e-29
ltb4r	2128.59	-10.358	0.883341	-11.726	9.38085e-32	4.6428e-29
csf1ra	18476.3	-7.48276	0.639008	-11.71	1.13345e-31	5.40195e-29
pdgfba	3878.17	-7.38517	0.635874	-11.6142	3.49048e-31	1.60412e-28
il6r	1324.25	-9.69784	0.839356	-11.5539	7.05392e-31	3.13e-28
stab1	12182.2	-8.3622	0.726886	-11.5041	1.25744e-30	5.39359e-28
wipf1a	2625.26	6.43055	0.568091	11.3196	1.04959e-29	4.35681e-27
ehd4	1439.5	-8.0942	0.716387	-11.2987	1.3325e-29	5.35831e-27
itgae.1	6410.57	-8.09279	0.717886	-11.2731	1.78203e-29	6.94884e-27
lamb1a	3819.01	-12.5988	1.13186	-11.1311	8.85528e-29	3.35146e-26
c1qc	1613.08	-10.9785	0.988511	-11.1061	1.17165e-28	4.30764e-26
agpat3	1812.2	4.58796	0.419622	10.9336	7.96678e-28	2.84768e-25
cd22	1838.78	-11.0471	1.02079	-10.822	2.70675e-27	9.41364e-25
pmaip1	1530.65	-5.07117	0.472569	-10.7311	7.27522e-27	2.46362e-24
selenop	1696.85	-5.86332	0.548122	-10.6971	1.05012e-26	3.46485e-24
cebpa	7066.21	-7.30257	0.685783	-10.6485	1.77178e-26	5.69981e-24
ppfibp1a	1047.85	-10.2698	0.969033	-10.598	3.04324e-26	9.33858e-24
rac1a	1685.76	-8.78523	0.828961	-10.5979	3.04803e-26	9.33858e-24
BX539336.1	1744.78	-10.2507	0.97761	-10.4855	1.00694e-25	3.01334e-23
eepd1	1421.37	-10.8742	1.04265	-10.4294	1.82041e-25	5.32387e-23
slc2a6	687.135	-9.13475	0.876839	-10.4178	2.05623e-25	5.87989e-23
zeb2a	2919.49	-5.91454	0.572599	-10.3293	5.19377e-25	1.4529e-22
CU984600.1	812.748	7.01983	0.681833	10.2955	7.38148e-25	2.02096e-22
snx33	2998.92	-6.07361	0.590539	-10.2849	8.2458e-25	2.21056e-22
csf1rb	16970.4	-6.53563	0.636625	-10.266	1.00229e-24	2.63212e-22
fes	2814.91	4.65194	0.457561	10.1668	2.78855e-24	7.17661e-22
setx	5522.92	4.11192	0.410559	10.0154	1.30414e-23	3.29053e-21
rgl1	1143.61	-9.17438	0.920825	-9.96321	2.20811e-23	5.39737e-21
nfil3-6	3728.58	-5.50961	0.553033	-9.96254	2.22304e-23	5.39737e-21
slc30a1a	2190.66	-5.24304	0.532299	-9.8498	6.86804e-23	1.63663e-20
CABZ01054965.1	1004.25	-6.41457	0.655181	-9.79053	1.23642e-22	2.89276e-20
stoml3b	697.883	-8.82472	0.903095	-9.77164	1.49019e-22	3.42424e-20
mpp1	6827.03	-4.95914	0.515161	-9.62639	6.1864e-22	1.39661e-19
cmtm7	1329.13	9.24508	0.963476	9.59555	8.34726e-22	1.85194e-19
mfap4	332.066	-8.25152	0.860477	-9.58947	8.85361e-22	1.93099e-19
crim1	3637.42	3.44483	0.364172	9.45934	3.09892e-21	6.64614e-19
mgst1.2	540.321	-7.78391	0.824765	-9.43774	3.80907e-21	8.03526e-19
nav3	7045.58	3.57309	0.379216	9.42231	4.41287e-21	9.15884e-19
gria4b	3868.25	14.902	1.59307	9.3543	8.41554e-21	1.71891e-18
mafbb	2665.06	-5.34704	0.571943	-9.3489	8.8567e-21	1.78075e-18
ngfrb	1694.45	-11.6936	1.25249	-9.33624	9.98145e-21	1.97602e-18
abca2	2596.89	3.901	0.41793	9.33411	1.01848e-20	1.98572e-18
zgc:171686	2655.17	14.3597	1.54484	9.29526	1.46851e-20	2.82041e-18
cx43	1330.07	-4.64121	0.503324	-9.22111	2.94034e-20	5.56417e-18
mical3a__2	2518.86	14.2721	1.54949	9.21087	3.23501e-20	6.03306e-18
tmem63ba	2028.94	-4.56633	0.496003	-9.20625	3.37717e-20	6.2082e-18
si:ch211-222k6.3	1734.72	-14.7437	1.60533	-9.18418	4.14673e-20	7.5155e-18
dgkg	2155.38	14.0584	1.5335	9.16755	4.83877e-20	8.64796e-18
si:dkey-56f14.7	1009.41	-10.6846	1.18261	-9.03474	1.64391e-19	2.89778e-17
sema6e	1556.86	11.1159	1.23647	8.98998	2.47265e-19	4.29973e-17
si:ch211-283g2.2__1	594.776	-10.4124	1.1588	-8.98545	2.57677e-19	4.42106e-17
pik3ap1	2798.08	4.49146	0.500525	8.9735	2.87246e-19	4.86352e-17
mast1a	1568.5	-13.8333	1.5518	-8.91437	4.90594e-19	8.19865e-17
pfkfb3	4669.51	3.29556	0.371941	8.86045	7.9695e-19	1.31476e-16
crip2	688.792	-8.19512	0.928031	-8.83065	1.04067e-18	1.69511e-16
rbfox1l	869.284	-10.8258	1.22663	-8.82568	1.08793e-18	1.74994e-16
sema4ab	6594.17	3.07858	0.349434	8.81017	1.24954e-18	1.98508e-16
ccl19a.1	10567.8	6.14285	0.698239	8.79762	1.39744e-18	2.19296e-16
csf3r	5597.05	-7.46952	0.849212	-8.79582	1.42008e-18	2.20164e-16
si:ch211-209f23.6	928.79	-5.92943	0.674391	-8.79228	1.46554e-18	2.24507e-16
fam198b	767.834	-9.27487	1.05732	-8.77207	1.75419e-18	2.65563e-16
znf366	1834.55	4.28527	0.48908	8.76189	1.92002e-18	2.87288e-16
havcr2	2462.99	-12.9609	1.48571	-8.72366	2.69349e-18	3.98389e-16
slc29a1b	1129.09	-5.50919	0.631686	-8.72141	2.74755e-18	4.01767e-16
dapk1	1924.02	-5.19327	0.596873	-8.7008	3.29552e-18	4.76481e-16
atp1b1a	4543.99	-3.92181	0.451286	-8.6903	3.61489e-18	5.16849e-16
mertka	2733.79	-12.9833	1.49428	-8.68867	3.66713e-18	5.18556e-16
jun	1786.78	-3.65792	0.423307	-8.64129	5.55824e-18	7.77428e-16
tbc1d10b	4478.13	3.54693	0.41124	8.62498	6.41059e-18	8.87006e-16
si:ch73-86n18.1	2496.85	-13.2384	1.54085	-8.59161	8.57573e-18	1.17396e-15
igsf9ba	2760.31	-3.4272	0.399061	-8.58817	8.83633e-18	1.1969e-15
card9	825.673	-4.09493	0.477114	-8.5827	9.26731e-18	1.24221e-15
slc1a3a	2255.1	-8.63148	1.00588	-8.58101	9.40472e-18	1.24763e-15
arhgap27	1875.79	-4.85094	0.566214	-8.56733	1.05911e-17	1.39067e-15
si:ch211-74m13.3	3552.4	-5.93111	0.692499	-8.56479	1.0827e-17	1.40729e-15
ctsla	710.424	-7.82094	0.913587	-8.5607	1.12184e-17	1.44358e-15
alox5ap	2174.72	-7.64204	0.893769	-8.55035	1.22715e-17	1.56347e-15
gnpda1	342.627	-7.10515	0.834809	-8.51111	1.72269e-17	2.17329e-15
slc22a21	2345	-5.38098	0.634269	-8.48374	2.1806e-17	2.72426e-15
vmp1	2297.41	-3.3107	0.390499	-8.47812	2.2886e-17	2.8317e-15
pla2r1	730.946	-10.0568	1.18666	-8.47488	2.3532e-17	2.8839e-15
CMKLR1 (1 of many)__2	1672.25	11.254	1.34819	8.3475	6.97227e-17	8.46407e-15
cntfr	804.837	10.1967	1.22307	8.33699	7.62063e-17	9.1647e-15
si:ch73-380l3.3	746.831	-12.8201	1.54339	-8.30648	9.85817e-17	1.17458e-14
arhgap15	1363.56	-4.9638	0.59984	-8.27521	1.28231e-16	1.51383e-14
si:dkey-5n18.1	499.395	-8.81828	1.06579	-8.27396	1.29584e-16	1.51589e-14
dok4	855.449	-7.70321	0.934536	-8.24282	1.68202e-16	1.94993e-14
fgd4a	920.861	7.43049	0.905601	8.20504	2.30513e-16	2.64843e-14
rgs5b	457.248	-9.22994	1.12539	-8.20154	2.37331e-16	2.69792e-14
zgc:153184	773.205	-12.7544	1.55528	-8.20069	2.39013e-16	2.69792e-14
arhgap12a	348.549	-5.44084	0.665406	-8.17672	2.91665e-16	3.2636e-14
mcamb	8484.71	-9.04411	1.11062	-8.14332	3.84575e-16	4.26613e-14
si:dkeyp-23e4.3	1279.03	-12.3987	1.52467	-8.13206	4.22041e-16	4.64173e-14
igf2b	488.041	-8.93034	1.10099	-8.11117	5.01336e-16	5.46711e-14
EML5	942.359	12.8646	1.5883	8.0996	5.5139e-16	5.96242e-14
fgf12a	866.321	12.7432	1.5748	8.09195	5.8717e-16	6.29642e-14
sdc4	3247.15	-4.61599	0.570731	-8.08785	6.07252e-16	6.45795e-14
il4r.2	840.839	-8.92209	1.10336	-8.0863	6.15039e-16	6.48715e-14
hhipl1	873.933	-13.2802	1.64868	-8.05505	7.94469e-16	8.31157e-14
si:ch211-160f23.5	133.284	-22.7288	2.82828	-8.03626	9.26223e-16	9.6118e-14
mpzl2b	897.666	-13.0159	1.62352	-8.01712	1.08254e-15	1.11441e-13
loxl3a	131.712	-22.3402	2.79081	-8.00493	1.19532e-15	1.22075e-13
CABZ01079192.1	1214.19	-12.3231	1.54007	-8.00161	1.22802e-15	1.24427e-13
dicp3.1	921.423	-6.32824	0.791815	-7.99207	1.32692e-15	1.33397e-13
fndc3bb	675.406	-10.3574	1.29669	-7.98753	1.37665e-15	1.37323e-13
rassf2a	2386.3	-4.22928	0.52973	-7.98385	1.41838e-15	1.40398e-13
lrp5	446.409	-9.90796	1.24538	-7.95578	1.78012e-15	1.74859e-13
znf609b	399.046	-9.52293	1.19793	-7.9495	1.87261e-15	1.82552e-13
ttn.2	6147.92	7.44071	0.939174	7.9226	2.32587e-15	2.25032e-13
si:dkey-222f2.7	637.772	-12.328	1.55983	-7.90347	2.71234e-15	2.60466e-13
si:dkey-225f5.5	108.956	-22.9705	2.91424	-7.88216	3.21773e-15	3.06709e-13
kcnh1a__2	1178.02	10.0842	1.28103	7.87198	3.49063e-15	3.30275e-13
rbfa	109.499	-22.7308	2.89008	-7.86512	3.68743e-15	3.46349e-13
plxnb1a	1635.53	-4.87649	0.62051	-7.85884	3.87715e-15	3.6153e-13
trpc5a	115.533	-22.9447	2.92386	-7.8474	4.24738e-15	3.93203e-13
smad6b	119.623	-22.3178	2.8445	-7.84593	4.29762e-15	3.95012e-13
arhgap5	474.973	-4.32201	0.552579	-7.82153	5.21864e-15	4.76265e-13
frmd4bb	3132.76	13.1724	1.69008	7.79396	6.49386e-15	5.88472e-13
ctsd	2316.26	-3.73923	0.48066	-7.77937	7.28841e-15	6.55855e-13
prkcba	4050.08	5.19139	0.667588	7.77634	7.46522e-15	6.671e-13
zgc:101810	499.959	9.51293	1.22672	7.75479	8.84882e-15	7.85287e-13
abi1b	1796.51	-6.16001	0.799567	-7.70419	1.31678e-14	1.16057e-12
ccr12a	2586.7	-6.3972	0.831018	-7.69803	1.38183e-14	1.20962e-12
kcnk18	1121.14	11.6701	1.51627	7.6966	1.39737e-14	1.21496e-12
si:ch1073-392o20.2	4191.11	-3.26076	0.424135	-7.68802	1.49431e-14	1.29053e-12
adgrd2	622.997	-12.4192	1.62063	-7.66322	1.81334e-14	1.55561e-12
aldh8a1	402.816	-8.1213	1.06154	-7.65048	2.00229e-14	1.70632e-12
map4k6	1909.62	4.84083	0.633357	7.64313	2.12008e-14	1.79481e-12
adap2	639.553	-12.2855	1.60816	-7.63948	2.18106e-14	1.83437e-12
si:dkeyp-94g1.1	976.93	11.4763	1.50429	7.62905	2.36498e-14	1.97614e-12
p2ry12	726.486	-8.13123	1.06709	-7.62001	2.53653e-14	2.10581e-12
mmd2a	90.5839	-22.1177	2.9096	-7.60163	2.9243e-14	2.39933e-12
cass4	535.794	-6.5589	0.862843	-7.60149	2.92737e-14	2.39933e-12
si:dkey-240h12.4	502.887	11.9147	1.57063	7.58593	3.30109e-14	2.68851e-12
ctnnd2a	810.441	12.6408	1.66744	7.581	3.42895e-14	2.77507e-12
si:ch211-195b15.7	101.088	-22.7147	3.00949	-7.54768	4.43093e-14	3.56358e-12
slc12a7b	563.673	8.7456	1.15905	7.54548	4.50628e-14	3.60167e-12
nitr10a	477.613	-12.4887	1.65562	-7.54321	4.58552e-14	3.62768e-12
arhgef10	971.092	-4.27891	0.567274	-7.54293	4.59521e-14	3.62768e-12
ephb2a	92.443	-22.1896	2.94435	-7.53631	4.83447e-14	3.79329e-12
si:ch211-217k17.11	93.7016	-22.2189	2.94966	-7.53272	4.96941e-14	3.87554e-12
trim3b	799.158	12.6235	1.67745	7.52538	5.25679e-14	4.07496e-12
si:ch211-196f2.3	117.405	-22.6018	3.01082	-7.50688	6.05524e-14	4.6658e-12
arvcfb	1930.71	8.2986	1.10674	7.49826	6.46728e-14	4.95363e-12
ptprja	16394.5	3.67135	0.489691	7.49728	6.51579e-14	4.96125e-12
itga5	83.8499	-22.186	2.96072	-7.49345	6.70843e-14	5.07789e-12
CABZ01044156.1	1178.12	-4.30053	0.574767	-7.4822	7.30878e-14	5.49997e-12
appb	1234.39	-5.19088	0.694038	-7.47925	7.47484e-14	5.59223e-12
kdm2ba	2181.48	6.01782	0.806543	7.46125	8.57056e-14	6.37491e-12
trib3	1400.39	-3.9438	0.52919	-7.45252	9.15763e-14	6.77243e-12
plpp3	1623.16	8.85223	1.18805	7.45106	9.25958e-14	6.8087e-12
naprt	77.7007	-22.2427	2.99008	-7.43884	1.0157e-13	7.42613e-12
ctnna1	806.889	-7.60799	1.02305	-7.43659	1.03317e-13	7.51118e-12
pdk2b	4092.07	-5.84689	0.78758	-7.42387	1.13746e-13	8.22295e-12
mafba	3242.06	-6.05925	0.816956	-7.41687	1.19924e-13	8.57926e-12
pkig	334.253	-12.0053	1.61866	-7.41677	1.20008e-13	8.57926e-12
si:ch211-281g13.4	81.6687	-21.8477	2.94962	-7.40697	1.2922e-13	9.18676e-12
si:ch1073-345a8.1__1	82.2751	-22.3518	3.02183	-7.39677	1.39542e-13	9.86606e-12
zmp:0000001139	2040.6	5.28183	0.71577	7.37923	1.59202e-13	1.1163e-11
col5a1	703.455	-9.85285	1.33529	-7.3788	1.59721e-13	1.1163e-11
def6a	2687.9	4.41339	0.598169	7.37816	1.60488e-13	1.1163e-11
pim3	75.9868	-21.9175	2.97133	-7.37634	1.62702e-13	1.12562e-11
si:ch73-27e22.6	2439.03	3.92087	0.531954	7.3707	1.69739e-13	1.16802e-11
BX897691.1	2755.73	3.16105	0.42891	7.36996	1.70675e-13	1.16821e-11
arhgef16	330.745	-11.9494	1.62655	-7.34647	2.03513e-13	1.38561e-11
pdgfd	850.308	-11.4386	1.55794	-7.34213	2.10215e-13	1.42371e-11
nrxn2a	801.49	12.6302	1.72584	7.31825	2.51217e-13	1.69249e-11
gpr132b	74.4727	-22.2704	3.04513	-7.31347	2.60325e-13	1.74472e-11
CABZ01064472.1	94.5531	22.9176	3.13437	7.31172	2.63745e-13	1.75848e-11
ppp1r14bb	333.144	6.79452	0.929958	7.30627	2.7467e-13	1.81163e-11
yes1	934.789	-3.98872	0.545972	-7.30573	2.75763e-13	1.81163e-11
cobl	379.865	-8.9623	1.22676	-7.30564	2.7594e-13	1.81163e-11
nitr12	69.9694	-22.1463	3.03204	-7.3041	2.79135e-13	1.8233e-11
adam19a	70.9714	-22.1337	3.03139	-7.30152	2.84539e-13	1.84921e-11
pex11a	72.8348	-22.2672	3.05491	-7.28899	3.12287e-13	2.01935e-11
BX323861.3	346.963	-12.4013	1.7029	-7.28242	3.27875e-13	2.10955e-11
spag1a	2142.05	3.36194	0.461916	7.27825	3.38178e-13	2.16501e-11
arhgap12b	19228.5	2.71045	0.372956	7.26747	3.66275e-13	2.33328e-11
si:ch211-119e14.1	432.63	11.7244	1.61428	7.26295	3.78747e-13	2.40084e-11
qrsl1	382.948	11.5013	1.58469	7.25778	3.93492e-13	2.48209e-11
c1qa	449.956	-9.13134	1.25998	-7.2472	4.25464e-13	2.67067e-11
atp2a3	3261	2.68908	0.371101	7.24623	4.28544e-13	2.67694e-11
p4ha1a	394.03	-11.4742	1.58391	-7.24423	4.34893e-13	2.70348e-11
rab7b	601.496	-3.63269	0.501581	-7.24248	4.40558e-13	2.72553e-11
timp4.3	982.15	-7.09856	0.980456	-7.24006	4.48502e-13	2.7614e-11
rgl2	3544.84	3.24486	0.448294	7.23823	4.54572e-13	2.78545e-11
si:dkey-34e4.1	608.981	-11.1286	1.53927	-7.22976	4.83852e-13	2.95081e-11
zdhhc4	72.2949	-22.032	3.05278	-7.21701	5.31431e-13	3.22569e-11
sc:d156	373.334	-11.8602	1.6437	-7.21554	5.37222e-13	3.24553e-11
si:dkey-102c8.3	955.755	4.84157	0.67245	7.1999	6.02575e-13	3.62334e-11
pnpla3	992.835	12.9372	1.79868	7.19262	6.35592e-13	3.78967e-11
si:ch211-186j3.6	1069.41	-11.487	1.59708	-7.19251	6.36127e-13	3.78967e-11
si:dkey-33c9.6	5082.35	3.16273	0.439772	7.19174	6.3972e-13	3.79351e-11
znf804a	483.123	11.8919	1.6541	7.18934	6.51067e-13	3.84309e-11
mfsd6b	433.396	11.7342	1.63249	7.18792	6.57859e-13	3.86545e-11
tnfaip2b	67.5556	-22.0421	3.07394	-7.17063	7.4653e-13	4.35609e-11
ctsz	1397.54	-3.78605	0.528016	-7.17034	7.48131e-13	4.35609e-11
dhrs9	806.652	-11.4599	1.60263	-7.15066	8.63612e-13	5.00584e-11
rras2	472.429	8.13432	1.13856	7.14442	9.03787e-13	5.21522e-11
ctsc	4838.33	-2.56555	0.359803	-7.13044	1.00047e-12	5.74736e-11
si:ch211-225b11.1	320.7	-8.90406	1.24896	-7.12916	1.0098e-12	5.74997e-11
dpp7	755.569	-3.55326	0.498412	-7.12916	1.00986e-12	5.74997e-11
tlr5a	330.939	-11.8921	1.66854	-7.12726	1.02387e-12	5.80404e-11
fcer1gl	6352.16	-6.65097	0.933729	-7.12302	1.05584e-12	5.95687e-11
adgrl1a	517.257	6.73355	0.945396	7.12247	1.06009e-12	5.95687e-11
arhgap4b	8294.9	2.93896	0.414414	7.09185	1.32328e-12	7.40345e-11
fam13a	838.229	-4.6013	0.648872	-7.09122	1.32932e-12	7.40503e-11
peli1a	308.178	-12.0529	1.70772	-7.05787	1.69068e-12	9.37746e-11
si:ch73-52p7.1	344.384	-12.2063	1.73332	-7.04219	1.89246e-12	1.04516e-10
siglec15l	10339.5	7.52316	1.07047	7.02788	2.09688e-12	1.1531e-10
ptpn18	3627.62	2.83396	0.403335	7.02632	2.1205e-12	1.16015e-10
abi3a	4039.91	2.77801	0.395399	7.02585	2.12773e-12	1.16015e-10
si:ch73-141c7.1	62.5868	-21.9662	3.12933	-7.01947	2.22706e-12	1.20919e-10
grin3a	607.153	-11.4607	1.63336	-7.01663	2.27289e-12	1.22889e-10
arhgef3	860.36	8.0921	1.15353	7.01511	2.29773e-12	1.23712e-10
roraa	446.579	8.21484	1.17187	7.01004	2.38258e-12	1.27746e-10
CMKLR1 (1 of many)__1	437.931	11.7597	1.67878	7.00491	2.47149e-12	1.31963e-10
si:dkeyp-9d4.3	319.336	-11.4668	1.63826	-6.99936	2.57126e-12	1.36723e-10
swap70b	1850.47	-3.38163	0.483751	-6.99043	2.74041e-12	1.45118e-10
lzts2a	437.088	-11.2495	1.61155	-6.98058	2.9396e-12	1.55028e-10
il10ra	2473.59	-4.41698	0.633961	-6.96727	3.23154e-12	1.69728e-10
stambpl1	358.393	11.387	1.63795	6.95202	3.60095e-12	1.88362e-10
2012-09-01	2502.11	3.11027	0.447576	6.94913	3.67548e-12	1.91482e-10
CABZ01088484.1	570.666	-11.1487	1.60644	-6.94003	3.92004e-12	2.02749e-10
insrb	1656.54	-7.23495	1.04258	-6.93947	3.93577e-12	2.02749e-10
krt8	947.119	-5.24134	0.755306	-6.93935	3.93901e-12	2.02749e-10
RTKN	58.6773	-22.0062	3.18469	-6.90998	4.84716e-12	2.48499e-10
si:ch211-51h4.2	784.048	11.162	1.61556	6.90903	4.87979e-12	2.49179e-10
tbc1d16	792.211	-3.86972	0.560188	-6.90789	4.91903e-12	2.5019e-10
prkcab	448.15	-5.10166	0.738794	-6.90538	5.00679e-12	2.53651e-10
cbfa2t3	434.267	-5.95153	0.862375	-6.90132	5.15221e-12	2.59995e-10
abca1b	4032.41	-4.6399	0.672484	-6.89964	5.21343e-12	2.62057e-10
il4r.1	859.25	-11.2108	1.62645	-6.89284	5.46907e-12	2.73836e-10
zgc:77486__1	454.352	-9.51319	1.38089	-6.88918	5.6113e-12	2.79869e-10
ncam1a	712.734	10.9999	1.59879	6.88012	5.98018e-12	2.97115e-10
slc43a2b	1206.22	-6.88744	1.00121	-6.87913	6.02188e-12	2.98037e-10
fam43a	982.046	-4.97548	0.724357	-6.86882	6.4735e-12	3.19161e-10
kazald3	589.864	10.7385	1.56483	6.8624	6.77153e-12	3.3258e-10
FO907110.1	2415.48	-8.5819	1.25365	-6.84552	7.61983e-12	3.72821e-10
renbp	320.734	-7.20174	1.05242	-6.84301	7.75478e-12	3.77987e-10
fbxo41	977.734	-6.71352	0.981805	-6.83794	8.03387e-12	3.90113e-10
si:dkey-92f12.2	323.913	7.2085	1.05622	6.82481	8.80401e-12	4.25902e-10
xpnpep2	256.146	-11.1574	1.6383	-6.81036	9.73522e-12	4.66954e-10
sdcbp2	2818.77	-2.76815	0.406502	-6.80968	9.78186e-12	4.66954e-10
grb10b	887.476	-3.25672	0.478251	-6.80965	9.78397e-12	4.66954e-10
hamp	527.709	-12.6159	1.85271	-6.80944	9.79777e-12	4.66954e-10
calm1b	306.369	11.2224	1.65063	6.79889	1.05429e-11	5.00615e-10
gadd45ga	756.349	-5.42421	0.798233	-6.79528	1.08104e-11	5.11427e-10
adcy7	2286.93	-4.79849	0.706357	-6.79329	1.09602e-11	5.16616e-10
tmem178b	307.063	-12.1212	1.78447	-6.79258	1.10142e-11	5.17266e-10
brinp3b	344.792	-10.633	1.56676	-6.78663	1.14784e-11	5.37107e-10
clic5b	572.09	-10.9925	1.6205	-6.78341	1.17372e-11	5.47226e-10
zgc:64189	371.6	-11.5378	1.70416	-6.77037	1.28453e-11	5.96729e-10
syngap1b	776.136	-5.05655	0.751044	-6.73269	1.66551e-11	7.70925e-10
tpcn1	2512.12	3.51829	0.522812	6.72955	1.70188e-11	7.84939e-10
hipk3b	3040.65	3.70851	0.55136	6.72612	1.74246e-11	8.00785e-10
il12rb2l	13256.4	3.38066	0.505213	6.69155	2.20816e-11	1.01119e-09
dennd5b	1681.47	-5.51752	0.824831	-6.68927	2.24289e-11	1.02346e-09
CHST13	823.716	-6.65891	0.996508	-6.68225	2.35301e-11	1.06928e-09
dact1	3401.24	-8.40144	1.25736	-6.68182	2.35993e-11	1.06928e-09
dia1b	286.104	11.0791	1.65983	6.67485	2.47491e-11	1.11744e-09
cdc42se2	808.856	-5.30792	0.795336	-6.67381	2.49241e-11	1.12141e-09
CABZ01117603.1	304.186	11.2214	1.68159	6.67306	2.50524e-11	1.12325e-09
rasgrp3	377.88	11.5173	1.72828	6.66401	2.66454e-11	1.19053e-09
phldb1b	176.8	-7.14873	1.07355	-6.65897	2.75761e-11	1.22785e-09
p2rx7	2958.92	2.52661	0.379937	6.65008	2.92934e-11	1.29982e-09
rbm38	276.523	8.33604	1.25639	6.63492	3.24676e-11	1.43571e-09
mylipb	517.63	7.60521	1.14822	6.62346	3.50897e-11	1.54635e-09
grinab	332.451	-11.6931	1.76589	-6.62161	3.55311e-11	1.56046e-09
lta4h	2522.03	-7.25626	1.09597	-6.62084	3.57175e-11	1.56331e-09
sh3pxd2b	478.078	-11.1421	1.68517	-6.61188	3.79473e-11	1.65527e-09
sntb1	345.948	11.4196	1.72778	6.60942	3.85839e-11	1.67736e-09
si:ch211-106a19.1	810.493	-6.69605	1.01561	-6.59312	4.30672e-11	1.86596e-09
zgc:153911	488.299	-11.5827	1.75693	-6.59258	4.32259e-11	1.86655e-09
id1	268.767	-8.71867	1.32373	-6.58645	4.50468e-11	1.93867e-09
pcdh7b	1608.78	12.1644	1.85433	6.56001	5.38048e-11	2.30787e-09
snphb	279.167	-11.1946	1.70722	-6.55725	5.4809e-11	2.34313e-09
slc24a3	928.358	-6.04454	0.922042	-6.55561	5.54162e-11	2.36125e-09
xcr1b.1	217.127	-11.8484	1.81101	-6.5424	6.05384e-11	2.57098e-09
orai1a	341.489	5.28881	0.808683	6.54003	6.15073e-11	2.60354e-09
camkk1a	1695.91	2.67557	0.409139	6.53953	6.17143e-11	2.60374e-09
h1f0	1505.86	-4.77567	0.730673	-6.53599	6.31892e-11	2.65725e-09
coro1b	249.667	10.9354	1.67493	6.52889	6.62583e-11	2.77724e-09
dab2ipa	455.868	10.3762	1.59148	6.51985	7.03774e-11	2.94031e-09
evla	670.458	-10.9998	1.68929	-6.51151	7.43978e-11	3.09822e-09
sgk1	1908.8	-6.10432	0.939198	-6.4995	8.05887e-11	3.34521e-09
si:ch211-283g2.2__2	203.961	-11.0384	1.69893	-6.49725	8.17998e-11	3.38456e-09
impdh1b	325.473	7.50758	1.15612	6.49379	8.37032e-11	3.45222e-09
CABZ01102038.1	637.106	10.869	1.67552	6.48692	8.7607e-11	3.60168e-09
ncf2	1871.44	-3.9565	0.610284	-6.48305	8.98894e-11	3.68375e-09
si:dkey-9c18.3	475.97	10.4164	1.61393	6.45409	1.08869e-10	4.4474e-09
marco	2236.07	-7.25111	1.12596	-6.43996	1.19503e-10	4.86632e-09
agpat4	317.982	-9.00598	1.39912	-6.4369	1.21941e-10	4.94996e-09
si:dkey-65j6.2	402.295	-12.1133	1.88291	-6.4333	1.24859e-10	5.05247e-09
cep170b	339.343	11.2992	1.75724	6.43008	1.27535e-10	5.14459e-09
plxna3	2460.88	5.16336	0.803721	6.42433	1.32454e-10	5.32633e-09
CR385050.1	435.137	7.57515	1.17992	6.42006	1.36217e-10	5.46057e-09
lrp1ab	2910.93	-7.17823	1.11857	-6.41732	1.38693e-10	5.54255e-09
net1	1564.38	6.99511	1.09057	6.41419	1.41571e-10	5.64004e-09
SCARF2	379.367	-8.54829	1.33356	-6.41015	1.45374e-10	5.77369e-09
BX120005.1	549.492	-4.95481	0.773986	-6.40167	1.53685e-10	6.08496e-09
tjap1	437.302	-3.77501	0.590148	-6.39671	1.58763e-10	6.26674e-09
sulf2b	1705.12	-2.90636	0.454448	-6.39537	1.60163e-10	6.30267e-09
si:ch73-334d15.1	261.096	10.7614	1.68321	6.39339	1.62246e-10	6.3652e-09
rb1	266.565	10.8602	1.70176	6.38175	1.75078e-10	6.84774e-09
dicp1.1__1	534.527	-5.30349	0.832163	-6.37314	1.85195e-10	7.2215e-09
si:ch73-177h5.2	208.68	8.18772	1.28595	6.36707	1.92675e-10	7.49048e-09
si:dkeyp-123h10.2	183.067	-10.7361	1.68849	-6.35842	2.03839e-10	7.90059e-09
tmem178	536.32	12.0519	1.8958	6.35716	2.05514e-10	7.94161e-09
si:ch211-114l13.12	280.73	11.1096	1.74796	6.35578	2.07371e-10	7.98938e-09
fer	1149.46	7.74021	1.21934	6.34785	2.1834e-10	8.38688e-09
ehbp1l1b	14133.7	2.88752	0.455393	6.34072	2.28688e-10	8.75822e-09
fnbp1l	631.35	4.41284	0.69656	6.33519	2.37047e-10	9.05139e-09
znf385a	1510.93	8.54633	1.34962	6.33239	2.41393e-10	9.19008e-09
id2a	1932.27	3.27785	0.518361	6.32349	2.55715e-10	9.70661e-09
si:ch211-193e13.5	234.51	-10.4425	1.65809	-6.29794	3.01628e-10	1.14157e-08
pmepa1	439.618	-4.04271	0.642289	-6.29422	3.08947e-10	1.16584e-08
trps1	1038.14	-3.97249	0.631205	-6.2935	3.10396e-10	1.16789e-08
fam57ba	198.044	10.5018	1.67082	6.28544	3.26931e-10	1.22651e-08
atp13a3	1716.09	-2.87127	0.456854	-6.28488	3.28103e-10	1.22734e-08
entpd2a.1	1336.71	-7.0174	1.11671	-6.28397	3.30025e-10	1.23095e-08
g0s2	151.294	-10.9568	1.74553	-6.27704	3.45075e-10	1.28336e-08
si:dkeyp-117b11.1	1159.32	11.7429	1.87125	6.2754	3.48743e-10	1.29326e-08
itprid1	303.387	-10.3563	1.65044	-6.27487	3.4993e-10	1.29394e-08
tmem206	216.68	-10.4129	1.66165	-6.26656	3.69113e-10	1.36096e-08
ctsa	2870.77	-2.4999	0.399667	-6.25497	3.97605e-10	1.46182e-08
plbd1	687.869	-6.0573	0.969817	-6.24582	4.21591e-10	1.5456e-08
RASGRP2	184.917	10.4943	1.68164	6.24056	4.36005e-10	1.59389e-08
b4galt1	288.354	-11.2606	1.80517	-6.23795	4.43335e-10	1.6161e-08
esrra	709.562	-3.35686	0.539321	-6.22424	4.83903e-10	1.759e-08
si:dkey-216e24.9	1549.87	4.34154	0.697863	6.22118	4.93417e-10	1.78853e-08
si:dkey-69o16.5	185.924	-11.1011	1.78862	-6.20654	5.41638e-10	1.95781e-08
myt1b	913.686	3.81256	0.614359	6.20574	5.44391e-10	1.96225e-08
tgm2l	7824	-7.33714	1.18247	-6.20495	5.47136e-10	1.96663e-08
pard6a	307.753	6.51215	1.05009	6.20153	5.5916e-10	2.00426e-08
si:ch73-380l3.4	352.027	-12.2294	1.97482	-6.19269	5.91478e-10	2.1142e-08
acana	219.673	-11.5342	1.86435	-6.18671	6.14347e-10	2.18987e-08
mical1	600.838	-5.06724	0.819703	-6.1818	6.33738e-10	2.25078e-08
tcima	13124.7	-2.47977	0.40116	-6.1815	6.34935e-10	2.25078e-08
shc2	240.131	-4.67976	0.757555	-6.17745	6.51434e-10	2.30293e-08
fosb	1675.03	-3.76968	0.610616	-6.17357	6.67633e-10	2.35373e-08
slc20a1b	10415.2	-2.23583	0.362478	-6.16818	6.90802e-10	2.42875e-08
prkcha	727.853	6.0047	0.973729	6.1667	6.97288e-10	2.44488e-08
phactr4b	249.349	-8.59833	1.39528	-6.16243	7.16355e-10	2.50491e-08
ddr2a	570.656	-10.0553	1.63188	-6.16178	7.19325e-10	2.50847e-08
si:ch211-204c21.1__1	5564.06	-3.8013	0.617716	-6.1538	7.56475e-10	2.6309e-08
hrasb	221.17	10.7506	1.74831	6.14914	7.79033e-10	2.70205e-08
mmp14b	2667.9	-3.72808	0.606387	-6.14801	7.84605e-10	2.71406e-08
MPRIP	992.38	-2.58312	0.4203	-6.14591	7.95058e-10	2.74284e-08
dock4b	7941.47	-3.37461	0.549582	-6.14032	8.23571e-10	2.83361e-08
ophn1	409.487	-3.844	0.62647	-6.13597	8.46435e-10	2.90451e-08
syngr3b	898.742	3.69673	0.60266	6.13402	8.5685e-10	2.93243e-08
cyth4b	326.653	3.83092	0.625081	6.12867	8.86155e-10	3.02468e-08
tpcn3	555.324	-11.9594	1.9529	-6.12391	9.13066e-10	3.10829e-08
ctsba	4662.29	-2.85695	0.466637	-6.12243	9.21597e-10	3.12905e-08
bphl	192.19	10.5033	1.71727	6.11629	9.57802e-10	3.24342e-08
mrtfaa	3776.31	3.11431	0.50922	6.11584	9.60483e-10	3.24396e-08
slc16a9a	222.13	-7.72365	1.26597	-6.10097	1.05427e-09	3.54855e-08
si:ch211-113g11.6	941.808	8.96849	1.47008	6.10068	1.05618e-09	3.54855e-08
ank2b	2364.07	6.89494	1.1306	6.09846	1.07092e-09	3.5887e-08
sptbn5	136.252	-10.7262	1.76019	-6.09377	1.10279e-09	3.6859e-08
bzw1b	2524.48	-2.73959	0.449892	-6.08944	1.13306e-09	3.77725e-08
si:dkeyp-28d2.4	1366.52	8.87827	1.46033	6.07965	1.20445e-09	4.00487e-08
ece1	163.696	-10.9619	1.80328	-6.07884	1.21056e-09	4.01483e-08
zgc:154125	2863.88	-6.24939	1.02976	-6.06879	1.28876e-09	4.26319e-08
src	288.227	5.54216	0.914889	6.05775	1.38042e-09	4.55466e-08
si:ch211-158d24.4	325.395	-10.1417	1.67544	-6.05318	1.42016e-09	4.67383e-08
si:dkey-260j18.2	407.837	4.32614	0.715266	6.04829	1.46388e-09	4.8054e-08
igf1	228.071	-11.4485	1.8932	-6.04719	1.47395e-09	4.82614e-08
nr1h3	1299.55	3.87857	0.641533	6.04579	1.48679e-09	4.85585e-08
cxcr3.2	1764.63	-6.26109	1.03721	-6.03647	1.57525e-09	5.13172e-08
s1pr1	498.615	10.4817	1.73727	6.03343	1.60519e-09	5.21607e-08
nrp1b	902.412	-7.25202	1.20222	-6.03219	1.61756e-09	5.24302e-08
si:zfos-741a10.3	891.892	-6.55543	1.08704	-6.03055	1.63398e-09	5.28292e-08
tie1	249.521	-10.0318	1.66499	-6.02514	1.68964e-09	5.44076e-08
c1qtnf5	235.817	10.8655	1.8034	6.02498	1.69125e-09	5.44076e-08
si:dkey-23k10.5	324.655	-3.59891	0.597853	-6.01971	1.74726e-09	5.60693e-08
tent5ba	131.817	-10.6708	1.77306	-6.01827	1.76287e-09	5.64295e-08
si:dkey-253i9.4	5105.51	2.38234	0.39608	6.0148	1.80108e-09	5.75095e-08
sh3kbp1	4118.88	2.61033	0.434273	6.01081	1.84602e-09	5.87984e-08
pde4cb	359.505	9.80735	1.63297	6.00584	1.90349e-09	6.04792e-08
dennd6b	195.125	10.4097	1.73404	6.00314	1.93541e-09	6.13421e-08
bnip4	523.94	-4.43721	0.739358	-6.00143	1.95583e-09	6.1837e-08
lipg	470.872	-10.8102	1.8014	-6.00102	1.96079e-09	6.18418e-08
afap1l2	1527.41	3.37709	0.563462	5.99345	2.0543e-09	6.46326e-08
sb:cb649	405.78	11.6434	1.94452	5.98778	2.12722e-09	6.67636e-08
plagl2	208.56	-7.32575	1.22892	-5.9611	2.50539e-09	7.84414e-08
si:ch211-252f13.5	237.262	-9.74282	1.63556	-5.95685	2.57143e-09	8.03136e-08
ccr2__1	342.555	-6.39571	1.07455	-5.95197	2.64931e-09	8.25456e-08
scarf1	444.375	-9.05253	1.52939	-5.91905	3.23799e-09	1.00644e-07
foxo3a	218.405	10.5137	1.77654	5.91808	3.2572e-09	1.00997e-07
bend3	123.401	-6.80622	1.15059	-5.9154	3.31064e-09	1.02253e-07
hbegfb	1072.91	-3.87515	0.655111	-5.91526	3.31361e-09	1.02253e-07
klf12b	509.781	-6.83722	1.15918	-5.8983	3.67259e-09	1.1306e-07
ebf3b	382.525	-6.45588	1.09484	-5.89664	3.70987e-09	1.13935e-07
lrmda	120.714	-6.98892	1.19232	-5.86161	4.58391e-09	1.40442e-07
msi1	567.448	12.1298	2.07231	5.8533	4.81926e-09	1.47302e-07
def6c	170.796	10.3678	1.77436	5.84312	5.12329e-09	1.56224e-07
skib	140.414	-10.7079	1.83403	-5.83844	5.26908e-09	1.6029e-07
SAMD8	546.016	-5.23274	0.896628	-5.83602	5.34618e-09	1.62252e-07
cdkn1cb	128.944	-8.45484	1.4496	-5.83253	5.45926e-09	1.65294e-07
tlr22	1682.83	-4.88885	0.839245	-5.82529	5.70129e-09	1.72217e-07
fabp11a	591.13	-4.28265	0.735442	-5.82324	5.77184e-09	1.73871e-07
slc18a2	216.464	10.7431	1.84497	5.82291	5.78307e-09	1.73871e-07
ppl	355.09	9.01239	1.54985	5.815	6.06349e-09	1.81876e-07
atp7a	1742.42	-2.71882	0.468887	-5.79846	6.69285e-09	2.00287e-07
f11r.1	258.671	-6.69092	1.154	-5.79801	6.71064e-09	2.00354e-07
fthl27__1	1044.61	-3.65198	0.631159	-5.78615	7.20165e-09	2.14516e-07
ptpn21	303.393	-8.3261	1.43929	-5.78486	7.25714e-09	2.1567e-07
adgre9	321.887	9.85592	1.70428	5.78304	7.33634e-09	2.17521e-07
gpcpd1	4071.87	-2.77361	0.480624	-5.77084	7.88761e-09	2.33328e-07
kcnn4	181.254	10.4765	1.81596	5.76912	7.96844e-09	2.34898e-07
CU104709.1	1367.75	3.02911	0.525102	5.7686	7.99323e-09	2.34898e-07
scpep1	3685.97	-3.5441	0.614383	-5.76855	7.99545e-09	2.34898e-07
tiam1a	5740.11	4.47487	0.77786	5.7528	8.77798e-09	2.57301e-07
tspo	146.408	-10.3841	1.80634	-5.74869	8.99379e-09	2.63028e-07
serpina10a	244.476	9.77066	1.70177	5.74146	9.38612e-09	2.73879e-07
fzd2	4973.37	-3.03248	0.528504	-5.73785	9.58834e-09	2.79147e-07
CABZ01111959.1	3731.75	3.46757	0.604384	5.73736	9.61622e-09	2.79326e-07
acap3a	195.787	10.5506	1.83934	5.73611	9.68785e-09	2.80773e-07
il34	132.141	9.99621	1.74343	5.73366	9.82842e-09	2.84207e-07
piezo1	162.856	-10.301	1.79714	-5.73188	9.93247e-09	2.86572e-07
si:ch211-85n16.4	1003.13	-5.96625	1.04204	-5.72555	1.03099e-08	2.96795e-07
si:dkey-1h24.6	160.612	-10.8369	1.89355	-5.72307	1.04616e-08	3.00492e-07
dennd1b	3516.97	2.87062	0.502888	5.70827	1.14129e-08	3.27016e-07
CABZ01076275.1	1432.82	-4.45487	0.78047	-5.70793	1.14359e-08	3.27016e-07
znrf3	272.815	3.86283	0.676939	5.70632	1.15448e-08	3.29397e-07
fosl1a	669.927	-3.86843	0.678553	-5.701	1.19106e-08	3.39082e-07
arl13b	178.177	9.69045	1.7001	5.69994	1.19853e-08	3.40456e-07
exoc6b	380.506	-9.73557	1.71046	-5.69178	1.25721e-08	3.56339e-07
mibp2	1138.45	-3.04031	0.53426	-5.6907	1.26519e-08	3.57813e-07
reck	653.347	-3.61198	0.635285	-5.68561	1.30347e-08	3.67829e-07
deptor	685.289	-2.67159	0.470034	-5.68383	1.31714e-08	3.70873e-07
yrk	4302.47	2.14118	0.376878	5.68134	1.33641e-08	3.75479e-07
tpm3	3047.47	2.10343	0.370355	5.67949	1.35093e-08	3.78145e-07
tspan14	738.289	2.80202	0.493366	5.67939	1.35178e-08	3.78145e-07
trmt44	155.895	9.75426	1.72294	5.66141	1.50136e-08	4.19077e-07
ptges	228.418	-10.9253	1.93082	-5.65837	1.52813e-08	4.25628e-07
gng10	661.283	-5.58775	0.988117	-5.65495	1.55893e-08	4.33268e-07
spock1	92.7598	-10.5819	1.87412	-5.64633	1.6391e-08	4.54567e-07
map4k5	2066.51	2.20395	0.39054	5.64334	1.66785e-08	4.61085e-07
osbpl5	507.94	-4.22495	0.748689	-5.64314	1.66977e-08	4.61085e-07
si:ch211-220f16.2	1349.7	2.53217	0.449206	5.637	1.73037e-08	4.76797e-07
si:ch211-74f19.2	352.727	-3.63678	0.645285	-5.63593	1.7412e-08	4.78756e-07
pip4k2ab	162.023	10.3176	1.83144	5.63362	1.76469e-08	4.84181e-07
s1pr2	1153.76	3.59339	0.638372	5.629	1.81262e-08	4.96271e-07
pygmb	167.112	10.2982	1.83159	5.62254	1.88175e-08	5.14105e-07
aif1l	3422.94	5.31709	0.946344	5.61856	1.92554e-08	5.24956e-07
rap1gap2a	1737.77	7.36071	1.31441	5.60001	2.14338e-08	5.83108e-07
OTUD7A	433.977	10.2186	1.82516	5.59876	2.15886e-08	5.86082e-07
zcchc14	234.101	-8.2065	1.46638	-5.59643	2.18807e-08	5.92759e-07
si:ch211-147m6.1	186.531	-5.88763	1.05237	-5.59465	2.21062e-08	5.97611e-07
zbtb47b	242.984	6.87333	1.22964	5.5897	2.27465e-08	6.13591e-07
mon1ba	1054.2	7.33006	1.31143	5.58935	2.27927e-08	6.13591e-07
tex261	151.235	9.56095	1.71191	5.58495	2.33771e-08	6.2801e-07
gtpbp1l	141.678	9.75334	1.74788	5.58008	2.40402e-08	6.44477e-07
CABZ01077220.1	99.5703	-10.2652	1.83977	-5.57964	2.41022e-08	6.44796e-07
nipal3	288.052	4.03187	0.723868	5.5699	2.54889e-08	6.80479e-07
tdrd12	185.004	10.5166	1.88863	5.5684	2.57089e-08	6.84931e-07
tmem176l.4	149.727	-8.0246	1.44253	-5.56285	2.65411e-08	7.05642e-07
si:dkey-21a6.5	200.18	-6.05503	1.08949	-5.55769	2.73373e-08	7.25311e-07
si:ch73-24k9.2	1062.4	-6.55635	1.18038	-5.55444	2.78498e-08	7.3739e-07
si:ch211-209l18.4	254.769	8.93385	1.60981	5.54962	2.86291e-08	7.56468e-07
si:ch211-278p9.3	112.727	-10.1412	1.82847	-5.54629	2.91797e-08	7.69436e-07
slc8a2a	120.075	9.8016	1.76765	5.54498	2.93986e-08	7.73621e-07
bin2b	1582.49	-2.26345	0.408532	-5.54044	3.01713e-08	7.92334e-07
ndrg1a	345.756	-3.50645	0.633112	-5.53843	3.05193e-08	7.99841e-07
dok2	1113.04	2.2814	0.412292	5.53346	3.1398e-08	8.21197e-07
hecw2b	133.557	-10.0792	1.82352	-5.52731	3.25173e-08	8.48747e-07
pcgf5a	165.323	-7.42708	1.34439	-5.52449	3.30436e-08	8.60739e-07
trim33l	1418.03	3.15279	0.570935	5.52215	3.34876e-08	8.70542e-07
ftr70	165.104	-11.0315	2.00002	-5.51568	3.47441e-08	9.01385e-07
rac2	2967.68	2.34341	0.425027	5.51356	3.51646e-08	9.1046e-07
il12ba	1012.05	11.5477	2.09621	5.50882	3.61238e-08	9.33416e-07
mfsd2ab	410.859	-3.97831	0.722338	-5.50755	3.63857e-08	9.38299e-07
egr2b	178.241	-6.91362	1.2555	-5.50667	3.65689e-08	9.41137e-07
her6	195.984	-11.428	2.07561	-5.50588	3.67324e-08	9.43457e-07
git1	365.817	4.64199	0.843843	5.50101	3.77625e-08	9.67983e-07
micall1b.2	908.871	2.3794	0.432917	5.4962	3.88055e-08	9.92743e-07
gpat3	412.082	-3.42562	0.624423	-5.48606	4.10994e-08	1.04934e-06
xcr1a.1	634.416	4.60361	0.840192	5.47924	4.27165e-08	1.08847e-06
cyth3a	691.153	-6.57331	1.19987	-5.47834	4.29343e-08	1.09186e-06
si:dkeyp-80d11.1	118.355	9.82325	1.79511	5.47223	4.44408e-08	1.12794e-06
spock3	1039.01	7.14508	1.30646	5.46902	4.52519e-08	1.14626e-06
ints13	167.092	5.1247	0.93787	5.46419	4.65034e-08	1.17565e-06
mcc	180.501	9.47808	1.73483	5.46341	4.67067e-08	1.17847e-06
im:7160594	116.177	-4.88222	0.895752	-5.45042	5.02516e-08	1.26544e-06
acvr2ba	150.503	-10.7649	1.97635	-5.44686	5.12673e-08	1.28849e-06
tmem136b	103.94	-9.85162	1.80985	-5.44333	5.22938e-08	1.31173e-06
drd1b	1166.9	4.61098	0.848092	5.43689	5.42194e-08	1.35738e-06
tram2	97.4449	-10.308	1.89843	-5.42974	5.64354e-08	1.41003e-06
eif2b3	131.199	9.54932	1.75881	5.42941	5.65413e-08	1.41003e-06
tab3	475.561	4.41343	0.813551	5.4249	5.79882e-08	1.44331e-06
tmem120b	148.734	10.0149	1.84635	5.42413	5.82374e-08	1.44672e-06
FAM53C	161.735	5.89862	1.08829	5.4201	5.95644e-08	1.47683e-06
abcc12	657.726	-3.85002	0.71073	-5.417	6.06078e-08	1.49981e-06
raph1a	930.174	-6.51791	1.20386	-5.41415	6.15795e-08	1.52093e-06
trak1a	199.341	-9.1894	1.69849	-5.41034	6.29048e-08	1.55069e-06
si:dkey-19a16.11__2	196.155	9.17354	1.69601	5.4089	6.34143e-08	1.56026e-06
sult4a1	1141.01	4.68597	0.866772	5.40624	6.43629e-08	1.58058e-06
usp31	375.433	3.90181	0.722746	5.3986	6.71644e-08	1.64623e-06
cbx6b	160.604	9.34516	1.73424	5.38862	7.10006e-08	1.73695e-06
nexmifb	148.872	10.1386	1.88187	5.38752	7.14367e-08	1.7443e-06
thsd7ba	181.699	10.4344	1.9369	5.38716	7.15781e-08	1.74445e-06
CABZ01114581.1	673.96	2.88376	0.53541	5.38608	7.20121e-08	1.74732e-06
mgat1b	1255.89	-3.37915	0.627403	-5.38594	7.2068e-08	1.74732e-06
slc9a3r1b	95.4258	-10.0335	1.86295	-5.38585	7.21035e-08	1.74732e-06
tox4a	149.411	9.50237	1.76491	5.38405	7.28283e-08	1.76157e-06
pllp	112.204	-10.4543	1.94234	-5.38234	7.35238e-08	1.77506e-06
pawr	111.225	-10.4398	1.9399	-5.38164	7.38084e-08	1.77859e-06
si:ch73-109i22.2	177.19	10.4111	1.93491	5.38068	7.42043e-08	1.78479e-06
ston2	270.176	6.06253	1.12716	5.3786	7.50655e-08	1.80213e-06
akt2l	100.086	-9.91705	1.844	-5.37802	7.53074e-08	1.80457e-06
ifngr1l	1532.56	-4.15004	0.772734	-5.37059	7.84789e-08	1.87707e-06
fosl2	1831.66	-2.78911	0.519754	-5.3662	8.04122e-08	1.91975e-06
mafgb	1789.31	2.10263	0.392055	5.36311	8.17992e-08	1.94924e-06
prr14	1112.19	2.22628	0.41534	5.36014	8.31574e-08	1.97795e-06
nrp1a	972.429	-6.39534	1.19324	-5.35963	8.33914e-08	1.97985e-06
chrna5	283.197	11.1266	2.07694	5.35723	8.45075e-08	2.00266e-06
tpm1	1366.46	6.7042	1.25159	5.35654	8.48319e-08	2.00665e-06
zfp36l1b	3486.91	-2.13229	0.398265	-5.35396	8.60515e-08	2.03176e-06
arhgap10	253.035	-8.8755	1.65797	-5.35322	8.6403e-08	2.03633e-06
bicral	362.653	3.19194	0.59662	5.35004	8.79325e-08	2.06858e-06
si:dkey-97o5.1	184.623	4.72581	0.883512	5.34889	8.84943e-08	2.078e-06
bik	164.673	10.3423	1.93615	5.34167	9.2093e-08	2.15856e-06
CABZ01026681.1	140.205	7.3784	1.38219	5.33819	9.38804e-08	2.19646e-06
obscnb	104.113	9.64763	1.80743	5.33777	9.40953e-08	2.19749e-06
tgfb1b	1551.11	3.18284	0.596625	5.33474	9.56819e-08	2.2305e-06
rnf19a	1518.06	-2.09903	0.393556	-5.33351	9.63315e-08	2.24158e-06
laynb	102.071	-10.1536	1.90674	-5.32513	1.00882e-07	2.34322e-06
usp54b	156.89	10.2308	1.92246	5.32173	1.02782e-07	2.38307e-06
snrkb	989.87	-7.70905	1.44952	-5.31834	1.04717e-07	2.4232e-06
msl1b	150.284	9.13182	1.71714	5.31804	1.0489e-07	2.4232e-06
washc4	1297.25	-2.23884	0.421551	-5.31095	1.09054e-07	2.51489e-06
pdgfrb	758.714	-4.75534	0.896659	-5.30339	1.13669e-07	2.61662e-06
vps54	2015.66	3.91568	0.738704	5.30073	1.15338e-07	2.6503e-06
bbox1	278.678	-3.45593	0.652265	-5.29835	1.16853e-07	2.68032e-06
LO018176.1	2814.71	2.11486	0.39938	5.29537	1.18778e-07	2.71964e-06
si:ch211-195b13.1	552.985	-3.30114	0.623698	-5.29285	1.20425e-07	2.75244e-06
chmp1a	141.616	9.20934	1.7412	5.28908	1.2293e-07	2.80473e-06
GRB14	177.63	9.02059	1.7089	5.2786	1.30176e-07	2.9648e-06
camkvl	222.977	-9.67573	1.83365	-5.27677	1.31481e-07	2.98921e-06
zgc:101663	219.185	-6.55742	1.24305	-5.27525	1.32579e-07	3.00885e-06
AL831726.2	659.904	-3.47449	0.658806	-5.27392	1.33541e-07	3.02536e-06
bcl6aa	209.53	4.67396	0.887158	5.26846	1.37574e-07	3.11125e-06
pigrl4.2	2037.71	7.74078	1.46993	5.26608	1.39364e-07	3.1462e-06
cox6a2	109.88	9.35086	1.77641	5.26391	1.41026e-07	3.17815e-06
APBA3	158.029	9.39997	1.78784	5.25772	1.45855e-07	3.28122e-06
si:ch211-8c17.2	338.727	5.99477	1.14109	5.25357	1.49177e-07	3.35011e-06
qsox1	188.443	9.73177	1.85337	5.25086	1.51392e-07	3.39391e-06
hdgfl2	164.299	6.79446	1.29512	5.24619	1.5528e-07	3.47502e-06
pdxka	157.6	10.0638	1.91857	5.24546	1.55897e-07	3.48278e-06
atrn	1649.64	2.21614	0.423028	5.23877	1.61653e-07	3.60511e-06
rgs19	1136.1	-2.22706	0.425492	-5.23409	1.65799e-07	3.69118e-06
vav3a	170.098	7.17174	1.37067	5.23228	1.67431e-07	3.71672e-06
pid1	183.957	-7.06989	1.35123	-5.23218	1.67524e-07	3.71672e-06
spred2b	554.779	-3.40467	0.650937	-5.2304	1.6914e-07	3.74612e-06
sesn2	190.731	5.79838	1.10884	5.22921	1.70239e-07	3.76398e-06
si:rp71-1g18.1	99.2069	-10.0639	1.92696	-5.22272	1.76317e-07	3.88982e-06
sema3bl	308.939	11.189	2.14247	5.22249	1.76535e-07	3.88982e-06
tmem63bb	184.71	8.82846	1.69115	5.2204	1.78536e-07	3.92717e-06
aatka	2662.51	-6.37913	1.2224	-5.21851	1.80367e-07	3.96069e-06
csf2rb	3947.01	-4.54418	0.871098	-5.21662	1.82219e-07	3.99455e-06
cntn3a.2	490.926	5.459	1.04686	5.21462	1.84196e-07	4.031e-06
adgrg1__1	233.549	6.50491	1.24839	5.21063	1.88203e-07	4.11171e-06
ptprsa__1	528.393	7.61299	1.46169	5.20834	1.90534e-07	4.15559e-06
zgc:112492	112.934	-9.41498	1.81058	-5.19996	1.99326e-07	4.33998e-06
rbm45	138.744	9.08626	1.74766	5.19911	2.00245e-07	4.35261e-06
CR381673.2	368.333	-22.1428	4.26775	-5.18839	2.12117e-07	4.60291e-06
si:ch211-26b3.4	1203.56	-6.78763	1.30958	-5.18308	2.18254e-07	4.72811e-06
b4galnt4a	558.02	6.58748	1.27161	5.18042	2.21386e-07	4.78158e-06
spry1	114.581	9.19266	1.77452	5.18035	2.21466e-07	4.78158e-06
zgc:158659	354.138	-4.32585	0.835829	-5.17552	2.27272e-07	4.89873e-06
c1qb	972.072	-6.70365	1.29644	-5.17082	2.33066e-07	5.00951e-06
nbn	218.762	4.22158	0.816439	5.17072	2.33191e-07	5.00951e-06
prkcea	134.512	-5.9847	1.15782	-5.16893	2.35444e-07	5.04948e-06
naga	1275.81	-2.5741	0.498111	-5.16772	2.36966e-07	5.07368e-06
foxj3	947.136	2.38307	0.462021	5.15793	2.49698e-07	5.3374e-06
ctso	158.083	8.41079	1.63343	5.14916	2.61654e-07	5.57754e-06
b3gnt5a	114.791	-9.35941	1.81769	-5.14906	2.61799e-07	5.57754e-06
mtmr12	1910.39	2.14104	0.416175	5.14458	2.68125e-07	5.70286e-06
git2b	5663.21	-2.08448	0.405225	-5.14401	2.68939e-07	5.71074e-06
map2	188.794	10.5233	2.04598	5.14341	2.69793e-07	5.71943e-06
stap2b	86.3278	-9.54868	1.85825	-5.13853	2.76895e-07	5.86035e-06
rpl26__1	964.504	-2.42984	0.473359	-5.13319	2.84866e-07	6.01914e-06
ppwd1	120.557	9.04951	1.76385	5.13053	2.88927e-07	6.09494e-06
capn8	295.586	-22.3763	4.36264	-5.12908	2.91167e-07	6.13213e-06
igf1ra	96.0716	-10.1978	1.98861	-5.1281	2.92682e-07	6.15398e-06
si:dkey-22i16.9	441.263	7.12704	1.39153	5.12172	3.02766e-07	6.35561e-06
rimkla	711.032	-2.8033	0.547599	-5.11927	3.06726e-07	6.42827e-06
zbtb38	106.727	9.70495	1.89687	5.11631	3.11577e-07	6.51931e-06
slc25a35	107.022	9.55507	1.86902	5.11234	3.18196e-07	6.647e-06
inpp5b	1425.31	-2.50195	0.489612	-5.11007	3.22036e-07	6.7163e-06
lamp1a	357.632	-3.64164	0.712745	-5.10932	3.23316e-07	6.73208e-06
sinup	81.2156	-10.0688	1.97181	-5.10637	3.28409e-07	6.82708e-06
ncam1b	121.413	9.88779	1.93679	5.10524	3.3038e-07	6.85698e-06
lrch2	3239.01	2.35384	0.46125	5.10317	3.34012e-07	6.9212e-06
phf12b	362.17	3.00983	0.590072	5.10079	3.38235e-07	6.99744e-06
zgc:113208	110.515	-5.68048	1.11378	-5.1002	3.39293e-07	7.00806e-06
si:ch211-266g18.9	784.338	-3.54159	0.694699	-5.09802	3.4323e-07	7.07801e-06
dock3	85.2096	-10.357	2.03342	-5.09337	3.51756e-07	7.24224e-06
cabz01093075.1	769.359	-5.45167	1.07063	-5.09201	3.54294e-07	7.28284e-06
foxc1b	149.602	-10.2288	2.0106	-5.08742	3.62967e-07	7.44923e-06
tspan36	3147.65	-2.53699	0.498828	-5.08589	3.65898e-07	7.49742e-06
fgd6	166.371	-8.83704	1.73906	-5.08151	3.74455e-07	7.66056e-06
rab1aa	138.429	9.07515	1.78737	5.07739	3.82658e-07	7.81595e-06
CABZ01046088.1	85.1575	-10.2847	2.02595	-5.07649	3.84474e-07	7.84059e-06
dusp2	763.106	-3.73549	0.736093	-5.07475	3.88e-07	7.89998e-06
npl	956.752	-2.76765	0.545574	-5.07291	3.91776e-07	7.96426e-06
il22	312.452	11.2644	2.22099	5.0718	3.94079e-07	7.99843e-06
pkmyt1	144.479	5.97721	1.1799	5.06585	4.06572e-07	8.2281e-06
cx32.2	2564.48	-2.76492	0.545801	-5.06581	4.06673e-07	8.2281e-06
rnf103	127.196	8.92835	1.7635	5.06287	4.12985e-07	8.34269e-06
lifrb	689.461	-9.73214	1.92358	-5.05939	4.20608e-07	8.48335e-06
aak1a	121.416	9.39016	1.85638	5.05831	4.22978e-07	8.51782e-06
si:ch73-226l13.2	97.2054	9.55471	1.88933	5.0572	4.25468e-07	8.55456e-06
nr2f2	114.014	-8.72285	1.72568	-5.05472	4.31018e-07	8.64179e-06
nudt21	122.66	9.27646	1.83523	5.05466	4.31149e-07	8.64179e-06
inhbb	767.959	-8.43743	1.66946	-5.05398	4.32693e-07	8.65924e-06
specc1	6296.27	3.10216	0.613911	5.0531	4.34687e-07	8.68563e-06
rbbp8	97.21	9.17166	1.81524	5.0526	4.35837e-07	8.69512e-06
naa35	126.878	8.82286	1.74705	5.05014	4.41483e-07	8.79412e-06
crhr1	248.958	10.9329	2.16607	5.04735	4.47976e-07	8.90968e-06
cnot6a	3903.16	2.49193	0.493963	5.04478	4.54051e-07	9.01655e-06
crtc1b	91.4607	9.30736	1.8458	5.04244	4.59624e-07	9.11316e-06
faxdc2	92.5519	-6.98831	1.3869	-5.03881	4.68443e-07	9.27373e-06
cltcl1	96.152	9.55925	1.89775	5.03716	4.72497e-07	9.33962e-06
nsmfb	188.213	10.5272	2.09464	5.02577	5.01404e-07	9.89581e-06
hmcn1	105.274	9.49542	1.88973	5.02475	5.04082e-07	9.93342e-06
trappc5	162.382	8.34698	1.66312	5.01887	5.19767e-07	1.02269e-05
klf11a	131.737	5.49732	1.09541	5.01852	5.20707e-07	1.02297e-05
tfcp2l1	104.97	9.66451	1.92803	5.01263	5.3691e-07	1.0532e-05
ugt5a1	191.904	-9.14662	1.8286	-5.00197	5.67472e-07	1.11145e-05
si:ch211-236p22.1	93.3765	9.50937	1.90175	5.00032	5.72342e-07	1.11929e-05
bcorl1	113.567	9.53333	1.90759	4.99758	5.80536e-07	1.13359e-05
fmnl1a	7201.02	1.93871	0.388858	4.98566	6.17498e-07	1.20393e-05
pggt1b	160.931	4.50589	0.905163	4.97799	6.42466e-07	1.25072e-05
si:ch211-8c17.3	170.651	6.18658	1.24385	4.97372	6.56814e-07	1.27574e-05
CT030188.1	392.119	-3.71221	0.746388	-4.97357	6.57302e-07	1.27574e-05
zgc:77650	935.308	2.5597	0.515096	4.96938	6.71684e-07	1.30169e-05
gramd1bb	551.743	-6.4939	1.30754	-4.9665	6.8171e-07	1.31914e-05
mapta	1528.49	2.45961	0.495387	4.96503	6.86893e-07	1.32717e-05
egr1	18515.3	-2.85101	0.574518	-4.96243	6.96162e-07	1.34245e-05
trim46b	129.432	10.0012	2.01547	4.96223	6.96891e-07	1.34245e-05
si:dkey-9i23.15	89.5648	-9.62016	1.93959	-4.95989	7.05333e-07	1.35668e-05
cpeb3	97.2276	8.968	1.81012	4.95436	7.25675e-07	1.39373e-05
znf516	187.422	-6.80758	1.37562	-4.94872	7.47033e-07	1.4323e-05
dock1	130.829	9.83907	1.9883	4.94847	7.47985e-07	1.4323e-05
crema	1315.48	-4.18141	0.845414	-4.94599	7.57559e-07	1.44848e-05
hk2	834.396	-3.12544	0.631991	-4.94538	7.59957e-07	1.45091e-05
plp2	579.157	-3.95369	0.801294	-4.93413	8.05077e-07	1.53478e-05
slc4a4b	869.857	-4.86595	0.986294	-4.93357	8.07418e-07	1.53696e-05
arrdc2	2368.14	-4.11949	0.835827	-4.92864	8.28023e-07	1.57385e-05
abi2b	2295.01	-2.6602	0.539845	-4.9277	8.32021e-07	1.57833e-05
cadm4	3185.18	2.43041	0.493232	4.92751	8.3283e-07	1.57833e-05
abhd13	124.003	8.86158	1.79861	4.92689	8.35468e-07	1.581e-05
si:dkey-9k7.3	171.944	-5.23803	1.06325	-4.92642	8.37511e-07	1.58254e-05
bri3bp	128.327	5.71776	1.16113	4.92433	8.46513e-07	1.5972e-05
pknox2	107.395	9.72912	1.97623	4.92306	8.52011e-07	1.60522e-05
epb41l3b	1250.66	-3.67528	0.746782	-4.92148	8.58918e-07	1.61587e-05
cdc23	98.6702	8.93906	1.81804	4.91685	8.79463e-07	1.65211e-05
si:ch73-236e11.2	117.675	9.1252	1.85689	4.91422	8.91344e-07	1.67199e-05
bach2a	139.992	10.0875	2.05303	4.91348	8.94747e-07	1.67382e-05
zbtb14	126.711	9.01795	1.83536	4.91344	8.94925e-07	1.67382e-05
pdlim2	93.5583	9.09816	1.85184	4.91305	8.96713e-07	1.67473e-05
CDK18	76.229	-10.2389	2.08434	-4.91227	9.00271e-07	1.67894e-05
aifm2	139.374	-4.7124	0.960633	-4.90552	9.31803e-07	1.73523e-05
det1	99.9078	8.92198	1.81942	4.90374	9.40282e-07	1.74849e-05
cfp	935.576	-2.65092	0.540733	-4.90246	9.46442e-07	1.7574e-05
cmklr1	9225.24	-2.62774	0.53621	-4.90058	9.55534e-07	1.76792e-05
tyrobp	200.057	6.44866	1.31591	4.90053	9.55769e-07	1.76792e-05
CABZ01099847.1	82.8055	9.31561	1.90097	4.90044	9.56226e-07	1.76792e-05
pik3cd	2139.34	2.45652	0.501444	4.89889	9.638e-07	1.77936e-05
top3b	97.409	8.92201	1.82342	4.89302	9.92991e-07	1.83063e-05
si:ch211-261d7.6	106.04	-9.99287	2.04337	-4.89039	1.00636e-06	1.85263e-05
acp6	179.776	4.46503	0.913647	4.88704	1.02363e-06	1.88146e-05
si:ch211-9d9.8__1	785.691	5.98044	1.2238	4.88679	1.02495e-06	1.88146e-05
si:ch73-248e21.5	2162.76	-2.90487	0.594897	-4.88298	1.04493e-06	1.9154e-05
rexo4	141.505	9.17559	1.87999	4.88067	1.05727e-06	1.93527e-05
si:dkey-193b15.5	82.5843	9.26143	1.90027	4.87375	1.09502e-06	2.00152e-05
MAP3K13	83.9961	9.21622	1.89113	4.8734	1.09696e-06	2.00223e-05
enpp1	3774.68	-3.09484	0.63515	-4.87261	1.10133e-06	2.00735e-05
msmo1	136.96	-10.4186	2.13892	-4.87098	1.11044e-06	2.02109e-05
si:ch211-264f5.2	546.227	-8.05214	1.6561	-4.86212	1.16138e-06	2.11083e-05
elac2	177.183	7.98272	1.64239	4.86041	1.1714e-06	2.12604e-05
tcea3	874.481	-2.67541	0.550655	-4.85859	1.18222e-06	2.14165e-05
dnajb6b	146.036	8.51594	1.75283	4.85841	1.18334e-06	2.14165e-05
si:dkey-239i20.2	59.0087	-9.76992	2.01192	-4.85602	1.19768e-06	2.16457e-05
slc7a10a	86.1735	9.33294	1.92257	4.85441	1.20746e-06	2.17918e-05
synj2bp	103.807	8.78052	1.81394	4.84057	1.29466e-06	2.33143e-05
rida	100.182	9.45781	1.95391	4.84045	1.29544e-06	2.33143e-05
adam9	1131.45	-3.71667	0.767961	-4.83966	1.3006e-06	2.33745e-05
si:cabz01080528.1	94.8984	8.86307	1.8356	4.82844	1.37605e-06	2.46959e-05
dhtkd1	97.292	9.1375	1.89286	4.82736	1.38356e-06	2.47961e-05
glb1l	3549.51	2.00761	0.415981	4.82621	1.39159e-06	2.49054e-05
rasa1a	616.214	3.19447	0.661976	4.82565	1.39546e-06	2.494e-05
si:ch73-281k2.5	694.433	2.54376	0.52726	4.82449	1.40361e-06	2.50508e-05
prr5a	339.127	-5.28942	1.09719	-4.82089	1.4292e-06	2.54722e-05
rbms3	342.292	-7.04073	1.4606	-4.82044	1.4324e-06	2.5494e-05
pik3ca	476.954	3.28888	0.682367	4.81981	1.43698e-06	2.55402e-05
calua	111.939	9.39632	1.95071	4.81687	1.45831e-06	2.58835e-05
myo5ab	92.1644	9.29489	1.92988	4.8163	1.46242e-06	2.59207e-05
wipf1b	2259.76	-4.52568	0.939893	-4.8151	1.47125e-06	2.60414e-05
sec61a1	2485.06	-1.85478	0.385235	-4.81467	1.47446e-06	2.60624e-05
ms4a17a.9	505.733	-5.08301	1.05583	-4.81421	1.47781e-06	2.60856e-05
fam234a	125.908	-4.60159	0.955909	-4.81384	1.48058e-06	2.60988e-05
timp2b	68.4044	-9.53956	1.9824	-4.81214	1.49324e-06	2.62859e-05
ern2	133.744	8.93097	1.85708	4.80915	1.5157e-06	2.66449e-05
trpv4	106.665	-9.80801	2.03974	-4.80846	1.52099e-06	2.67013e-05
LRRC75A	288.509	-4.74282	0.98646	-4.80792	1.52511e-06	2.67373e-05
prrg4	83.4609	9.02551	1.87811	4.80565	1.54252e-06	2.70057e-05
napga	179.081	6.15122	1.28008	4.80535	1.54478e-06	2.70084e-05
mybpha	127.857	9.98348	2.08083	4.79783	1.60393e-06	2.80046e-05
fbxo38	381.472	5.83332	1.21631	4.79591	1.61941e-06	2.82365e-05
gab2	75.7715	9.19652	1.91932	4.79156	1.65491e-06	2.87964e-05
tubb4b	3602.01	-1.98976	0.415275	-4.79143	1.65599e-06	2.87964e-05
acss2l	125.43	9.94529	2.07672	4.78895	1.67658e-06	2.9115e-05
pomgnt1	93.5401	8.76516	1.83041	4.78862	1.67929e-06	2.91228e-05
irak3	2748.28	2.21639	0.462901	4.78804	1.68415e-06	2.91677e-05
ptprsa__2	100.119	9.01335	1.88281	4.78717	1.69151e-06	2.92558e-05
rab5aa	4554.21	1.78614	0.373233	4.78558	1.70497e-06	2.94491e-05
egr3	1404.31	-4.36034	0.911385	-4.7843	1.71582e-06	2.95968e-05
pth1ra	94.5649	-10.2853	2.15086	-4.78194	1.73609e-06	2.99063e-05
myh9a	1536.84	-4.38651	0.917557	-4.78064	1.74738e-06	3.00606e-05
prkcaa	1443.19	4.55284	0.953304	4.77585	1.78948e-06	3.07436e-05
shmt1	110.443	-8.59544	1.80188	-4.77025	1.83998e-06	3.15692e-05
cers1	151.189	8.60072	1.80446	4.76636	1.87581e-06	3.21411e-05
tmem131l	3892	1.8992	0.398603	4.76465	1.89183e-06	3.23724e-05
si:ch211-165g14.1	116.636	8.55845	1.79961	4.75573	1.9773e-06	3.379e-05
gnaq	143.497	10.1467	2.13438	4.75391	1.99523e-06	3.40513e-05
zgc:101715	218.11	-4.58373	0.964873	-4.7506	2.02815e-06	3.4528e-05
slc25a39	768.919	2.81431	0.59242	4.75054	2.02874e-06	3.4528e-05
daam1a	319.32	-3.2309	0.680147	-4.75029	2.03122e-06	3.4528e-05
natd1	134.19	6.76361	1.42436	4.74853	2.04898e-06	3.4784e-05
klhl7	101.407	8.73604	1.84013	4.74751	2.05937e-06	3.49144e-05
frs2b	302.913	3.07267	0.647364	4.74643	2.07037e-06	3.50547e-05
sv2	97.929	8.59613	1.81248	4.74275	2.10841e-06	3.56518e-05
mogat3b	79.0439	-8.99626	1.89958	-4.73591	2.18077e-06	3.6827e-05
smad6a	111.04	-8.47631	1.79019	-4.73486	2.19208e-06	3.69694e-05
CU571315.1	111.208	-10.1868	2.15208	-4.73348	2.20699e-06	3.71721e-05
smchd1	1038.86	2.55335	0.539463	4.73314	2.21077e-06	3.71871e-05
mitfb	766.808	-2.63745	0.558022	-4.72642	2.28509e-06	3.8387e-05
dhrs7	93.4573	8.7702	1.85573	4.726	2.28988e-06	3.84175e-05
AL831726.1	166.465	8.02191	1.69832	4.72344	2.31891e-06	3.88539e-05
nrip1b	152.057	7.85297	1.66386	4.71974	2.3615e-06	3.95159e-05
tpd52	128.762	8.21049	1.7404	4.7176	2.38645e-06	3.98817e-05
ankle2	92.1986	8.69521	1.84337	4.71702	2.39325e-06	3.99434e-05
pla2g4ab	127.383	5.51561	1.17022	4.71333	2.43707e-06	4.0622e-05
cnnm2a	114.489	9.53331	2.02341	4.71151	2.4589e-06	4.09328e-05
si:ch211-214p13.9	71.5444	-9.56795	2.03425	-4.70342	2.5584e-06	4.25343e-05
hadhaa	123.175	-8.27273	1.76187	-4.69544	2.66038e-06	4.41726e-05
bnip1b	86.5149	8.78894	1.87198	4.69501	2.66594e-06	4.42079e-05
cdc42se1	751.662	-3.47822	0.741011	-4.69388	2.68076e-06	4.43965e-05
ccl34a.4	313.944	-7.43379	1.5876	-4.68241	2.83519e-06	4.68936e-05
sla2	476.659	6.09674	1.30267	4.6802	2.86592e-06	4.7341e-05
ndufa8	92.3072	8.60229	1.83897	4.67777	2.9001e-06	4.78126e-05
parp6b	110.7	-10.4868	2.24189	-4.67764	2.9019e-06	4.78126e-05
nrros	2533.74	-1.82652	0.391079	-4.67046	3.00533e-06	4.94535e-05
trib2	73.0221	9.12381	1.95419	4.66884	3.02899e-06	4.97791e-05
si:dkey-102f14.5	226.537	3.44094	0.737332	4.66674	3.06018e-06	5.02275e-05
tm7sf3	292.374	6.02002	1.29043	4.66514	3.08405e-06	5.05548e-05
nucb2b	168.039	6.93038	1.48589	4.66412	3.09934e-06	5.07408e-05
lin7b	130.556	9.96619	2.13773	4.66205	3.1307e-06	5.11891e-05
pop5	71.9231	9.02401	1.93617	4.66075	3.15063e-06	5.14496e-05
dse	251.231	-5.52111	1.18471	-4.66031	3.15731e-06	5.14933e-05
ugt2a1	464.497	-6.02559	1.29309	-4.65985	3.16434e-06	5.15427e-05
gda	107.787	-10.0062	2.14907	-4.65606	3.22325e-06	5.24358e-05
ranbp3b	306.802	2.85837	0.614401	4.65229	3.28263e-06	5.33344e-05
dcun1d5	126.148	8.88307	1.91024	4.65023	3.31571e-06	5.38039e-05
si:dkey-205h13.1	505.793	-4.369	0.940249	-4.64664	3.37388e-06	5.4679e-05
cttnbp2nlb	177.728	10.4506	2.24974	4.64527	3.39637e-06	5.49742e-05
CABZ01041494.1	1265.79	-3.85799	0.831205	-4.64144	3.45982e-06	5.59308e-05
eif3hb	113.686	6.13843	1.32336	4.63851	3.50931e-06	5.66598e-05
psma8	154.069	7.63788	1.64769	4.63552	3.56037e-06	5.74121e-05
pdlim1	171.898	10.3787	2.2407	4.63187	3.62377e-06	5.83613e-05
manea	94.6463	8.77509	1.89509	4.63044	3.64889e-06	5.86923e-05
si:dkey-40g16.6	337.899	-11.0274	2.38282	-4.62789	3.69414e-06	5.93461e-05
arhgef15	3229.88	1.9187	0.414646	4.62732	3.70436e-06	5.9436e-05
adgrg1__2	526.436	2.82012	0.609653	4.62578	3.73199e-06	5.97802e-05
pi4kab	77.0733	8.96336	1.93777	4.6256	3.7351e-06	5.97802e-05
ccdc126	109.528	8.58576	1.85654	4.6246	3.75325e-06	5.9996e-05
zgc:162939	103.772	7.94877	1.72	4.62137	3.81215e-06	6.08619e-05
arhgap17b	6065.94	1.91697	0.414938	4.6199	3.83932e-06	6.12198e-05
mtus1b	117.999	-10.0152	2.16848	-4.61853	3.8647e-06	6.15482e-05
plxnb1b	5052.79	5.41499	1.17292	4.61667	3.89947e-06	6.20251e-05
slc16a10	595.924	-3.28081	0.710703	-4.61629	3.90663e-06	6.2032e-05
cmpk	96.3985	8.88009	1.92397	4.61551	3.92141e-06	6.2032e-05
gid8a	79.7941	8.99006	1.94781	4.61547	3.92201e-06	6.2032e-05
st8sia4	499.302	-3.86574	0.83758	-4.61537	3.92395e-06	6.2032e-05
hspa13	161.165	6.17197	1.33727	4.61537	3.924e-06	6.2032e-05
gpr52	178.888	5.28788	1.14584	4.61486	3.93355e-06	6.2078e-05
ndel1b	442.845	-2.97715	0.645144	-4.6147	3.93656e-06	6.2078e-05
si:zfos-80g12.1	137.715	8.39171	1.81899	4.61338	3.96177e-06	6.23991e-05
vaspb	117.647	-7.26747	1.57661	-4.60956	4.03522e-06	6.34783e-05
nagk	153.781	7.8209	1.69684	4.60911	4.04403e-06	6.35392e-05
calr	133.39	6.7663	1.46934	4.605	4.12461e-06	6.47262e-05
abhd12	3633.61	-2.41676	0.524997	-4.60338	4.15683e-06	6.51524e-05
gpr155a	945.197	2.09384	0.45562	4.59558	4.31543e-06	6.75559e-05
nelfcd	83.5605	8.69952	1.89325	4.59501	4.32727e-06	6.76589e-05
si:ch211-1e14.1	99.0736	8.89651	1.93638	4.5944	4.33987e-06	6.77736e-05
tlx1	51.9566	-9.44771	2.05735	-4.59218	4.38638e-06	6.8417e-05
chmp6b	119.818	8.73405	1.90257	4.59065	4.41875e-06	6.88383e-05
ubiad1	101.119	8.51226	1.8544	4.59031	4.42594e-06	6.8867e-05
tpte	450.187	-2.8278	0.616213	-4.58899	4.45396e-06	6.92149e-05
map1sa	1110.28	-2.81646	0.613774	-4.58875	4.45906e-06	6.92149e-05
edem2	89.4693	8.50593	1.8552	4.58491	4.5419e-06	7.04159e-05
si:ch211-194m7.3	146.656	-4.91083	1.07119	-4.58447	4.55139e-06	7.04781e-05
cc2d1b	883.781	-2.49769	0.545191	-4.58131	4.62077e-06	7.14664e-05
mocs1	134.675	6.77276	1.47856	4.58065	4.63527e-06	7.16047e-05
fibpb	184.461	4.28715	0.937127	4.57479	4.76709e-06	7.35526e-05
prdx3	81.7662	8.54502	1.86832	4.57364	4.79316e-06	7.38663e-05
si:ch211-107o10.3	93.1831	8.47614	1.85397	4.57188	4.8336e-06	7.44004e-05
atxn7l2a	79.3332	8.82936	1.93167	4.57084	4.85762e-06	7.46506e-05
gldc	178.055	-11.5375	2.52423	-4.57068	4.86145e-06	7.46506e-05
fam208aa	665.473	2.3335	0.51085	4.56789	4.92665e-06	7.55615e-05
si:dkeyp-68b7.7__1	107.017	7.03813	1.54103	4.56715	4.94392e-06	7.57362e-05
tada2b	88.7131	8.66697	1.89788	4.56667	4.95543e-06	7.58222e-05
kcnq5b	3342.7	2.73339	0.59864	4.566	4.97116e-06	7.59726e-05
si:ch73-130a3.4	114.192	-8.36862	1.83407	-4.56287	5.04599e-06	7.70247e-05
atad5a	79.5224	8.94635	1.96155	4.56086	5.09444e-06	7.76721e-05
irf4a	1369.07	5.91204	1.29635	4.56052	5.10266e-06	7.77054e-05
ttc3	4959.97	2.0014	0.438897	4.56008	5.11335e-06	7.77761e-05
srm	100.331	8.7771	1.92582	4.55759	5.17441e-06	7.86119e-05
dsela	298.879	4.00367	0.879688	4.55124	5.33301e-06	8.09259e-05
clcn2a	70.6622	9.08396	1.99661	4.54968	5.37268e-06	8.14319e-05
dnaja3b	83.4502	8.52956	1.87525	4.54848	5.40338e-06	8.18008e-05
gsdmea	1373.13	2.63128	0.578882	4.54544	5.48196e-06	8.2893e-05
TSC22D3	108.021	-9.82163	2.16398	-4.5387	5.66034e-06	8.54035e-05
si:ch211-59o9.10	74.4021	8.69071	1.91482	4.53866	5.66127e-06	8.54035e-05
sox9b	90.9652	7.9968	1.76252	4.53715	5.70198e-06	8.59169e-05
tnfsf10l	179.496	-7.43393	1.63903	-4.53555	5.74523e-06	8.64674e-05
stim1a	2368.94	-1.75597	0.387584	-4.53057	5.88245e-06	8.84292e-05
pip5k1bb	434.121	3.31652	0.732388	4.52837	5.94407e-06	8.92512e-05
hspb1	303.217	-4.46869	0.986909	-4.52796	5.95546e-06	8.9318e-05
p2ry10	85.946	9.37824	2.07164	4.52696	5.98384e-06	8.96391e-05
si:ch211-106h4.4	507.168	-4.04653	0.894499	-4.52379	6.07418e-06	9.08867e-05
CABZ01038524.1	376.93	2.727	0.60299	4.52247	6.11211e-06	9.13479e-05
OSBPL8	3145.92	2.92014	0.645766	4.52197	6.12669e-06	9.14597e-05
pde4ba	3529.43	2.1476	0.475062	4.52068	6.16414e-06	9.19122e-05
paxip1	174.38	4.20323	0.931862	4.51057	6.4653e-06	9.62911e-05
ch25h	4664.15	-1.99557	0.442763	-4.50709	6.57227e-06	9.77711e-05
rnf175	88.0592	8.55113	1.8974	4.50677	6.58215e-06	9.7805e-05
tiam2b	103.819	9.68204	2.14974	4.50381	6.67458e-06	9.9064e-05
yipf5	126.594	4.64671	1.03194	4.50291	6.70302e-06	9.93715e-05
sept9b	2759.42	-2.19956	0.488629	-4.50148	6.74815e-06	9.99254e-05
upf3a	73.116	8.89447	1.9765	4.50011	6.79187e-06	0.000100457
gpatch8	7912.41	1.81362	0.403223	4.49779	6.86621e-06	0.00010144
hlcs	75.3741	8.66218	1.9263	4.49681	6.89814e-06	0.000101795
ppat	83.1206	8.57546	1.90949	4.49097	7.09e-06	0.000104507
si:ch73-347e22.4	232.177	-4.62806	1.03079	-4.48981	7.12874e-06	0.000104957
tmem184a	195.504	5.19582	1.15769	4.48808	7.18682e-06	0.000105691
cd2ap	4705.55	-1.57466	0.350969	-4.48662	7.23635e-06	0.000106298
dap3	77.9186	8.53192	1.90523	4.47816	7.5288e-06	0.000110468
si:ch73-27e22.4	143.594	10.1437	2.2654	4.47767	7.54615e-06	0.000110597
dusp22b	91.3349	9.10476	2.03558	4.47281	7.71992e-06	0.000113015
zhx2a	385.482	2.86439	0.640855	4.46964	7.83499e-06	0.000114569
si:ch73-389k6.1	105.874	6.53558	1.46239	4.46912	7.85434e-06	0.000114722
si:ch211-28p3.3	102.026	9.65791	2.16116	4.46885	7.8642e-06	0.000114735
syt11a	115.879	7.94386	1.7783	4.46711	7.92831e-06	0.00011554
ptprua	60.3146	8.84407	1.98035	4.4659	7.97311e-06	0.000116061
parp12a	3010.04	-3.98205	0.892076	-4.4638	8.05197e-06	0.000117077
grid2	602.753	8.90544	1.99519	4.46346	8.06465e-06	0.000117129
CABZ01102170.1	67.4022	8.86143	1.98601	4.46193	8.12246e-06	0.000117835
arhgef7b	462.232	-2.61682	0.587065	-4.45747	8.29326e-06	0.000120178
timm50	80.5646	8.4415	1.89483	4.45501	8.38876e-06	0.000121425
nudt14	77.7893	8.37254	1.87994	4.45361	8.44377e-06	0.000122084
asf1bb	90.4542	8.29712	1.86326	4.45302	8.467e-06	0.000122282
si:ch211-214c20.1__2	96.1179	7.96024	1.78993	4.44724	8.69814e-06	0.000125479
si:ch73-95l15.5	3224.33	3.90442	0.878257	4.44565	8.76271e-06	0.000126269
dram1	330.771	-3.74375	0.842361	-4.44435	8.81583e-06	0.000126893
hepacam2	2763.22	5.89489	1.32646	4.44406	8.82776e-06	0.000126923
paox1	964.318	-3.06406	0.689887	-4.4414	8.93774e-06	0.00012836
desi2	1503.7	2.13141	0.480382	4.43692	9.12573e-06	0.000130914
arhgef10la	515.258	-5.9953	1.35136	-4.4365	9.14322e-06	0.000131019
trim47	168.217	5.55167	1.25183	4.43484	9.21416e-06	0.000131889
CABZ01061591.1	447.132	-6.0809	1.37127	-4.43451	9.22832e-06	0.000131944
slc7a7	4230.09	-1.75636	0.396255	-4.43241	9.3185e-06	0.000133086
CABZ01073033.1	98.7108	9.61032	2.16888	4.43099	9.37994e-06	0.000133815
riok2	117.988	8.19995	1.85159	4.42859	9.48505e-06	0.000135165
mcf2l2	1133.29	-4.58259	1.03577	-4.42432	9.67443e-06	0.000137711
utrn	4604.75	1.90827	0.431684	4.42052	9.84615e-06	0.00014
slc8a4b	2326.23	3.08542	0.698671	4.41613	1.00483e-05	0.000142717
si:dkey-244a7.1	62.6469	8.81168	1.99577	4.41518	1.00924e-05	0.000143185
tecpr1a	68.0873	8.90935	2.02292	4.40419	1.06177e-05	0.000150473
nck1a	3174.47	3.22684	0.732974	4.4024	1.07061e-05	0.00015148
mad1l1	189.005	4.84411	1.10037	4.40227	1.07123e-05	0.00015148
tnni4b.1	82.9881	-10.1654	2.30959	-4.40139	1.07561e-05	0.000151931
smarcb1b	64.6662	8.67276	1.97114	4.39986	1.08319e-05	0.000152835
rbck1	486.377	-2.20249	0.500755	-4.39834	1.09081e-05	0.00015374
fmo5	166.557	-6.47263	1.47189	-4.39749	1.09509e-05	0.000154176
l3mbtl3	104.317	8.19273	1.86318	4.39718	1.09666e-05	0.000154228
ampd3b	1299.22	-2.63458	0.599205	-4.39679	1.09866e-05	0.000154308
poll	80.8193	8.5606	1.9471	4.39659	1.09963e-05	0.000154308
bahcc1b	2888.71	2.34416	0.533244	4.39603	1.10248e-05	0.00015454
polr1e	84.3269	8.64923	1.96781	4.39537	1.10585e-05	0.000154843
cflarb	377.931	-2.52727	0.575168	-4.39396	1.11304e-05	0.000155681
itgb5	1759.26	-2.74702	0.625293	-4.39316	1.11714e-05	0.000156084
aes	181.423	4.86929	1.10858	4.39235	1.12132e-05	0.000156498
ddx10	338.368	-3.09601	0.704926	-4.39197	1.12329e-05	0.000156595
ccdc57	1488.06	-1.85263	0.421844	-4.39174	1.12445e-05	0.000156595
gorasp1a	94.9412	8.3585	1.90417	4.38959	1.13567e-05	0.000157858
antxr1c	353.52	-6.28206	1.43119	-4.3894	1.13663e-05	0.000157858
GFOD1	175.159	10.4241	2.37488	4.38929	1.13719e-05	0.000157858
gatad2b	350.448	2.98633	0.680861	4.3861	1.15398e-05	0.000160016
rab3il1	215.095	3.49573	0.797356	4.38415	1.16437e-05	0.000161282
atxn7l1	123.281	5.6708	1.29446	4.38082	1.18235e-05	0.000163597
BX276101.2	112.872	-4.73804	1.0822	-4.37815	1.19688e-05	0.00016541
erg	72.3055	-9.01508	2.0592	-4.37795	1.19803e-05	0.00016541
phtf2__2	69.1242	8.51909	1.94604	4.37765	1.19967e-05	0.00016546
abcg2a	63.5036	-8.30881	1.89849	-4.37654	1.20579e-05	0.000166126
mrpl33	88.9813	8.27033	1.88999	4.37586	1.20953e-05	0.000166462
cnksr3	112.923	8.29682	1.89734	4.37287	1.22623e-05	0.000168581
igf2bp3	106.894	4.97261	1.13741	4.37187	1.23184e-05	0.000169172
ms4a17a.10__2	4899.76	-2.19052	0.501154	-4.37095	1.23709e-05	0.00016971
uevld	102.78	8.50018	1.94523	4.36976	1.24383e-05	0.000170454
si:ch211-203d1.3	2374.79	1.66135	0.380348	4.36798	1.254e-05	0.000171575
fhod1	1910.56	-6.10744	1.39827	-4.36786	1.25468e-05	0.000171575
pnpla8	89.1436	8.65814	1.98235	4.36761	1.25613e-05	0.000171591
il1b	1034.79	-4.9991	1.14598	-4.36229	1.28708e-05	0.000175633
plin2	409.948	-4.57814	1.04957	-4.36192	1.28924e-05	0.00017574
eef2b	15274.1	-1.77867	0.408126	-4.35814	1.31174e-05	0.000178618
si:dkey-206d17.12	1324.91	-3.09492	0.710216	-4.35772	1.31423e-05	0.000178769
dnajc3b	124.616	5.84543	1.34155	4.35722	1.31723e-05	0.000178988
tulp4b	45.7841	-9.56151	2.19481	-4.35641	1.32211e-05	0.000179462
msrb3	119.842	7.64162	1.75462	4.35515	1.32976e-05	0.000180309
wsb1	4020.78	-2.00388	0.460249	-4.3539	1.33736e-05	0.000181149
cetn3	406.629	-4.1822	0.961816	-4.34823	1.37239e-05	0.000185698
mpc2	119.626	5.65828	1.30168	4.3469	1.38073e-05	0.000186631
srrm2	585.472	2.11268	0.486094	4.34623	1.38496e-05	0.000187005
bnip3lb	670.445	-2.49494	0.574385	-4.34367	1.40119e-05	0.000188999
si:dkey-11f4.16	88.679	6.61823	1.52415	4.34226	1.41028e-05	0.000190025
osbp	1926.73	-1.75795	0.405056	-4.34002	1.4247e-05	0.000191768
galnt18b	187.382	9.03263	2.08237	4.33767	1.43999e-05	0.000193624
aldh3a1	566.044	-6.0789	1.4015	-4.33741	1.44171e-05	0.000193653
imp4	78.8392	8.28256	1.9102	4.33597	1.45118e-05	0.000194722
slc15a2	106.767	-9.69572	2.2363	-4.3356	1.45364e-05	0.00019477
rpusd1	177.685	-4.02051	0.927356	-4.33546	1.45457e-05	0.00019477
zgc:162182	390.494	-4.44153	1.02477	-4.33417	1.46314e-05	0.000195714
rab9b	65.9731	8.54548	1.97264	4.33201	1.47756e-05	0.000197438
kat14	78.795	8.14561	1.88327	4.32526	1.52355e-05	0.000203372
sb:cb1058	107.801	-9.25665	2.14141	-4.32269	1.54138e-05	0.000205356
fgl2a	973.216	-5.59119	1.29346	-4.32266	1.54161e-05	0.000205356
tnfrsfa	1200.92	-5.77304	1.33569	-4.32213	1.54531e-05	0.000205636
gga3	531.266	-2.52009	0.58312	-4.32173	1.54812e-05	0.000205798
cebpb	7124.93	-3.46894	0.803368	-4.318	1.5745e-05	0.000209088
anxa11b	2918.53	1.79928	0.416752	4.31738	1.5789e-05	0.000209456
pgd	1158.22	-2.73142	0.632953	-4.31535	1.59347e-05	0.000211171
zfp64	125.963	7.60674	1.76541	4.30877	1.64168e-05	0.000216979
zgc:171727__1	102.161	5.96566	1.38456	4.30871	1.64209e-05	0.000216979
pbk	108.378	-7.34567	1.70489	-4.30859	1.64295e-05	0.000216979
huwe1	6828.12	1.63964	0.38058	4.30828	1.64528e-05	0.000216979
spns2	183.867	-6.7932	1.5768	-4.30822	1.64572e-05	0.000216979
gapvd1	2539.82	2.34506	0.544638	4.30571	1.66449e-05	0.000219228
akt3b	94.1358	9.54187	2.21668	4.30458	1.67305e-05	0.000220131
kbtbd4	77.9609	8.36177	1.94361	4.30218	1.69123e-05	0.000222296
il1fma	748.018	3.23583	0.75225	4.30154	1.69618e-05	0.000222719
nploc4	197.232	3.15064	0.733266	4.29673	1.73338e-05	0.000227372
traf5	57.709	8.59044	2.00038	4.29441	1.75155e-05	0.000229521
usp43a	67.6849	-8.15443	1.89931	-4.29336	1.7599e-05	0.000230381
si:ch211-281g13.5	232.924	-11.4319	2.66371	-4.29173	1.77287e-05	0.000231843
fam114a1	83.5881	-6.26427	1.45981	-4.29115	1.77751e-05	0.000232213
g3bp2	87.4264	7.93471	1.84966	4.28982	1.78821e-05	0.000233375
CABZ01019904.1	80.8855	-8.30394	1.93758	-4.28574	1.82134e-05	0.000237457
pfkfb4b	2421.03	-3.13521	0.731696	-4.28486	1.82856e-05	0.000238157
sav1	162.355	-10.6576	2.4883	-4.28311	1.843e-05	0.000239795
ikbkb	789.39	2.27009	0.530059	4.28272	1.84626e-05	0.000239976
klf7a	82.6461	7.82744	1.82784	4.28234	1.84936e-05	0.000240137
ehbp1	194.333	-6.0558	1.41473	-4.28052	1.86455e-05	0.000241865
si:dkey-260g12.1	106.084	6.56508	1.53491	4.27719	1.89266e-05	0.000245264
abraxas1	97.0903	7.43578	1.73993	4.27362	1.92324e-05	0.000248976
si:dkey-79d12.5	1011.62	-2.27694	0.533001	-4.27193	1.93786e-05	0.000250617
lingo4b	59.9937	8.88394	2.08044	4.27022	1.95285e-05	0.000252301
csrnp1b	3294.41	-2.06417	0.483471	-4.26948	1.95927e-05	0.000252878
svbp	72.4929	8.20293	1.92214	4.26761	1.97581e-05	0.000254756
cyp2k8	126.125	-9.12713	2.13996	-4.26508	1.99826e-05	0.000257394
rapgef6	3048.82	2.20651	0.517606	4.26291	2.01783e-05	0.000259655
si:dkey-14o6.1	79.1885	5.62705	1.32065	4.26082	2.03682e-05	0.000261837
tle3a	816.495	2.18564	0.513216	4.25871	2.0561e-05	0.000264051
nom1	108.584	8.09383	1.90116	4.25732	2.06892e-05	0.000265433
smox	9550.19	-1.61744	0.380057	-4.25579	2.08313e-05	0.000266989
atg2b	105.902	6.17411	1.45261	4.25035	2.13434e-05	0.00027328
fcer1g	6759.75	1.81921	0.428094	4.24956	2.14189e-05	0.000273974
prkdc	670.332	2.26936	0.534063	4.24924	2.14499e-05	0.000274098
slc36a1	676.183	-2.57064	0.605013	-4.24891	2.14817e-05	0.000274232
CABZ01068208.1	78.6939	8.26341	1.94539	4.24768	2.15994e-05	0.000275462
psmd12	137.279	5.74547	1.35268	4.24746	2.16212e-05	0.000275467
bcl2l10	1315.98	2.17056	0.511109	4.24676	2.16883e-05	0.000276048
gata3	127.141	9.92915	2.33826	4.24638	2.17256e-05	0.00027625
snx18a	2031.07	-1.74684	0.411396	-4.24613	2.17497e-05	0.000276283
sh3d21	56.4684	8.77008	2.06581	4.24534	2.18266e-05	0.000276986
paqr3b	93.2985	8.43661	1.98994	4.23962	2.239e-05	0.000283635
smcr8b	1245.32	5.00942	1.18159	4.23957	2.23946e-05	0.000283635
si:dkey-264f17.1	266.66	3.98253	0.939985	4.2368	2.2673e-05	0.0002868
pdha1a	192.575	4.58922	1.08322	4.23664	2.2689e-05	0.0002868
CABZ01048053.1	96.6695	5.06678	1.19637	4.23512	2.28432e-05	0.000288466
nop56	618.127	3.18435	0.751999	4.23451	2.29049e-05	0.000288961
chchd4a	66.7516	-9.51755	2.24901	-4.23189	2.31735e-05	0.000292064
zc3hc1	67.9054	8.47727	2.00362	4.23098	2.32677e-05	0.000292964
stra6l	67.8736	-8.64976	2.0458	-4.22805	2.3572e-05	0.000296505
apoob	60.6508	8.63434	2.04227	4.22782	2.35969e-05	0.000296528
ssh1a	3105.2	-2.49733	0.591231	-4.22396	2.4005e-05	0.000301362
gpr84	91.7291	-6.78691	1.60691	-4.22357	2.40463e-05	0.000301587
mgat2	97.8924	6.39367	1.51391	4.22328	2.40772e-05	0.000301681
CU896691.3	63.9482	8.42978	1.99638	4.22253	2.41571e-05	0.000302317
pir	65.2063	8.63313	2.04462	4.22237	2.4175e-05	0.000302317
tpra1	363.088	-2.87067	0.680406	-4.21905	2.45338e-05	0.000306505
dus3l	83.7367	8.36963	1.98388	4.21882	2.45586e-05	0.000306519
cdkn3	62.0869	8.84538	2.09679	4.21853	2.45901e-05	0.000306614
tufm	159.004	7.24636	1.71868	4.21623	2.48425e-05	0.000309272
tlr2	716.141	5.60576	1.32959	4.21615	2.48514e-05	0.000309272
tmem62	72.2003	8.34514	1.98009	4.21453	2.50304e-05	0.000311132
aspm	144.293	-8.60297	2.04135	-4.21436	2.50492e-05	0.000311132
glula	17084	-2.52217	0.59879	-4.21211	2.52992e-05	0.000313935
mtpap	72.4306	8.08648	1.92047	4.21069	2.54596e-05	0.00031562
rprd2b	412.593	2.85763	0.678975	4.20874	2.56798e-05	0.000317916
nusap1	86.5768	8.45911	2.00995	4.20861	2.56942e-05	0.000317916
gdpd1	118.992	6.52727	1.55174	4.20641	2.59462e-05	0.000320726
tmem167b	91.1121	7.3866	1.75668	4.20485	2.61252e-05	0.000322629
zgc:152791	93.8283	-10.0482	2.38994	-4.20438	2.61794e-05	0.000322989
zgc:110329	64.3094	8.67674	2.06511	4.20158	2.6506e-05	0.000326704
cdh18a	124.062	8.52074	2.02951	4.19843	2.68778e-05	0.000330535
si:dkey-195m11.11	73.2735	-6.60714	1.57376	-4.19832	2.689e-05	0.000330535
MFAP4 (1 of many)__3	139.973	-5.53102	1.31745	-4.19829	2.68938e-05	0.000330535
mrpl3	60.7013	8.28667	1.97669	4.19219	2.76275e-05	0.000339228
ggps1	447.156	-2.31204	0.551592	-4.19157	2.77033e-05	0.000339835
plxnc1	12642.2	1.70542	0.407132	4.18887	2.80349e-05	0.000343574
limd2	537.261	4.98516	1.19163	4.18347	2.87099e-05	0.000351512
dtx4	290.976	-4.393	1.05055	-4.18164	2.8942e-05	0.000354016
cdk6	2431.45	6.12204	1.46499	4.17889	2.92931e-05	0.000357971
slc45a4	2912.39	-2.44941	0.58635	-4.17738	2.9488e-05	0.000360011
zgc:165409	147.288	-3.38366	0.81044	-4.17509	2.97866e-05	0.000363312
trub2	70.9504	8.4991	2.03758	4.17116	3.03048e-05	0.000369282
si:dkey-21e5.1	85.2836	9.37921	2.24922	4.16999	3.04614e-05	0.00037084
si:dkey-87o1.2	112.654	9.80078	2.35099	4.16878	3.06232e-05	0.000372456
ror2	113.392	-9.18446	2.20337	-4.16836	3.06802e-05	0.000372798
nfe2l2a	2858.64	-1.71404	0.411411	-4.16624	3.09671e-05	0.000375929
slc25a36b	70.3095	8.29754	1.99275	4.16387	3.12899e-05	0.000379113
CABZ01118575.1	76.0558	9.21863	2.21397	4.16385	3.12933e-05	0.000379113
rcl1	81.5672	8.57811	2.06023	4.16367	3.13178e-05	0.000379113
eif4ebp1	1124.37	-2.44827	0.588571	-4.15969	3.18683e-05	0.000385415
pi4kaa	1758.96	1.63849	0.393958	4.15904	3.19591e-05	0.000386149
slc35c2	182.075	3.61	0.868756	4.15536	3.24771e-05	0.00039204
tsen15	57.0765	8.4111	2.02426	4.15514	3.25082e-05	0.000392049
scn4aa	59.3588	8.46044	2.03644	4.15453	3.25952e-05	0.000392729
ogdhb	1735.06	-1.79703	0.432575	-4.15427	3.2633e-05	0.000392817
atp6v1ab	475.503	-2.63964	0.635647	-4.15268	3.286e-05	0.000395179
neb	1016.27	3.17586	0.764843	4.15231	3.29141e-05	0.000395461
chst15	308.321	-5.71102	1.3756	-4.15166	3.30077e-05	0.000396216
ubp1	344.766	2.92468	0.70451	4.15138	3.30482e-05	0.000396332
acot11b	101.881	9.65599	2.32772	4.14826	3.35019e-05	0.000401399
TPPP	104.478	6.56921	1.58441	4.14615	3.38109e-05	0.000404725
cd226	91.9991	8.00348	1.9311	4.14452	3.40523e-05	0.000407235
irgf3	187.476	-4.15261	1.0022	-4.14349	3.42062e-05	0.000408695
tns3.1	490.678	-5.16625	1.24732	-4.14189	3.44463e-05	0.000411183
cdh4	171.267	7.24888	1.75046	4.14113	3.45596e-05	0.000412153
cita	86.6426	5.58102	1.34795	4.14037	3.4675e-05	0.000413146
mxe	251.209	-7.85713	1.89793	-4.13984	3.47548e-05	0.000413714
FAM72B	62.6012	8.62744	2.08425	4.13934	3.48299e-05	0.000414225
rpgrip1l	144.305	-5.03777	1.21718	-4.13887	3.49016e-05	0.000414694
si:ch73-217b7.1	55.9409	8.78594	2.12306	4.13834	3.49831e-05	0.000414973
fundc2	124.406	5.23726	1.26556	4.1383	3.49895e-05	0.000414973
cenpf	167.705	-6.80762	1.64697	-4.13343	3.57382e-05	0.000423462
ccnk	85.2581	7.82101	1.89229	4.13309	3.57924e-05	0.000423714
si:ch73-70k4.1	55.0421	8.42384	2.0387	4.13197	3.59674e-05	0.000425393
atf2	90.9718	7.435	1.79979	4.13104	3.61123e-05	0.000426715
yif1b	65.2	8.01756	1.94298	4.12643	3.68433e-05	0.000434953
hnrnpa0l__1	2094.23	-1.91753	0.464972	-4.12397	3.724e-05	0.000439234
b3gnt3.2	219.784	10.7585	2.60927	4.12318	3.73679e-05	0.000440339
zmp:0000000521	75.9524	8.80629	2.13616	4.12249	3.74792e-05	0.000441246
ndufa4	52.0992	8.44371	2.0485	4.12189	3.75772e-05	0.000441995
grid1b	81.0866	6.36869	1.54522	4.12154	3.76347e-05	0.000442267
cndp2	858.875	-3.76575	0.914998	-4.11558	3.86202e-05	0.000453435
mapk8ip3	2902.45	2.42241	0.588839	4.11388	3.89065e-05	0.00045638
parm1	762.423	3.65668	0.889602	4.11046	3.94865e-05	0.000462761
si:dkey-27b3.2	598.46	-2.08724	0.507832	-4.1101	3.95495e-05	0.000462884
nrd1a	656.07	2.6817	0.652485	4.10998	3.95689e-05	0.000462884
si:dkey-102c8.2__1	815.825	-3.35252	0.816681	-4.10505	4.04228e-05	0.000472313
dtd1	66.0329	8.2906	2.01968	4.1049	4.04483e-05	0.000472313
cxcr4b	1317.24	-3.18018	0.775286	-4.10195	4.09687e-05	0.000477956
akt3a	3102.76	1.8289	0.446459	4.09645	4.19527e-05	0.000488993
ftr72	159.371	-3.19887	0.781581	-4.09281	4.26169e-05	0.000496285
akr7a3	271.731	-3.04509	0.744478	-4.09023	4.3094e-05	0.000501386
atxn1b	74.5093	8.90881	2.17944	4.08765	4.35762e-05	0.000506539
si:ch211-256e16.11__2	65.2733	7.94152	1.94463	4.08382	4.43013e-05	0.000514076
madd	866.88	1.77494	0.434628	4.0838	4.43045e-05	0.000514076
slc4a2b	1448	-5.16933	1.26595	-4.08337	4.43869e-05	0.000514568
grk6	412.18	-2.24905	0.550857	-4.08282	4.4493e-05	0.000515334
mdga2a	140.258	10.1001	2.47394	4.08258	4.4539e-05	0.000515403
sema4bb	91.5629	9.47131	2.32048	4.08161	4.47248e-05	0.000517088
zgc:162193	85.1639	8.16487	2.00099	4.08041	4.49564e-05	0.000519299
exoc3l2b	328.347	-4.67242	1.14634	-4.07597	4.58235e-05	0.00052884
cbx7b	88.0795	6.41269	1.57431	4.07333	4.63456e-05	0.000534387
evpla	66.9087	6.62213	1.6259	4.07289	4.64339e-05	0.000534925
rangap1b	76.9141	8.08523	1.98557	4.07199	4.66135e-05	0.000536514
CT583642.2	79.1373	-8.7807	2.15689	-4.07101	4.68098e-05	0.000537801
zgc:165555__4	86.9164	-6.34952	1.55974	-4.07088	4.68369e-05	0.000537801
atp10d	3599.7	2.62332	0.644422	4.07081	4.68507e-05	0.000537801
hsd3b7	262.413	5.46743	1.34327	4.07024	4.69656e-05	0.00053864
zbtb8b	69.2456	7.86696	1.93294	4.06995	4.70224e-05	0.000538811
kpna5	414.913	2.37815	0.584369	4.06961	4.7092e-05	0.000539128
ehmt2	56.2199	8.1934	2.01469	4.06683	4.76571e-05	0.000545113
gtf3c2	82.7579	8.23887	2.02613	4.06632	4.7762e-05	0.000545694
mettl6	94.119	6.09397	1.4987	4.06617	4.77927e-05	0.000545694
nlrb5	90.0059	8.40397	2.06908	4.06169	4.87189e-05	0.000555776
si:ch211-153b23.7	1691.48	1.6499	0.406384	4.05994	4.90844e-05	0.000559449
2001-08-01	78.3662	6.20291	1.52822	4.0589	4.93048e-05	0.000561464
exosc4	58.4949	8.40181	2.07128	4.05633	4.9849e-05	0.000567159
zmym2	349.181	3.12566	0.770667	4.05579	4.99661e-05	0.000567989
atp6v1aa	732.663	-2.18489	0.538978	-4.05377	5.03983e-05	0.000572397
rhcga	70.4243	9.12189	2.25095	4.05246	5.06816e-05	0.000575107
ep300a	1232.76	2.32334	0.573388	4.05195	5.0792e-05	0.000575519
cops8	166.835	5.04716	1.24563	4.05188	5.08074e-05	0.000575519
fhl3a	636.078	-5.70205	1.40759	-4.05092	5.10158e-05	0.000577371
btbd11b	558.418	3.41287	0.842977	4.04859	5.15275e-05	0.00058265
coq9	61.9368	8.02748	1.98425	4.04561	5.21878e-05	0.000589598
si:dkey-85k7.12	3969.42	3.39258	0.839577	4.04082	5.32645e-05	0.000601235
slc25a42	67.3862	7.86131	1.94663	4.03841	5.38141e-05	0.000606906
dmd	128.082	-3.96882	0.983222	-4.03655	5.42434e-05	0.000611212
cables2b	193.867	9.07435	2.24837	4.03598	5.43754e-05	0.000612163
zdhhc24	65.9039	8.23732	2.04232	4.03332	5.49943e-05	0.00061859
rerea	1491.47	-1.7879	0.443401	-4.03224	5.52472e-05	0.000620891
uxt	61.293	8.25506	2.04848	4.02984	5.5815e-05	0.00062658
ftr02	59.4418	8.22574	2.04128	4.02969	5.58507e-05	0.00062658
hcst	2395.14	3.88097	0.963159	4.02942	5.59154e-05	0.000626759
lgals9l4	72.7508	-8.0663	2.00255	-4.02802	5.62476e-05	0.000629934
susd4	61.0638	-10.0129	2.48615	-4.02748	5.6377e-05	0.000630812
pepd	848.533	-2.95309	0.733325	-4.02698	5.64978e-05	0.000630812
irf2bp1	492.45	2.57149	0.638568	4.02696	5.65032e-05	0.000630812
pcdh18a	51.8899	8.25453	2.04986	4.02688	5.65221e-05	0.000630812
gfm1	87.868	7.8428	1.94894	4.02414	5.71835e-05	0.000637641
hhip	97.42	-10.6091	2.63724	-4.02279	5.75129e-05	0.000640759
tspan18a	144.156	-9.10206	2.26366	-4.02095	5.79639e-05	0.000645224
tmem18	102.827	4.50164	1.1199	4.01968	5.82778e-05	0.000648158
slc7a6	177.766	5.59533	1.39215	4.01921	5.83946e-05	0.000648896
itga3b	110.856	7.32021	1.82178	4.01816	5.86534e-05	0.000651108
dnajb12b	59.2472	8.31787	2.0702	4.0179	5.87194e-05	0.000651108
wdr4	65.2368	8.15923	2.03077	4.01779	5.87454e-05	0.000651108
mthfd1l	149.662	7.52882	1.87498	4.01542	5.9341e-05	0.000657143
kdm6a	1497.09	1.76944	0.440738	4.01471	5.95182e-05	0.000658538
gcdha	73.3869	7.77358	1.93678	4.01367	5.97815e-05	0.000660884
erbb2	80.7014	-9.64937	2.40587	-4.01076	6.05233e-05	0.000668509
clcn3	1712.81	-1.8508	0.461572	-4.00978	6.07766e-05	0.000670731
pdpk1a	181.216	3.70641	0.92446	4.00927	6.0906e-05	0.000671584
tfec	605.434	-2.85364	0.711878	-4.0086	6.10793e-05	0.000672918
si:ch211-157p22.10	243.142	3.2917	0.822286	4.00311	6.25146e-05	0.000687815
si:ch73-72b7.1	79.686	9.30136	2.32359	4.00302	6.25383e-05	0.000687815
ak3	599.305	-3.47948	0.869618	-4.00116	6.30332e-05	0.000692666
alg9	62.4213	8.04814	2.01284	3.9984	6.37727e-05	0.000700194
si:ch73-281f12.4	112.092	-5.66111	1.41678	-3.99577	6.44843e-05	0.000707403
zbtb46	548.677	-3.96924	0.993542	-3.99504	6.46844e-05	0.000708783
si:ch73-280o22.2	54.9294	8.39442	2.10128	3.9949	6.47202e-05	0.000708783
mfhas1	199.04	6.66073	1.66816	3.99287	6.52772e-05	0.000714275
si:ch211-286b4.4	12002.3	-3.03957	0.762107	-3.98838	6.65268e-05	0.000727329
gdf10a	66.159	8.7293	2.18885	3.98807	6.66137e-05	0.000727662
agtpbp1	203.279	3.38004	0.847714	3.98725	6.68446e-05	0.000729564
MCMDC2	49.9297	8.49114	2.13007	3.98632	6.71063e-05	0.0007318
lsm6	84.6288	6.41544	1.6097	3.98548	6.73449e-05	0.000733034
tspan2a	59.4975	8.71329	2.1863	3.98541	6.73642e-05	0.000733034
nsd2	52.4313	8.17476	2.05129	3.98519	6.74267e-05	0.000733034
pxnb	856.923	-2.80256	0.703257	-3.98512	6.74473e-05	0.000733034
rab1bb	47.0445	8.47635	2.128	3.98325	6.79803e-05	0.000738203
hdlbpa	1971.9	-1.65264	0.415031	-3.98198	6.83433e-05	0.000741519
ube2g2	81.5881	7.07188	1.77611	3.98167	6.84315e-05	0.000741851
eif4e2rs1	87.7685	6.10804	1.53417	3.98134	6.85273e-05	0.000742264
il11b	108.396	9.71615	2.44122	3.98004	6.89031e-05	0.000745707
si:cabz01074946.1	560.149	-2.73566	0.687682	-3.97809	6.94705e-05	0.000751215
si:ch211-253b8.5	59.1754	-9.07396	2.28298	-3.97462	7.04922e-05	0.000761624
ccdc14	68.6174	6.32865	1.5925	3.97402	7.06684e-05	0.000762887
ids	511.406	2.63663	0.663798	3.97203	7.12621e-05	0.000768651
tns3.2	625.58	-4.78291	1.20505	-3.96904	7.21629e-05	0.000777538
zic6	44.7768	8.36463	2.10755	3.96889	7.22069e-05	0.000777538
irak4	296.359	3.45004	0.869952	3.96578	7.31557e-05	0.000787097
plekhj1	452.695	2.08903	0.526902	3.96474	7.34758e-05	0.000789881
inpp5f	290.614	-3.50971	0.885451	-3.96375	7.37812e-05	0.000792501
zgc:174263	77.3986	5.32086	1.34275	3.96266	7.41194e-05	0.00079547
gpc1b	532.795	-5.31221	1.34082	-3.96191	7.43518e-05	0.0007973
si:ch73-376l24.6	140.67	3.24478	0.819245	3.9607	7.47302e-05	0.00080069
si:dkey-18a10.3	1715.7	-3.29354	0.831744	-3.9598	7.50111e-05	0.000803031
fybb	11041.4	1.32891	0.33566	3.95911	7.52294e-05	0.0008041
lrrk2	2921.36	-1.46723	0.370597	-3.95909	7.5236e-05	0.0008041
il21r.1	2094.09	2.5145	0.635193	3.95863	7.53805e-05	0.000804976
mettl4	52.2487	8.47928	2.14315	3.95646	7.60674e-05	0.000811638
ninl	103.654	9.66834	2.44463	3.95494	7.6554e-05	0.000816153
xkrx	260.32	5.23049	1.32281	3.95408	7.68311e-05	0.000818429
thrb	108.214	7.29268	1.84448	3.95379	7.69238e-05	0.000818739
zgc:152951	58.4662	8.5691	2.17036	3.94824	7.8729e-05	0.000837261
tamm41	78.9606	-10.0757	2.55246	-3.94747	7.89812e-05	0.000839249
gstp1	123.305	-5.1534	1.30619	-3.94538	7.96748e-05	0.00084592
hspa4a	4742.71	-1.56964	0.398108	-3.94275	8.0552e-05	0.000854529
c1qbp	99.1199	8.23626	2.09035	3.94013	8.14376e-05	0.000863212
mtap	263.168	4.41067	1.12033	3.93694	8.25287e-05	0.000874057
SLA (1 of many)	70.5542	-6.3656	1.61719	-3.9362	8.27808e-05	0.000876006
ddx49	65.0129	7.98901	2.03044	3.93461	8.3331e-05	0.000881103
mitfa	101.585	-7.2761	1.84943	-3.93423	8.34625e-05	0.000881769
stag1a	487.335	-2.86394	0.728045	-3.93374	8.36339e-05	0.000882856
dgcr6	64.2247	8.29799	2.11011	3.9325	8.40664e-05	0.000886694
taf1b	54.8638	7.96075	2.02542	3.93042	8.47983e-05	0.000893161
slc15a4	4965.97	1.61158	0.410033	3.93036	8.48183e-05	0.000893161
CABZ01112732.1	70.8488	8.95131	2.27888	3.92795	8.56734e-05	0.000900745
pip5k1ab	73.0651	7.76874	1.97782	3.92793	8.56786e-05	0.000900745
aldh1l2	69.2472	8.44427	2.15086	3.926	8.63704e-05	0.000907277
atp5mc1	88.7558	5.63577	1.43563	3.92565	8.64967e-05	0.000907862
si:ch211-140b10.6	50.1772	8.04227	2.05043	3.92225	8.77273e-05	0.000920028
rabgap1l	2475.53	2.10366	0.536419	3.92167	8.79387e-05	0.000921494
col4a3bpa	96.0224	4.97578	1.26926	3.92021	8.84704e-05	0.000926312
cd83	2118.14	-2.36223	0.603165	-3.91638	8.98876e-05	0.000940385
lyst	7501	1.59342	0.407189	3.91322	9.10733e-05	0.000952015
rnf152	44.0424	8.40577	2.14909	3.91131	9.17972e-05	0.000958804
hmgb3a	94.6779	7.26653	1.85903	3.90877	9.27683e-05	0.000967403
ippk	694.607	-2.14543	0.548877	-3.90876	9.27708e-05	0.000967403
khk	47.6414	8.25321	2.11215	3.90749	9.32617e-05	0.000971734
kin	59.701	7.73156	1.98011	3.90461	9.43761e-05	0.000982549
ttll7	44.6596	8.32042	2.13176	3.90308	9.49753e-05	0.000987281
rps8b	49.4215	8.56675	2.19488	3.90306	9.4984e-05	0.000987281
gpn2	54.4334	8.05302	2.06383	3.90198	9.54072e-05	0.00099088
tcf7l2	288.087	-2.85854	0.73302	-3.89968	9.63201e-05	0.000999554
si:ch211-225b11.4	149.941	5.81635	1.49159	3.89944	9.64147e-05	0.00099973
aste1a	557.481	-4.70262	1.20603	-3.89924	9.64951e-05	0.000999758
ndufaf1	57.3976	8.11904	2.08267	3.89837	9.68418e-05	0.00100254
fuca2	1701.98	-1.73829	0.446102	-3.89663	9.75414e-05	0.00100841
qki2	1520.7	-3.19606	0.820225	-3.89657	9.75656e-05	0.00100841
derl2	113.544	5.76511	1.48049	3.89407	9.85769e-05	0.00101805
fnta	114.553	4.01872	1.03214	3.89358	9.87754e-05	0.00101928
hdac9b	1544.81	-3.81726	0.980614	-3.89272	9.91271e-05	0.00102209
dram2b	526.036	2.08915	0.536873	3.89132	9.96998e-05	0.00102654
ptger4b	311.742	-3.2761	0.841959	-3.89104	9.98146e-05	0.00102654
nudt3b	94.41	5.50747	1.41548	3.8909	9.98742e-05	0.00102654
nacc1b	85.8128	7.98718	2.05279	3.89089	9.98777e-05	0.00102654
CR847844.1	115.382	9.8355	2.52982	3.88783	0.000101145	0.00103873
si:ch211-221j21.3	56.8826	8.35999	2.15053	3.88741	0.000101319	0.00103969
si:dkey-27h10.2	8719.34	-2.1788	0.560562	-3.88682	0.000101568	0.00104141
si:ch211-39k3.2	39.8705	-9.30876	2.39562	-3.88574	0.000102017	0.00104519
adam12	80.3234	-7.64241	1.96725	-3.88482	0.000102406	0.00104833
prkcdb	1258.74	-2.14129	0.551224	-3.88462	0.000102491	0.00104837
col19a1__1	87.641	8.01386	2.06317	3.88425	0.000102647	0.00104913
kifc3	94.7973	9.36454	2.41201	3.88246	0.000103405	0.00105604
actn4	3438.59	1.82174	0.469485	3.8803	0.00010433	0.00106464
wdr18	57.736	8.07339	2.08113	3.87934	0.00010474	0.00106798
zcchc7	98.8418	5.56285	1.43404	3.87914	0.000104826	0.00106801
gramd2aa	102.929	9.65485	2.48952	3.87819	0.000105235	0.00107133
nr4a1	5970.07	-2.5469	0.656961	-3.8768	0.000105841	0.00107665
qrfpr4	337.132	-5.71992	1.47678	-3.87323	0.000107403	0.00109167
hspbp1	326.992	-2.59822	0.671017	-3.87206	0.000107919	0.00109605
cdh11	138.208	8.5726	2.21448	3.87115	0.000108321	0.00109927
trmt13	79.1813	7.1205	1.83969	3.87049	0.000108616	0.00110139
si:ch211-278p9.2	102.079	-6.29141	1.62654	-3.86798	0.000109739	0.0011119
si:busm1-57f23.1	349.227	5.82151	1.50558	3.86662	0.000110354	0.00111726
irs2a	1063.56	-3.06557	0.792913	-3.86621	0.000110538	0.00111794
crcp	230.154	-3.0919	0.799784	-3.86591	0.000110674	0.00111794
txnipa	17038.9	-2.11127	0.546132	-3.86585	0.000110701	0.00111794
btk	1621.51	1.63623	0.423269	3.86571	0.000110769	0.00111794
lias	60.2872	7.89525	2.04296	3.86461	0.000111265	0.00112207
si:ch211-113a14.19__4	100.015	4.66823	1.20804	3.86429	0.000111413	0.00112268
mrps35	68.7247	5.73615	1.48576	3.86075	0.000113041	0.00113819
sem1	71.0158	7.5764	1.96256	3.86047	0.000113171	0.00113861
mrps9	75.6539	4.9462	1.28183	3.8587	0.000113993	0.00114598
slc47a2.2	157.376	-10.9948	2.84974	-3.85817	0.000114241	0.00114758
top3a	60.1776	7.80486	2.02392	3.85631	0.000115112	0.00115543
prpf19	144.208	5.38615	1.39696	3.85563	0.000115433	0.00115775
birc7	478.754	2.5527	0.662538	3.85292	0.000116719	0.00116974
si:dkeyp-80c12.4	239.906	3.04615	0.790745	3.85225	0.000117038	0.00117202
ppp1r13l	827.26	3.74904	0.973427	3.85139	0.00011745	0.00117523
CU984600.3	2260.9	1.46719	0.381138	3.84951	0.000118357	0.00118338
acot8	53.556	8.54281	2.21931	3.84931	0.000118449	0.00118338
med1	576.592	2.54589	0.661479	3.84878	0.000118707	0.00118505
rnf141	51.2141	8.0244	2.0856	3.84753	0.000119315	0.00119019
dnmt1	343.181	2.16808	0.56353	3.84732	0.000119419	0.0011903
auh	50.9553	7.88432	2.0497	3.84656	0.000119786	0.00119304
abhd6a	77.0844	7.61769	1.98093	3.84551	0.000120302	0.00119725
hivep3b	52.4174	8.50417	2.2131	3.84265	0.000121712	0.00121034
pgk1	1129.91	-1.89889	0.494437	-3.84052	0.000122773	0.00121995
nkiras2	52.4456	8.03834	2.09425	3.8383	0.00012389	0.00123011
si:ch211-214j8.12	58.0585	7.67353	2.00186	3.83321	0.000126483	0.00125489
PDCL3	47.0417	8.02844	2.09522	3.83178	0.000127218	0.00126121
nrxn2b	54.0746	8.52725	2.22634	3.83017	0.000128056	0.00126853
apbb1	260.58	2.45333	0.640644	3.82947	0.00012842	0.00127116
flt3	9152.75	5.59251	1.46077	3.82847	0.000128944	0.00127537
csnk1g2b	804.671	1.79574	0.469301	3.82641	0.000130026	0.00128508
si:ch211-284o19.8	113.433	4.23815	1.10787	3.8255	0.000130509	0.0012887
snx30	78.6691	7.35348	1.92231	3.82534	0.000130593	0.0012887
zgc:113436	54.4434	7.92455	2.07417	3.82059	0.000133133	0.00131276
plcd4b	64.657	-9.0262	2.36335	-3.81924	0.000133865	0.00131897
shmt2	58.4939	7.98605	2.09124	3.81882	0.000134091	0.00132019
mvb12a	48.2835	8.03017	2.10315	3.81816	0.00013445	0.00132271
arfip2a	219.84	3.65076	0.956494	3.81681	0.000135188	0.00132895
ska2	208.771	-2.83724	0.743394	-3.8166	0.000135304	0.00132908
ankrd33ba	108.051	9.71863	2.5468	3.81601	0.000135628	0.00133125
ptx4	439.161	-4.85005	1.27235	-3.8119	0.000137905	0.00135256
sil1	193.963	3.20304	0.840361	3.8115	0.000138126	0.0013537
ccdc125	96.4326	7.81942	2.05188	3.81085	0.00013849	0.00135623
si:ch73-147o17.1	57.8834	7.63187	2.00325	3.80975	0.000139107	0.00136119
si:ch73-158p21.3	3402.24	-1.56384	0.41052	-3.80941	0.000139297	0.00136119
plekhm2	622.422	-2.63947	0.692886	-3.80938	0.000139313	0.00136119
psma6b	66.4704	7.79237	2.04575	3.80905	0.000139501	0.00136198
fnbp1b__2	2571.28	1.42181	0.373362	3.80813	0.00014002	0.00136601
ube2w	54.4855	8.02059	2.11024	3.8008	0.000144231	0.00140603
ipcef1	1150.07	3.73854	0.983737	3.80035	0.000144491	0.0014075
marveld1	144.465	5.14806	1.35476	3.79999	0.000144701	0.00140811
slc9a3r1a	1238.41	2.88436	0.759069	3.79987	0.000144772	0.00140811
uhmk1	189.663	3.06704	0.807291	3.79917	0.000145182	0.00141102
tom1	135.321	-3.64991	0.960794	-3.79885	0.00014537	0.00141179
zanl	48.0159	8.4675	2.2301	3.79691	0.00014651	0.00142096
adora2ab	64.3001	8.55441	2.25302	3.79687	0.000146535	0.00142096
mob1bb	209.258	-3.87021	1.01946	-3.79632	0.00014686	0.00142304
gpr37a	1125.15	6.18599	1.63036	3.79425	0.000148089	0.00143387
spag7	326.437	-3.24607	0.855613	-3.79385	0.000148329	0.00143511
gemin2	52.7403	7.80276	2.05737	3.79259	0.000149086	0.00144135
kbtbd8	166.233	4.1575	1.09683	3.79047	0.000150364	0.00145262
faub	61.073	7.9464	2.09822	3.78722	0.000152343	0.00147063
si:dkey-120c6.5	40.4001	-8.37955	2.21449	-3.78396	0.000154355	0.00148894
cd209	259.203	5.69041	1.50427	3.78283	0.000155058	0.0014946
idh3b	140.827	5.10865	1.35152	3.77993	0.000156871	0.00151094
fgd4b	2195.27	1.84107	0.487135	3.77937	0.000157223	0.0015132
tyw5	119.391	4.16625	1.1028	3.77789	0.000158165	0.00152112
cdh2	205.345	3.81826	1.01112	3.77627	0.000159192	0.00152986
rer1	194.141	5.22621	1.3841	3.77588	0.000159443	0.00153026
mapk1	999.543	-3.00997	0.797183	-3.77576	0.000159518	0.00153026
tmc6b	135.573	4.80946	1.27381	3.77565	0.000159591	0.00153026
josd2	49.7445	7.82087	2.07157	3.77534	0.000159792	0.00153105
elovl5	157.276	4.04177	1.07068	3.77495	0.000160039	0.00153228
p2ry8	102.809	8.17736	2.16651	3.77444	0.00016037	0.00153431
si:dkey-4c23.4	160.313	-5.55071	1.47097	-3.77351	0.000160968	0.00153888
zgc:163143	43.4679	7.98559	2.11779	3.77071	0.000162783	0.00155508
si:dkey-75a21.2	192.081	4.96178	1.31656	3.76876	0.000164062	0.00156457
hnrnpa3	41.9371	8.32635	2.20937	3.76866	0.000164126	0.00156457
hps3	611.282	-2.42962	0.644696	-3.76864	0.000164142	0.00156457
edem3	528.471	-2.50319	0.664275	-3.7683	0.000164362	0.00156552
rell1	53.9732	7.6286	2.02462	3.76791	0.00016462	0.00156682
ndel1a	76.7221	5.93234	1.57536	3.7657	0.000166086	0.0015796
mbpa	2519.47	-1.82434	0.484598	-3.76465	0.000166782	0.00158504
zgc:113019	87.2164	5.71324	1.51826	3.76303	0.00016787	0.00159421
hgfb	226.735	-5.73216	1.52374	-3.7619	0.000168629	0.00160023
CABZ01068358.1	1527.01	-3.11166	0.827386	-3.76083	0.000169348	0.00160503
zgc:173709	73.6778	7.81276	2.07743	3.76078	0.000169384	0.00160503
lmbrd1	753.589	1.8722	0.498167	3.75818	0.000171151	0.00162059
ddx31	211.122	-2.79661	0.744274	-3.7575	0.000171618	0.00162381
mboat2a	670.228	-2.8907	0.769394	-3.75711	0.000171884	0.00162513
chuk	381.493	2.09057	0.556474	3.75682	0.000172085	0.00162583
zgc:113426	49.7612	8.04055	2.14038	3.7566	0.000172237	0.00162608
naa15a	326.579	2.6103	0.694925	3.75623	0.000172493	0.00162731
tcf3b	517.868	-2.21197	0.589103	-3.75481	0.000173472	0.00163534
map3k15	84.7215	6.59171	1.75592	3.754	0.000174037	0.00163946
bco1l	166.836	-9.94895	2.65173	-3.75188	0.000175516	0.00165219
morn4	44.7591	8.31669	2.217	3.75133	0.000175901	0.0016546
p2rx4a	72.564	7.65828	2.04181	3.75073	0.000176321	0.00165734
siae	111.014	3.9574	1.05533	3.74992	0.000176888	0.00166146
lims1	727.76	1.84543	0.492193	3.74941	0.000177252	0.00166366
si:ch1073-170o4.1	112.892	-4.95436	1.32188	-3.74796	0.000178279	0.00167208
bcr	1007.91	-5.86463	1.56506	-3.74723	0.000178799	0.00167574
samm50l	44.7842	7.9913	2.13355	3.74554	0.000180007	0.00168583
nup93	82.0407	7.39504	1.97633	3.74181	0.000182702	0.00170983
dcun1d2b	54.4196	-6.93385	1.85497	-3.73798	0.000185503	0.00173478
pnpo	65.3312	7.54342	2.02008	3.73423	0.000188294	0.00175959
rpl7l1	108.289	6.07791	1.6278	3.73382	0.000188601	0.00176119
ube2b	45.7096	7.92232	2.12261	3.73235	0.000189699	0.00177016
rgn	408.169	-4.88414	1.30877	-3.73187	0.000190065	0.00177229
rce1a	52.8594	7.67032	2.05721	3.72851	0.000192617	0.00179478
si:dkey-250k10.1	148.651	-3.38023	0.906741	-3.72789	0.000193087	0.001797
otub1a	144.516	4.90555	1.31593	3.72783	0.000193135	0.001797
prcp	480.207	-2.91833	0.783119	-3.72654	0.000194125	0.00180491
mlh1	42.2002	7.96404	2.13782	3.72531	0.000195073	0.00181241
ddit3	4308.56	-2.65099	0.712713	-3.71957	0.00019956	0.00185277
ppp6r2b	292.003	2.72029	0.731472	3.71893	0.00020007	0.00185617
zgc:158803	215.007	2.75555	0.740994	3.71872	0.000200235	0.00185635
bop1	85.41	7.52807	2.02575	3.71618	0.000202255	0.00187374
frmd4ba	394.806	-3.01508	0.811925	-3.7135	0.000204413	0.00189147
TESK1	47.0792	8.17689	2.20197	3.71344	0.000204463	0.00189147
ube2d4	50.7651	7.66712	2.06755	3.70831	0.000208649	0.00192752
pnp5a	356.62	-3.74083	1.00877	-3.70829	0.00020866	0.00192752
psma6l	55.6665	7.70289	2.07836	3.70624	0.000210362	0.00194092
si:ch211-235o23.1	597.581	-2.26385	0.610846	-3.70609	0.00021048	0.00194092
ints14	72.4552	5.86425	1.58237	3.70599	0.000210563	0.00194092
rpl4	6038.14	-1.56057	0.421134	-3.70564	0.000210854	0.00194185
cln8	63.9207	7.5675	2.04223	3.70551	0.000210965	0.00194185
im:7136021	117.037	-3.85706	1.04186	-3.7021	0.000213825	0.00196676
setbp1	64.633	8.91125	2.40725	3.70184	0.000214039	0.00196732
zgc:153733	794.992	1.86292	0.503468	3.70017	0.000215458	0.00197882
hook2__1	56.2787	7.84515	2.12031	3.7	0.000215597	0.00197882
si:dkey-11d18.4	77.4217	9.25969	2.50291	3.69957	0.000215965	0.00198078
ssbp4	113.89	-5.71568	1.54604	-3.69697	0.000218191	0.00199977
si:dkey-7i4.1	1840.57	-4.0005	1.0824	-3.69597	0.000219052	0.00200624
cables1	60.7725	7.47363	2.02301	3.69431	0.000220483	0.0020179
si:dkey-51d8.3__2	39.149	-9.37077	2.53718	-3.69338	0.000221292	0.00202353
si:ch211-199g17.9	40.9822	8.04564	2.17848	3.69324	0.000221412	0.00202353
ulk1b	490.588	-2.05417	0.556702	-3.68988	0.000224357	0.00204899
matn3a	55.7666	7.02219	1.9041	3.68793	0.000226089	0.00206334
eed	61.2849	7.80423	2.1182	3.68437	0.000229272	0.0020909
cep152	82.9273	7.78237	2.11407	3.68123	0.00023211	0.00211529
si:ch73-71c20.5	152.004	-2.79922	0.761025	-3.67822	0.000234863	0.00213887
osbpl10b	46.0626	-8.23633	2.24019	-3.67662	0.000236344	0.00215083
mboat2b	490.561	3.48989	0.949351	3.67608	0.000236843	0.00215333
ppp3r1a	176.776	2.93124	0.797408	3.67596	0.000236953	0.00215333
hs3st2	66.4115	9.0385	2.45903	3.67564	0.000237258	0.00215458
alg8	65.3641	5.19645	1.41386	3.67535	0.00023752	0.00215543
nlrc3	58.9469	8.78018	2.38959	3.67435	0.000238454	0.00216239
pdss1	73.8287	7.33761	1.99879	3.67102	0.000241587	0.00218926
serpine3	459.45	-4.93142	1.34361	-3.67026	0.000242299	0.00219416
dapp1	1117.18	3.51182	0.957164	3.66898	0.00024352	0.00220367
zgc:174917	52.727	8.57711	2.33791	3.6687	0.000243785	0.00220452
tob1b	974.09	-2.67719	0.729864	-3.66807	0.000244393	0.00220846
trmt1l	41.4971	7.92941	2.16523	3.66216	0.000250096	0.00225841
fahd2a	119.981	3.62357	0.989592	3.66168	0.00025057	0.0022611
fgf13a	39.0029	8.23586	2.24971	3.66085	0.000251383	0.00226685
slc22a18	136.131	5.15933	1.40999	3.65914	0.000253064	0.00228041
zgc:92360	56.5724	7.34047	2.00698	3.65748	0.000254712	0.00229366
irf2	1319.46	1.77939	0.48678	3.65543	0.000256748	0.00231037
scarb2a	3833.65	-1.56533	0.428518	-3.65289	0.000259307	0.00233177
dock10	15725.6	1.51552	0.414967	3.65215	0.00026005	0.00233682
l3mbtl2	51.1893	7.52836	2.06172	3.6515	0.000260717	0.00234117
USP34	1329.04	1.49618	0.409817	3.65085	0.000261378	0.00234548
BX323022.1	2423.11	2.52429	0.69151	3.6504	0.00026183	0.0023479
ppp4r1	174.775	4.37921	1.20009	3.64905	0.000263207	0.0023586
scinla	107.874	-8.72922	2.3927	-3.64828	0.000264002	0.00236408
pxna	741.926	5.42118	1.48675	3.64633	0.000266011	0.00238041
zgc:85936	48.439	8.17795	2.24336	3.6454	0.000266974	0.00238737
si:dkey-16m19.1	324.492	5.69323	1.56196	3.64494	0.000267458	0.00239003
notch3	69.0343	-10.0321	2.7525	-3.64472	0.000267687	0.00239042
mzt2b	40.6569	7.92554	2.17518	3.64363	0.000268817	0.0023977
anapc5	47.6137	7.91446	2.17217	3.64358	0.000268875	0.0023977
apbb2b	66.8519	-6.42167	1.76321	-3.64203	0.000270495	0.00241048
fbxo7	61.9862	6.80813	1.86979	3.64112	0.000271451	0.00241732
utp11l	67.7951	7.51983	2.06542	3.64083	0.000271764	0.00241844
lin9	88.5314	5.3424	1.46758	3.64028	0.000272337	0.00242186
mipol1	77.3754	9.24899	2.54407	3.63551	0.000277427	0.00246542
uchl5	49.3027	7.72551	2.12604	3.63376	0.00027932	0.00248053
fmnl2a	29.5565	-8.60307	2.36823	-3.6327	0.000280472	0.00248742
zbtb10	399.428	4.96138	1.36576	3.63269	0.000280482	0.00248742
celf2	3519.21	1.42051	0.39109	3.63218	0.000281038	0.00249063
plxnd1	1785.4	-5.09315	1.40253	-3.63139	0.000281899	0.00249654
klhdc3	41.8534	7.83242	2.15706	3.63107	0.000282249	0.0024969
slc35g2a	49.4341	8.60243	2.36916	3.631	0.000282327	0.0024969
fcho2	1932.23	-1.65769	0.456674	-3.62991	0.000283518	0.0025057
kdm2bb	913.002	2.44153	0.672699	3.62945	0.000284022	0.00250641
abi1a	1220.21	-2.00288	0.551862	-3.62932	0.00028417	0.00250641
traf3ip2l	82.3136	9.34593	2.57513	3.6293	0.000284191	0.00250641
rogdi	78.152	5.367	1.47887	3.62913	0.000284377	0.00250641
rap2c	185.971	4.51133	1.24361	3.62761	0.000286061	0.00251953
slc29a2	48.418	8.41346	2.31949	3.62728	0.00028642	0.00252097
nle1	81.47	7.43534	2.05013	3.62676	0.000286999	0.00252434
CABZ01059406.1	355.063	-3.11367	0.858965	-3.62491	0.000289058	0.00254025
tnfaip8l2b	382.264	-3.05173	0.841907	-3.62478	0.000289203	0.00254025
RNF14 (1 of many)__1	41.2968	7.82742	2.16076	3.62253	0.000291735	0.00256074
pacs1a	727.466	3.84391	1.06123	3.62212	0.000292198	0.00256305
NRXN2	46.6191	8.30572	2.29372	3.62107	0.000293388	0.00257174
MCUR1	62.1451	7.44538	2.05682	3.61985	0.000294771	0.0025821
myo9b	4999.29	1.36442	0.377179	3.61743	0.000297538	0.00260458
abcc4	960.101	2.30697	0.637847	3.6168	0.000298265	0.00260916
erc2	63.9736	-8.60046	2.37828	-3.61626	0.000298892	0.00261287
si:ch211-112c15.8	108.478	9.74646	2.69569	3.61557	0.000299687	0.00261804
tmem42b	55.8859	7.95334	2.20042	3.61446	0.000300976	0.00262402
si:dkey-23k10.3	104.977	-5.67174	1.56924	-3.61431	0.000301147	0.00262402
atad5b	42.7047	7.76558	2.14859	3.61427	0.0003012	0.00262402
usp42	335.652	2.40029	0.664128	3.6142	0.000301282	0.00262402
ftr91	193.048	-3.79597	1.05032	-3.6141	0.000301392	0.00262402
zgc:173570	39.7249	7.87066	2.17808	3.61358	0.000301995	0.0026275
tlr7__2	46.7567	8.36609	2.31663	3.61132	0.000304645	0.00264876
rangrf	45.2013	7.65651	2.12034	3.61098	0.000305037	0.00265038
bcap29	190.506	3.15861	0.874785	3.61073	0.000305342	0.00265124
XPO5	57.3567	7.44671	2.06268	3.61022	0.00030594	0.00265464
ZNF821	43.1935	7.8333	2.17065	3.60873	0.000307701	0.00266813
arl14ep	41.9743	7.70393	2.1368	3.60537	0.000311712	0.00270108
cnot6b	369.955	4.30054	1.19315	3.60437	0.000312916	0.00270969
slc31a1	1324.58	-1.70841	0.47434	-3.60166	0.000316196	0.00273625
znf106b	56.0368	7.77476	2.15907	3.60098	0.000317018	0.00274152
zbtb1	88.7738	6.31397	1.7538	3.60017	0.000318009	0.00274824
wdr41	595.528	1.97905	0.550017	3.59816	0.000320474	0.00276769
hhat	72.5767	-7.61727	2.118	-3.59644	0.000322606	0.00278424
smad1	96.9501	-8.42913	2.34443	-3.59538	0.00032392	0.0027937
tarbp2	77.0515	6.7675	1.88238	3.59518	0.000324171	0.00279399
si:ch211-11k18.4	56.427	7.62564	2.12152	3.59441	0.000325123	0.00280032
dglucy	68.3916	5.55333	1.5452	3.59392	0.000325737	0.00280307
atxn1a	648.775	-1.87331	0.521259	-3.59381	0.000325877	0.00280307
zgc:173742	984.03	12.9254	3.59688	3.59351	0.000326259	0.00280448
tmem175	49.6202	7.64137	2.12676	3.59297	0.000326935	0.00280841
tmem147	104.095	6.472	1.80172	3.59212	0.000327999	0.00281567
magoh	82.4452	5.76167	1.60419	3.59164	0.000328605	0.00281899
sgcb	52.3982	8.54849	2.38136	3.58975	0.000330995	0.00283761
zgc:171759__1	66.7007	4.84898	1.35147	3.58793	0.000333317	0.0028555
rps15a	3156.78	-1.68996	0.471039	-3.58773	0.00033357	0.0028555
marcksl1b	197.116	-2.65354	0.739645	-3.58759	0.000333748	0.0028555
ets2	1401.18	-3.14557	0.877441	-3.58494	0.000337159	0.00288277
ints9	53.3572	7.35085	2.05191	3.58244	0.000340395	0.00290764
timm10b	41.0652	-6.5937	1.84061	-3.58235	0.00034052	0.00290764
f3b	54.8341	-9.48411	2.6486	-3.5808	0.00034255	0.00292303
b4galt3	55.1178	8.09273	2.2602	3.58055	0.000342876	0.00292387
CABZ01117752.1	203.029	-4.98869	1.39346	-3.58007	0.000343508	0.00292733
zgc:152863	1053.36	1.65258	0.46199	3.57709	0.000347435	0.00295883
stat1a	2052.02	-1.67656	0.468836	-3.57601	0.000348874	0.00296801
rtkn2a	34.3014	-9.04163	2.52846	-3.57594	0.000348974	0.00296801
ethe1	41.8526	7.70899	2.15714	3.57371	0.000351957	0.0029914
as3mt	94.643	7.2713	2.03537	3.57247	0.000353627	0.00300361
tmem60	46.5808	7.74936	2.16982	3.57143	0.000355042	0.00301364
ntng2a	415.92	5.14817	1.44215	3.56979	0.000357269	0.00303054
cxcl8b.1	94.5671	-10.4223	2.92414	-3.56423	0.000364932	0.00309351
spaca4l	70.5694	7.70187	2.16123	3.56366	0.000365723	0.00309818
NPC2 (1 of many)	73.5644	-8.06933	2.26476	-3.563	0.000366637	0.00310375
cox15	44.1495	7.53288	2.11429	3.56284	0.000366864	0.00310375
fam13b	2940.32	1.33161	0.374016	3.5603	0.000370436	0.00313191
vapb	361.713	2.05209	0.57661	3.55889	0.000372425	0.00314632
si:dkey-93n13.1	74.7706	6.76877	1.90201	3.55875	0.000372629	0.00314632
si:zfos-2326c3.2	1378.08	-1.88767	0.53054	-3.55801	0.000373674	0.00315308
rft1	52.9816	6.8298	1.92087	3.55557	0.000377161	0.00318042
slc25a46	94.5385	5.80041	1.63202	3.55414	0.000379222	0.0031957
nalcn	132.344	8.51785	2.39703	3.5535	0.000380143	0.00320136
dub	485.57	3.99055	1.12311	3.55313	0.000380683	0.00320381
lgals2a	869.295	-2.75608	0.775857	-3.5523	0.00038188	0.00321178
acvrl1	736.442	-4.75013	1.33946	-3.54631	0.00039066	0.00328112
zbtb39	71.1653	5.57924	1.57329	3.54622	0.000390805	0.00328112
si:dkey-118k5.3	692.755	-2.6277	0.740999	-3.54616	0.000390888	0.00328112
mfsd6a	281.544	3.48961	0.984354	3.54507	0.000392502	0.00329252
zgc:101716	47.8006	7.37575	2.08141	3.54364	0.000394642	0.00330664
si:dkey-40c23.1	36.9821	8.01877	2.26289	3.5436	0.0003947	0.00330664
fus	447.722	3.00052	0.846857	3.54312	0.000395416	0.00331048
cbx4	47.3647	6.96666	1.96638	3.54288	0.000395784	0.00331141
si:ch211-194b1.1	56.2812	7.0277	1.98526	3.53993	0.00040023	0.00334643
cacna1ba	35.1517	8.04764	2.27357	3.53964	0.000400673	0.00334796
si:ch211-253b8.2	85.5039	5.46191	1.54333	3.53904	0.000401581	0.00334936
sept8a	45.7326	8.1934	2.31525	3.53888	0.00040183	0.00334936
ssbp3b	701.338	2.23951	0.632837	3.53883	0.000401898	0.00334936
max	612.185	2.89413	0.817821	3.53883	0.000401903	0.00334936
apool	57.1681	7.54829	2.13308	3.53867	0.000402142	0.00334936
si:dkey-192g7.3	1946.99	-5.5257	1.56291	-3.53552	0.000406971	0.00338739
si:dkey-148a17.5	478.306	2.9419	0.832241	3.53492	0.000407903	0.00339295
omgb	37.1938	8.02714	2.27097	3.53467	0.000408285	0.00339393
cdip1	58.2326	-9.78508	2.77024	-3.53221	0.000412098	0.00342342
gpr61l	40.1093	8.11289	2.29799	3.53044	0.000414874	0.00344115
ATP9A	213.049	2.74786	0.778337	3.53043	0.000414893	0.00344115
ndufs7	49.9253	7.32561	2.07505	3.53033	0.000415035	0.00344115
ehhadh	37.7071	7.83695	2.22156	3.52768	0.000419212	0.00347355
tmem241	49.0743	8.29958	2.35296	3.52729	0.000419836	0.00347648
SRBD1	40.1988	7.69468	2.18261	3.52545	0.000422766	0.0034967
phb2a	222.826	-2.80789	0.79647	-3.52541	0.000422821	0.0034967
pla2g4f.1	38.5544	8.13583	2.30794	3.52516	0.000423234	0.00349786
slc8a2b	45.7308	8.42954	2.39188	3.52422	0.000424724	0.00350792
ptprc	11654.9	1.31029	0.37197	3.52256	0.000427406	0.00352781
polb	46.4221	7.54817	2.14485	3.5192	0.000432849	0.00357045
mafaa	136.961	-8.21095	2.33403	-3.51793	0.000434934	0.00358535
si:ch211-235i11.4	39.7048	7.83925	2.22877	3.51731	0.000435952	0.00359144
cul5a	1556.81	-1.91079	0.543461	-3.51596	0.00043816	0.00360732
phf20b	2381.24	1.90061	0.540624	3.51558	0.000438798	0.00361027
tmem53	42.5106	7.92161	2.25474	3.51331	0.000442565	0.00363893
entr1	75.0886	5.39107	1.53706	3.50739	0.000452522	0.00371843
acp2	501.939	-2.98528	0.851537	-3.50576	0.000455307	0.00373892
porb	756.093	-2.07938	0.593562	-3.50323	0.000459651	0.00377218
tmed8	99.7287	4.99881	1.42716	3.50264	0.000460678	0.0037782
tec	325.856	-4.51252	1.28906	-3.50063	0.000464168	0.00380358
glipr2	1853.58	-1.42238	0.406334	-3.50051	0.000464364	0.00380358
sgk2b	50.3548	-7.90701	2.25912	-3.50004	0.000465195	0.00380797
dbnlb	2487.05	1.69184	0.483412	3.49979	0.000465624	0.00380906
BX510922.2	51.7649	-9.68938	2.77104	-3.49666	0.000471122	0.00385159
adat3	42.8894	7.52459	2.15321	3.49458	0.000474801	0.0038792
FAM83G	1495.47	-2.82881	0.809723	-3.49356	0.000476629	0.00389167
ddhd2	59.3533	7.63883	2.18687	3.49304	0.000477552	0.00389673
hmbsb	57.7125	8.28497	2.37259	3.49195	0.000479512	0.00390843
CABZ01090373.1	45.0316	7.51198	2.15126	3.4919	0.000479593	0.00390843
mtss1	149.302	-7.7381	2.21633	-3.4914	0.000480504	0.00391337
snx13	511.86	-1.71111	0.490134	-3.49111	0.000481024	0.00391513
rbm47	6818.48	1.1473	0.329039	3.48682	0.000488798	0.00397589
mtss1la	2658.68	-5.43241	1.55806	-3.48665	0.000489117	0.00397597
mag	49.7134	7.63385	2.1909	3.48434	0.000493348	0.00400783
galnt1	1114.02	1.86745	0.536047	3.48373	0.000494472	0.00401442
si:dkey-222h21.10__2	40.4874	7.65333	2.1978	3.48227	0.000497186	0.00403391
phlda3	65.2838	8.43836	2.42521	3.47944	0.000502468	0.0040742
ireb2	296.512	2.97956	0.856391	3.47921	0.000502902	0.00407515
kank4	37.8381	8.09268	2.32699	3.47774	0.000505658	0.00409301
COX5B	487.526	-2.04401	0.587747	-3.4777	0.000505742	0.00409301
aspg	43.3275	8.15001	2.34362	3.47753	0.000506064	0.00409304
zgc:153115	121.721	5.65747	1.6274	3.4764	0.000508202	0.00410775
si:dkey-53k12.1	438.277	5.15874	1.48432	3.4755	0.000509911	0.00411898
flj11011l	38.8942	7.62523	2.19412	3.47531	0.00051027	0.0041193
mrrf	38.1437	7.72638	2.22474	3.47293	0.000514809	0.00415333
sigmar1	70.7488	-5.77338	1.66294	-3.47178	0.000517021	0.00416645
cyb5b	259.31	-2.97263	0.856234	-3.47175	0.000517083	0.00416645
pard6b	39.2112	7.86744	2.26769	3.46937	0.000521679	0.00419941
cited4a	323.964	-4.16788	1.20136	-3.4693	0.000521826	0.00419941
glyctk	37.6342	7.73024	2.2287	3.46849	0.000523385	0.00420932
si:ch211-234h8.7	64.8462	9.00397	2.59658	3.46763	0.000525067	0.00422021
uap1l1	1160.4	-1.84144	0.531161	-3.46681	0.000526671	0.00423046
hibadhb	115.74	4.28011	1.23521	3.46508	0.00053007	0.00425428
mknk2a	221.308	-5.21722	1.50571	-3.46497	0.000530297	0.00425428
ilkap	62.3853	4.77221	1.37756	3.46426	0.0005317	0.00426078
rab23	49.758	7.17718	2.0718	3.46422	0.00053177	0.00426078
itpk1b	484.263	2.00429	0.578828	3.46267	0.000534844	0.00428274
riox2	64.7416	6.56409	1.89593	3.46221	0.000535764	0.00428744
rrm1	77.8061	4.22216	1.21966	3.46174	0.000536692	0.0042922
vamp8	246.209	2.91759	0.843352	3.45952	0.00054114	0.00432509
si:dkey-22o12.2	1284.71	1.67754	0.485328	3.4565	0.00054723	0.00437105
helz2	936.996	-5.10871	1.47823	-3.45596	0.000548343	0.00437722
bcor	3501.6	1.4127	0.409109	3.45311	0.000554168	0.00442038
scrib	3483.82	1.8953	0.548889	3.45298	0.000554437	0.00442038
mcm3	73.6504	6.12859	1.77702	3.44881	0.000563072	0.00448644
ehd2a	352.466	-4.63602	1.3444	-3.44839	0.000563932	0.00449052
ctbp2a	47.4766	-9.54772	2.77185	-3.44453	0.00057205	0.00455235
abcb8	118.881	-2.85878	0.830111	-3.44385	0.000573503	0.00456109
ctsh	1241.78	-2.04202	0.592984	-3.44364	0.000573939	0.00456173
hyi	58.6733	7.67829	2.22987	3.44337	0.000574506	0.00456342
si:ch211-59d17.3	222.654	4.99802	1.45189	3.44243	0.000576513	0.00457654
vaspa	689.673	-2.94507	0.856214	-3.43964	0.00058248	0.00462105
COQ10A	57.4618	5.33416	1.55128	3.43856	0.000584816	0.00463673
kif20bb	53.2262	7.19935	2.09619	3.43449	0.000593674	0.00470407
adh5	178.168	-2.79425	0.813782	-3.43366	0.000595498	0.00471374
adam10b	72.11	6.47574	1.88599	3.4336	0.000595628	0.00471374
washc2c	2257.26	-1.95749	0.570136	-3.43337	0.000596121	0.00471474
mcu	416.085	3.93177	1.14529	3.43299	0.000596975	0.00471859
zgc:162707	667.055	-3.46787	1.01039	-3.43222	0.000598661	0.00472902
chid1	133.3	4.93476	1.43832	3.43091	0.000601564	0.00474904
oaz2a	53.4443	8.47077	2.46968	3.4299	0.000603802	0.00476212
atf1	452.322	1.73302	0.505278	3.42983	0.000603962	0.00476212
ascc1	46.5101	7.21533	2.10466	3.42827	0.000607445	0.00478471
ephx2	1540.16	-2.70905	0.790223	-3.42821	0.000607571	0.00478471
eef1akmt2	48.2263	7.68462	2.24258	3.42669	0.000610983	0.00480864
slc41a1	72.5154	9.15361	2.6717	3.42613	0.000612246	0.00481457
hps1	245.929	3.61577	1.05538	3.42602	0.000612484	0.00481457
lamp1b	248.984	-3.38165	0.987165	-3.42562	0.000613392	0.00481876
exoc6	1048.95	1.93451	0.565144	3.42304	0.000619245	0.00486177
cox7a2l	277.888	-2.56691	0.750001	-3.42254	0.000620379	0.00486771
polr2i	38.5521	7.47967	2.18561	3.42223	0.000621089	0.0048703
dph6	49.4479	7.58868	2.21769	3.42188	0.000621892	0.00487107
si:dkeyp-71f10.5	69.0448	5.76042	1.68342	3.42186	0.000621943	0.00487107
slc25a26	56.6547	6.53687	1.91079	3.42103	0.00062385	0.00487904
btr25	39.8187	7.87177	2.301	3.42102	0.000623857	0.00487904
spdl1	34.9339	-7.80181	2.28062	-3.42092	0.000624098	0.00487904
ulk3	42.3858	7.30797	2.13676	3.42011	0.000625961	0.00489063
aar2	37.61	7.56756	2.21285	3.41983	0.000626612	0.00489275
si:ch73-174h16.4	41.3901	7.4328	2.17395	3.41904	0.000628431	0.00490283
arf1	482.662	-2.36279	0.69109	-3.41894	0.000628666	0.00490283
cds1	138.572	-3.01691	0.882532	-3.41847	0.000629735	0.00490819
CR392335.1	86.5531	3.72873	1.09084	3.41822	0.000630313	0.00490883
ap4b1	45.3772	7.62159	2.22977	3.41811	0.00063058	0.00490883
ier5l	81.989	-8.05464	2.35721	-3.41702	0.000633099	0.00492546
rtcb	54.1779	7.07699	2.0715	3.41636	0.000634645	0.00493276
slc40a1	714.554	-3.20339	0.937682	-3.41629	0.000634804	0.00493276
tmem42a	66.2333	6.81777	1.9963	3.41521	0.000637327	0.0049469
myo9ab	2167.65	2.2912	0.670888	3.41518	0.000637392	0.0049469
nudt8	49.4561	7.15772	2.09683	3.41359	0.000641137	0.0049711
apbb1ip	2877.44	-1.76477	0.516992	-3.41353	0.000641282	0.0049711
dyrk4	44.491	-7.79311	2.28436	-3.41151	0.000646049	0.00500503
dtna	33.1962	7.82284	2.29409	3.41	0.000649626	0.00502971
foxp1a	207.306	-2.55696	0.749967	-3.40943	0.000650986	0.00503721
brip1	43.2731	8.15499	2.39213	3.40909	0.000651794	0.00503787
nmd3	81.1387	5.73212	1.68143	3.40907	0.000651853	0.00503787
tlk1a	343.562	2.30931	0.67764	3.40787	0.000654731	0.00505707
uhrf1bp1l	2569.03	1.50251	0.441288	3.40483	0.000662056	0.00511058
rnd2	73.1451	-4.72463	1.38784	-3.40429	0.000663352	0.00511751
si:ch211-256e16.3	52.1337	7.67834	2.25566	3.40403	0.000664004	0.00511948
wdr55	125.145	-2.9873	0.877803	-3.40315	0.000666137	0.00513039
prelid3b	1334.05	-1.98244	0.582538	-3.40312	0.000666217	0.00513039
pin1	109.185	4.47898	1.31649	3.40221	0.000668443	0.00514445
slc25a40	65.7891	5.82603	1.71266	3.40174	0.000669593	0.00515022
capza1b	1769.13	1.33043	0.391515	3.39815	0.000678431	0.00521508
rpl11	1832.35	-1.98685	0.585276	-3.39472	0.000687	0.0052778
cyp20a1	458.958	-2.45711	0.72399	-3.39384	0.000689198	0.00529153
ano5a	83.9264	7.93801	2.33935	3.39326	0.000690664	0.00529962
zgc:193801	39.7405	7.4256	2.18875	3.39262	0.000692268	0.00530832
si:dkey-16p6.1__5	99.3181	3.5077	1.03398	3.39243	0.000692759	0.00530832
RNF122	356.197	-2.82937	0.834051	-3.39232	0.000693035	0.00530832
slc2a12	225.469	-5.04215	1.48678	-3.39133	0.000695534	0.00532429
cadm2a	214.84	4.92924	1.4556	3.38641	0.000708144	0.0054176
epha7	113.373	-7.87881	2.32764	-3.3849	0.000712044	0.0054442
eral1	174.541	3.20416	0.947006	3.38346	0.000715776	0.00546948
kctd6b	80.812	5.28075	1.56083	3.38329	0.000716237	0.00546975
arfgef1	924.298	1.8476	0.546184	3.38274	0.000717671	0.00547746
ikzf5	355.402	1.97976	0.58545	3.38161	0.00072063	0.00549678
elp2	68.4968	7.39593	2.189	3.37868	0.000728355	0.00555241
amot	565.576	2.35578	0.697599	3.37698	0.000732866	0.00558349
higd1a	824.408	-2.44408	0.72384	-3.37655	0.000734023	0.005589
nit2	41.8168	7.39872	2.19176	3.37569	0.000736307	0.00560307
si:ch73-233m11.2	271.979	2.34674	0.695276	3.37527	0.000737446	0.00560843
PDE3B	756.342	2.02992	0.601467	3.37495	0.000738284	0.0056107
pitpnbl	179.06	-2.52544	0.748315	-3.37483	0.000738618	0.0056107
hebp2	92.3273	6.33317	1.8774	3.37338	0.000742514	0.00563697
prps1b	56.1474	6.88805	2.04206	3.37309	0.000743308	0.00563967
cstf3	379.033	3.68763	1.0934	3.37264	0.000744519	0.00564553
mogs	121.157	5.03901	1.49435	3.37205	0.000746112	0.00565428
ypel3	139.994	3.79831	1.12659	3.37151	0.00074756	0.00566192
supt3h	96.3695	4.22109	1.25294	3.36896	0.000754532	0.00571136
tmem242	57.2328	7.43999	2.20899	3.36805	0.000757014	0.00572678
junbb	2929.44	-2.29701	0.682208	-3.36701	0.000759866	0.00574297
kif15	51.1832	5.26279	1.5631	3.3669	0.000760181	0.00574297
gabbr1a	252.192	-2.36715	0.703088	-3.36679	0.000760493	0.00574297
si:ch73-334d15.2	51.6073	8.66922	2.576	3.36539	0.000764366	0.00576884
mthfd1a	39.9798	7.59257	2.25628	3.36509	0.0007652	0.00577174
lpar6a	729.479	-2.34747	0.697806	-3.36406	0.000768035	0.00578973
kat6a	1951.13	1.34554	0.400028	3.36361	0.000769306	0.00579592
snx10b	162.813	-5.03902	1.49838	-3.36297	0.000771096	0.00580284
ca5a	594.837	-1.81265	0.539004	-3.36296	0.000771127	0.00580284
snx6	386.823	2.2751	0.676585	3.36262	0.000772058	0.00580646
trappc6b	54.2655	7.94591	2.36374	3.36158	0.000774975	0.00582261
si:ch211-213a13.2__2	45.3799	7.09283	2.11011	3.36135	0.000775627	0.00582261
rock2a	862.53	2.09261	0.622551	3.36135	0.00077563	0.00582261
xkr8.2	44.5928	7.7319	2.30033	3.36121	0.000776017	0.00582261
tmem187	41.6189	7.27211	2.16414	3.36027	0.00077867	0.0058335
zgc:110239	975.607	-1.58282	0.471043	-3.36025	0.000778716	0.0058335
si:dkey-82k12.13	120.76	-9.23565	2.74858	-3.36015	0.000779003	0.0058335
arhgap1	1464.53	2.28865	0.681136	3.36005	0.000779281	0.0058335
dapk2a	89.6785	9.4078	2.80013	3.35977	0.000780064	0.00583597
nars2	59.8281	6.41016	1.90846	3.3588	0.00078281	0.00585311
bpnt1	64.7608	6.26143	1.86428	3.35863	0.000783304	0.0058534
si:ch211-214b16.3	79.3109	3.7853	1.12751	3.35721	0.000787331	0.00587779
prkn	41.1273	7.59327	2.26181	3.35716	0.000787481	0.00587779
CABZ01029938.1	272.53	2.33937	0.696964	3.35652	0.000789308	0.00588801
abhd10a	128.347	-2.88873	0.860918	-3.35541	0.000792486	0.00590558
sergef	38.8693	7.33633	2.18644	3.35537	0.000792581	0.00590558
si:dkey-58f10.11	195.016	-2.8019	0.835094	-3.35519	0.000793107	0.00590608
si:dkey-21c1.4	31.7556	7.8159	2.32982	3.35473	0.00079443	0.00591251
bptf	2729.63	1.27149	0.379225	3.35287	0.000799775	0.00594885
nadka__2	283.433	-3.20881	0.957142	-3.35248	0.000800897	0.00595375
epdl1	1650.01	4.208	1.25534	3.35207	0.000802106	0.0059593
nudt5	51.3635	7.11486	2.12301	3.35131	0.000804295	0.00597211
bambib	35.3227	7.93159	2.3672	3.35062	0.000806299	0.00598354
neo1b__1	101.252	8.11041	2.42102	3.34999	0.000808145	0.00599378
ndufa12	44.0779	7.36556	2.19907	3.34939	0.000809892	0.00600181
alkbh8	47.4923	7.35339	2.1955	3.3493	0.000810161	0.00600181
ubac2	188.961	2.76755	0.826539	3.34836	0.000812916	0.00601876
cgnl1	67.8155	5.32278	1.58993	3.34781	0.000814537	0.00602627
nfatc1	102.233	7.99293	2.38759	3.34769	0.000814867	0.00602627
nsl1	55.6536	8.78355	2.62395	3.34745	0.00081559	0.00602815
ftsj3	126.786	4.54606	1.35816	3.34722	0.000816271	0.00602972
pomk	34.3388	7.61517	2.27751	3.34364	0.000826855	0.0061044
arhgap21b	63.5454	5.83546	1.74761	3.33911	0.000840478	0.00620037
txndc11	42.7143	7.91994	2.37201	3.33891	0.000841079	0.00620037
slc39a13	168.21	-5.17459	1.54982	-3.33884	0.000841299	0.00620037
MB21D2	53.768	5.35363	1.60371	3.33828	0.000842984	0.00620923
vbp1	621.298	-1.73891	0.52112	-3.33688	0.000847246	0.00623705
nemp2	158.029	4.56275	1.36773	3.33599	0.000849948	0.00625336
haus6	50.6053	6.49467	1.94801	3.334	0.000856054	0.00629469
zgc:158376	57.0965	6.3669	1.91027	3.33298	0.000859217	0.00631433
ufsp2	46.9534	6.96416	2.08992	3.33226	0.000861427	0.00632697
iqsec2a	86.5767	-9.65942	2.90076	-3.32997	0.000868558	0.0063757
trim35-10	225.11	-4.08889	1.2283	-3.3289	0.000871891	0.00639652
LO018564.1	1457.68	1.32356	0.397747	3.32765	0.000875814	0.00642164
si:dkey-30k6.5	56.9851	6.51284	1.9578	3.32661	0.00087908	0.00644191
echs1	203.672	-2.48832	0.748947	-3.32242	0.000892389	0.00653572
fancc	34.5089	8.04208	2.42109	3.32167	0.000894789	0.00654957
si:dkey-97a13.6	496.171	-2.06303	0.62116	-3.32126	0.00089613	0.00655222
si:ch73-343l4.2	31.1615	-8.27273	2.49085	-3.32124	0.000896169	0.00655222
ahnak	1050.35	-2.81974	0.84919	-3.3205	0.000898567	0.00656602
stimate	191.832	4.44133	1.33804	3.31929	0.00090248	0.00658742
si:ch211-155o21.3	43.2473	8.37732	2.52384	3.31927	0.00090252	0.00658742
drp2	134.9	5.08058	1.53123	3.31796	0.000906775	0.00661473
plekho2	7680.63	1.54756	0.466497	3.3174	0.0009086	0.00662224
psen1	103.545	3.83226	1.15523	3.31733	0.000908833	0.00662224
ing3	647.103	-2.26274	0.682145	-3.31709	0.000909601	0.00662407
cplane2	32.1742	7.6109	2.29599	3.31487	0.000916868	0.00667322
znf45l	37.673	7.2582	2.19267	3.31021	0.000932252	0.00678136
sdf2l1	79.082	6.86847	2.07636	3.30794	0.000939847	0.00683274
rpp38	45.4319	7.02832	2.12497	3.3075	0.000941337	0.00683971
si:dkeyp-26a9.2	33.2346	7.69671	2.32731	3.30713	0.000942572	0.00684482
serpine1	112.858	-9.49014	2.8703	-3.30632	0.000945285	0.00686065
b3galt4	280.285	3.20186	0.968473	3.30609	0.000946085	0.00686259
zgc:112083	53.0621	6.75127	2.04322	3.30423	0.000952388	0.00690441
si:dkey-210j14.5	51.1278	7.20978	2.18244	3.30354	0.000954737	0.00691754
cacna1aa	525.978	1.85941	0.562959	3.30291	0.000956857	0.006929
smpdl3a	288.323	-2.78717	0.843935	-3.30258	0.000957987	0.00693328
kctd12.1	41.9289	7.8913	2.38966	3.30227	0.000959052	0.00693709
ntmt1	68.705	6.15009	1.86303	3.30112	0.000962981	0.00696159
ttll12	1035.61	3.23041	0.979136	3.29925	0.000969452	0.00700444
vat1	3331.68	-3.24878	0.985049	-3.29809	0.000973463	0.00702947
smc6	1216.48	1.74935	0.530535	3.29733	0.000976087	0.00704447
dnase2b	858.517	-1.55575	0.472267	-3.29423	0.00098692	0.00711866
ppfibp1b	86.8669	-9.66463	2.93506	-3.29282	0.000991884	0.00715046
lypla1	40.4212	6.67984	2.02935	3.29162	0.000996125	0.00717701
SH2D3A	55.7404	8.78569	2.66982	3.29074	0.000999247	0.00719547
dnajb6a	610.721	-1.59369	0.484493	-3.2894	0.001004	0.00722566
si:ch211-195b15.8	45.9771	6.47346	1.96809	3.28921	0.0010047	0.00722664
aspscr1	66.2549	6.49499	1.97538	3.28797	0.00100913	0.00725443
zc3h10	104.131	5.16552	1.57125	3.28752	0.00101073	0.00726193
ctdnep1b	534.061	2.50043	0.76077	3.28671	0.00101366	0.00727886
sema4c	89.3082	9.46571	2.88025	3.28642	0.0010147	0.0072823
gipc1	128.066	-2.99269	0.910798	-3.28579	0.00101698	0.00729457
ric8b	172.476	4.72964	1.43962	3.28533	0.00101862	0.00730229
sh3gl3a	1796.09	-1.24986	0.380503	-3.28477	0.00102067	0.00731293
jade3	171.278	3.7631	1.14657	3.28206	0.00103053	0.00737946
b4galt6	947.023	2.35202	0.716868	3.28097	0.00103449	0.0074037
si:ch211-284e13.6	61.4613	8.90576	2.71769	3.27695	0.00104934	0.00750575
arhgap35b	34.2718	7.56721	2.31016	3.27563	0.00105428	0.0075369
CABZ01111454.1	56.7651	5.26041	1.60627	3.27493	0.00105689	0.00755137
trappc6bl	56.0781	6.50886	1.98779	3.27442	0.00105879	0.00756077
qsox2	40.7746	7.12874	2.17744	3.2739	0.00106073	0.00757039
tnc	173.289	-4.96303	1.51605	-3.27366	0.00106165	0.00757282
foxg1c	30.0509	-7.18181	2.19684	-3.26916	0.00107867	0.00768997
eif2s2	866.072	-1.6431	0.502798	-3.2679	0.00108347	0.00771989
CT583642.1	51.8811	-8.18383	2.50455	-3.26758	0.00108471	0.00772445
meis1b	51.5497	-9.73893	2.98068	-3.26735	0.00108558	0.00772634
rnf165b	53.6256	6.60248	2.02116	3.26668	0.00108816	0.00774044
pknox1.1	175.051	4.08802	1.25168	3.26602	0.0010907	0.00775424
LO018260.1	49.1997	6.46199	1.9789	3.26544	0.00109294	0.00776221
cers2b	1345.39	-1.82839	0.559926	-3.26542	0.00109303	0.00776221
tbcelb	75.2642	5.38429	1.64934	3.26451	0.00109655	0.00778289
si:ch211-222l21.1	342.133	2.96443	0.908144	3.26427	0.00109747	0.00778516
DXO	55.7799	6.70921	2.05588	3.26343	0.00110073	0.00780397
CABZ01090144.1	34.876	7.52743	2.30748	3.26219	0.00110557	0.00783396
b3gat3	37.4003	7.16967	2.19802	3.26188	0.00110674	0.00783795
arpp21	268.419	-2.53612	0.777626	-3.26136	0.0011088	0.00784193
laptm4b	305.806	-3.50711	1.07536	-3.26133	0.0011089	0.00784193
med8	58.1985	6.47836	1.98645	3.26127	0.00110913	0.00784193
amn1	41.7154	7.17124	2.19967	3.26015	0.00111354	0.00786875
rbp5	45.9938	6.52409	2.00132	3.25989	0.00111456	0.00787162
si:ch73-380l3.2__1	131.457	-9.36111	2.87185	-3.25961	0.00111566	0.00787512
gpd1c	37.6019	7.3014	2.24119	3.25782	0.00112272	0.00792057
nck1b	462.947	-1.6341	0.502122	-3.25439	0.00113635	0.00801233
fam217b	32.1715	7.48427	2.29998	3.25406	0.00113767	0.00801726
nudt4b	30.5305	7.82974	2.40727	3.25253	0.00114381	0.00805612
mea1	64.5814	4.81184	1.47966	3.25199	0.00114598	0.00806701
gpam	2223.47	1.97735	0.608326	3.25048	0.00115209	0.00810556
TMEM196 (1 of many)	1186.09	1.9028	0.585565	3.24951	0.00115605	0.00811948
si:ch211-191i18.2	132.004	-6.75864	2.07995	-3.24942	0.00115641	0.00811948
rab40c	182.411	3.3851	1.04176	3.24939	0.00115651	0.00811948
foxo4	1246.15	-1.45942	0.449139	-3.24937	0.00115659	0.00811948
wdfy4	6063.41	1.10331	0.339574	3.24911	0.00115768	0.00812268
ripk4	56.3906	8.8024	2.71036	3.24768	0.00116349	0.008159
si:ch211-165i18.2	145.653	-8.47528	2.61097	-3.24603	0.00117026	0.00819867
adgrb3	33.4101	-8.97375	2.76457	-3.24599	0.00117043	0.00819867
esrp2	37.5366	7.53567	2.3217	3.24576	0.00117139	0.00819867
slc39a9	195.4	2.65676	0.818551	3.24568	0.00117169	0.00819867
trappc13	161.063	3.16665	0.975784	3.24524	0.00117353	0.00820707
tprkb	35.8944	7.88721	2.43278	3.24205	0.00118672	0.00829476
si:ch73-314g15.3	42.0139	7.05451	2.17696	3.24053	0.00119308	0.00833469
plxna1a	659.418	4.82117	1.48818	3.23965	0.00119678	0.00835603
si:ch211-161m3.6	33.1022	7.61939	2.35214	3.23934	0.00119806	0.00835793
nxph2a	673.202	2.32662	0.718254	3.23927	0.00119835	0.00835793
nfkbiaa	3085.38	-1.39677	0.431527	-3.2368	0.00120878	0.0084261
adprh	59.5666	-5.76984	1.78282	-3.23636	0.00121064	0.00843448
poc5	51.5211	6.77385	2.09365	3.23543	0.0012146	0.00845754
abca12	273.08	-2.42385	0.749458	-3.23413	0.00122013	0.00849139
parp11	510.04	-3.10927	0.961523	-3.23369	0.00122201	0.00849991
BX470259.2	39.3333	7.64818	2.3657	3.23295	0.00122518	0.00851727
CABZ01074304.1	32.6276	7.35212	2.27422	3.2328	0.00122583	0.00851727
dnajc17	34.1303	7.71578	2.38714	3.23223	0.00122828	0.00852966
zgc:165515	38.1898	7.35353	2.27536	3.2318	0.00123011	0.00853779
rnd3a	74.2169	-9.65014	2.98636	-3.2314	0.00123185	0.00854525
lrrc18a	29.6734	7.56729	2.342	3.23112	0.00123304	0.00854891
hdac12	45.459	6.48647	2.00792	3.23044	0.001236	0.00856478
fgd5b	60.9064	6.5745	2.03574	3.22953	0.00123993	0.0085874
pigt	235.327	4.53064	1.40338	3.22839	0.0012449	0.0086172
cyth4a	1523.93	4.89347	1.51596	3.22797	0.00124673	0.00862526
sumo1	103.182	3.61743	1.12077	3.22763	0.0012482	0.00862634
dennd4a	2014.34	-2.45883	0.761807	-3.22762	0.00124823	0.00862634
cecr2	493.001	1.91985	0.594982	3.22674	0.00125208	0.00864832
xrcc3	31.0517	7.51907	2.33059	3.22625	0.00125423	0.00865847
zbtb42	34.1515	7.98087	2.4762	3.22303	0.00126844	0.00875014
ca12	40.745	8.3198	2.58144	3.22293	0.00126887	0.00875014
BX537291.1	86.1534	-5.40675	1.67797	-3.2222	0.00127209	0.00876767
tomm20a__2	162.936	-5.20416	1.61518	-3.22203	0.00127287	0.00876838
zgc:77158	51.7877	6.64278	2.06241	3.22089	0.00127793	0.00879825
zgc:171759__5	134.799	-3.91301	1.21494	-3.22075	0.00127858	0.00879825
si:ch211-207i20.3	45.4065	7.36876	2.28832	3.22017	0.00128116	0.00881131
itgav	3066.32	-2.97122	0.922818	-3.21972	0.00128316	0.00881655
inppl1b	550.498	4.54712	1.41229	3.21968	0.00128334	0.00881655
ube2g1a	239.726	2.31183	0.718064	3.21954	0.00128398	0.00881655
man1b1b	807.943	-1.71877	0.533966	-3.21888	0.00128694	0.00883215
ankrd16	31.4754	7.56145	2.34966	3.2181	0.00129043	0.00885145
dock6	1550.09	1.31331	0.408273	3.21673	0.00129658	0.00888588
pik3c2a	2291.96	1.15587	0.359337	3.21668	0.00129684	0.00888588
nudt19	40.0743	7.03646	2.1878	3.21623	0.00129887	0.00889067
si:ch73-236c18.2__1	55.644	7.32358	2.27708	3.21622	0.00129892	0.00889067
ccpg1	45.7535	6.38857	1.98671	3.21565	0.00130149	0.00890357
CABZ01111496.1	36.8896	7.3333	2.28086	3.21515	0.00130376	0.00891433
CABZ01043953.1	57.8032	-8.32753	2.59067	-3.21443	0.00130705	0.00893208
rsrc1	70.31	4.42214	1.37623	3.21321	0.00131258	0.00896432
si:ch211-246e12.3	490.495	2.06843	0.643751	3.21309	0.00131316	0.00896432
si:ch211-137a8.2	83.3729	-8.94411	2.78487	-3.21168	0.00131963	0.00900181
nansa	49.0469	6.2243	1.93808	3.21158	0.00132005	0.00900181
SLC45A4 (1 of many)	95.6299	-6.49539	2.02263	-3.21136	0.00132106	0.00900395
prf1.5	27.7379	7.62088	2.37333	3.21105	0.00132252	0.00900911
arhgef37	636.599	2.91908	0.909481	3.20961	0.00132914	0.00904938
atp2b1b	88.7666	-9.23548	2.87758	-3.20946	0.00132986	0.00904949
b4galt1l	355.515	1.96895	0.613593	3.20889	0.0013325	0.00906271
si:dkey-253d23.4	1626.88	3.30441	1.03008	3.20791	0.00133705	0.0090888
mhc1laa	54.3134	5.57378	1.73769	3.20758	0.00133855	0.00909419
FLNB	48.8411	7.07903	2.2099	3.20332	0.00135853	0.00922512
rpl9	3194.65	-1.80524	0.563721	-3.20236	0.00136307	0.00925106
dnm1l	188.016	2.78712	0.870579	3.20146	0.00136735	0.00927518
pcmtl	41.4415	7.58928	2.37156	3.20012	0.00137372	0.00931353
neil1	96.7904	7.79786	2.43729	3.19939	0.00137717	0.00932803
tbc1d20	52.0998	7.59292	2.37326	3.19936	0.00137731	0.00932803
ucp2	1335.56	-2.21296	0.691807	-3.19881	0.00137997	0.00934112
grin2aa	29.7179	7.7902	2.43587	3.19811	0.0013833	0.00935874
zgc:158689	46.6084	6.85671	2.1446	3.1972	0.00138769	0.00938348
txndc15	56.7897	6.26734	1.96083	3.19627	0.00139217	0.00940514
slc25a22a	434.421	-1.67234	0.523223	-3.19623	0.00139235	0.00940514
zdhhc21	49.2266	6.73455	2.10809	3.19463	0.00140012	0.00945265
emc6	41.6747	6.94334	2.17366	3.19431	0.00140168	0.0094582
itpka	771.379	2.27114	0.711113	3.19378	0.00140421	0.00947034
vclb	42.8655	6.76086	2.11809	3.19196	0.00141312	0.00952539
igsf8	29.4664	7.70499	2.41498	3.1905	0.00142026	0.00956852
bin1b	2096.76	1.76831	0.554318	3.19006	0.00142243	0.00957813
yme1l1b	310.24	2.22495	0.6975	3.18989	0.00142326	0.0095787
fam49ba	4053.97	1.82392	0.57197	3.18884	0.00142846	0.00960869
srsf9	79.5668	5.7459	1.80255	3.18766	0.00143429	0.00964286
fam135a	1069.98	2.39864	0.752583	3.18721	0.00143652	0.00965283
dnajc3a	123.567	4.22795	1.32665	3.18693	0.00143791	0.00965711
sash1b	55.115	8.74968	2.74562	3.18678	0.00143868	0.00965727
aldh16a1	169.793	-5.62171	1.76449	-3.18603	0.00144241	0.00967724
DNAH10	42.4326	8.17422	2.56603	3.18556	0.00144476	0.00968706
ftr06__2	51.6929	8.66401	2.71989	3.18543	0.00144538	0.00968706
sh2b3	654.146	-2.00921	0.630899	-3.18468	0.00144915	0.00970725
zgc:173552__3	55.955	5.30996	1.66751	3.18436	0.00145076	0.00970945
ten1	34.3637	7.52874	2.36432	3.18431	0.00145098	0.00970945
ccdc151	79.6226	4.92026	1.54541	3.18379	0.00145359	0.00972183
zgc:92380	55.0035	6.16694	1.93829	3.18163	0.00146448	0.00978429
rnaset2	591.522	-1.86918	0.5875	-3.18158	0.00146473	0.00978429
si:dkey-238m4.4	55.9454	8.76884	2.75629	3.1814	0.00146568	0.00978429
fkbp1ab	87.3709	-6.56105	2.06236	-3.18134	0.00146597	0.00978429
rmi1	30.4809	7.44064	2.3397	3.18017	0.00147188	0.00981862
polr2m	70.4965	5.50921	1.73296	3.17908	0.00147742	0.00985045
phf21aa	52.2815	8.69342	2.73484	3.17876	0.00147905	0.00985622
si:dkey-185p13.1	31.3799	7.86017	2.47527	3.17547	0.00149592	0.00996011
bbs2	37.9473	7.50975	2.36496	3.17542	0.00149618	0.00996011
pigbos1	36.4226	7.13162	2.24614	3.17505	0.00149808	0.00996759
sap130a	329.375	2.17271	0.684375	3.17474	0.0014997	0.00997318
fam192a	78.7667	4.15359	1.30906	3.17296	0.00150893	0.0100294
pttg1ipa	428.574	2.2591	0.712071	3.17258	0.00151092	0.0100375
tmsb1	94.7943	-6.50198	2.05003	-3.17164	0.0015158	0.0100646
sema6a	131.59	6.8261	2.15313	3.17032	0.0015227	0.0101053
mafa	1040.71	-3.10385	0.979544	-3.16867	0.00153138	0.0101576
GNAZ	617.1	1.85623	0.58585	3.16844	0.00153257	0.0101603
carmil2	166.773	5.11562	1.61476	3.16804	0.00153468	0.0101658
ssx2ipa	46.6432	8.13762	2.5687	3.16799	0.00153499	0.0101658
c1d	52.6901	-6.82131	2.15351	-3.16753	0.00153739	0.0101765
wdr61	43.291	7.02482	2.21808	3.16707	0.00153984	0.0101822
pde8b	119.345	-4.84487	1.52978	-3.16704	0.00153997	0.0101822
ppcs	35.2209	7.17552	2.26577	3.16692	0.00154063	0.0101822
keap1b	134.1	4.7412	1.49718	3.16675	0.0015415	0.0101828
cox14	45.325	6.68312	2.11103	3.16582	0.00154649	0.0102105
FO905040.1	38.1272	7.25846	2.29329	3.16509	0.00155033	0.0102306
ftr14	86.8224	-6.97019	2.20293	-3.16405	0.00155589	0.0102576
aldh4a1	144.364	2.95135	0.932783	3.16403	0.00155602	0.0102576
rab3ip	30.8969	7.56519	2.39157	3.16328	0.00156005	0.0102789
snx29	2315.41	1.75798	0.556529	3.15883	0.00158405	0.0104275
kat6b	4071.44	1.88594	0.597051	3.15876	0.00158441	0.0104275
st7__1	46.1537	7.43359	2.35341	3.15865	0.00158504	0.0104275
crybg1b	53.3022	-9.75508	3.08871	-3.15831	0.00158688	0.0104343
aamdc	30.6542	-6.84141	2.16644	-3.1579	0.00158912	0.0104399
rnf144b	239.382	-4.25631	1.34785	-3.15785	0.00158936	0.0104399
acp1	90.4712	-3.10472	0.983532	-3.1567	0.00159566	0.010476
paqr4a	255.097	-2.87097	0.909959	-3.15506	0.00160466	0.0105297
cyfip2	72.8153	5.38466	1.70711	3.15425	0.0016091	0.0105535
BX530018.2	35.4699	7.42058	2.35335	3.15319	0.00161497	0.0105865
kif21a	33.3212	7.57809	2.404	3.15228	0.00162001	0.0106101
coil	103.54	4.65086	1.47541	3.15224	0.00162021	0.0106101
lcp1	7446.7	1.62228	0.514673	3.15206	0.00162124	0.0106114
si:ch211-79k12.1	1400.61	1.58423	0.50272	3.15132	0.00162534	0.0106329
tmem70	41.4288	7.21788	2.29079	3.15082	0.0016281	0.0106456
tmc8	636.303	1.55141	0.492411	3.15065	0.0016291	0.0106467
tesk2	692.75	1.86072	0.590749	3.14977	0.001634	0.0106643
mmp2	32.9398	-7.26145	2.30542	-3.14972	0.00163425	0.0106643
kcnk4a	56.0594	8.79387	2.79196	3.14972	0.00163429	0.0106643
srd5a3	37.6618	7.4742	2.3731	3.14956	0.00163518	0.0106647
cox11	57.6403	7.94697	2.52528	3.14697	0.00164972	0.0107541
BX276105.1	34.7535	7.10855	2.2593	3.14635	0.0016532	0.0107714
ccser2a	738.758	2.53158	0.804831	3.14548	0.00165814	0.010798
ugt2a5	31.4204	7.59212	2.41393	3.14513	0.00166016	0.0108055
si:dkey-30c15.10	33.4019	7.54425	2.39882	3.14498	0.00166097	0.0108055
zgc:66443	53.2606	7.23298	2.30146	3.14278	0.00167351	0.0108793
aptx	48.6075	6.52131	2.07507	3.1427	0.001674	0.0108793
mcoln2	235.766	4.50146	1.43243	3.14253	0.00167496	0.01088
fem1c	115.015	3.42172	1.08927	3.14128	0.00168211	0.010921
CU855885.1	33.7521	7.86425	2.50406	3.14061	0.00168599	0.0109406
st3gal3a	2034.68	1.53057	0.487592	3.13904	0.00169502	0.0109937
si:ch211-275j6.5	31.4027	7.34008	2.33854	3.13875	0.00169669	0.010999
rpl36	1858.15	-1.59822	0.509269	-3.13826	0.00169955	0.011012
si:dkey-4c23.5	1516.36	-1.34105	0.427513	-3.13686	0.0017077	0.0110593
ndufs6	88.1668	4.70905	1.50146	3.13631	0.00171086	0.0110741
bcl7ba	112.949	-3.81947	1.218	-3.13586	0.00171349	0.0110856
tgm1l1	67.0293	-9.49408	3.02866	-3.13475	0.00172004	0.0111223
hck	6238.23	1.3587	0.433613	3.13345	0.00172766	0.0111609
orc5	40.7301	6.43346	2.05317	3.13344	0.00172773	0.0111609
mrpl48	33.6658	7.1695	2.28817	3.13329	0.0017286	0.0111609
rai14	582.507	4.70385	1.50235	3.131	0.0017421	0.0112424
ints5	37.9839	7.26696	2.3214	3.13043	0.00174553	0.0112554
mmd	474.323	-2.70976	0.865667	-3.13025	0.00174656	0.0112554
dhx30	55.9172	6.67667	2.13297	3.13022	0.00174674	0.0112554
cep104	199.241	2.22431	0.71074	3.12956	0.00175067	0.0112751
ptger2b	57.89	8.80713	2.81493	3.12872	0.00175567	0.0113016
[truncated: 11,664 more rows]

## Sheet: VennDia_up_lists
overlap_up_resWZ	unique_Wup_resWZ	unique_Zup_resWZ
abi3a	abca12	ago3b
acot11b	abca2	atp2b1a
actn1	abch1	batf3
adgrl1a	actb1	CABZ01088367.1
afap1l2	actn4	CABZ01099833.1
aif1l	adgre9	cbx7a
ank2b	adgrg1__1	ccl19a.2
anxa11b	adgrg1__2	ccl35.1
arhgap12b	agpat3	ccni
arhgap33	akt3a	ccr2__2
arhgap4b	arhgap1	ccr9a
arhgef15	arhgap17b	cd82a
arhgef3	arhgap27l	cd82b
atp1b3b	arhgap29b	cish
b3gnt3.2	arid5a	cnot1
bcl2l10	arl5c	cox8b
btbd11b	arl6ip5b	CR925756.1
c1qtnf5	arpc5b	crtc2
cadm1a	arvcfb	csrnp1a
cadm2a	asap2b	CT573342.2
cadm4	asmtl	dnajc5ga
calm1b	atp10d	enc1
ccl19a.1	atp2a3	epb41l3a
ccl35.2	atrn	fam107b
ccser2a	b4galnt1a	fam129bb
cd209	bahcc1b	fem1c
cdh2	bcor	fus
cdk6	bik	gng2
cfbl	birc7	gpr137ba
chl1a	bphl	gramd1a
CMKLR1 (1 of many)__1	bpifcl	gramd2aa
CMKLR1 (1 of many)__2	btk	grasp
cnn3a	BX323022.1	hcfc1b
crybg1a	BX897691.1	ifi46
ctnnd2a	cables2b	il15l
cttnbp2nlb	CABZ01068244.1	iqcc
def6a	CABZ01102038.1	irf2bpl
dennd2db	CABZ01111959.1	kif1b
desi2	CABZ01114581.1	lbh
dgkg	camk1db	lin7b
dia1b	camkk1a	lpar2a
ehbp1l1b	card11	mcmbp
epdl1	ccl38.1	mettl4
erbin	ccser1	ncaldb
fam49ba	cdc42l	nme5
fes	celf2	nod2
fgf12a	cep170b	nrxn1a
flt3	chst7	osbpl3a
fmnl1a	cmtm7	osbpl3b
fnbp1l	cnot6a	pdlim1
frmd4bb	coro1b	pef1
gpatch8	CR385050.1	plekhg2
gpr37a	CR847844.1	ppp1r26
gria4b	crim1	ptmaa
hcar1-4	CU984600.1	ranbp3a
hcst	CU984600.3	raraa
hepacam2	cyba	rbm5
hrasb	cyth4a	rfc2
id2a	cyth4b	rpl12
il12ba	dapp1	rpl23
il12rb2l	dennd1b	rplp1
il21r.1	dgkza	rps11
iqsec1b	dock10	rps12
irf4a	dock6	rps27.1
kcnk18	dok2	runx3
kdm2ba	DTX4	ryr3
lpar6b	dub	sap130b
map4k6	ece2b	sgce
mbnl3	elmo3	si:ch1073-214b20.2
mfsd6b	eml3	si:ch211-150o23.3
mical3a__2	EML5	si:ch211-253b8.2
mon1ba	epn1	si:ch211-9d9.7
msi1	ero1b	si:ch73-368j24.17
mylipb	esyt1b	si:dkey-112e7.2
myt1b	ezh1	si:dkey-179k24.5
NA	mpeg1.1	NA
NA	mrtfaa	NA
NA	msi2a	NA
NA	msi2b	NA
NA	mtmr12	NA
NA	mtmr1a	NA
NA	mtus1a	NA
NA	mybpha	NA
NA	myh11a	NA
NA	MYO1G	NA
NA	myo9b	NA
NA	ncam1a	NA
NA	nck1a	NA
NA	net1	NA
NA	nrd1a	NA
NA	nsl1	NA
NA	nxph2a	NA
NA	oga	NA
NA	orai1a	NA
NA	OSBPL8	NA
NA	p2rx7	NA
NA	p2ry11	NA
NA	pacs1a	NA
NA	parp4	NA
NA	pcdh7b	NA
NA	PDE3B	NA
NA	pfkfb3	NA
NA	pfn1	NA
NA	pik3cd	NA
NA	plekhj1	NA
NA	plekho2	NA
NA	plk3	NA
NA	plxnb1b	NA
NA	ppp1r14bb	NA
NA	prkar2aa	NA
NA	prkcaa	NA
NA	prkcba	NA
NA	prkcha	NA
NA	prr14	NA
NA	pstpip2	NA
NA	ptprc	NA
NA	ptprea	NA
NA	ptprja	NA
NA	ptpro__2	NA
NA	pttg1ipa	NA
NA	rab5aa	NA
NA	rabgap1l	NA
NA	rapgef6	NA
NA	rasal3	NA
NA	rasgrp3	NA
NA	rbm47	NA
NA	rgl2	NA
NA	roraa	NA
NA	rps6ka5	NA
NA	s1pr2	NA
NA	sash1a	NA
NA	scml2	NA
NA	scrib	NA
NA	sema4ab	NA
NA	sh3kbp1	NA
NA	si:busm1-104n07.3	NA
NA	si:busm1-57f23.1	NA
NA	si:ch211-114l13.12	NA
NA	si:ch211-119e14.1	NA
NA	si:ch211-11p18.6__1	NA
NA	si:ch211-153b23.7	NA
NA	si:ch211-157p22.10	NA
NA	si:ch211-165f21.2__1	NA
NA	si:ch211-165f21.2__2	NA
NA	si:ch211-203d1.3	NA
NA	si:ch211-213a13.2__1	NA
NA	si:ch211-213a13.5	NA
NA	si:ch211-220f16.2	NA
NA	si:ch211-226m16.2	NA
NA	si:ch211-234h8.7	NA
NA	si:ch211-250k18.7	NA
NA	si:ch211-269k10.4	NA
NA	si:ch211-28p3.3	NA
NA	si:ch211-51h4.2	NA
NA	si:ch211-79k12.1	NA
NA	si:ch211-9d9.8__1	NA
NA	si:ch73-177h5.2	NA
NA	si:ch73-226l13.2	NA
NA	si:ch73-27e22.6	NA
NA	si:ch73-281k2.5	NA
NA	si:ch73-95l15.5	NA
NA	si:dkey-102c8.2__1	NA
NA	si:dkey-102c8.3	NA
NA	si:dkey-118j18.2	NA
NA	si:dkey-13m1.2	NA
NA	si:dkey-1c7.1	NA
NA	si:dkey-22i16.9	NA
NA	si:dkey-22o12.2	NA
NA	si:dkey-240h12.4	NA
NA	si:dkey-253i9.4	NA
NA	si:dkey-33c9.6	NA
NA	si:dkey-33i11.9	NA
NA	si:dkey-4c23.3	NA
NA	si:dkey-53k12.1	NA
NA	si:dkey-85k7.12	NA
NA	si:dkey-92f12.2	NA
NA	si:dkeyp-19e1.3	NA
NA	si:dkeyp-28d2.4	NA
NA	si:dkeyp-94g1.1	NA
NA	sik2b	NA
NA	skap1	NA
NA	sla2	NA
NA	slc15a4	NA
NA	slc25a23a	NA
NA	slc25a39	NA
NA	slc35g2a	NA
NA	slc4a11	NA
NA	slc8a4b	NA
NA	slc9a3r1a	NA
NA	smc6	NA
NA	smchd1	NA
NA	smcr8b	NA
NA	sntb1	NA
NA	spag1a	NA
NA	specc1	NA
NA	ssbp3b	NA
NA	st3gal3a	NA
NA	stambpl1	NA
NA	tanc2a	NA
NA	tbc1d10b	NA
NA	tbc1d2b	NA
NA	tdrd12	NA
NA	tep1	NA
NA	tescb	NA
NA	tgfb1b	NA
NA	tle3a	NA
NA	tlr2	NA
NA	tlr8a	NA
NA	tmem131l	NA
NA	TOM1L2	NA
NA	top1l	NA
NA	tpcn1	NA
NA	tpm1	NA
NA	tpm3	NA
NA	trim33l	NA
NA	ttc3	NA
NA	ttll12	NA
NA	uacaa	NA
NA	utrn	NA
NA	vps54	NA
NA	wdfy4	NA
NA	wdr41	NA
NA	xcr1a.1	NA
NA	yrk	NA
NA	zgc:152863	NA
NA	zgc:154055	NA
NA	zgc:158564	NA
NA	zgc:77650	NA
NA	zmp:0000001139	NA
nav3	fam208aa	si:dkey-187e18.1
neurl1aa	fcer1g	si:dkey-197c15.6
nme2b.2	fgd4b	si:dkey-23a13.11
pard6a	fnbp1b__2	si:dkey-244a7.1
parm1	foxj3	si:dkey-253d23.3
pde4ba	fut9b	si:dkey-262k9.4
pigrl4.2	fybb	si:dkey-3k24.5
pik3ap1	galnt1	si:dkey-56e3.3
plpp3	gapvd1	si:dkeyp-50d11.2
plxna3	gnaia	slc24a4a
plxnc1	GNAZ	slc26a11
ptpn18	gpam	slc43a1a
qrsl1	gramd4b	slc7a10a
rac2	gsdmea	socs1a
rap1gap2a	gse1	sptbn1
rgs13	hck	SRCIN1
ryr1b	hcls1	syngr1b
s1pr1	hipk3b	tagln2
sb:cb649	huwe1	thoc7
scinlb	il1fma	tmc6b
sema6e	il22	tmsb4x
2012-09-01	inpp4aa	tnfb
setx	inpp4ab	trpm2__2
si:ch211-212k18.5	ipcef1	tspan2a
si:ch211-214c7.4	irak3	ttc32
si:ch211-215e19.6	irf2	ttll4
si:ch211-222l21.1	itgb7	ubp1
si:ch211-59d17.3	itpk1b	wasb
si:dkey-111e8.5	junba	zgc:113229
si:dkey-216e24.9	kat6b	zgc:153284
si:dkey-24p1.1	kazald3	zgc:162939
si:dkey-262k9.2	kcnk1b	zgc:174904
si:dkey-9c18.3	kcnq5b	zmp:0000000924
si:dkeyp-117b11.1	kif21b	znf507
siglec15l	klf11a	znf513a
slc12a7b	lcp1	znf576.1
spaca4l	LO018106.1	NA
spock3	LO018176.1	NA
stx3a	LO018564.1	NA
sult5a1	LO018597.2	NA
swap70a	lpcat1	NA
syngr3b	lrch2	NA
tent5bb	lrrk1	NA
tiam1a	lyst	NA
tmem178	mafgb	NA
trib2	man1a2	NA
trim3b	man2a1	NA
ttn.2	mao	NA
tyrobp	map4k3a	NA
wipf1a	map4k5	NA
zgc:101810	mapk8ip3	NA
zgc:153733	mark2b	NA
zgc:171686	mbnl1	NA
znf366	mboat2b	NA
znf385a	micall1b.2	NA

## Sheet: VennDia_down_lists
overlap_down_resWZ	unique_Wdown_resWZ	unique_Zdown_resWZ
acsl4b	aatka	abcb7
adcy7	abca1b	abcc5
adgrd2	abcc12	abcf3
akt2l	abhd12	agk
aldh8a1	abi1b	ampd2b
alox5ap	abi2b	ano5b
apoc1	acp2	arhgap18
apoeb	acvrl1	arpp21
arhgap27	adam9	arrb2b
arhgef16	adap2	asb3
atp1b1a	adh5	atad1b
brinp3b	agpat4	atf3
bzw1b	ahr2	atp1a1a.1
CABZ01041494.1	ak3	b3gnt2l
CABZ01088484.1	aldoaa	bcs1l
cabz01093075.1	ampd3b	bnipl
camkvl	apbb1ip	c7b
ccl34b.1	appb	CABZ01077218.1
ccr12a	arhgap10	CABZ01090890.1
cd22	arhgap12a	ccdc87
cd2ap	arhgap15	cd63
cebpb	arhgef10	CDK18
clic5b	arhgef7b	cds1
cmklr1	arrdc2	ch25h
CR381673.2	atp13a2	cited4b
ctsba	atp13a3	ckbb
ctsz	atp2b1b	clic2
cx32.2	atp6v1aa	cntrl
dok4	atp6v1ab	col4a3bpb
eepd1	atp6v1ba	cox16
egr1	atp7a	cpt1b
egr2a	b4galt1	crym
egr2b	bcl7ba	CT583642.1
egr3	bin2b	ctsh
entpd1	bnip4	CU571081.1
fabp11a	BX120005.1	cux1b
fam198b	BX539336.1	ddit3
fbxo41	c1qa	ddt
fcer1gl	c1qb	ddx5
fhl3a	c1qc	decr1
FO907110.1	CABZ01019904.1	dennd4a
fosl1a	CABZ01044156.1	dennd6aa
foxc1b	CABZ01054965.1	dia1a
g0s2	CABZ01061591.1	dusp2
glula	CABZ01066694.1	dusp5
gpc1b	CABZ01068358.1	ebna1bp2
grin3a	CABZ01076275.1	eif4a1a
helz2	CABZ01079192.1	elp5
higd1a	card9	enpp1
ier5l	cass4	esco2
igf1	cbfa2t3	etfdh
igf2b	ccdc57	f3b
itgae.1	ccl34a.3	fam49bb
klf12b	ccl34a.4	fosab
lgals3bpb	ccl34b.8	ftr52p
lgals9l1	ccr2__1	galk2
lgals9l3	cdc42se1	gk5
loxl3a	cdc42se2	glrx2
lta4h	cdkn1cb	gna12a
mafaa	cebpa	grna
MFAP4 (1 of many)__3	cfp	hmox1a
mhc1lia	CHST13	hsd17b14
mitfb	chst15	hsp70.3
MPRIP	cndp2	hspa5
ms4a17a.10__2	cobl	hspg2
mtss1la	col5a1	ier2a
mtus1b	crema	il15
nanos1	crip2	ino80e__1
nfil3-6	csf1ra	inpp4b
npnt	csf1rb	inpp5d
nt5e	csf2rb	ip6k2b
p2ry12	csf3r	irs1
pdgfba	CT030188.1	itgb2
peli1a	ctnna1	itgb7
phldb1b	ctnnb1	junbb
pld1b	ctsa	kalrnb
plin2	ctsc	klf2a
plxnd1	ctsd	l3mbtl2
ptges	ctsla	lcor
ptx4	CU571315.1	letmd1
qki2	cx43	lrpprc
rac1a	cxcr3.2	luzp1
rassf2a	cxcr4b	mcl1a
rbms3	cyp2k8	memo1
rgs19	cyth3a	METTL18
SAMD8	dapk1	miga1
sb:cb1058	ddr2a	mrpl43
sb:cb81	dennd5b	mrps9
sc:d156	deptor	mtfmt
scarf1	dhrs9	myd88
scpep1	dicp1.1__1	nabp1a
sdc4	dicp3.1	NHLRC3
serpine1	dkk3b	nudt9
sgk2b	dock4b	olah
si:cabz01074946.1	dock7	pald1a
si:ch211-106a19.1	dpp7	pard6gb
si:ch211-158d24.4	dram1	parp11
si:ch211-186j3.6	ebf3b	pdcd2l
si:ch211-209f23.6	ece1	pecam1
si:ch211-266g18.9	eef1a1l1	phf20l1
si:ch211-74m13.3	eef1b2	pigl
si:ch211-85n16.4	eef2b	pign
si:ch73-52p7.1	ehbp1	pik3r6b
si:ch73-86n18.1	ehd4	plek
si:dkey-1h24.6	eif3f	plk2b
si:zfos-741a10.3	elovl1b	pnpo
slc15a2	entpd2a.1	pofut1
slc22a21	epb41l3b	ppfibp1b
slc24a3	ephx2	ppp1r15a
slc29a1b	esrra	ppp1r3b
slc4a4b	ets2	prelid3b
slco2b1	etv4	prkcsh
snrkb	evla	psap
snx33	exoc3l2b	ptbp1b
spns2	exoc6b	r3hcc1
spred2b	f13a1b	racgap1
stra6l	fam114a1	rapgef2
tbc1d16	fam126a	rbp2a
tgm2l	fam129ab	rdh12l
timp4.3	fam13a	recql
tmem63ba	fam43a	ripor1
trib3	FAM83G	ror2
trip10a	fgd6	rtcb
tspan36	fgl2a	rxrgb
tubb4b	fhod1	serpinb14
txnipa	fkbp1ab	serpine3
vmp1	fmo5	si:ch211-114l13.9
yes1	fndc3bb	si:ch211-137a8.2
zdhhc4	fosb	si:ch211-15d5.12
zeb2a	fosl2	si:ch211-181d7.3
zfp36l1b	foxp1a	si:ch211-210c8.6
zgc:101663	fthl27__1	si:ch211-214j8.12
zgc:112492	ftr14	si:ch73-252p3.1
zgc:77486__1	fuca2	si:dkey-111e8.1
NA	fxyd1	si:dkey-26c10.5
NA	fzd2	si:dkey-79d12.5
NA	gadd45ga	si:dkeyp-69e1.8
NA	git2b	sirt3
NA	glud1b	six5
NA	gng10	slc20a1b
NA	gnpda1	slc20a2
NA	gpat3	slc22a18
NA	gpc5a	slc25a22a
NA	gpcpd1	slc35f3a
NA	gpr132b	smfn
NA	grb10b	sorbs3
NA	grinab	sox4a__1
NA	grk6	spi1a
NA	gstp1	spns3
NA	h1f0	spry4
NA	hamp	st8sia4
NA	havcr1	stx6
NA	havcr2	tead3a
NA	hbegfb	tent5ab
NA	hdac9b	tlr1
NA	hdlbpa	tmem229b
NA	hecw2b	tmem237b
NA	her6	tob1a
NA	hhipl1	tor4aa
NA	hk2	tspy
NA	hmgb3b	ttc1
NA	hspb1	ubb
NA	id1	ube2d4
NA	ifngr1l	ubn2b
NA	igf1ra	ulk2
NA	igsf9ba	ulk4
NA	il10ra	usp20
NA	il1b	utp15
NA	il4r.1	vcam1b
NA	il4r.2	vps11
NA	il6r	vps53
NA	im:7160594	vps8
NA	inpp5b	xbp1
NA	iqgap2	xkr8.1
NA	itgb5	xpnpep3
NA	jun	yipf3
NA	kel	zc3h7ba
NA	krt8	zgc:101016
NA	lamb1a	zgc:110591
NA	lamp1a	zgc:153372
NA	laynb	zgc:153901
NA	lgmn	zgc:162193
NA	lifrb	zgc:171534
NA	lipg	zgc:193801
NA	lmnb1	zmym4
NA	lpar6a	znf740b
NA	lrmda	NA
NA	lrp1ab	NA
NA	lrp5	NA
NA	LRRC75A	NA
NA	ltb4r	NA
NA	lzts2a	NA
NA	mafa	NA
NA	mafba	NA
NA	mafbb	NA
NA	map1sa	NA
NA	mapk1	NA
NA	marco	NA
NA	mast1a	NA
NA	mboat2a	NA
NA	mcamb	NA
NA	mcf2l2	NA
NA	mertka	NA
NA	metap2a	NA
NA	mfap4	NA
NA	mfsd2ab	NA
NA	MGARP	NA
NA	mgat1b	NA
NA	mgst1.2	NA
NA	mhc1uba	NA
NA	mibp2	NA
NA	mical1	NA
NA	mitfa	NA
NA	mmd	NA
NA	mmd2a	NA
NA	mmp14b	NA
NA	mogat3b	NA
NA	mpeg1.2	NA
NA	mpp1	NA
NA	mpzl2b	NA
NA	mrc1b	NA
NA	ms4a17a.9	NA
NA	mtss1	NA
NA	mtss1lb	NA
NA	myh9a	NA
NA	nadka__1	NA
NA	naga	NA
NA	ncf2	NA
NA	ndrg1a	NA
NA	nedd8l	NA
NA	ngfrb	NA
NA	nitr10a	NA
NA	noc2l	NA
NA	NPC2 (1 of many)	NA
NA	nrp1a	NA
NA	nrp1b	NA
NA	nrros	NA
NA	ogdhb	NA
NA	ophn1	NA
NA	osbp	NA
NA	osbpl10b	NA
NA	paox1	NA
NA	paqr6	NA
NA	parp12a	NA
NA	pdgfd	NA
NA	pdgfrb	NA
NA	pdk2b	NA
NA	pepd	NA
NA	pgd	NA
NA	phactr4b	NA
NA	pkig	NA
NA	pla2r1	NA
NA	plbd1	NA
NA	plcd4b	NA
NA	plecb	NA
NA	plekhm2	NA
NA	plp2	NA
NA	plrdgb	NA
NA	plxnb1a	NA
NA	plxnb2b	NA
NA	pmaip1	NA
NA	pmepa1	NA
NA	pnp5a	NA
NA	porb	NA
NA	ppfibp1a	NA
NA	prkcab	NA
NA	prps1a	NA
NA	prr5a	NA
NA	ptpn21	NA
NA	rab7b	NA
NA	raph1a	NA
NA	rbck1	NA
NA	rbfox1l	NA
NA	reck	NA
NA	rgl1	NA
NA	rgs5b	NA
NA	rnaseka	NA
NA	rnf19a	NA
NA	rpl10	NA
NA	rpl12	NA
NA	rpl26__1	NA
NA	rpl4	NA
NA	rps10	NA
NA	rps15a	NA
NA	rps24	NA
NA	SCARF2	NA
NA	scinla	NA
NA	scn4bb	NA
NA	sdcbp2	NA
NA	sec61a1	NA
NA	selenon	NA
NA	selenop	NA
NA	sept9b	NA
NA	sgk1	NA
NA	sgk494a	NA
NA	sh2b3	NA
NA	sh3pxd2b	NA
NA	shc2	NA
NA	shmt1	NA
NA	si:ch1073-392o20.2	NA
NA	si:ch211-106h4.4	NA
NA	si:ch211-165i18.2	NA
NA	si:ch211-191i18.2	NA
NA	si:ch211-193e13.5	NA
NA	si:ch211-194m7.3	NA
NA	si:ch211-195b13.1	NA
NA	si:ch211-195b15.7	NA
NA	si:ch211-204c21.1__1	NA
NA	si:ch211-214p13.9	NA
NA	si:ch211-222k6.3	NA
NA	si:ch211-225b11.1	NA
NA	si:ch211-252f13.5	NA
NA	si:ch211-253b8.5	NA
NA	si:ch211-264f5.2	NA
NA	si:ch211-26b3.4	NA
NA	si:ch211-278p9.3	NA
NA	si:ch211-283g2.2__1	NA
NA	si:ch211-283g2.2__2	NA
NA	si:ch211-286b4.4	NA
NA	si:ch211-74f19.2	NA
NA	si:ch211-74m13.1	NA
NA	si:ch73-170d6.3	NA
NA	si:ch73-248e21.5	NA
NA	si:ch73-248e21.7	NA
NA	si:ch73-24k9.2	NA
NA	si:ch73-281f12.4	NA
NA	si:ch73-31d8.2	NA
NA	si:ch73-347e22.4	NA
NA	si:ch73-380l3.3	NA
NA	si:dkey-120c6.5	NA
NA	si:dkey-126g1.7	NA
NA	si:dkey-18a10.3	NA
NA	si:dkey-205h13.1	NA
NA	si:dkey-21a6.5	NA
NA	si:dkey-222f2.7	NA
NA	si:dkey-239i20.2	NA
NA	si:dkey-23k10.5	NA
NA	si:dkey-33i11.1	NA
NA	si:dkey-34e4.1	NA
NA	si:dkey-4c23.4	NA
NA	si:dkey-56f14.7	NA
NA	si:dkey-5n18.1	NA
NA	si:dkey-69o16.5	NA
NA	si:dkey-9i23.15	NA
NA	si:dkey-9k7.3	NA
NA	si:dkeyp-123h10.2	NA
NA	si:dkeyp-23e4.3	NA
NA	si:zfos-2326c3.2	NA
NA	SLA (1 of many)	NA
NA	slc16a10	NA
NA	slc16a1b	NA
NA	slc16a9a	NA
NA	slc1a3a	NA
NA	slc2a6	NA
NA	slc30a1a	NA
NA	slc31a1	NA
NA	slc36a1	NA
NA	slc3a2a	NA
NA	slc40a1	NA
NA	slc43a2b	NA
NA	slc45a4	NA
NA	slc4a2b	NA
NA	smad1	NA
NA	smox	NA
NA	smpdl3a	NA
NA	snphb	NA
NA	snx18a	NA
NA	snx5	NA
NA	spdl1	NA
NA	srgap3	NA
NA	ssh1a	NA
NA	stab1	NA
NA	stoml3b	NA
NA	sulf2b	NA
NA	swap70b	NA
NA	syngap1b	NA
NA	tcea3	NA
NA	tcf3b	NA
NA	tcima	NA
NA	tec	NA
NA	tent5ba	NA
NA	tfec	NA
NA	tgif1	NA
NA	tie1	NA
NA	timp2b	NA
NA	tlr22	NA
NA	tlr5a	NA
NA	tlr5b	NA
NA	TMCC1	NA
NA	tmem131	NA
NA	tmem176l.4	NA
NA	tmem206	NA
NA	tmsb1	NA
NA	tnfaip2b	NA
NA	tnfrsfa	NA
NA	tnfsf10l	NA
NA	tnfsf12	NA
NA	tnni4b.1	NA
NA	tpcn3	NA
NA	tpra1	NA
NA	tpte	NA
NA	trak1a	NA
NA	tram2	NA
NA	TSC22D3	NA
NA	tspan18a	NA
NA	tspo	NA
NA	ugp2b	NA
NA	ugt2a1	NA
NA	vaspb	NA
NA	vat1	NA
NA	washc4	NA
NA	wdfy2	NA
NA	wipf1b	NA
NA	zbtb46	NA
NA	zcchc14	NA
NA	zfhx4	NA
NA	zgc:110239	NA
NA	zgc:153184	NA
NA	zgc:154125	NA
NA	zgc:64189	NA
NA	zmp:0000000936	NA
NA	znf516	NA
NA	znf609b	NA
